# Supplementary material for: A Multi-Omics Approach to Evaluate the Toxicity Mechanisms Associated with Silver Nanoparticles Exposure
Source: MDPI journal article supplement (doi:10.3390/nano12101762), 2022-05-22
Supplement: s1 [file s1]

**Table S1.** Quantified metabolites in HepG2 cells after exposure to 5 µg/mL of AgNPs for 72 h with a match factor superior to 700.

| Compound                      | Retention time (min) | NIST Rmatch |
|-------------------------------|----------------------|-------------|
| 1- β-D-Glucopyranose          | 26.375               | 890         |
| 2- Malic acid                 | 17.466               | 728         |
| 3- L-Tyrosine                 | 25.543               | 782         |
| 4- D-Glucose                  | 24.964               | 870         |
| 5- Xylofuranose               | 32.638               | 793         |
| 6- L-Leucine                  | 19.177               | 700         |
| 7- L-Proline                  | 18.014               | 881         |
| 8- L-Cysteine                 | 18.711               | 868         |
| 9- Phosphoric acid            | 22.634               | 868         |
| 10- L-Threonine               | 15.285               | 865         |
| 11- Threitol                  | 17.864               | 851         |
| 12- Erythrose                 | 25.352               | 706         |
| 13- D-Fructose                | 24.294               | 767         |
| 14- Pantothenic acid          | 26.473               | 887         |
| 15- β-Aminoisobutyric<br>acid | 15.399               | 815         |
| 16- D-Galactose               | 25.192               | 848         |
| 17- Isocitric acid            | 23.595               | 815         |
| 18- L-Serine                  | 14.743               | 803         |
| 19- Hexadecanoic acid         | 27.295               | 846         |
| 20- Glutamine                 | 19.890               | 874         |
| 21- Myo-Inositol<br>phosphate | 32.426               | 827         |
| 22- Octadecanoic acid         | 30.225               | 839         |
| 23- L-Aspartic acid           | 18.086               | 791         |
| 24- Myo-Inositol              | 27.874               | 830         |
| 25- D-Ribofuranose            | 19.879               | 820         |
| 26- Palmitic acid             | 31.419               | 829         |
| 27- Rythonic acid             | 18.541               | 767         |

|                                                  |        |     |
|--------------------------------------------------|--------|-----|
| 28- L-Phenylalanine                              | 20.214 | 879 |
| 29- 4-Chlorophenylalanine<br>(internal standard) | 23.140 | -   |

---

Table S2. Pearson’s correlation matrix data for the 28 quantified metabolites.

|    | 1       | 2       | 3       | 4       | 5       | 6       | 7       | 8       | 9       | 10      | 11      | 12      | 13      | 14      | 15      | 16      | 17      | 18      | 19      | 20      | 21      | 22      | 23      | 24      | 25      | 26      | 27     | 28     |
|----|---------|---------|---------|---------|---------|---------|---------|---------|---------|---------|---------|---------|---------|---------|---------|---------|---------|---------|---------|---------|---------|---------|---------|---------|---------|---------|--------|--------|
| 1  | 1.0000  |         |         |         |         |         |         |         |         |         |         |         |         |         |         |         |         |         |         |         |         |         |         |         |         |         |        |        |
| 2  | 0.6045  | 1.0000  |         |         |         |         |         |         |         |         |         |         |         |         |         |         |         |         |         |         |         |         |         |         |         |         |        |        |
| 3  | 0.7217  | 0.8991  | 1.0000  |         |         |         |         |         |         |         |         |         |         |         |         |         |         |         |         |         |         |         |         |         |         |         |        |        |
| 4  | 0.4772  | 0.2328  | 0.2271  | 1.0000  |         |         |         |         |         |         |         |         |         |         |         |         |         |         |         |         |         |         |         |         |         |         |        |        |
| 5  | -0.2293 | -0.0845 | -0.2598 | 0.4698  | 1.0000  |         |         |         |         |         |         |         |         |         |         |         |         |         |         |         |         |         |         |         |         |         |        |        |
| 6  | 0.3376  | 0.5896  | 0.5680  | 0.5642  | 0.5395  | 1.0000  |         |         |         |         |         |         |         |         |         |         |         |         |         |         |         |         |         |         |         |         |        |        |
| 7  | 0.0628  | 0.4432  | 0.2546  | 0.5948  | 0.8019  | 0.8623  | 1.0000  |         |         |         |         |         |         |         |         |         |         |         |         |         |         |         |         |         |         |         |        |        |
| 8  | 0.3059  | 0.5859  | 0.3828  | 0.6886  | 0.6773  | 0.8286  | 0.9361  | 1.0000  |         |         |         |         |         |         |         |         |         |         |         |         |         |         |         |         |         |         |        |        |
| 9  | 0.3949  | 0.6587  | 0.5035  | 0.6940  | 0.6459  | 0.8946  | 0.9339  | 0.9734  | 1.0000  |         |         |         |         |         |         |         |         |         |         |         |         |         |         |         |         |         |        |        |
| 10 | 0.0457  | 0.4261  | 0.1552  | 0.5454  | 0.7733  | 0.7548  | 0.9197  | 0.9245  | 0.8816  | 1.0000  |         |         |         |         |         |         |         |         |         |         |         |         |         |         |         |         |        |        |
| 11 | 0.3772  | 0.6338  | 0.4349  | 0.3483  | 0.5804  | 0.7870  | 0.7880  | 0.8421  | 0.8631  | 0.8264  | 1.0000  |         |         |         |         |         |         |         |         |         |         |         |         |         |         |         |        |        |
| 12 | 0.3888  | 0.6657  | 0.4842  | 0.5187  | 0.6236  | 0.8651  | 0.8851  | 0.9444  | 0.9548  | 0.8901  | 0.9666  | 1.0000  |         |         |         |         |         |         |         |         |         |         |         |         |         |         |        |        |
| 13 | 0.5350  | 0.7361  | 0.5886  | 0.0670  | 0.1340  | 0.5915  | 0.4553  | 0.5486  | 0.6069  | 0.4669  | 0.8484  | 0.7455  | 1.0000  |         |         |         |         |         |         |         |         |         |         |         |         |         |        |        |
| 14 | 0.6259  | 0.6470  | 0.5680  | 0.2065  | 0.3161  | 0.5841  | 0.4808  | 0.5895  | 0.6630  | 0.4952  | 0.8772  | 0.7954  | 0.8636  | 1.0000  |         |         |         |         |         |         |         |         |         |         |         |         |        |        |
| 15 | -0.0214 | 0.1149  | -0.1076 | 0.0747  | 0.7102  | 0.4904  | 0.6015  | 0.5574  | 0.5344  | 0.6924  | 0.8187  | 0.7055  | 0.6269  | 0.6704  | 1.0000  |         |         |         |         |         |         |         |         |         |         |         |        |        |
| 16 | 0.5324  | 0.3271  | 0.1913  | 0.3560  | 0.4066  | 0.3789  | 0.3556  | 0.5469  | 0.5340  | 0.5468  | 0.7504  | 0.6717  | 0.6198  | 0.7932  | 0.6990  | 1.0000  |         |         |         |         |         |         |         |         |         |         |        |        |
| 17 | -0.1346 | 0.0974  | -0.2016 | -0.2655 | 0.2516  | -0.0274 | 0.2128  | 0.1326  | 0.1367  | 0.2408  | 0.4035  | 0.2504  | 0.5033  | 0.3660  | 0.5928  | 0.2068  | 1.0000  |         |         |         |         |         |         |         |         |         |        |        |
| 18 | -0.2403 | -0.0435 | -0.3468 | -0.1366 | -0.1072 | -0.3598 | -0.1540 | -0.1349 | -0.1722 | 0.0527  | -0.1068 | -0.1860 | 0.0122  | -0.2474 | 0.0130  | -0.0102 | 0.4894  | 1.0000  |         |         |         |         |         |         |         |         |        |        |
| 19 | -0.0755 | 0.0113  | -0.1832 | -0.3290 | -0.2961 | -0.4487 | -0.2216 | -0.2176 | -0.2525 | -0.2436 | -0.1450 | -0.2208 | 0.1286  | -0.0826 | -0.0629 | -0.2509 | 0.7134  | 0.4862  | 1.0000  |         |         |         |         |         |         |         |        |        |
| 20 | 0.1982  | 0.2312  | 0.0701  | 0.4492  | -0.1142 | 0.0305  | 0.0783  | 0.3058  | 0.1943  | 0.3248  | 0.0286  | 0.1363  | -0.0640 | -0.1716 | -0.1868 | 0.2181  | -0.3029 | 0.4140  | -0.1049 | 1.0000  |         |         |         |         |         |         |        |        |
| 21 | -0.1849 | 0.1082  | -0.0965 | 0.2763  | 0.1318  | 0.0178  | 0.1856  | 0.3298  | 0.1855  | 0.4110  | 0.0220  | 0.1381  | -0.2123 | -0.2574 | -0.0987 | 0.1344  | -0.3552 | 0.3187  | -0.2928 | 0.8330  | 1.0000  |         |         |         |         |         |        |        |
| 22 | 0.0678  | 0.1435  | -0.0735 | 0.4686  | 0.3357  | 0.2823  | 0.3752  | 0.5498  | 0.4165  | 0.6499  | 0.3801  | 0.4434  | 0.1170  | 0.0924  | 0.3163  | 0.5462  | -0.1748 | 0.2647  | -0.3539 | 0.8290  | 0.8286  | 1.0000  |         |         |         |         |        |        |
| 23 | 0.1748  | 0.5289  | 0.3293  | 0.2697  | -0.0528 | 0.2400  | 0.2455  | 0.4612  | 0.3684  | 0.4687  | 0.2862  | 0.3686  | 0.2077  | 0.0770  | -0.0264 | 0.3038  | -0.2633 | 0.2860  | -0.2319 | 0.8568  | 0.8704  | 0.8023  | 1.0000  |         |         |         |        |        |
| 24 | 0.1997  | 0.4974  | 0.2610  | 0.2543  | 0.0246  | 0.2554  | 0.2670  | 0.4888  | 0.3937  | 0.5470  | 0.4052  | 0.4438  | 0.3122  | 0.1993  | 0.1660  | 0.4760  | -0.1241 | 0.3481  | -0.2119 | 0.8466  | 0.8196  | 0.8719  | 0.9675  | 1.0000  |         |         |        |        |
| 25 | -0.4482 | -0.2318 | -0.2240 | 0.1978  | 0.4370  | -0.0174 | 0.2497  | 0.1290  | 0.0961  | 0.1616  | -0.2037 | -0.0472 | -0.6068 | -0.3089 | -0.1978 | -0.3013 | -0.3262 | -0.2732 | -0.3023 | -0.0723 | 0.3034  | -0.0209 | -0.0420 | -0.1571 | 1.0000  |         |        |        |
| 26 | 0.0194  | 0.0936  | 0.0564  | 0.6254  | 0.2924  | 0.2376  | 0.4441  | 0.3648  | 0.3846  | 0.2167  | -0.0628 | 0.1259  | -0.2225 | -0.2173 | -0.2775 | -0.3558 | -0.0142 | 0.0182  | 0.1922  | 0.0960  | 0.0442  | -0.1052 | -0.0739 | -0.2030 | 0.4592  | 1.0000  |        |        |
| 27 | -0.1849 | -0.2432 | -0.2131 | -0.2194 | -0.0457 | -0.4518 | -0.3797 | -0.3012 | -0.3354 | -0.1904 | -0.2843 | -0.2996 | -0.4500 | -0.1342 | -0.1852 | 0.1395  | -0.3769 | -0.0137 | -0.3916 | 0.1082  | 0.3918  | 0.1586  | 0.1808  | 0.1742  | 0.4765  | -0.3884 | 1.0000 |        |
| 28 | 0.7399  | -0.0273 | 0.1148  | 0.4077  | -0.1883 | -0.1573 | -0.2859 | -0.0951 | -0.0354 | -0.2685 | -0.0410 | -0.0694 | 0.0824  | 0.2687  | -0.1130 | 0.4246  | -0.0664 | -0.0303 | 0.0628  | 0.0869  | -0.2934 | -0.0483 | -0.2028 | -0.1366 | -0.3441 | 0.0384  | 0.0179 | 1.0000 |
