# Supplementary material for: A Multi-Omics Approach to Evaluate the Toxicity Mechanisms Associated with Silver Nanoparticles Exposure
Source: MDPI journal article supplement (doi:10.3390/nano12101762), 2022-05-22
Supplement: s1 [file s1]

**Table S3.** Whole transcriptome analysis of HepG2 cells exposed to 10 nm AgNPs

| Gene name                                                            | Gene code      | FC      |
|----------------------------------------------------------------------|----------------|---------|
| annexin A1                                                           | ANXA1          | 1364,89 |
| SPANX family, member B1                                              | SPANXB1        | 566,34  |
| carboxypeptidase A4                                                  | CPA4           | 483,63  |
| serpin peptidase inhibitor, clade B (ovalbumin), member 2            | SERPINB2       | 440,35  |
| chemokine (C-C motif) receptor 7                                     | CCR7           | 333,90  |
| lysosomal protein transmembrane 5                                    | LAPTM5         | 295,82  |
| cytidine deaminase                                                   | CDA            | 252,56  |
| pregnancy specific beta-1-glycoprotein 9                             | PSG9           | 202,55  |
| matrix metalloproteinase 3                                           | MMP3           | 199,46  |
| endothelial cell adhesion molecule                                   | ESAM           | 171,97  |
| nitric oxide synthase 3 (endothelial cell)                           | NOS3           | 171,19  |
| matrix metalloproteinase 1                                           | MMP1           | 165,48  |
| progestagen-associated endometrial protein                           | PAEP           | 132,19  |
| integrin alpha 3                                                     | ITGA3          | 129,85  |
| cathepsin E                                                          | CTSE           | 118,54  |
| interleukin 18                                                       | IL18           | 117,54  |
| G protein-coupled receptor, class C, group 5, member A; microRNA 614 | GPRC5A; MIR614 | 113,10  |
| myeloid/lymphoid or mixed-lineage leukemia; translocated to, 11      | MLLT11         | 111,44  |
| multiple C2 domains, transmembrane 1                                 | MCTP1          | 102,47  |
| heat shock 22kDa protein 8                                           | HSPB8          | 98,51   |
| transmembrane 4 L six family member 19                               | TM4SF19        | 98,16   |
| interleukin 1 receptor accessory protein-like 1                      | IL1RAPL1       | 97,28   |
| aquaporin 3 (Gill blood group)                                       | AQP3           | 82,62   |
| cytochrome P450, family 2, subfamily S, polypeptide 1                | CYP2S1         | 78,19   |
| CD22 molecule; microRNA 5196                                         | CD22; MIR5196  | 75,53   |
| tensin 4                                                             | TNS4           | 74,91   |
| tumor suppressor candidate 3                                         | TUSC3          | 71,52   |
| transmembrane protein 92                                             | TMEM92         | 70,95   |
| cytochrome P450, family 24, subfamily A, polypeptide 1               | CYP24A1        | 70,27   |
| myoferlin                                                            | MYOF           | 68,63   |
| SP140 nuclear body protein                                           | SP140          | 68,62   |
| sel-1 suppressor of lin-12-like 3 (C. elegans)                       | SEL1L3         | 68,41   |
| transgelin 2                                                         | TAGLN2         | 67,46   |
| CD79a molecule, immunoglobulin-associated alpha                      | CD79A          | 62,78   |
| apolipoprotein B mRNA editing enzyme, catalytic polypeptide-like 3B  | APOBEC3B       | 62,47   |
| heme oxygenase 1                                                     | HMOX1          | 60,53   |
| glycerol-3-phosphate acyltransferase 3                               | GPAT3          | 58,92   |
| GLI pathogenesis-related 1                                           | GLIPR1         | 58,10   |

|                                                                  |                  |       |
|------------------------------------------------------------------|------------------|-------|
| CAP-GLY domain containing linker protein family, member 4        | CLIP4            | 57,82 |
| AHNAK nucleoprotein 2                                            | AHNAK2           | 56,78 |
| S100 calcium binding protein A11                                 | S100A11          | 54,86 |
| RAB3B, member RAS oncogene family                                | RAB3B            | 53,30 |
| crystallin alpha B                                               | CRYAB            | 52,58 |
| solute carrier family 16, member 6                               | SLC16A6          | 52,49 |
| neurotensin receptor 1 (high affinity)                           | NTSR1            | 52,32 |
| insulin like growth factor binding protein 6                     | IGFBP6           | 52,08 |
| glutaminyI-peptide cyclotransferase                              | QPCT             | 50,08 |
| tyrosine kinase with immunoglobulin-like and EGF-like domains 1  | TIE1             | 49,65 |
| interleukin 2 receptor, gamma                                    | IL2RG            | 48,93 |
| four and a half LIM domains 2                                    | FHL2             | 48,71 |
| solute carrier family 16, member 2 (thyroid hormone transporter) | SLC16A2          | 46,40 |
| epithelial membrane protein 3                                    | EMP3             | 45,63 |
| TM4SF19-TCTEX1D2 readthrough (NMD candidate)                     | TM4SF19-TCTEX1D2 | 45,30 |
| solute carrier family 12, member 8                               | SLC12A8          | 44,68 |
| annexin A3                                                       | ANXA3            | 41,47 |
| ankyrin repeat domain 1 (cardiac muscle)                         | ANKRD1           | 41,28 |
| RNA binding motif, single stranded interacting protein 2         | RBMS2            | 40,98 |
| calpain 2, (m/II) large subunit                                  | CAPN2            | 40,55 |
| tripartite motif containing 29                                   | TRIM29           | 39,87 |
| synaptopodin                                                     | SYNPO            | 39,09 |
| EH domain containing 2                                           | EHD2             | 38,41 |
| neuropilin 1                                                     | NRP1             | 36,87 |
| paired box 6                                                     | PAX6             | 36,74 |
| dual specificity phosphatase 5                                   | DUSP5            | 36,44 |
| coagulation factor II (thrombin) receptor-like 1                 | F2RL1            | 35,85 |
| vanin 1                                                          | VNN1             | 34,63 |
| phosphofructokinase, platelet                                    | PFKP             | 34,45 |
| golgin A8 family, member N                                       | GOLGA8N          | 33,44 |
| AXL receptor tyrosine kinase                                     | AXL              | 33,11 |
| BCL2-related protein A1                                          | BCL2A1           | 32,58 |
| stratifin                                                        | SFN              | 32,54 |
| transmembrane protein 156                                        | TMEM156          | 32,28 |
| lymphocyte cytosolic protein 1 (L-plastin)                       | LCP1             | 32,11 |
| S100 calcium binding protein A3                                  | S100A3           | 31,89 |
| leucine rich repeat neuronal 4                                   | LRRN4            | 31,50 |
| solute carrier family 16, member 4                               | SLC16A4          | 30,83 |
| nucleic acid binding protein 1                                   | NABP1            | 29,45 |
| prostaglandin reductase 1                                        | PTGR1            | 29,27 |
| lymphatic vessel endothelial hyaluronan receptor 1               | LYVE1            | 28,96 |

|                                                                                                                                                                                                                                                                                                                                                                                                                                                                                                                               |                                                                                              |       |
|-------------------------------------------------------------------------------------------------------------------------------------------------------------------------------------------------------------------------------------------------------------------------------------------------------------------------------------------------------------------------------------------------------------------------------------------------------------------------------------------------------------------------------|----------------------------------------------------------------------------------------------|-------|
| suprabasin                                                                                                                                                                                                                                                                                                                                                                                                                                                                                                                    | SBSN                                                                                         | 28,81 |
| solute carrier family 7 (amino acid transporter light chain, y+L system), member 7                                                                                                                                                                                                                                                                                                                                                                                                                                            | SLC7A7                                                                                       | 28,06 |
| late cornified envelope 2C                                                                                                                                                                                                                                                                                                                                                                                                                                                                                                    | LCE2C                                                                                        | 27,74 |
| FXYD domain containing ion transport regulator 5                                                                                                                                                                                                                                                                                                                                                                                                                                                                              | FXYD5                                                                                        | 27,70 |
| keratin 12, type I                                                                                                                                                                                                                                                                                                                                                                                                                                                                                                            | KRT12                                                                                        | 27,68 |
| chemokine (C-X-C motif) ligand 8                                                                                                                                                                                                                                                                                                                                                                                                                                                                                              | CXCL8                                                                                        | 27,27 |
| glia maturation factor, gamma                                                                                                                                                                                                                                                                                                                                                                                                                                                                                                 | GMFG                                                                                         | 26,94 |
| FOS-like antigen 1                                                                                                                                                                                                                                                                                                                                                                                                                                                                                                            | FOSL1                                                                                        | 26,76 |
| kallikrein related peptidase 6                                                                                                                                                                                                                                                                                                                                                                                                                                                                                                | KLK6                                                                                         | 26,17 |
| tissue factor pathway inhibitor 2                                                                                                                                                                                                                                                                                                                                                                                                                                                                                             | TFPI2                                                                                        | 25,59 |
| inositol 1,4,5-trisphosphate receptor, type 3                                                                                                                                                                                                                                                                                                                                                                                                                                                                                 | ITPR3                                                                                        | 25,13 |
| sushi-repeat containing protein, X-linked 2                                                                                                                                                                                                                                                                                                                                                                                                                                                                                   | SRPX2                                                                                        | 25,05 |
| katanin p80 subunit B-like 1                                                                                                                                                                                                                                                                                                                                                                                                                                                                                                  | KATNBL1                                                                                      | 24,68 |
| SPANX family, member A2                                                                                                                                                                                                                                                                                                                                                                                                                                                                                                       | SPANXA2                                                                                      | 24,54 |
| ATP binding cassette subfamily C member 3                                                                                                                                                                                                                                                                                                                                                                                                                                                                                     | ABCC3                                                                                        | 24,21 |
| solute carrier family 40 (iron-regulated transporter), member 1                                                                                                                                                                                                                                                                                                                                                                                                                                                               | SLC40A1                                                                                      | 24,05 |
| bile acid-CoA:amino acid N-acyltransferase                                                                                                                                                                                                                                                                                                                                                                                                                                                                                    | BAAT                                                                                         | 23,92 |
| laminin, beta 3; microRNA 4260                                                                                                                                                                                                                                                                                                                                                                                                                                                                                                | LAMB3; MIR4260                                                                               | 23,64 |
| protein C receptor, endothelial                                                                                                                                                                                                                                                                                                                                                                                                                                                                                               | PROCR                                                                                        | 23,58 |
| UDP glucuronosyltransferase 1 family, polypeptide A1;<br>UDP glucuronosyltransferase 1 family, polypeptide A6;<br>UDP glucuronosyltransferase 1 family, polypeptide A4;<br>UDP glucuronosyltransferase 1 family, polypeptide A10;<br>UDP glucuronosyltransferase 1 family, polypeptide A8;<br>UDP glucuronosyltransferase 1 family, polypeptide A7;<br>UDP glucuronosyltransferase 1 family, polypeptide A5;<br>UDP glucuronosyltransferase 1 family, polypeptide A3;<br>UDP glucuronosyltransferase 1 family, polypeptide A9 | UGT1A1;<br>UGT1A6;<br>UGT1A4;<br>UGT1A10;<br>UGT1A8;<br>UGT1A7;<br>UGT1A5;<br>UGT1A3; UGT1A9 | 23,49 |
| transmembrane protein 173                                                                                                                                                                                                                                                                                                                                                                                                                                                                                                     | TMEM173                                                                                      | 23,39 |
| fatty acid binding protein 3, muscle and heart                                                                                                                                                                                                                                                                                                                                                                                                                                                                                | FABP3                                                                                        | 22,97 |
| serine incorporator 2                                                                                                                                                                                                                                                                                                                                                                                                                                                                                                         | SERINC2                                                                                      | 22,96 |
| Dab, mitogen-responsive phosphoprotein, homolog 2 (Drosophila)                                                                                                                                                                                                                                                                                                                                                                                                                                                                | DAB2                                                                                         | 22,70 |
| serglycin                                                                                                                                                                                                                                                                                                                                                                                                                                                                                                                     | SRGN                                                                                         | 22,18 |
| neuron navigator 3                                                                                                                                                                                                                                                                                                                                                                                                                                                                                                            | NAV3                                                                                         | 22,10 |
| proline rich 20D; proline rich 20B                                                                                                                                                                                                                                                                                                                                                                                                                                                                                            | PRR20D; PRR20B                                                                               | 21,94 |
| proline rich 20D; proline rich 20B                                                                                                                                                                                                                                                                                                                                                                                                                                                                                            | PRR20D; PRR20B                                                                               | 21,94 |
| proline rich 20C; proline rich 20E                                                                                                                                                                                                                                                                                                                                                                                                                                                                                            | PRR20C; PRR20E                                                                               | 21,94 |
| proline rich 20B; proline rich 20E; proline rich 20A; proline rich 20D                                                                                                                                                                                                                                                                                                                                                                                                                                                        | PRR20B; PRR20E;<br>PRR20A; PRR20D                                                            | 21,94 |
| proline rich 20C; proline rich 20D                                                                                                                                                                                                                                                                                                                                                                                                                                                                                            | PRR20C; PRR20D                                                                               | 21,94 |
| spexin hormone                                                                                                                                                                                                                                                                                                                                                                                                                                                                                                                | SPX                                                                                          | 21,64 |
| karyopherin alpha 7 (importin alpha 8)                                                                                                                                                                                                                                                                                                                                                                                                                                                                                        | KPNA7                                                                                        | 21,32 |

|                                                                      |                      |       |
|----------------------------------------------------------------------|----------------------|-------|
| Ras association (RalGDS/AF-6) domain family member 2                 | RASSF2               | 21,24 |
| major vault protein; PAXIP1 associated glutamate-rich protein 1      | MVP; PAGR1           | 21,08 |
| CD109 molecule                                                       | CD109                | 20,90 |
| pyruvate dehydrogenase phosphatase catalytic subunit 1               | PDP1                 | 20,74 |
| nitric oxide synthase trafficking                                    | NOSTRIN              | 20,73 |
| cAMP responsive element binding protein 5                            | CREB5                | 20,60 |
| proteolipid protein 2 (colonic epithelium-enriched)                  | PLP2                 | 20,53 |
| tubulin, alpha 4a                                                    | TUBA4A               | 20,51 |
| zinc finger protein 280A                                             | ZNF280A              | 20,37 |
| ELK3, ETS-domain protein (SRF accessory protein 2)                   | ELK3                 | 20,26 |
| golgin A8 family, member J; golgin A8 family, member I, pseudogene   | GOLGA8J;<br>GOLGA8IP | 19,60 |
| tetraspanin 1                                                        | TSPAN1               | 19,56 |
| Kruppel-like factor 5 (intestinal)                                   | KLF5                 | 19,34 |
| A kinase (PRKA) anchor protein 12                                    | AKAP12               | 18,99 |
| sushi domain containing 2                                            | SUSD2                | 18,90 |
| adhesion G protein-coupled receptor G1                               | ADGRG1               | 18,70 |
| lipase, member H                                                     | LIPH                 | 18,47 |
| CD52 molecule                                                        | CD52                 | 18,44 |
| eukaryotic translation initiation factor 5A2                         | EIF5A2               | 18,37 |
| calponin 1, basic, smooth muscle                                     | CNN1                 | 18,17 |
| RAB7B, member RAS oncogene family                                    | RAB7B                | 18,12 |
| interleukin 6 receptor                                               | IL6R                 | 17,89 |
| coronin, actin binding protein, 2B                                   | CORO2B               | 17,86 |
| adaptor-related protein complex 1 sigma 3 subunit                    | AP1S3                | 16,77 |
| transforming growth factor beta 1 induced transcript 1               | TGFB111              | 16,68 |
| FERM domain containing 5                                             | FRMD5                | 16,62 |
| hexokinase domain containing 1                                       | HKDC1                | 16,52 |
| cell death-inducing DFFA-like effector c                             | CIDEA                | 16,48 |
| tetratricopeptide repeat domain 9                                    | TTC9                 | 16,18 |
| TIMP metalloproteinase inhibitor 1                                   | TIMP1                | 16,11 |
| tetraspanin 5                                                        | TSPAN5               | 16,10 |
| palladin, cytoskeletal associated protein                            | PALLD                | 15,97 |
| protein phosphatase 1, regulatory subunit 18                         | PPP1R18              | 15,95 |
| golgin A8 family, member R                                           | GOLGA8R              | 15,85 |
| golgin A8 family, member T                                           | GOLGA8T              | 15,70 |
| engulfment and cell motility 1                                       | ELMO1                | 15,37 |
| E74-like factor 4 (ets domain transcription factor)                  | ELF4                 | 14,97 |
| solute carrier family 37 (glucose-6-phosphate transporter), member 2 | SLC37A2              | 14,89 |
| golgin A8 family, member J                                           | GOLGA8J              | 14,84 |
| serpin peptidase inhibitor, clade B (ovalbumin), member 8            | SERPINB8             | 14,82 |



|                                                                                         |                 |       |
|-----------------------------------------------------------------------------------------|-----------------|-------|
| basic leucine zipper transcription factor, ATF-like                                     | BATF            | 14,74 |
| sulfide quinone reductase-like (yeast)                                                  | SQRDL           | 14,62 |
| chromosome 19 open reading frame 33                                                     | C19orf33        | 14,60 |
| SPANX family, member D                                                                  | SPANXD          | 14,30 |
| gamma-glutamyltransferase 5                                                             | GGT5            | 14,10 |
| insulin like growth factor binding protein 7                                            | IGFBP7          | 14,06 |
| CEP295 N-terminal like; TIMP metalloproteinase inhibitor 2                              | CEP295NL; TIMP2 | 14,01 |
| solute carrier family 48 (heme transporter), member 1                                   | SLC48A1         | 13,86 |
| SPANX family, member C; SPANX family, member D                                          | SPANXC; SPANXD  | 13,84 |
| RAS guanyl releasing protein 3 (calcium and DAG-regulated)                              | RASGRP3         | 13,82 |
| myosin IF                                                                               | MYO1F           | 13,81 |
| leucine zipper-EF-hand containing transmembrane protein 2                               | LETM2           | 13,76 |
| plasminogen activator, urokinase receptor                                               | PLAUR           | 13,65 |
| splA/ryanodine receptor domain and SOCS box containing 1                                | SPSB1           | 13,55 |
| troponin C type 1 (slow)                                                                | TNNC1           | 13,45 |
| arrestin domain containing 3                                                            | ARRDC3          | 13,19 |
| retinol binding protein 1, cellular                                                     | RBP1            | 13,04 |
| SH3 domain containing ring finger 1                                                     | SH3RF1          | 12,86 |
| aldehyde oxidase 1                                                                      | AOX1            | 12,67 |
| SH3 domain binding glutamate-rich protein like 3                                        | SH3BGL3         | 12,65 |
| zinc finger protein 185 (LIM domain)                                                    | ZNF185          | 12,41 |
| suppressor of cytokine signaling 2                                                      | SOCS2           | 12,34 |
| CD9 molecule                                                                            | CD9             | 12,26 |
| solute carrier family 22, member 18                                                     | SLC22A18        | 12,25 |
| golgin A8 family, member O                                                              | GOLGA8O         | 12,24 |
| cystatin SN                                                                             | CST1            | 12,06 |
| vestigial-like family member 3                                                          | VGLL3           | 11,92 |
| hexokinase 1                                                                            | HK1             | 11,86 |
| sphingomyelin synthase 2                                                                | SGMS2           | 11,76 |
| leukocyte-associated immunoglobulin-like receptor 2                                     | LAIR2           | 11,75 |
| testis expressed 37                                                                     | TEX37           | 11,70 |
| uridine phosphorylase 1                                                                 | UPP1            | 11,63 |
| ras-related C3 botulinum toxin substrate 2 (rho family, small GTP binding protein Rac2) | RAC2            | 11,56 |
| ret finger protein-like 4A                                                              | RFPL4A          | 11,55 |
| mucin 13, cell surface associated                                                       | MUC13           | 11,15 |
| cellular retinoic acid binding protein 2                                                | CRABP2          | 11,01 |
| calpain 3                                                                               | CAPN3           | 11,00 |
| protein phosphatase 1, regulatory subunit 15A                                           | PPP1R15A        | 10,99 |
| keratin 23, type I                                                                      | KRT23           | 10,97 |
| F-box and leucine-rich repeat protein 2                                                 | FBXL2           | 10,80 |

|                                                                       |               |       |
|-----------------------------------------------------------------------|---------------|-------|
| colony stimulating factor 1 (macrophage)                              | CSF1          | 10,62 |
| syntaxin 3                                                            | STX3          | 10,60 |
| cardiotrophin-like cytokine factor 1                                  | CLCF1         | 10,50 |
| jun proto-oncogene                                                    | JUN           | 10,48 |
| SH3 domain and tetratricopeptide repeats 2                            | SH3TC2        | 10,42 |
| insulin like growth factor binding protein 4                          | IGFBP4        | 10,41 |
| chemokine (C-C motif) receptor-like 2                                 | CCRL2         | 10,36 |
| cystatin S                                                            | CST4          | 10,29 |
| neutrophil cytosolic factor 2                                         | NCF2          | 10,26 |
| CD68 molecule                                                         | CD68          | 10,23 |
| toll-like receptor 4                                                  | TLR4          | 10,19 |
| regulator of G-protein signaling 10                                   | RGS10         | 10,17 |
| lectin, galactoside-binding, soluble, 1                               | LGALS1        | 10,10 |
| S100 calcium binding protein A16                                      | S100A16       | 10,10 |
| syndecan 4                                                            | SDC4          | 10,10 |
| interferon, gamma-inducible protein 16                                | IFI16         | 10,07 |
| peripheral myelin protein 22                                          | PMP22         | 10,00 |
| glucosaminyl (N-acetyl) transferase 3, mucin type                     | GCNT3         | 9,90  |
| sequestosome 1                                                        | SQSTM1        | 9,90  |
| 2-5-oligoadenylate synthetase 1                                       | OAS1          | 9,87  |
| related RAS viral (r-ras) oncogene homolog                            | RRAS          | 9,77  |
| chromosome 12 open reading frame 75                                   | C12orf75      | 9,69  |
| interleukin 4 receptor                                                | IL4R          | 9,68  |
| golgin A8 family, member M                                            | GOLGA8M       | 9,67  |
| toll-like receptor 6                                                  | TLR6          | 9,67  |
| integrin alpha 5                                                      | ITGA5         | 9,67  |
| ankyrin repeat and SOCS box containing 4                              | ASB4          | 9,62  |
| matrix metalloproteinase 14 (membrane-inserted)                       | MMP14         | 9,55  |
| P2RX5-TAX1BP3 readthrough (NMD candidate)                             | P2RX5-TAX1BP3 | 9,52  |
| moesin                                                                | MSN           | 9,50  |
| sperm-tail PG-rich repeat containing 1                                | STPG1         | 9,48  |
| myeloma overexpressed                                                 | MYEOV         | 9,43  |
| S100 calcium binding protein A6                                       | S100A6        | 9,42  |
| leupaxin                                                              | LPXN          | 9,23  |
| solute carrier family 5 (sodium/inositol cotransporter), member 11    | SLC5A11       | 9,22  |
| sperm protein associated with the nucleus, X-linked, family member A1 | SPANXA1       | 9,21  |
| abhydrolase domain containing 4                                       | ABHD4         | 9,14  |
| histidine-rich glycoprotein                                           | HRG           | 9,12  |
| spermidine/spermine N1-acetyltransferase 1                            | SAT1          | 9,11  |
| adenosine monophosphate deaminase 3                                   | AMPD3         | 9,11  |
| SLIT-ROBO Rho GTPase activating protein 1                             | SRGAP1        | 8,91  |
| diacylglycerol kinase alpha                                           | DGKA          | 8,91  |
| claudin 4                                                             | CLDN4         | 8,90  |

|                                                                                               |                       |      |
|-----------------------------------------------------------------------------------------------|-----------------------|------|
| septin 1                                                                                      | sept-01               | 8,87 |
| sprouty-related, EVH1 domain containing 3                                                     | SPRED3                | 8,87 |
| amphiregulin                                                                                  | AREG                  | 8,72 |
| chromosome 14 open reading frame 105                                                          | C14orf105             | 8,69 |
| iduronate 2-sulfatase                                                                         | IDS                   | 8,68 |
| ras homolog family member C                                                                   | RHOC                  | 8,67 |
| lectin, galactoside-binding, soluble, 3                                                       | LGALS3                | 8,66 |
| RAB27B, member RAS oncogene family                                                            | RAB27B                | 8,64 |
| schlafen family member 5                                                                      | SLFN5                 | 8,64 |
| ankyrin repeat and SOCS box containing 2                                                      | ASB2                  | 8,58 |
| serpin peptidase inhibitor, clade E (nexin, plasminogen activator inhibitor type 1), member 2 | SERPINE2              | 8,56 |
| leukemia inhibitory factor                                                                    | LIF                   | 8,53 |
| potassium channel, voltage gated KQT-like subfamily Q, member 3                               | KCNQ3                 | 8,51 |
| sulfiredoxin 1                                                                                | SRXN1                 | 8,50 |
| interleukin 11                                                                                | IL11                  | 8,41 |
| SH3 domain containing ring finger 2                                                           | SH3RF2                | 8,37 |
| purinergic receptor P2X, ligand gated ion channel, 5                                          | P2RX5                 | 8,35 |
| potassium channel, voltage gated subfamily E regulatory beta subunit 3                        | KCNE3                 | 8,35 |
| SERTA domain containing 1                                                                     | SERTAD1               | 8,34 |
| pleckstrin homology domain containing, family M (with RUN domain) member 1; microRNA 4315-1   | PLEKHM1;<br>MIR4315-1 | 8,25 |
| chromosome 6 open reading frame 132                                                           | C6orf132              | 8,25 |
| cytochrome P450, family 3, subfamily A, polypeptide 5                                         | CYP3A5                | 8,23 |
| tubulin, beta 6 class V                                                                       | TUBB6                 | 8,22 |
| claudin 6                                                                                     | CLDN6                 | 8,21 |
| killer cell lectin-like receptor subfamily C, member 2                                        | KLRC2                 | 8,17 |
| matrix metalloproteinase 19                                                                   | MMP19                 | 8,17 |
| solute carrier family 16 (monocarboxylate transporter), member 5                              | SLC16A5               | 7,97 |
| septin 4                                                                                      | sept-04               | 7,90 |
| Ras-related associated with diabetes                                                          | RRAD                  | 7,87 |
| progesterone and adipoQ receptor family member III                                            | PAQR3                 | 7,85 |
| copine VIII                                                                                   | CPNE8                 | 7,84 |
| synaptophysin-like 2                                                                          | SYPL2                 | 7,83 |
| metallothionein 1H                                                                            | MT1H                  | 7,81 |
| milk fat globule-EGF factor 8 protein                                                         | MFGE8                 | 7,79 |
| ubiquitin associated and SH3 domain containing B                                              | UBASH3B               | 7,76 |
| mitotic spindle positioning                                                                   | MISP                  | 7,75 |
| synaptotagmin XI                                                                              | SYT11                 | 7,74 |
| peroxisome proliferator-activated receptor delta                                              | PPARD                 | 7,68 |
| transglutaminase 2                                                                            | TGM2                  | 7,66 |
| chromosome 16 open reading frame 62                                                           | C16orf62              | 7,66 |

|                                                                                  |                     |      |
|----------------------------------------------------------------------------------|---------------------|------|
| ADAM metallopeptidase with thrombospondin type 1 motif 4                         | ADAMTS4             | 7,64 |
| PR domain containing 1, with ZNF domain                                          | PRDM1               | 7,60 |
| translocase of outer mitochondrial membrane 34                                   | TOMM34              | 7,58 |
| ryanodine receptor 3                                                             | RYR3                | 7,50 |
| glutamine-fructose-6-phosphate transaminase 2                                    | GFPT2               | 7,46 |
| transmembrane channel like 5                                                     | TMC5                | 7,46 |
| four and a half LIM domains 3                                                    | FHL3                | 7,39 |
| protein phosphatase 1, regulatory (inhibitor) subunit 1C                         | PPP1R1C             | 7,38 |
| growth factor receptor bound protein 10                                          | GRB10               | 7,36 |
| golgin A8 family, member N; golgin A8 family, member H                           | GOLGA8N;<br>GOLGA8H | 7,35 |
| zinc finger protein 165                                                          | ZNF165              | 7,34 |
| sirtuin 7                                                                        | SIRT7               | 7,32 |
| solute carrier family 44, member 4                                               | SLC44A4             | 7,32 |
| endogenous retrovirus group 48, member 1                                         | ERVH48-1            | 7,30 |
| solute carrier family 7 (amino acid transporter light chain, L system), member 8 | SLC7A8              | 7,30 |
| phosphatidylinositol transfer protein, cytoplasmic 1                             | PITPNC1             | 7,29 |
| quiescin Q6 sulfhydryl oxidase 1                                                 | QSOX1               | 7,28 |
| olfactomedin like 3                                                              | OLFML3              | 7,27 |
| metallothionein 1M                                                               | MT1M                | 7,27 |
| motile sperm domain containing 1                                                 | MOSPD1              | 7,27 |
| transgelin                                                                       | TAGLN               | 7,27 |
| pregnancy specific beta-1-glycoprotein 1                                         | PSG1                | 7,26 |
| platelet-derived growth factor alpha polypeptide                                 | PDGFA               | 7,25 |
| ZFP36 ring finger protein                                                        | ZFP36               | 7,22 |
| acyl-CoA synthetase long-chain family member 5                                   | ACSL5               | 7,22 |
| myotubularin related protein 11                                                  | MTMR11              | 7,19 |
| dual specificity phosphatase 1                                                   | DUSP1               | 7,18 |
| golgi transport 1A                                                               | GOLT1A              | 7,17 |
| chromosome 16 open reading frame 45                                              | C16orf45            | 7,17 |
| ABRA C-terminal like                                                             | ABRACL              | 7,15 |
| keratin 20, type I                                                               | KRT20               | 7,15 |
| serine/threonine kinase 17b                                                      | STK17B              | 7,12 |
| immediate early response 5                                                       | IER5                | 7,10 |
| kynureninase                                                                     | KYNU                | 7,10 |
| nuclear factor, erythroid 2-like 3                                               | NFE2L3              | 7,10 |
| 5-hydroxytryptamine (serotonin) receptor 1D, G protein-coupled                   | HTR1D               | 7,08 |
| fatty acid desaturase 3                                                          | FADS3               | 7,07 |
| pregnancy specific beta-1-glycoprotein 5                                         | PSG5                | 7,06 |
| phospholipase C, delta 3                                                         | PLCD3               | 7,01 |
| internexin neuronal intermediate filament protein, alpha                         | INA                 | 6,99 |

|                                                                                                   |                        |      |
|---------------------------------------------------------------------------------------------------|------------------------|------|
| zinc finger protein 841                                                                           | ZNF841                 | 6,97 |
| NDRG family member 4                                                                              | NDRG4                  | 6,95 |
| arrestin domain containing 4                                                                      | ARRDC4                 | 6,94 |
| keratin 19, type I                                                                                | KRT19                  | 6,92 |
| solute carrier organic anion transporter family, member 1B3                                       | SLCO1B3                | 6,91 |
| killer cell lectin-like receptor subfamily C, member 3                                            | KLRC3                  | 6,91 |
| ankyrin repeat domain 20 family, member A5, pseudogene; ras homolog family member T1 pseudogene 1 | ANKRD20A5P;<br>RHOT1P1 | 6,91 |
| family with sequence similarity 65, member A                                                      | FAM65A                 | 6,87 |
| leukocyte-associated immunoglobulin-like receptor 1                                               | LAIR1                  | 6,86 |
| Transcript Identified by AceView, Entrez Gene ID(s) 4846                                          | NOS3                   | 6,83 |
| chromosome 9 open reading frame 72                                                                | C9orf72                | 6,82 |
| polymerase (DNA-directed), delta 4, accessory subunit                                             | POLD4                  | 6,81 |
| serum deprivation response                                                                        | SDPR                   | 6,77 |
| proteolipid protein 1                                                                             | PLP1                   | 6,74 |
| chondroitin sulfate N-acetylgalactosaminyltransferase 2                                           | CSGALNACT2             | 6,72 |
| oxidative stress induced growth inhibitor 1                                                       | OSGIN1                 | 6,69 |
| keratin associated protein 2-3                                                                    | KRTAP2-3               | 6,69 |
| homer scaffolding protein 2                                                                       | HOMER2                 | 6,66 |
| extracellular matrix protein 1                                                                    | ECM1                   | 6,64 |
| perforin 1 (pore forming protein)                                                                 | PRF1                   | 6,63 |
| PQ loop repeat containing 2                                                                       | PQLC2                  | 6,58 |
| sulfotransferase family 1C member 2                                                               | SULT1C2                | 6,56 |
| formin 1                                                                                          | FMN1                   | 6,55 |
| FOS-like antigen 2                                                                                | FOSL2                  | 6,52 |
| S100 calcium binding protein A5                                                                   | S100A5                 | 6,49 |
| glycerophosphocholine phosphodiesterase 1                                                         | GPCPD1                 | 6,47 |
| pleckstrin homology-like domain, family A, member 2                                               | PHLDA2                 | 6,46 |
| carbohydrate (chondroitin 4) sulfotransferase 11                                                  | CHST11                 | 6,45 |
| ankyrin repeat domain 42                                                                          | ANKRD42                | 6,43 |
| chromosome 1 open reading frame 100                                                               | C1orf100               | 6,42 |
| B-cell CLL/lymphoma 9-like                                                                        | BCL9L                  | 6,40 |
| Kruppel-like factor 9                                                                             | KLF9                   | 6,39 |
| glutamate-cysteine ligase, modifier subunit                                                       | GCLM                   | 6,35 |
| nuclear receptor subfamily 1, group D, member 1                                                   | NR1D1                  | 6,35 |
| WD repeat domain 66                                                                               | WDR66                  | 6,35 |
| glucosidase, beta, acid                                                                           | GBA                    | 6,35 |
| cyclin-dependent kinase inhibitor 2A                                                              | CDKN2A                 | 6,34 |
| pyrimidinergic receptor P2Y, G-protein coupled, 4                                                 | P2RY4                  | 6,34 |
| early growth response 1                                                                           | EGR1                   | 6,33 |
| carboxylesterase 1                                                                                | CES1                   | 6,32 |
| formin 1                                                                                          | FMN1                   | 6,28 |

|                                                                                         |           |      |
|-----------------------------------------------------------------------------------------|-----------|------|
| PITH (C-terminal proteasome-interacting domain of thioredoxin-like) domain containing 1 | PITHD1    | 6,24 |
| chromosome 1 open reading frame 105                                                     | C1orf105  | 6,23 |
| cathepsin L                                                                             | CTSL      | 6,22 |
| cyclin-dependent kinase inhibitor 1A (p21, Cip1)                                        | CDKN1A    | 6,22 |
| RAS protein activator like 2                                                            | RASAL2    | 6,20 |
| transmembrane protein 40                                                                | TMEM40    | 6,16 |
| polo-like kinase 2                                                                      | PLK2      | 6,16 |
| small integral membrane protein 9                                                       | SMIM9     | 6,11 |
| microtubule associated protein 1B                                                       | MAP1B     | 6,11 |
| sterile alpha motif domain containing 5                                                 | SAMD5     | 6,11 |
| Fc fragment of IgE, high affinity I, receptor for; gamma polypeptide                    | FCER1G    | 6,11 |
| CD55 molecule, decay accelerating factor for complement (Cromer blood group)            | CD55      | 6,07 |
| thioredoxin reductase 1                                                                 | TXNRD1    | 6,04 |
| UL16 binding protein 3                                                                  | ULBP3     | 6,01 |
| interferon, alpha-inducible protein 27                                                  | IFI27     | 6,01 |
| aldo-keto reductase family 1, member B10 (aldose reductase)                             | AKR1B10   | 5,99 |
| heparin-binding EGF-like growth factor                                                  | HBEGF     | 5,98 |
| pregnancy specific beta-1-glycoprotein 6                                                | PSG6      | 5,97 |
| ubiquitin C-terminal hydrolase L1                                                       | UCHL1     | 5,94 |
| platelet-activating factor receptor                                                     | PTAFR     | 5,94 |
| aldo-keto reductase family 1, member B15                                                | AKR1B15   | 5,93 |
| poliovirus receptor-related 4                                                           | PVRL4     | 5,93 |
| GABA(A) receptor-associated protein like 1                                              | GABARAPL1 | 5,90 |
| RAB31, member RAS oncogene family                                                       | RAB31     | 5,90 |
| CDC42 small effector 1                                                                  | CDC42SE1  | 5,90 |
| metallothionein 1F                                                                      | MT1F      | 5,89 |
| v-ets avian erythroblastosis virus E26 oncogene homolog 1                               | ETS1      | 5,89 |
| dermokine                                                                               | DMKN      | 5,87 |
| myosin light chain kinase                                                               | MYLK      | 5,87 |
| purine nucleoside phosphorylase                                                         | PNP       | 5,86 |
| diacylglycerol lipase, beta                                                             | DAGLB     | 5,84 |
| dedicator of cytokinesis 11                                                             | DOCK11    | 5,82 |
| kinesin family member 17                                                                | KIF17     | 5,79 |
| dystrobrevin, alpha                                                                     | DTNA      | 5,71 |
| RIO kinase 3                                                                            | RIOK3     | 5,69 |
| chromosome 6 open reading frame 1                                                       | C6orf1    | 5,69 |
| cyclin D3                                                                               | CCND3     | 5,67 |
| G protein-coupled receptor 137B                                                         | GPR137B   | 5,66 |
| RNA binding protein with multiple splicing 2                                            | RBPM52    | 5,66 |

|                                                                                                                 |                       |      |
|-----------------------------------------------------------------------------------------------------------------|-----------------------|------|
| ATPase, aminophospholipid transporter, class I, type 8A, member 2                                               | ATP8A2                | 5,64 |
| adhesion G protein-coupled receptor E5                                                                          | ADGRE5                | 5,63 |
| CUB domain containing protein 1                                                                                 | CDCP1                 | 5,62 |
| ubiquitin specific peptidase 17-like family member 23<br>[Source:HGNC Symbol;Acc:HGNC:44451]                    | USP17L23              | 5,58 |
| CD24 molecule                                                                                                   | CD24                  | 5,58 |
| dystonin                                                                                                        | DST                   | 5,58 |
| diacylglycerol kinase gamma                                                                                     | DGKG                  | 5,57 |
| basic helix-loop-helix family, member e41                                                                       | BHLHE41               | 5,54 |
| popeye domain containing 3                                                                                      | POPDC3                | 5,52 |
| layilin                                                                                                         | LAYN                  | 5,52 |
| nexilin (F actin binding protein)                                                                               | NEXN                  | 5,49 |
| ADP-ribosylation factor like GTPase 8A                                                                          | ARL8A                 | 5,46 |
| cadherin-related family member 2                                                                                | CDHR2                 | 5,46 |
| clathrin, light chain B                                                                                         | CLTB                  | 5,45 |
| Tax1 (human T-cell leukemia virus type I) binding protein 3                                                     | TAX1BP3               | 5,45 |
| anthrax toxin receptor 2                                                                                        | ANTXR2                | 5,40 |
| transforming growth factor beta 1                                                                               | TGFB1                 | 5,39 |
| jagged 1                                                                                                        | JAG1                  | 5,39 |
| guanine nucleotide binding protein (G protein), alpha inhibiting activity polypeptide 1                         | GNAI1                 | 5,39 |
| zinc finger and BTB domain containing 20; microRNA 568                                                          | ZBTB20; MIR568        | 5,39 |
| LCK proto-oncogene, Src family tyrosine kinase                                                                  | LCK                   | 5,37 |
| protein kinase (cAMP-dependent, catalytic) inhibitor beta                                                       | PKIB                  | 5,36 |
| pecanex-like 2 (Drosophila)                                                                                     | PCNXL2                | 5,36 |
| endothelial cell surface expressed chemotaxis and apoptosis regulator                                           | ECSCR                 | 5,35 |
| dual specificity phosphatase 18                                                                                 | DUSP18                | 5,31 |
| VGF nerve growth factor inducible                                                                               | VGF                   | 5,27 |
| zinc finger, SWIM-type containing 6                                                                             | ZSWIM6                | 5,20 |
| matrix metalloproteinase 2                                                                                      | MMP2                  | 5,20 |
| dual specificity phosphatase 4                                                                                  | DUSP4                 | 5,19 |
| ubiquitin specific peptidase 17-like family member 27;<br>ubiquitin specific peptidase 17-like family member 28 | USP17L27;<br>USP17L28 | 5,16 |
| ubiquitin specific peptidase 17-like family member 28;<br>ubiquitin specific peptidase 17-like family member 30 | USP17L28;<br>USP17L30 | 5,16 |
| ubiquitin specific peptidase 17-like family member 29;<br>ubiquitin specific peptidase 17-like family member 5  | USP17L29;<br>USP17L5  | 5,16 |
| ubiquitin specific peptidase 17-like family member 25;<br>ubiquitin specific peptidase 17-like family member 30 | USP17L25;<br>USP17L30 | 5,16 |
| FERM domain containing 4A                                                                                       | FRMD4A                | 5,16 |

|                                                                                                    |              |      |
|----------------------------------------------------------------------------------------------------|--------------|------|
| N-acetylglutamate synthase                                                                         | NAGS         | 5,15 |
| glucosamine-6-phosphate deaminase 1                                                                | GNPDA1       | 5,14 |
| ret finger protein-like 4A-like 1                                                                  | RFPL4AL1     | 5,14 |
| ubiquitin specific peptidase 17-like family member 15                                              | USP17L15     | 5,14 |
| 4-hydroxyphenylpyruvate dioxygenase                                                                | HPD          | 5,13 |
| LIM and senescent cell antigen-like domains 2                                                      | LIMS2        | 5,12 |
| chemokine (C-C motif) ligand 22                                                                    | CCL22        | 5,11 |
| ADAM metallopeptidase domain 19                                                                    | ADAM19       | 5,06 |
| rhomboid 5 homolog 2 (Drosophila)                                                                  | RHBDF2       | 5,06 |
| microtubule associated monooxygenase, calponin and LIM domain containing 1                         | MICAL1       | 5,04 |
| STAM binding protein-like 1                                                                        | STAMBPL1     | 5,04 |
| CTTNBP2 N-terminal like                                                                            | CTTNBP2NL    | 5,00 |
| NUAK family, SNF1-like kinase, 2                                                                   | NUAK2        | 5,00 |
| distal-less homeobox 5                                                                             | DLX5         | 4,97 |
| intercellular adhesion molecule 2                                                                  | ICAM2        | 4,95 |
| neuregulin 1                                                                                       | NRG1         | 4,95 |
| transient receptor potential cation channel, subfamily V, member 2                                 | TRPV2        | 4,95 |
| glucocorticoid induced 1                                                                           | GLCCI1       | 4,93 |
| chromosome 3 open reading frame 52                                                                 | C3orf52      | 4,91 |
| testis expressed 19                                                                                | TEX19        | 4,91 |
| actin binding LIM protein family, member 3                                                         | ABLIM3       | 4,89 |
| calcium binding tyrosine-(Y)-phosphorylation regulated                                             | CABYR        | 4,89 |
| mucolipin 1                                                                                        | MCOLN1       | 4,88 |
| coactosin-like F-actin binding protein 1                                                           | COTL1        | 4,87 |
| transmembrane protein 59-like                                                                      | TMEM59L      | 4,86 |
| L1 cell adhesion molecule                                                                          | L1CAM        | 4,83 |
| sulfotransferase family 1C member 4                                                                | SULT1C4      | 4,82 |
| hematopoietic cell signal transducer                                                               | HCST         | 4,82 |
| STEAP family member 2, metalloredutase                                                             | STEAP2       | 4,82 |
| tubulin, beta 3 class III; melanocortin 1 receptor (alpha melanocyte stimulating hormone receptor) | TUBB3; MC1R  | 4,80 |
| granzyme B                                                                                         | GZMB         | 4,80 |
| OTU deubiquitinase, ubiquitin aldehyde binding 2                                                   | OTUB2        | 4,78 |
| Ras and Rab interactor 2                                                                           | RIN2         | 4,77 |
| glutamate receptor, ionotropic, N-methyl D-aspartate 2D                                            | GRIN2D       | 4,74 |
| adrenomedullin                                                                                     | ADM          | 4,73 |
| transcobalamin II                                                                                  | TCN2         | 4,71 |
| LDL receptor related protein 10                                                                    | LRP10        | 4,66 |
| regulator of cell cycle                                                                            | RGCC         | 4,65 |
| WD repeat domain 45; PRA1 domain family, member 2                                                  | WDR45; PRAF2 | 4,62 |
| 6-phosphofructo-2-kinase/fructose-2,6-biphosphatase 1                                              | PFKFB1       | 4,62 |
| transgelin 3                                                                                       | TAGLN3       | 4,62 |



|                                                                                                                                                                          |                                   |      |
|--------------------------------------------------------------------------------------------------------------------------------------------------------------------------|-----------------------------------|------|
| HSPB (heat shock 27kDa) associated protein 1                                                                                                                             | HSPBAP1                           | 4,61 |
| paroxysmal nonkinesigenic dyskinesia; microRNA 6810                                                                                                                      | PNKD; MIR6810                     | 4,60 |
| calcium binding and coiled-coil domain 1                                                                                                                                 | CALCOCO1                          | 4,60 |
| ubiquitin specific peptidase 17-like family member 28;<br>ubiquitin specific peptidase 17-like family member 5;<br>ubiquitin specific peptidase 17-like family member 24 | USP17L28;<br>USP17L5;<br>USP17L24 | 4,58 |
| S100 calcium binding protein A2                                                                                                                                          | S100A2                            | 4,57 |
| F-box protein 32                                                                                                                                                         | FBXO32                            | 4,57 |
| TBC/LysM-associated domain containing 1                                                                                                                                  | TLDC1                             | 4,55 |
| retinoic acid induced 14                                                                                                                                                 | RAI14                             | 4,55 |
| anterior gradient 2, protein disulphide isomerase family member                                                                                                          | AGR2                              | 4,54 |
| polypeptide N-acetylgalactosaminyltransferase 10                                                                                                                         | GALNT10                           | 4,53 |
| carboxylesterase 1 pseudogene 1; carboxylesterase 1                                                                                                                      | CES1P1; CES1                      | 4,52 |
| GULP, engulfment adaptor PTB domain containing 1                                                                                                                         | GULP1                             | 4,50 |
| progesterone and adiponectin receptor family member V                                                                                                                    | PAQR5                             | 4,50 |
| p21 protein (Cdc42/Rac)-activated kinase 1                                                                                                                               | PAK1                              | 4,49 |
| paxillin                                                                                                                                                                 | PXN                               | 4,48 |
| angiotensin II receptor-associated protein                                                                                                                               | AGTRAP                            | 4,47 |
| zinc finger protein 385A                                                                                                                                                 | ZNF385A                           | 4,47 |
| trefoil factor 1                                                                                                                                                         | TFF1                              | 4,47 |
| late cornified envelope 1D                                                                                                                                               | LCE1D                             | 4,45 |
| cancer/testis antigen family 45, member A6;<br>cancer/testis antigen family 45, member A7                                                                                | CT45A6; CT45A7                    | 4,44 |
| interferon-related developmental regulator 1                                                                                                                             | IFRD1                             | 4,43 |
| dopachrome tautomerase                                                                                                                                                   | DCT                               | 4,43 |
| hes-related family bHLH transcription factor with YRPW motif 1                                                                                                           | HEY1                              | 4,42 |
| DNA (cytosine-5-)-methyltransferase 3 beta                                                                                                                               | DNMT3B                            | 4,42 |
| family with sequence similarity 107, member B                                                                                                                            | FAM107B                           | 4,42 |
| WW and C2 domain containing 1                                                                                                                                            | WWC1                              | 4,41 |
| centrosomal protein 85kDa-like                                                                                                                                           | CEP85L                            | 4,40 |
| poliovirus receptor-related 1 (herpesvirus entry mediator C)                                                                                                             | PVRL1                             | 4,40 |
| mitochondrial fission regulator 2                                                                                                                                        | MTFR2                             | 4,39 |
| lysophosphatidic acid receptor 5                                                                                                                                         | LPAR5                             | 4,38 |
| dehydrogenase/reductase (SDR family) member 9                                                                                                                            | DHRS9                             | 4,38 |
| DEAD (Asp-Glu-Ala-Asp) box polypeptide 60-like                                                                                                                           | DDX60L                            | 4,37 |
| RNA binding motif protein 24                                                                                                                                             | RBM24                             | 4,36 |
| lymphocyte antigen 96                                                                                                                                                    | LY96                              | 4,36 |
| GRB2-related adaptor protein                                                                                                                                             | GRAP                              | 4,36 |
| formin 1                                                                                                                                                                 | FMN1                              | 4,36 |
| six transmembrane epithelial antigen of the prostate 1                                                                                                                   | STEAP1                            | 4,35 |
| potassium channel, voltage gated eag related subfamily H, member 2                                                                                                       | KCNH2                             | 4,35 |

|                                                                                           |                          |      |
|-------------------------------------------------------------------------------------------|--------------------------|------|
| transmembrane channel like 7                                                              | TMC7                     | 4,34 |
| leucine rich adaptor protein 1-like                                                       | LURAP1L                  | 4,34 |
| neuronal calcium sensor 1                                                                 | NCS1                     | 4,34 |
| ATPase, H <sup>+</sup> transporting, lysosomal 31kDa, V1 subunit E1                       | ATP6V1E1                 | 4,34 |
| UDP-Gal:betaGlcNAc beta 1,3-galactosyltransferase 5                                       | B3GALT5                  | 4,33 |
| DNA damage-induced apoptosis suppressor                                                   | DDIAS                    | 4,33 |
| gamma-aminobutyric acid (GABA) A receptor, epsilon;<br>microRNA 224; microRNA 452         | GABRE; MIR224;<br>MIR452 | 4,33 |
| metal-regulatory transcription factor 1                                                   | MTF1                     | 4,32 |
| ral guanine nucleotide dissociation stimulator-like 1                                     | RGL1                     | 4,32 |
| mitogen-activated protein kinase kinase kinase 12                                         | MAP3K12                  | 4,32 |
| STEAP family member 1B                                                                    | STEAP1B                  | 4,31 |
| ectopic P-granules autophagy protein 5 homolog (C.<br>elegans)                            | EPG5                     | 4,31 |
| transmembrane protein 144                                                                 | TMEM144                  | 4,29 |
| zymogen granule protein 16B                                                               | ZG16B                    | 4,28 |
| nestin                                                                                    | NES                      | 4,28 |
| APEX nuclease (apurinic/apyrimidinic endonuclease) 2                                      | APEX2                    | 4,27 |
| acyl-CoA synthetase long-chain family member 1                                            | ACSL1                    | 4,27 |
| collagen triple helix repeat containing 1                                                 | CTHRC1                   | 4,25 |
| synovial sarcoma, X breakpoint 1                                                          | SSX1                     | 4,25 |
| cancer/testis antigen family 45, member A7;<br>cancer/testis antigen family 45, member A6 | CT45A7; CT45A6           | 4,24 |
| ZFP36 ring finger protein-like 1                                                          | ZFP36L1                  | 4,24 |
| interleukin 20 receptor beta                                                              | IL20RB                   | 4,21 |
| polymerase (DNA directed) kappa                                                           | POLK                     | 4,21 |
| endothelin 1                                                                              | EDN1                     | 4,21 |
| anaphase promoting complex subunit 15                                                     | ANAPC15                  | 4,20 |
| spindle and kinetochore associated complex subunit 1                                      | SKA1                     | 4,20 |
| family with sequence similarity 50, member A                                              | FAM50A                   | 4,18 |
| chromosome 18 open reading frame 54                                                       | C18orf54                 | 4,17 |
| active BCR-related                                                                        | ABR                      | 4,14 |
| optineurin                                                                                | OPTN                     | 4,13 |
| activin A receptor type I                                                                 | ACVR1                    | 4,13 |
| epithelial membrane protein 1                                                             | EMP1                     | 4,12 |
| erythrocyte membrane protein band 4.1-like 1                                              | EPB41L1                  | 4,12 |
| polymerase (RNA) III (DNA directed) polypeptide C (62kD)                                  | POLR3C                   | 4,12 |
| ring finger protein 125, E3 ubiquitin protein ligase                                      | RNF125                   | 4,12 |
| chemokine (C-C motif) ligand 26                                                           | CCL26                    | 4,12 |
| guanylate binding protein 3                                                               | GBP3                     | 4,11 |
| myosin VA                                                                                 | MYO5A                    | 4,11 |
| ORMDL sphingolipid biosynthesis regulator 2                                               | ORMDL2                   | 4,11 |
| cyclin N-terminal domain containing 2                                                     | CNTD2                    | 4,11 |

|                                                                               |                |      |
|-------------------------------------------------------------------------------|----------------|------|
| RNA binding motif protein 47                                                  | RBM47          | 4,10 |
| basic leucine zipper nuclear factor 1                                         | BLZF1          | 4,09 |
| heat shock 70kDa protein 1A; heat shock 70kDa protein 1B                      | HSPA1A; HSPA1B | 4,09 |
| Memczak2013 ANTISENSE, coding, INTERNAL, UTR3 best transcript NM_002727       | SRGN           | 4,08 |
| interleukin 1 receptor, type II                                               | IL1R2          | 4,07 |
| inositol 1,4,5-trisphosphate receptor interacting protein                     | ITPRIP         | 4,07 |
| ceroid-lipofuscinosis, neuronal 8                                             | CLN8           | 4,07 |
| cysteine-rich, angiogenic inducer, 61                                         | CYR61          | 4,07 |
| nuclear receptor subfamily 1, group I, member 2                               | NR1I2          | 4,07 |
| IGF like family member 2                                                      | IGFL2          | 4,06 |
| phorbol-12-myristate-13-acetate-induced protein 1                             | PMAIP1         | 4,06 |
| biliverdin reductase B                                                        | BLVRB          | 4,04 |
| pleckstrin homology domain containing, family G (with RhoGef domain) member 4 | PLEKHG4        | 4,03 |
| pregnancy specific beta-1-glycoprotein 8                                      | PSG8           | 4,02 |
| Rho GTPase activating protein 42                                              | ARHGAP42       | 4,01 |
| CD163 molecule-like 1                                                         | CD163L1        | 4,01 |
| S100 calcium binding protein A10                                              | S100A10        | 4,00 |
| lymphoid enhancer-binding factor 1                                            | LEF1           | 4,00 |
| dynamin binding protein                                                       | DNMBP          | 4,00 |
| CAP, adenylate cyclase-associated protein, 2 (yeast)                          | CAP2           | 3,99 |
| solute carrier family 38, member 7                                            | SLC38A7        | 3,99 |
| caspase 8, apoptosis-related cysteine peptidase                               | CASP8          | 3,99 |
| AP2 associated kinase 1                                                       | AAK1           | 3,98 |
| two pore segment channel 1                                                    | TPCN1          | 3,98 |
| latent transforming growth factor beta binding protein 1                      | LTBP1          | 3,96 |
| signal transducing adaptor molecule (SH3 domain and ITAM motif) 1             | STAM           | 3,96 |
| solute carrier family 38, member 6                                            | SLC38A6        | 3,95 |
| tripartite motif containing 54                                                | TRIM54         | 3,95 |
| PALM2-AKAP2 readthrough                                                       | PALM2-AKAP2    | 3,95 |
| BAI1-associated protein 2-like 1                                              | BAIAP2L1       | 3,94 |
| phosphatidylinositol-5-phosphate 4-kinase, type II, alpha                     | PIP4K2A        | 3,94 |
| serine dehydratase-like                                                       | SDSL           | 3,93 |
| tumor necrosis factor receptor superfamily, member 12A                        | TNFRSF12A      | 3,92 |
| DnaJ (Hsp40) homolog, subfamily B, member 4                                   | DNAJB4         | 3,92 |
| heat shock 70kDa protein 1B; heat shock 70kDa protein 1A                      | HSPA1B; HSPA1A | 3,92 |
| SEC14-like lipid binding 2                                                    | SEC14L2        | 3,92 |
| mitogen-activated protein kinase 13                                           | MAPK13         | 3,91 |

|                                                                           |          |      |
|---------------------------------------------------------------------------|----------|------|
| stannin                                                                   | SNN      | 3,90 |
| snail family zinc finger 1                                                | SNAI1    | 3,87 |
| HECT, C2 and WW domain containing E3 ubiquitin protein<br>ligase 2        | HECW2    | 3,86 |
| arachidonate 5-lipoxygenase-activating protein                            | ALOX5AP  | 3,86 |
| melanoregulin                                                             | MREG     | 3,86 |
| HUS1 checkpoint clamp component                                           | HUS1     | 3,85 |
| hepatocyte growth factor-regulated tyrosine kinase<br>substrate           | HGS      | 3,85 |
| jun B proto-oncogene                                                      | JUNB     | 3,84 |
| Transcript Identified by AceView, Entrez Gene ID(s) 3684                  | ITGAM    | 3,84 |
| thioredoxin interacting protein                                           | TXNIP    | 3,84 |
| dedicator of cytokinesis 4                                                | DOCK4    | 3,83 |
| microtubule associated protein 1A                                         | MAP1A    | 3,82 |
| Memczak2013 ANTISENSE, CDS, coding, INTERNAL best<br>transcript NM_003123 | SPN      | 3,82 |
| keratin associated protein 2-1                                            | KRTAP2-1 | 3,82 |
| thymosin beta 4, X-linked                                                 | TMSB4X   | 3,82 |
| solute carrier family 8 (sodium/lithium/calcium<br>exchanger), member B1  | SLC8B1   | 3,81 |
| keratin associated protein 2-2                                            | KRTAP2-2 | 3,80 |
| allantoicase                                                              | ALLC     | 3,80 |
| SP110 nuclear body protein                                                | SP110    | 3,79 |
| Sec61 translocon alpha 2 subunit                                          | SEC61A2  | 3,79 |
| DPY30 domain containing 2                                                 | DYDC2    | 3,78 |
| coronin 6                                                                 | CORO6    | 3,78 |
| laccase (multicopper oxidoreductase) domain containing<br>1               | LACC1    | 3,77 |
| leucine rich repeat containing 8 family, member A                         | LRRC8A   | 3,76 |
| filamin A, alpha                                                          | FLNA     | 3,76 |
| drebrin 1                                                                 | DBN1     | 3,76 |
| thymosin beta 10                                                          | TMSB10   | 3,76 |
| calmodulin regulated spectrin-associated protein family,<br>member 2      | CAMSAP2  | 3,75 |
| tumor necrosis factor (ligand) superfamily, member 15                     | TNFSF15  | 3,75 |
| SET domain containing (lysine methyltransferase) 7                        | SETD7    | 3,75 |
| zinc finger protein 860                                                   | ZNF860   | 3,75 |
| solute carrier family 6 (neurotransmitter transporter),<br>member 6       | SLC6A6   | 3,74 |
| cytoplasmic polyadenylation element binding protein 4                     | CPEB4    | 3,74 |
| KIAA1217                                                                  | KIAA1217 | 3,73 |
| renin binding protein                                                     | RENBP    | 3,73 |
| mab-21-like 3 (C. elegans)                                                | MAB21L3  | 3,73 |
| immediate early response 2                                                | IER2     | 3,73 |

|                                                                                                        |               |      |
|--------------------------------------------------------------------------------------------------------|---------------|------|
| Kruppel-like factor 2                                                                                  | KLF2          | 3,72 |
| interleukin 32                                                                                         | IL32          | 3,70 |
| parvin, alpha                                                                                          | PARVA         | 3,70 |
| ATPase, H <sup>+</sup> transporting, lysosomal 34kDa, V1 subunit D                                     | ATP6V1D       | 3,69 |
| homolog of rat pragma of Rnd2; Tyrosine-protein kinase Sgk223 [Source:UniProtKB/Swiss-Prot;Acc:Q86YV5] | SGK223        | 3,69 |
| G protein-coupled receptor 3                                                                           | GPR3          | 3,69 |
| fyn-related Src family tyrosine kinase                                                                 | FRK           | 3,69 |
| coagulation factor II (thrombin) receptor                                                              | F2R           | 3,69 |
| LON peptidase N-terminal domain and ring finger 3                                                      | LONRF3        | 3,68 |
| thrombospondin 3                                                                                       | THBS3         | 3,67 |
| oxidative stress induced growth inhibitor family member 2                                              | OSGIN2        | 3,67 |
| adaptor-related protein complex 1 sigma 2 subunit                                                      | AP1S2         | 3,67 |
| RasGEF domain family member 1B                                                                         | RASGEF1B      | 3,67 |
| feline leukemia virus subgroup C cellular receptor family, member 2                                    | FLVCR2        | 3,66 |
| carbonic anhydrase XII                                                                                 | CA12          | 3,64 |
| dynein, cytoplasmic 2, heavy chain 1                                                                   | DYNC2H1       | 3,64 |
| solute carrier family 25, member 27                                                                    | SLC25A27      | 3,64 |
| hippocalcin-like 1                                                                                     | HPCAL1        | 3,63 |
| complement component 1, s subcomponent                                                                 | C1S           | 3,63 |
| RUN and SH3 domain containing 2                                                                        | RUSC2         | 3,63 |
| microtubule associated monooxygenase, calponin and LIM domain containing 2                             | MICAL2        | 3,63 |
| metallothionein 1X                                                                                     | MT1X          | 3,63 |
| spermine oxidase                                                                                       | SMOX          | 3,62 |
| ring finger protein 217                                                                                | RNF217        | 3,62 |
| cholesteryl ester transfer protein, plasma                                                             | CETP          | 3,62 |
| vacuolar protein sorting 11 homolog (S. cerevisiae)                                                    | VPS11         | 3,61 |
| melanoma cell adhesion molecule; microRNA 6756                                                         | MCAM; MIR6756 | 3,61 |
| cancer/testis antigen family 45, member A5                                                             | CT45A5        | 3,60 |
| serine peptidase inhibitor, Kunitz type 1                                                              | SPINT1        | 3,60 |
| collagen, type VI, alpha 1                                                                             | COL6A1        | 3,60 |
| POTE ankyrin domain family, member F                                                                   | POTEF         | 3,59 |
| NLR family, pyrin domain containing 10                                                                 | NLRP10        | 3,59 |
| IGF like family member 4                                                                               | IGFL4         | 3,59 |
| discoidin, CUB and LCCL domain containing 2                                                            | DCBLD2        | 3,58 |
| EF-hand domain family member D2                                                                        | EFHD2         | 3,57 |
| dedicator of cytokinesis 9                                                                             | DOCK9         | 3,56 |
| cytohesin 3                                                                                            | CYTH3         | 3,56 |
| regulator of G-protein signaling 20                                                                    | RGS20         | 3,56 |
| zinc finger protein 280C                                                                               | ZNF280C       | 3,55 |
| BEN domain containing 7                                                                                | BEND7         | 3,55 |
| centrosomal protein 128kDa                                                                             | CEP128        | 3,54 |

|                                                                                                                                                                                                                                                                                                                                                                                                                                                                                                                                                                                                                          |           |      |
|--------------------------------------------------------------------------------------------------------------------------------------------------------------------------------------------------------------------------------------------------------------------------------------------------------------------------------------------------------------------------------------------------------------------------------------------------------------------------------------------------------------------------------------------------------------------------------------------------------------------------|-----------|------|
| activating transcription factor 3                                                                                                                                                                                                                                                                                                                                                                                                                                                                                                                                                                                        | ATF3      | 3,53 |
| tripartite motif containing 38                                                                                                                                                                                                                                                                                                                                                                                                                                                                                                                                                                                           | TRIM38    | 3,53 |
| zinc finger protein 804A                                                                                                                                                                                                                                                                                                                                                                                                                                                                                                                                                                                                 | ZNF804A   | 3,52 |
| syndecan binding protein                                                                                                                                                                                                                                                                                                                                                                                                                                                                                                                                                                                                 | SDCBP     | 3,51 |
| cytoglobin                                                                                                                                                                                                                                                                                                                                                                                                                                                                                                                                                                                                               | CYGB      | 3,50 |
| trophoblast glycoprotein                                                                                                                                                                                                                                                                                                                                                                                                                                                                                                                                                                                                 | TPBG      | 3,50 |
| late endosomal/lysosomal adaptor, MAPK and MTOR activator 1                                                                                                                                                                                                                                                                                                                                                                                                                                                                                                                                                              | LAMTOR1   | 3,50 |
| transmembrane protein 87B                                                                                                                                                                                                                                                                                                                                                                                                                                                                                                                                                                                                | TMEM87B   | 3,50 |
| long intergenic non-protein coding RNA 1588                                                                                                                                                                                                                                                                                                                                                                                                                                                                                                                                                                              | LINC01588 | 3,49 |
| ATPase, H <sup>+</sup> transporting, lysosomal V0 subunit a4                                                                                                                                                                                                                                                                                                                                                                                                                                                                                                                                                             | ATP6V0A4  | 3,49 |
| glutamate-cysteine ligase, catalytic subunit                                                                                                                                                                                                                                                                                                                                                                                                                                                                                                                                                                             | GCLC      | 3,49 |
| serine/threonine kinase 17a                                                                                                                                                                                                                                                                                                                                                                                                                                                                                                                                                                                              | STK17A    | 3,48 |
| CDK5 regulatory subunit associated protein 2                                                                                                                                                                                                                                                                                                                                                                                                                                                                                                                                                                             | CDK5RAP2  | 3,48 |
| ferredoxin 1-like                                                                                                                                                                                                                                                                                                                                                                                                                                                                                                                                                                                                        | FDX1L     | 3,47 |
| sterile alpha motif and leucine zipper containing kinase AZK; Mitogen-activated protein kinase kinase kinase MLT [Source:UniProtKB/Swiss-Prot;Acc:Q9NYL2]; Salzman2013 ANNOTATED, CDS, coding, INTERNAL, OVCODE, OVERLAPTX, OVEXON best transcript NM_133646; Salzman2013 ANNOTATED, CDS, coding, OVCODE, OVERLAPTX, OVEXON, UTR3 best transcript NM_016653; Salzman2013 ANNOTATED, CDS, coding, OVCODE, OVERLAPTX, OVEXON, UTR3 best transcript NM_133646; Salzman2013 ANNOTATED, CDS, coding, INTERNAL, OVCODE, OVERLAPTX, OVEXON best transcript NM_016653; Transcript Identified by AceView, Entrez Gene ID(s) 51776 | ZAK; pk   | 3,47 |
| chromosome X open reading frame 56                                                                                                                                                                                                                                                                                                                                                                                                                                                                                                                                                                                       | CXorf56   | 3,47 |
| integrin, alpha 2 (CD49B, alpha 2 subunit of VLA-2 receptor)                                                                                                                                                                                                                                                                                                                                                                                                                                                                                                                                                             | ITGA2     | 3,46 |
| SP100 nuclear antigen                                                                                                                                                                                                                                                                                                                                                                                                                                                                                                                                                                                                    | SP100     | 3,45 |
| NUAK family, SNF1-like kinase, 1                                                                                                                                                                                                                                                                                                                                                                                                                                                                                                                                                                                         | NUAK1     | 3,45 |
| major facilitator superfamily domain containing 11                                                                                                                                                                                                                                                                                                                                                                                                                                                                                                                                                                       | MFSD11    | 3,44 |
| pregnancy specific beta-1-glycoprotein 3                                                                                                                                                                                                                                                                                                                                                                                                                                                                                                                                                                                 | PSG3      | 3,44 |
| centromere protein W                                                                                                                                                                                                                                                                                                                                                                                                                                                                                                                                                                                                     | CENPW     | 3,43 |
| FIG4 phosphoinositide 5-phosphatase                                                                                                                                                                                                                                                                                                                                                                                                                                                                                                                                                                                      | FIG4      | 3,43 |
| RAB27A, member RAS oncogene family                                                                                                                                                                                                                                                                                                                                                                                                                                                                                                                                                                                       | RAB27A    | 3,43 |
| pregnancy specific beta-1-glycoprotein 4                                                                                                                                                                                                                                                                                                                                                                                                                                                                                                                                                                                 | PSG4      | 3,43 |
| protein phosphatase 1, regulatory (inhibitor) subunit 11                                                                                                                                                                                                                                                                                                                                                                                                                                                                                                                                                                 | PPP1R11   | 3,43 |
| alpha kinase 2                                                                                                                                                                                                                                                                                                                                                                                                                                                                                                                                                                                                           | ALPK2     | 3,42 |
| myocyte enhancer factor 2D                                                                                                                                                                                                                                                                                                                                                                                                                                                                                                                                                                                               | MEF2D     | 3,42 |
| solute carrier family 20 (phosphate transporter), member 1                                                                                                                                                                                                                                                                                                                                                                                                                                                                                                                                                               | SLC20A1   | 3,42 |
| t-complex 11, testis-specific-like 2                                                                                                                                                                                                                                                                                                                                                                                                                                                                                                                                                                                     | TCP11L2   | 3,41 |

|                                                                                           |                 |      |
|-------------------------------------------------------------------------------------------|-----------------|------|
| caprin family member 2                                                                    | CAPRIN2         | 3,40 |
| versican                                                                                  | VCAN            | 3,40 |
| PTPRF interacting protein, binding protein 1 (liprin beta 1)                              | PPFIBP1         | 3,40 |
| Rho GTPase activating protein 5                                                           | ARHGAP5         | 3,40 |
| Kruppel-like factor 6                                                                     | KLF6            | 3,38 |
| DBF4 zinc finger B                                                                        | DBF4B           | 3,38 |
| synovial sarcoma, X breakpoint 2; synovial sarcoma, X breakpoint 2B                       | SSX2; SSX2B     | 3,38 |
| paraneoplastic Ma antigen 1                                                               | PNMA1           | 3,38 |
| ring finger protein 14                                                                    | RNF14           | 3,37 |
| AT rich interactive domain 3B (BRIGHT-like)                                               | ARID3B          | 3,37 |
| matrix-remodelling associated 7                                                           | MXRA7           | 3,37 |
| Kruppel-like factor 7 (ubiquitous)                                                        | KLF7            | 3,37 |
| membrane protein, palmitoylated 1                                                         | MPP1            | 3,36 |
| arachidonate lipoxygenase 3                                                               | ALOXE3          | 3,36 |
| sorting nexin 24                                                                          | SNX24           | 3,35 |
| transmembrane protein 99                                                                  | TMEM99          | 3,35 |
| vacuolar protein sorting 37 homolog B ( <i>S. cerevisiae</i> )                            | VPS37B          | 3,35 |
| high mobility group AT-hook 1                                                             | HMGA1           | 3,35 |
| cadherin 1, type 1                                                                        | CDH1            | 3,35 |
| vesicle associated membrane protein 5                                                     | VAMP5           | 3,34 |
| family with sequence similarity 219, member A                                             | FAM219A         | 3,34 |
| tubulointerstitial nephritis antigen-like 1                                               | TINAGL1         | 3,34 |
| matrix-remodelling associated 8                                                           | MXRA8           | 3,33 |
| solute carrier family 35, member F2                                                       | SLC35F2         | 3,33 |
| lysophosphatidylcholine acyltransferase 2                                                 | LPCAT2          | 3,33 |
| KIAA0196                                                                                  | KIAA0196        | 3,33 |
| Fas cell surface death receptor                                                           | FAS             | 3,33 |
| calpastatin                                                                               | CAST            | 3,32 |
| leucine rich repeat containing 8 family, member B                                         | LRRC8B          | 3,31 |
| ELOVL fatty acid elongase 1; microRNA 6734                                                | ELOVL1; MIR6734 | 3,30 |
| phosphoprotein enriched in astrocytes 15                                                  | PEA15           | 3,30 |
| smoothelin                                                                                | SMTN            | 3,30 |
| FYVE, RhoGEF and PH domain containing 6                                                   | FGD6            | 3,30 |
| receptor-interacting serine-threonine kinase 2                                            | RIPK2           | 3,30 |
| myosin light chain 9                                                                      | MYL9            | 3,29 |
| tripartite motif containing 21                                                            | TRIM21          | 3,28 |
| VPS11, CORVET/HOPS core subunit [Source:HGNC Symbol;Acc:HGNC:14583]                       | VPS11           | 3,28 |
| solute carrier family 25, member 51                                                       | SLC25A51        | 3,28 |
| ataxin 7-like 1                                                                           | ATXN7L1         | 3,28 |
| Salzman2013 ALT_ACCEPTOR, ALT_DONOR, coding, INTERNAL, intronic best transcript NM_152740 | HIBADH          | 3,26 |
| flavin adenine dinucleotide synthetase 1                                                  | FLAD1           | 3,26 |

|                                                                                            |                     |      |
|--------------------------------------------------------------------------------------------|---------------------|------|
| actin related protein 2/3 complex subunit 4                                                | ARPC4               | 3,26 |
| zinc finger protein 554                                                                    | ZNF554              | 3,26 |
| human immunodeficiency virus type I enhancer binding protein 2                             | HIVEP2              | 3,25 |
| family with sequence similarity 155, member B                                              | FAM155B             | 3,25 |
| family with sequence similarity 49, member A                                               | FAM49A              | 3,24 |
| FYN proto-oncogene, Src family tyrosine kinase                                             | FYN                 | 3,23 |
| proline-serine-threonine phosphatase interacting protein 2                                 | PSTPIP2             | 3,23 |
| tetraspanin 4                                                                              | TSPAN4              | 3,23 |
| RUN domain and cysteine-rich domain containing, Beclin 1-interacting protein; microRNA 922 | RUBCN; MIR922       | 3,23 |
| microtubule-associated protein 1 light chain 3 beta                                        | MAP1LC3B            | 3,23 |
| galactosidase, alpha                                                                       | GLA                 | 3,21 |
| major facilitator superfamily domain containing 12                                         | MFSD12              | 3,21 |
| golgin A8 family, member F; golgin A8 family, member G                                     | GOLGA8F;<br>GOLGA8G | 3,21 |
| Rho/Rac guanine nucleotide exchange factor 18                                              | ARHGEF18            | 3,20 |
| family with sequence similarity 214, member B                                              | FAM214B             | 3,20 |
| ribonuclease P/MRP 30kDa subunit                                                           | RPP30               | 3,19 |
| kinesin light chain 1                                                                      | KLC1                | 3,19 |
| SRY box 4                                                                                  | SOX4                | 3,18 |
| discs, large homolog 4 (Drosophila)                                                        | DLG4                | 3,18 |
| myosin binding protein H                                                                   | MYBPH               | 3,18 |
| TAF12 RNA polymerase II, TATA box binding protein (TBP)-associated factor, 20kDa           | TAF12               | 3,18 |
| TBC/LysM-associated domain containing 2                                                    | TLDC2               | 3,18 |
| major facilitator superfamily domain containing 1                                          | MFSD1               | 3,18 |
| F-box protein 30                                                                           | FBXO30              | 3,18 |
| Myb/SANT-like DNA-binding domain containing 3                                              | MSANTD3             | 3,17 |
| POC5 centriolar protein                                                                    | POC5                | 3,17 |
| WD repeat domain 44                                                                        | WDR44               | 3,17 |
| transport and golgi organization 2 homolog                                                 | TANGO2              | 3,17 |
| kinesin family member 3C                                                                   | KIF3C               | 3,17 |
| Sad1 and UNC84 domain containing 3                                                         | SUN3                | 3,17 |
| gametocyte specific factor 1                                                               | GTSF1               | 3,16 |
| Ras-related GTP binding C                                                                  | RRAGC               | 3,16 |
| notch 2                                                                                    | NOTCH2              | 3,16 |
| formin like 1                                                                              | FMNL1               | 3,16 |
| complexin 2                                                                                | CPLX2               | 3,15 |
| zyxin                                                                                      | ZYX                 | 3,15 |
| GRB2-associated binding protein 2                                                          | GAB2                | 3,15 |
| bone morphogenetic protein 1                                                               | BMP1                | 3,14 |
| microtubule-associated protein, RP/EB family, member 3                                     | MAPRE3              | 3,14 |



|                                                                                                     |                                           |      |
|-----------------------------------------------------------------------------------------------------|-------------------------------------------|------|
| polycystic kidney disease 1-like 2 (gene/pseudogene)                                                | PKD1L2                                    | 3,14 |
| tetratricopeptide repeat domain 39A                                                                 | TTC39A                                    | 3,14 |
| solute carrier family 35, member F6                                                                 | SLC35F6                                   | 3,13 |
| KIAA0430; microRNA 6506                                                                             | KIAA0430;<br>MIR6506                      | 3,13 |
| ubiquitin C-terminal hydrolase L3                                                                   | UCHL3                                     | 3,12 |
| phospholipid scramblase 3; transmembrane protein 256;<br>TMEM256-PLSCR3 readthrough (NMD candidate) | PLSCR3;<br>TMEM256;<br>TMEM256-<br>PLSCR3 | 3,12 |
| phospholipase B1                                                                                    | PLB1                                      | 3,12 |
| NLR family, pyrin domain containing 10                                                              | NLRP10                                    | 3,12 |
| zinc finger, AN1-type domain 2A                                                                     | ZFAND2A                                   | 3,12 |
| general transcription factor IIH subunit 1                                                          | GTF2H1                                    | 3,12 |
| tribbles pseudokinase 1                                                                             | TRIB1                                     | 3,10 |
| platelet endothelial aggregation receptor 1                                                         | PEAR1                                     | 3,10 |
| IQ motif containing GTPase activating protein 1                                                     | IQGAP1                                    | 3,10 |
| zinc finger protein 83                                                                              | ZNF83                                     | 3,10 |
| GTP binding protein overexpressed in skeletal muscle                                                | GEM                                       | 3,10 |
| coiled-coil domain containing 109B                                                                  | CCDC109B                                  | 3,09 |
| tsukushi, small leucine rich proteoglycan                                                           | TSKU                                      | 3,09 |
| ArfGAP with SH3 domain, ankyrin repeat and PH domain<br>1; ASAP1 intronic transcript 2              | ASAP1; ASAP1-IT2                          | 3,09 |
| S100 calcium binding protein A14                                                                    | S100A14                                   | 3,09 |
| SMAD specific E3 ubiquitin protein ligase 2                                                         | SMURF2                                    | 3,08 |
| Transcript Identified by AceView, Entrez Gene ID(s) 8878                                            | SQSTM1                                    | 3,08 |
| monoamine oxidase A                                                                                 | MAOA                                      | 3,08 |
| solute carrier family 26 (anion exchanger), member 9                                                | SLC26A9                                   | 3,08 |
| BRISC and BRCA1 A complex member 1                                                                  | BABAM1                                    | 3,08 |
| cyclin E2                                                                                           | CCNE2                                     | 3,07 |
| discs, large (Drosophila) homolog-associated protein 4                                              | DLGAP4                                    | 3,06 |
| syntaxin 1A (brain)                                                                                 | STX1A                                     | 3,06 |
| ATP binding cassette subfamily C member 1                                                           | ABCC1                                     | 3,06 |
| phospholipase A2, group IID                                                                         | PLA2G2D                                   | 3,06 |
| tumor necrosis factor, alpha-induced protein 8                                                      | TNFAIP8                                   | 3,05 |
| VPS18 CORVET/HOPS core subunit                                                                      | VPS18                                     | 3,05 |
| ARPC4-TTL3 readthrough                                                                              | ARPC4-TTL3                                | 3,04 |
| SPRY domain containing 3                                                                            | SPRYD3                                    | 3,04 |
| SLX4 interacting protein                                                                            | SLX4IP                                    | 3,03 |
| zinc finger, AN1-type domain 5                                                                      | ZFAND5                                    | 3,03 |
| golgi membrane protein 1                                                                            | GOLM1                                     | 3,03 |
| growth arrest and DNA-damage-inducible, beta                                                        | GADD45B                                   | 3,03 |
| calcium channel, voltage-dependent, alpha 2/delta<br>subunit 4                                      | CACNA2D4                                  | 3,03 |

|                                                                                                                                          |                           |      |
|------------------------------------------------------------------------------------------------------------------------------------------|---------------------------|------|
| protein phosphatase 2, regulatory subunit B, alpha                                                                                       | PPP2R3A                   | 3,03 |
| RAS, dexamethasone-induced 1                                                                                                             | RASD1                     | 3,02 |
| deafness, autosomal dominant 5                                                                                                           | DFNA5                     | 3,02 |
| B-cell CLL/lymphoma 9                                                                                                                    | BCL9                      | 3,02 |
| CCDC144NL antisense RNA 1                                                                                                                | CCDC144NL-AS1             | 3,02 |
| anti-Mullerian hormone receptor, type II                                                                                                 | AMHR2                     | 3,02 |
| cancer/testis antigen family 45, member A1                                                                                               | CT45A1                    | 3,01 |
| radixin                                                                                                                                  | RDX                       | 3,01 |
| deoxyribonuclease I-like 1                                                                                                               | DNASE1L1                  | 3,01 |
| malic enzyme 2, NAD(+)-dependent, mitochondrial                                                                                          | ME2                       | 3,00 |
| axin 2                                                                                                                                   | AXIN2                     | 3,00 |
| mediator complex subunit 15                                                                                                              | MED15                     | 3,00 |
| pleckstrin homology domain containing, family A member 6                                                                                 | PLEKHA6                   | 3,00 |
| heparan sulfate proteoglycan 2                                                                                                           | HSPG2                     | 2,99 |
| GDP dissociation inhibitor 1                                                                                                             | GDI1                      | 2,99 |
| Ras-related GTP binding D                                                                                                                | RRAGD                     | 2,99 |
| RAD18 E3 ubiquitin protein ligase                                                                                                        | RAD18                     | 2,99 |
| endoglin                                                                                                                                 | ENG                       | 2,99 |
| supervillin                                                                                                                              | SVIL                      | 2,98 |
| golgin A8 family, member G                                                                                                               | GOLGA8G                   | 2,98 |
| SHC (Src homology 2 domain containing) transforming protein 1                                                                            | SHC1                      | 2,98 |
| tubulin, beta 2A class IIa                                                                                                               | TUBB2A                    | 2,97 |
| retinol binding protein 5, cellular                                                                                                      | RBP5                      | 2,97 |
| distal-less homeobox 1                                                                                                                   | DLX1                      | 2,97 |
| VPS11, CORVET/HOPS core subunit [Source:HGNC Symbol;Acc:HGNC:14583]                                                                      | VPS11                     | 2,96 |
| cancer/testis antigen family 45, member A3;<br>cancer/testis antigen family 45, member A4;<br>cancer/testis antigen family 45, member A5 | CT45A3; CT45A4;<br>CT45A5 | 2,95 |
| PR domain containing 7                                                                                                                   | PRDM7                     | 2,94 |
| striatin interacting protein 2                                                                                                           | STRIP2                    | 2,94 |
| plasminogen activator, urokinase                                                                                                         | PLAU                      | 2,93 |
| transmembrane protein 138                                                                                                                | TMEM138                   | 2,93 |
| CKLF-like MARVEL transmembrane domain containing 3                                                                                       | CMTM3                     | 2,93 |
| exocyst complex component 1                                                                                                              | EXOC1                     | 2,93 |
| phosphodiesterase 11A                                                                                                                    | PDE11A                    | 2,93 |
| pleckstrin homology domain containing, family M, member 3                                                                                | PLEKHM3                   | 2,93 |
| ABL proto-oncogene 2, non-receptor tyrosine kinase                                                                                       | ABL2                      | 2,92 |
| suppressor of cytokine signaling 4                                                                                                       | SOCS4                     | 2,92 |
| long intergenic non-protein coding RNA 1599                                                                                              | LINC01599                 | 2,92 |
| anoctamin 10                                                                                                                             | ANO10                     | 2,91 |
| golgin A7                                                                                                                                | GOLGA7                    | 2,91 |

|                                                                                                                 |                       |      |
|-----------------------------------------------------------------------------------------------------------------|-----------------------|------|
| THAP9 antisense RNA 1                                                                                           | THAP9-AS1             | 2,91 |
| nuclear envelope integral membrane protein 1                                                                    | NEMP1                 | 2,91 |
| guanine nucleotide binding protein (G protein), gamma 12                                                        | GNG12                 | 2,91 |
| TBC1 domain family, member 19                                                                                   | TBC1D19               | 2,91 |
| opioid growth factor receptor-like 1                                                                            | OGFRL1                | 2,91 |
| ectonucleoside triphosphate diphosphohydrolase 3                                                                | ENTPD3                | 2,90 |
| enolase 2 (gamma, neuronal)                                                                                     | ENO2                  | 2,90 |
| cold shock domain containing C2, RNA binding                                                                    | CSDC2                 | 2,90 |
| metallothionein 1E                                                                                              | MT1E                  | 2,90 |
| alkaline ceramidase 2                                                                                           | ACER2                 | 2,89 |
| carnitine palmitoyltransferase 1A (liver)                                                                       | CPT1A                 | 2,89 |
| solute carrier family 30 (zinc transporter), member 1                                                           | SLC30A1               | 2,88 |
| chromosome 12 open reading frame 4                                                                              | C12orf4               | 2,88 |
| pleckstrin homology domain containing, family B (evectins) member 2                                             | PLEKHB2               | 2,88 |
| chromosome 15 open reading frame 41                                                                             | C15orf41              | 2,87 |
| cyclin J-like                                                                                                   | CCNJL                 | 2,87 |
| F-box and leucine-rich repeat protein 5                                                                         | FBXL5                 | 2,87 |
| chromosome 1 open reading frame 94                                                                              | C1orf94               | 2,87 |
| fidgetin-like 1                                                                                                 | FIGNL1                | 2,87 |
| zinc finger protein 562                                                                                         | ZNF562                | 2,87 |
| BCL2-like 13 (apoptosis facilitator)                                                                            | BCL2L13               | 2,86 |
| tetraspanin 31                                                                                                  | TSPAN31               | 2,86 |
| microsomal glutathione S-transferase 1                                                                          | MGST1                 | 2,86 |
| myotubularin related protein 14                                                                                 | MTMR14                | 2,86 |
| metallothionein 1G                                                                                              | MT1G                  | 2,85 |
| THAP domain containing, apoptosis associated protein 1                                                          | THAP1                 | 2,85 |
| DnaJ (Hsp40) homolog, subfamily B, member 2                                                                     | DNAJB2                | 2,85 |
| Rho/Rac guanine nucleotide exchange factor 2                                                                    | ARHGEF2               | 2,84 |
| CD63 molecule                                                                                                   | CD63                  | 2,84 |
| arsA arsenite transporter, ATP-binding, homolog 1 (bacterial)                                                   | ASNA1                 | 2,84 |
| autophagy related 2A                                                                                            | ATG2A                 | 2,84 |
| receptor accessory protein 2                                                                                    | REEP2                 | 2,83 |
| ubiquitin specific peptidase 17-like family member 26;<br>ubiquitin specific peptidase 17-like family member 24 | USP17L26;<br>USP17L24 | 2,83 |
| ras homolog family member Q                                                                                     | RHOQ                  | 2,83 |
| LIM and cysteine-rich domains 1; long intergenic non-protein coding RNA 312                                     | LMCD1;<br>LINC00312   | 2,82 |
| phospholipase A1 member A                                                                                       | PLA1A                 | 2,82 |
| pregnancy specific beta-1-glycoprotein 11                                                                       | PSG11                 | 2,81 |
| zinc finger protein 528                                                                                         | ZNF528                | 2,81 |
| cysteine rich hydrophobic domain 2                                                                              | CHIC2                 | 2,81 |
| proteasome 26S subunit, non-ATPase 2                                                                            | PSMD2                 | 2,81 |

|                                                                                                                                                                                                                                                                                                                                                                                                                                                                                                                                  |                              |      |
|----------------------------------------------------------------------------------------------------------------------------------------------------------------------------------------------------------------------------------------------------------------------------------------------------------------------------------------------------------------------------------------------------------------------------------------------------------------------------------------------------------------------------------|------------------------------|------|
| ubiquitin specific peptidase 53                                                                                                                                                                                                                                                                                                                                                                                                                                                                                                  | USP53                        | 2,81 |
| dual specificity phosphatase 13                                                                                                                                                                                                                                                                                                                                                                                                                                                                                                  | DUSP13                       | 2,80 |
| sulfatase modifying factor 2                                                                                                                                                                                                                                                                                                                                                                                                                                                                                                     | SUMF2                        | 2,80 |
| nocturnin                                                                                                                                                                                                                                                                                                                                                                                                                                                                                                                        | NOCT                         | 2,80 |
| zinc finger protein 432                                                                                                                                                                                                                                                                                                                                                                                                                                                                                                          | ZNF432                       | 2,79 |
| family with sequence similarity 127, member A                                                                                                                                                                                                                                                                                                                                                                                                                                                                                    | FAM127A                      | 2,79 |
| late cornified envelope 2B                                                                                                                                                                                                                                                                                                                                                                                                                                                                                                       | LCE2B                        | 2,79 |
| parathyroid hormone-like hormone                                                                                                                                                                                                                                                                                                                                                                                                                                                                                                 | PTH1H                        | 2,79 |
| chromosome 17 open reading frame 53                                                                                                                                                                                                                                                                                                                                                                                                                                                                                              | C17orf53                     | 2,79 |
| synovial sarcoma, X breakpoint 2B                                                                                                                                                                                                                                                                                                                                                                                                                                                                                                | SSX2B                        | 2,78 |
| vitamin D (1,25- dihydroxyvitamin D3) receptor                                                                                                                                                                                                                                                                                                                                                                                                                                                                                   | VDR                          | 2,78 |
| shisa family member 4                                                                                                                                                                                                                                                                                                                                                                                                                                                                                                            | SHISA4                       | 2,78 |
| BTG family, member 3                                                                                                                                                                                                                                                                                                                                                                                                                                                                                                             | BTG3                         | 2,78 |
| serine/threonine kinase 33                                                                                                                                                                                                                                                                                                                                                                                                                                                                                                       | STK33                        | 2,78 |
| tectorin beta                                                                                                                                                                                                                                                                                                                                                                                                                                                                                                                    | TECTB                        | 2,77 |
| megakaryoblastic leukemia (translocation) 1                                                                                                                                                                                                                                                                                                                                                                                                                                                                                      | MKL1                         | 2,77 |
| lymphotoxin beta receptor (TNFR superfamily, member 3)                                                                                                                                                                                                                                                                                                                                                                                                                                                                           | LTBR                         | 2,77 |
| cancer/testis antigen family 45, member A10                                                                                                                                                                                                                                                                                                                                                                                                                                                                                      | CT45A10                      | 2,77 |
| thyroid hormone receptor interactor 13                                                                                                                                                                                                                                                                                                                                                                                                                                                                                           | TRIP13                       | 2,76 |
| cyclin A1                                                                                                                                                                                                                                                                                                                                                                                                                                                                                                                        | CCNA1                        | 2,76 |
| vaccinia related kinase 3                                                                                                                                                                                                                                                                                                                                                                                                                                                                                                        | VRK3                         | 2,76 |
| ADAM metallopeptidase with thrombospondin type 1 motif 2                                                                                                                                                                                                                                                                                                                                                                                                                                                                         | ADAMTS2                      | 2,76 |
| fascin actin-bundling protein 1                                                                                                                                                                                                                                                                                                                                                                                                                                                                                                  | FSCN1                        | 2,76 |
| integrin beta 4                                                                                                                                                                                                                                                                                                                                                                                                                                                                                                                  | ITGB4                        | 2,76 |
| sorting nexin 29                                                                                                                                                                                                                                                                                                                                                                                                                                                                                                                 | SNX29                        | 2,75 |
| ATPase, aminophospholipid transporter, class I, type 8B, member 3                                                                                                                                                                                                                                                                                                                                                                                                                                                                | ATP8B3                       | 2,75 |
| exonuclease NEF-sp; Putative RNA exonuclease NEF-sp [Source:UniProtKB/Swiss-Prot;Acc:Q96IC2]; Salzman2013 ANNOTATED, CDS, coding, OVCODE, OVERLAPTX, OVEXON, UTR3, UTR5 best transcript NM_001199053; Salzman2013 ANNOTATED, CDS, coding, INTERNAL, OVCODE, OVERLAPTX, OVEXON best transcript NM_001199053; Salzman2013 ANNOTATED, CDS, coding, OVCODE, OVERLAPTX, OVEXON, UTR3 best transcript NM_001199053; Transcript Identified by AceView, Entrez Gene ID(s) 81691; U4atac minor spliceosomal RNA [Source:RFAM;Acc:RF00618] | LOC81691; AC004381.6; U4atac | 2,75 |
| cystinosin, lysosomal cystine transporter                                                                                                                                                                                                                                                                                                                                                                                                                                                                                        | CTNS                         | 2,74 |
| BCL2-associated athanogene 3                                                                                                                                                                                                                                                                                                                                                                                                                                                                                                     | BAG3                         | 2,74 |
| porcupine homolog (Drosophila)                                                                                                                                                                                                                                                                                                                                                                                                                                                                                                   | PORCN                        | 2,74 |
| desmin                                                                                                                                                                                                                                                                                                                                                                                                                                                                                                                           | DES                          | 2,74 |
| cysteine-rich protein 1 (intestinal)                                                                                                                                                                                                                                                                                                                                                                                                                                                                                             | CRIP1                        | 2,74 |

|                                                                                         |                              |      |
|-----------------------------------------------------------------------------------------|------------------------------|------|
| cytochrome P450, family 11, subfamily A, polypeptide 1                                  | CYP11A1                      | 2,74 |
| zinc finger, NFX1-type containing 1                                                     | ZNFX1                        | 2,74 |
| BTB (POZ) domain containing 9                                                           | BTBD9                        | 2,74 |
| polymerase (RNA) II (DNA directed) polypeptide L, 7.6kDa                                | POLR2L                       | 2,73 |
| ring finger protein 141                                                                 | RNF141                       | 2,73 |
| PR domain containing 4                                                                  | PRDM4                        | 2,73 |
| protein tyrosine phosphatase, non-receptor type 21                                      | PTPN21                       | 2,73 |
| fumarylacetoacetate hydrolase (fumarylacetoacetase)                                     | FAH                          | 2,73 |
| metallothionein 1L (gene/pseudogene)                                                    | MT1L                         | 2,72 |
| G-protein signaling modulator 3                                                         | GPSM3                        | 2,72 |
| syndecan 3                                                                              | SDC3                         | 2,72 |
| BLOC-1 related complex subunit 8; myocyte enhancer factor 2B; MEF2BNB-MEF2B readthrough | BORCS8; MEF2B; MEF2BNB-MEF2B | 2,72 |
| biogenesis of lysosomal organelles complex-1, subunit 2                                 | BLOC1S2                      | 2,72 |
| S100 calcium binding protein P                                                          | S100P                        | 2,72 |
| ADP-ribosylation factor like GTPase 8B                                                  | ARL8B                        | 2,72 |
| hexosaminidase B (beta polypeptide)                                                     | HEXB                         | 2,72 |
| centrosomal protein 55kDa                                                               | CEP55                        | 2,71 |
| maestro heat-like repeat family member 1                                                | MROH1                        | 2,71 |
| GTF2I repeat domain containing 1                                                        | GTF2IRD1                     | 2,71 |
| ras homolog family member F (in filopodia)                                              | RHOF                         | 2,71 |
| Ras protein-specific guanine nucleotide-releasing factor 2                              | RASGRF2                      | 2,71 |
| microtubule interacting and trafficking domain containing 1                             | MITD1                        | 2,70 |
| N-terminal asparagine amidase                                                           | NTAN1                        | 2,70 |
| proline rich 13                                                                         | PRR13                        | 2,70 |
| plexin A2                                                                               | PLXNA2                       | 2,70 |
| annexin A11                                                                             | ANXA11                       | 2,70 |
| protein tyrosine phosphatase, non-receptor type 14                                      | PTPN14                       | 2,70 |
| solute carrier family 25 (mitochondrial carrier), member 16                             | SLC25A16                     | 2,70 |
| long intergenic non-protein coding RNA 598                                              | LINC00598                    | 2,70 |
| B-cell CLL/lymphoma 10                                                                  | BCL10                        | 2,70 |
| cystatin A (stefin A)                                                                   | CSTA                         | 2,70 |
| NADH dehydrogenase (ubiquinone) complex I, assembly factor 1                            | NDUFAF1                      | 2,69 |
| echinoderm microtubule associated protein like 2; microRNA 330                          | EML2; MIR330                 | 2,69 |
| ER membrane protein complex subunit 3                                                   | EMC3                         | 2,69 |
| keratin associated protein 1-1                                                          | KRTAP1-1                     | 2,69 |
| heat shock 27kDa protein 1                                                              | HSPB1                        | 2,69 |

|                                                                                                                 |                       |      |
|-----------------------------------------------------------------------------------------------------------------|-----------------------|------|
| inhibitor of DNA binding 3, dominant negative helix-loop-helix protein                                          | ID3                   | 2,69 |
| ATP binding cassette subfamily A member 12                                                                      | ABCA12                | 2,69 |
| coagulation factor II (thrombin) receptor-like 2                                                                | F2RL2                 | 2,69 |
| tubulin tyrosine ligase-like family member 3                                                                    | TTLL3                 | 2,69 |
| PDZ domain containing 11                                                                                        | PDZD11                | 2,69 |
| KIAA1551                                                                                                        | KIAA1551              | 2,68 |
| nuclear receptor 2C2-associated protein                                                                         | NR2C2AP               | 2,67 |
| notch 2 N-terminal like                                                                                         | NOTCH2NL              | 2,67 |
| antagonist of mitotic exit network 1 homolog                                                                    | AMN1                  | 2,67 |
| sphingomyelin phosphodiesterase, acid-like 3A                                                                   | SMPDL3A               | 2,67 |
| solute carrier family 7 (anionic amino acid transporter light chain, xc- system), member 11                     | SLC7A11               | 2,66 |
| endogenous retrovirus group V, member 2                                                                         | ERVV-2                | 2,66 |
| BMP2 inducible kinase                                                                                           | BMP2K                 | 2,66 |
| reticulon 4                                                                                                     | RTN4                  | 2,66 |
| UDP-N-acetylglucosamine pyrophosphorylase 1 like 1                                                              | UAP1L1                | 2,65 |
| zinc finger, MIZ-type containing 2                                                                              | ZMIZ2                 | 2,65 |
| matrix metalloproteinase 10                                                                                     | MMP10                 | 2,65 |
| cadherin 17, LI cadherin (liver-intestine)                                                                      | CDH17                 | 2,65 |
| TNF receptor-associated factor 1                                                                                | TRAF1                 | 2,65 |
| Transcript Identified by AceView, Entrez Gene ID(s) 1174                                                        | AP1S1                 | 2,65 |
| interferon regulatory factor 9                                                                                  | IRF9                  | 2,63 |
| growth arrest and DNA-damage-inducible, alpha                                                                   | GADD45A               | 2,63 |
| SH3-domain kinase binding protein 1                                                                             | SH3KBP1               | 2,63 |
| solute carrier family 22 (organic cation transporter), member 18 antisense                                      | SLC22A18AS            | 2,63 |
| RAB10, member RAS oncogene family                                                                               | RAB10                 | 2,63 |
| PSMC3 interacting protein                                                                                       | PSMC3IP               | 2,63 |
| ubiquitin specific peptidase 17-like family member 18;<br>ubiquitin specific peptidase 17-like family member 11 | USP17L18;<br>USP17L11 | 2,63 |
| Shwachman-Bodian-Diamond syndrome                                                                               | SBDS                  | 2,63 |
| neuropilin (NRP) and tolloid (TLL)-like 2                                                                       | NETO2                 | 2,62 |
| mannose-6-phosphate receptor (cation dependent)                                                                 | M6PR                  | 2,62 |
| calpastatin                                                                                                     | CAST                  | 2,62 |
| 5-nucleotidase domain containing 3                                                                              | NT5DC3                | 2,62 |
| gastric inhibitory polypeptide                                                                                  | GIP                   | 2,62 |
| Ras association (RalGDS/AF-6) domain family member 5                                                            | RASSF5                | 2,61 |
| intraflagellar transport 22                                                                                     | IFT22                 | 2,61 |
| RAP1 GTPase activating protein 2                                                                                | RAP1GAP2              | 2,61 |
| mitochondrial ribosomal protein L24                                                                             | MRPL24                | 2,60 |
| WD repeat domain 47                                                                                             | WDR47                 | 2,60 |

|                                                                                                                 |                       |      |
|-----------------------------------------------------------------------------------------------------------------|-----------------------|------|
| neurexophilin and PC-esterase domain family, member 3                                                           | NXPE3                 | 2,60 |
| CDC42 effector protein (Rho GTPase binding) 2                                                                   | CDC42EP2              | 2,60 |
| WAP four-disulfide core domain 3                                                                                | WFDC3                 | 2,60 |
| apoptosis antagonizing transcription factor                                                                     | AATF                  | 2,60 |
| STE20-related kinase adaptor alpha                                                                              | STRADA                | 2,60 |
| solute carrier family 9, subfamily A (NHE8, cation proton antiporter 8), member 8                               | SLC9A8                | 2,60 |
| formin 1                                                                                                        | FMN1                  | 2,59 |
| coiled-coil and C2 domain containing 1B                                                                         | CC2D1B                | 2,59 |
| calpain 5                                                                                                       | CAPN5                 | 2,59 |
| extended synaptotagmin-like protein 1                                                                           | ESYT1                 | 2,59 |
| transmembrane protein 55A                                                                                       | TMEM55A               | 2,59 |
| Josephin domain containing 1                                                                                    | JOSD1                 | 2,59 |
| polymerase (RNA) III (DNA directed) polypeptide G (32kD)                                                        | POLR3G                | 2,59 |
| phosphopantothenoylcysteine decarboxylase                                                                       | PPCDC                 | 2,58 |
| LIM domain kinase 1                                                                                             | LIMK1                 | 2,58 |
| acyl-CoA dehydrogenase, very long chain                                                                         | ACADVL                | 2,58 |
| ST3 beta-galactoside alpha-2,3-sialyltransferase 4                                                              | ST3GAL4               | 2,58 |
| retinol dehydrogenase 12 (all-trans/9-cis/11-cis)                                                               | RDH12                 | 2,58 |
| collagen, type I, alpha 1                                                                                       | COL1A1                | 2,58 |
| RNA binding motif protein 18                                                                                    | RBM18                 | 2,57 |
| CSAG family, member 3                                                                                           | CSAG3                 | 2,57 |
| solute carrier family 2 (facilitated glucose transporter), member 8                                             | SLC2A8                | 2,57 |
| drebrin-like; microRNA 6837                                                                                     | DBNL; MIR6837         | 2,57 |
| TSC22 domain family, member 2                                                                                   | TSC22D2               | 2,57 |
| meiotic double-stranded break formation protein 1                                                               | MEI1                  | 2,56 |
| adaptor-related protein complex 2, beta 1 subunit                                                               | AP2B1                 | 2,56 |
| cysteine-rich transmembrane module containing 1                                                                 | CYSTM1                | 2,56 |
| S100 calcium binding protein A4                                                                                 | S100A4                | 2,56 |
| phospholipase C, beta 1 (phosphoinositide-specific)                                                             | PLCB1                 | 2,56 |
| ubiquitin specific peptidase 17-like family member 22;<br>ubiquitin specific peptidase 17-like family member 20 | USP17L22;<br>USP17L20 | 2,56 |
| protein kinase, cAMP-dependent, regulatory, type I, alpha;<br>arylsulfatase G                                   | PRKAR1A; ARSG         | 2,56 |
| KIAA0922                                                                                                        | KIAA0922              | 2,56 |
| pitrilysin metallopeptidase 1                                                                                   | PITRM1                | 2,56 |
| cancer/testis antigen family 45, member A2                                                                      | CT45A2                | 2,56 |
| paralemmin 2                                                                                                    | PALM2                 | 2,55 |
| cancer/testis antigen family 45, member A8                                                                      | CT45A8                | 2,55 |
| cancer/testis antigen family 45, member A9                                                                      | CT45A9                | 2,55 |
| ATPase, Ca++ transporting, type 2C, member 1                                                                    | ATP2C1                | 2,55 |
| REST corepressor 1                                                                                              | RCOR1                 | 2,55 |

|                                                                                                                                                                       |                                       |      |
|-----------------------------------------------------------------------------------------------------------------------------------------------------------------------|---------------------------------------|------|
| glutathione peroxidase 1                                                                                                                                              | GPX1                                  | 2,55 |
| NMDA receptor synaptonuclear signaling and neuronal migration factor; microRNA 7114                                                                                   | NSMF; MIR7114                         | 2,54 |
| latent transforming growth factor beta binding protein 4                                                                                                              | LTBP4                                 | 2,54 |
| SMAD family member 3                                                                                                                                                  | SMAD3                                 | 2,54 |
| RNA terminal phosphate cyclase-like 1                                                                                                                                 | RCL1                                  | 2,54 |
| ATP binding cassette subfamily C member 2                                                                                                                             | ABCC2                                 | 2,54 |
| pregnancy-associated plasma protein A, pappalysin 1                                                                                                                   | PAPPA                                 | 2,54 |
| zinc finger CCCH-type containing 12C                                                                                                                                  | ZC3H12C                               | 2,53 |
| late endosomal/lysosomal adaptor, MAPK and MTOR activator 3                                                                                                           | LAMTOR3                               | 2,53 |
| centrosomal protein 135kDa                                                                                                                                            | CEP135                                | 2,53 |
| X-ray repair complementing defective repair in Chinese hamster cells 4                                                                                                | XRCC4                                 | 2,53 |
| CREB regulated transcription coactivator 2                                                                                                                            | CRTC2                                 | 2,53 |
| CD58 molecule                                                                                                                                                         | CD58                                  | 2,53 |
| bladder cancer associated protein                                                                                                                                     | BLCAP                                 | 2,53 |
| chitinase 3-like 1 (cartilage glycoprotein-39)                                                                                                                        | CHI3L1                                | 2,53 |
| dysbindin (dystrobrevin binding protein 1) domain containing 1                                                                                                        | DBNDD1                                | 2,52 |
| upregulator of cell proliferation                                                                                                                                     | URGCP                                 | 2,52 |
| cystatin SA                                                                                                                                                           | CST2                                  | 2,52 |
| zinc finger protein 382                                                                                                                                               | ZNF382                                | 2,52 |
| zinc finger and BTB domain containing 21                                                                                                                              | ZBTB21                                | 2,52 |
| target of myb1 like 1 membrane trafficking protein                                                                                                                    | TOM1L1                                | 2,52 |
| RNA exonuclease 2                                                                                                                                                     | REXO2                                 | 2,52 |
| ring finger protein (C3H2C3 type) 6                                                                                                                                   | RNF6                                  | 2,52 |
| immunoglobulin-like and fibronectin type III domain containing 1                                                                                                      | IGFN1                                 | 2,52 |
| Ras association (RalGDS/AF-6) domain family member 6                                                                                                                  | RASSF6                                | 2,51 |
| Homo sapiens uncharacterized LOC79999 (LOC79999), mRNA.; Homo sapiens uncharacterized protein ENSP00000382042 (LOC388436), mRNA.; novel transcript antisense to GRAPL | LOC79999;<br>LOC388436;<br>AC007952.6 | 2,51 |
| CHRNA7 (cholinergic receptor, nicotinic, alpha 7, exons 5-10) and FAM7A (family with sequence similarity 7A, exons A-E) fusion                                        | CHRFAM7A                              | 2,51 |
| monoamine oxidase B                                                                                                                                                   | MAOB                                  | 2,51 |
| ninein (GSK3B interacting protein)                                                                                                                                    | NIN                                   | 2,51 |
| Ras-like without CAAX 1                                                                                                                                               | RIT1                                  | 2,51 |
| PDZ and LIM domain 7 (enigma)                                                                                                                                         | PDLIM7                                | 2,51 |
| neural proliferation, differentiation and control, 1                                                                                                                  | NPDC1                                 | 2,51 |
| cadherin-related family member 5                                                                                                                                      | CDHR5                                 | 2,51 |



|                                                                             |             |      |
|-----------------------------------------------------------------------------|-------------|------|
| 5-aminolevulinate synthase 1                                                | ALAS1       | 2,51 |
| VPS11, CORVET/HOPS core subunit [Source:HGNC Symbol;Acc:HGNC:14583]         | VPS11       | 2,51 |
| serine/threonine kinase 4                                                   | STK4        | 2,50 |
| synovial sarcoma, X breakpoint 8                                            | SSX8        | 2,50 |
| dynactin associated protein                                                 | DYNAP       | 2,49 |
| transmembrane channel like 2                                                | TMC2        | 2,49 |
| ubiquitin specific peptidase 17-like family member 13                       | USP17L13    | 2,49 |
| metallothionein 1B; metallothionein 1C, pseudogene                          | MT1B; MT1CP | 2,49 |
| zinc finger, FYVE domain containing 1                                       | ZFYVE1      | 2,49 |
| target of myb1 like 2 membrane trafficking protein                          | TOM1L2      | 2,49 |
| long intergenic non-protein coding RNA 654                                  | LINC00654   | 2,49 |
| ceramide synthase 5                                                         | CERS5       | 2,49 |
| transmembrane protein 159                                                   | TMEM159     | 2,49 |
| UDP-Gal:betaGlcNAc beta 1,4- galactosyltransferase, polypeptide 5           | B4GALT5     | 2,48 |
| linker for activation of T-cells                                            | LAT         | 2,48 |
| calpain 11                                                                  | CAPN11      | 2,48 |
| forkhead box P1                                                             | FOXP1       | 2,48 |
| heat shock 105kDa/110kDa protein 1                                          | HSPH1       | 2,48 |
| olfactory receptor, family 51, subfamily B, member 5                        | OR51B5      | 2,48 |
| isthmin 1, angiogenesis inhibitor                                           | ISM1        | 2,48 |
| chromosome 7 open reading frame 25                                          | C7orf25     | 2,48 |
| tetra-peptide repeat homeobox-like                                          | TPRXL       | 2,47 |
| vinculin                                                                    | VCL         | 2,47 |
| FH2 domain containing 1                                                     | FHDC1       | 2,47 |
| chromosome 4 open reading frame 32                                          | C4orf32     | 2,47 |
| transmembrane protein 234                                                   | TMEM234     | 2,47 |
| solute carrier family 48 (heme transporter), member 1                       | SLC48A1     | 2,47 |
| solute carrier family 41 (magnesium transporter), member 2                  | SLC41A2     | 2,47 |
| keratin 39, type I                                                          | KRT39       | 2,47 |
| IZUMO1 receptor, JUNO                                                       | IZUMO1R     | 2,46 |
| prefoldin subunit 1                                                         | PFDN1       | 2,46 |
| family with sequence similarity 222, member B                               | FAM222B     | 2,46 |
| AF4/FMR2 family, member 1                                                   | AFF1        | 2,46 |
| zinc finger, CCHC domain containing 4                                       | ZCCHC4      | 2,46 |
| CD3d molecule, delta (CD3-TCR complex)                                      | CD3D        | 2,46 |
| family with sequence similarity 127, member C                               | FAM127C     | 2,45 |
| runt-related transcription factor 1                                         | RUNX1       | 2,45 |
| kelch-like family member 21                                                 | KLHL21      | 2,45 |
| tyrosine 3-monooxygenase/tryptophan 5-monooxygenase activation protein, eta | YWHAH       | 2,45 |
| GRAM domain containing 3                                                    | GRAMD3      | 2,45 |

|                                                                                                                                                                                                                                                                                                                                                        |                                                                          |      |
|--------------------------------------------------------------------------------------------------------------------------------------------------------------------------------------------------------------------------------------------------------------------------------------------------------------------------------------------------------|--------------------------------------------------------------------------|------|
| UDP-GlcNAc:betaGal beta-1,3-N-acetylglucosaminyltransferase 3                                                                                                                                                                                                                                                                                          | B3GNT3                                                                   | 2,44 |
| MYST/Esa1-associated factor 6                                                                                                                                                                                                                                                                                                                          | MEAF6                                                                    | 2,44 |
| telomerase-associated protein 1                                                                                                                                                                                                                                                                                                                        | TEP1                                                                     | 2,44 |
| LSM3 homolog, U6 small nuclear RNA and mRNA degradation associated                                                                                                                                                                                                                                                                                     | LSM3                                                                     | 2,44 |
| glutathione peroxidase 8 (putative)                                                                                                                                                                                                                                                                                                                    | GPX8                                                                     | 2,44 |
| ubiquitin specific peptidase 17-like family member 24;<br>ubiquitin specific peptidase 17-like family member 26;<br>ubiquitin specific peptidase 17-like family member 5;<br>ubiquitin specific peptidase 17-like family member 27;<br>ubiquitin specific peptidase 17-like family member 29;<br>ubiquitin specific peptidase 17-like family member 30 | USP17L24;<br>USP17L26;<br>USP17L5;<br>USP17L27;<br>USP17L29;<br>USP17L30 | 2,44 |
| ubiquitin specific peptidase 17-like family member 25;<br>ubiquitin specific peptidase 17-like family member 27                                                                                                                                                                                                                                        | USP17L25;<br>USP17L27                                                    | 2,44 |
| neuroblastoma breakpoint family, member 19                                                                                                                                                                                                                                                                                                             | NBPF19                                                                   | 2,44 |
| polo-like kinase 3                                                                                                                                                                                                                                                                                                                                     | PLK3                                                                     | 2,44 |
| glycerol-3-phosphate acyltransferase 4                                                                                                                                                                                                                                                                                                                 | GPAT4                                                                    | 2,44 |
| kinesin light chain 2                                                                                                                                                                                                                                                                                                                                  | KLC2                                                                     | 2,43 |
| transmembrane protein 136                                                                                                                                                                                                                                                                                                                              | TMEM136                                                                  | 2,43 |
| glucosaminyl (N-acetyl) transferase 1, core 2                                                                                                                                                                                                                                                                                                          | GCNT1                                                                    | 2,43 |
| family with sequence similarity 122B                                                                                                                                                                                                                                                                                                                   | FAM122B                                                                  | 2,43 |
| FYVE and coiled-coil domain containing 1                                                                                                                                                                                                                                                                                                               | FYCO1                                                                    | 2,43 |
| family with sequence similarity 83, member G                                                                                                                                                                                                                                                                                                           | FAM83G                                                                   | 2,43 |
| annexin A2                                                                                                                                                                                                                                                                                                                                             | ANXA2                                                                    | 2,43 |
| centrosomal protein 89kDa                                                                                                                                                                                                                                                                                                                              | CEP89                                                                    | 2,42 |
| cyclin K                                                                                                                                                                                                                                                                                                                                               | CCNK                                                                     | 2,42 |
| major facilitator superfamily domain containing 6                                                                                                                                                                                                                                                                                                      | MFSD6                                                                    | 2,42 |
| SAP30 binding protein                                                                                                                                                                                                                                                                                                                                  | SAP30BP                                                                  | 2,42 |
| CAP-GLY domain containing linker protein 1                                                                                                                                                                                                                                                                                                             | CLIP1                                                                    | 2,42 |
| dolichyl-phosphate mannosyltransferase polypeptide 2, regulatory subunit                                                                                                                                                                                                                                                                               | DPM2                                                                     | 2,42 |
| TAF13 RNA polymerase II, TATA box binding protein (TBP)-associated factor, 18kDa                                                                                                                                                                                                                                                                       | TAF13                                                                    | 2,42 |
| periplakin                                                                                                                                                                                                                                                                                                                                             | PPL                                                                      | 2,42 |
| doublecortin-like kinase 1                                                                                                                                                                                                                                                                                                                             | DCLK1                                                                    | 2,42 |
| transmembrane channel like 8                                                                                                                                                                                                                                                                                                                           | TMC8                                                                     | 2,42 |
| coiled-coil domain containing 70                                                                                                                                                                                                                                                                                                                       | CCDC70                                                                   | 2,41 |
| MAS-related GPR, member X4                                                                                                                                                                                                                                                                                                                             | MRGPRX4                                                                  | 2,41 |
| Kruppel-like factor 11                                                                                                                                                                                                                                                                                                                                 | KLF11                                                                    | 2,41 |
| natriuretic peptide receptor 1                                                                                                                                                                                                                                                                                                                         | NPR1                                                                     | 2,41 |
| fucosyltransferase 8 (alpha (1,6) fucosyltransferase)                                                                                                                                                                                                                                                                                                  | FUT8                                                                     | 2,41 |
| 5-nucleotidase domain containing 4                                                                                                                                                                                                                                                                                                                     | NT5DC4                                                                   | 2,40 |
| failed axon connections homolog                                                                                                                                                                                                                                                                                                                        | FAXC                                                                     | 2,40 |
| membrane protein, palmitoylated 3                                                                                                                                                                                                                                                                                                                      | MPP3                                                                     | 2,40 |

|                                                                                                                                                                           |                                    |      |
|---------------------------------------------------------------------------------------------------------------------------------------------------------------------------|------------------------------------|------|
| vacuolar protein sorting 4 homolog B ( <i>S. cerevisiae</i> )                                                                                                             | VPS4B                              | 2,40 |
| SMAD specific E3 ubiquitin protein ligase 1                                                                                                                               | SMURF1                             | 2,40 |
| Y box binding protein 3                                                                                                                                                   | YBX3                               | 2,40 |
| chemokine (C-X-C motif) receptor 4                                                                                                                                        | CXCR4                              | 2,40 |
| ubiquitin specific peptidase 17-like family member 11;<br>ubiquitin specific peptidase 17-like family member 18;<br>ubiquitin specific peptidase 17-like family member 20 | USP17L11;<br>USP17L18;<br>USP17L20 | 2,40 |
| Berardinelli-Seip congenital lipodystrophy 2 (seipin)                                                                                                                     | BSCL2                              | 2,40 |
| CDC42 binding protein kinase beta (DMPK-like)                                                                                                                             | CDC42BPB                           | 2,39 |
| histone deacetylase 7                                                                                                                                                     | HDAC7                              | 2,39 |
| neutral sphingomyelinase activation associated factor                                                                                                                     | NSMAF                              | 2,39 |
| GEN1 Holliday junction 5 flap endonuclease                                                                                                                                | GEN1                               | 2,39 |
| MAGE family member A9; MAGE family member A9B                                                                                                                             | MAGEA9;<br>MAGEA9B                 | 2,39 |
| AF4/FMR2 family, member 4                                                                                                                                                 | AFF4                               | 2,38 |
| solute carrier family 9, subfamily A (NHE1, cation proton<br>antiporter 1), member 1                                                                                      | SLC9A1                             | 2,38 |
| ArfGAP with GTPase domain, ankyrin repeat and PH<br>domain 2                                                                                                              | AGAP2                              | 2,38 |
| ATPase, H <sup>+</sup> transporting, lysosomal 42kDa, V1 subunit C1                                                                                                       | ATP6V1C1                           | 2,38 |
| osteopetrosis associated transmembrane protein 1                                                                                                                          | OSTM1                              | 2,37 |
| DnaJ (Hsp40) homolog, subfamily B, member 5                                                                                                                               | DNAJB5                             | 2,37 |
| Hermansky-Pudlak syndrome 5                                                                                                                                               | HPS5                               | 2,37 |
| uncoupling protein 2 (mitochondrial, proton carrier)                                                                                                                      | UCP2                               | 2,37 |
| LLP homolog, long-term synaptic facilitation ( <i>Aplysia</i> )                                                                                                           | LLPH                               | 2,37 |
| metallothionein 2A                                                                                                                                                        | MT2A                               | 2,37 |
| MpV17 mitochondrial inner membrane protein                                                                                                                                | MPV17                              | 2,37 |
| oxysterol binding protein-like 10                                                                                                                                         | OSBPL10                            | 2,37 |
| metallothionein 1A                                                                                                                                                        | MT1A                               | 2,37 |
| meteorin, glial cell differentiation regulator-like                                                                                                                       | METRNL                             | 2,37 |
| chromosome 20 open reading frame 24                                                                                                                                       | C20orf24                           | 2,36 |
| tRNA methyltransferase 1                                                                                                                                                  | TRMT1                              | 2,36 |
| plexin A3                                                                                                                                                                 | PLXNA3                             | 2,36 |
| protein tyrosine phosphatase, receptor type, J                                                                                                                            | PTPRJ                              | 2,36 |
| ubiquitin-conjugating enzyme E2W (putative)                                                                                                                               | UBE2W                              | 2,36 |
| cortactin                                                                                                                                                                 | CTTN                               | 2,36 |
| NLR family, pyrin domain containing 1                                                                                                                                     | NLRP1                              | 2,36 |
| dynein, light chain, Tctex-type 1                                                                                                                                         | DYNLT1                             | 2,35 |
| sarcoglycan beta                                                                                                                                                          | SGCB                               | 2,35 |
| mitochondrial ribosomal protein S11                                                                                                                                       | MRPS11                             | 2,35 |
| lysine (K)-specific demethylase 1B                                                                                                                                        | KDM1B                              | 2,35 |
| pleckstrin homology domain containing, family O<br>member 2                                                                                                               | PLEKHO2                            | 2,35 |
| zinc finger protein 365                                                                                                                                                   | ZNF365                             | 2,35 |

|                                                                                                                     |                        |      |
|---------------------------------------------------------------------------------------------------------------------|------------------------|------|
| e_zrin                                                                                                              | EZR                    | 2,35 |
| Memczak2013 ANTISENSE, CDS, coding, INTERNAL best transcript NM_001184717                                           | TIPARP                 | 2,35 |
| tetraspanin 15                                                                                                      | TSPAN15                | 2,35 |
| dual specificity phosphatase 10                                                                                     | DUSP10                 | 2,34 |
| GRAM domain containing 1C                                                                                           | GRAMD1C                | 2,34 |
| ARP3 actin-related protein 3 homolog (yeast)                                                                        | ACTR3                  | 2,34 |
| pancreatic progenitor cell differentiation and proliferation factor                                                 | PPDPF                  | 2,34 |
| GRB2-related adaptor protein-like                                                                                   | GRAPL                  | 2,34 |
| protein phosphatase 2, catalytic subunit, beta isozyme                                                              | PPP2CB                 | 2,34 |
| general transcription factor IIIC subunit 5                                                                         | GTF3C5                 | 2,34 |
| POP4 homolog, ribonuclease P/MRP subunit                                                                            | POP4                   | 2,34 |
| MLX interacting protein                                                                                             | MLXIP                  | 2,34 |
| betaine--homocysteine S-methyltransferase 2                                                                         | BHMT2                  | 2,34 |
| doublecortin domain containing 5; doublecortin domain containing 1                                                  | DCDC5; DCDC1           | 2,34 |
| uncharacterized protein FLJ30679; uncharacterized protein FLJ30679 [Source:EntrezGene;Acc:146512]; novel transcript | FLJ30679; RP11-46309.8 | 2,34 |
| myeloma overexpressed                                                                                               | MYEOV                  | 2,33 |
| family with sequence similarity 122C                                                                                | FAM122C                | 2,33 |
| Transcript Identified by AceView, Entrez Gene ID(s) 7520                                                            | XRCC5                  | 2,33 |
| 8-oxoguanine DNA glycosylase                                                                                        | OGG1                   | 2,33 |
| BTB and CNC homology 1, basic leucine zipper transcription factor 1                                                 | BACH1                  | 2,33 |
| U2AF homology motif (UHM) kinase 1                                                                                  | UHMK1                  | 2,33 |
| breast carcinoma amplified sequence 3                                                                               | BCAS3                  | 2,33 |
| autophagy related 3                                                                                                 | ATG3                   | 2,33 |
| phospholipase A2, group IVC (cytosolic, calcium-independent)                                                        | PLA2G4C                | 2,33 |
| chloride intracellular channel 3                                                                                    | CLIC3                  | 2,33 |
| H2A histone family, member B3                                                                                       | H2AFB3                 | 2,33 |
| centromere protein P                                                                                                | CENPP                  | 2,33 |
| 5, 3-nucleotidase, cytosolic                                                                                        | NT5C                   | 2,33 |
| zinc finger and BTB domain containing 41                                                                            | ZBTB41                 | 2,33 |
| metallophosphoesterase 1                                                                                            | MPPE1                  | 2,32 |
| minichromosome maintenance 8 homologous recombination repair factor                                                 | MCM8                   | 2,32 |
| ADP-ribosylation factor like GTPase 4A                                                                              | ARL4A                  | 2,32 |
| prion protein                                                                                                       | PRNP                   | 2,32 |
| late cornified envelope 2D                                                                                          | LCE2D                  | 2,32 |
| family with sequence similarity 110, member B                                                                       | FAM110B                | 2,32 |
| metallothionein 3                                                                                                   | MT3                    | 2,32 |

|                                                                               |                    |      |
|-------------------------------------------------------------------------------|--------------------|------|
| coiled-coil domain containing 112                                             | CCDC112            | 2,32 |
| Williams Beuren syndrome chromosome region 27                                 | WBSCR27            | 2,32 |
| filamin binding LIM protein 1                                                 | FBLIM1             | 2,32 |
| G protein-coupled receptor 39                                                 | GPR39              | 2,32 |
| neurolysin (metallopeptidase M3 family)                                       | NLN                | 2,31 |
| tumor necrosis factor receptor superfamily, member 10a                        | TNFRSF10A          | 2,31 |
| trafficking protein particle complex 1                                        | TRAPPC1            | 2,31 |
| notch 2 N-terminal like                                                       | NOTCH2NL           | 2,31 |
| DENN/MADD domain containing 2C                                                | DENND2C            | 2,30 |
| family with sequence similarity 72, member B                                  | FAM72B             | 2,30 |
| acyl-CoA thioesterase 7                                                       | ACOT7              | 2,30 |
| small VCP/p97-interacting protein                                             | SVIP               | 2,30 |
| phosphoseryl-tRNA kinase                                                      | PSTK               | 2,30 |
| kallikrein related peptidase 13                                               | KLK13              | 2,30 |
| vesicle amine transport 1                                                     | VAT1               | 2,30 |
| oxidative stress responsive serine-rich 1                                     | OSER1              | 2,30 |
| cap methyltransferase 2                                                       | CMTR2              | 2,30 |
| primase, DNA, polypeptide 2 (58kDa)                                           | PRIM2              | 2,29 |
| ribonucleotide reductase M1                                                   | RRM1               | 2,29 |
| plasminogen activator, tissue                                                 | PLAT               | 2,29 |
| alpha kinase 1                                                                | ALPK1              | 2,29 |
| zinc finger protein 267                                                       | ZNF267             | 2,29 |
| zinc finger protein 585A                                                      | ZNF585A            | 2,29 |
| poly(ADP-ribose) polymerase family member 3                                   | PARP3              | 2,29 |
| spermatogenesis associated 12                                                 | SPATA12            | 2,29 |
| digestive organ expansion factor homolog (zebrafish)                          | DIEXF              | 2,29 |
| TGIF2-C20orf24 readthrough                                                    | TGIF2-C20orf24     | 2,29 |
| v-maf avian musculoaponeurotic fibrosarcoma oncogene homolog F                | MAFF               | 2,28 |
| ADAMTS like 5                                                                 | ADAMTSL5           | 2,28 |
| TatD DNase domain containing 1; microRNA 6844                                 | TATDN1;<br>MIR6844 | 2,28 |
| phospholipid transfer protein                                                 | PLTP               | 2,28 |
| KIAA0513                                                                      | KIAA0513           | 2,28 |
| oligonucleotide/oligosaccharide-binding fold containing 1                     | OBFC1              | 2,28 |
| CTS telomere maintenance complex component 1                                  | CTC1               | 2,28 |
| kinesin-associated protein 3                                                  | KIFAP3             | 2,27 |
| TBP-like 1                                                                    | TBPL1              | 2,27 |
| inhibitor of kappa light polypeptide gene enhancer in B-cells, kinase epsilon | IKBKE              | 2,27 |
| UBX domain protein 8                                                          | UBXN8              | 2,27 |
| tripartite motif containing 16-like                                           | TRIM16L            | 2,27 |

|                                                                                                                                 |                    |      |
|---------------------------------------------------------------------------------------------------------------------------------|--------------------|------|
| ArfGAP with RhoGAP domain, ankyrin repeat and PH domain 2                                                                       | ARAP2              | 2,27 |
| CREB3 regulatory factor                                                                                                         | CREBRF             | 2,27 |
| gastrin-releasing peptide receptor                                                                                              | GRPR               | 2,27 |
| PHD finger protein 11                                                                                                           | PHF11              | 2,27 |
| solute carrier family 15 (oligopeptide transporter), member 4                                                                   | SLC15A4            | 2,27 |
| tetratricopeptide repeat domain 1                                                                                               | TTC1               | 2,26 |
| heat shock transcription factor 1                                                                                               | HSF1               | 2,26 |
| KISS-1 metastasis-suppressor                                                                                                    | KISS1              | 2,26 |
| programmed cell death 1                                                                                                         | PDCD1              | 2,26 |
| cathepsin B                                                                                                                     | CTSB               | 2,26 |
| Rho family GTPase 3                                                                                                             | RND3               | 2,26 |
| sushi-repeat containing protein, X-linked                                                                                       | SRPX               | 2,26 |
| chromosome 4 open reading frame 36                                                                                              | C4orf36            | 2,26 |
| leucine zipper protein 1                                                                                                        | LUZP1              | 2,26 |
| thioredoxin-like 4B                                                                                                             | TXNL4B             | 2,26 |
| family with sequence similarity 72, member C                                                                                    | FAM72C             | 2,26 |
| Transcript Identified by AceView, Entrez Gene ID(s) 114757; novel transcript, antisense to PRCD                                 | CYGB; RP11-666A8.8 | 2,26 |
| golgin A8 family, member K; ULK4 pseudogene 1                                                                                   | GOLGA8K; ULK4P1    | 2,26 |
| phosphatidylinositol-4,5-bisphosphate 3-kinase, catalytic subunit delta                                                         | PIK3CD             | 2,26 |
| ankyrin repeat and BTB (POZ) domain containing 2                                                                                | ABTB2              | 2,26 |
| novel transcript, antisense to C16orf53 and MVP; PAXIP1 associated glutamate-rich protein 1 [Source:HGNC Symbol;Acc:HGNC:28707] | AC009133.12; PAGR1 | 2,26 |
| cyclin-dependent kinase 18                                                                                                      | CDK18              | 2,25 |
| DNA fragmentation factor, 45kDa, alpha polypeptide                                                                              | DFFA               | 2,25 |
| tenascin XA (pseudogene)                                                                                                        | TNXA               | 2,25 |
| sialic acid acetyltransferase                                                                                                   | SIAE               | 2,25 |
| creatine kinase, mitochondrial 1B; creatine kinase, mitochondrial 1A                                                            | CKMT1B; CKMT1A     | 2,25 |
| profilin 2                                                                                                                      | PFN2               | 2,25 |
| praja ring finger 1, E3 ubiquitin protein ligase                                                                                | PJA1               | 2,25 |
| Ras and Rab interactor like                                                                                                     | RINL               | 2,25 |
| keratin associated protein 3-1                                                                                                  | KRTAP3-1           | 2,25 |
| epiplakin 1                                                                                                                     | EPPK1              | 2,25 |
| platelet-activating factor acetylhydrolase 2                                                                                    | PAFAH2             | 2,25 |
| solute carrier family 25, member 52                                                                                             | SLC25A52           | 2,25 |
| migration and invasion enhancer 1                                                                                               | MIEN1              | 2,25 |
| coagulation factor VIII-associated 2; coagulation factor VIII-associated 3; coagulation factor VIII-associated 1                | F8A2; F8A3; F8A1   | 2,25 |
| E2F transcription factor 3                                                                                                      | E2F3               | 2,25 |

|                                                                    |                |      |
|--------------------------------------------------------------------|----------------|------|
| mediator complex subunit 10                                        | MED10          | 2,25 |
| CD59 molecule, complement regulatory protein                       | CD59           | 2,24 |
| Transcript Identified by AceView, Entrez Gene ID(s) 27301          | APEX2          | 2,24 |
| solute carrier family 7, member 6 opposite strand                  | SLC7A6OS       | 2,24 |
| BTB (POZ) domain containing 10                                     | BTBD10         | 2,24 |
| aldehyde dehydrogenase 3 family, member A1                         | ALDH3A1        | 2,24 |
| Ras and Rab interactor 1                                           | RIN1           | 2,24 |
| pregnancy specific beta-1-glycoprotein 7<br>(gene/pseudogene)      | PSG7           | 2,23 |
| negative elongation factor complex member E; microRNA<br>1236      | NELFE; MIR1236 | 2,23 |
| leukotriene B4 receptor; leukotriene B4 receptor 2                 | LTB4R; LTB4R2  | 2,23 |
| EH domain containing 4                                             | EHD4           | 2,23 |
| tumor protein p53 inducible protein 3                              | TP53I3         | 2,23 |
| coiled-coil domain containing 84                                   | CCDC84         | 2,23 |
| ets homologous factor                                              | EHF            | 2,23 |
| pyrimidinergic receptor P2Y, G-protein coupled, 6                  | P2RY6          | 2,23 |
| leucine rich repeat containing 8 family, member C                  | LRRC8C         | 2,23 |
| SH3 domain binding kinase family, member 3                         | SBK3           | 2,23 |
| zinc finger and BTB domain containing 2                            | ZBTB2          | 2,23 |
| HAUS augmin like complex subunit 2                                 | HAUS2          | 2,23 |
| testin LIM domain protein                                          | TES            | 2,23 |
| hes family bHLH transcription factor 4                             | HES4           | 2,22 |
| zinc finger protein 426                                            | ZNF426         | 2,22 |
| aldo-keto reductase family 1, member B1 (aldose<br>reductase)      | AKR1B1         | 2,22 |
| ubiquitin-like 3                                                   | UBL3           | 2,22 |
| chromosome 1 open reading frame 106                                | C1orf106       | 2,22 |
| glycerophosphodiester phosphodiesterase domain<br>containing 4     | GDPD4          | 2,22 |
| DNA-damage-inducible transcript 3                                  | DDIT3          | 2,22 |
| ATPase, H <sup>+</sup> transporting, lysosomal 21kDa, V0 subunit b | ATP6V0B        | 2,22 |
| chromosome 15 open reading frame 65                                | C15orf65       | 2,21 |
| AMMECR1 like                                                       | AMMECR1L       | 2,21 |
| adaptor-related protein complex 1, mu 1 subunit                    | AP1M1          | 2,21 |
| FLYWCH-type zinc finger 1                                          | FLYWCH1        | 2,21 |
| tumor protein D52-like 1                                           | TPD52L1        | 2,21 |
| GTP binding protein 2                                              | GTPBP2         | 2,20 |
| glutaredoxin                                                       | GLRX           | 2,20 |
| phospholipase C, beta 2                                            | PLCB2          | 2,20 |
| chemokine (C-C motif) ligand 5                                     | CCL5           | 2,20 |
| ladinin 1                                                          | LAD1           | 2,20 |
| ER membrane protein complex subunit 4                              | EMC4           | 2,20 |
| zinc finger, CCHC domain containing 8                              | ZCCHC8         | 2,20 |

|                                                                             |          |      |
|-----------------------------------------------------------------------------|----------|------|
| small integral membrane protein 14                                          | SMIM14   | 2,20 |
| BLOC-1 related complex subunit 5                                            | BORCS5   | 2,20 |
| laminin, alpha 3                                                            | LAMA3    | 2,20 |
| syntaxin 7                                                                  | STX7     | 2,20 |
| zinc finger and BTB domain containing 4                                     | ZBTB4    | 2,20 |
| serine incorporator 3                                                       | SERINC3  | 2,20 |
| collagen, type XII, alpha 1                                                 | COL12A1  | 2,19 |
| DENN/MADD domain containing 3                                               | DENND3   | 2,19 |
| stress-associated endoplasmic reticulum protein 1                           | SERP1    | 2,19 |
| betaine--homocysteine S-methyltransferase                                   | BHMT     | 2,19 |
| solute carrier family 22, member 15                                         | SLC22A15 | 2,19 |
| ATPase, H <sup>+</sup> transporting, lysosomal 9kDa, V0 subunit e1          | ATP6V0E1 | 2,19 |
| NADH dehydrogenase (ubiquinone) 1 beta subcomplex, 3, 12kDa                 | NDUFB3   | 2,19 |
| ataxin 3                                                                    | ATXN3    | 2,19 |
| ZPR1 zinc finger                                                            | ZPR1     | 2,19 |
| nuclear factor, erythroid 4                                                 | NFE4     | 2,19 |
| zinc finger and BTB domain containing 43                                    | ZBTB43   | 2,19 |
| baculoviral IAP repeat containing 7                                         | BIRC7    | 2,19 |
| CD36 molecule (thrombospondin receptor)                                     | CD36     | 2,18 |
| zinc finger and SCAN domain containing 9                                    | ZSCAN9   | 2,18 |
| Memczak2013 ANTISENSE, coding, INTERNAL, intronic best transcript NM_018023 | YEATS2   | 2,18 |
| methyltransferase like 7B                                                   | METTL7B  | 2,18 |
| tripartite motif containing 69                                              | TRIM69   | 2,18 |
| family with sequence similarity 72, member D                                | FAM72D   | 2,18 |
| zinc finger protein 703                                                     | ZNF703   | 2,18 |
| target of myb1 membrane trafficking protein                                 | TOM1     | 2,18 |
| zinc finger protein 823                                                     | ZNF823   | 2,18 |
| KIAA0753                                                                    | KIAA0753 | 2,18 |
| transmembrane protein 133                                                   | TMEM133  | 2,18 |
| adaptor-related protein complex 5, zeta 1 subunit                           | AP5Z1    | 2,18 |
| vesicle associated membrane protein 2                                       | VAMP2    | 2,18 |
| Memczak2013 ANTISENSE, CDS, coding, INTERNAL best transcript NM_001456      | FLNA     | 2,18 |
| enabled homolog (Drosophila)                                                | ENAH     | 2,18 |
| sterile alpha motif domain containing 4B                                    | SAMD4B   | 2,17 |
| exophilin 5                                                                 | EXPH5    | 2,17 |
| MLX interacting protein                                                     | MLXIP    | 2,17 |
| DDB1 and CUL4 associated factor 4                                           | DCAF4    | 2,17 |
| RAB22A, member RAS oncogene family                                          | RAB22A   | 2,17 |
| zinc finger protein 397                                                     | ZNF397   | 2,17 |
| HHIP-like 2                                                                 | HHIPL2   | 2,17 |
| WD repeat domain 13                                                         | WDR13    | 2,17 |
| autophagy related 4A, cysteine peptidase                                    | ATG4A    | 2,17 |



|                                                                |                          |      |
|----------------------------------------------------------------|--------------------------|------|
| guanine nucleotide binding protein (G protein), alpha 13       | GNA13                    | 2,17 |
| protein phosphatase 2, regulatory subunit B, alpha             | PPP2R2A                  | 2,17 |
| A kinase (PRKA) anchor protein 13; microRNA 7706               | AKAP13; MIR7706          | 2,16 |
| uncharacterized LOC389602; novel transcript                    | LOC389602;<br>AC021218.2 | 2,16 |
| keratin associated protein 4-4                                 | KRTAP4-4                 | 2,16 |
| tripartite motif containing 55                                 | TRIM55                   | 2,16 |
| prostaglandin I2 (prostacyclin) receptor (IP)                  | PTGIR                    | 2,16 |
| sestrin 2                                                      | SESN2                    | 2,16 |
| G-patch domain containing 11                                   | GPATCH11                 | 2,16 |
| muscleblind like splicing regulator 1                          | MBNL1                    | 2,16 |
| 3-oxoacid CoA-transferase 1                                    | OXCT1                    | 2,16 |
| family with sequence similarity 72, member A                   | FAM72A                   | 2,16 |
| glutathione synthetase                                         | GSS                      | 2,16 |
| COP9 signalosome subunit 8                                     | COPS8                    | 2,15 |
| MOB kinase activator 3A                                        | MOB3A                    | 2,15 |
| chitinase 3-like 2                                             | CHI3L2                   | 2,15 |
| chromosome 16 open reading frame 46                            | C16orf46                 | 2,15 |
| SAS-6 centriolar assembly protein                              | SASS6                    | 2,15 |
| UBX domain protein 11                                          | UBXN11                   | 2,15 |
| chromogranin B                                                 | CHGB                     | 2,15 |
| NIMA-related kinase 1                                          | NEK1                     | 2,15 |
| diacylglycerol lipase, alpha                                   | DAGLA                    | 2,15 |
| family with sequence similarity 103, member A1                 | FAM103A1                 | 2,15 |
| HECT domain containing E3 ubiquitin protein ligase 3           | HECTD3                   | 2,15 |
| influenza virus NS1A binding protein                           | IVNS1ABP                 | 2,15 |
| phospholipase B domain containing 2                            | PLBD2                    | 2,15 |
| G protein-coupled receptor 55                                  | GPR55                    | 2,15 |
| tubulin, beta 2B class IIb                                     | TUBB2B                   | 2,15 |
| LYN proto-oncogene, Src family tyrosine kinase                 | LYN                      | 2,15 |
| NOP10 ribonucleoprotein                                        | NOP10                    | 2,15 |
| dickkopf WNT signaling pathway inhibitor 1                     | DKK1                     | 2,15 |
| spermidine/spermine N1-acetyl transferase-like 1               | SATL1                    | 2,15 |
| EPS8-like 3                                                    | EPS8L3                   | 2,15 |
| cytochrome b5 reductase 1                                      | CYB5R1                   | 2,14 |
| upregulator of cell proliferation; URGCP-MRPS24<br>readthrough | URGCP; URGCP-<br>MRPS24  | 2,14 |
| CDC28 protein kinase regulatory subunit 1B                     | CKS1B                    | 2,14 |
| chromosome 11 open reading frame 1                             | C11orf1                  | 2,14 |
| family with sequence similarity 184, member B                  | FAM184B                  | 2,14 |
| phosphatidylinositol-5-phosphate 4-kinase, type II,<br>gamma   | PIP4K2C                  | 2,14 |
| mitogen-activated protein kinase kinase kinase 9               | MAP3K9                   | 2,14 |
| bromodomain adjacent to zinc finger domain 1A                  | BAZ1A                    | 2,14 |

|                                                                                                                  |                           |      |
|------------------------------------------------------------------------------------------------------------------|---------------------------|------|
| ribonucleotide reductase M2                                                                                      | RRM2                      | 2,14 |
| ADP-ribosylation factor like GTPase 16                                                                           | ARL16                     | 2,14 |
| N-ethylmaleimide-sensitive factor attachment protein, alpha                                                      | NAPA                      | 2,14 |
| cholecystokinin                                                                                                  | CCK                       | 2,14 |
| PBX/knotted 1 homeobox 2                                                                                         | PKNOX2                    | 2,14 |
| T-cell leukemia translocation altered                                                                            | TCTA                      | 2,14 |
| polycomb group ring finger 1                                                                                     | PCGF1                     | 2,14 |
| solute carrier family 41 (magnesium transporter), member 1                                                       | SLC41A1                   | 2,14 |
| surfeit 2 [Source:HGNC Symbol;Acc:HGNC:11475]                                                                    | SURF2                     | 2,14 |
| complement component 5a receptor 1                                                                               | C5AR1                     | 2,14 |
| transmembrane protein 33                                                                                         | TMEM33                    | 2,14 |
| plectin                                                                                                          | PLEC                      | 2,13 |
| TNF receptor-associated factor 6, E3 ubiquitin protein ligase                                                    | TRAF6                     | 2,13 |
| synovial sarcoma, X breakpoint 7                                                                                 | SSX7                      | 2,13 |
| Rho GTPase activating protein 29                                                                                 | ARHGAP29                  | 2,13 |
| dehydrodolichyl diphosphate synthase subunit                                                                     | DHDDS                     | 2,13 |
| host cell factor C2                                                                                              | HCFC2                     | 2,13 |
| spermatogenesis associated 2                                                                                     | SPATA2                    | 2,13 |
| Rho/Rac guanine nucleotide exchange factor 2                                                                     | ARHGEF2                   | 2,13 |
| uncharacterized LOC441178; novel transcript                                                                      | LOC441178; RP11-351J23.1  | 2,13 |
| ubiquitin specific peptidase 54                                                                                  | USP54                     | 2,13 |
| interleukin 7 receptor                                                                                           | IL7R                      | 2,13 |
| chromosome 14 open reading frame 2                                                                               | C14orf2                   | 2,13 |
| keratin 80, type II                                                                                              | KRT80                     | 2,13 |
| myelin protein zero-like 2                                                                                       | MPZL2                     | 2,12 |
| exportin 6                                                                                                       | XPO6                      | 2,12 |
| zinc finger, DHHC-type containing 11                                                                             | ZDHHC11                   | 2,12 |
| coronin 7; presequence translocase-associated motor 16 homolog ( <i>S. cerevisiae</i> ); CORO7-PAM16 readthrough | CORO7; PAM16; CORO7-PAM16 | 2,12 |
| zinc finger protein 778                                                                                          | ZNF778                    | 2,12 |
| protein kinase, AMP-activated, gamma 1 non-catalytic subunit                                                     | PRKAG1                    | 2,12 |
| phosphofurin acidic cluster sorting protein 1                                                                    | PACS1                     | 2,12 |
| pleckstrin 2                                                                                                     | PLEK2                     | 2,12 |
| actin related protein 2/3 complex subunit 2                                                                      | ARPC2                     | 2,12 |
| tubulin, alpha-like 3                                                                                            | TUBAL3                    | 2,12 |
| antigen p97 (melanoma associated) identified by monoclonal antibodies 133.2 and 96.5                             | MFI2                      | 2,12 |
| LIM domains containing 1                                                                                         | LIMD1                     | 2,12 |
| family with sequence similarity 43, member A                                                                     | FAM43A                    | 2,12 |
| NOP2/Sun domain family, member 6                                                                                 | NSUN6                     | 2,12 |

|                                                                                                                                 |                |      |
|---------------------------------------------------------------------------------------------------------------------------------|----------------|------|
| pleckstrin homology-like domain, family B, member 2;<br>phosphatidylinositol-specific phospholipase C, X domain<br>containing 2 | PHLDB2; PLCXD2 | 2,12 |
| TCF3 (E2A) fusion partner (in childhood Leukemia)                                                                               | TFPT           | 2,12 |
| apolipoprotein O                                                                                                                | APOO           | 2,12 |
| transmembrane protein 209                                                                                                       | TMEM209        | 2,12 |
| C1QTNF9B antisense RNA 1                                                                                                        | C1QTNF9B-AS1   | 2,11 |
| WD repeat domain 41                                                                                                             | WDR41          | 2,11 |
| THAP domain containing 6                                                                                                        | THAP6          | 2,11 |
| RRN3 homolog, RNA polymerase I transcription factor                                                                             | RRN3           | 2,11 |
| epidermal growth factor receptor                                                                                                | EGFR           | 2,11 |
| SH2 domain containing 2A                                                                                                        | SH2D2A         | 2,11 |
| F-box protein 33                                                                                                                | FBXO33         | 2,11 |
| breast cancer anti-estrogen resistance 3                                                                                        | BCAR3          | 2,11 |
| latent transforming growth factor beta binding protein 2                                                                        | LTBP2          | 2,11 |
| transmembrane protein 185B                                                                                                      | TMEM185B       | 2,11 |
| solute carrier family 51, beta subunit                                                                                          | SLC51B         | 2,11 |
| microtubule associated serine/threonine kinase family<br>member 4                                                               | MAST4          | 2,11 |
| bone morphogenetic protein 6                                                                                                    | BMP6           | 2,10 |
| SPOC domain containing 1                                                                                                        | SPOCD1         | 2,10 |
| ATPase, H <sup>+</sup> transporting, lysosomal accessory protein 1-<br>like                                                     | ATP6AP1L       | 2,10 |
| nurim (nuclear envelope membrane protein)                                                                                       | NRM            | 2,10 |
| chromodomain protein, Y-like                                                                                                    | CDYL           | 2,10 |
| SH2 domain containing 5                                                                                                         | SH2D5          | 2,10 |
| eukaryotic translation initiation factor 2B, subunit 2 beta,<br>39kDa                                                           | EIF2B2         | 2,10 |
| RNA 3-terminal phosphate cyclase                                                                                                | RTCA           | 2,10 |
| CWC27 spliceosome-associated protein homolog                                                                                    | CWC27          | 2,10 |
| microtubule-associated protein 1S                                                                                               | MAP1S          | 2,10 |
| retinoic acid receptor, alpha                                                                                                   | RARA           | 2,10 |
| zinc finger protein 461                                                                                                         | ZNF461         | 2,10 |
| synapsin I                                                                                                                      | SYN1           | 2,10 |
| ADAM metallopeptidase with thrombospondin type 1<br>motif 9                                                                     | ADAMTS9        | 2,10 |
| tripartite motif containing 6                                                                                                   | TRIM6          | 2,10 |
| adaptor-related protein complex 1 sigma 1 subunit                                                                               | AP1S1          | 2,10 |
| vacuolar protein sorting 45 homolog (S. cerevisiae)                                                                             | VPS45          | 2,10 |
| cysteine-rich tail protein 1                                                                                                    | CYSRT1         | 2,09 |
| multiple EGF-like-domains 9                                                                                                     | MEGF9          | 2,09 |
| gap junction protein gamma 1                                                                                                    | GJC1           | 2,09 |
| transient receptor potential cation channel, subfamily M,<br>member 4                                                           | TRPM4          | 2,09 |

|                                                                               |                      |      |
|-------------------------------------------------------------------------------|----------------------|------|
| ataxin 1                                                                      | ATXN1                | 2,09 |
| BCS1 homolog, ubiquinol-cytochrome c reductase complex chaperone              | BCS1L                | 2,09 |
| MORC family CW-type zinc finger 4                                             | MORC4                | 2,09 |
| TGFB-induced factor homeobox 1                                                | TGIF1                | 2,09 |
| zinc finger protein 706                                                       | ZNF706               | 2,09 |
| solute carrier family 22 (organic anion/urate transporter), member 11         | SLC22A11             | 2,09 |
| aquaporin 8                                                                   | AQP8                 | 2,09 |
| coiled-coil domain containing 74B                                             | CCDC74B              | 2,09 |
| disrupted in renal carcinoma 2                                                | DIRC2                | 2,09 |
| keratin 31, type I                                                            | KRT31                | 2,09 |
| ADAM metallopeptidase domain 15                                               | ADAM15               | 2,08 |
| TNFAIP3 interacting protein 1                                                 | TNIP1                | 2,08 |
| dehydrogenase/reductase (SDR family) member 2                                 | DHRS2                | 2,08 |
| X-ray radiation resistance associated 1                                       | XRRA1                | 2,08 |
| creatine kinase, mitochondrial 1A                                             | CKMT1A               | 2,08 |
| 3-hydroxyisobutyrate dehydrogenase                                            | HIBADH               | 2,08 |
| v-maf avian musculoaponeurotic fibrosarcoma oncogene homolog K                | MAFK                 | 2,08 |
| tumor necrosis factor, alpha-induced protein 2                                | TNFAIP2              | 2,08 |
| leukocyte receptor cluster (LRC) member 8                                     | LENG8                | 2,08 |
| aspartate beta-hydroxylase                                                    | ASPH                 | 2,08 |
| TCDD-inducible poly(ADP-ribose) polymerase                                    | TIPARP               | 2,08 |
| aspartylglucosaminidase                                                       | AGA                  | 2,08 |
| myo-inositol oxygenase                                                        | MIOX                 | 2,07 |
| large 60S subunit nuclear export GTPase 1                                     | LSG1                 | 2,07 |
| caspase 4                                                                     | CASP4                | 2,07 |
| solute carrier family 2 (facilitated glucose transporter), member 3           | SLC2A3               | 2,07 |
| interferon stimulated exonuclease gene 20kDa                                  | ISG20                | 2,07 |
| coiled-coil domain containing 80; long intergenic non-protein coding RNA 1279 | CCDC80;<br>LINC01279 | 2,07 |
| long intergenic non-protein coding RNA 346                                    | LINC00346            | 2,07 |
| ZNF529 antisense RNA 1                                                        | ZNF529-AS1           | 2,07 |
| cyclin Pas1/PHO80 domain containing 1                                         | CNPPD1               | 2,07 |
| cell division cycle 20                                                        | CDC20                | 2,07 |
| PHD finger protein 20                                                         | PHF20                | 2,07 |
| cryptochrome circadian clock 1                                                | CRY1                 | 2,07 |
| ubiquitin specific peptidase 17-like family member 17                         | USP17L17             | 2,07 |
| myosin light chain 12B                                                        | MYL12B               | 2,07 |
| long intergenic non-protein coding RNA 243                                    | LINC00243            | 2,07 |
| regulator of calcineurin 1                                                    | RCAN1                | 2,07 |
| tumor necrosis factor receptor superfamily, member 9                          | TNFRSF9              | 2,06 |

|                                                                                       |                |      |
|---------------------------------------------------------------------------------------|----------------|------|
| solute carrier family 16 (monocarboxylate transporter), member 1                      | SLC16A1        | 2,06 |
| tubulin tyrosine ligase-like family member 7                                          | TTLL7          | 2,06 |
| adhesion G protein-coupled receptor G3                                                | ADGRG3         | 2,06 |
| LDL receptor related protein 12                                                       | LRP12          | 2,06 |
| distal-less homeobox 3                                                                | DLX3           | 2,06 |
| cytochrome b5 reductase 4                                                             | CYB5R4         | 2,06 |
| killer cell lectin-like receptor subfamily C, member 1                                | KLRC1          | 2,06 |
| DALR anticodon binding domain containing 3                                            | DALRD3         | 2,06 |
| methyltransferase like 22                                                             | METTL22        | 2,06 |
| distal-less homeobox 2                                                                | DLX2           | 2,06 |
| keratinocyte associated protein 2                                                     | KRTCAP2        | 2,06 |
| spinster homolog 1 (Drosophila)                                                       | SPNS1          | 2,06 |
| Fanconi anemia core complex associated protein 24                                     | FAAP24         | 2,05 |
| endonuclease domain containing 1                                                      | ENDOD1         | 2,05 |
| charged multivesicular body protein 1B                                                | CHMP1B         | 2,05 |
| destrin (actin depolymerizing factor)                                                 | DSTN           | 2,05 |
| hematological and neurological expressed 1                                            | HN1            | 2,05 |
| E2F transcription factor 7                                                            | E2F7           | 2,05 |
| U-box domain containing 5; FAST kinase domains 5                                      | UBOX5; FASTKD5 | 2,05 |
| renin                                                                                 | REN            | 2,05 |
| chloride channel, voltage-sensitive 3                                                 | CLCN3          | 2,05 |
| insulin receptor substrate 1                                                          | IRS1           | 2,05 |
| cyclin-dependent kinase 11B                                                           | CDK11B         | 2,05 |
| GRP1 (general receptor for phosphoinositides 1)-associated scaffold protein           | GRASP          | 2,04 |
| anoctamin 2, calcium activated chloride channel                                       | ANO2           | 2,04 |
| PRKR interacting protein 1 (IL11 inducible)                                           | PRKRIP1        | 2,04 |
| integrator complex subunit 4                                                          | INTS4          | 2,04 |
| protein kinase, AMP-activated, alpha 2 catalytic subunit                              | PRKAA2         | 2,04 |
| prostate stem cell antigen                                                            | PSCA           | 2,04 |
| cholinergic receptor, nicotinic beta 4                                                | CHRNA4         | 2,04 |
| monoacylglycerol O-acyltransferase 3                                                  | MOGAT3         | 2,04 |
| SWI5-dependent homologous recombination repair protein 1                              | SFR1           | 2,04 |
| cell division cycle 7                                                                 | CDC7           | 2,03 |
| heat shock 70kDa protein 6 (HSP70B)                                                   | HSPA6          | 2,03 |
| epsin 2; EPN2 intronic transcript 1                                                   | EPN2; EPN2-IT1 | 2,03 |
| potassium channel, voltage gated KQT-like subfamily Q, member 5                       | KCNQ5          | 2,03 |
| regulator of chromosome condensation (RCC1) and BTB (POZ) domain containing protein 1 | RCBTB1         | 2,03 |
| glypican 1                                                                            | GPC1           | 2,03 |
| zinc finger protein 438                                                               | ZNF438         | 2,03 |
| PTEN induced putative kinase 1; microRNA 6084                                         | PINK1; MIR6084 | 2,03 |

|                                                                             |                          |      |
|-----------------------------------------------------------------------------|--------------------------|------|
| endogenous retrovirus group 3, member 1; zinc finger protein 117            | ERV3-1; ZNF117           | 2,03 |
| programmed cell death 6 interacting protein                                 | PDCD6IP                  | 2,03 |
| UTP4 small subunit (SSU) processome component                               | UTP4                     | 2,03 |
| replication termination factor 2 domain containing 1                        | RTFDC1                   | 2,03 |
| galactose-3-O-sulfotransferase 4                                            | GAL3ST4                  | 2,03 |
| receptor (G protein-coupled) activity modifying protein 2                   | RAMP2                    | 2,02 |
| transmembrane protein 236                                                   | TMEM236                  | 2,02 |
| serine/threonine kinase 10                                                  | STK10                    | 2,02 |
| transport and golgi organization 6 homolog                                  | TANGO6                   | 2,02 |
| CD151 molecule (Raph blood group)                                           | CD151                    | 2,02 |
| tropomyosin 4                                                               | TPM4                     | 2,02 |
| pregnancy specific beta-1-glycoprotein 2                                    | PSG2                     | 2,02 |
| synaptotagmin-like 3                                                        | SYTL3                    | 2,02 |
| Sp2 transcription factor                                                    | SP2                      | 2,02 |
| angiominin like 1                                                           | AMOTL1                   | 2,02 |
| zinc finger protein 701; zinc finger protein 137, pseudogene                | ZNF701; ZNF137P          | 2,02 |
| UTP11-like, U3 small nucleolar ribonucleoprotein (yeast)                    | UTP11L                   | 2,02 |
| leucine-rich repeats and calponin homology (CH) domain containing 1         | LRCH1                    | 2,02 |
| ATPase, H <sup>+</sup> transporting, lysosomal 56/58kDa, V1 subunit B2      | ATP6V1B2                 | 2,02 |
| RAN binding protein 10                                                      | RANBP10                  | 2,02 |
| EP300 interacting inhibitor of differentiation 3                            | EID3                     | 2,01 |
| hexosaminidase A (alpha polypeptide)                                        | HEXA                     | 2,01 |
| zinc finger protein 114                                                     | ZNF114                   | 2,01 |
| syntaxin 18                                                                 | STX18                    | 2,01 |
| uncharacterized LOC728485; novel transcript                                 | LOC728485; CTD-2162K18.4 | 2,01 |
| tal1; microRNA 6852                                                         | TLN1; MIR6852            | 2,01 |
| chromosome 18 open reading frame 32                                         | C18orf32                 | 2,01 |
| zinc finger protein 844                                                     | ZNF844                   | 2,01 |
| Sjogren syndrome/scleroderma autoantigen 1                                  | SSSCA1                   | 2,01 |
| nei-like DNA glycosylase 3                                                  | NEIL3                    | 2,01 |
| Transcript Identified by AceView, Entrez Gene ID(s) 51555                   | PEX5L                    | 2,01 |
| neurobeachin like 2                                                         | NBEAL2                   | 2,01 |
| pannexin 1                                                                  | PANX1                    | 2,01 |
| protein tyrosine phosphatase, receptor type, M                              | PTPRM                    | 2,01 |
| ATPase, H <sup>+</sup> transporting, lysosomal V0 subunit a1; microRNA 5010 | ATP6V0A1; MIR5010        | 2,01 |
| protein tyrosine phosphatase, non-receptor type 7                           | PTPN7                    | 2,01 |

|                                                                                        |                         |      |
|----------------------------------------------------------------------------------------|-------------------------|------|
| MICAL-like 1                                                                           | MICALL1                 | 2,01 |
| mucin 12, cell surface associated                                                      | MUC12                   | 2,00 |
| family with sequence similarity 83, member H                                           | FAM83H                  | 2,00 |
| TatD DNase domain containing 3                                                         | TATDN3                  | 2,00 |
| lin-37 DREAM MuvB core complex component                                               | LIN37                   | 2,00 |
| ring finger protein, transmembrane 2                                                   | RNFT2                   | 2,00 |
| Tax1 (human T-cell leukemia virus type I) binding protein 1                            | TAX1BP1                 | 2,00 |
| STE20-like kinase                                                                      | SLK                     | 2,00 |
| epithelial cell transforming 2                                                         | ECT2                    | 2,00 |
| DnaJ (Hsp40) homolog, subfamily C, member 24                                           | DNAJC24                 | 2,00 |
| ring finger protein 213                                                                | RNF213                  | 2,00 |
| brain and reproductive organ-expressed (TNFRSF1A modulator)                            | BRE                     | 2,00 |
| inosine triphosphatase (nucleoside triphosphate pyrophosphatase)                       | ITPA                    | 2,00 |
| dual specificity phosphatase 8                                                         | DUSP8                   | 2,00 |
| bromodomain containing 9                                                               | BRD9                    | 2,00 |
| RAB13, member RAS oncogene family                                                      | RAB13                   | 2,00 |
| ubiquitin fusion degradation 1 like (yeast)                                            | UFD1L                   | 2,00 |
| SKI-like proto-oncogene                                                                | SKIL                    | 2,00 |
| matrix metalloproteinase 20                                                            | MMP20                   | 2,00 |
| laminin, alpha 2                                                                       | LAMA2                   | 2,00 |
| aryl hydrocarbon receptor                                                              | AHR                     | 2,00 |
| ATPase, H <sup>+</sup> transporting, lysosomal 16kDa, V0 subunit c                     | ATP6V0C                 | 1,99 |
| folliculin                                                                             | FLCN                    | 1,99 |
| glycosylated lysosomal membrane protein                                                | GLMP                    | 1,99 |
| zinc finger protein 433                                                                | ZNF433                  | 1,99 |
| solute carrier family 10, member 3                                                     | SLC10A3                 | 1,99 |
| ankyrin repeat domain 20 family, member A1; ankyrin repeat domain 20 family, member A3 | ANKRD20A1;<br>ANKRD20A3 | 1,99 |
| tripartite motif containing 22                                                         | TRIM22                  | 1,99 |
| aminoadipate aminotransferase                                                          | AADAT                   | 1,99 |
| mesothelin                                                                             | MSLN                    | 1,99 |
| tripeptidyl peptidase I                                                                | TPP1                    | 1,99 |
| elongation factor Tu GTP binding domain containing 1                                   | EFTUD1                  | 1,99 |
| protein phosphatase methylesterase 1                                                   | PPME1                   | 1,99 |
| transcription factor binding to IGHM enhancer 3                                        | TFE3                    | 1,99 |
| B-cell receptor-associated protein 29                                                  | BCAP29                  | 1,99 |
| coagulation factor VIII-associated 2                                                   | F8A2                    | 1,99 |
| chromosome 2 open reading frame 76                                                     | C2orf76                 | 1,98 |
| phosphatidylinositol-3,4,5-trisphosphate-dependent Rac exchange factor 1               | PREX1                   | 1,98 |
| transmembrane protein 14B                                                              | TMEM14B                 | 1,98 |
| RNA binding motif protein 19                                                           | RBM19                   | 1,98 |

|                                                                                                                           |                                           |      |
|---------------------------------------------------------------------------------------------------------------------------|-------------------------------------------|------|
| nuclear apoptosis inducing factor 1                                                                                       | NAIF1                                     | 1,98 |
| TRIO and F-actin binding protein; nucleolar protein 12                                                                    | TRIOBP; NOL12                             | 1,98 |
| chromosome 17 open reading frame 89                                                                                       | C17orf89                                  | 1,98 |
| PERP, TP53 apoptosis effector                                                                                             | PERP                                      | 1,98 |
| tripartite motif containing 36                                                                                            | TRIM36                                    | 1,98 |
| TMEM9 domain family, member B                                                                                             | TMEM9B                                    | 1,98 |
| follistatin-like 3 (secreted glycoprotein)                                                                                | FSTL3                                     | 1,98 |
| integrator complex subunit 4 pseudogene 2                                                                                 | INTS4P2                                   | 1,98 |
| transglutaminase 5                                                                                                        | TGM5                                      | 1,98 |
| N(alpha)-acetyltransferase 30, NatC catalytic subunit                                                                     | NAA30                                     | 1,98 |
| MLX interacting protein                                                                                                   | MLXIP                                     | 1,98 |
| ROR1 antisense RNA 1                                                                                                      | ROR1-AS1                                  | 1,98 |
| mitogen-activated protein kinase 8 interacting protein 3                                                                  | MAPK8IP3                                  | 1,97 |
| transmembrane channel like 6                                                                                              | TMC6                                      | 1,97 |
| nuclear receptor binding protein 2; microRNA 6845                                                                         | NRBP2; MIR6845                            | 1,97 |
| calcium channel, voltage-dependent, T type, alpha 1H subunit                                                              | CACNA1H                                   | 1,97 |
| TSEN2 tRNA splicing endonuclease subunit                                                                                  | TSEN2                                     | 1,97 |
| ceroid-lipofuscinosis, neuronal 6, late infantile, variant                                                                | CLN6                                      | 1,97 |
| shisa family member 5                                                                                                     | SHISA5                                    | 1,97 |
| N-acetylglucosamine kinase                                                                                                | NAGK                                      | 1,97 |
| CD3e molecule, epsilon associated protein                                                                                 | CD3EAP                                    | 1,97 |
| TBC1 domain family, member 2B                                                                                             | TBC1D2B                                   | 1,97 |
| tuberous sclerosis 1                                                                                                      | TSC1                                      | 1,97 |
| SREK1-interacting protein 1                                                                                               | SREK1IP1                                  | 1,97 |
| zinc fingers and homeoboxes 3                                                                                             | ZHX3                                      | 1,97 |
| coiled-coil domain containing 84                                                                                          | CCDC84                                    | 1,97 |
| adhesion G protein-coupled receptor E2                                                                                    | ADGRE2                                    | 1,97 |
| microfibrillar associated protein 2                                                                                       | MFAP2                                     | 1,97 |
| mitogen-activated protein kinase 8 interacting protein 2                                                                  | MAPK8IP2                                  | 1,97 |
| DNL-type zinc finger                                                                                                      | DNLZ                                      | 1,97 |
| transmembrane protein 127                                                                                                 | TMEM127                                   | 1,97 |
| nuclear protein 1, transcriptional regulator                                                                              | NUPR1                                     | 1,96 |
| NHL repeat containing E3 ubiquitin protein ligase 1                                                                       | NHLRC1                                    | 1,96 |
| tripartite motif containing 25; microRNA 3614                                                                             | TRIM25; MIR3614                           | 1,96 |
| DAZ associated protein 2                                                                                                  | DAZAP2                                    | 1,96 |
| methyltransferase like 23                                                                                                 | METTL23                                   | 1,96 |
| actin-related protein 10 homolog (S. cerevisiae)                                                                          | ACTR10                                    | 1,96 |
| lipoyltransferase 1                                                                                                       | LIPT1                                     | 1,96 |
| KIAA1462                                                                                                                  | KIAA1462                                  | 1,96 |
| alkB homolog 6                                                                                                            | ALKBH6                                    | 1,96 |
| uncharacterized LOC79999; Homo sapiens<br>uncharacterized protein ENSP00000382042 (LOC388436),<br>mRNA.; novel transcript | LOC79999;<br>LOC388436; RP11-<br>744A16.4 | 1,96 |



|                                                                                   |                           |      |
|-----------------------------------------------------------------------------------|---------------------------|------|
| ferrochelatase                                                                    | FECH                      | 1,96 |
| inhibitor of kappa light polypeptide gene enhancer in B-cells, kinase gamma       | IKBKG                     | 1,96 |
| tensin 2                                                                          | TNS2                      | 1,96 |
| vacuolar protein sorting 72 homolog (S. cerevisiae)                               | VPS72                     | 1,96 |
| charged multivesicular body protein 3                                             | CHMP3                     | 1,96 |
| COX14 cytochrome c oxidase assembly factor                                        | COX14                     | 1,96 |
| splicing factor 3b, subunit 4, 49kDa                                              | SF3B4                     | 1,96 |
| solute carrier family 25 (mitochondrial carrier; phosphate carrier), member 24    | SLC25A24                  | 1,96 |
| syntaxin 11                                                                       | STX11                     | 1,96 |
| discoidin, CUB and LCCL domain containing 1                                       | DCBLD1                    | 1,96 |
| pecanex-like 4 (Drosophila)                                                       | PCNXL4                    | 1,96 |
| ubiquitin-like domain containing CTD phosphatase 1                                | UBLCP1                    | 1,96 |
| enhancer of zeste 1 polycomb repressive complex 2 subunit                         | EZH1                      | 1,95 |
| myosin light chain 12A                                                            | MYL12A                    | 1,95 |
| roundabout guidance receptor 4                                                    | ROBO4                     | 1,95 |
| GIN5 complex subunit 4 (Sld5 homolog)                                             | GIN54                     | 1,95 |
| ring finger protein 115                                                           | RNF115                    | 1,95 |
| forkhead box J3                                                                   | FOXJ3                     | 1,95 |
| lymphocyte-specific protein 1 pseudogene 3                                        | LSP1P3                    | 1,95 |
| glycolipid transfer protein                                                       | GLTP                      | 1,95 |
| chloride channel, voltage-sensitive 7                                             | CLCN7                     | 1,95 |
| preferentially expressed antigen in melanoma                                      | PRAME                     | 1,95 |
| chromosome 10 open reading frame 91                                               | C10orf91                  | 1,95 |
| POTE ankyrin domain family, member I                                              | POTEI                     | 1,95 |
| hydrogen voltage gated channel 1                                                  | HVCN1                     | 1,95 |
| cell division cycle 25B                                                           | CDC25B                    | 1,95 |
| apolipoprotein D                                                                  | APOD                      | 1,95 |
| suppressor of glucose, autophagy associated 1                                     | SOGA1                     | 1,94 |
| MORN repeat containing 4                                                          | MORN4                     | 1,94 |
| ribonucleotide reductase M2 B (TP53 inducible)                                    | RRM2B                     | 1,94 |
| fucose mutarotase                                                                 | FUOM                      | 1,94 |
| leucine rich repeat containing 16A                                                | LRRC16A                   | 1,94 |
| IQ motif containing J; schwannomin interacting protein 1; IQCJ-SCHIP1 readthrough | IQCJ; SCHIP1; IQCJ-SCHIP1 | 1,94 |
| myelin expression factor 2                                                        | MYEF2                     | 1,94 |
| coiled-coil domain containing 24                                                  | CCDC24                    | 1,94 |
| catsper channel auxiliary subunit gamma                                           | CATSPERG                  | 1,94 |
| Nedd4 family interacting protein 1                                                | NDFIP1                    | 1,94 |
| RAB21, member RAS oncogene family                                                 | RAB21                     | 1,94 |
| cAMP responsive element binding protein 3                                         | CREB3                     | 1,94 |
| retinol dehydrogenase 10 (all-trans)                                              | RDH10                     | 1,94 |
| glucose-6-phosphate dehydrogenase                                                 | G6PD                      | 1,93 |

|                                                                                                                     |                                       |      |
|---------------------------------------------------------------------------------------------------------------------|---------------------------------------|------|
| KIAA1033                                                                                                            | KIAA1033                              | 1,93 |
| defensin, beta 108B                                                                                                 | DEFB108B                              | 1,93 |
| nudix hydrolase 14                                                                                                  | NUDT14                                | 1,93 |
| dickkopf WNT signaling pathway inhibitor 2                                                                          | DKK2                                  | 1,93 |
| growth arrest-specific 8                                                                                            | GAS8                                  | 1,93 |
| agouti signaling protein                                                                                            | ASIP                                  | 1,93 |
| Homo sapiens uncharacterized LOC79999 (LOC79999), mRNA.; uncharacterized protein ENSP00000382042; novel transcript  | LOC79999;<br>LOC388436;<br>AC007952.5 | 1,93 |
| cytohesin 2                                                                                                         | CYTH2                                 | 1,93 |
| tripartite motif containing 35                                                                                      | TRIM35                                | 1,93 |
| PTGES3L-AARSD1 readthrough; prostaglandin E synthase 3 (cytosolic)-like; alanyl-tRNA synthetase domain containing 1 | PTGES3L-AARSD1;<br>PTGES3L; AARSD1    | 1,93 |
| transmembrane protein 69                                                                                            | TMEM69                                | 1,93 |
| lysozyme G-like 2                                                                                                   | LYG2                                  | 1,93 |
| capping protein (actin filament), gelsolin-like                                                                     | CAPG                                  | 1,93 |
| VPS26 retromer complex component A                                                                                  | VPS26A                                | 1,93 |
| adenylate cyclase 7                                                                                                 | ADCY7                                 | 1,92 |
| MAGE family member A2                                                                                               | MAGEA2                                | 1,92 |
| leucine-rich single-pass membrane protein 1                                                                         | LSMEM1                                | 1,92 |
| limb development membrane protein 1-like                                                                            | LMBR1L                                | 1,92 |
| zinc finger protein 611                                                                                             | ZNF611                                | 1,92 |
| chromosome 10 open reading frame 11                                                                                 | C10orf11                              | 1,92 |
| zinc finger CCCH-type containing 12A; microRNA 6732                                                                 | ZC3H12A;<br>MIR6732                   | 1,92 |
| exocyst complex component 8                                                                                         | EXOC8                                 | 1,92 |
| TAF10 RNA polymerase II, TATA box binding protein (TBP)-associated factor, 30kDa                                    | TAF10                                 | 1,92 |
| SH3 domain containing 21                                                                                            | SH3D21                                | 1,92 |
| tropomodulin 1                                                                                                      | TMOD1                                 | 1,91 |
| cms1 ribosomal small subunit homolog (yeast)                                                                        | CMSS1                                 | 1,91 |
| Janus kinase 2                                                                                                      | JAK2                                  | 1,91 |
| ATP binding cassette subfamily C member 4                                                                           | ABCC4                                 | 1,91 |
| toll-like receptor adaptor molecule 1                                                                               | TICAM1                                | 1,91 |
| potassium channel tetramerization domain containing 18                                                              | KCTD18                                | 1,91 |
| Rho GTPase activating protein 21                                                                                    | ARHGAP21                              | 1,91 |
| coagulation factor VIII-associated 3                                                                                | F8A3                                  | 1,91 |
| interleukin 23, alpha subunit p19                                                                                   | IL23A                                 | 1,91 |
| ATP binding cassette subfamily B member 11                                                                          | ABCB11                                | 1,91 |
| abhydrolase domain containing 2                                                                                     | ABHD2                                 | 1,91 |
| mannosidase, beta A, lysosomal-like                                                                                 | MANBAL                                | 1,91 |
| myosin IE                                                                                                           | MYO1E                                 | 1,91 |

|                                                                                        |                     |      |
|----------------------------------------------------------------------------------------|---------------------|------|
| exoribonuclease 1                                                                      | ERI1                | 1,91 |
| zinc finger protein 888                                                                | ZNF888              | 1,91 |
| PHD finger protein 23                                                                  | PHF23               | 1,91 |
| TTK protein kinase                                                                     | TTK                 | 1,91 |
| kinesin family member 21A                                                              | KIF21A              | 1,91 |
| KIAA1683                                                                               | KIAA1683            | 1,91 |
| Jeck2013 ANTISENSE, CDS, coding, INTERNAL, OVCODE, OVEXON best transcript NM_001110556 | FLNA                | 1,91 |
| coiled-coil domain containing 14                                                       | CCDC14              | 1,91 |
| cysteinyl-tRNA synthetase 2, mitochondrial (putative)                                  | CARS2               | 1,90 |
| ribonuclease/angiogenin inhibitor 1                                                    | RNH1                | 1,90 |
| Memczak2013 ANTISENSE, CDS, coding, INTERNAL best transcript NM_001204426              | LIMK1               | 1,90 |
| zinc finger protein 646                                                                | ZNF646              | 1,90 |
| syntaxin 8                                                                             | STX8                | 1,90 |
| Bardet-Biedl syndrome 1                                                                | BBS1                | 1,90 |
| leucine rich repeat containing 49                                                      | LRRC49              | 1,90 |
| proteasome 26S subunit, ATPase 4 [Source:HGNC Symbol;Acc:HGNC:9551]                    | PSMC4               | 1,90 |
| dedicator of cytokinesis 5                                                             | DOCK5               | 1,90 |
| microtubule-associated protein 1 light chain 3 beta 2                                  | MAP1LC3B2           | 1,90 |
| clathrin, light chain A                                                                | CLTA                | 1,90 |
| 6-phosphofructo-2-kinase/fructose-2,6-biphosphatase 3                                  | PFKFB3              | 1,90 |
| biglycan                                                                               | BGN                 | 1,89 |
| salvador family WW domain containing protein 1                                         | SAV1                | 1,89 |
| myosin XVB                                                                             | MYO15B              | 1,89 |
| zinc finger protein 394                                                                | ZNF394              | 1,89 |
| late cornified envelope 2A                                                             | LCE2A               | 1,89 |
| alkB homolog 2, alpha-ketoglutarate-dependent dioxygenase                              | ALKBH2              | 1,89 |
| zinc finger protein 808; ribosomal protein L39 pseudogene 34                           | ZNF808;<br>RPL39P34 | 1,89 |
| ubiquitin protein ligase E3 component n-recognin 4                                     | UBR4                | 1,89 |
| MAP/microtubule affinity-regulating kinase 3                                           | MARK3               | 1,89 |
| immediate early response 3                                                             | IER3                | 1,89 |
| acyl-CoA thioesterase 9                                                                | ACOT9               | 1,89 |
| testis expressed 15                                                                    | TEX15               | 1,89 |
| proteasome 26S subunit, non-ATPase 13                                                  | PSMD13              | 1,89 |
| DnaJ (Hsp40) homolog, subfamily B, member 1                                            | DNAJB1              | 1,88 |
| sperm associated antigen 9                                                             | SPAG9               | 1,88 |
| POTE ankyrin domain family, member E                                                   | POTEE               | 1,88 |
| phosphatidylinositol transfer protein, alpha                                           | PITPNA              | 1,88 |
| tumor necrosis factor (ligand) superfamily, member 9                                   | TNFSF9              | 1,88 |
| nuclear receptor subfamily 1, group H, member 2                                        | NR1H2               | 1,88 |

|                                                                                               |                       |      |
|-----------------------------------------------------------------------------------------------|-----------------------|------|
| translocase of inner mitochondrial membrane 10 homolog (yeast)                                | TIMM10                | 1,88 |
| nuclear factor of kappa light polypeptide gene enhancer in B-cells 2 (p49/p100)               | NFKB2                 | 1,88 |
| patatin-like phospholipase domain containing 8                                                | PNPLA8                | 1,88 |
| RAD23 homolog A, nucleotide excision repair protein                                           | RAD23A                | 1,88 |
| sideroflexin 5                                                                                | SFXN5                 | 1,88 |
| major facilitator superfamily domain containing 10                                            | MFSD10                | 1,88 |
| ATP binding cassette subfamily A member 7                                                     | ABCA7                 | 1,88 |
| itchy E3 ubiquitin protein ligase                                                             | ITCH                  | 1,88 |
| holocytochrome c synthase                                                                     | HCCS                  | 1,88 |
| angiopoietin 2                                                                                | ANGPT2                | 1,88 |
| cyclin-dependent kinase 11A                                                                   | CDK11A                | 1,88 |
| DENN/MADD domain containing 5A                                                                | DENND5A               | 1,88 |
| PC-esterase domain containing 1B                                                              | PCED1B                | 1,88 |
| Zhang2013 ALT_ACCEPTOR, ALT_DONOR, coding, INTERNAL, intronic best transcript NM_006877       | GMPR                  | 1,87 |
| ZFP90 zinc finger protein                                                                     | ZFP90                 | 1,87 |
| poly(ADP-ribose) polymerase 2                                                                 | PARP2                 | 1,87 |
| solute carrier family 2 (facilitated glucose transporter), member 14                          | SLC2A14               | 1,87 |
| chromosome 12 open reading frame 45                                                           | C12orf45              | 1,87 |
| keratin 75, type II                                                                           | KRT75                 | 1,87 |
| oxysterol binding protein-like 7                                                              | OSBPL7                | 1,87 |
| MET proto-oncogene, receptor tyrosine kinase                                                  | MET                   | 1,87 |
| core-binding factor, beta subunit                                                             | CBFB                  | 1,87 |
| solute carrier family 27 (fatty acid transporter), member 4                                   | SLC27A4               | 1,87 |
| serpin peptidase inhibitor, clade E (nexin, plasminogen activator inhibitor type 1), member 1 | SERPINE1              | 1,87 |
| cerebral cavernous malformation 2                                                             | CCM2                  | 1,87 |
| reticulon 1                                                                                   | RTN1                  | 1,87 |
| aldehyde dehydrogenase 3 family, member B1                                                    | ALDH3B1               | 1,87 |
| solute carrier family 35, member E4                                                           | SLC35E4               | 1,87 |
| FKBP1A-SDCBP2 readthrough (NMD candidate)                                                     | FKBP1A-SDCBP2         | 1,87 |
| transmembrane protein 45B                                                                     | TMEM45B               | 1,87 |
| zinc finger protein 845                                                                       | ZNF845                | 1,87 |
| presenilin enhancer gamma secretase subunit                                                   | PSENEN                | 1,87 |
| potassium channel tetramerization domain containing 5                                         | KCTD5                 | 1,86 |
| regulatory subunit of type II PKA R-subunit (RIIa) domain containing 1                        | RIIAD1                | 1,86 |
| chromosome 15 open reading frame 57; mitochondrial ribosomal protein L42 pseudogene 5         | C15orf57;<br>MRPL42P5 | 1,86 |
| ubiquitin specific peptidase 4 (proto-oncogene)                                               | USP4                  | 1,86 |
| Pim-1 proto-oncogene, serine/threonine kinase                                                 | PIM1                  | 1,86 |

|                                                                                                     |                                         |      |
|-----------------------------------------------------------------------------------------------------|-----------------------------------------|------|
| beta-1,3-glucuronyltransferase 3                                                                    | B3GAT3                                  | 1,86 |
| cholinergic receptor, nicotinic beta 1                                                              | CHRNA1                                  | 1,86 |
| transglutaminase 4                                                                                  | TGM4                                    | 1,86 |
| zinc finger and SCAN domain containing 26                                                           | ZSCAN26                                 | 1,86 |
| nucleolar complex associated 4 homolog                                                              | NOC4L                                   | 1,86 |
| nuclear receptor subfamily 3, group C, member 1<br>(glucocorticoid receptor)                        | NR3C1                                   | 1,86 |
| ATP/GTP binding protein 1                                                                           | AGTPBP1                                 | 1,86 |
| xenotropic and polytropic retrovirus receptor 1                                                     | XPR1                                    | 1,85 |
| Rho GTPase activating protein 40                                                                    | ARHGAP40                                | 1,85 |
| keratinocyte proline-rich protein                                                                   | KPRP                                    | 1,85 |
| ArfGAP with dual PH domains 2                                                                       | ADAP2                                   | 1,85 |
| neural precursor cell expressed, developmentally down-regulated 4-like, E3 ubiquitin protein ligase | NEDD4L                                  | 1,85 |
| abhydrolase domain containing 11                                                                    | ABHD11                                  | 1,85 |
| nitrilase family, member 2                                                                          | NIT2                                    | 1,85 |
| ribonuclease, RNase K; chromosome 17 open reading frame 49; RNASEK-C17orf49 readthrough             | RNASEK;<br>C17orf49;<br>RNASEK-C17orf49 | 1,85 |
| cadherin 24, type 2                                                                                 | CDH24                                   | 1,85 |
| zinc finger and BTB domain containing 3                                                             | ZBTB3                                   | 1,85 |
| fibrosin                                                                                            | FBRS                                    | 1,85 |
| epiregulin                                                                                          | EREG                                    | 1,85 |
| choroideremia-like (Rab escort protein 2)                                                           | CHML                                    | 1,85 |
| Ras association (RalGDS/AF-6) domain family (N-terminal) member 10                                  | RASSF10                                 | 1,85 |
| transmembrane protein 185A                                                                          | TMEM185A                                | 1,85 |
| thyroid hormone receptor interactor 4                                                               | TRIP4                                   | 1,84 |
| zinc finger protein interacting with K protein 1                                                    | ZIK1                                    | 1,84 |
| serine/threonine/tyrosine interacting-like 1                                                        | STYXL1                                  | 1,84 |
| RAP2B, member of RAS oncogene family                                                                | RAP2B                                   | 1,84 |
| KIAA0391                                                                                            | KIAA0391                                | 1,84 |
| AT rich interactive domain 5A (MRF1-like)                                                           | ARID5A                                  | 1,84 |
| cell division cycle associated 7                                                                    | CDCA7                                   | 1,84 |
| centromere protein Q                                                                                | CENPQ                                   | 1,84 |
| myc target 1                                                                                        | MYCT1                                   | 1,84 |
| doublecortin domain containing 2                                                                    | DCDC2                                   | 1,84 |
| ring finger protein 11                                                                              | RNF11                                   | 1,84 |
| pleckstrin homology domain containing, family F (with FYVE domain) member 1                         | PLEKHF1                                 | 1,84 |
| coronin, actin binding protein, 1B                                                                  | CORO1B                                  | 1,84 |
| VPS50 EARP/GARPII complex subunit                                                                   | VPS50                                   | 1,84 |
| poly(ADP-ribose) polymerase family member 4                                                         | PARP4                                   | 1,84 |
| nuclear transcription factor, X-box binding 1                                                       | NFX1                                    | 1,84 |

|                                                                                                               |                        |      |
|---------------------------------------------------------------------------------------------------------------|------------------------|------|
| coiled-coil domain containing 77                                                                              | CCDC77                 | 1,84 |
| centromere protein U                                                                                          | CENPU                  | 1,84 |
| RNF103-CHMP3 readthrough; charged multivesicular body protein 3                                               | RNF103-CHMP3;<br>CHMP3 | 1,84 |
| integrin beta 1                                                                                               | ITGB1                  | 1,84 |
| testis expressed 10                                                                                           | TEX10                  | 1,84 |
| solute carrier family 45, member 3                                                                            | SLC45A3                | 1,84 |
| PDZ and LIM domain 4                                                                                          | PDLIM4                 | 1,83 |
| interleukin 20                                                                                                | IL20                   | 1,83 |
| spectrin, beta, non-erythrocytic 2                                                                            | SPTBN2                 | 1,83 |
| tyrosyl-DNA phosphodiesterase 2                                                                               | TDP2                   | 1,83 |
| glutaredoxin 3                                                                                                | GLRX3                  | 1,83 |
| kelch-like family member 18                                                                                   | KLHL18                 | 1,83 |
| myotubularin related protein 9                                                                                | MTMR9                  | 1,83 |
| phospholipase A2-activating protein                                                                           | PLAA                   | 1,83 |
| glucose-fructose oxidoreductase domain containing 1                                                           | GFOD1                  | 1,83 |
| signal transducer and activator of transcription 6,<br>interleukin-4 induced                                  | STAT6                  | 1,83 |
| holocarboxylase synthetase (biotin-(propionyl-CoA-<br>carboxylase (ATP-hydrolysing)) ligase)                  | HLCS                   | 1,83 |
| RNA binding protein with multiple splicing                                                                    | RBPMS                  | 1,83 |
| Down syndrome critical region 3                                                                               | DSCR3                  | 1,83 |
| spastic paraplegia 21 (autosomal recessive, Mast<br>syndrome)                                                 | SPG21                  | 1,83 |
| charged multivesicular body protein 4B                                                                        | CHMP4B                 | 1,83 |
| chromosome 12 open reading frame 43                                                                           | C12orf43               | 1,83 |
| dopey family member 2                                                                                         | DOPEY2                 | 1,83 |
| deltex 4, E3 ubiquitin ligase                                                                                 | DTX4                   | 1,83 |
| protein tyrosine phosphatase, non-receptor type 1                                                             | PTPN1                  | 1,83 |
| membrane associated ring finger 7                                                                             | MARCH7                 | 1,83 |
| ubiquitin specific peptidase 17-like family member 3;<br>ubiquitin specific peptidase 17-like family member 8 | USP17L3;<br>USP17L8    | 1,83 |
| karyopherin alpha 4 (importin alpha 3)                                                                        | KPNA4                  | 1,83 |
| arrestin domain containing 2                                                                                  | ARRDC2                 | 1,83 |
| junction plakoglobin                                                                                          | JUP                    | 1,83 |
| biogenesis of lysosomal organelles complex-1, subunit 3                                                       | BLOC1S3                | 1,83 |
| solute carrier family 23 (ascorbic acid transporter),<br>member 2                                             | SLC23A2                | 1,82 |
| calpain 8                                                                                                     | CAPN8                  | 1,82 |
| metallothionein 1H-like 1                                                                                     | MT1HL1                 | 1,82 |
| t-complex 11, testis-specific-like 1                                                                          | TCP11L1                | 1,82 |
| paraoxonase 2                                                                                                 | PON2                   | 1,82 |
| translocase of inner mitochondrial membrane 22<br>homolog (yeast)                                             | TIMM22                 | 1,82 |

|                                                                                                               |                                             |      |
|---------------------------------------------------------------------------------------------------------------|---------------------------------------------|------|
| VPS33B interacting protein, apical-basolateral polarity regulator, spe-39 homolog                             | VIPAS39                                     | 1,82 |
| beaded filament structural protein 1, filensin                                                                | BFSP1                                       | 1,82 |
| von Willebrand factor A domain containing 7                                                                   | VWA7                                        | 1,82 |
| BCL2-interacting killer (apoptosis-inducing)                                                                  | BIK                                         | 1,82 |
| protein phosphatase 1, regulatory subunit 7                                                                   | PPP1R7                                      | 1,82 |
| chromosome 18 open reading frame 8                                                                            | C18orf8                                     | 1,82 |
| zinc finger, C2HC-type containing 1A                                                                          | ZC2HC1A                                     | 1,82 |
| cytochrome b reductase 1                                                                                      | CYBRD1                                      | 1,82 |
| trafficking protein particle complex 6B                                                                       | TRAPPC6B                                    | 1,82 |
| plexin domain containing 1                                                                                    | PLXDC1                                      | 1,82 |
| transforming, acidic coiled-coil containing protein 2                                                         | TACC2                                       | 1,82 |
| pyridine nucleotide-disulphide oxidoreductase domain 1                                                        | PYROXD1                                     | 1,82 |
| ATPase, H <sup>+</sup> transporting, lysosomal 34kDa, V1 subunit D                                            | ATP6V1D                                     | 1,82 |
| caspase recruitment domain family, member 6                                                                   | CARD6                                       | 1,82 |
| abhydrolase domain containing 12                                                                              | ABHD12                                      | 1,82 |
| Ras protein-specific guanine nucleotide-releasing factor 1                                                    | RASGRF1                                     | 1,82 |
| dysbindin (dystrobrevin binding protein 1) domain containing 2                                                | DBNDD2                                      | 1,82 |
| ArfGAP with SH3 domain, ankyrin repeat and PH domain 2                                                        | ASAP2                                       | 1,82 |
| TERF1 (TRF1)-interacting nuclear factor 2                                                                     | TINF2                                       | 1,82 |
| aryl hydrocarbon receptor nuclear translocator-like 2                                                         | ARNTL2                                      | 1,81 |
| kelch-like family member 4                                                                                    | KLHL4                                       | 1,81 |
| SEC14-like lipid binding 1; small Cajal body-specific RNA 16; small nucleolar RNA host gene 20; microRNA 6516 | SEC14L1;<br>SCARNA16;<br>SNHG20;<br>MIR6516 | 1,81 |
| family with sequence similarity 86, member B1                                                                 | FAM86B1                                     | 1,81 |
| ornithine decarboxylase 1; small nucleolar RNA, H/ACA box 80B                                                 | ODC1; SNORA80B                              | 1,81 |
| discs, large homolog 3 (Drosophila)                                                                           | DLG3                                        | 1,81 |
| otoraplin                                                                                                     | OTOR                                        | 1,81 |
| GTP binding protein 1                                                                                         | GTPBP1                                      | 1,81 |
| myomesin 3                                                                                                    | MYOM3                                       | 1,81 |
| SP140 nuclear body protein-like                                                                               | SP140L                                      | 1,81 |
| chromosome 11 open reading frame 86                                                                           | C11orf86                                    | 1,81 |
| family with sequence similarity 173, member B                                                                 | FAM173B                                     | 1,81 |
| Cbl proto-oncogene B, E3 ubiquitin protein ligase                                                             | CBLB                                        | 1,81 |
| ALS2, alsin Rho guanine nucleotide exchange factor                                                            | ALS2                                        | 1,81 |
| cyclin-dependent kinase-like 1 (CDC2-related kinase)                                                          | CDKL1                                       | 1,81 |
| catenin (cadherin-associated protein), alpha 1                                                                | CTNNA1                                      | 1,81 |
| ribosomal protein S6 kinase, 90kDa, polypeptide 4                                                             | RPS6KA4                                     | 1,81 |
| zinc finger protein 142                                                                                       | ZNF142                                      | 1,81 |

|                                                                  |         |      |
|------------------------------------------------------------------|---------|------|
| chromobox homolog 6                                              | CBX6    | 1,81 |
| nucleoporin 50kDa                                                | NUP50   | 1,81 |
| coiled-coil domain containing 125                                | CCDC125 | 1,80 |
| deleted in primary ciliary dyskinesia homolog (mouse)            | DPCD    | 1,80 |
| solute carrier family 38, member 1                               | SLC38A1 | 1,80 |
| CAP, adenylate cyclase-associated protein 1 (yeast)              | CAP1    | 1,80 |
| ring finger protein 128, E3 ubiquitin protein ligase             | RNF128  | 1,80 |
| platelet-derived growth factor beta polypeptide                  | PDGFB   | 1,80 |
| src kinase associated phosphoprotein 2                           | SKAP2   | 1,80 |
| caspase recruitment domain family, member 19                     | CARD19  | 1,80 |
| RNA polymerase II associated protein 1                           | RPAP1   | 1,80 |
| synaptogyrin 4                                                   | SYNGR4  | 1,80 |
| SH3 domain binding kinase family, member 2                       | SBK2    | 1,80 |
| GLI family zinc finger 4                                         | GLI4    | 1,80 |
| cystatin B (stefin B)                                            | CSTB    | 1,80 |
| phosphoglucosyltransferase 2-like 1                              | PGM2L1  | 1,80 |
| tenascin XB                                                      | TNXB    | 1,80 |
| TOX high mobility group box family member 4                      | TOX4    | 1,80 |
| AKT1 substrate 1 (proline rich)                                  | AKT1S1  | 1,80 |
| zinc finger protein 274                                          | ZNF274  | 1,79 |
| EFR3 homolog B                                                   | EFR3B   | 1,79 |
| serine/arginine repetitive matrix 1                              | SRRM1   | 1,79 |
| zeta chain of T cell receptor associated protein kinase<br>70kDa | ZAP70   | 1,79 |
| WD repeat domain 72                                              | WDR72   | 1,79 |
| cathepsin L family member 3, pseudogene                          | CTSL3P  | 1,79 |
| epoxide hydrolase 4                                              | EPHX4   | 1,79 |
| lysophosphatidylcholine acyltransferase 1                        | LPCAT1  | 1,79 |
| ephrin-B1                                                        | EFNB1   | 1,79 |
| NCK-associated protein 1                                         | NCKAP1  | 1,79 |
| golgin A8 family, member 5                                       | GOLGA8S | 1,79 |
| FCH and double SH3 domains 1                                     | FCHSD1  | 1,79 |
| V-set and immunoglobulin domain containing 10 like               | VSIG10L | 1,79 |
| GLI pathogenesis-related 2                                       | GLIPR2  | 1,79 |
| family with sequence similarity 46, member B                     | FAM46B  | 1,79 |
| Transcript Identified by AceView, Entrez Gene ID(s) 23358        | USP24   | 1,79 |
| small nuclear RNA activating complex polypeptide 5               | SNAPC5  | 1,79 |
| charged multivesicular body protein 2A                           | CHMP2A  | 1,79 |
| ubiquitin protein ligase E3 component n-recognin 1               | UBR1    | 1,79 |
| DEAD (Asp-Glu-Ala-Asp) box polypeptide 52                        | DDX52   | 1,79 |
| SERTA domain containing 2                                        | SERTAD2 | 1,79 |
| dynein, light chain, roadblock-type 1                            | DYNLRB1 | 1,79 |
| glutathione S-transferase zeta 1                                 | GSTZ1   | 1,78 |
| general transcription factor IIA 1                               | GTF2A1  | 1,78 |



|                                                                                        |                             |      |
|----------------------------------------------------------------------------------------|-----------------------------|------|
| bromodomain containing 2                                                               | BRD2                        | 1,78 |
| ZFP57 zinc finger protein                                                              | ZFP57                       | 1,78 |
| cysteine rich transmembrane BMP regulator 1 (chordin-like)                             | CRIM1                       | 1,78 |
| VPS9 domain containing 1                                                               | VPS9D1                      | 1,78 |
| RAB5C, member RAS oncogene family                                                      | RAB5C                       | 1,78 |
| ring finger protein 4                                                                  | RNF4                        | 1,78 |
| late cornified envelope 1B                                                             | LCE1B                       | 1,78 |
| PIN2/TERF1 interacting, telomerase inhibitor 1; microRNA 1322                          | PINX1; MIR1322              | 1,78 |
| BCL2-associated athanogene 2                                                           | BAG2                        | 1,78 |
| unkempt family zinc finger-like                                                        | UNKL                        | 1,78 |
| CDK5 regulatory subunit associated protein 1-like 1                                    | CDKAL1                      | 1,78 |
| protein phosphatase 1, regulatory subunit 13 like                                      | PPP1R13L                    | 1,78 |
| zinc finger protein 473                                                                | ZNF473                      | 1,78 |
| centrobin, centrosomal BRCA2 interacting protein                                       | CNTROB                      | 1,78 |
| ring finger protein 114                                                                | RNF114                      | 1,78 |
| UDP-Gal:betaGlcNAc beta 1,4- galactosyltransferase, polypeptide 6                      | B4GALT6                     | 1,78 |
| myristoylated alanine-rich protein kinase C substrate                                  | MARCKS                      | 1,78 |
| NSE1 homolog, SMC5-SMC6 complex component                                              | NSMCE1                      | 1,78 |
| Fc fragment of IgM receptor                                                            | FCMR                        | 1,78 |
| myelin basic protein                                                                   | MBP                         | 1,78 |
| sema domain, immunoglobulin domain (Ig), short basic domain, secreted, (semaphorin) 3C | SEMA3C                      | 1,78 |
| RAB29, member RAS oncogene family                                                      | RAB29                       | 1,78 |
| Myb/SANT-like DNA-binding domain containing 2                                          | MSANTD2                     | 1,78 |
| Transcript Identified by AceView, Entrez Gene ID(s) 85442                              | KNDC1                       | 1,78 |
| nudE neurodevelopment protein 1; microRNA 484                                          | NDE1; MIR484                | 1,78 |
| annexin A2 receptor                                                                    | ANXA2R                      | 1,78 |
| interleukin 10 receptor, alpha                                                         | IL10RA                      | 1,78 |
| collagen alpha-1(II) chain-like; novel transcript                                      | LOC101928841; RP11-102K13.5 | 1,77 |
| zinc finger protein 226                                                                | ZNF226                      | 1,77 |
| PBX/knotted 1 homeobox 1                                                               | PKNOX1                      | 1,77 |
| BTB (POZ) domain containing 1                                                          | BTBD1                       | 1,77 |
| cytochrome P450, family 4, subfamily F, polypeptide 11                                 | CYP4F11                     | 1,77 |
| autophagy related 13                                                                   | ATG13                       | 1,77 |
| phosphatase and actin regulator 2                                                      | PHACTR2                     | 1,77 |
| isocitrate dehydrogenase 3 (NAD+) beta                                                 | IDH3B                       | 1,77 |
| neuronal pentraxin receptor                                                            | NPTXR                       | 1,77 |
| lamin A/C                                                                              | LMNA                        | 1,77 |
| Smith-Magenis syndrome chromosome region, candidate 8                                  | SMCR8                       | 1,77 |

|                                                                                 |                     |      |
|---------------------------------------------------------------------------------|---------------------|------|
| tetra-peptide repeat homeobox 1                                                 | TPRX1               | 1,77 |
| tripartite motif containing 3                                                   | TRIM3               | 1,77 |
| Memczak2013 ANTISENSE, coding, INTERNAL, intronic<br>best transcript NM_022157  | RRAGC               | 1,77 |
| protein phosphatase 1, regulatory subunit 10                                    | PPP1R10             | 1,77 |
| nucleolar protein 6 (RNA-associated)                                            | NOL6                | 1,77 |
| transmembrane protein 199; microRNA 4723                                        | TMEM199;<br>MIR4723 | 1,77 |
| glutamate-rich WD repeat containing 1                                           | GRWD1               | 1,77 |
| interferon induced transmembrane protein 1                                      | IFITM1              | 1,77 |
| centrosomal protein 112kDa                                                      | CEP112              | 1,77 |
| pleckstrin homology domain containing, family H (with<br>MyTH4 domain) member 2 | PLEKHH2             | 1,77 |
| zinc finger protein 146                                                         | ZNF146              | 1,77 |
| glycosyltransferase 1 domain containing 1                                       | GLT1D1              | 1,77 |
| UDP-glucose ceramide glucosyltransferase                                        | UGCG                | 1,77 |
| vaccinia related kinase 2                                                       | VRK2                | 1,77 |
| galactose-3-O-sulfotransferase 2                                                | GAL3ST2             | 1,76 |
| Memczak2013 ANTISENSE, coding, INTERNAL, UTR3 best<br>transcript NM_001001349   | NKIRAS2             | 1,76 |
| ankyrin repeat and LEM domain containing 2                                      | ANKLE2              | 1,76 |
| solute carrier family 3 (amino acid transporter heavy<br>chain), member 2       | SLC3A2              | 1,76 |
| transcription elongation factor B (SIII), polypeptide 1<br>(15kDa, elongin C)   | TCEB1               | 1,76 |
| calpain, small subunit 1                                                        | CAPNS1              | 1,76 |
| ADP-ribosylation factor like GTPase 6 interacting protein<br>5                  | ARL6IP5             | 1,76 |
| Rho GDP dissociation inhibitor (GDI) alpha                                      | ARHGDIA             | 1,76 |
| WW domain binding protein 11                                                    | WBP11               | 1,76 |
| pescadillo ribosomal biogenesis factor 1                                        | PES1                | 1,76 |
| solute carrier family 29 (equilibrative nucleoside<br>transporter), member 1    | SLC29A1             | 1,76 |
| glycogen synthase kinase 3 beta                                                 | GSK3B               | 1,76 |
| zinc finger protein 85                                                          | ZNF85               | 1,76 |
| vacuolar protein sorting 16 homolog (S. cerevisiae)                             | VPS16               | 1,76 |
| immunity-related GTPase family, M                                               | IRGM                | 1,76 |
| nuclear receptor subfamily 4, group A, member 3                                 | NR4A3               | 1,76 |
| KIAA0040                                                                        | KIAA0040            | 1,76 |
| tumor necrosis factor receptor superfamily, member 1A                           | TNFRSF1A            | 1,76 |
| FK506 binding protein 6                                                         | FKBP6               | 1,76 |
| adaptor-related protein complex 2 sigma 1 subunit                               | AP2S1               | 1,76 |
| IWS1 homolog (S. cerevisiae)                                                    | IWS1                | 1,76 |
| pleckstrin homology domain containing, family O<br>member 1                     | PLEKHO1             | 1,76 |

|                                                                                                               |                      |      |
|---------------------------------------------------------------------------------------------------------------|----------------------|------|
| phytanoyl-CoA 2-hydroxylase interacting protein                                                               | PHYHIP               | 1,76 |
| thrombospondin 1                                                                                              | THBS1                | 1,76 |
| calneuron 1                                                                                                   | CALN1                | 1,76 |
| G-patch domain containing 2 like                                                                              | GPATCH2L             | 1,76 |
| zinc finger protein 530                                                                                       | ZNF530               | 1,76 |
| tetraspanin 14                                                                                                | TSPAN14              | 1,76 |
| inhibitor of DNA binding 2, dominant negative helix-loop-helix protein                                        | ID2                  | 1,76 |
| calpain 1, (mu/I) large subunit                                                                               | CAPN1                | 1,75 |
| interferon, alpha-inducible protein 27-like 2                                                                 | IFI27L2              | 1,75 |
| UTP14A small subunit (SSU) processome component                                                               | UTP14A               | 1,75 |
| protein tyrosine phosphatase, non-receptor type 23                                                            | PTPN23               | 1,75 |
| RecQ helicase-like                                                                                            | RECQL                | 1,75 |
| EFR3 homolog A                                                                                                | EFR3A                | 1,75 |
| carbonic anhydrase II                                                                                         | CA2                  | 1,75 |
| synuclein gamma                                                                                               | SNCG                 | 1,75 |
| SYS1-DBNDD2 readthrough (NMD candidate)                                                                       | SYS1-DBNDD2          | 1,75 |
| trafficking protein, kinesin binding 1                                                                        | TRAK1                | 1,75 |
| clarin 1                                                                                                      | CLRN1                | 1,75 |
| family with sequence similarity 160, member A1                                                                | FAM160A1             | 1,75 |
| exosome component 5                                                                                           | EXOSC5               | 1,75 |
| MLX interacting protein                                                                                       | MLXIP                | 1,75 |
| zinc finger, DHHC-type containing 3                                                                           | ZDHHC3               | 1,75 |
| autophagy related 7                                                                                           | ATG7                 | 1,75 |
| arylsulfatase G                                                                                               | ARSG                 | 1,75 |
| ubiquitin specific peptidase 36                                                                               | USP36                | 1,75 |
| Cbl proto-oncogene-like 1, E3 ubiquitin protein ligase                                                        | CBLL1                | 1,75 |
| methyltransferase like 6                                                                                      | METTL6               | 1,75 |
| UTP15, U3 small nucleolar ribonucleoprotein, homolog (S. cerevisiae)                                          | UTP15                | 1,75 |
| sprouty RTK signaling antagonist 4                                                                            | SPRY4                | 1,75 |
| myosin, heavy chain 9, non-muscle                                                                             | MYH9                 | 1,75 |
| GRINL1A complex locus 1; myocardial zonula adherens protein; polymerase (RNA) II (DNA directed) polypeptide M | GCOM1; MYZAP; POLR2M | 1,75 |
| mast cell immunoglobulin-like receptor 1                                                                      | MILR1                | 1,75 |
| pirin                                                                                                         | PIR                  | 1,75 |
| mitogen-activated protein kinase kinase kinase 6                                                              | MAP3K6               | 1,75 |
| regulatory associated protein of MTOR, complex 1                                                              | RPTOR                | 1,75 |
| A-Raf proto-oncogene, serine/threonine kinase                                                                 | ARAF                 | 1,75 |
| eukaryotic translation initiation factor 3, subunit D                                                         | EIF3D                | 1,75 |
| coagulation factor VIII, procoagulant component                                                               | F8                   | 1,75 |
| ras homolog family member G                                                                                   | RHOG                 | 1,75 |
| caspase recruitment domain family, member 16                                                                  | CARD16               | 1,75 |

|                                                                                |                    |      |
|--------------------------------------------------------------------------------|--------------------|------|
| Jeck2013 ANTISENSE, coding, INTERNAL, intronic best transcript NM_020973       | GBA3               | 1,74 |
| furin (paired basic amino acid cleaving enzyme)                                | FURIN              | 1,74 |
| Memczak2013 ANTISENSE, CDS, coding, INTERNAL best transcript NM_001109         | ADAM8              | 1,74 |
| presenilin 1                                                                   | PSEN1              | 1,74 |
| cyclin D binding myb-like transcription factor 1                               | DMTF1              | 1,74 |
| phosphatidylinositol-4,5-bisphosphate 3-kinase, catalytic subunit beta         | PIK3CB             | 1,74 |
| zinc finger protein-like 1                                                     | ZFPL1              | 1,74 |
| RAS and EF-hand domain containing                                              | RASEF              | 1,74 |
| ATPase, H <sup>+</sup> transporting, lysosomal 50/57kDa, V1 subunit H          | ATP6V1H            | 1,74 |
| UBX domain protein 10                                                          | UBXN10             | 1,74 |
| membrane bound O-acyltransferase domain containing 2                           | MBOAT2             | 1,74 |
| REX1, RNA exonuclease 1 homolog; microRNA 1909                                 | REXO1; MIR1909     | 1,74 |
| IQ motif containing F1                                                         | IQCF1              | 1,74 |
| fibrous sheath interacting protein 1                                           | FSIP1              | 1,74 |
| defender against cell death 1                                                  | DAD1               | 1,74 |
| family with sequence similarity 150, member B                                  | FAM150B            | 1,74 |
| trafficking protein, kinesin binding 2                                         | TRAK2              | 1,74 |
| solute carrier family 35, member G2                                            | SLC35G2            | 1,74 |
| steroid receptor RNA activator 1                                               | SRA1               | 1,74 |
| Ras association (RalGDS/AF-6) and pleckstrin homology domains 1                | RAPH1              | 1,74 |
| MDM4, p53 regulator                                                            | MDM4               | 1,74 |
| golgin A8 family, member E, pseudogene; golgin A8 family, member D, pseudogene | GOLGA8EP; GOLGA8DP | 1,73 |
| cleavage stimulation factor, 3 pre-RNA, subunit 2                              | CSTF2              | 1,73 |
| zinc finger protein 749                                                        | ZNF749             | 1,73 |
| phosphate cytidylyltransferase 1, choline, alpha                               | PCYT1A             | 1,73 |
| myosin VB                                                                      | MYO5B              | 1,73 |
| membrane associated ring finger 5                                              | MARCH5             | 1,73 |
| ribosome production factor 2 homolog                                           | RPF2               | 1,73 |
| WD repeat domain 26; microRNA 4742                                             | WDR26; MIR4742     | 1,73 |
| olfactory receptor, family 11, subfamily H, member 12                          | OR11H12            | 1,73 |
| SPC24, NDC80 kinetochore complex component                                     | SPC24              | 1,73 |
| zinc finger and BTB domain containing 8 opposite strand                        | ZBTB8OS            | 1,73 |
| repetin                                                                        | RPTN               | 1,73 |
| solute carrier family 4 (anion exchanger), member 1, adaptor protein           | SLC4A1AP           | 1,73 |
| ral guanine nucleotide dissociation stimulator-like 2                          | RGL2               | 1,73 |

|                                                                                                                                                |                             |      |
|------------------------------------------------------------------------------------------------------------------------------------------------|-----------------------------|------|
| Memczak2013 ANTISENSE, CDS, coding, INTERNAL best transcript NM_014959; Transcript Identified by AceView; novel transcript, antisense to CARD8 | CTC-453G23.8; CARD8; nekera | 1,73 |
| ribosomal RNA processing 9, small subunit (SSU) processome component, homolog (yeast)                                                          | RRP9                        | 1,73 |
| acid phosphatase 5, tartrate resistant                                                                                                         | ACP5                        | 1,73 |
| male-specific lethal 3 homolog (Drosophila)                                                                                                    | MSL3                        | 1,73 |
| IQ motif and Sec7 domain 2                                                                                                                     | IQSEC2                      | 1,73 |
| ELMO/CED-12 domain containing 3                                                                                                                | ELMOD3                      | 1,73 |
| potassium channel tetramerization domain containing 17                                                                                         | KCTD17                      | 1,73 |
| brain protein I3                                                                                                                               | BRI3                        | 1,72 |
| cholinergic receptor, nicotinic alpha 9                                                                                                        | CHRNA9                      | 1,72 |
| mitogen-activated protein kinase kinase kinase 5                                                                                               | MAP4K5                      | 1,72 |
| regulator of G-protein signaling 2                                                                                                             | RGS2                        | 1,72 |
| family with sequence similarity 135, member A                                                                                                  | FAM135A                     | 1,72 |
| transmembrane protein 131                                                                                                                      | TMEM131                     | 1,72 |
| epidermal growth factor receptor pathway substrate 8                                                                                           | EPS8                        | 1,72 |
| ATPase, H <sup>+</sup> transporting, lysosomal 38kDa, V0 subunit d1                                                                            | ATP6V0D1                    | 1,72 |
| AHA1, activator of heat shock 90kDa protein ATPase homolog 2 (yeast)                                                                           | AHSA2                       | 1,72 |
| scavenger receptor class F, member 2                                                                                                           | SCARF2                      | 1,72 |
| ligase IV, DNA, ATP-dependent                                                                                                                  | LIG4                        | 1,72 |
| ASB16 antisense RNA 1                                                                                                                          | ASB16-AS1                   | 1,72 |
| ataxin 2                                                                                                                                       | ATXN2                       | 1,72 |
| Rho family GTPase 1                                                                                                                            | RND1                        | 1,72 |
| DnaJ (Hsp40) homolog, subfamily C, member 13                                                                                                   | DNAJC13                     | 1,72 |
| SWT1 RNA endoribonuclease homolog                                                                                                              | SWT1                        | 1,72 |
| histone H4 transcription factor                                                                                                                | HINFP                       | 1,72 |
| DNA cross-link repair 1C                                                                                                                       | DCLRE1C                     | 1,72 |
| Rho GTPase activating protein 12                                                                                                               | ARHGAP12                    | 1,72 |
| chemokine (C-C motif) receptor 4                                                                                                               | CCR4                        | 1,72 |
| IMP (inosine 5-monophosphate) dehydrogenase 1                                                                                                  | IMPDH1                      | 1,72 |
| zinc finger protein 746                                                                                                                        | ZNF746                      | 1,72 |
| zinc finger protein 567                                                                                                                        | ZNF567                      | 1,72 |
| SHC SH2-domain binding protein 1                                                                                                               | SHCBP1                      | 1,72 |
| solute carrier family 9, subfamily A (NHE7, cation proton antiporter 7), member 7                                                              | SLC9A7                      | 1,72 |
| protein kinase (cAMP-dependent, catalytic) inhibitor gamma                                                                                     | PKIG                        | 1,72 |
| lysosomal-associated membrane protein 3                                                                                                        | LAMP3                       | 1,72 |
| secernin 1                                                                                                                                     | SCRN1                       | 1,72 |
| CEBPZ opposite strand                                                                                                                          | CEBPZOS                     | 1,72 |

|                                                                                                                                                                                                                                          |                                                |      |
|------------------------------------------------------------------------------------------------------------------------------------------------------------------------------------------------------------------------------------------|------------------------------------------------|------|
| EBNA1 binding protein 2; microRNA 6733                                                                                                                                                                                                   | EBNA1BP2;<br>MIR6733                           | 1,72 |
| argonaute RISC catalytic component 2                                                                                                                                                                                                     | ago-02                                         | 1,72 |
| phosphatidylinositol 4-kinase type 2 alpha                                                                                                                                                                                               | PI4K2A                                         | 1,72 |
| EMG1 N1-specific pseudouridine methyltransferase                                                                                                                                                                                         | EMG1                                           | 1,72 |
| testis-specific kinase 1; microRNA 4667                                                                                                                                                                                                  | TESK1; MIR4667                                 | 1,71 |
| RAR-related orphan receptor C                                                                                                                                                                                                            | RORC                                           | 1,71 |
| early endosome antigen 1                                                                                                                                                                                                                 | EEA1                                           | 1,71 |
| cadherin-like and PC-esterase domain containing 1                                                                                                                                                                                        | CPED1                                          | 1,71 |
| zinc finger, CCHC domain containing 6                                                                                                                                                                                                    | ZCCHC6                                         | 1,71 |
| guanine nucleotide binding protein-like 2 (nucleolar)                                                                                                                                                                                    | GNL2                                           | 1,71 |
| sperm acrosome associated 7                                                                                                                                                                                                              | SPACA7                                         | 1,71 |
| mitochondrial inner membrane organizing system 1                                                                                                                                                                                         | MINOS1                                         | 1,71 |
| opiate receptor-like 1                                                                                                                                                                                                                   | OPRL1                                          | 1,71 |
| tripartite motif containing 8                                                                                                                                                                                                            | TRIM8                                          | 1,71 |
| annexin A8-like 1; annexin A8                                                                                                                                                                                                            | ANXA8L1; ANXA8                                 | 1,71 |
| TRAF3 interacting protein 2                                                                                                                                                                                                              | TRAF3IP2                                       | 1,71 |
| TBC1 domain family, member 2B pseudogene; Transcript Identified by AceView, Entrez Gene ID(s) 646938                                                                                                                                     | LOC646938                                      | 1,71 |
| Memczak2013 ANTISENSE, coding, INTERNAL, intronic best transcript NM_001243234                                                                                                                                                           | TCF4                                           | 1,71 |
| transmembrane protein 14C                                                                                                                                                                                                                | TMEM14C                                        | 1,71 |
| D-dopachrome tautomerase                                                                                                                                                                                                                 | DDT                                            | 1,71 |
| KIAA0556                                                                                                                                                                                                                                 | KIAA0556                                       | 1,71 |
| transient receptor potential cation channel, subfamily V, member 3                                                                                                                                                                       | TRPV3                                          | 1,71 |
| breast cancer anti-estrogen resistance 1                                                                                                                                                                                                 | BCAR1                                          | 1,71 |
| tocopherol (alpha) transfer protein-like                                                                                                                                                                                                 | TTPAL                                          | 1,71 |
| Memczak2013 ALT_ACCEPTOR, ALT_DONOR, INTERNAL, intronic, ncRNA best transcript NR_037774                                                                                                                                                 | STAM                                           | 1,71 |
| PDZ and LIM domain 5                                                                                                                                                                                                                     | PDLIM5                                         | 1,71 |
| Memczak2013 ANTISENSE, CDS, coding, INTERNAL best transcript NM_003075                                                                                                                                                                   | SMARCC2                                        | 1,71 |
| APH1B gamma secretase subunit                                                                                                                                                                                                            | APH1B                                          | 1,71 |
| apoptosis, caspase activation inhibitor                                                                                                                                                                                                  | AVEN                                           | 1,71 |
| programmed cell death 1 ligand 2                                                                                                                                                                                                         | PDCD1LG2                                       | 1,71 |
| cancer/testis antigen family 47, member A5;<br>cancer/testis antigen family 47, member A2;<br>cancer/testis antigen family 47, member A1;<br>cancer/testis antigen family 47, member A11;<br>cancer/testis antigen family 47, member A12 | CT47A5; CT47A2;<br>CT47A1; CT47A11;<br>CT47A12 | 1,71 |
| IQ motif containing GTPase activating protein 3                                                                                                                                                                                          | IQGAP3                                         | 1,70 |
| tuftelin interacting protein 11                                                                                                                                                                                                          | TFIP11                                         | 1,70 |
| tubulin, alpha 1a                                                                                                                                                                                                                        | TUBA1A                                         | 1,70 |

|                                                                                              |                                |      |
|----------------------------------------------------------------------------------------------|--------------------------------|------|
| keratin associated protein 2-4                                                               | KRTAP2-4                       | 1,70 |
| tuftelin 1                                                                                   | TUFT1                          | 1,70 |
| UBA-like domain containing 2                                                                 | UBALD2                         | 1,70 |
| connector enhancer of kinase suppressor of Ras 1                                             | CNKSR1                         | 1,70 |
| metallothionein 1I, pseudogene                                                               | MT1IP                          | 1,70 |
| F-box and leucine-rich repeat protein 14                                                     | FBXL14                         | 1,70 |
| fasciculation and elongation protein zeta 2 (zygin II)                                       | FEZ2                           | 1,70 |
| adaptor-related protein complex 2, mu 1 subunit                                              | AP2M1                          | 1,70 |
| angiomotin like 2; microRNA 6827; ribosomal protein L39 pseudogene 5                         | AMOTL2;<br>MIR6827;<br>RPL39P5 | 1,70 |
| COMMD3-BMI1 readthrough; BMI1 proto-oncogene, polycomb ring finger; COMM domain containing 3 | COMMD3-BMI1;<br>BMI1; COMMD3   | 1,70 |
| serine palmitoyltransferase, small subunit B                                                 | SPTSSB                         | 1,70 |
| blood vessel epicardial substance                                                            | BVES                           | 1,70 |
| zinc finger, DHHC-type containing 9                                                          | ZDHHC9                         | 1,70 |
| EF-hand domain (C-terminal) containing 1                                                     | EFHC1                          | 1,70 |
| POTE ankyrin domain family, member M; POTE ankyrin domain family, member G                   | POTEM; POTE G                  | 1,70 |
| Wiskott-Aldrich syndrome-like                                                                | WASL                           | 1,70 |
| chromosome 4 open reading frame 36                                                           | C4orf36                        | 1,70 |
| fibronectin type III domain containing 4                                                     | FNDC4                          | 1,70 |
| eukaryotic translation initiation factor 2, subunit 1 alpha, 35kDa                           | EIF2S1                         | 1,70 |
| chromosome 5 open reading frame 30                                                           | C5orf30                        | 1,70 |
| regulator of G-protein signaling 14                                                          | RGS14                          | 1,70 |
| UDP-GlcNAc:betaGal beta-1,3-N-acetylglucosaminyltransferase 7                                | B3GNT7                         | 1,70 |
| POTE ankyrin domain family, member A                                                         | POTEA                          | 1,70 |
| forkhead-associated (FHA) phosphopeptide binding domain 1                                    | FHAD1                          | 1,70 |
| solute carrier family 6 (neurotransmitter transporter), member 2                             | SLC6A2                         | 1,70 |
| chromosome 12 open reading frame 71                                                          | C12orf71                       | 1,69 |
| glucose 6 phosphatase, catalytic, 3                                                          | G6PC3                          | 1,69 |
| keratin associated protein 1-3                                                               | KRTAP1-3                       | 1,69 |
| chromosome 6 open reading frame 136                                                          | C6orf136                       | 1,69 |
| HERPUD family member 2                                                                       | HERPUD2                        | 1,69 |
| sorting nexin 16                                                                             | SNX16                          | 1,69 |
| fatty acyl-CoA reductase 2 pseudogene 1                                                      | FAR2P1                         | 1,69 |
| small nuclear ribonucleoprotein D2 pseudogene 2                                              | SNRPD2P2                       | 1,69 |
| ATP binding cassette subfamily B member 9                                                    | ABCB9                          | 1,69 |
| small nuclear RNA activating complex polypeptide 4                                           | SNAPC4                         | 1,69 |
| H3 histone, family 3B (H3.3B)                                                                | H3F3B                          | 1,69 |
| dual specificity phosphatase 14                                                              | DUSP14                         | 1,69 |

|                                                                                                            |                               |      |
|------------------------------------------------------------------------------------------------------------|-------------------------------|------|
| MAX dimerization protein 1                                                                                 | MXD1                          | 1,69 |
| ubiquitin specific peptidase 17-like family member 21                                                      | USP17L21                      | 1,69 |
| zinc finger protein 79                                                                                     | ZNF79                         | 1,69 |
| poly(A) binding protein, cytoplasmic 1-like                                                                | PABPC1L                       | 1,69 |
| zinc finger protein 92                                                                                     | ZNF92                         | 1,69 |
| ribosomal protein S26                                                                                      | RPS26                         | 1,69 |
| methionine sulfoxide reductase B3                                                                          | MSRB3                         | 1,69 |
| proline and serine rich 3                                                                                  | PROSER3                       | 1,69 |
| septin 7                                                                                                   | sept-07                       | 1,69 |
| CDC42 effector protein (Rho GTPase binding) 3                                                              | CDC42EP3                      | 1,68 |
| numb homolog (Drosophila)                                                                                  | NUMB                          | 1,68 |
| ZNF816-ZNF321P readthrough                                                                                 | ZNF816-ZNF321P                | 1,68 |
| serine/threonine kinase 3                                                                                  | STK3                          | 1,68 |
| dual specificity tyrosine-(Y)-phosphorylation regulated kinase 3                                           | DYRK3                         | 1,68 |
| diaphanous-related formin 1                                                                                | DIAPH1                        | 1,68 |
| protein inhibitor of activated STAT 3                                                                      | PIAS3                         | 1,68 |
| bone morphogenetic protein receptor type II                                                                | BMPR2                         | 1,68 |
| Fas associated factor family member 2                                                                      | FAF2                          | 1,68 |
| family with sequence similarity 134, member A                                                              | FAM134A                       | 1,68 |
| zinc finger, BED-type containing 2                                                                         | ZBED2                         | 1,68 |
| nucleolar protein interacting with the FHA domain of MKI67                                                 | NIFK                          | 1,68 |
| DEF6 guanine nucleotide exchange factor                                                                    | DEF6                          | 1,68 |
| olfactory receptor, family 2, subfamily A, member 7; Rho guanine nucleotide exchange factor 34, pseudogene | OR2A7;<br>ARHGEF34P           | 1,68 |
| Rho guanine nucleotide exchange factor 5                                                                   | ARHGEF5                       | 1,68 |
| microsomal glutathione S-transferase 3                                                                     | MGST3                         | 1,68 |
| uncharacterized LOC100288748; novel transcript, antisense to ESRP1                                         | LOC100288748;<br>RP11-22C11.2 | 1,68 |
| seizure threshold 2 homolog (mouse)                                                                        | SZT2                          | 1,68 |
| syntaxin 12                                                                                                | STX12                         | 1,68 |
| growth differentiation factor 15                                                                           | GDF15                         | 1,68 |
| transmembrane protein 242                                                                                  | TMEM242                       | 1,68 |
| sialophorin                                                                                                | SPN                           | 1,68 |
| zinc finger protein 20                                                                                     | ZNF20                         | 1,68 |
| DiGeorge syndrome critical region gene 14                                                                  | DGCR14                        | 1,68 |
| DEAD (Asp-Glu-Ala-Asp) box polypeptide 41                                                                  | DDX41                         | 1,68 |
| allograft inflammatory factor 1                                                                            | AIF1                          | 1,68 |
| FSHD region gene 2                                                                                         | FRG2                          | 1,67 |
| ring finger protein 185                                                                                    | RNF185                        | 1,67 |
| chromosome 5 open reading frame 34                                                                         | C5orf34                       | 1,67 |
| Transcript Identified by AceView, Entrez Gene ID(s) 91057                                                  | CCDC34                        | 1,67 |



|                                                                              |                |      |
|------------------------------------------------------------------------------|----------------|------|
| GIN5 complex subunit 3 (Psf3 homolog)                                        | GIN53          | 1,67 |
| anaphase promoting complex subunit 13                                        | ANAPC13        | 1,67 |
| calcium activated nucleotidase 1                                             | CANT1          | 1,67 |
| family with sequence similarity 102, member A                                | FAM102A        | 1,67 |
| eukaryotic translation initiation factor 5                                   | EIF5           | 1,67 |
| major facilitator superfamily domain containing 5                            | MFSD5          | 1,67 |
| cullin 4A                                                                    | CUL4A          | 1,67 |
| ULK4 pseudogene 1; ULK4 pseudogene 2                                         | ULK4P1; ULK4P2 | 1,67 |
| kinesin family member C2                                                     | KIFC2          | 1,67 |
| ubiquitin specific peptidase 47                                              | USP47          | 1,67 |
| dynein, axonemal, heavy chain 11                                             | DNAH11         | 1,67 |
| zwilch kinetochore protein                                                   | ZWILCH         | 1,67 |
| zinc finger, DHHC-type containing 5                                          | ZDHHC5         | 1,67 |
| exosome component 1                                                          | EXOSC1         | 1,67 |
| par-6 family cell polarity regulator beta                                    | PARD6B         | 1,67 |
| v-ral simian leukemia viral oncogene homolog B                               | RALB           | 1,67 |
| serine incorporator 1                                                        | SERINC1        | 1,67 |
| zinc finger protein 560                                                      | ZNF560         | 1,67 |
| eukaryotic translation initiation factor 1                                   | EIF1           | 1,67 |
| RAB3D, member RAS oncogene family                                            | RAB3D          | 1,67 |
| coordinator of PRMT5, differentiation stimulator                             | COPRS          | 1,67 |
| tRNA methyltransferase 6                                                     | TRMT6          | 1,67 |
| coiled-coil domain containing 124                                            | CCDC124        | 1,67 |
| GRB2 associated regulator of MAPK1 1                                         | GAREM1         | 1,67 |
| forkhead box C1                                                              | FOXC1          | 1,67 |
| chromosome 11 open reading frame 24                                          | C11orf24       | 1,66 |
| SWAP switching B-cell complex 70kDa subunit                                  | SWAP70         | 1,66 |
| TRAF interacting protein                                                     | TRAIP          | 1,66 |
| ubiquitin specific peptidase 17-like family member 7                         | USP17L7        | 1,66 |
| heme binding protein 2                                                       | HEBP2          | 1,66 |
| chromosome 19 open reading frame 70                                          | C19orf70       | 1,66 |
| yrDC N(6)-threonylcarbamoyltransferase domain containing                     | YRDC           | 1,66 |
| PHD finger protein 20-like 1                                                 | PHF20L1        | 1,66 |
| proopiomelanocortin                                                          | POMC           | 1,66 |
| ADP-ribosylarginine hydrolase                                                | ADPRH          | 1,66 |
| alkaline ceramidase 3                                                        | ACER3          | 1,66 |
| cofilin 1 (non-muscle)                                                       | CFL1           | 1,66 |
| EP300 interacting inhibitor of differentiation 1                             | EID1           | 1,66 |
| ER membrane-associated RNA degradation                                       | ERMARD         | 1,66 |
| centrosomal protein 85kDa                                                    | CEP85          | 1,66 |
| TATA box binding protein (TBP)-associated factor, RNA polymerase I, A, 48kDa | TAF1A          | 1,66 |
| ubiquitin specific peptidase 17-like family member 22                        | USP17L22       | 1,66 |

|                                                                                                 |               |      |
|-------------------------------------------------------------------------------------------------|---------------|------|
| potassium channel, calcium activated intermediate/small conductance subfamily N alpha, member 4 | KCNN4         | 1,66 |
| zinc finger protein 34                                                                          | ZNF34         | 1,66 |
| CDC like kinase 4                                                                               | CLK4          | 1,66 |
| shootin 1                                                                                       | SHTN1         | 1,66 |
| WAS protein family, member 2                                                                    | WASF2         | 1,66 |
| enolase superfamily member 1                                                                    | ENOSF1        | 1,66 |
| RELT tumor necrosis factor receptor                                                             | RELT          | 1,66 |
| sphingosine kinase 2                                                                            | SPHK2         | 1,66 |
| tryptase beta 2 (gene/pseudogene); tryptase alpha/beta 1                                        | TPSB2; TPSAB1 | 1,66 |
| folate receptor 3 (gamma)                                                                       | FOLR3         | 1,66 |
| jumonji domain containing 1C                                                                    | JMJD1C        | 1,66 |
| Transcript Identified by AceView, Entrez Gene ID(s) 56261                                       | GPCPD1        | 1,66 |
| chromosome 1 open reading frame 54                                                              | C1orf54       | 1,66 |
| stonin 2                                                                                        | STON2         | 1,66 |
| crystallin zeta                                                                                 | CRYZ          | 1,66 |
| FBJ murine osteosarcoma viral oncogene homolog                                                  | FOS           | 1,66 |
| 2-5-oligoadenylate synthetase 3                                                                 | OAS3          | 1,65 |
| protein phosphatase, Mg <sup>2+</sup> /Mn <sup>2+</sup> dependent, 1N (putative)                | PPM1N         | 1,65 |
| coiled-coil domain containing 84                                                                | CCDC84        | 1,65 |
| BAI1-associated protein 2                                                                       | BAIAP2        | 1,65 |
| polynucleotide kinase 3-phosphatase                                                             | PNKP          | 1,65 |
| G-patch domain containing 4                                                                     | GPATCH4       | 1,65 |
| TNFRSF1A-associated via death domain                                                            | TRADD         | 1,65 |
| DDB1 and CUL4 associated factor 15                                                              | DCAF15        | 1,65 |
| BCL2-like 15                                                                                    | BCL2L15       | 1,65 |
| glucosaminyl (N-acetyl) transferase 4, core 2                                                   | GCNT4         | 1,65 |
| topoisomerase (DNA) I                                                                           | TOP1          | 1,65 |
| synovial sarcoma, X breakpoint 9                                                                | SSX9          | 1,65 |
| formin 1                                                                                        | FMN1          | 1,65 |
| breast cancer 1, early onset                                                                    | BRCA1         | 1,65 |
| ganglioside induced differentiation associated protein 2                                        | GDAP2         | 1,65 |
| intestine-specific homeobox                                                                     | ISX           | 1,65 |
| basic helix-loop-helix family, member a15                                                       | BHLHA15       | 1,65 |
| C2 calcium-dependent domain containing 3                                                        | C2CD3         | 1,65 |
| autophagy related 16-like 1                                                                     | ATG16L1       | 1,65 |
| zinc finger, FYVE domain containing 26                                                          | ZFYVE26       | 1,65 |
| alpha- and gamma-adaptin binding protein                                                        | AAGAB         | 1,65 |
| brevican                                                                                        | BCAN          | 1,65 |
| transmembrane protein 8A                                                                        | TMEM8A        | 1,65 |
| calreticulin 3                                                                                  | CALR3         | 1,65 |

|                                                                                                                                                                                                                                                                                                                                                                     |               |      |
|---------------------------------------------------------------------------------------------------------------------------------------------------------------------------------------------------------------------------------------------------------------------------------------------------------------------------------------------------------------------|---------------|------|
| potassium channel subfamily M regulatory beta subunit 4                                                                                                                                                                                                                                                                                                             | KCNMB4        | 1,65 |
| lactamase, beta 2                                                                                                                                                                                                                                                                                                                                                   | LACTB2        | 1,65 |
| hydroxycarboxylic acid receptor 1                                                                                                                                                                                                                                                                                                                                   | HCAR1         | 1,65 |
| membrane magnesium transporter 1                                                                                                                                                                                                                                                                                                                                    | MMGT1         | 1,65 |
| low density lipoprotein receptor adaptor protein 1                                                                                                                                                                                                                                                                                                                  | LDLRAP1       | 1,64 |
| adhesion regulating molecule 1                                                                                                                                                                                                                                                                                                                                      | ADRM1         | 1,64 |
| early growth response 2                                                                                                                                                                                                                                                                                                                                             | EGR2          | 1,64 |
| death-associated protein kinase 3; microRNA 637                                                                                                                                                                                                                                                                                                                     | DAPK3; MIR637 | 1,64 |
| SPT20 homolog, SAGA complex component                                                                                                                                                                                                                                                                                                                               | SUPT20H       | 1,64 |
| carbohydrate sulfotransferase 10                                                                                                                                                                                                                                                                                                                                    | CHST10        | 1,64 |
| SH3-domain binding protein 4                                                                                                                                                                                                                                                                                                                                        | SH3BP4        | 1,64 |
| rhomboid domain containing 1                                                                                                                                                                                                                                                                                                                                        | RHBDD1        | 1,64 |
| Homo sapiens family with sequence similarity 103, member A1, mRNA (cDNA clone MGC:2560 IMAGE:2989772), complete cds.; Homo sapiens family with sequence similarity 103, member A1, mRNA (cDNA clone MGC:18029 IMAGE:3924570), complete cds.; Homo sapiens family with sequence similarity 103, member A1, mRNA (cDNA clone MGC:102778 IMAGE:5578103), complete cds. | FAM103A1      | 1,64 |
| DR1-associated protein 1 (negative cofactor 2 alpha)                                                                                                                                                                                                                                                                                                                | DRAP1         | 1,64 |
| MRT4 homolog, ribosome maturation factor                                                                                                                                                                                                                                                                                                                            | MRT04         | 1,64 |
| lectin, galactoside-binding, soluble, 8                                                                                                                                                                                                                                                                                                                             | LGALS8        | 1,64 |
| poly(rC) binding protein 4                                                                                                                                                                                                                                                                                                                                          | PCBP4         | 1,64 |
| seryl-tRNA synthetase                                                                                                                                                                                                                                                                                                                                               | SARS          | 1,64 |
| G elongation factor, mitochondrial 2                                                                                                                                                                                                                                                                                                                                | GFM2          | 1,64 |
| GTP binding protein 4                                                                                                                                                                                                                                                                                                                                               | GTPBP4        | 1,64 |
| protein kinase C, zeta                                                                                                                                                                                                                                                                                                                                              | PRKCZ         | 1,64 |
| transmembrane protein 184C                                                                                                                                                                                                                                                                                                                                          | TMEM184C      | 1,64 |
| DNA cross-link repair 1B                                                                                                                                                                                                                                                                                                                                            | DCLRE1B       | 1,64 |
| flightless I actin binding protein                                                                                                                                                                                                                                                                                                                                  | FLII          | 1,64 |
| tumor protein D52-like 2                                                                                                                                                                                                                                                                                                                                            | TPD52L2       | 1,64 |
| calbindin 2                                                                                                                                                                                                                                                                                                                                                         | CALB2         | 1,64 |
| vacuolar protein sorting 39 homolog (S. cerevisiae)                                                                                                                                                                                                                                                                                                                 | VPS39         | 1,64 |
| protein phosphatase 3, catalytic subunit, gamma isozyme                                                                                                                                                                                                                                                                                                             | PPP3CC        | 1,64 |
| leucine rich repeat (in FLII) interacting protein 2                                                                                                                                                                                                                                                                                                                 | LRRFIP2       | 1,64 |
| arginine/serine-rich protein 1                                                                                                                                                                                                                                                                                                                                      | RSRP1         | 1,64 |
| annexin A5                                                                                                                                                                                                                                                                                                                                                          | ANXA5         | 1,64 |
| potassium channel, voltage gated eag related subfamily H, member 3                                                                                                                                                                                                                                                                                                  | KCNH3         | 1,64 |
| thioredoxin                                                                                                                                                                                                                                                                                                                                                         | TXN           | 1,64 |
| matrix metalloproteinase 7                                                                                                                                                                                                                                                                                                                                          | MMP7          | 1,64 |

|                                                                                 |                 |      |
|---------------------------------------------------------------------------------|-----------------|------|
| Transcript Identified by AceView, Entrez Gene ID(s)<br>728833                   | FAM72D          | 1,64 |
| mitogen-activated protein kinase 11                                             | MAPK11          | 1,63 |
| ets variant 3                                                                   | ETV3            | 1,63 |
| mirror-image polydactyly 1                                                      | MIPOL1          | 1,63 |
| C-type lectin domain family 16, member A                                        | CLEC16A         | 1,63 |
| family with sequence similarity 53, member C                                    | FAM53C          | 1,63 |
| interferon, alpha 14                                                            | IFNA14          | 1,63 |
| long intergenic non-protein coding RNA 337                                      | LINC00337       | 1,63 |
| syntaxin binding protein 3                                                      | STXBP3          | 1,63 |
| myotubularin related protein 6                                                  | MTMR6           | 1,63 |
| ATP binding cassette subfamily C member 10                                      | ABCC10          | 1,63 |
| linker for activation of T-cells family member 2                                | LAT2            | 1,63 |
| small proline-rich protein 2A                                                   | SPRR2A          | 1,63 |
| formin binding protein 1-like                                                   | FNBP1L          | 1,63 |
| poliovirus receptor                                                             | PVR             | 1,63 |
| cyclin T1                                                                       | CCNT1           | 1,63 |
| nuclear RNA export factor 1                                                     | NXF1            | 1,63 |
| tripartite motif containing 32                                                  | TRIM32          | 1,63 |
| proteasome 26S subunit, non-ATPase 14                                           | PSMD14          | 1,63 |
| RNA binding motif, single stranded interacting protein 3                        | RBMS3           | 1,63 |
| tyrosine 3-monooxygenase/tryptophan 5-monooxygenase<br>activation protein, zeta | YWHAZ           | 1,63 |
| zinc finger protein 519                                                         | ZNF519          | 1,63 |
| desmoglein 2                                                                    | DSG2            | 1,63 |
| carboxypeptidase A1 (pancreatic)                                                | CPA1            | 1,63 |
| zinc finger protein 256                                                         | ZNF256          | 1,63 |
| family with sequence similarity 110, member C                                   | FAM110C         | 1,63 |
| Zic family member 5                                                             | ZIC5            | 1,63 |
| ubiquitin conjugating enzyme E2D 1                                              | UBE2D1          | 1,63 |
| NEDD4 binding protein 1                                                         | N4BP1           | 1,63 |
| FK506 binding protein 1A; microRNA 6869                                         | FKBP1A; MIR6869 | 1,63 |
| cytochrome P450, family 3, subfamily A, polypeptide 4                           | CYP3A4          | 1,63 |
| protein kinase, cGMP-dependent, type II                                         | PRKG2           | 1,63 |
| coenzyme Q4                                                                     | COQ4            | 1,63 |
| coiled-coil domain containing 179                                               | CCDC179         | 1,63 |
| solute carrier family 12 (sodium/potassium/chloride<br>transporter), member 2   | SLC12A2         | 1,63 |
| SH3-domain GRB2-like endophilin B2                                              | SH3GLB2         | 1,63 |
| adaptor-related protein complex 3, sigma 2 subunit;<br>microRNA 5009            | AP3S2; MIR5009  | 1,63 |
| histone cluster 1, H2bk                                                         | HIST1H2BK       | 1,63 |
| mitogen-activated protein kinase associated protein 1                           | MAPKAP1         | 1,63 |

|                                                                                                                                                                                                                                                                                                                                                                                          |          |      |
|------------------------------------------------------------------------------------------------------------------------------------------------------------------------------------------------------------------------------------------------------------------------------------------------------------------------------------------------------------------------------------------|----------|------|
| Homo sapiens ribosomal protein S26, mRNA (cDNA clone MGC:27148 IMAGE:4807004), complete cds.; Homo sapiens ribosomal protein S26, mRNA (cDNA clone MGC:88201 IMAGE:6388128), complete cds.; Homo sapiens ribosomal protein S26, mRNA (cDNA clone MGC:104291 IMAGE:4287636), complete cds.; Homo sapiens ribosomal protein S26, mRNA (cDNA clone MGC:104292 IMAGE:6726218), complete cds. | RPS26    | 1,63 |
| ribonuclease L (2,5-oligoadenylate synthetase-dependent)                                                                                                                                                                                                                                                                                                                                 | RNASEL   | 1,63 |
| EF-hand calcium binding domain 13                                                                                                                                                                                                                                                                                                                                                        | EFCAB13  | 1,63 |
| SATB homeobox 2                                                                                                                                                                                                                                                                                                                                                                          | SATB2    | 1,62 |
| MAX network transcriptional repressor                                                                                                                                                                                                                                                                                                                                                    | MNT      | 1,62 |
| RAD51 paralog C                                                                                                                                                                                                                                                                                                                                                                          | RAD51C   | 1,62 |
| ring finger protein 43                                                                                                                                                                                                                                                                                                                                                                   | RNF43    | 1,62 |
| Vac14 homolog (S. cerevisiae)                                                                                                                                                                                                                                                                                                                                                            | VAC14    | 1,62 |
| actin filament associated protein 1                                                                                                                                                                                                                                                                                                                                                      | AFAP1    | 1,62 |
| cerebellar degeneration-related protein 2-like                                                                                                                                                                                                                                                                                                                                           | CDR2L    | 1,62 |
| WD repeat domain 53                                                                                                                                                                                                                                                                                                                                                                      | WDR53    | 1,62 |
| mitochondrial ribosomal protein L21                                                                                                                                                                                                                                                                                                                                                      | MRPL21   | 1,62 |
| syntaxin 16                                                                                                                                                                                                                                                                                                                                                                              | STX16    | 1,62 |
| survival of motor neuron 1, telomeric                                                                                                                                                                                                                                                                                                                                                    | SMN1     | 1,62 |
| NIPA-like domain containing 1                                                                                                                                                                                                                                                                                                                                                            | NIPAL1   | 1,62 |
| dynein, axonemal, assembly factor 1                                                                                                                                                                                                                                                                                                                                                      | DNAAF1   | 1,62 |
| folliculin interacting protein 1                                                                                                                                                                                                                                                                                                                                                         | FNIP1    | 1,62 |
| chromosome alignment maintaining phosphoprotein 1                                                                                                                                                                                                                                                                                                                                        | CHAMP1   | 1,62 |
| FGGY carbohydrate kinase domain containing                                                                                                                                                                                                                                                                                                                                               | FGGY     | 1,62 |
| carbohydrate (N-acetylglucosamine-6-O) sulfotransferase 2                                                                                                                                                                                                                                                                                                                                | CHST2    | 1,62 |
| abhydrolase domain containing 5                                                                                                                                                                                                                                                                                                                                                          | ABHD5    | 1,62 |
| ATPase type 13A3                                                                                                                                                                                                                                                                                                                                                                         | ATP13A3  | 1,62 |
| RAB5A, member RAS oncogene family                                                                                                                                                                                                                                                                                                                                                        | RAB5A    | 1,62 |
| basic helix-loop-helix and HMG box domain containing 1                                                                                                                                                                                                                                                                                                                                   | BHMG1    | 1,62 |
| myosin light chain 6                                                                                                                                                                                                                                                                                                                                                                     | MYL6     | 1,62 |
| pleckstrin homology domain containing, family M (with RUN domain) member 2                                                                                                                                                                                                                                                                                                               | PLEKHM2  | 1,62 |
| THAP domain containing 10                                                                                                                                                                                                                                                                                                                                                                | THAP10   | 1,62 |
| meningioma expressed antigen 5 (hyaluronidase)                                                                                                                                                                                                                                                                                                                                           | MGEA5    | 1,62 |
| histidyl-tRNA synthetase 2, mitochondrial                                                                                                                                                                                                                                                                                                                                                | HARS2    | 1,62 |
| BCL2-associated agonist of cell death                                                                                                                                                                                                                                                                                                                                                    | BAD      | 1,62 |
| zinc finger protein 335                                                                                                                                                                                                                                                                                                                                                                  | ZNF335   | 1,62 |
| amyotrophic lateral sclerosis 2 chromosome region candidate 12                                                                                                                                                                                                                                                                                                                           | ALS2CR12 | 1,62 |
| tropomyosin 3                                                                                                                                                                                                                                                                                                                                                                            | TPM3     | 1,62 |
| zinc finger protein 730                                                                                                                                                                                                                                                                                                                                                                  | ZNF730   | 1,62 |

|                                                                                                                             |                |      |
|-----------------------------------------------------------------------------------------------------------------------------|----------------|------|
| EF-hand domain family, member B                                                                                             | EFHB           | 1,62 |
| von Willebrand factor A domain containing 5A                                                                                | VWA5A          | 1,62 |
| PAK1 interacting protein 1                                                                                                  | PAK1IP1        | 1,62 |
| autophagy related 16-like 1                                                                                                 | ATG16L1        | 1,62 |
| prolyl endopeptidase-like                                                                                                   | PREPL          | 1,61 |
| late cornified envelope 1B                                                                                                  | LCE1B          | 1,61 |
| CDC28 protein kinase regulatory subunit 2                                                                                   | CKS2           | 1,61 |
| axin interactor, dorsalization associated                                                                                   | AIDA           | 1,61 |
| neuroblastoma 1, DAN family BMP antagonist                                                                                  | NBL1           | 1,61 |
| zinc finger protein 557                                                                                                     | ZNF557         | 1,61 |
| kinesin heavy chain member 2A                                                                                               | KIF2A          | 1,61 |
| cathepsin D                                                                                                                 | CTSD           | 1,61 |
| stanniocalcin 1                                                                                                             | STC1           | 1,61 |
| sorting nexin 8; microRNA 6836                                                                                              | SNX8; MIR6836  | 1,61 |
| SAP domain containing ribonucleoprotein                                                                                     | SARNP          | 1,61 |
| mannosyl (alpha-1,3-)-glycoprotein beta-1,4-N-acetylglucosaminyltransferase, isozyme B                                      | MGAT4B         | 1,61 |
| eukaryotic translation initiation factor 1B                                                                                 | EIF1B          | 1,61 |
| gamma-aminobutyric acid (GABA) A receptor, beta 3                                                                           | GABRB3         | 1,61 |
| lysophospholipase II                                                                                                        | LYPLA2         | 1,61 |
| keratin 15, type I; microRNA 6510                                                                                           | KRT15; MIR6510 | 1,61 |
| ubiquitin specific peptidase 15; microRNA 6125                                                                              | USP15; MIR6125 | 1,61 |
| regenerating islet-derived 1 beta                                                                                           | REG1B          | 1,61 |
| rhomboid domain containing 2                                                                                                | RHBDD2         | 1,61 |
| TYRO protein tyrosine kinase binding protein                                                                                | TYROBP         | 1,61 |
| sarcoglycan alpha                                                                                                           | SGCA           | 1,61 |
| mitochondrial ribosomal protein S10                                                                                         | MRPS10         | 1,61 |
| casein kinase 1, delta                                                                                                      | CSNK1D         | 1,61 |
| tumor protein p53 binding protein 1                                                                                         | TP53BP1        | 1,61 |
| peptidylprolyl isomerase H (cyclophilin H)                                                                                  | PPIH           | 1,61 |
| serine/threonine kinase 32C                                                                                                 | STK32C         | 1,61 |
| RAB11A, member RAS oncogene family                                                                                          | RAB11A         | 1,61 |
| p21 protein (Cdc42/Rac)-activated kinase 2                                                                                  | PAK2           | 1,61 |
| ADP-ribosylation factor related protein 1                                                                                   | ARFRP1         | 1,61 |
| V-set and immunoglobulin domain containing 2                                                                                | VSIG2          | 1,61 |
| denticleless E3 ubiquitin protein ligase homolog (Drosophila)                                                               | DTL            | 1,61 |
| phosphodiesterase 6C, cGMP-specific, cone, alpha prime                                                                      | PDE6C          | 1,61 |
| phosducin like 3                                                                                                            | PDCL3          | 1,61 |
| hypoxia inducible factor 1, alpha subunit (basic helix-loop-helix transcription factor)                                     | HIF1A          | 1,61 |
| Memczak2013 ALT_ACCEPTOR, ALT_DONOR, coding, INTERNAL, intronic best transcript NM_020772; Transcript Identified by AceView | NUFIP2; rerdy  | 1,61 |

|                                                                                             |                           |      |
|---------------------------------------------------------------------------------------------|---------------------------|------|
| WD repeat domain 77                                                                         | WDR77                     | 1,61 |
| mutS homolog 5; MSH5-SAPCD1 readthrough (NMD candidate); suppressor APC domain containing 1 | MSH5; MSH5-SAPCD1; SAPCD1 | 1,61 |
| methyl-CpG binding domain protein 1                                                         | MBD1                      | 1,61 |
| DNA-damage regulated autophagy modulator 2                                                  | DRAM2                     | 1,61 |
| epithelial splicing regulatory protein 2; microRNA 6773                                     | ESRP2; MIR6773            | 1,60 |
| serine/threonine kinase 38                                                                  | STK38                     | 1,60 |
| filaggrin                                                                                   | FLG                       | 1,60 |
| M-phase phosphoprotein 6                                                                    | MPHOSPH6                  | 1,60 |
| zinc finger and SCAN domain containing 21                                                   | ZSCAN21                   | 1,60 |
| interleukin 10                                                                              | IL10                      | 1,60 |
| ATPase, H <sup>+</sup> transporting, lysosomal 38kDa, V0 subunit d2                         | ATP6V0D2                  | 1,60 |
| transmembrane protein 50A                                                                   | TMEM50A                   | 1,60 |
| glucokinase (hexokinase 4) regulator                                                        | GCKR                      | 1,60 |
| developmentally regulated GTP binding protein 2                                             | DRG2                      | 1,60 |
| GEM interacting protein                                                                     | GMIP                      | 1,60 |
| K(lysine) acetyltransferase 2B                                                              | KAT2B                     | 1,60 |
| zinc finger protein 260                                                                     | ZNF260                    | 1,60 |
| fatty acid 2-hydroxylase                                                                    | FA2H                      | 1,60 |
| proteasome subunit beta 3                                                                   | PSMB3                     | 1,60 |
| synovial sarcoma, X breakpoint 4B; synovial sarcoma, X breakpoint 4                         | SSX4B; SSX4               | 1,60 |
| CDKN1A interacting zinc finger protein 1                                                    | CIZ1                      | 1,60 |
| v-rel avian reticuloendotheliosis viral oncogene homolog B                                  | RELB                      | 1,60 |
| DET1 and DDB1 associated 1                                                                  | DDA1                      | 1,60 |
| karyopherin alpha 3 (importin alpha 4)                                                      | KPNA3                     | 1,60 |
| annexin A7                                                                                  | ANXA7                     | 1,60 |
| myeloid leukemia factor 1                                                                   | MLF1                      | 1,60 |
| CD40 molecule, TNF receptor superfamily member 5                                            | CD40                      | 1,60 |
| MLX interacting protein                                                                     | MLXIP                     | 1,60 |
| interleukin 17 receptor D                                                                   | IL17RD                    | 1,60 |
| SPT5 homolog, DSIF elongation factor subunit                                                | SUPT5H                    | 1,60 |
| solute carrier family 16, member 14                                                         | SLC16A14                  | 1,60 |
| cytoplasmic polyadenylation element binding protein 2                                       | CPEB2                     | 1,60 |
| thioredoxin domain containing 17                                                            | TXNDC17                   | 1,60 |
| solute carrier family 25 (aspartate/glutamate carrier), member 12                           | SLC25A12                  | 1,60 |
| formin 1                                                                                    | FMN1                      | 1,60 |
| 5-hydroxytryptamine (serotonin) receptor 3C, ionotropic                                     | HTR3C                     | 1,60 |
| HSPA (heat shock 70kDa) binding protein, cytoplasmic cochaperone 1                          | HSPBP1                    | 1,60 |
| kelch-like family member 12                                                                 | KLHL12                    | 1,60 |

|                                                                                         |           |      |
|-----------------------------------------------------------------------------------------|-----------|------|
| protein kinase, AMP-activated, gamma 2 non-catalytic subunit                            | PRKAG2    | 1,60 |
| ankyrin repeat domain 20 family, member A1                                              | ANKRD20A1 | 1,60 |
| beta-1,4-N-acetyl-galactosaminyl transferase 1                                          | B4GALNT1  | 1,60 |
| CD44 molecule (Indian blood group)                                                      | CD44      | 1,60 |
| zinc finger protein 506                                                                 | ZNF506    | 1,60 |
| POTE ankyrin domain family, member J                                                    | POTEJ     | 1,60 |
| UbiA prenyltransferase domain containing 1                                              | UBIAD1    | 1,60 |
| nuclear pore complex interacting protein family, member B11                             | NPIPB11   | 1,59 |
| poly(rC) binding protein 3                                                              | PCBP3     | 1,59 |
| Zhang2013 ALT_ACCEPTOR, ALT_DONOR, coding, INTERNAL, intronic best transcript NM_002224 | ITPR3     | 1,59 |
| zinc finger protein 81                                                                  | ZNF81     | 1,59 |
| caudal type homeobox 2                                                                  | CDX2      | 1,59 |
| HEAT repeat containing 5B                                                               | HEATR5B   | 1,59 |
| PR domain containing 2, with ZNF domain                                                 | PRDM2     | 1,59 |
| ubiquitin-conjugating enzyme E2E 3                                                      | UBE2E3    | 1,59 |
| twinfilin actin binding protein 1                                                       | TWF1      | 1,59 |
| methylphosphate capping enzyme                                                          | MEPCE     | 1,59 |
| ELK1, member of ETS oncogene family                                                     | ELK1      | 1,59 |
| GPN-loop GTPase 1                                                                       | GPN1      | 1,59 |
| popeye domain containing 2                                                              | POPDC2    | 1,59 |
| zinc finger homeobox 4                                                                  | ZFHX4     | 1,59 |
| adhesion molecule, interacts with CXADR antigen 1                                       | AMICA1    | 1,59 |
| UEV and lactate/malate dehydrogenase domains                                            | UEVLD     | 1,59 |
| UV radiation resistance associated                                                      | UVRAG     | 1,59 |
| single-stranded DNA binding protein 1, mitochondrial                                    | SSBP1     | 1,59 |
| inositol polyphosphate-5-phosphatase E                                                  | INPP5E    | 1,59 |
| family with sequence similarity 9, member C                                             | FAM9C     | 1,59 |
| WAS/WASL interacting protein family, member 2                                           | WIPF2     | 1,59 |
| huntingtin                                                                              | HTT       | 1,59 |
| TSR3, 20S rRNA accumulation, homolog (S. cerevisiae)                                    | TSR3      | 1,59 |
| oral cancer overexpressed 1                                                             | ORAOV1    | 1,59 |
| sterile alpha motif domain containing 4A                                                | SAMD4A    | 1,59 |
| coiled-coil-helix-coiled-coil-helix domain containing 10                                | CHCHD10   | 1,59 |
| nuclear factor I/B                                                                      | NFIB      | 1,59 |
| ankyrin repeat domain 13 family, member D                                               | ANKRD13D  | 1,59 |
| four jointed box 1                                                                      | FJX1      | 1,59 |
| biliverdin reductase A                                                                  | BLVRA     | 1,59 |
| 5-3 exoribonuclease 2                                                                   | XRN2      | 1,59 |
| sperm antigen with calponin homology and coiled-coil domains 1                          | SPECC1    | 1,59 |
| myozenin 2                                                                              | MYOZ2     | 1,59 |
| isocitrate dehydrogenase 3 (NAD+) gamma                                                 | IDH3G     | 1,59 |



|                                                                                                                        |              |      |
|------------------------------------------------------------------------------------------------------------------------|--------------|------|
| Memczak2013 ALT_ACCEPTOR, ALT_DONOR, coding, INTERNAL, intronic best transcript NM_001098797                           | TOX2         | 1,59 |
| ring finger protein 146                                                                                                | RNF146       | 1,58 |
| polymerase (DNA-directed), epsilon 4, accessory subunit                                                                | POLE4        | 1,58 |
| BAI1-associated protein 2-like 2                                                                                       | BAIAP2L2     | 1,58 |
| ubiquitin specific peptidase 12                                                                                        | USP12        | 1,58 |
| ring finger protein 167                                                                                                | RNF167       | 1,58 |
| peroxisome proliferator-activated receptor gamma, coactivator 1 beta                                                   | PPARGC1B     | 1,58 |
| late cornified envelope 1F                                                                                             | LCE1F        | 1,58 |
| potassium channel, voltage gated subfamily E regulatory beta subunit 5; acyl-CoA synthetase long-chain family member 4 | KCNE5; ACSL4 | 1,58 |
| NOC2-like nucleolar associated transcriptional repressor                                                               | NOC2L        | 1,58 |
| striatin, calmodulin binding protein 3                                                                                 | STRN3        | 1,58 |
| Memczak2013 ANTISENSE, coding, INTERNAL, UTR3 best transcript NM_004475                                                | FLOT2        | 1,58 |
| cathepsin A                                                                                                            | CTSA         | 1,58 |
| missing oocyte, meiosis regulator, homolog (Drosophila)                                                                | MIOS         | 1,58 |
| breast cancer metastasis suppressor 1                                                                                  | BRMS1        | 1,58 |
| GDNF-inducible zinc finger protein 1                                                                                   | GZF1         | 1,58 |
| syndecan 1                                                                                                             | SDC1         | 1,58 |
| phospholipid phosphatase related 2                                                                                     | PLPPR2       | 1,58 |
| perilipin 3                                                                                                            | PLIN3        | 1,58 |
| coiled-coil domain containing 82                                                                                       | CCDC82       | 1,58 |
| vacuolar protein sorting 8 homolog (S. cerevisiae)                                                                     | VPS8         | 1,58 |
| centromere protein O                                                                                                   | CENPO        | 1,58 |
| LIM and SH3 protein 1                                                                                                  | LASP1        | 1,58 |
| ring finger protein 145                                                                                                | RNF145       | 1,58 |
| chorionic somatomammotropin hormone 2                                                                                  | CSH2         | 1,58 |
| capping protein (actin filament) muscle Z-line, alpha 1                                                                | CAPZA1       | 1,58 |
| leucine-rich repeat LGI family, member 3                                                                               | LGI3         | 1,58 |
| ELF1 homolog, elongation factor 1                                                                                      | ELOF1        | 1,58 |
| bridging integrator 3                                                                                                  | BIN3         | 1,58 |
| zinc finger protein 850                                                                                                | ZNF850       | 1,58 |
| RAS p21 protein activator 2                                                                                            | RASA2        | 1,58 |
| nitrilase 1                                                                                                            | NIT1         | 1,58 |
| general transcription factor IIE subunit 2                                                                             | GTF2E2       | 1,58 |
| SET domain containing 1B                                                                                               | SETD1B       | 1,58 |
| zinc finger and BTB domain containing 17                                                                               | ZBTB17       | 1,58 |
| LIM homeobox 1                                                                                                         | LHX1         | 1,58 |
| transmembrane protein 192                                                                                              | TMEM192      | 1,58 |
| Yip1 domain family member 3                                                                                            | YIPF3        | 1,58 |

|                                                                                 |                     |      |
|---------------------------------------------------------------------------------|---------------------|------|
| NME/NM23 nucleoside diphosphate kinase 6                                        | NME6                | 1,58 |
| protein phosphatase 2, regulatory subunit B, gamma                              | PPP2R3C             | 1,58 |
| protein phosphatase 2, regulatory subunit B, epsilon isoform                    | PPP2R5E             | 1,58 |
| zinc finger protein 534                                                         | ZNF534              | 1,58 |
| C-type lectin domain family 7, member A                                         | CLEC7A              | 1,58 |
| chromosome 12 open reading frame 60                                             | C12orf60            | 1,58 |
| mitochondrial ribosomal protein L18                                             | MRPL18              | 1,58 |
| protein phosphatase 5, catalytic subunit                                        | PPP5C               | 1,58 |
| branched chain keto acid dehydrogenase E1, alpha polypeptide                    | BCKDHA              | 1,58 |
| coiled-coil domain containing 61                                                | CCDC61              | 1,58 |
| integrin alpha 6                                                                | ITGA6               | 1,58 |
| inhibitor of kappa light polypeptide gene enhancer in B-cells, kinase beta      | IKBKB               | 1,58 |
| cell division cycle associated 5                                                | CDCA5               | 1,58 |
| ring finger protein 38                                                          | RNF38               | 1,58 |
| dystrophia myotonica-protein kinase                                             | DMPK                | 1,58 |
| lipoma HMGIC fusion partner-like 4                                              | LHFPL4              | 1,58 |
| CD274 molecule                                                                  | CD274               | 1,58 |
| RIMS binding protein 3C; RIMS binding protein 3B                                | RIMBP3C;<br>RIMBP3B | 1,58 |
| Jeck2013 ANTISENSE, coding, INTERNAL, OVEXON, UTR3 best transcript NM_001007098 | SCP2                | 1,58 |
| tyrosyl-tRNA synthetase                                                         | YARS                | 1,57 |
| Transcript Identified by AceView, Entrez Gene ID(s) 22874                       | PLEKHA6             | 1,57 |
| pre-B-cell leukemia homeobox 4                                                  | PBX4                | 1,57 |
| phosphatidylinositol glycan anchor biosynthesis class T                         | PIGT                | 1,57 |
| pancreatic polypeptide                                                          | PPY                 | 1,57 |
| small integral membrane protein 13                                              | SMIM13              | 1,57 |
| zinc finger protein 280B                                                        | ZNF280B             | 1,57 |
| heat shock 70kDa protein 1-like                                                 | HSPA1L              | 1,57 |
| chromosome 6 open reading frame 52                                              | C6orf52             | 1,57 |
| claudin 5                                                                       | CLDN5               | 1,57 |
| stromal interaction molecule 2                                                  | STIM2               | 1,57 |
| UBX domain protein 1                                                            | UBXN1               | 1,57 |
| sialic acid binding Ig-like lectin 9                                            | SIGLEC9             | 1,57 |
| Bloom syndrome, RecQ helicase-like                                              | BLM                 | 1,57 |
| phosphodiesterase 6G, cGMP-specific, rod, gamma                                 | PDE6G               | 1,57 |
| voltage-dependent anion channel 2                                               | VDAC2               | 1,57 |
| yippee like 5                                                                   | YPEL5               | 1,57 |
| Rho GDP dissociation inhibitor (GDI) beta                                       | ARHGDIB             | 1,57 |
| ELOVL fatty acid elongase 4                                                     | ELOVL4              | 1,57 |
| leucine rich repeat containing 4C                                               | LRRC4C              | 1,57 |

|                                                                       |           |      |
|-----------------------------------------------------------------------|-----------|------|
| Ras association (RalGDS/AF-6) domain family (N-terminal) member 8     | RASSF8    | 1,57 |
| F-box and leucine-rich repeat protein 13                              | FBXL13    | 1,57 |
| autophagy related 16-like 1                                           | ATG16L1   | 1,57 |
| exosome component 9                                                   | EXOSC9    | 1,57 |
| chromosome X open reading frame 23                                    | CXorf23   | 1,57 |
| apoptogenic 1, mitochondrial                                          | APOPT1    | 1,57 |
| leucine-rich repeats and calponin homology (CH) domain containing 4   | LRCH4     | 1,57 |
| thioredoxin reductase 2                                               | TXNRD2    | 1,57 |
| MAP7 domain containing 1                                              | MAP7D1    | 1,57 |
| beclin 1, autophagy related                                           | BECN1     | 1,57 |
| cell division cycle 16                                                | CDC16     | 1,57 |
| pre-B-cell leukemia homeobox 3                                        | PBX3      | 1,57 |
| zinc finger protein 827                                               | ZNF827    | 1,57 |
| chromosome 10 open reading frame 113                                  | C10orf113 | 1,57 |
| melanophilin                                                          | MLPH      | 1,57 |
| cell division cycle 14A                                               | CDC14A    | 1,57 |
| shugoshin-like 1 (S. pombe)                                           | SGOL1     | 1,57 |
| lymphocyte antigen 6 complex, locus D                                 | LY6D      | 1,57 |
| RIB43A domain with coiled-coils 2                                     | RIBC2     | 1,57 |
| Ral GTPase activating protein, beta subunit (non-catalytic)           | RALGAPB   | 1,57 |
| protein arginine methyltransferase 3                                  | PRMT3     | 1,57 |
| adenosine deaminase, tRNA-specific 1                                  | ADAT1     | 1,57 |
| zinc finger protein 18                                                | ZNF18     | 1,57 |
| RUN domain containing 3A                                              | RUNDC3A   | 1,57 |
| protein phosphatase, Mg <sup>2+</sup> /Mn <sup>2+</sup> dependent, 1J | PPM1J     | 1,56 |
| kinesin family member 14                                              | KIF14     | 1,56 |
| laminin, beta 4                                                       | LAMB4     | 1,56 |
| epithelial membrane protein 2                                         | EMP2      | 1,56 |
| zinc finger protein 317                                               | ZNF317    | 1,56 |
| CD82 molecule                                                         | CD82      | 1,56 |
| granulin                                                              | GRN       | 1,56 |
| calcium binding protein 39                                            | CAB39     | 1,56 |
| chemokine (C-C motif) ligand 24                                       | CCL24     | 1,56 |
| ALG8, alpha-1,3-glucosyltransferase                                   | ALG8      | 1,56 |
| chromosome 16 open reading frame 89                                   | C16orf89  | 1,56 |
| regulator of G-protein signaling 6                                    | RGS6      | 1,56 |
| rotatin                                                               | RTTN      | 1,56 |
| nudix hydrolase 1                                                     | NUDT1     | 1,56 |
| Transcript Identified by AceView, Entrez Gene ID(s) 6845              | VAMP7     | 1,56 |
| S100 calcium binding protein A7                                       | S100A7    | 1,56 |
| TBC1 domain family, member 8 (with GRAM domain)                       | TBC1D8    | 1,56 |

|                                                                                                             |                                    |      |
|-------------------------------------------------------------------------------------------------------------|------------------------------------|------|
| metastasis associated 1 family member 2                                                                     | MTA2                               | 1,56 |
| oxysterol binding protein-like 3                                                                            | OSBPL3                             | 1,56 |
| abhydrolase domain containing 14B                                                                           | ABHD14B                            | 1,56 |
| zinc finger protein 143                                                                                     | ZNF143                             | 1,56 |
| poly(A) polymerase gamma                                                                                    | PAPOLG                             | 1,56 |
| coiled-coil domain containing 122                                                                           | CCDC122                            | 1,56 |
| polymerase (DNA directed), eta                                                                              | POLH                               | 1,56 |
| mastermind-like domain containing 1                                                                         | MAMLD1                             | 1,56 |
| mitochondrial carrier 1                                                                                     | MTCH1                              | 1,56 |
| cancer/testis antigen family 47, member A1                                                                  | CT47A1                             | 1,56 |
| egl-9 family hypoxia-inducible factor 2                                                                     | EGLN2                              | 1,56 |
| ribonuclease P/MRP 21kDa subunit                                                                            | RPP21                              | 1,56 |
| basic helix-loop-helix family, member e40                                                                   | BHLHE40                            | 1,56 |
| chemokine (C-X-C motif) receptor 2                                                                          | CXCR2                              | 1,56 |
| pleckstrin homology domain containing, family G (with RhoGef domain) member 3                               | PLEKHG3                            | 1,56 |
| heat shock 27kDa protein 2; chromosome 11 open reading frame 52; HSPB2-C11orf52 readthrough (NMD candidate) | HSPB2; C11orf52;<br>HSPB2-C11orf52 | 1,56 |
| IQ motif containing K                                                                                       | IQCK                               | 1,56 |
| inositol-trisphosphate 3-kinase C                                                                           | ITPKC                              | 1,56 |
| short stature homeobox 2                                                                                    | SHOX2                              | 1,56 |
| dickkopf WNT signaling pathway inhibitor 3                                                                  | DKK3                               | 1,55 |
| myosin VI                                                                                                   | MYO6                               | 1,55 |
| lysophosphatidylcholine acyltransferase 4                                                                   | LPCAT4                             | 1,55 |
| transportin 3                                                                                               | TNPO3                              | 1,55 |
| myeloid cell leukemia 1                                                                                     | MCL1                               | 1,55 |
| lactalbumin, alpha-                                                                                         | LALBA                              | 1,55 |
| interleukin 23 receptor                                                                                     | IL23R                              | 1,55 |
| F-box and WD repeat domain containing 7, E3 ubiquitin protein ligase                                        | FBXW7                              | 1,55 |
| Memczak2013 ALT_ACCEPTOR, ALT_DONOR, coding, INTERNAL, intronic best transcript NM_015275                   | KIAA1033                           | 1,55 |
| Salzman2013 ANNOTATED, CDS, coding, OVCODE, OVEXON, UTR3 best transcript NM_000947                          | PRIM2                              | 1,55 |
| cyclin-dependent kinase 17                                                                                  | CDK17                              | 1,55 |
| autophagy related 16-like 1                                                                                 | ATG16L1                            | 1,55 |
| SPRY domain containing 7                                                                                    | SPRYD7                             | 1,55 |
| calcium channel, voltage-dependent, P/Q type, alpha 1A subunit                                              | CACNA1A                            | 1,55 |
| NPL4 homolog, ubiquitin recognition factor                                                                  | NPLOC4                             | 1,55 |
| SPT4 homolog, DSIF elongation factor subunit                                                                | SUPT4H1                            | 1,55 |
| retinol saturase (all-trans-retinol 13,14-reductase)                                                        | RETSAT                             | 1,55 |
| golgi to ER traffic protein 4                                                                               | GET4                               | 1,55 |
| pyridoxamine 5-phosphate oxidase                                                                            | PNPO                               | 1,55 |

|                                                                                               |            |      |
|-----------------------------------------------------------------------------------------------|------------|------|
| myosin binding protein H-like                                                                 | MYBPHL     | 1,55 |
| Src-like-adaptor                                                                              | SLA        | 1,55 |
| MAGE family member B2                                                                         | MAGEB2     | 1,55 |
| X-linked inhibitor of apoptosis, E3 ubiquitin protein ligase                                  | XIAP       | 1,55 |
| chromosome 2 open reading frame 74                                                            | C2orf74    | 1,55 |
| VPS11, CORVET/HOPS core subunit [Source:HGNC Symbol;Acc:HGNC:14583]                           | VPS11      | 1,55 |
| autophagy related 16-like 1                                                                   | ATG16L1    | 1,55 |
| transmembrane protein 87A                                                                     | TMEM87A    | 1,55 |
| spermatogenesis associated, serine-rich 2-like                                                | SPATS2L    | 1,55 |
| Memczak2013 ANTISENSE, CDS, coding, INTERNAL best transcript NM_174956                        | ATP2A3     | 1,55 |
| D-dopachrome tautomerase-like; D-dopachrome tautomerase                                       | DDTL; DDT  | 1,55 |
| potassium channel, voltage gated subfamily A regulatory beta subunit 2                        | KCNAB2     | 1,55 |
| NOC3-like DNA replication regulator                                                           | NOC3L      | 1,55 |
| survival of motor neuron 1, telomeric; survival of motor neuron 2, centromeric                | SMN1; SMN2 | 1,55 |
| exosome component 10                                                                          | EXOSC10    | 1,55 |
| Transcript Identified by AceView, Entrez Gene ID(s) 401067                                    | IQCF3      | 1,54 |
| Homo sapiens ribosomal protein S26, mRNA (cDNA clone MGC:104291 IMAGE:4287636), complete cds. | RPS26      | 1,54 |
| chitinase, di-N-acetyl-                                                                       | CTBS       | 1,54 |
| ubiquitin specific peptidase 17-like family member 10                                         | USP17L10   | 1,54 |
| activated leukocyte cell adhesion molecule                                                    | ALCAM      | 1,54 |
| TSC22 domain family, member 4                                                                 | TSC22D4    | 1,54 |
| MDS1 and EVI1 complex locus                                                                   | MECOM      | 1,54 |
| NADH dehydrogenase (ubiquinone) complex I, assembly factor 7                                  | NDUFAF7    | 1,54 |
| filamin C, gamma                                                                              | FLNC       | 1,54 |
| H2A histone family, member B2                                                                 | H2AFB2     | 1,54 |
| dynein, cytoplasmic 1, intermediate chain 2                                                   | DYNC1I2    | 1,54 |
| zinc finger protein 468                                                                       | ZNF468     | 1,54 |
| microtubule associated protein 4                                                              | MAP4       | 1,54 |
| protein tyrosine phosphatase, non-receptor type 3                                             | PTPN3      | 1,54 |
| apoptosis-inducing factor, mitochondrion-associated, 2                                        | AIFM2      | 1,54 |
| phosphotriesterase related                                                                    | PTER       | 1,54 |
| transmembrane protein 160                                                                     | TMEM160    | 1,54 |
| ancient ubiquitous protein 1                                                                  | AUP1       | 1,54 |
| SLAIN motif family member 2                                                                   | SLAIN2     | 1,54 |
| cadherin 2, type 1, N-cadherin (neuronal)                                                     | CDH2       | 1,54 |
| programmed cell death 10                                                                      | PDCD10     | 1,54 |

|                                                                                           |             |      |
|-------------------------------------------------------------------------------------------|-------------|------|
| GABA(A) receptor-associated protein                                                       | GABARAP     | 1,54 |
| striatin, calmodulin binding protein                                                      | STRN        | 1,54 |
| SFI1 centrin binding protein                                                              | SFI1        | 1,54 |
| TM2 domain containing 1                                                                   | TM2D1       | 1,54 |
| retention in endoplasmic reticulum sorting receptor 1                                     | RER1        | 1,54 |
| inositol polyphosphate-5-phosphatase K                                                    | INPP5K      | 1,54 |
| keratin associated protein 12-2                                                           | KRTAP12-2   | 1,54 |
| ubiquitin-conjugating enzyme E2D 4 (putative)                                             | UBE2D4      | 1,54 |
| carboxypeptidase A6                                                                       | CPA6        | 1,54 |
| methionine adenosyltransferase II, alpha                                                  | MAT2A       | 1,54 |
| vezatin, adherens junctions transmembrane protein                                         | VEZT        | 1,54 |
| hes family bHLH transcription factor 1                                                    | HES1        | 1,54 |
| myeloma overexpressed 2                                                                   | MYEOV2      | 1,54 |
| autophagy related 16-like 1                                                               | ATG16L1     | 1,54 |
| LRRN4 C-terminal like                                                                     | LRRN4CL     | 1,54 |
| mitochondrial elongation factor 2                                                         | MIEF2       | 1,54 |
| D4, zinc and double PHD fingers family 2                                                  | DPF2        | 1,54 |
| syntaxin 2                                                                                | STX2        | 1,54 |
| cardiotrophin 1                                                                           | CTF1        | 1,54 |
| CDV3 homolog (mouse)                                                                      | CDV3        | 1,54 |
| Transcript Identified by AceView, Entrez Gene ID(s) 5747                                  | PTK2        | 1,54 |
| Memczak2013 ALT_ACCEPTOR, ALT_DONOR, coding, INTERNAL, intronic best transcript NM_017841 | SDHAF2      | 1,54 |
| VPS11, CORVET/HOPS core subunit [Source:HGNC Symbol;Acc:HGNC:14583]                       | VPS11       | 1,54 |
| long intergenic non-protein coding RNA 656                                                | LINC00656   | 1,54 |
| VPS11, CORVET/HOPS core subunit [Source:HGNC Symbol;Acc:HGNC:14583]                       | VPS11       | 1,54 |
| ubiquitin-like 7                                                                          | UBL7        | 1,54 |
| autophagy related 16-like 1                                                               | ATG16L1     | 1,53 |
| zinc finger protein 84                                                                    | ZNF84       | 1,53 |
| chromosome 18 open reading frame 25                                                       | C18orf25    | 1,53 |
| zinc finger protein 229                                                                   | ZNF229      | 1,53 |
| ribonuclease H1                                                                           | RNASEH1     | 1,53 |
| C-x(9)-C motif containing 4; mature T-cell proliferation 1                                | CMC4; MTCP1 | 1,53 |
| phosphorylase kinase, alpha 1 (muscle)                                                    | PHKA1       | 1,53 |
| zinc finger, CCHC domain containing 17                                                    | ZCCHC17     | 1,53 |
| coiled-coil alpha-helical rod protein 1                                                   | CCHCR1      | 1,53 |
| interferon gamma receptor 1                                                               | IFNGR1      | 1,53 |
| Memczak2013 ANTISENSE, coding, INTERNAL, intronic best transcript NM_015995               | KLF13       | 1,53 |
| ankyrin repeat domain 50                                                                  | ANKRD50     | 1,53 |
| bromodomain adjacent to zinc finger domain 2B                                             | BAZ2B       | 1,53 |

|                                                                                  |                  |      |
|----------------------------------------------------------------------------------|------------------|------|
| ataxin 1-like                                                                    | ATXN1L           | 1,53 |
| Memczak2013 ANTISENSE, CDS, coding, INTERNAL best transcript NM_002087           | GRN              | 1,53 |
| small cell adhesion glycoprotein                                                 | SMAGP            | 1,53 |
| chromosome 9 open reading frame 78                                               | C9orf78          | 1,53 |
| zinc finger protein 280D                                                         | ZNF280D          | 1,53 |
| BRO1 domain and CAAX motif containing                                            | BROX             | 1,53 |
| caspase 5                                                                        | CASP5            | 1,53 |
| Sp6 transcription factor                                                         | SP6              | 1,53 |
| Fanconi anemia complementation group D2                                          | FANCD2           | 1,53 |
| late cornified envelope 1C                                                       | LCE1C            | 1,53 |
| arylsulfatase D                                                                  | ARSD             | 1,53 |
| ATPase, H+ transporting, lysosomal 14kDa, V1 subunit F                           | ATP6V1F          | 1,53 |
| TBC1 domain family, member 2                                                     | TBC1D2           | 1,53 |
| tripartite motif containing 5                                                    | TRIM5            | 1,53 |
| chromosome 8 open reading frame 22                                               | C8orf22          | 1,53 |
| Sp8 transcription factor                                                         | SP8              | 1,53 |
| chromosome 19 open reading frame 53                                              | C19orf53         | 1,53 |
| transcription termination factor, RNA polymerase I                               | TTF1             | 1,53 |
| chromosome 1 open reading frame 52                                               | C1orf52          | 1,53 |
| caveolin 2                                                                       | CAV2             | 1,53 |
| family with sequence similarity 86, member B2                                    | FAM86B2          | 1,53 |
| UBX domain protein 2B                                                            | UBXN2B           | 1,53 |
| testis expressed 33                                                              | TEX33            | 1,53 |
| CUGBP, Elav-like family member 3                                                 | CELF3            | 1,53 |
| zinc finger protein 765                                                          | ZNF765           | 1,53 |
| R3H domain and coiled-coil containing 1-like                                     | R3HCC1L          | 1,53 |
| basic leucine zipper and W2 domains 1                                            | BZW1             | 1,53 |
| mitogen-activated protein kinase kinase 4; microRNA 744                          | MAP2K4; MIR744   | 1,53 |
| small integral membrane protein 5                                                | SMIM5            | 1,53 |
| phosphoinositide-3-kinase, regulatory subunit 6                                  | PIK3R6           | 1,53 |
| potassium channel modulatory factor 1                                            | KCMF1            | 1,53 |
| dynactin 2 (p50)                                                                 | DCTN2            | 1,53 |
| zinc finger, SWIM-type containing 8                                              | ZSWIM8           | 1,52 |
| transmembrane protein 126B                                                       | TMEM126B         | 1,52 |
| interferon regulatory factor 5                                                   | IRF5             | 1,52 |
| zinc finger protein 221                                                          | ZNF221           | 1,52 |
| proteasome 26S subunit, ATPase 4 [Source:HGNC Symbol;Acc:HGNC:9551]              | PSMC4            | 1,52 |
| sodium channel modifier 1; tumor necrosis factor, alpha-induced protein 8-like 2 | SCNM1; TNFAIP8L2 | 1,52 |
| golgin A8 family, member B                                                       | GOLGA8B          | 1,52 |
| coiled-coil domain containing 173                                                | CCDC173          | 1,52 |
| SMAD family member 7                                                             | SMAD7            | 1,52 |

|                                                                                                                                         |                           |      |
|-----------------------------------------------------------------------------------------------------------------------------------------|---------------------------|------|
| insulin-like growth factor 2 receptor                                                                                                   | IGF2R                     | 1,52 |
| ring finger protein 10                                                                                                                  | RNF10                     | 1,52 |
| NADPH dependent diflavin oxidoreductase 1                                                                                               | NDOR1                     | 1,52 |
| zinc finger protein 100                                                                                                                 | ZNF100                    | 1,52 |
| Spi-1 proto-oncogene                                                                                                                    | SPI1                      | 1,52 |
| eukaryotic translation initiation factor 3, subunit I                                                                                   | EIF3I                     | 1,52 |
| solute carrier family 35 (GDP-fucose transporter), member C2                                                                            | SLC35C2                   | 1,52 |
| membrane protein, palmitoylated 6                                                                                                       | MPP6                      | 1,52 |
| kallikrein related peptidase 15                                                                                                         | KLK15                     | 1,52 |
| family with sequence similarity 205, member C                                                                                           | FAM205C                   | 1,52 |
| leucine rich repeat neuronal 1                                                                                                          | LRRN1                     | 1,52 |
| ATPase, H <sup>+</sup> transporting, lysosomal 31kDa, V1 subunit E2                                                                     | ATP6V1E2                  | 1,52 |
| golgin A6 family-like 3                                                                                                                 | GOLGA6L3                  | 1,52 |
| zinc finger protein 28                                                                                                                  | ZNF28                     | 1,52 |
| exostosin-like glycosyltransferase 3                                                                                                    | EXTL3                     | 1,52 |
| DENN/MADD domain containing 1C                                                                                                          | DENND1C                   | 1,52 |
| peptidylprolyl isomerase (cyclophilin)-like 4                                                                                           | PPIL4                     | 1,52 |
| ring finger and WD repeat domain 3                                                                                                      | RFWD3                     | 1,52 |
| leucine carboxyl methyltransferase 1                                                                                                    | LCMT1                     | 1,52 |
| family with sequence similarity 118, member B                                                                                           | FAM118B                   | 1,52 |
| WW domain binding protein 1-like                                                                                                        | WBP1L                     | 1,52 |
| cut-like homeobox 1                                                                                                                     | CUX1                      | 1,52 |
| eukaryotic translation initiation factor 5B                                                                                             | EIF5B                     | 1,52 |
| chromosome 19 open reading frame 84                                                                                                     | C19orf84                  | 1,52 |
| chromosome 5 open reading frame 38                                                                                                      | C5orf38                   | 1,52 |
| MAP3K7 C-terminal like                                                                                                                  | MAP3K7CL                  | 1,52 |
| FGFR1OP N-terminal like                                                                                                                 | FOPNL                     | 1,52 |
| neutral cholesterol ester hydrolase 1                                                                                                   | NCEH1                     | 1,51 |
| nuclear transport factor 2                                                                                                              | NUTF2                     | 1,51 |
| globoside alpha-1,3-N-acetylgalactosaminyltransferase 1                                                                                 | GBGT1                     | 1,51 |
| spire-type actin nucleation factor 1                                                                                                    | SPIRE1                    | 1,51 |
| cancer susceptibility candidate 3; microRNA 6866                                                                                        | CASC3; MIR6866            | 1,51 |
| harakiri, BCL2 interacting protein                                                                                                      | HRK                       | 1,51 |
| transmembrane protein 106B                                                                                                              | TMEM106B                  | 1,51 |
| midnolin                                                                                                                                | MIDN                      | 1,51 |
| YdjC homolog (bacterial)                                                                                                                | YDJC                      | 1,51 |
| KLRC4-KLRK1 readthrough; killer cell lectin-like receptor subfamily K, member 1; killer cell lectin-like receptor subfamily C, member 4 | KLRC4-KLRK1; KLRK1; KLRC4 | 1,51 |
| sphingosine-1-phosphate phosphatase 1                                                                                                   | SGPP1                     | 1,51 |
| transaldolase 1                                                                                                                         | TALDO1                    | 1,51 |
| lysine (K)-specific demethylase 6B                                                                                                      | KDM6B                     | 1,51 |



|                                                                                                      |                                   |      |
|------------------------------------------------------------------------------------------------------|-----------------------------------|------|
| S100 calcium binding protein A13                                                                     | S100A13                           | 1,51 |
| NIPA-like domain containing 3                                                                        | NIPAL3                            | 1,51 |
| chemokine (C-X-C motif) ligand 1 (melanoma growth stimulating activity, alpha)                       | CXCL1                             | 1,51 |
| ubiquitin associated protein 2; small nucleolar RNA, C/D box 121A; small nucleolar RNA, C/D box 121B | UBAP2;<br>SNORD121A;<br>SNORD121B | 1,51 |
| transmembrane and tetratricopeptide repeat containing 1                                              | TMTC1                             | 1,51 |
| WD repeat domain 73                                                                                  | WDR73                             | 1,51 |
| jade family PHD finger 2                                                                             | JADE2                             | 1,51 |
| Salzman2013 ALT_ACCEPTOR, ALT_DONOR, coding, INTERNAL, intronic best transcript NM_133474            | ZNF721                            | 1,51 |
| RAB, member of RAS oncogene family-like 3                                                            | RABL3                             | 1,51 |
| PRELI domain containing 3B; ATP synthase, H+ transporting, mitochondrial F1 complex, epsilon subunit | PRELID3B; ATP5E                   | 1,51 |
| radial spoke 3 homolog (Chlamydomonas)                                                               | RSPH3                             | 1,51 |
| pleckstrin homology domain containing, family G (with RhoGef domain) member 2                        | PLEKHG2                           | 1,51 |
| chromodomain protein, Y-like 2                                                                       | CDYL2                             | 1,51 |
| BRCA1 associated protein                                                                             | BRAP                              | 1,51 |
| host cell factor C1 regulator 1 (XPO1 dependent)                                                     | HCFC1R1                           | 1,51 |
| zinc finger protein 337                                                                              | ZNF337                            | 1,51 |
| A kinase (PRKA) anchor protein 2                                                                     | AKAP2                             | 1,51 |
| tryptophanyl-tRNA synthetase                                                                         | WARS                              | 1,51 |
| HAUS augmin like complex subunit 6                                                                   | HAUS6                             | 1,51 |
| intersectin 1                                                                                        | ITSN1                             | 1,51 |
| intraflagellar transport 46                                                                          | IFT46                             | 1,51 |
| solute carrier family 25 (mitochondrial iron transporter), member 37                                 | SLC25A37                          | 1,51 |
| family with sequence similarity 160, member A2                                                       | FAM160A2                          | 1,51 |
| HECT and RLD domain containing E3 ubiquitin protein ligase 4                                         | HERC4                             | 1,51 |
| membrane associated ring finger 3                                                                    | MARCH3                            | 1,51 |
| K(lysine) acetyltransferase 7                                                                        | KAT7                              | 1,51 |
| TNF receptor-associated factor 3                                                                     | TRAF3                             | 1,51 |
| galactose-1-phosphate uridylyltransferase                                                            | GALT                              | 1,51 |
| family with sequence similarity 192, member A                                                        | FAM192A                           | 1,50 |
| chromosome 20 open reading frame 194                                                                 | C20orf194                         | 1,50 |
| syndecan binding protein (syntenin) 2                                                                | SDCBP2                            | 1,50 |
| component of oligomeric golgi complex 1                                                              | COG1                              | 1,50 |
| zinc finger protein 556                                                                              | ZNF556                            | 1,50 |
| Janus kinase 1                                                                                       | JAK1                              | 1,50 |
| glucose-fructose oxidoreductase domain containing 2                                                  | GFOD2                             | 1,50 |
| leucine-rich, glioma inactivated 1                                                                   | LGI1                              | 1,50 |

|                                                                                           |                       |      |
|-------------------------------------------------------------------------------------------|-----------------------|------|
| olfactory receptor, family 52, subfamily K, member 2                                      | OR52K2                | 1,50 |
| PIH1 domain containing 2                                                                  | PIH1D2                | 1,50 |
| dolichol kinase                                                                           | DOLK                  | 1,50 |
| MIF4G domain containing                                                                   | MIF4GD                | 1,50 |
| G elongation factor, mitochondrial 1                                                      | GFM1                  | 1,50 |
| BCL2-antagonist/killer 1                                                                  | BAK1                  | 1,50 |
| LIM domain binding 1                                                                      | LDB1                  | 1,50 |
| TSSK6 activating co-chaperone                                                             | TSACC                 | 1,50 |
| transmembrane protein 184B                                                                | TMEM184B              | 1,50 |
| adrenomedullin 2                                                                          | ADM2                  | 1,50 |
| chromosome 6 open reading frame 89                                                        | C6orf89               | 1,50 |
| small glutamine-rich tetratricopeptide repeat (TPR)-containing, alpha                     | SGTA                  | 1,50 |
| chromosome 14 open reading frame 79                                                       | C14orf79              | 1,50 |
| vacuolar protein sorting 41 homolog (S. cerevisiae)                                       | VPS41                 | 1,50 |
| immunoglobulin superfamily, member 9B                                                     | IGSF9B                | 1,50 |
| family with sequence similarity 231, member D; long intergenic non-protein coding RNA 869 | FAM231D;<br>LINC00869 | 1,50 |
| RAB7A, member RAS oncogene family                                                         | RAB7A                 | 1,50 |
| argininosuccinate lyase                                                                   | ASL                   | 1,50 |
| mitogen-activated protein kinase-activated protein kinase 2                               | MAPKAPK2              | 1,50 |
| signal peptide, CUB domain, EGF-like 2                                                    | SCUBE2                | 1,50 |
| G protein-coupled receptor 83                                                             | GPR83                 | 1,50 |
| vesicle transport through interaction with t-SNAREs 1A                                    | VT11A                 | 1,50 |
| VIM antisense RNA 1                                                                       | VIM-AS1               | 1,50 |
| DEAD (Asp-Glu-Ala-Asp) box polypeptide 27                                                 | DDX27                 | 1,50 |
| heat shock protein family B (small), member 11                                            | HSPB11                | 1,50 |
| zinc finger protein 518B                                                                  | ZNF518B               | 1,50 |
| partner of NOB1 homolog                                                                   | PNO1                  | 1,50 |
| long intergenic non-protein coding RNA 1537                                               | LINC01537             | 1,50 |
| Smad nuclear interacting protein 1                                                        | SNIP1                 | 1,50 |
| complement component 1, q subcomponent, B chain                                           | C1QB                  | 1,50 |
| breast carcinoma amplified sequence 2                                                     | BCAS2                 | 1,50 |
| sterile alpha motif domain containing 8                                                   | SAMD8                 | 1,50 |
| fidgetin                                                                                  | FIGN                  | 1,49 |
| RAS-like, estrogen-regulated, growth inhibitor                                            | RERG                  | 1,49 |
| kelch-like family member 2                                                                | KLHL2                 | 1,49 |
| chromosome 5 open reading frame 63                                                        | C5orf63               | 1,49 |
| zinc finger, DHHC-type containing 7                                                       | ZDHHC7                | 1,49 |
| pleckstrin homology domain containing, family N member 1                                  | PLEKHN1               | 1,49 |
| coiled-coil domain containing 74A                                                         | CCDC74A               | 1,49 |
| RAS-like, estrogen-regulated, growth inhibitor                                            | RERG                  | 1,49 |
| major histocompatibility complex, class II, DM alpha                                      | HLA-DMA               | 1,49 |

|                                                                                                                               |                        |      |
|-------------------------------------------------------------------------------------------------------------------------------|------------------------|------|
| RAP1, GTP-GDP dissociation stimulator 1                                                                                       | RAP1GDS1               | 1,49 |
| leucine-rich repeat containing G protein-coupled receptor 6                                                                   | LGR6                   | 1,49 |
| proteasome subunit beta 7                                                                                                     | PSMB7                  | 1,49 |
| acyl-CoA wax alcohol acyltransferase 1                                                                                        | AWAT1                  | 1,49 |
| proteasome 26S subunit, non-ATPase 8                                                                                          | PSMD8                  | 1,49 |
| EYA transcriptional coactivator and phosphatase 3                                                                             | EYA3                   | 1,49 |
| Rab geranylgeranyltransferase, alpha subunit                                                                                  | RABGGTA                | 1,49 |
| zinc finger protein 555                                                                                                       | ZNF555                 | 1,49 |
| zinc finger protein 717                                                                                                       | ZNF717                 | 1,49 |
| centrosomal protein 57kDa-like 1                                                                                              | CEP57L1                | 1,49 |
| small nuclear ribonucleoprotein polypeptide C                                                                                 | SNRPC                  | 1,49 |
| zinc finger, AN1-type domain 3                                                                                                | ZFAND3                 | 1,49 |
| bolA family member 3                                                                                                          | BOLA3                  | 1,49 |
| mitogen-activated protein kinase kinase 1                                                                                     | MAP2K1                 | 1,49 |
| solute carrier family 43 (amino acid system L transporter), member 2                                                          | SLC43A2                | 1,49 |
| interferon induced transmembrane protein 2                                                                                    | IFITM2                 | 1,49 |
| exocyst complex component 5                                                                                                   | EXOC5                  | 1,49 |
| calponin 2                                                                                                                    | CNN2                   | 1,49 |
| ubiquitin-conjugating enzyme E2M                                                                                              | UBE2M                  | 1,49 |
| proteasome 26S subunit, ATPase 4 [Source:HGNC Symbol;Acc:HGNC:9551]                                                           | PSMC4                  | 1,49 |
| eukaryotic translation initiation factor 2-alpha kinase 2                                                                     | EIF2AK2                | 1,49 |
| FSHD region gene 2 family, member B                                                                                           | FRG2B                  | 1,49 |
| lipoma HMGIC fusion partner-like 5                                                                                            | LHFPL5                 | 1,49 |
| RNA binding motif protein 22                                                                                                  | RBM22                  | 1,49 |
| autophagy related 16-like 1                                                                                                   | ATG16L1                | 1,49 |
| hyaluronan and proteoglycan link protein 1                                                                                    | HAPLN1                 | 1,49 |
| secretory leukocyte peptidase inhibitor                                                                                       | SLPI                   | 1,49 |
| glutamate receptor, ionotropic, AMPA 2                                                                                        | GRIA2                  | 1,49 |
| kinesin family member 3B                                                                                                      | KIF3B                  | 1,49 |
| TAF4b RNA polymerase II, TATA box binding protein (TBP)-associated factor, 105kDa                                             | TAF4B                  | 1,49 |
| deoxyribose-phosphate aldolase (putative)                                                                                     | DERA                   | 1,49 |
| threonine synthase-like 1                                                                                                     | THNSL1                 | 1,49 |
| NOTCH-regulated ankyrin repeat protein                                                                                        | NRARP                  | 1,49 |
| family with sequence similarity 49, member B                                                                                  | FAM49B                 | 1,48 |
| Salzman2013 ANTISENSE, coding, INTERNAL, intronic, OVERLAPTX best transcript NM_005603; novel transcript, antisense to ATP8B1 | RP11-35G9.5;<br>ATP8B1 | 1,48 |
| coiled-coil domain containing 144 family, N-terminal like                                                                     | CCDC144NL              | 1,48 |
| transcription elongation factor B polypeptide 3C-like                                                                         | TCEB3CL                | 1,48 |
| transmembrane protein 233                                                                                                     | TMEM233                | 1,48 |

|                                                                                |                       |      |
|--------------------------------------------------------------------------------|-----------------------|------|
| SDA1 domain containing 1                                                       | SDAD1                 | 1,48 |
| small nuclear ribonucleoprotein, U11/U12 35kDa subunit                         | SNRNP35               | 1,48 |
| BEN domain containing 5                                                        | BEND5                 | 1,48 |
| staufen double-stranded RNA binding protein 2                                  | STAU2                 | 1,48 |
| coiled-coil domain containing 51                                               | CCDC51                | 1,48 |
| myelin protein zero-like 3                                                     | MPZL3                 | 1,48 |
| protein phosphatase 2, regulatory subunit A, alpha                             | PPP2R1A               | 1,48 |
| RAB18, member RAS oncogene family                                              | RAB18                 | 1,48 |
| acylphosphatase 1, erythrocyte (common) type                                   | ACYP1                 | 1,48 |
| debranching RNA lariats 1                                                      | DBR1                  | 1,48 |
| zinc finger protein 697                                                        | ZNF697                | 1,48 |
| fibronectin type III domain containing 3A                                      | FNDC3A                | 1,48 |
| RAB30, member RAS oncogene family                                              | RAB30                 | 1,48 |
| polymerase (DNA-directed), delta 3, accessory subunit                          | POLD3                 | 1,48 |
| NECAP endocytosis associated 2                                                 | NECAP2                | 1,48 |
| tumor protein D52                                                              | TPD52                 | 1,48 |
| transmembrane protein 30A                                                      | TMEM30A               | 1,48 |
| vesicle associated membrane protein 7                                          | VAMP7                 | 1,48 |
| queuine tRNA-ribosyltransferase domain containing 1                            | QTRTD1                | 1,48 |
| Transcript Identified by AceView, Entrez Gene ID(s) 26269                      | FBXO8                 | 1,48 |
| Kruppel-like factor 12                                                         | KLF12                 | 1,48 |
| toll-like receptor 3                                                           | TLR3                  | 1,48 |
| meiosis/spermiogenesis associated 1                                            | MEIG1                 | 1,48 |
| novel transcript; Transcript Identified by AceView, Entrez Gene ID(s) 54453    | RP1-122P22.2;<br>RIN2 | 1,48 |
| zinc finger protein 415                                                        | ZNF415                | 1,48 |
| zinc finger protein 529                                                        | ZNF529                | 1,48 |
| Transcript Identified by AceView, Entrez Gene ID(s) 238                        | ALK                   | 1,48 |
| F-box and leucine-rich repeat protein 18                                       | FBXL18                | 1,48 |
| Memczak2013 ANTISENSE, coding, INTERNAL, intronic best transcript NM_001165136 | HERC6                 | 1,48 |
| N-terminal Xaa-Pro-Lys N-methyltransferase 1                                   | NTMT1                 | 1,48 |
| nucleoporin 62kDa; interleukin 4 induced 1                                     | NUP62; IL4I1          | 1,48 |
| sterile alpha motif domain containing 15                                       | SAMD15                | 1,48 |
| keratin 6B, type II                                                            | KRT6B                 | 1,48 |
| cytochrome c oxidase subunit VIc                                               | COX6C                 | 1,48 |
| family with sequence similarity 157, member B                                  | FAM157B               | 1,48 |
| WD repeat domain 1                                                             | WDR1                  | 1,47 |
| centrosomal protein 170kDa                                                     | CEP170                | 1,47 |
| WW domain binding protein 2                                                    | WBP2                  | 1,47 |
| general transcription factor IIE subunit 1                                     | GTF2E1                | 1,47 |
| MAGE family member A2; MAGE family member A2B                                  | MAGEA2;<br>MAGEA2B    | 1,47 |

|                                                                                      |           |      |
|--------------------------------------------------------------------------------------|-----------|------|
| chromosome 17 open reading frame 62                                                  | C17orf62  | 1,47 |
| DENN/MADD domain containing 2A                                                       | DENND2A   | 1,47 |
| centrosomal protein 170B                                                             | CEP170B   | 1,47 |
| potassium channel tetramerization domain containing 10                               | KCTD10    | 1,47 |
| actin binding LIM protein 1                                                          | ABLIM1    | 1,47 |
| motile sperm domain containing 2                                                     | MOSPD2    | 1,47 |
| GATA zinc finger domain containing 2B                                                | GATAD2B   | 1,47 |
| SDE2 telomere maintenance homolog (S. pombe)                                         | SDE2      | 1,47 |
| 2-5-oligoadenylate synthetase 2                                                      | OAS2      | 1,47 |
| N-myristoyltransferase 1                                                             | NMT1      | 1,47 |
| formin binding protein 1                                                             | FNBP1     | 1,47 |
| SET binding factor 2                                                                 | SBF2      | 1,47 |
| WD repeat domain 55                                                                  | WDR55     | 1,47 |
| 5-aminolevulinate synthase 2                                                         | ALAS2     | 1,47 |
| SH3 domain binding glutamate-rich protein                                            | SH3BGR    | 1,47 |
| zinc finger protein 736                                                              | ZNF736    | 1,47 |
| legumain                                                                             | LGMN      | 1,47 |
| regulatory factor X, 2 (influences HLA class II expression)                          | RFX2      | 1,47 |
| GATS protein-like 3                                                                  | GATSL3    | 1,47 |
| sphingomyelin phosphodiesterase 1, acid lysosomal                                    | SMPD1     | 1,47 |
| TAF7 RNA polymerase II, TATA box binding protein (TBP)-associated factor, 55kDa      | TAF7      | 1,47 |
| elongation factor Tu GTP binding domain containing 2                                 | EFTUD2    | 1,47 |
| B double prime 1, subunit of RNA polymerase III transcription initiation factor IIIB | BDP1      | 1,47 |
| Yip1 domain family member 1                                                          | YIPF1     | 1,47 |
| chromosome 17 open reading frame 78                                                  | C17orf78  | 1,47 |
| zinc finger protein 296                                                              | ZNF296    | 1,47 |
| glutathione S-transferase mu 3 (brain)                                               | GSTM3     | 1,47 |
| U2 small nuclear RNA auxiliary factor 1-like 4                                       | U2AF1L4   | 1,47 |
| coiled-coil domain containing 50                                                     | CCDC50    | 1,47 |
| hypoxia inducible factor 3, alpha subunit                                            | HIF3A     | 1,47 |
| POU class 2 homeobox 2                                                               | POU2F2    | 1,47 |
| zinc finger protein 281                                                              | ZNF281    | 1,47 |
| molybdenum cofactor synthesis 3                                                      | MOCS3     | 1,47 |
| TNFAIP3 interacting protein 2                                                        | TNIP2     | 1,47 |
| zinc finger protein 829                                                              | ZNF829    | 1,47 |
| protocadherin 17                                                                     | PCDH17    | 1,47 |
| stimulated by retinoic acid 6                                                        | STRA6     | 1,47 |
| histone cluster 1, H2ac                                                              | HIST1H2AC | 1,47 |
| proteasome 26S subunit, non-ATPase 12                                                | PSMD12    | 1,47 |
| neuropilin 2                                                                         | NRP2      | 1,47 |

|                                                                                                               |                     |      |
|---------------------------------------------------------------------------------------------------------------|---------------------|------|
| fibroblast growth factor 13; long intergenic non-protein coding RNA 889                                       | FGF13;<br>LINC00889 | 1,47 |
| ubiquitin conjugating enzyme E2E 2                                                                            | UBE2E2              | 1,47 |
| polyhomeotic homolog 3 (Drosophila)                                                                           | PHC3                | 1,47 |
| thioredoxin domain containing 9                                                                               | TXNDC9              | 1,47 |
| zinc finger protein 134                                                                                       | ZNF134              | 1,47 |
| CDC like kinase 3                                                                                             | CLK3                | 1,47 |
| synovial sarcoma, X breakpoint 5                                                                              | SSX5                | 1,47 |
| inscuteable homolog (Drosophila)                                                                              | INSC                | 1,46 |
| G protein-coupled receptor 151                                                                                | GPR151              | 1,46 |
| keratin associated protein 4-12                                                                               | KRTAP4-12           | 1,46 |
| WWC family member 3                                                                                           | WWC3                | 1,46 |
| epidermal growth factor receptor pathway substrate 15                                                         | EPS15               | 1,46 |
| arylsulfatase A                                                                                               | ARSA                | 1,46 |
| family with sequence similarity 32, member A                                                                  | FAM32A              | 1,46 |
| dynactin 5 (p25)                                                                                              | DCTN5               | 1,46 |
| GRIP and coiled-coil domain containing 1                                                                      | GCC1                | 1,46 |
| keratin 17, type I                                                                                            | KRT17               | 1,46 |
| STAM binding protein                                                                                          | STAMBP              | 1,46 |
| kinesin family member C3                                                                                      | KIFC3               | 1,46 |
| ATP synthase, H <sup>+</sup> transporting, mitochondrial F1 complex, epsilon subunit pseudogene 2             | ATP5EP2             | 1,46 |
| exonuclease 1                                                                                                 | EXO1                | 1,46 |
| ALG6, alpha-1,3-glucosyltransferase                                                                           | ALG6                | 1,46 |
| cell division cycle 42                                                                                        | CDC42               | 1,46 |
| midkine (neurite growth-promoting factor 2)                                                                   | MDK                 | 1,46 |
| splicing factor 3a, subunit 1, 120kDa                                                                         | SF3A1               | 1,46 |
| zinc finger, CCHC domain containing 7                                                                         | ZCCHC7              | 1,46 |
| interleukin 17 receptor C                                                                                     | IL17RC              | 1,46 |
| lysyl oxidase-like 4                                                                                          | LOXL4               | 1,46 |
| NAD(P)H dehydrogenase, quinone 1                                                                              | NQO1                | 1,46 |
| serine/arginine-rich splicing factor 12                                                                       | SRSF12              | 1,46 |
| chitinase domain containing 1                                                                                 | CHID1               | 1,46 |
| dolichyl-phosphate (UDP-N-acetylglucosamine) N-acetylglucosaminophosphotransferase 1 (GlcNAc-1-P transferase) | DPAGT1              | 1,46 |
| cytochrome b561 family, member A3                                                                             | CYB561A3            | 1,46 |
| snail family zinc finger 2                                                                                    | SNAI2               | 1,46 |
| adipogenesis associated, Mth938 domain containing                                                             | AAMDC               | 1,46 |
| leucine rich repeat containing 6                                                                              | LRRC6               | 1,46 |
| glucosaminyl (N-acetyl) transferase 2, I-branching enzyme (I blood group)                                     | GCNT2               | 1,46 |
| CD300a molecule                                                                                               | CD300A              | 1,46 |
| nucleotide-binding oligomerization domain containing 1                                                        | NOD1                | 1,46 |
| cholinergic receptor, nicotinic alpha 7                                                                       | CHRNA7              | 1,46 |

|                                                                        |                                |      |
|------------------------------------------------------------------------|--------------------------------|------|
| DEAD (Asp-Glu-Ala-Asp) box polypeptide 10                              | DDX10                          | 1,46 |
| transmembrane protein 39B                                              | TMEM39B                        | 1,46 |
| speedy/RINGO cell cycle regulator family member C                      | SPDYC                          | 1,46 |
| coiled-coil domain containing 88A                                      | CCDC88A                        | 1,46 |
| ubiquitin specific peptidase 25                                        | USP25                          | 1,46 |
| vestigial-like family member 4                                         | VGLL4                          | 1,46 |
| LIM domain 7                                                           | LMO7                           | 1,46 |
| cell division cycle 45                                                 | CDC45                          | 1,46 |
| zinc finger protein 90                                                 | ZNF90                          | 1,46 |
| salvador family WW domain containing protein 1                         | SAV1                           | 1,46 |
| polypeptide N-acetylgalactosaminyltransferase 7                        | GALNT7                         | 1,46 |
| nuclear RNA export factor 3                                            | NXF3                           | 1,46 |
| charged multivesicular body protein 1A                                 | CHMP1A                         | 1,46 |
| proteasome inhibitor subunit 1                                         | PSMF1                          | 1,46 |
| proline rich 16                                                        | PRR16                          | 1,46 |
| NSFL1 (p97) cofactor (p47)                                             | NSFL1C                         | 1,46 |
| cilia and flagella associated protein 61                               | CFAP61                         | 1,46 |
| Transcript Identified by AceView, Entrez Gene ID(s)<br>134145          | FAM173B                        | 1,46 |
| transmembrane protein 179B; microRNA 6748                              | TMEM179B;<br>MIR6748           | 1,46 |
| TBC1 domain family, member 10A                                         | TBC1D10A                       | 1,46 |
| surfeit 2                                                              | SURF2                          | 1,46 |
| ring finger protein 44                                                 | RNF44                          | 1,46 |
| INO80 complex subunit C                                                | INO80C                         | 1,46 |
| zinc finger protein 570                                                | ZNF570                         | 1,46 |
| F-box protein 45                                                       | FBXO45                         | 1,46 |
| asparagine synthetase (glutamine-hydrolyzing)                          | ASNS                           | 1,46 |
| ganglioside induced differentiation associated protein 1-<br>like 1    | GDAP1L1                        | 1,46 |
| trafficking protein particle complex 2                                 | TRAPPC2                        | 1,46 |
| keratin 76, type II                                                    | KRT76                          | 1,46 |
| KxDL motif containing 1                                                | KXD1                           | 1,46 |
| RAD23 homolog B, nucleotide excision repair protein                    | RAD23B                         | 1,46 |
| polymerase (RNA) I polypeptide C                                       | POLR1C                         | 1,45 |
| paraneoplastic Ma antigen family-like 2                                | PNMAL2                         | 1,45 |
| VPS11, CORVET/HOPS core subunit [Source:HGNC<br>Symbol;Acc:HGNC:14583] | VPS11                          | 1,45 |
| tropomyosin 2 (beta)                                                   | TPM2                           | 1,45 |
| adenosine A2a receptor                                                 | ADORA2A                        | 1,45 |
| family with sequence similarity 210, member A                          | FAM210A                        | 1,45 |
| vasodilator-stimulated phosphoprotein                                  | VASP                           | 1,45 |
| HMG box domain containing 3                                            | HMGXB3                         | 1,45 |
| uncharacterized LOC100130370; novel transcript                         | LOC100130370;<br>RP11-1055B8.3 | 1,45 |

|                                                                                              |                   |      |
|----------------------------------------------------------------------------------------------|-------------------|------|
| family with sequence similarity 153, member A                                                | FAM153A           | 1,45 |
| ZMYM6 neighbor; zinc finger, MYM-type 6                                                      | ZMYM6NB;<br>ZMYM6 | 1,45 |
| sodium channel, voltage gated, type I beta subunit                                           | SCN1B             | 1,45 |
| ring finger protein 216                                                                      | RNF216            | 1,45 |
| A kinase (PRKA) interacting protein 1                                                        | AKIP1             | 1,45 |
| coiled-coil domain containing 130                                                            | CCDC130           | 1,45 |
| zinc finger protein 569                                                                      | ZNF569            | 1,45 |
| family with sequence similarity 177, member A1                                               | FAM177A1          | 1,45 |
| transmembrane phosphoinositide 3-phosphatase and<br>tensin homolog 2                         | TPTE2             | 1,45 |
| mitochondrial ribosomal protein L52                                                          | MRPL52            | 1,45 |
| fatty acid binding protein 5 (psoriasis-associated)                                          | FABP5             | 1,45 |
| recombination signal binding protein for immunoglobulin<br>kappa J region-like               | RBPJL             | 1,45 |
| dynamin 1                                                                                    | DNM1              | 1,45 |
| dynactin 6                                                                                   | DCTN6             | 1,45 |
| programmed cell death 11                                                                     | PDCD11            | 1,45 |
| GATS protein-like 2                                                                          | GATSL2            | 1,45 |
| ubiquitin specific peptidase 17-like family member 19                                        | USP17L19          | 1,45 |
| nucleolar protein 8                                                                          | NOL8              | 1,45 |
| sparc/osteonectin, cwcw and kazal-like domains<br>proteoglycan (testican) 2                  | SPOCK2            | 1,45 |
| SUN domain containing ossification factor                                                    | SUCO              | 1,45 |
| Memczak2013 ALT_ACCEPTOR, ALT_DONOR, coding,<br>INTERNAL, intronic best transcript NM_021937 | EEFSEC            | 1,45 |
| Rho GTPase activating protein 9                                                              | ARHGAP9           | 1,45 |
| GLIS family zinc finger 3                                                                    | GLIS3             | 1,45 |
| G protein-coupled receptor kinase interacting ArfGAP 2                                       | GIT2              | 1,45 |
| chromosome 9 open reading frame 16                                                           | C9orf16           | 1,45 |
| coiled-coil domain containing 64                                                             | CCDC64            | 1,45 |
| zinc finger protein 490                                                                      | ZNF490            | 1,45 |
| RAB39A, member RAS oncogene family                                                           | RAB39A            | 1,45 |
| chemokine (C-C motif) ligand 23                                                              | CCL23             | 1,45 |
| family with sequence similarity 214, member A                                                | FAM214A           | 1,45 |
| Memczak2013 ALT_ACCEPTOR, ALT_DONOR, coding,<br>INTERNAL, intronic best transcript NM_172373 | ELF1              | 1,45 |
| serine hydrolase-like 2                                                                      | SERHL2            | 1,45 |
| Memczak2013 ANTISENSE, CDS, coding, INTERNAL best<br>transcript NM_001174167                 | SYK               | 1,45 |
| tubulin folding cofactor E                                                                   | TBCE              | 1,45 |
| ADAM metallopeptidase domain 28                                                              | ADAM28            | 1,45 |
| aldehyde dehydrogenase 1 family, member L2                                                   | ALDH1L2           | 1,45 |
| signal-induced proliferation-associated 1                                                    | SIPA1             | 1,45 |
| protein kinase, cGMP-dependent, type I                                                       | PRKG1             | 1,45 |



|                                                                                                                                                             |                                        |      |
|-------------------------------------------------------------------------------------------------------------------------------------------------------------|----------------------------------------|------|
| adhesion G protein-coupled receptor D1                                                                                                                      | ADGRD1                                 | 1,45 |
| glucosamine (N-acetyl)-6-sulfatase                                                                                                                          | GNS                                    | 1,45 |
| solute carrier family 16, member 12                                                                                                                         | SLC16A12                               | 1,45 |
| uncharacterized LOC102723701; novel transcript,<br>antisense to ERLIN2                                                                                      | LOC102723701;<br>RP11-863K10.7         | 1,45 |
| casein kinase 1, alpha 1                                                                                                                                    | CSNK1A1                                | 1,45 |
| KIAA1671                                                                                                                                                    | KIAA1671                               | 1,45 |
| neurochondrin                                                                                                                                               | NCDN                                   | 1,45 |
| xin actin binding repeat containing 2                                                                                                                       | XIRP2                                  | 1,45 |
| cell division cycle 37-like 1                                                                                                                               | CDC37L1                                | 1,45 |
| glucan (1,4-alpha-), branching enzyme 1                                                                                                                     | GBE1                                   | 1,45 |
| olfactory receptor, family 4, subfamily C, member 46                                                                                                        | OR4C46                                 | 1,45 |
| regulator of telomere elongation helicase 1; tumor<br>necrosis factor receptor superfamily, member 6b, decoy;<br>RTEL1-TNFRSF6B readthrough (NMD candidate) | RTEL1;<br>TNFRSF6B; RTEL1-<br>TNFRSF6B | 1,45 |
| ELL associated factor 1                                                                                                                                     | EAF1                                   | 1,45 |
| tubulin polyglutamylase complex subunit 2                                                                                                                   | TPGS2                                  | 1,45 |
| transmembrane protein 79                                                                                                                                    | TMEM79                                 | 1,45 |
| MINOS1-NBL1 readthrough                                                                                                                                     | MINOS1-NBL1                            | 1,45 |
| prosaposin                                                                                                                                                  | PSAP                                   | 1,45 |
| zinc finger, DHHC-type containing 3                                                                                                                         | ZDHHC3                                 | 1,44 |
| elongation factor RNA polymerase II                                                                                                                         | ELL                                    | 1,44 |
| islet cell autoantigen 1 like                                                                                                                               | ICA1L                                  | 1,44 |
| X-prolyl aminopeptidase (aminopeptidase P) 1, soluble                                                                                                       | XPNPEP1                                | 1,44 |
| long intergenic non-protein coding RNA 518                                                                                                                  | LINC00518                              | 1,44 |
| histone deacetylase 9                                                                                                                                       | HDAC9                                  | 1,44 |
| keratin 33B, type I                                                                                                                                         | KRT33B                                 | 1,44 |
| GIPC PDZ domain containing family, member 1                                                                                                                 | GIPC1                                  | 1,44 |
| sperm specific antigen 2                                                                                                                                    | SSFA2                                  | 1,44 |
| tRNA-yW synthesizing protein 3 homolog (S. cerevisiae)                                                                                                      | TYW3                                   | 1,44 |
| family with sequence similarity 21, member C                                                                                                                | FAM21C                                 | 1,44 |
| germ cell associated 2 (haspin)                                                                                                                             | GSG2                                   | 1,44 |
| selectin P ligand                                                                                                                                           | SELPLG                                 | 1,44 |
| kelch-like family member 5                                                                                                                                  | KLHL5                                  | 1,44 |
| myosin IC                                                                                                                                                   | MYO1C                                  | 1,44 |
| kelch repeat and BTB (POZ) domain containing 8                                                                                                              | KBTBD8                                 | 1,44 |
| MLX interacting protein                                                                                                                                     | MLXIP                                  | 1,44 |
| chromosome 11 open reading frame 68                                                                                                                         | C11orf68                               | 1,44 |
| eukaryotic translation initiation factor 5A                                                                                                                 | EIF5A                                  | 1,44 |
| polymerase (RNA) II (DNA directed) polypeptide K, 7.0kDa                                                                                                    | POLR2K                                 | 1,44 |
| nanos homolog 2 (Drosophila)                                                                                                                                | NANOS2                                 | 1,44 |
| cleavage and polyadenylation factor I subunit 1                                                                                                             | CLP1                                   | 1,44 |
| chromosome 8 open reading frame 46                                                                                                                          | C8orf46                                | 1,44 |
| farnesyltransferase, CAAX box, alpha                                                                                                                        | FNTA                                   | 1,44 |

|                                                                                 |                |      |
|---------------------------------------------------------------------------------|----------------|------|
| glucosidase, beta, acid 3 (gene/pseudogene)                                     | GBA3           | 1,44 |
| tec protein tyrosine kinase                                                     | TEC            | 1,44 |
| zinc finger protein 266                                                         | ZNF266         | 1,44 |
| diaphanous-related formin 3                                                     | DIAPH3         | 1,44 |
| CD81 molecule                                                                   | CD81           | 1,44 |
| BCL2-like 12 (proline rich)                                                     | BCL2L12        | 1,44 |
| C15orf38-AP3S2 readthrough                                                      | C15orf38-AP3S2 | 1,44 |
| bone morphogenetic protein/retinoic acid inducible<br>neural-specific 1         | BRINP1         | 1,44 |
| alkB homolog 8, tRNA methyltransferase                                          | ALKBH8         | 1,44 |
| SUZ RNA binding domain containing 1                                             | SZRD1          | 1,44 |
| tropomodulin 3 (ubiquitous)                                                     | TMOD3          | 1,44 |
| olfactory receptor, family 10, subfamily A, member 3                            | OR10A3         | 1,44 |
| MUS81 structure-specific endonuclease subunit                                   | MUS81          | 1,44 |
| additional sex combs like transcriptional regulator 2                           | ASXL2          | 1,44 |
| tyrosine 3-monooxygenase/tryptophan 5-monooxygenase<br>activation protein, beta | YWHAB          | 1,44 |
| chromosome 6 open reading frame 10                                              | C6orf10        | 1,44 |
| integrator complex subunit 1                                                    | INTS1          | 1,44 |
| cysteine-serine-rich nuclear protein 2                                          | CSRNP2         | 1,44 |
| autophagy related 16-like 1                                                     | ATG16L1        | 1,44 |
| zinc finger E-box binding homeobox 1                                            | ZEB1           | 1,44 |
| defensin, beta 116                                                              | DEFB116        | 1,44 |
| like-glycosyltransferase                                                        | LARGE          | 1,44 |
| ZNF582 antisense RNA 1 (head to head)                                           | ZNF582-AS1     | 1,44 |
| olfactory receptor, family 2, subfamily B, member 6                             | OR2B6          | 1,44 |
| UBAP1-MVB12-associated (UMA) domain containing 1                                | UMAD1          | 1,44 |
| placenta specific 1                                                             | PLAC1          | 1,44 |
| C-type lectin domain family 9, member A                                         | CLEC9A         | 1,44 |
| collagen, type XXI, alpha 1                                                     | COL21A1        | 1,44 |
| coiled-coil domain containing 79                                                | CCDC79         | 1,44 |
| mucin 19, oligomeric                                                            | MUC19          | 1,44 |
| DAZ interacting zinc finger protein 1-like                                      | DZIP1L         | 1,44 |
| POTE ankyrin domain family, member B                                            | POTEB          | 1,44 |
| chloride channel CLIC-like 1                                                    | CLCC1          | 1,44 |
| Ran GTPase activating protein 1                                                 | RANGAP1        | 1,44 |
| RAB guanine nucleotide exchange factor (GEF) 1                                  | RABGEF1        | 1,44 |
| cysteine and glycine-rich protein 3 (cardiac LIM protein)                       | CSRP3          | 1,44 |
| nucleoporin 153kDa                                                              | NUP153         | 1,44 |
| snurportin 1                                                                    | SNUPN          | 1,44 |
| mitochondrial ribosomal protein L9                                              | MRPL9          | 1,44 |
| cordon-bleu WH2 repeat protein                                                  | COBL           | 1,44 |
| cation channel, sperm associated 1                                              | CATSPER1       | 1,44 |
| platelet-activating factor acetylhydrolase 1b, regulatory<br>subunit 1 (45kDa)  | PAFAH1B1       | 1,44 |

|                                                                              |                       |      |
|------------------------------------------------------------------------------|-----------------------|------|
| LIM homeobox 6                                                               | LHX6                  | 1,44 |
| PDZ domain containing 9                                                      | PDZD9                 | 1,44 |
| cyclin-dependent kinase inhibitor 2B (p15, inhibits CDK4)                    | CDKN2B                | 1,43 |
| transmembrane protein 154                                                    | TMEM154               | 1,43 |
| centromere protein H                                                         | CENPH                 | 1,43 |
| transmembrane protein 31                                                     | TMEM31                | 1,43 |
| TELO2 interacting protein 1                                                  | TTI1                  | 1,43 |
| zona pellucida glycoprotein 3 (sperm receptor)                               | ZP3                   | 1,43 |
| spindlin family, member 2B                                                   | SPIN2B                | 1,43 |
| interphotoreceptor matrix proteoglycan 1                                     | IMPG1                 | 1,43 |
| suppression of tumorigenicity 7 like                                         | ST7L                  | 1,43 |
| CUE domain containing 1                                                      | CUEDC1                | 1,43 |
| cytochrome P450, family 39, subfamily A, polypeptide 1                       | CYP39A1               | 1,43 |
| Memczak2013 ANTISENSE, CDS, coding, INTERNAL best transcript NM_001130967    | ZNF385A               | 1,43 |
| cerebral endothelial cell adhesion molecule                                  | CERCAM                | 1,43 |
| sarcolemma associated protein                                                | SLMAP                 | 1,43 |
| related RAS viral (r-ras) oncogene homolog 2                                 | RRAS2                 | 1,43 |
| myosin IXB                                                                   | MYO9B                 | 1,43 |
| modulator of apoptosis 1                                                     | MOAP1                 | 1,43 |
| RuvB-like AAA ATPase 2                                                       | RUVBL2                | 1,43 |
| transmembrane protein 54                                                     | TMEM54                | 1,43 |
| nuclear receptor subfamily 2, group F, member 2                              | NR2F2                 | 1,43 |
| tripartite motif containing 34                                               | TRIM34                | 1,43 |
| glucocorticoid modulatory element binding protein 1                          | GMEB1                 | 1,43 |
| meiosis specific with OB domains; long intergenic non-protein coding RNA 254 | MEIOB;<br>LINC00254   | 1,43 |
| ADAM metallopeptidase with thrombospondin type 1 motif 17                    | ADAMTS17              | 1,43 |
| C-type lectin domain family 4, member E                                      | CLEC4E                | 1,43 |
| casein kinase 1, epsilon                                                     | CSNK1E                | 1,43 |
| RAD9 checkpoint clamp component A                                            | RAD9A                 | 1,43 |
| signal transducing adaptor molecule (SH3 domain and ITAM motif) 2            | STAM2                 | 1,43 |
| dual specificity phosphatase 28                                              | DUSP28                | 1,43 |
| gamma-glutamyltransferase 1                                                  | GGT1                  | 1,43 |
| patatin-like phospholipase domain containing 1                               | PNPLA1                | 1,43 |
| long intergenic non-protein coding RNA 1296; double homeobox A pseudogene 10 | LINC01296;<br>DUXAP10 | 1,43 |
| B and T lymphocyte associated                                                | BTLA                  | 1,43 |

|                                                                                                                                                                                                                                                                                                                                                                                                                                                                                                                                                                                                                                                                          |                   |      |
|--------------------------------------------------------------------------------------------------------------------------------------------------------------------------------------------------------------------------------------------------------------------------------------------------------------------------------------------------------------------------------------------------------------------------------------------------------------------------------------------------------------------------------------------------------------------------------------------------------------------------------------------------------------------------|-------------------|------|
| Homo sapiens vesicle-associated membrane protein 7 (VAMP7), transcript variant 2, mRNA.; Homo sapiens vesicle-associated membrane protein 7 (VAMP7), transcript variant 3, mRNA.; Homo sapiens vesicle-associated membrane protein 7 (VAMP7), transcript variant 1, mRNA.; Homo sapiens vesicle-associated membrane protein 7 (VAMP7), transcript variant 4, non-coding RNA.; Homo sapiens vesicle-associated membrane protein 7 (VAMP7), transcript variant 5, non-coding RNA.; vesicle-associated membrane protein 7 [Source:HGNC Symbol;Acc:HGNC:11486]; Homo sapiens vesicle-associated membrane protein 7, mRNA (cDNA clone MGC:64832 IMAGE:6503665), complete cds. | VAMP7             | 1,43 |
| laeverin                                                                                                                                                                                                                                                                                                                                                                                                                                                                                                                                                                                                                                                                 | LVRN              | 1,43 |
| centrosomal protein 72kDa                                                                                                                                                                                                                                                                                                                                                                                                                                                                                                                                                                                                                                                | CEP72             | 1,43 |
| G protein-coupled receptor 132                                                                                                                                                                                                                                                                                                                                                                                                                                                                                                                                                                                                                                           | GPR132            | 1,43 |
| A kinase (PRKA) anchor protein 8                                                                                                                                                                                                                                                                                                                                                                                                                                                                                                                                                                                                                                         | AKAP8             | 1,43 |
| methylenetetrahydrofolate dehydrogenase (NADP+ dependent) 1-like                                                                                                                                                                                                                                                                                                                                                                                                                                                                                                                                                                                                         | MTHFD1L           | 1,43 |
| THAP domain containing 8                                                                                                                                                                                                                                                                                                                                                                                                                                                                                                                                                                                                                                                 | THAP8             | 1,43 |
| ecdysoneless homolog (Drosophila)                                                                                                                                                                                                                                                                                                                                                                                                                                                                                                                                                                                                                                        | ECD               | 1,43 |
| zinc finger, GRF-type containing 1                                                                                                                                                                                                                                                                                                                                                                                                                                                                                                                                                                                                                                       | ZGRF1             | 1,43 |
| family with sequence similarity 73, member A                                                                                                                                                                                                                                                                                                                                                                                                                                                                                                                                                                                                                             | FAM73A            | 1,43 |
| zinc finger and BTB domain containing 8A                                                                                                                                                                                                                                                                                                                                                                                                                                                                                                                                                                                                                                 | ZBTB8A            | 1,43 |
| major facilitator superfamily domain containing 14B                                                                                                                                                                                                                                                                                                                                                                                                                                                                                                                                                                                                                      | MFSD14B           | 1,43 |
| zinc finger protein 354A                                                                                                                                                                                                                                                                                                                                                                                                                                                                                                                                                                                                                                                 | ZNF354A           | 1,43 |
| retinitis pigmentosa GTPase regulator                                                                                                                                                                                                                                                                                                                                                                                                                                                                                                                                                                                                                                    | RPGR              | 1,43 |
| family with sequence similarity 167, member B                                                                                                                                                                                                                                                                                                                                                                                                                                                                                                                                                                                                                            | FAM167B           | 1,43 |
| formin 1                                                                                                                                                                                                                                                                                                                                                                                                                                                                                                                                                                                                                                                                 | FMN1              | 1,43 |
| casein kinase 1, epsilon                                                                                                                                                                                                                                                                                                                                                                                                                                                                                                                                                                                                                                                 | CSNK1E            | 1,43 |
| single-minded family bHLH transcription factor 2                                                                                                                                                                                                                                                                                                                                                                                                                                                                                                                                                                                                                         | SIM2              | 1,43 |
| coiled-coil domain containing 13                                                                                                                                                                                                                                                                                                                                                                                                                                                                                                                                                                                                                                         | CCDC13            | 1,43 |
| zinc finger protein 710                                                                                                                                                                                                                                                                                                                                                                                                                                                                                                                                                                                                                                                  | ZNF710            | 1,43 |
| uveal autoantigen with coiled-coil domains and ankyrin repeats                                                                                                                                                                                                                                                                                                                                                                                                                                                                                                                                                                                                           | UACA              | 1,43 |
| late cornified envelope 1E                                                                                                                                                                                                                                                                                                                                                                                                                                                                                                                                                                                                                                               | LCE1E             | 1,43 |
| malignant fibrous histiocytoma amplified sequence 1                                                                                                                                                                                                                                                                                                                                                                                                                                                                                                                                                                                                                      | MFHAS1            | 1,43 |
| actinin, alpha 1; high mobility group nucleosome binding domain 1 pseudogene 3                                                                                                                                                                                                                                                                                                                                                                                                                                                                                                                                                                                           | ACTN1;<br>HMGN1P3 | 1,43 |
| DMRT-like family A1                                                                                                                                                                                                                                                                                                                                                                                                                                                                                                                                                                                                                                                      | DMRTA1            | 1,43 |
| sodium channel, voltage gated, type IV alpha subunit                                                                                                                                                                                                                                                                                                                                                                                                                                                                                                                                                                                                                     | SCN4A             | 1,42 |
| cytoplasmic polyadenylation element binding protein 1                                                                                                                                                                                                                                                                                                                                                                                                                                                                                                                                                                                                                    | CPEB1             | 1,42 |
| fibulin 5                                                                                                                                                                                                                                                                                                                                                                                                                                                                                                                                                                                                                                                                | FBLN5             | 1,42 |
| HNRNPUL2-BSCL2 readthrough (NMD candidate)                                                                                                                                                                                                                                                                                                                                                                                                                                                                                                                                                                                                                               | HNRNPUL2-BSCL2    | 1,42 |

|                                                                                |                     |      |
|--------------------------------------------------------------------------------|---------------------|------|
| Memczak2013 ANTISENSE, coding, INTERNAL, intronic<br>best transcript NM_139057 | ADAMTS17            | 1,42 |
| muscleblind-like splicing regulator 2                                          | MBNL2               | 1,42 |
| chromosome 15 open reading frame 52                                            | C15orf52            | 1,42 |
| U6 snRNA biogenesis 1                                                          | USB1                | 1,42 |
| rippy transcriptional repressor 3                                              | RIPPLY3             | 1,42 |
| G protein-coupled receptor 137                                                 | GPR137              | 1,42 |
| FES proto-oncogene, tyrosine kinase                                            | FES                 | 1,42 |
| translin                                                                       | TSN                 | 1,42 |
| HERV-H LTR-associating 3                                                       | HHLA3               | 1,42 |
| ubiquitin C                                                                    | UBC                 | 1,42 |
| protein kinase, membrane associated tyrosine/threonine<br>1                    | PKMYT1              | 1,42 |
| peptidylprolyl isomerase D                                                     | PPID                | 1,42 |
| leucine rich repeat and sterile alpha motif containing 1                       | LRSAM1              | 1,42 |
| chaperonin containing TCP1, subunit 6A (zeta 1)                                | CCT6A               | 1,42 |
| hemoglobin, alpha 1                                                            | HBA1                | 1,42 |
| chemokine (C motif) receptor 1                                                 | XCR1                | 1,42 |
| casein kinase 1, gamma 3                                                       | CSNK1G3             | 1,42 |
| POP1 homolog, ribonuclease P/MRP subunit                                       | POP1                | 1,42 |
| NFKB inhibitor interacting Ras-like 1                                          | NKIRAS1             | 1,42 |
| hemoglobin, alpha 2                                                            | HBA2                | 1,42 |
| hes family bHLH transcription factor 5                                         | HES5                | 1,42 |
| dystrophia myotonica, WD repeat containing                                     | DMWD                | 1,42 |
| SID1 transmembrane family, member 1                                            | SIDT1               | 1,42 |
| testis expressed 38                                                            | TEX38               | 1,42 |
| integrin beta 3                                                                | ITGB3               | 1,42 |
| collagen, type IV, alpha 3 (Goodpasture antigen) binding<br>protein            | COL4A3BP            | 1,42 |
| cerebellin 3 precursor                                                         | CBLN3               | 1,42 |
| paired-like homeodomain 3                                                      | PITX3               | 1,42 |
| synaptic Ras GTPase activating protein 1; microRNA 5004                        | SYNGAP1;<br>MIR5004 | 1,42 |
| tuberous sclerosis 2                                                           | TSC2                | 1,42 |
| carboxylesterase 4A                                                            | CES4A               | 1,42 |
| deoxynucleotidyltransferase, terminal, interacting protein<br>2                | DNTTIP2             | 1,42 |
| zinc finger protein 583                                                        | ZNF583              | 1,42 |
| zinc finger protein 761; tropomyosin 3 pseudogene 9                            | ZNF761; TPM3P9      | 1,42 |
| zinc finger protein 738                                                        | ZNF738              | 1,42 |
| fragile histidine triad                                                        | FHIT                | 1,42 |
| caspase recruitment domain family, member 8                                    | CARD8               | 1,42 |
| immunoglobulin lambda-like polypeptide 1                                       | IGLL1               | 1,42 |
| acyl-CoA dehydrogenase family, member 11                                       | ACAD11              | 1,42 |
| general transcription factor IIH subunit 3                                     | GTF2H3              | 1,42 |

|                                                                                                                                          |                                 |      |
|------------------------------------------------------------------------------------------------------------------------------------------|---------------------------------|------|
| long intergenic non-protein coding RNA 483                                                                                               | LINC00483                       | 1,42 |
| ubiquilin 1                                                                                                                              | UBQLN1                          | 1,42 |
| WD repeat domain 7                                                                                                                       | WDR7                            | 1,42 |
| lines homolog 1                                                                                                                          | LINS1                           | 1,42 |
| BUD31 homolog                                                                                                                            | BUD31                           | 1,42 |
| calmodulin binding transcription activator 2                                                                                             | CAMTA2                          | 1,42 |
| spermatogenesis associated 13; C1q and tumor necrosis factor related protein 9                                                           | SPATA13;<br>C1QTNF9             | 1,42 |
| heat shock 70kDa protein 8; small nucleolar RNA, C/D box 14C; small nucleolar RNA, C/D box 14D                                           | HSPA8;<br>SNORD14C;<br>SNORD14D | 1,41 |
| ariadne RBR E3 ubiquitin protein ligase 1; microRNA 630                                                                                  | ARIH1; MIR630                   | 1,41 |
| LDL receptor related protein 2                                                                                                           | LRP2                            | 1,41 |
| NFKB inhibitor interacting Ras-like 2                                                                                                    | NKIRAS2                         | 1,41 |
| activating transcription factor 5; microRNA 4751                                                                                         | ATF5; MIR4751                   | 1,41 |
| solute carrier family 25, member 34                                                                                                      | SLC25A34                        | 1,41 |
| nucleoporin 214kDa                                                                                                                       | NUP214                          | 1,41 |
| cancer/testis antigen family 47, member A7;<br>cancer/testis antigen family 47, member A5;<br>cancer/testis antigen family 47, member A6 | CT47A7; CT47A5;<br>CT47A6       | 1,41 |
| sarcospan                                                                                                                                | SSPN                            | 1,41 |
| neuronal cell adhesion molecule                                                                                                          | NRCAM                           | 1,41 |
| ataxin 7                                                                                                                                 | ATXN7                           | 1,41 |
| IK cytokine, down-regulator of HLA II; microRNA 3655                                                                                     | IK; MIR3655                     | 1,41 |
| SPT7-like STAGA complex gamma subunit                                                                                                    | SUPT7L                          | 1,41 |
| ferredoxin reductase                                                                                                                     | FDXR                            | 1,41 |
| mesoderm induction early response 1, transcriptional regulator                                                                           | MIER1                           | 1,41 |
| thymosin beta 4, Y-linked                                                                                                                | TMSB4Y                          | 1,41 |
| Transcript Identified by AceView, Entrez Gene ID(s) 4134                                                                                 | MAP4                            | 1,41 |
| ring finger protein 19B                                                                                                                  | RNF19B                          | 1,41 |
| SH3KBP1 binding protein 1                                                                                                                | SHKBP1                          | 1,41 |
| dynein, cytoplasmic 1, light intermediate chain 2                                                                                        | DYNC1LI2                        | 1,41 |
| inhibitor of CDK, cyclin A1 interacting protein 1                                                                                        | INCA1                           | 1,41 |
| keratin associated protein 21-1                                                                                                          | KRTAP21-1                       | 1,41 |
| serine/threonine kinase 40                                                                                                               | STK40                           | 1,41 |
| ATP binding cassette subfamily F member 2                                                                                                | ABCF2                           | 1,41 |
| ring finger protein 31                                                                                                                   | RNF31                           | 1,41 |
| chromosome 10 open reading frame 90                                                                                                      | C10orf90                        | 1,41 |
| zona pellucida binding protein                                                                                                           | ZPBP                            | 1,41 |
| MAP kinase interacting serine/threonine kinase 2                                                                                         | MKNK2                           | 1,41 |
| retinitis pigmentosa 2 (X-linked recessive)                                                                                              | RP2                             | 1,41 |

|                                                                                             |                        |      |
|---------------------------------------------------------------------------------------------|------------------------|------|
| potassium channel, voltage gated subfamily A regulatory beta subunit 1                      | KCNAB1                 | 1,41 |
| translocator protein 2                                                                      | TSPO2                  | 1,41 |
| protein tyrosine phosphatase, non-receptor type 11                                          | PTPN11                 | 1,41 |
| ADP-ribosylation factor like GTPase 4C                                                      | ARL4C                  | 1,41 |
| olfactory receptor, family 52, subfamily E, member 1 (gene/pseudogene)                      | OR52E1                 | 1,41 |
| RAB2B, member RAS oncogene family                                                           | RAB2B                  | 1,41 |
| spermine synthase                                                                           | SMS                    | 1,41 |
| TAF2 RNA polymerase II, TATA box binding protein (TBP)-associated factor, 150kDa            | TAF2                   | 1,41 |
| sprouty-related, EVH1 domain containing 2                                                   | SPRED2                 | 1,41 |
| Memczak2013 ANTISENSE, CDS, coding, INTERNAL best transcript NM_014423                      | AFF4                   | 1,41 |
| CD3g molecule, gamma (CD3-TCR complex)                                                      | CD3G                   | 1,41 |
| Transcript Identified by AceView, Entrez Gene ID(s) 23670                                   | TMEM2                  | 1,41 |
| damage-specific DNA binding protein 2                                                       | DDB2                   | 1,41 |
| family with sequence similarity 200, member B                                               | FAM200B                | 1,41 |
| cAMP responsive element modulator                                                           | CREM                   | 1,41 |
| chemokine (C-C motif) receptor 1                                                            | CCR1                   | 1,41 |
| tubulin tyrosine ligase-like family member 12                                               | TTLL12                 | 1,41 |
| proliferation-associated 2G4                                                                | PA2G4                  | 1,41 |
| pogo transposable element with KRAB domain                                                  | POGK                   | 1,41 |
| tubulin tyrosine ligase-like family member 6                                                | TTLL6                  | 1,41 |
| zinc finger, DHHC-type containing 18                                                        | ZDHHC18                | 1,41 |
| WAP four-disulfide core domain 10B                                                          | WFDC10B                | 1,41 |
| delta-like 4 (Drosophila)                                                                   | DLL4                   | 1,41 |
| IQ motif containing D                                                                       | IQCD                   | 1,41 |
| PC-esterase domain containing 1A                                                            | PCED1A                 | 1,41 |
| H2A histone family, member B1; H2A histone family, member B2; H2A histone family, member B3 | H2AFB1; H2AFB2; H2AFB3 | 1,41 |
| tetratricopeptide repeat domain 14                                                          | TTC14                  | 1,41 |
| poly(rC) binding protein 3                                                                  | PCBP3                  | 1,41 |
| coatamer protein complex subunit gamma 2; testis specific 13                                | COPG2; TSGA13          | 1,41 |
| olfactory receptor, family 5, subfamily M, member 1                                         | OR5M1                  | 1,41 |
| DEAD (Asp-Glu-Ala-Asp) box polypeptide 20                                                   | DDX20                  | 1,41 |
| Zic family member 2                                                                         | ZIC2                   | 1,41 |
| histone acetyltransferase 1                                                                 | HAT1                   | 1,41 |
| inositol 1,4,5-trisphosphate receptor interacting protein-like 1                            | ITPRIPL1               | 1,41 |
| bystin-like                                                                                 | BYSL                   | 1,41 |
| RALBP1 associated Eps domain containing 1                                                   | REPS1                  | 1,41 |
| transmembrane and coiled-coil domain family 2                                               | TMCC2                  | 1,41 |

|                                                                                                                                              |                                  |      |
|----------------------------------------------------------------------------------------------------------------------------------------------|----------------------------------|------|
| ubiquitin specific peptidase 32 pseudogene 2; family with sequence similarity 106, member A; coiled-coil domain containing 144B (pseudogene) | USP32P2;<br>FAM106A;<br>CCDC144B | 1,41 |
| golgin A8 family, member A; golgin A8 family, member B                                                                                       | GOLGA8A;<br>GOLGA8B              | 1,40 |
| THUMP domain containing 1                                                                                                                    | THUMPD1                          | 1,40 |
| ring finger and FYVE-like domain containing E3 ubiquitin protein ligase                                                                      | RFFL                             | 1,40 |
| arrestin, beta 2                                                                                                                             | ARRB2                            | 1,40 |
| COMM domain containing 6                                                                                                                     | COMMD6                           | 1,40 |
| Memczak2013 ANTISENSE, coding, INTERNAL, intronic best transcript NM_006990                                                                  | WASF2                            | 1,40 |
| transcription factor 20 (AR1)                                                                                                                | TCF20                            | 1,40 |
| transcription factor 20 (AR1)                                                                                                                | TCF20                            | 1,40 |
| ATPase, H <sup>+</sup> transporting, lysosomal 13kDa, V1 subunit G2                                                                          | ATP6V1G2                         | 1,40 |
| COMM domain containing 4                                                                                                                     | COMMD4                           | 1,40 |
| sorting nexin 29 pseudogene 2; sorting nexin 29 pseudogene 1                                                                                 | SNX29P2;<br>SNX29P1              | 1,40 |
| zinc finger protein 585B                                                                                                                     | ZNF585B                          | 1,40 |
| dehydrogenase/reductase (SDR family) member 1                                                                                                | DHRS1                            | 1,40 |
| breast carcinoma amplified sequence 1                                                                                                        | BCAS1                            | 1,40 |
| cylindromatosis (turban tumor syndrome)                                                                                                      | CYLD                             | 1,40 |
| synaptojanin 1                                                                                                                               | SYNJ1                            | 1,40 |
| lysosomal trafficking regulator                                                                                                              | LYST                             | 1,40 |
| chromosome 3 open reading frame 49                                                                                                           | C3orf49                          | 1,40 |
| DDB1 and CUL4 associated factor 13                                                                                                           | DCAF13                           | 1,40 |
| baculoviral IAP repeat containing 3                                                                                                          | BIRC3                            | 1,40 |
| RAB3C, member RAS oncogene family                                                                                                            | RAB3C                            | 1,40 |
| chromosome 8 open reading frame 88                                                                                                           | C8orf88                          | 1,40 |
| chemokine (C-X-C motif) receptor 3                                                                                                           | CXCR3                            | 1,40 |
| indoleamine 2,3-dioxygenase 1                                                                                                                | IDO1                             | 1,40 |
| bridging integrator 1                                                                                                                        | BIN1                             | 1,40 |
| retinoic acid receptor, beta                                                                                                                 | RARB                             | 1,40 |
| zinc finger protein 737                                                                                                                      | ZNF737                           | 1,40 |
| RNA binding motif protein 48                                                                                                                 | RBM48                            | 1,40 |
| 2-hydroxyacyl-CoA lyase 1                                                                                                                    | HACL1                            | 1,40 |
| SLP adaptor and CSK interacting membrane protein                                                                                             | SCIMP                            | 1,40 |
| ring finger protein 25                                                                                                                       | RNF25                            | 1,40 |
| Xg blood group; Xg pseudogene, Y-linked 2                                                                                                    | XG; XGY2                         | 1,40 |
| RAB1B, member RAS oncogene family                                                                                                            | RAB1B                            | 1,40 |
| trafficking protein particle complex 8                                                                                                       | TRAPPC8                          | 1,40 |
| phosphate cytidylyltransferase 1, choline, alpha                                                                                             | PCYT1A                           | 1,40 |
| casein kinase 1, epsilon                                                                                                                     | CSNK1E                           | 1,40 |
| coiled-coil domain containing 84                                                                                                             | CCDC84                           | 1,40 |



|                                                                                                     |                 |      |
|-----------------------------------------------------------------------------------------------------|-----------------|------|
| chromosome 11 open reading frame 98; LBH domain containing 1                                        | C11orf98; LBHD1 | 1,40 |
| non-SMC condensin I complex subunit H                                                               | NCAPH           | 1,40 |
| sphingomyelin phosphodiesterase, acid-like 3B                                                       | SMPDL3B         | 1,40 |
| CD2 (cytoplasmic tail) binding protein 2                                                            | CD2BP2          | 1,40 |
| proline rich 9                                                                                      | PRR9            | 1,40 |
| neuralized E3 ubiquitin protein ligase 3                                                            | NEURL3          | 1,40 |
| reticulon 4                                                                                         | RTN4            | 1,40 |
| bromodomain, testis-specific                                                                        | BRDT            | 1,40 |
| G protein-coupled receptor 33 (gene/pseudogene)                                                     | GPR33           | 1,40 |
| Memczak2013 ANTISENSE, CDS, coding, INTERNAL, UTR3 best transcript NM_004308                        | ARHGAP1         | 1,40 |
| SPARC related modular calcium binding 2                                                             | SMOC2           | 1,40 |
| mitogen-activated protein kinase kinase kinase 2                                                    | MAP4K2          | 1,40 |
| zinc finger protein 471                                                                             | ZNF471          | 1,40 |
| Transcript Identified by AceView, Entrez Gene ID(s) 22843                                           | PPM1E           | 1,40 |
| microphthalmia-associated transcription factor                                                      | MITF            | 1,40 |
| ADAM metallopeptidase with thrombospondin type 1 motif 18                                           | ADAMTS18        | 1,40 |
| synaptogyrin 2                                                                                      | SYNGR2          | 1,40 |
| abl-interactor 1                                                                                    | ABI1            | 1,40 |
| nucleolar protein 10                                                                                | NOL10           | 1,40 |
| MAGE family member E2                                                                               | MAGEE2          | 1,40 |
| serpin peptidase inhibitor, clade H (heat shock protein 47), member 1, (collagen binding protein 1) | SERPINH1        | 1,40 |
| sperm associated antigen 11B                                                                        | SPAG11B         | 1,40 |
| Zhang2013 ALT_ACCEPTOR, ALT_DONOR, coding, INTERNAL, intronic best transcript NM_000976             | RPL12           | 1,40 |
| zinc finger protein 235                                                                             | ZNF235          | 1,40 |
| sortilin-related VPS10 domain containing receptor 2                                                 | SORCS2          | 1,40 |
| KIAA1522                                                                                            | KIAA1522        | 1,40 |
| Rho GTPase activating protein 30                                                                    | ARHGAP30        | 1,40 |
| ficolin (collagen/fibrinogen domain containing lectin) 2                                            | FCN2            | 1,40 |
| vesicle associated membrane protein 1                                                               | VAMP1           | 1,40 |
| zinc finger, MYND-type containing 12                                                                | ZMYND12         | 1,39 |
| anoctamin 4                                                                                         | ANO4            | 1,39 |
| cell division cycle 37; microRNA 1181                                                               | CDC37; MIR1181  | 1,39 |
| origin recognition complex subunit 3                                                                | ORC3            | 1,39 |
| ankyrin repeat domain 33                                                                            | ANKRD33         | 1,39 |
| Transcript Identified by AceView, Entrez Gene ID(s) 5426                                            | POLE            | 1,39 |
| dual specificity phosphatase 3                                                                      | DUSP3           | 1,39 |

|                                                                                                                                           |                            |      |
|-------------------------------------------------------------------------------------------------------------------------------------------|----------------------------|------|
| cancer/testis antigen family 47, member A9;<br>cancer/testis antigen family 47, member A4;<br>cancer/testis antigen family 47, member A11 | CT47A9; CT47A4;<br>CT47A11 | 1,39 |
| cancer/testis antigen family 47, member A3;<br>cancer/testis antigen family 47, member A10                                                | CT47A3; CT47A10            | 1,39 |
| cancer/testis antigen family 47, member A10;<br>cancer/testis antigen family 47, member A8;<br>cancer/testis antigen family 47, member A9 | CT47A10; CT47A8;<br>CT47A9 | 1,39 |
| cancer/testis antigen family 47, member A6;<br>cancer/testis antigen family 47, member A4                                                 | CT47A6; CT47A4             | 1,39 |
| cancer/testis antigen family 47, member A3                                                                                                | CT47A3                     | 1,39 |
| cancer/testis antigen family 47, member A2                                                                                                | CT47A2                     | 1,39 |
| cancer/testis antigen family 47, member A12;<br>cancer/testis antigen family 47, member A8                                                | CT47A12; CT47A8            | 1,39 |
| hydroxysteroid dehydrogenase like 1                                                                                                       | HSDL1                      | 1,39 |
| Transcript Identified by AceView, Entrez Gene ID(s) 27019                                                                                 | DNAI1                      | 1,39 |
| synaptogyrin 3                                                                                                                            | SYNGR3                     | 1,39 |
| Transcript Identified by AceView, Entrez Gene ID(s) 8792                                                                                  | TNFRSF11A                  | 1,39 |
| vascular endothelial zinc finger 1                                                                                                        | VEZF1                      | 1,39 |
| Jeck2013 ALT_ACCEPTOR, ALT_DONOR, coding,<br>INTERNAL, intronic best transcript NM_012316                                                 | KPNA6                      | 1,39 |
| LSM10, U7 small nuclear RNA associated                                                                                                    | LSM10                      | 1,39 |
| zinc finger protein 622                                                                                                                   | ZNF622                     | 1,39 |
| Transcript Identified by AceView, Entrez Gene ID(s) 8939                                                                                  | FUBP3                      | 1,39 |
| ubiquitin specific peptidase 17-like family member 12                                                                                     | USP17L12                   | 1,39 |
| glial cell derived neurotrophic factor                                                                                                    | GDNF                       | 1,39 |
| ATP binding cassette subfamily G member 2 (Junior blood<br>group)                                                                         | ABCG2                      | 1,39 |
| claudin domain containing 1                                                                                                               | CLDND1                     | 1,39 |
| excision repair cross-complementation group 6-like                                                                                        | ERCC6L                     | 1,39 |
| zinc finger protein 526                                                                                                                   | ZNF526                     | 1,39 |
| aarF domain containing kinase 1                                                                                                           | ADCK1                      | 1,39 |
| guanylate kinase 1                                                                                                                        | GUK1                       | 1,39 |
| tetratricopeptide repeat domain 37                                                                                                        | TTC37                      | 1,39 |
| tubulin tyrosine ligase                                                                                                                   | TTL                        | 1,39 |
| ubiquitin C-terminal hydrolase L5                                                                                                         | UCHL5                      | 1,39 |
| Memczak2013 ANTISENSE, CDS, coding, INTERNAL,<br>intronic best transcript NM_001178056                                                    | PARP8                      | 1,39 |
| COX17 cytochrome c oxidase copper chaperone                                                                                               | COX17                      | 1,39 |
| Rho GTPase activating protein 1                                                                                                           | ARHGAP1                    | 1,39 |
| death effector domain containing 2                                                                                                        | DEDD2                      | 1,39 |
| insulin like growth factor binding protein 2                                                                                              | IGFBP2                     | 1,39 |

|                                                                                |                            |      |
|--------------------------------------------------------------------------------|----------------------------|------|
| MIS12 kinetochore complex component                                            | MIS12                      | 1,39 |
| glutamate rich 5                                                               | ERICH5                     | 1,39 |
| zinc finger and SCAN domain containing 10                                      | ZSCAN10                    | 1,39 |
| gastric inhibitory polypeptide receptor                                        | GIPR                       | 1,39 |
| synovial sarcoma, X breakpoint 4B                                              | SSX4B                      | 1,39 |
| neuroplastin                                                                   | NPTN                       | 1,39 |
| ectodysplasin A                                                                | EDA                        | 1,39 |
| antizyme inhibitor 1                                                           | AZIN1                      | 1,39 |
| Kin17 DNA and RNA binding protein                                              | KIN                        | 1,39 |
| family with sequence similarity 76, member B                                   | FAM76B                     | 1,39 |
| small nuclear ribonucleoprotein polypeptide E                                  | SNRPE                      | 1,39 |
| Niemann-Pick disease, type C1                                                  | NPC1                       | 1,39 |
| NIMA-related kinase 5                                                          | NEK5                       | 1,39 |
| pantothenate kinase 4                                                          | PANK4                      | 1,39 |
| Memczak2013 ANTISENSE, coding, INTERNAL, intronic<br>best transcript NM_181985 | LILRA5                     | 1,39 |
| protein phosphatase 1, regulatory subunit 13B                                  | PPP1R13B                   | 1,39 |
| chromosome 4 open reading frame 22                                             | C4orf22                    | 1,39 |
| chromosome 2 open reading frame 42                                             | C2orf42                    | 1,39 |
| DEAD/H (Asp-Glu-Ala-Asp/His) box helicase 11                                   | DDX11                      | 1,38 |
| opioid binding protein/cell adhesion molecule-like                             | OPCML                      | 1,38 |
| golgin A6 family, member C                                                     | GOLGA6C                    | 1,38 |
| thioredoxin 2                                                                  | TXN2                       | 1,38 |
| ESF1 nucleolar pre-rRNA processing protein homolog                             | ESF1                       | 1,38 |
| KIAA1614                                                                       | KIAA1614                   | 1,38 |
| adenosine A3 receptor; transmembrane and<br>immunoglobulin domain containing 3 | ADORA3; TMIGD3             | 1,38 |
| transcription factor 20 (AR1)                                                  | TCF20                      | 1,38 |
| transcription factor 20 (AR1)                                                  | TCF20                      | 1,38 |
| surfeit 2 [Source:HGNC Symbol;Acc:HGNC:11475]                                  | SURF2                      | 1,38 |
| calmodulin 3 (phosphorylase kinase, delta)                                     | CALM3                      | 1,38 |
| cyclic nucleotide gated channel beta 3                                         | CNGB3                      | 1,38 |
| PROP paired-like homeobox 1                                                    | PROP1                      | 1,38 |
| lectin, galactoside-binding, soluble, 9B                                       | LGALS9B                    | 1,38 |
| DPH2 homolog                                                                   | DPH2                       | 1,38 |
| zinc finger and BTB domain containing 10                                       | ZBTB10                     | 1,38 |
| HtrA serine peptidase 3                                                        | HTRA3                      | 1,38 |
| vesicle associated membrane protein 8                                          | VAMP8                      | 1,38 |
| ATP binding cassette subfamily C member 11                                     | ABCC11                     | 1,38 |
| ubiquitin associated protein 1                                                 | UBAP1                      | 1,38 |
| kallikrein related peptidase 2                                                 | KLK2                       | 1,38 |
| DGCR8 microprocessor complex subunit; microRNA 1306;<br>microRNA 3618          | DGCR8; MIR1306;<br>MIR3618 | 1,38 |
| small proline-rich protein 2D                                                  | SPRR2D                     | 1,38 |
| coiled-coil domain containing 9                                                | CCDC9                      | 1,38 |

|                                                                       |                 |      |
|-----------------------------------------------------------------------|-----------------|------|
| centrosomal protein 120kDa                                            | CEP120          | 1,38 |
| NADH dehydrogenase (ubiquinone) 1 alpha subcomplex, 10, 42kDa         | NDUFA10         | 1,38 |
| tubulin, alpha 1c                                                     | TUBA1C          | 1,38 |
| pre-mRNA processing factor 3                                          | PRPF3           | 1,38 |
| hes-related family bHLH transcription factor with YRPW motif 2        | HEY2            | 1,38 |
| E1A binding protein p400; small nucleolar RNA, H/ACA box 49           | EP400; SNORA49  | 1,38 |
| F-box protein 6                                                       | FBXO6           | 1,38 |
| junctophilin 2                                                        | JPH2            | 1,38 |
| interferon induced transmembrane protein 3                            | IFITM3          | 1,38 |
| RNA binding motif protein 38                                          | RBM38           | 1,38 |
| myosin IXA                                                            | MYO9A           | 1,38 |
| PPP5 tetratricopeptide repeat domain containing 1                     | PPP5D1          | 1,38 |
| phosphodiesterase 12                                                  | PDE12           | 1,38 |
| dual specificity tyrosine-(Y)-phosphorylation regulated kinase 1B     | DYRK1B          | 1,38 |
| diacylglycerol kinase, zeta                                           | DGKZ            | 1,38 |
| polymerase (DNA directed) iota                                        | POLI            | 1,38 |
| phenylalanyl-tRNA synthetase 2, mitochondrial                         | FARS2           | 1,38 |
| zinc finger protein 578                                               | ZNF578          | 1,38 |
| adaptor-related protein complex 3, mu 1 subunit                       | AP3M1           | 1,38 |
| inositol polyphosphate multikinase                                    | IPMK            | 1,38 |
| PHD finger protein 1                                                  | PHF1            | 1,38 |
| MICAL-like 2                                                          | MICALL2         | 1,38 |
| chromosome 11 open reading frame 49                                   | C11orf49        | 1,38 |
| chloride intracellular channel 1                                      | CLIC1           | 1,38 |
| tetratricopeptide repeat, ankyrin repeat and coiled-coil containing 2 | TANC2           | 1,38 |
| G protein-coupled receptor kinase interacting ArfGAP 1                | GIT1            | 1,38 |
| collagen, type VI, alpha 3                                            | COL6A3          | 1,38 |
| BUB1 mitotic checkpoint serine/threonine kinase                       | BUB1            | 1,38 |
| sciellin                                                              | SCEL            | 1,38 |
| solute carrier family 51, alpha subunit                               | SLC51A          | 1,38 |
| endogenous Bornavirus-like nucleoprotein 1                            | EBLN1           | 1,38 |
| aquaporin 7                                                           | AQP7            | 1,38 |
| KIT ligand                                                            | KITLG           | 1,38 |
| transmembrane protein 63A                                             | TMEM63A         | 1,38 |
| aconitase 2, mitochondrial                                            | ACO2            | 1,38 |
| formin 1                                                              | FMN1            | 1,38 |
| signal transducer and activator of transcription 1                    | STAT1           | 1,38 |
| kelch-like family member 28                                           | KLHL28          | 1,37 |
| collagen, type XVII, alpha 1; microRNA 936                            | COL17A1; MIR936 | 1,37 |

|                                                                                                                  |                                   |      |
|------------------------------------------------------------------------------------------------------------------|-----------------------------------|------|
| zinc finger protein 596                                                                                          | ZNF596                            | 1,37 |
| TP53 induced glycolysis regulatory phosphatase                                                                   | TIGAR                             | 1,37 |
| ring finger protein 157                                                                                          | RNF157                            | 1,37 |
| tetratricopeptide repeat domain 24                                                                               | TTC24                             | 1,37 |
| Cbl proto-oncogene, E3 ubiquitin protein ligase                                                                  | CBL                               | 1,37 |
| growth hormone inducible transmembrane protein                                                                   | GHITM                             | 1,37 |
| interferon, alpha 10                                                                                             | IFNA10                            | 1,37 |
| NOP2/Sun domain family, member 5                                                                                 | NSUN5                             | 1,37 |
| Transcript Identified by AceView, Entrez Gene ID(s) 23126                                                        | POGZ                              | 1,37 |
| zinc finger protein 865                                                                                          | ZNF865                            | 1,37 |
| autophagy related 16-like 1                                                                                      | ATG16L1                           | 1,37 |
| family with sequence similarity 188, member A                                                                    | FAM188A                           | 1,37 |
| RNA binding motif protein 33                                                                                     | RBM33                             | 1,37 |
| dorsal inhibitory axon guidance protein                                                                          | DRAXIN                            | 1,37 |
| protease, serine, 22                                                                                             | PRSS22                            | 1,37 |
| kinase D-interacting substrate 220kDa                                                                            | KIDINS220                         | 1,37 |
| NADH dehydrogenase (ubiquinone) 1 alpha subcomplex, 10, 42kDa                                                    | NDUFA10                           | 1,37 |
| armadillo repeat containing 3                                                                                    | ARMC3                             | 1,37 |
| acylaminoacyl-peptide hydrolase                                                                                  | APEH                              | 1,37 |
| high mobility group nucleosome binding domain 5                                                                  | HMG5                              | 1,37 |
| ADAM metalloproteinase with thrombospondin type 1 motif 1                                                        | ADAMTS1                           | 1,37 |
| vacuolar protein sorting 53 homolog (S. cerevisiae); ribosomal protein S4X pseudogene 17                         | VPS53; RPS4XP17                   | 1,37 |
| glutamate receptor, ionotropic, N-methyl D-aspartate-associated protein 1 (glutamate binding)                    | GRIN1                             | 1,37 |
| tripeptidyl peptidase II                                                                                         | TPP2                              | 1,37 |
| zinc finger, DHHC-type containing 6                                                                              | ZDHHC6                            | 1,37 |
| WNT1 inducible signaling pathway protein 2                                                                       | WISP2                             | 1,37 |
| family with sequence similarity 120A opposite strand                                                             | FAM120AOS                         | 1,37 |
| alpha tubulin acetyltransferase 1                                                                                | ATAT1                             | 1,37 |
| GTF2H2 family member C, copy 2; GTF2H2 family member C; general transcription factor IIH subunit 2B (pseudogene) | GTF2H2C_2;<br>GTF2H2C;<br>GTF2H2B | 1,37 |
| T-box 21                                                                                                         | TBX21                             | 1,37 |
| Memczak2013 ALT_ACCEPTOR, ALT_DONOR, coding, INTERNAL, intronic best transcript NM_001136017                     | CCND3                             | 1,37 |
| thioredoxin-related transmembrane protein 2; chromosome 11 open reading frame 31                                 | TMX2; C11orf31                    | 1,37 |
| heat shock 27kDa protein family, member 7 (cardiovascular)                                                       | HSPB7                             | 1,37 |
| importin 11; leucine rich repeat containing 70                                                                   | IPO11; LRRC70                     | 1,37 |
| phosphorylase, glycogen; brain                                                                                   | PYGB                              | 1,37 |

|                                                                                                                  |            |      |
|------------------------------------------------------------------------------------------------------------------|------------|------|
| ubiquitin specific peptidase 11                                                                                  | USP11      | 1,37 |
| S-antigen; retina and pineal gland (arrestin)                                                                    | SAG        | 1,37 |
| chromosome 9 open reading frame 85                                                                               | C9orf85    | 1,37 |
| apolipoprotein B mRNA editing enzyme, catalytic polypeptide-like 3C                                              | APOBEC3C   | 1,37 |
| nucleolar protein 9                                                                                              | NOL9       | 1,37 |
| claspin                                                                                                          | CLSPN      | 1,37 |
| zinc finger protein 619                                                                                          | ZNF619     | 1,37 |
| zinc finger protein 330                                                                                          | ZNF330     | 1,37 |
| AVL9 homolog (S. cerevisiae)                                                                                     | AVL9       | 1,37 |
| nuclear pore complex interacting protein family, member B8                                                       | NPIPB8     | 1,37 |
| zinc finger protein 304                                                                                          | ZNF304     | 1,37 |
| Transcript Identified by AceView, Entrez Gene ID(s) 54940                                                        | OCIAD1     | 1,37 |
| claudin 19                                                                                                       | CLDN19     | 1,37 |
| DMRT-like family B with proline-rich C-terminal, 1                                                               | DMRTB1     | 1,37 |
| septin 1                                                                                                         | sept-01    | 1,37 |
| autophagy/beclin-1 regulator 1                                                                                   | AMBRA1     | 1,37 |
| amyloid beta (A4) precursor protein-binding, family B, member 2                                                  | APBB2      | 1,37 |
| zinc finger protein 610                                                                                          | ZNF610     | 1,37 |
| polymerase I and transcript release factor                                                                       | PTRF       | 1,37 |
| guanine nucleotide binding protein-like 3 (nucleolar)-like                                                       | GNL3L      | 1,37 |
| WD repeat domain 83 opposite strand                                                                              | WDR83OS    | 1,37 |
| podoplanin                                                                                                       | PDPN       | 1,37 |
| keratin 35, type I                                                                                               | KRT35      | 1,37 |
| semaphorin 7A, GPI membrane anchor (John Milton Hagen blood group)                                               | SEMA7A     | 1,37 |
| myosin XVIIIIB                                                                                                   | MYO18B     | 1,37 |
| KRAB box domain containing 4                                                                                     | KRBOX4     | 1,37 |
| sema domain, immunoglobulin domain (Ig), transmembrane domain (TM) and short cytoplasmic domain, (semaphorin) 4B | SEMA4B     | 1,37 |
| neutrophil cytosolic factor 1                                                                                    | NCF1       | 1,37 |
| solute carrier family 26 (anion exchanger), member 11                                                            | SLC26A11   | 1,37 |
| SNF8, ESCRT-II complex subunit                                                                                   | SNF8       | 1,36 |
| Rho-associated, coiled-coil containing protein kinase 2                                                          | ROCK2      | 1,36 |
| DEAD (Asp-Glu-Ala-Asp) box polypeptide 59                                                                        | DDX59      | 1,36 |
| empty spiracles homeobox 2                                                                                       | EMX2       | 1,36 |
| Transcript Identified by AceView, Entrez Gene ID(s) 8089                                                         | YEATS4     | 1,36 |
| ARRDC1 antisense RNA 1                                                                                           | ARRDC1-AS1 | 1,36 |
| ubiquitin-like 5                                                                                                 | UBL5       | 1,36 |

|                                                                                        |          |      |
|----------------------------------------------------------------------------------------|----------|------|
| SMG8 nonsense mediated mRNA decay factor                                               | SMG8     | 1,36 |
| ADAM metallopeptidase with thrombospondin type 1 motif 10                              | ADAMTS10 | 1,36 |
| ADAM metallopeptidase with thrombospondin type 1 motif 12                              | ADAMTS12 | 1,36 |
| DEAH (Asp-Glu-Ala-His) box polypeptide 35                                              | DHX35    | 1,36 |
| BCL2/adenovirus E1B 19kDa interacting protein 2                                        | BNIP2    | 1,36 |
| colony stimulating factor 3                                                            | CSF3     | 1,36 |
| proteasome subunit beta 2                                                              | PSMB2    | 1,36 |
| runt-related transcription factor 2                                                    | RUNX2    | 1,36 |
| oxysterol binding protein-like 8                                                       | OSBPL8   | 1,36 |
| Ras and Rab interactor 3                                                               | RIN3     | 1,36 |
| glutamic-oxaloacetic transaminase 1, soluble                                           | GOT1     | 1,36 |
| bassoon presynaptic cytomatrix protein                                                 | BSN      | 1,36 |
| SH2B adaptor protein 3                                                                 | SH2B3    | 1,36 |
| akirin 2                                                                               | AKIRIN2  | 1,36 |
| SIK family kinase 3                                                                    | SIK3     | 1,36 |
| solute carrier organic anion transporter family, member 5A1                            | SLCO5A1  | 1,36 |
| Jeck2013 ALT_ACCEPTOR, ALT_DONOR, coding, INTERNAL, intronic best transcript NM_032531 | KIRREL3  | 1,36 |
| heat shock transcription factor, Y-linked 2                                            | HSFY2    | 1,36 |
| syntrophin, gamma 2                                                                    | SNTG2    | 1,36 |
| protocadherin 7                                                                        | PCDH7    | 1,36 |
| ubiquitin specific peptidase 46                                                        | USP46    | 1,36 |
| ankyrin repeat domain 39                                                               | ANKRD39  | 1,36 |
| fidgetin-like 2                                                                        | FIGNL2   | 1,36 |
| ribosomal RNA processing 36                                                            | RRP36    | 1,36 |
| barttin CLCNK-type chloride channel accessory beta subunit                             | BSND     | 1,36 |
| tumor necrosis factor (ligand) superfamily, member 13b                                 | TNFSF13B | 1,36 |
| vacuolar protein sorting 37 homolog A (S. cerevisiae)                                  | VPS37A   | 1,36 |
| trace amine associated receptor 1                                                      | TAAR1    | 1,36 |
| neurogranin (protein kinase C substrate, RC3)                                          | NRGN     | 1,36 |
| estrogen receptor 2 (ER beta)                                                          | ESR2     | 1,36 |
| RAD9 checkpoint clamp component B                                                      | RAD9B    | 1,36 |
| SUMO1/sentrin/SMT3 specific peptidase 3                                                | SENP3    | 1,36 |
| CCAAT/enhancer binding protein (C/EBP), zeta                                           | CEBPZ    | 1,36 |
| ubiquitin specific peptidase 38                                                        | USP38    | 1,36 |
| ADAM metallopeptidase domain 9                                                         | ADAM9    | 1,36 |
| retinoic acid receptor, gamma                                                          | RARG     | 1,36 |
| galactosidase beta 1 like                                                              | GLB1L    | 1,36 |
| thyroid hormone responsive                                                             | THRSP    | 1,36 |
| fibroblast growth factor 20                                                            | FGF20    | 1,36 |

|                                                                                              |                |      |
|----------------------------------------------------------------------------------------------|----------------|------|
| G protein-coupled receptor 4                                                                 | GPR4           | 1,36 |
| zinc finger protein 410                                                                      | ZNF410         | 1,36 |
| alkaline phosphatase, placental like 2                                                       | ALPPL2         | 1,36 |
| kelch-like family member 20                                                                  | KLHL20         | 1,36 |
| keratin 222, type II                                                                         | KRT222         | 1,36 |
| ArfGAP with FG repeats 1; microRNA 5703                                                      | AGFG1; MIR5703 | 1,36 |
| tumor protein p53 binding protein 2                                                          | TP53BP2        | 1,36 |
| GATS, stromal antigen 3 opposite strand                                                      | GATS           | 1,36 |
| R3H domain containing 1                                                                      | R3HDM1         | 1,36 |
| zinc finger and BTB domain containing 7A                                                     | ZBTB7A         | 1,36 |
| SCY1-like, kinase-like 2                                                                     | SCYL2          | 1,36 |
| ubiquitin specific peptidase 6                                                               | USP6           | 1,36 |
| proteasome maturation protein                                                                | POMP           | 1,36 |
| cadherin 5, type 2 (vascular endothelium)                                                    | CDH5           | 1,36 |
| rabphilin 3A-like (without C2 domains)                                                       | RPH3AL         | 1,36 |
| cysteine and glycine-rich protein 2                                                          | CSRP2          | 1,36 |
| ring finger protein 103                                                                      | RNF103         | 1,36 |
| SWI5 homologous recombination repair protein                                                 | SWI5           | 1,36 |
| ERGIC and golgi 2                                                                            | ERGIC2         | 1,36 |
| Transcript Identified by AceView, Entrez Gene ID(s) 10777                                    | ARPP21         | 1,36 |
| PTPRF interacting protein, binding protein 2 (liprin beta 2)                                 | PPFIBP2        | 1,36 |
| poly(ADP-ribose) polymerase family member 14                                                 | PARP14         | 1,36 |
| zinc finger protein 501 [Source:HGNC<br>Symbol;Acc:HGNC:23717]                               | ZNF501         | 1,36 |
| leucine rich repeat and fibronectin type III domain<br>containing 2                          | LRFN2          | 1,36 |
| Transcript Identified by AceView, Entrez Gene ID(s) 7511                                     | XPNPEP1        | 1,36 |
| Memczak2013 ALT_ACCEPTOR, ALT_DONOR, coding,<br>INTERNAL, intronic best transcript NM_033071 | SYNE1          | 1,36 |
| spermatid associated                                                                         | SPERT          | 1,36 |
| sphingomyelin synthase 1                                                                     | SGMS1          | 1,36 |
| Transcript Identified by AceView, Entrez Gene ID(s)<br>135112                                | NCOA7          | 1,36 |
| FXD domain containing ion transport regulator 4                                              | FXD4           | 1,36 |
| zinc finger, FYVE domain containing 9                                                        | ZFYVE9         | 1,36 |
| chromosome 7 open reading frame 34                                                           | C7orf34        | 1,36 |
| family with sequence similarity 24, member B                                                 | FAM24B         | 1,36 |
| diaphanous-related formin 2                                                                  | DIAPH2         | 1,36 |
| brain-specific homeobox                                                                      | BSX            | 1,36 |
| tRNA methyltransferase 5                                                                     | TRMT5          | 1,36 |
| Memczak2013 ANTISENSE, coding, INTERNAL, intronic<br>best transcript NM_001170794            | BACH2          | 1,36 |



|                                                                                              |                       |      |
|----------------------------------------------------------------------------------------------|-----------------------|------|
| EPH receptor A7                                                                              | EPHA7                 | 1,36 |
| long intergenic non-protein coding RNA 482                                                   | LINC00482             | 1,36 |
| uroplakin 1B                                                                                 | UPK1B                 | 1,36 |
| centrosomal protein 164kDa                                                                   | CEP164                | 1,36 |
| actin related protein 2/3 complex subunit 5-like                                             | ARPC5L                | 1,36 |
| activating transcription factor 7; neuropeptide FF-amide peptide precursor                   | ATF7; NPFF            | 1,36 |
| ADP-ribosylation factor like GTPase 5C                                                       | ARL5C                 | 1,36 |
| barrier to autointegration factor 1                                                          | BANF1                 | 1,36 |
| shugoshin-like 2 ( <i>S. pombe</i> )                                                         | SGOL2                 | 1,36 |
| nucleoporin 107kDa                                                                           | NUP107                | 1,36 |
| ferritin, heavy polypeptide 1                                                                | FTH1                  | 1,36 |
| NAC alpha domain containing                                                                  | NACAD                 | 1,36 |
| CDK2-associated, cullin domain 1                                                             | CACUL1                | 1,36 |
| RWD domain containing 2B                                                                     | RWDD2B                | 1,36 |
| G protein-coupled receptor 50                                                                | GPR50                 | 1,36 |
| zinc finger protein 516                                                                      | ZNF516                | 1,35 |
| SH3 and multiple ankyrin repeat domains 3                                                    | SHANK3                | 1,35 |
| 5-hydroxytryptamine (serotonin) receptor 7, adenylate cyclase-coupled                        | HTR7                  | 1,35 |
| charged multivesicular body protein 5                                                        | CHMP5                 | 1,35 |
| transmembrane protein 239; chromosome 20 open reading frame 141                              | TMEM239;<br>C20orf141 | 1,35 |
| sortilin-related VPS10 domain containing receptor 1                                          | SORCS1                | 1,35 |
| melanoma associated antigen (mutated) 1-like 1                                               | MUM1L1                | 1,35 |
| WD repeat and SOCS box containing 2                                                          | WSB2                  | 1,35 |
| thymocyte selection associated                                                               | THEMIS                | 1,35 |
| proteasome 26S subunit, non-ATPase 6                                                         | PSMD6                 | 1,35 |
| ets variant 6                                                                                | ETV6                  | 1,35 |
| mannose-P-dolichol utilization defect 1                                                      | MPDU1                 | 1,35 |
| family with sequence similarity 89, member B                                                 | FAM89B                | 1,35 |
| chromosome 7 open reading frame 43; microRNA 4658                                            | C7orf43; MIR4658      | 1,35 |
| alkB homolog 3, alpha-ketoglutarate-dependent dioxygenase; SEC14-like 1 pseudogene 1         | ALKBH3;<br>SEC14L1P1  | 1,35 |
| zinc finger protein 479                                                                      | ZNF479                | 1,35 |
| importin 4                                                                                   | IPO4                  | 1,35 |
| chemokine (C-C motif) ligand 28                                                              | CCL28                 | 1,35 |
| LY6/PLAUR domain containing 1                                                                | LYPD1                 | 1,35 |
| nuclear factor I/C (CCAAT-binding transcription factor)                                      | NFIC                  | 1,35 |
| paired-like homeobox 2b                                                                      | PHOX2B                | 1,35 |
| MEF2 activating motif and SAP domain containing transcriptional regulator                    | MAMSTR                | 1,35 |
| Memczak2013 ALT_ACCEPTOR, ALT_DONOR, coding, INTERNAL, intronic best transcript NM_001076787 | TP53I11               | 1,35 |

|                                                                                           |          |      |
|-------------------------------------------------------------------------------------------|----------|------|
| BH3 interacting domain death agonist                                                      | BID      | 1,35 |
| zinc finger protein 525                                                                   | ZNF525   | 1,35 |
| RAN binding protein 6                                                                     | RANBP6   | 1,35 |
| actin-like 6A                                                                             | ACTL6A   | 1,35 |
| BSD domain containing 1                                                                   | BSDC1    | 1,35 |
| ankyrin repeat domain 12                                                                  | ANKRD12  | 1,35 |
| Memczak2013 ALT_ACCEPTOR, ALT_DONOR, coding, INTERNAL, intronic best transcript NM_013314 | BLNK     | 1,35 |
| mitofusin 2                                                                               | MFN2     | 1,35 |
| mitofusin 1                                                                               | MFN1     | 1,35 |
| transmembrane and coiled-coil domains 3                                                   | TMCO3    | 1,35 |
| general transcription factor IIIC subunit 3                                               | GTF3C3   | 1,35 |
| Memczak2013 ANTISENSE, coding, INTERNAL, intronic best transcript NM_001166373            | MARCH1   | 1,35 |
| CTD phosphatase subunit 1                                                                 | CTDP1    | 1,35 |
| AT rich interactive domain 5B (MRF1-like)                                                 | ARID5B   | 1,35 |
| HAUS augmin like complex subunit 8                                                        | HAUS8    | 1,35 |
| family with sequence similarity 114, member A2                                            | FAM114A2 | 1,35 |
| secretoglobin, family 2A, member 2                                                        | SCGB2A2  | 1,35 |
| zinc finger protein 662                                                                   | ZNF662   | 1,35 |
| ubiquitin conjugating enzyme E2A                                                          | UBE2A    | 1,35 |
| Ras homolog enriched in brain like 1                                                      | RHEBL1   | 1,35 |
| activating signal cointegrator 1 complex subunit 2                                        | ASCC2    | 1,35 |
| INO80 complex subunit B                                                                   | INO80B   | 1,35 |
| otoancorin                                                                                | OTOA     | 1,35 |
| nudix hydrolase 9                                                                         | NUDT9    | 1,35 |
| mitochondrial calcium uniporter regulator 1                                               | MCUR1    | 1,35 |
| desumoylating isopeptidase 1                                                              | DES1     | 1,35 |
| defensin, beta 1                                                                          | DEFB1    | 1,35 |
| junctophilin 4                                                                            | JPH4     | 1,35 |
| septin 10                                                                                 | sept-10  | 1,35 |
| olfactory receptor, family 52, subfamily A, member 5                                      | OR52A5   | 1,35 |
| valosin containing protein lysine (K) methyltransferase                                   | VCPKMT   | 1,35 |
| FSHD region gene 2 family, member C                                                       | FRG2C    | 1,35 |
| karyopherin alpha 1                                                                       | KPNA1    | 1,35 |
| occludin                                                                                  | OCLN     | 1,35 |
| endothelial differentiation-related factor 1                                              | EDF1     | 1,35 |
| saitohin                                                                                  | STH      | 1,35 |
| Memczak2013 ANTISENSE, CDS, coding, INTERNAL best transcript NM_001039590                 | USP9X    | 1,35 |
| chromosome 7 open reading frame 50                                                        | C7orf50  | 1,35 |
| peroxisomal biogenesis factor 14                                                          | PEX14    | 1,35 |
| Transcript Identified by AceView, Entrez Gene ID(s) 162494                                | RHBDL3   | 1,35 |
| basic helix-loop-helix family, member a9                                                  | BHLHA9   | 1,35 |

|                                                                                        |                 |      |
|----------------------------------------------------------------------------------------|-----------------|------|
| transglutaminase 3                                                                     | TGM3            | 1,35 |
| mab-21-like 2 (C. elegans)                                                             | MAB21L2         | 1,35 |
| endogenous retrovirus group K13, member 1                                              | ERVK13-1        | 1,35 |
| BCL2-like 1                                                                            | BCL2L1          | 1,35 |
| ATPase type 13A2                                                                       | ATP13A2         | 1,35 |
| thrombospondin 4                                                                       | THBS4           | 1,35 |
| serine-rich single-pass membrane protein 1                                             | SSMEM1          | 1,35 |
| IQ motif and Sec7 domain 3                                                             | IQSEC3          | 1,35 |
| GRAM domain containing 2                                                               | GRAMD2          | 1,35 |
| OTU deubiquitinase 7B                                                                  | OTUD7B          | 1,35 |
| unc-13 homolog D (C. elegans)                                                          | UNC13D          | 1,35 |
| helt bHLH transcription factor                                                         | HELT            | 1,35 |
| heat shock 70kDa protein 2                                                             | HSPA2           | 1,35 |
| TEA domain family member 1 (SV40 transcriptional enhancer factor)                      | TEAD1           | 1,35 |
| actin related protein 2/3 complex subunit 1A                                           | ARPC1A          | 1,35 |
| keratin associated protein 20-1                                                        | KRTAP20-1       | 1,35 |
| DENN/MADD domain containing 2D                                                         | DENND2D         | 1,35 |
| interleukin 9                                                                          | IL9             | 1,35 |
| myelin-associated oligodendrocyte basic protein                                        | MOBP            | 1,35 |
| olfactory receptor, family 14, subfamily A, member 16                                  | OR14A16         | 1,35 |
| inner mitochondrial membrane peptidase subunit 1                                       | IMMP1L          | 1,35 |
| ZFP64 zinc finger protein                                                              | ZFP64           | 1,35 |
| DEAD (Asp-Glu-Ala-Asp) box helicase 24                                                 | DDX24           | 1,35 |
| olfactory receptor, family 52, subfamily E, member 6                                   | OR52E6          | 1,35 |
| LMBR1 domain containing 2                                                              | LMBRD2          | 1,35 |
| ATP binding cassette subfamily A member 4                                              | ABCA4           | 1,35 |
| spastic paraplegia 7 (pure and complicated autosomal recessive)                        | SPG7            | 1,35 |
| ubiquitination factor E4A                                                              | UBE4A           | 1,35 |
| family with sequence similarity 21, member A                                           | FAM21A          | 1,35 |
| tetratricopeptide repeat domain 21A; microRNA 6822                                     | TTC21A; MIR6822 | 1,35 |
| C-x(9)-C motif containing 2                                                            | CMC2            | 1,35 |
| EGF domain-specific O-linked N-acetylglucosamine (GlcNAc) transferase                  | EOGT            | 1,35 |
| solute carrier family 35 (adenosine 3-phospho 5-phosphosulfate transporter), member B3 | SLC35B3         | 1,35 |
| PRAME family member 8                                                                  | PRAMEF8         | 1,34 |
| late endosomal/lysosomal adaptor, MAPK and MTOR activator 4                            | LAMTOR4         | 1,34 |
| zinc finger protein 616                                                                | ZNF616          | 1,34 |
| 1-acylglycerol-3-phosphate O-acyltransferase 4                                         | AGPAT4          | 1,34 |
| calcium homeostasis modulator 1                                                        | CALHM1          | 1,34 |
| BCL2-like 10 (apoptosis facilitator)                                                   | BCL2L10         | 1,34 |
| coiled-coil domain containing 30                                                       | CCDC30          | 1,34 |

|                                                                                                                                                                                                                                                                                                                                                                                                                                                                                                                           |               |      |
|---------------------------------------------------------------------------------------------------------------------------------------------------------------------------------------------------------------------------------------------------------------------------------------------------------------------------------------------------------------------------------------------------------------------------------------------------------------------------------------------------------------------------|---------------|------|
| trafficking protein particle complex 4                                                                                                                                                                                                                                                                                                                                                                                                                                                                                    | TRAPPC4       | 1,34 |
| DnaJ (Hsp40) homolog, subfamily A, member 1                                                                                                                                                                                                                                                                                                                                                                                                                                                                               | DNAJA1        | 1,34 |
| serine/threonine kinase 32C                                                                                                                                                                                                                                                                                                                                                                                                                                                                                               | STK32C        | 1,34 |
| Homo sapiens proteasome (prosome, macropain) 26S subunit, ATPase, 1, mRNA (cDNA clone MGC:8541 IMAGE:2822718), complete cds.; Homo sapiens proteasome (prosome, macropain) 26S subunit, ATPase, 1, mRNA (cDNA clone MGC:24583 IMAGE:4133348), complete cds.; Homo sapiens proteasome (prosome, macropain) 26S subunit, ATPase, 1, mRNA (cDNA clone MGC:86994 IMAGE:5264945), complete cds.; Homo sapiens proteasome (prosome, macropain) 26S subunit, ATPase, 1, mRNA (cDNA clone MGC:88853 IMAGE:5456334), complete cds. | PSMC1         | 1,34 |
| chromosome 1 open reading frame 189                                                                                                                                                                                                                                                                                                                                                                                                                                                                                       | C1orf189      | 1,34 |
| calcineurin-like EF-hand protein 2                                                                                                                                                                                                                                                                                                                                                                                                                                                                                        | CHP2          | 1,34 |
| cancer/testis antigen family 47, member B1                                                                                                                                                                                                                                                                                                                                                                                                                                                                                | CT47B1        | 1,34 |
| phosphatidylglycerophosphate synthase 1                                                                                                                                                                                                                                                                                                                                                                                                                                                                                   | PGS1          | 1,34 |
| zinc finger protein 320                                                                                                                                                                                                                                                                                                                                                                                                                                                                                                   | ZNF320        | 1,34 |
| synovial sarcoma, X breakpoint 3                                                                                                                                                                                                                                                                                                                                                                                                                                                                                          | SSX3          | 1,34 |
| MAGE family member A1                                                                                                                                                                                                                                                                                                                                                                                                                                                                                                     | MAGEA1        | 1,34 |
| autophagy related 16-like 1                                                                                                                                                                                                                                                                                                                                                                                                                                                                                               | ATG16L1       | 1,34 |
| BCL2-like 14 (apoptosis facilitator)                                                                                                                                                                                                                                                                                                                                                                                                                                                                                      | BCL2L14       | 1,34 |
| Memczak2013 ANTISENSE, coding, INTERNAL, intronic best transcript NM_175061                                                                                                                                                                                                                                                                                                                                                                                                                                               | JAZF1         | 1,34 |
| lipocalin 6                                                                                                                                                                                                                                                                                                                                                                                                                                                                                                               | LCN6          | 1,34 |
| anti-silencing function 1A histone chaperone                                                                                                                                                                                                                                                                                                                                                                                                                                                                              | ASF1A         | 1,34 |
| VPS11, CORVET/HOPS core subunit [Source:HGNC Symbol;Acc:HGNC:14583]                                                                                                                                                                                                                                                                                                                                                                                                                                                       | VPS11         | 1,34 |
| carcinoembryonic antigen-related cell adhesion molecule 8                                                                                                                                                                                                                                                                                                                                                                                                                                                                 | CEACAM8       | 1,34 |
| zinc finger CCCH-type containing 13                                                                                                                                                                                                                                                                                                                                                                                                                                                                                       | ZC3H13        | 1,34 |
| intersectin 2                                                                                                                                                                                                                                                                                                                                                                                                                                                                                                             | ITSN2         | 1,34 |
| gasdermin C                                                                                                                                                                                                                                                                                                                                                                                                                                                                                                               | GSDMC         | 1,34 |
| zinc finger protein 678                                                                                                                                                                                                                                                                                                                                                                                                                                                                                                   | ZNF678        | 1,34 |
| ATP synthase, H <sup>+</sup> transporting, mitochondrial Fo complex subunit C1 (subunit 9)                                                                                                                                                                                                                                                                                                                                                                                                                                | ATP5G1        | 1,34 |
| protein kinase N2                                                                                                                                                                                                                                                                                                                                                                                                                                                                                                         | PKN2          | 1,34 |
| Kruppel-like factor 10                                                                                                                                                                                                                                                                                                                                                                                                                                                                                                    | KLF10         | 1,34 |
| zinc finger protein 449                                                                                                                                                                                                                                                                                                                                                                                                                                                                                                   | ZNF449        | 1,34 |
| guanylate binding protein 5                                                                                                                                                                                                                                                                                                                                                                                                                                                                                               | GBP5          | 1,34 |
| actin related protein 2/3 complex subunit 1B                                                                                                                                                                                                                                                                                                                                                                                                                                                                              | ARPC1B        | 1,34 |
| bola family member 2B; bola family member 2                                                                                                                                                                                                                                                                                                                                                                                                                                                                               | BOLA2B; BOLA2 | 1,34 |
| OCIA domain containing 2                                                                                                                                                                                                                                                                                                                                                                                                                                                                                                  | OCIAD2        | 1,34 |

|                                                                                                      |                     |      |
|------------------------------------------------------------------------------------------------------|---------------------|------|
| origin recognition complex subunit 5                                                                 | ORC5                | 1,34 |
| general transcription factor IIH subunit 2                                                           | GTF2H2              | 1,34 |
| apolipoprotein L domain containing 1; DEAD (Asp-Glu-Ala-Asp) box polypeptide 47                      | APOLD1; DDX47       | 1,34 |
| ubiquitin associated protein 2 like                                                                  | UBAP2L              | 1,34 |
| trafficking protein particle complex 4; microRNA 3656                                                | TRAPPC4;<br>MIR3656 | 1,34 |
| zinc finger protein 501 [Source:HGNC<br>Symbol;Acc:HGNC:23717]                                       | ZNF501              | 1,34 |
| sparc/osteonectin, cwcv and kazal-like domains<br>proteoglycan (testican) 1                          | SPOCK1              | 1,34 |
| histone cluster 2, H2be                                                                              | HIST2H2BE           | 1,34 |
| amyloid beta (A4) precursor protein-binding, family A,<br>member 3                                   | APBA3               | 1,34 |
| RELT-like 2                                                                                          | RELL2               | 1,34 |
| RAD17 checkpoint clamp loader component                                                              | RAD17               | 1,34 |
| NDRG family member 3                                                                                 | NDRG3               | 1,34 |
| serpin peptidase inhibitor, clade I (pancpin), member 2                                              | SERPINI2            | 1,34 |
| chromosome 16 open reading frame 72                                                                  | C16orf72            | 1,34 |
| zinc finger with KRAB and SCAN domains 5                                                             | ZKSCAN5             | 1,34 |
| ras homolog family member D                                                                          | RHOD                | 1,34 |
| numb homolog (Drosophila)-like                                                                       | NUMBL               | 1,34 |
| phosphatidylinositol binding clathrin assembly protein                                               | PICALM              | 1,34 |
| ubiquitin specific peptidase 16                                                                      | USP16               | 1,34 |
| phosphatase and actin regulator 3                                                                    | PHACTR3             | 1,34 |
| proteasome 26S subunit, ATPase 2                                                                     | PSMC2               | 1,34 |
| folate receptor 1 (adult)                                                                            | FOLR1               | 1,34 |
| chemokine (C-X-C motif) ligand 17                                                                    | CXCL17              | 1,34 |
| StAR-related lipid transfer domain containing 8                                                      | STARD8              | 1,34 |
| synergin, gamma                                                                                      | SYNRG               | 1,34 |
| developmental pluripotency associated 4                                                              | DPPA4               | 1,34 |
| polycystic kidney disease 1 like 1                                                                   | PKD1L1              | 1,34 |
| junction mediating and regulatory protein, p53 cofactor                                              | JMY                 | 1,34 |
| long intergenic non-protein coding RNA 222                                                           | LINC00222           | 1,34 |
| transcription elongation factor A (SII) N-terminal and<br>central domain containing 2; microRNA 4781 | TCEANC2;<br>MIR4781 | 1,34 |
| zinc finger E-box binding homeobox 2                                                                 | ZEB2                | 1,34 |
| actin related protein 2/3 complex subunit 3                                                          | ARPC3               | 1,34 |
| phospholipase A2, group V                                                                            | PLA2G5              | 1,34 |
| biorientation of chromosomes in cell division 1-like 1                                               | BOD1L1              | 1,34 |
| myoglobin                                                                                            | MB                  | 1,34 |
| CDC42 binding protein kinase gamma (DMPK-like)                                                       | CDC42BPG            | 1,34 |
| forkhead box C2                                                                                      | FOXC2               | 1,34 |
| enkurin, TRPC channel interacting protein                                                            | ENKUR               | 1,34 |
| WD repeat domain 54                                                                                  | WDR54               | 1,34 |

|                                                                                                         |                                  |      |
|---------------------------------------------------------------------------------------------------------|----------------------------------|------|
| troponin C type 2 (fast)                                                                                | TNNC2                            | 1,34 |
| long intergenic non-protein coding RNA 525                                                              | LINC00525                        | 1,34 |
| ankyrin repeat domain 13B                                                                               | ANKRD13B                         | 1,34 |
| prostaglandin E synthase 3 (cytosolic)                                                                  | PTGES3                           | 1,34 |
| abl-interactor 2                                                                                        | ABI2                             | 1,34 |
| proteasome 26S subunit, ATPase 4                                                                        | PSMC4                            | 1,34 |
| olfactory receptor, family 5, subfamily H, member 6<br>(gene/pseudogene)                                | OR5H6                            | 1,33 |
| glutamate decarboxylase 1                                                                               | GAD1                             | 1,33 |
| sphingosine-1-phosphate receptor 1                                                                      | S1PR1                            | 1,33 |
| C1q and tumor necrosis factor related protein 9B                                                        | C1QTNF9B                         | 1,33 |
| surfactant associated 2                                                                                 | SFTA2                            | 1,33 |
| GATA zinc finger domain containing 2A; microRNA 640                                                     | GATAD2A;<br>MIR640               | 1,33 |
| 6-phosphofructo-2-kinase/fructose-2,6-biphosphatase 2                                                   | PFKFB2                           | 1,33 |
| slingshot protein phosphatase 3                                                                         | SSH3                             | 1,33 |
| GUF1 homolog, GTPase                                                                                    | GUF1                             | 1,33 |
| inositol polyphosphate-5-phosphatase D                                                                  | INPP5D                           | 1,33 |
| ubiquitin specific peptidase 45                                                                         | USP45                            | 1,33 |
| Transcript Identified by AceView, Entrez Gene ID(s) 64895                                               | PAPOLG                           | 1,33 |
| Transcript Identified by AceView, Entrez Gene ID(s)<br>124936                                           | CYB5D2                           | 1,33 |
| uncharacterized LOC102724957; novel transcript                                                          | LOC102724957;<br>RP11-396O20.1   | 1,33 |
| ADP-ribosylation factor GTPase activating protein 1;<br>microRNA 4326                                   | ARFGAP1;<br>MIR4326              | 1,33 |
| SH2 domain containing 3A                                                                                | SH2D3A                           | 1,33 |
| solute carrier family 12 (potassium/chloride transporter),<br>member 6                                  | SLC12A6                          | 1,33 |
| neuronal differentiation 4                                                                              | NEUROD4                          | 1,33 |
| reticulon 4 receptor-like 2                                                                             | RTN4RL2                          | 1,33 |
| BTAF1 RNA polymerase II, B-TFIID transcription factor-<br>associated, 170kDa                            | BTAF1                            | 1,33 |
| TAF9 RNA polymerase II, TATA box binding protein (TBP)-<br>associated factor, 32kDa; adenylate kinase 6 | TAF9; AK6                        | 1,33 |
| calcium binding and coiled-coil domain 2                                                                | CALCOCO2                         | 1,33 |
| centromere protein T                                                                                    | CENPT                            | 1,33 |
| hydroxyacylglutathione hydrolase-like                                                                   | HAGHL                            | 1,33 |
| tumor necrosis factor receptor superfamily, member 1B;<br>microRNA 4632; microRNA 7846                  | TNFRSF1B;<br>MIR4632;<br>MIR7846 | 1,33 |
| zinc finger protein 831                                                                                 | ZNF831                           | 1,33 |
| ArfGAP with coiled-coil, ankyrin repeat and PH domains 2                                                | ACAP2                            | 1,33 |

|                                                                             |               |      |
|-----------------------------------------------------------------------------|---------------|------|
| signal-induced proliferation-associated 1 like 2                            | SIPA1L2       | 1,33 |
| small muscle protein, X-linked                                              | SMPX          | 1,33 |
| TNF receptor-associated factor 5                                            | TRAF5         | 1,33 |
| C-type lectin domain family 4, member M                                     | CLEC4M        | 1,33 |
| dynein, cytoplasmic 1, heavy chain 1                                        | DYNC1H1       | 1,33 |
| spindle and kinetochore associated complex subunit 3                        | SKA3          | 1,33 |
| PRP40 homolog, pre-mRNA processing factor B                                 | PRPF40B       | 1,33 |
| KIAA1549-like                                                               | KIAA1549L     | 1,33 |
| zona pellucida glycoprotein 2 (sperm receptor)                              | ZP2           | 1,33 |
| JNK1/MAPK8-associated membrane protein                                      | JKAMP         | 1,33 |
| plakophilin 3                                                               | PKP3          | 1,33 |
| TSR1, 20S rRNA accumulation, homolog (S. cerevisiae)                        | TSR1          | 1,33 |
| 5-hydroxytryptamine (serotonin) receptor 1F, G protein-coupled              | HTR1F         | 1,33 |
| polypyrimidine tract binding protein 3                                      | PTBP3         | 1,33 |
| matrix metalloproteinase 13                                                 | MMP13         | 1,33 |
| zinc finger protein 334                                                     | ZNF334        | 1,33 |
| tubulin, alpha 4b                                                           | TUBA4B        | 1,33 |
| olfactory receptor, family 4, subfamily N, member 5                         | OR4N5         | 1,33 |
| arginase 2                                                                  | ARG2          | 1,33 |
| amyotrophic lateral sclerosis 2 chromosome region candidate 11              | ALS2CR11      | 1,33 |
| Rac/Cdc42 guanine nucleotide exchange factor 6                              | ARHGEF6       | 1,33 |
| prostaglandin reductase 2                                                   | PTGR2         | 1,33 |
| keratin 38, type I                                                          | KRT38         | 1,33 |
| guanine nucleotide binding protein (G protein), beta polypeptide 3          | GNB3          | 1,33 |
| LIM domain containing preferred translocation partner in lipoma             | LPP           | 1,33 |
| LFNG O-fucosylpeptide 3-beta-N-acetylglucosaminyltransferase; microRNA 4648 | LFNG; MIR4648 | 1,33 |
| glycogen synthase kinase 3 alpha                                            | GSK3A         | 1,33 |
| WD repeat domain 63                                                         | WDR63         | 1,33 |
| ARP1 actin-related protein 1 homolog A, centractin alpha (yeast)            | ACTR1A        | 1,33 |
| GTPase activating Rap/RanGAP domain-like 3                                  | GARNL3        | 1,33 |
| Yip1 domain family member 7                                                 | YIPF7         | 1,33 |
| trafficking protein particle complex 2-like                                 | TRAPPC2L      | 1,33 |
| lin-28 homolog A (C. elegans)                                               | LIN28A        | 1,33 |
| sorting nexin 9                                                             | SNX9          | 1,33 |
| chromodomain helicase DNA binding protein 2; microRNA 3175                  | CHD2; MIR3175 | 1,33 |
| G protein-coupled receptor, class C, group 5, member C                      | GPRC5C        | 1,33 |
| MT-RNR2-like 13                                                             | MTRNR2L13     | 1,33 |
| ATP binding cassette subfamily E member 1                                   | ABCE1         | 1,33 |

|                                                                             |                     |      |
|-----------------------------------------------------------------------------|---------------------|------|
| glutamyl-tRNA(Gln) amidotransferase, subunit B                              | GATB                | 1,33 |
| transmembrane protein 208                                                   | TMEM208             | 1,33 |
| JRK-like                                                                    | JRKL                | 1,33 |
| acidic residue methyltransferase 1                                          | ARMT1               | 1,33 |
| zinc finger, DHHC-type containing 2                                         | ZDHHC2              | 1,33 |
| RAB11 family interacting protein 5 (class I)                                | RAB11FIP5           | 1,33 |
| UPK1A antisense RNA 1                                                       | UPK1A-AS1           | 1,33 |
| Jeck2013 ANTISENSE, coding, INTERNAL, intronic best transcript NM_001207014 | SERPINH1            | 1,33 |
| nuclear RNA export factor 5                                                 | NXF5                | 1,33 |
| NIMA-related kinase 2                                                       | NEK2                | 1,33 |
| fibroblast growth factor 1 (acidic)                                         | FGF1                | 1,33 |
| troponin T type 1 (skeletal, slow)                                          | TNNT1               | 1,33 |
| forkhead box K1                                                             | FOXK1               | 1,33 |
| chemokine (C-C motif) ligand 7                                              | CCL7                | 1,33 |
| sulfotransferase family 1A member 4; sulfotransferase family 1A member 3    | SULT1A4;<br>SULT1A3 | 1,33 |
| olfactomedin 4                                                              | OLFM4               | 1,33 |
| serine peptidase inhibitor, Kunitz type 4                                   | SPINT4              | 1,33 |
| cytochrome b561 family, member D1                                           | CYB561D1            | 1,33 |
| HtrA serine peptidase 2                                                     | HTRA2               | 1,33 |
| complement component 1, q subcomponent-like 2                               | C1QL2               | 1,33 |
| growth hormone receptor                                                     | GHR                 | 1,33 |
| autophagy related 16-like 1                                                 | ATG16L1             | 1,33 |
| syntrophin, alpha 1                                                         | SNTA1               | 1,33 |
| suppressor of fused homolog (Drosophila)                                    | SUFU                | 1,33 |
| kinesin family member 3A                                                    | KIF3A               | 1,33 |
| host cell factor C1                                                         | HCFC1               | 1,33 |
| slingshot protein phosphatase 2                                             | SSH2                | 1,33 |
| nucleosome assembly protein 1-like 3                                        | NAP1L3              | 1,33 |
| calmodulin-like 6                                                           | CALML6              | 1,33 |
| transmembrane protein 167B                                                  | TMEM167B            | 1,33 |
| ALG3, alpha-1,3- mannosyltransferase                                        | ALG3                | 1,33 |
| variable charge, X-linked 3A; variable charge, X-linked                     | VCX3A; VCX          | 1,33 |
| erbb2 interacting protein                                                   | ERBB2IP             | 1,33 |
| mixed lineage kinase domain-like                                            | MLKL                | 1,33 |
| ribosome production factor 1 homolog                                        | RPF1                | 1,32 |
| phospholipase A2, group XV                                                  | PLA2G15             | 1,32 |
| 3-phosphoadenosine 5-phosphosulfate synthase 2                              | PAPSS2              | 1,32 |
| solute carrier family 2 (facilitated glucose transporter), member 1         | SLC2A1              | 1,32 |
| torsin family 1, member A (torsin A)                                        | TOR1A               | 1,32 |
| C-type lectin domain family 3, member B                                     | CLEC3B              | 1,32 |
| piezo-type mechanosensitive ion channel component 1                         | PIEZO1              | 1,32 |



|                                                                                               |           |      |
|-----------------------------------------------------------------------------------------------|-----------|------|
| neural precursor cell expressed, developmentally down-regulated 1                             | NEDD1     | 1,32 |
| small nuclear RNA activating complex polypeptide 1                                            | SNAPC1    | 1,32 |
| solute carrier family 12 (potassium/chloride transporter), member 5                           | SLC12A5   | 1,32 |
| golgi SNAP receptor complex member 2                                                          | GOSR2     | 1,32 |
| capping protein (actin filament) muscle Z-line, beta                                          | CAPZB     | 1,32 |
| coiled-coil-helix-coiled-coil-helix domain containing 5                                       | CHCHD5    | 1,32 |
| ubiquitin-conjugating enzyme E2Q family member 2                                              | UBE2Q2    | 1,32 |
| S-antigen; retina and pineal gland (arrestin)                                                 | SAG       | 1,32 |
| zinc finger, HIT-type containing 6                                                            | ZNHIT6    | 1,32 |
| tektin 4                                                                                      | TEKT4     | 1,32 |
| BicC family RNA binding protein 1                                                             | BICC1     | 1,32 |
| NADH dehydrogenase, subunit 5 (complex I)                                                     | ND5       | 1,32 |
| YTH N(6)-methyladenosine RNA binding protein 1                                                | YTHDF1    | 1,32 |
| mediator complex subunit 9                                                                    | MED9      | 1,32 |
| protein phosphatase 1, catalytic subunit, alpha isozyme                                       | PPP1CA    | 1,32 |
| SRY box 15                                                                                    | SOX15     | 1,32 |
| ethylmalonic encephalopathy 1                                                                 | ETHE1     | 1,32 |
| caspase 3                                                                                     | CASP3     | 1,32 |
| YOD1 deubiquitinase                                                                           | YOD1      | 1,32 |
| unc-45 myosin chaperone A                                                                     | UNC45A    | 1,32 |
| high mobility group nucleosomal binding domain 2                                              | HMGN2     | 1,32 |
| mutS homolog 2                                                                                | MSH2      | 1,32 |
| rhomboid 5 homolog 1 (Drosophila)                                                             | RHBDF1    | 1,32 |
| O-acyl-ADP-ribose deacylase 1                                                                 | OARD1     | 1,32 |
| protein phosphatase 3, regulatory subunit B, beta                                             | PPP3R2    | 1,32 |
| V-set and immunoglobulin domain containing 1                                                  | VSIG1     | 1,32 |
| protocadherin beta 10                                                                         | PCDHB10   | 1,32 |
| protein phosphatase 1, regulatory (inhibitor) subunit 2                                       | PPP1R2    | 1,32 |
| stress-induced phosphoprotein 1                                                               | STIP1     | 1,32 |
| glutamate decarboxylase like 1                                                                | GADL1     | 1,32 |
| RAB35, member RAS oncogene family                                                             | RAB35     | 1,32 |
| ring finger protein 112                                                                       | RNF112    | 1,32 |
| dynein, cytoplasmic 1, intermediate chain 1                                                   | DYNC1I1   | 1,32 |
| pleckstrin homology domain containing, family A member 8 pseudogene 1                         | PLEKHA8P1 | 1,32 |
| serpin peptidase inhibitor, clade E (nexin, plasminogen activator inhibitor type 1), member 3 | SERPINE3  | 1,32 |
| deoxycytidine kinase                                                                          | DCK       | 1,32 |
| solute carrier family 36 (proton/amino acid symporter), member 1                              | SLC36A1   | 1,32 |
| laminin, alpha 4                                                                              | LAMA4     | 1,32 |
| kinesin family member 13A                                                                     | KIF13A    | 1,32 |
| SPT3 homolog, SAGA and STAGA complex component                                                | SUPT3H    | 1,32 |

|                                                                           |                            |      |
|---------------------------------------------------------------------------|----------------------------|------|
| coiled-coil domain containing 39                                          | CCDC39                     | 1,32 |
| ectodysplasin A2 receptor                                                 | EDA2R                      | 1,32 |
| zinc finger protein 184                                                   | ZNF184                     | 1,32 |
| cyclin D1                                                                 | CCND1                      | 1,32 |
| NECAP endocytosis associated 1                                            | NECAP1                     | 1,32 |
| trace amine associated receptor 2                                         | TAAR2                      | 1,32 |
| pre-mRNA processing factor 4                                              | PRPF4                      | 1,32 |
| zinc finger, DHHC-type containing 3                                       | ZDHHC3                     | 1,32 |
| mitochondrial calcium uniporter                                           | MCU                        | 1,32 |
| homeobox B3; homeobox B4; microRNA 10a                                    | HOXB3; HOXB4;<br>MIR10A    | 1,32 |
| MAGE family member C2                                                     | MAGEC2                     | 1,32 |
| aprataxin and PNKP like factor                                            | APLF                       | 1,32 |
| uncharacterized LOC55338; novel transcript                                | LOC55338; CTC-<br>242N15.1 | 1,32 |
| agrin                                                                     | AGRN                       | 1,32 |
| protein kinase, membrane associated tyrosine/threonine<br>1               | PKMYT1                     | 1,32 |
| chromosome 21 open reading frame 91; C21orf91<br>overlapping transcript 1 | C21orf91;<br>C21orf91-OT1  | 1,32 |
| ATPase, aminophospholipid transporter, class I, type 8B,<br>member 1      | ATP8B1                     | 1,32 |
| spermatogenesis associated 17                                             | SPATA17                    | 1,32 |
| aspartate beta-hydroxylase domain containing 1                            | ASPHD1                     | 1,32 |
| olfactory receptor, family 2, subfamily K, member 2                       | OR2K2                      | 1,32 |
| DnaJ (Hsp40) homolog, subfamily C, member 1                               | DNAJC1                     | 1,32 |
| Transcript Identified by AceView, Entrez Gene ID(s) 5287                  | PIK3C2B                    | 1,32 |
| ubiquitin conjugating enzyme E2H                                          | UBE2H                      | 1,32 |
| ORAI calcium release-activated calcium modulator 1                        | ORAI1                      | 1,32 |
| tetraspanin 17                                                            | TSPAN17                    | 1,32 |
| zinc finger protein 724, pseudogene                                       | ZNF724P                    | 1,32 |
| TATA box binding protein                                                  | TBP                        | 1,32 |
| chromosome 10 open reading frame 107                                      | C10orf107                  | 1,32 |
| hematological and neurological expressed 1-like                           | HN1L                       | 1,32 |
| nuclear pore associated protein 1                                         | NPAP1                      | 1,32 |
| SLU7 homolog, splicing factor                                             | SLU7                       | 1,32 |
| dysferlin                                                                 | DYSF                       | 1,32 |
| lipocalin 12                                                              | LCN12                      | 1,32 |
| double homeobox 4 like 6                                                  | DUX4L6                     | 1,32 |
| double homeobox 4 like 5                                                  | DUX4L5                     | 1,32 |
| double homeobox 4 like 1                                                  | DUX4L1                     | 1,32 |
| double homeobox 4 like 3                                                  | DUX4L3                     | 1,32 |
| double homeobox 4 like 2                                                  | DUX4L2                     | 1,32 |
| AF4/FMR2 family, member 2                                                 | AFF2                       | 1,32 |

|                                                                                               |                 |      |
|-----------------------------------------------------------------------------------------------|-----------------|------|
| phospholipid phosphatase 1; ring finger protein 138, E3 ubiquitin protein ligase pseudogene 1 | PLPP1; RNF138P1 | 1,32 |
| atypical chemokine receptor 1 (Duffy blood group)                                             | ACKR1           | 1,31 |
| DEAD (Asp-Glu-Ala-Asp) box polypeptide 18                                                     | DDX18           | 1,31 |
| glycerophosphodiester phosphodiesterase 1                                                     | GDE1            | 1,31 |
| chromosome 1 open reading frame 194                                                           | C1orf194        | 1,31 |
| Down syndrome cell adhesion molecule like 1                                                   | DSCAML1         | 1,31 |
| triggering receptor expressed on myeloid cells 1                                              | TREM1           | 1,31 |
| tet methylcytosine dioxygenase 2                                                              | TET2            | 1,31 |
| RIO kinase 1                                                                                  | RIOK1           | 1,31 |
| zinc finger protein 597                                                                       | ZNF597          | 1,31 |
| Transcript Identified by AceView, Entrez Gene ID(s) 54108                                     | CHRA1           | 1,31 |
| PAS domain containing 1                                                                       | PASD1           | 1,31 |
| ankyrin repeat domain 11                                                                      | ANKRD11         | 1,31 |
| ecotropic viral integration site 2A; ecotropic viral integration site 2B                      | EVI2A; EVI2B    | 1,31 |
| activating transcription factor 6 beta                                                        | ATF6B           | 1,31 |
| annexin A8                                                                                    | ANXA8           | 1,31 |
| interleukin 17 receptor E                                                                     | IL17RE          | 1,31 |
| proteasome 26S subunit, ATPase 1                                                              | PSMC1           | 1,31 |
| transducin (beta)-like 3                                                                      | TBL3            | 1,31 |
| heat shock 70kDa protein 4                                                                    | HSPA4           | 1,31 |
| cleft lip and palate associated transmembrane protein 1                                       | CLPTM1          | 1,31 |
| Memczak2013 ANTISENSE, coding, INTERNAL, intronic best transcript NM_182734                   | PLCB1           | 1,31 |
| SYF2 pre-mRNA-splicing factor                                                                 | SYF2            | 1,31 |
| COP9 signalosome subunit 3                                                                    | COPS3           | 1,31 |
| dachsous cadherin-related 2                                                                   | DCHS2           | 1,31 |
| lactase-like                                                                                  | LCTL            | 1,31 |
| cytochrome P450, family 17, subfamily A, polypeptide 1                                        | CYP17A1         | 1,31 |
| G protein-coupled receptor 19                                                                 | GPR19           | 1,31 |
| F-box and leucine-rich repeat protein 5                                                       | FBXL5           | 1,31 |
| ring finger protein 34, E3 ubiquitin protein ligase                                           | RNF34           | 1,31 |
| zinc finger protein 816                                                                       | ZNF816          | 1,31 |
| syntaxin binding protein 2                                                                    | STXBP2          | 1,31 |
| solute carrier family 25 (mitochondrial carrier; adenine nucleotide translocator), member 31  | SLC25A31        | 1,31 |
| fatty acid binding protein 5 (psoriasis-associated)                                           | FABP5           | 1,31 |
| G antigen 10                                                                                  | GAGE10          | 1,31 |
| muscle RAS oncogene homolog                                                                   | MRAS            | 1,31 |
| zinc finger protein 501 [Source:HGNC Symbol;Acc:HGNC:23717]                                   | ZNF501          | 1,31 |
| ribosomal protein L22-like 1                                                                  | RPL22L1         | 1,31 |

|                                                                                  |           |      |
|----------------------------------------------------------------------------------|-----------|------|
| dishevelled-binding antagonist of beta-catenin 2                                 | DACT2     | 1,31 |
| cytochrome c oxidase subunit VIIIA (ubiquitous)                                  | COX8A     | 1,31 |
| PET100 homolog                                                                   | PET100    | 1,31 |
| ATPase, Na <sup>+</sup> /K <sup>+</sup> transporting, beta 4 polypeptide         | ATP1B4    | 1,31 |
| mitogen-activated protein kinase 1 interacting protein 1-like                    | MAPK1IP1L | 1,31 |
| dihydrolipoamide S-succinyltransferase (E2 component of 2-oxo-glutarate complex) | DLST      | 1,31 |
| kinesin family member 21B                                                        | KIF21B    | 1,31 |
| asparaginyl-tRNA synthetase                                                      | NARS      | 1,31 |
| NPR3-like, GATOR1 complex subunit                                                | NPRL3     | 1,31 |
| cofilin 2 (muscle)                                                               | CFL2      | 1,31 |
| olfactory receptor, family 8, subfamily I, member 2                              | OR8I2     | 1,31 |
| v-myb avian myeloblastosis viral oncogene homolog                                | MYB       | 1,31 |
| F-box and leucine-rich repeat protein 20                                         | FBXL20    | 1,31 |
| potassium channel, two pore domain subfamily K, member 3                         | KCNK3     | 1,31 |
| zinc finger protein 507                                                          | ZNF507    | 1,31 |
| EML2 antisense RNA 1                                                             | EML2-AS1  | 1,31 |
| family with sequence similarity 175, member B                                    | FAM175B   | 1,31 |
| zinc finger, SWIM-type containing 1                                              | ZSWIM1    | 1,31 |
| cilia and flagella associated protein 58                                         | CFAP58    | 1,31 |
| charged multivesicular body protein 4C                                           | CHMP4C    | 1,31 |
| YTH domain containing 2                                                          | YTHDC2    | 1,31 |
| forkhead box J2                                                                  | FOXJ2     | 1,31 |
| chromosome 17 open reading frame 105                                             | C17orf105 | 1,31 |
| trinucleotide repeat containing 6A                                               | TNRC6A    | 1,31 |
| zinc finger protein 350                                                          | ZNF350    | 1,31 |
| solute carrier family 35, member B1                                              | SLC35B1   | 1,31 |
| TATA box binding protein like 2                                                  | TBPL2     | 1,31 |
| TBC1 domain family, member 26                                                    | TBC1D26   | 1,31 |
| repulsive guidance molecule family member b                                      | RGMB      | 1,31 |
| iroquois homeobox 5                                                              | IRX5      | 1,31 |
| VPS11, CORVET/HOPS core subunit [Source:HGNC Symbol;Acc:HGNC:14583]              | VPS11     | 1,31 |
| integrin beta 6                                                                  | ITGB6     | 1,31 |
| prickle homolog 2                                                                | PRICKLE2  | 1,31 |
| coiled-coil domain containing 93                                                 | CCDC93    | 1,31 |
| CD209 molecule                                                                   | CD209     | 1,31 |
| T-box, brain, 1                                                                  | TBR1      | 1,31 |
| plexin B2                                                                        | PLXNB2    | 1,31 |
| ATPase, H <sup>+</sup> transporting, lysosomal 13kDa, V1 subunit G1              | ATP6V1G1  | 1,31 |
| regenerating islet-derived 3 alpha                                               | REG3A     | 1,31 |
| L antigen family, member 3                                                       | LAGE3     | 1,31 |

|                                                                                                                                                                                                   |                                        |      |
|---------------------------------------------------------------------------------------------------------------------------------------------------------------------------------------------------|----------------------------------------|------|
| ArfGAP with coiled-coil, ankyrin repeat and PH domains 1                                                                                                                                          | ACAP1                                  | 1,31 |
| nuclear receptor corepressor 2                                                                                                                                                                    | NCOR2                                  | 1,31 |
| PRAME family member 6; PRAME family member 5                                                                                                                                                      | PRAMEF6;<br>PRAMEF5                    | 1,31 |
| Transcript Identified by AceView, Entrez Gene ID(s) 79875                                                                                                                                         | THSD4                                  | 1,31 |
| MAP/microtubule affinity-regulating kinase 2                                                                                                                                                      | MARK2                                  | 1,31 |
| solute carrier family 1 (high affinity aspartate/glutamate transporter), member 6                                                                                                                 | SLC1A6                                 | 1,31 |
| RIB43A domain with coiled-coils 1                                                                                                                                                                 | RIBC1                                  | 1,31 |
| large tumor suppressor kinase 2                                                                                                                                                                   | LATS2                                  | 1,31 |
| myosin light chain kinase 3                                                                                                                                                                       | MYLK3                                  | 1,31 |
| NGFI-A binding protein 2 (EGR1 binding protein 2)                                                                                                                                                 | NAB2                                   | 1,31 |
| deleted in azoospermia 4; deleted in azoospermia 1                                                                                                                                                | DAZ4; DAZ1                             | 1,31 |
| cystatin F (leukocystatin)                                                                                                                                                                        | CST7                                   | 1,31 |
| protease, serine, 1 (trypsin 1)                                                                                                                                                                   | PRSS1                                  | 1,31 |
| helicase (DNA) B                                                                                                                                                                                  | HELB                                   | 1,31 |
| MYB antisense RNA 1 [Source:HGNC Symbol;Acc:HGNC:37457]; Memczak2013 ANTISENSE, coding, INTERNAL, intronic best transcript NM_005375; putative novel transcript; Transcript Identified by AceView | MYB-AS1; MYB;<br>RP1-32B1.3;<br>rawjer | 1,31 |
| MX dynamin-like GTPase 1                                                                                                                                                                          | MX1                                    | 1,31 |
| double C2-like domains, alpha                                                                                                                                                                     | DOC2A                                  | 1,31 |
| FRAS1 related extracellular matrix 3                                                                                                                                                              | FREM3                                  | 1,31 |
| cutC copper transporter                                                                                                                                                                           | CUTC                                   | 1,31 |
| mitochondrial intermediate peptidase                                                                                                                                                              | MIPEP                                  | 1,30 |
| NME/NM23 family member 7                                                                                                                                                                          | NME7                                   | 1,30 |
| ribonuclease, RNase A family, 9 (non-active)                                                                                                                                                      | RNASE9                                 | 1,30 |
| chemokine (C-C motif) receptor 2                                                                                                                                                                  | CCR2                                   | 1,30 |
| serine/threonine/tyrosine kinase 1                                                                                                                                                                | STYK1                                  | 1,30 |
| oxysterol binding protein-like 11                                                                                                                                                                 | OSBPL11                                | 1,30 |
| actin binding LIM protein family, member 2                                                                                                                                                        | ABLIM2                                 | 1,30 |
| chromosome 11 open reading frame 44                                                                                                                                                               | C11orf44                               | 1,30 |
| chromosome 12 open reading frame 49                                                                                                                                                               | C12orf49                               | 1,30 |
| twist family bHLH transcription factor 1                                                                                                                                                          | TWIST1                                 | 1,30 |
| proteasome 26S subunit, ATPase 4 [Source:HGNC Symbol;Acc:HGNC:9551]                                                                                                                               | PSMC4                                  | 1,30 |
| metallothionein 4                                                                                                                                                                                 | MT4                                    | 1,30 |
| ret finger protein-like 4B                                                                                                                                                                        | RFPL4B                                 | 1,30 |
| MON1 secretory trafficking family member B                                                                                                                                                        | MON1B                                  | 1,30 |
| brain expressed X-linked 2                                                                                                                                                                        | BEX2                                   | 1,30 |
| lysophosphatidic acid receptor 2                                                                                                                                                                  | LPAR2                                  | 1,30 |
| CDK5 regulatory subunit associated protein 3                                                                                                                                                      | CDK5RAP3                               | 1,30 |

|                                                                                                                                                                                                                      |                                 |      |
|----------------------------------------------------------------------------------------------------------------------------------------------------------------------------------------------------------------------|---------------------------------|------|
| tripartite motif containing 37                                                                                                                                                                                       | TRIM37                          | 1,30 |
| zinc finger, CCH-type with G-patch domain; Lck interacting transmembrane adaptor 1                                                                                                                                   | ZGPAT; LIME1                    | 1,30 |
| kelch domain containing 8B                                                                                                                                                                                           | KLHDC8B                         | 1,30 |
| estrogen-related receptor gamma                                                                                                                                                                                      | ESRRG                           | 1,30 |
| N-acetyltransferase 1 (arylamine N-acetyltransferase)                                                                                                                                                                | NAT1                            | 1,30 |
| potassium channel, inwardly rectifying subfamily J, member 5                                                                                                                                                         | KCNJ5                           | 1,30 |
| WD repeat domain 37                                                                                                                                                                                                  | WDR37                           | 1,30 |
| zinc finger protein 576                                                                                                                                                                                              | ZNF576                          | 1,30 |
| Dab, reelin signal transducer, homolog 1 (Drosophila)                                                                                                                                                                | DAB1                            | 1,30 |
| calcium channel, voltage-dependent, P/Q type, alpha 1A subunit                                                                                                                                                       | CACNA1A                         | 1,30 |
| Transcript Identified by AceView, Entrez Gene ID(s) 64478                                                                                                                                                            | CSMD1                           | 1,30 |
| inositol 1,3,4,5,6-pentakisphosphate 2-kinase                                                                                                                                                                        | IPPK                            | 1,30 |
| Memczak2013 ANTISENSE, coding, INTERNAL, intronic best transcript NM_001018                                                                                                                                          | RPS15                           | 1,30 |
| HMG-box transcription factor 1                                                                                                                                                                                       | HBP1                            | 1,30 |
| ceroid-lipofuscinosis, neuronal 5                                                                                                                                                                                    | CLN5                            | 1,30 |
| zinc finger, AN1-type domain 6                                                                                                                                                                                       | ZFAND6                          | 1,30 |
| Myb-like, SWIRM and MPN domains 1                                                                                                                                                                                    | MYSM1                           | 1,30 |
| Homo sapiens family with sequence similarity 231, member A (FAM231A), mRNA.; Homo sapiens family with sequence similarity 231, member C (FAM231C), mRNA.; Protein FAM231A/C [Source:UniProtKB/Swiss-Prot;Acc:A6NEA5] | FAM231A; FAM231C; RP5-1182A14.6 | 1,30 |
| Transcript Identified by AceView, Entrez Gene ID(s) 339500                                                                                                                                                           | ZNF678                          | 1,30 |
| mitogen-activated protein kinase 12                                                                                                                                                                                  | MAPK12                          | 1,30 |
| spermatogenesis associated 21                                                                                                                                                                                        | SPATA21                         | 1,30 |
| zinc finger protein 454                                                                                                                                                                                              | ZNF454                          | 1,30 |
| glutaredoxin, cysteine rich 2                                                                                                                                                                                        | GRXCR2                          | 1,30 |
| RUN and FYVE domain containing 4                                                                                                                                                                                     | RUFY4                           | 1,30 |
| ring finger protein 40, E3 ubiquitin protein ligase                                                                                                                                                                  | RNF40                           | 1,30 |
| Memczak2013 ANTISENSE, coding, INTERNAL, intronic best transcript NM_001105192                                                                                                                                       | TLE3                            | 1,30 |
| TATA box binding protein (TBP)-associated factor, RNA polymerase I, B, 63kDa                                                                                                                                         | TAF1B                           | 1,30 |
| zinc finger CCH-type containing 18                                                                                                                                                                                   | ZC3H18                          | 1,30 |
| clusterin associated protein 1                                                                                                                                                                                       | CLUAP1                          | 1,30 |
| solute carrier family 25 (mitochondrial carrier; phosphate carrier), member 25                                                                                                                                       | SLC25A25                        | 1,30 |
| centrosomal protein 41kDa                                                                                                                                                                                            | CEP41                           | 1,30 |

|                                                                                                    |              |      |
|----------------------------------------------------------------------------------------------------|--------------|------|
| histocompatibility (minor) 13; malignant T-cell amplified sequence 2, pseudogene                   | HM13; MCTS2P | 1,30 |
| translocase of outer mitochondrial membrane 5 homolog (yeast)                                      | TOMM5        | 1,30 |
| ISL LIM homeobox 2                                                                                 | ISL2         | 1,30 |
| apoptosis inhibitor 5                                                                              | API5         | 1,30 |
| oleoyl-ACP hydrolase                                                                               | OLAH         | 1,30 |
| potassium channel, voltage gated shaker related subfamily A, member 3                              | KCNA3        | 1,30 |
| proteasome 26S subunit, non-ATPase 9                                                               | PSMD9        | 1,30 |
| C2CD2-like                                                                                         | C2CD2L       | 1,30 |
| phosphatidylinositol glycan anchor biosynthesis class C                                            | PIGC         | 1,30 |
| signal peptide peptidase like 2C                                                                   | SPPL2C       | 1,30 |
| XPA binding protein 2                                                                              | XAB2         | 1,30 |
| Memczak2013 ANTISENSE, coding, INTERNAL, intronic best transcript NM_018150                        | RNF220       | 1,30 |
| leucine rich repeat (in FLII) interacting protein 1                                                | LRRFIP1      | 1,30 |
| malonyl-CoA-acyl carrier protein transacylase                                                      | MCAT         | 1,30 |
| centrosomal protein 68kDa                                                                          | CEP68        | 1,30 |
| defensin, beta 118                                                                                 | DEFB118      | 1,30 |
| Ras interacting protein 1                                                                          | RASIP1       | 1,30 |
| ventricular zone expressed PH domain containing 1                                                  | VEPH1        | 1,30 |
| polymerase (RNA) III (DNA directed) polypeptide F, 39 kDa                                          | POLR3F       | 1,30 |
| ecto-NOX disulfide-thiol exchanger 1                                                               | ENOX1        | 1,30 |
| catenin (cadherin-associated protein), delta 2                                                     | CTNND2       | 1,30 |
| ubiquitin 2                                                                                        | UBN2         | 1,30 |
| hippocalcin                                                                                        | HPCA         | 1,30 |
| phosphorylase, glycogen, muscle                                                                    | PYGM         | 1,30 |
| crystallin gamma S                                                                                 | CRYGS        | 1,30 |
| trafficking protein particle complex 4                                                             | TRAPPC4      | 1,30 |
| F-box protein 28                                                                                   | FBXO28       | 1,30 |
| Memczak2013 ALT_ACCEPTOR, ALT_DONOR, coding, INTERNAL, intronic best transcript NM_001202557       | CD44         | 1,30 |
| tektin 4 pseudogene 2                                                                              | TEKT4P2      | 1,30 |
| Zhang2013 ALT_ACCEPTOR, ALT_DONOR, coding, INTERNAL, intronic, OVERLAPTX best transcript NM_014501 | UBE2S        | 1,30 |
| adaptor-related protein complex 3, beta 2 subunit                                                  | AP3B2        | 1,30 |
| SHOC2 leucine-rich repeat scaffold protein                                                         | SHOC2        | 1,30 |
| nudC nuclear distribution protein                                                                  | NUDC         | 1,30 |
| small glutamine-rich tetratricopeptide repeat (TPR)-containing, beta                               | SGTB         | 1,30 |
| transmembrane protease, serine 11F                                                                 | TMPRSS11F    | 1,30 |
| paired-like homeodomain 1                                                                          | PITX1        | 1,30 |

|                                                                         |                                |      |
|-------------------------------------------------------------------------|--------------------------------|------|
| calmodulin binding transcription activator 1                            | CAMTA1                         | 1,30 |
| solute carrier family 35, member G4                                     | SLC35G4                        | 1,30 |
| lymphocyte antigen 9                                                    | LY9                            | 1,30 |
| trafficking protein particle complex 4                                  | TRAPPC4                        | 1,30 |
| microRNA 4738; H3 histone, family 3B (H3.3B)                            | MIR4738; H3F3B                 | 1,30 |
| C-type lectin domain family 18, member C                                | CLEC18C                        | 1,30 |
| cell death-inducing DFFA-like effector a                                | CIDEA                          | 1,30 |
| poly(A) binding protein, cytoplasmic 4-like                             | PABPC4L                        | 1,30 |
| chromosome X open reading frame 58                                      | CXorf58                        | 1,30 |
| cytochrome P450, family 1, subfamily A, polypeptide 1                   | CYP1A1                         | 1,30 |
| zinc finger, DHHC-type containing 1                                     | ZDHHC1                         | 1,30 |
| Transcript Identified by AceView, Entrez Gene ID(s) 23126               | POGZ                           | 1,30 |
| chorionic somatomammotropin hormone-like 1                              | CSHL1                          | 1,30 |
| RIC8 guanine nucleotide exchange factor A; microRNA 6743                | RIC8A; MIR6743                 | 1,30 |
| uncharacterized LOC100287225; novel transcript                          | LOC100287225;<br>RP11-267C16.1 | 1,29 |
| Memczak2013 ANTISENSE, CDS, coding, INTERNAL best transcript NM_022118  | RBM26                          | 1,29 |
| G0/G1 switch 2                                                          | G0S2                           | 1,29 |
| calsyntenin 2                                                           | CLSTN2                         | 1,29 |
| WAP four-disulfide core domain 6                                        | WFDC6                          | 1,29 |
| N-acetyltransferase 6 (GCN5-related)                                    | NAT6                           | 1,29 |
| RecQ helicase-like 5                                                    | RECQL5                         | 1,29 |
| ferritin, light polypeptide                                             | FTL                            | 1,29 |
| cache domain containing 1                                               | CACHD1                         | 1,29 |
| CGRP receptor component                                                 | CRCP                           | 1,29 |
| protein phosphatase 1, regulatory subunit 35                            | PPP1R35                        | 1,29 |
| growth arrest-specific 6                                                | GAS6                           | 1,29 |
| SPEG complex locus                                                      | SPEG                           | 1,29 |
| urocortin 2                                                             | UCN2                           | 1,29 |
| sodium channel, voltage gated, type VIII alpha subunit                  | SCN8A                          | 1,29 |
| hyperpolarization activated cyclic nucleotide gated potassium channel 1 | HCN1                           | 1,29 |
| stromal cell-derived factor 2                                           | SDF2                           | 1,29 |
| membrane bound O-acyltransferase domain containing 7                    | MBOAT7                         | 1,29 |
| zinc finger protein 718                                                 | ZNF718                         | 1,29 |
| WD repeat domain 27                                                     | WDR27                          | 1,29 |
| THUMPD3 antisense RNA 1                                                 | THUMPD3-AS1                    | 1,29 |
| KIAA1524                                                                | KIAA1524                       | 1,29 |
| mitochondrial ribosomal protein L20                                     | MRPL20                         | 1,29 |
| SRY box 1                                                               | SOX1                           | 1,29 |
| tetratricopeptide repeat domain 5                                       | TTC5                           | 1,29 |



|                                                                                                                          |                      |      |
|--------------------------------------------------------------------------------------------------------------------------|----------------------|------|
| formin 1                                                                                                                 | FMN1                 | 1,29 |
| transmembrane protein 107; small nucleolar RNA, C/D box 118                                                              | TMEM107;<br>SNORD118 | 1,29 |
| zinc finger protein 300                                                                                                  | ZNF300               | 1,29 |
| testis specific 10                                                                                                       | TSGA10               | 1,29 |
| microtubule-actin crosslinking factor 1; KIAA0754                                                                        | MACF1; KIAA0754      | 1,29 |
| alcohol dehydrogenase, iron containing 1; chromosome 8 open reading frame 46                                             | ADHFE1; C8orf46      | 1,29 |
| PDZ domain containing 3                                                                                                  | PDZD3                | 1,29 |
| cornichon family AMPA receptor auxiliary protein 2                                                                       | CNIH2                | 1,29 |
| leucine rich repeat containing 57                                                                                        | LRRC57               | 1,29 |
| X-ray repair complementing defective repair in Chinese hamster cells 5 (double-strand-break rejoining)                   | XRCC5                | 1,29 |
| phosphatidylinositol 3-kinase, catalytic subunit type 3                                                                  | PIK3C3               | 1,29 |
| Transcript Identified by AceView; Memczak2013 ANTISENSE, CDS, coding, INTERNAL, intronic, UTR5 best transcript NM_018284 | flawmawbo;<br>GBP3   | 1,29 |
| Jun dimerization protein 2                                                                                               | JDP2                 | 1,29 |
| lipase, family member M                                                                                                  | LIPM                 | 1,29 |
| ret finger protein-like 3                                                                                                | RFPL3                | 1,29 |
| zinc finger CCCH-type containing 12D                                                                                     | ZC3H12D              | 1,29 |
| GRB10 interacting GYF protein 2                                                                                          | GIGYF2               | 1,29 |
| casein alpha s1                                                                                                          | CSN1S1               | 1,29 |
| metallophosphoesterase domain containing 2                                                                               | MPPED2               | 1,29 |
| SprT-like N-terminal domain                                                                                              | SPRTN                | 1,29 |
| caspase recruitment domain family, member 9                                                                              | CARD9                | 1,29 |
| Transcript Identified by AceView, Entrez Gene ID(s) 4114                                                                 | MAGEB3               | 1,29 |
| MAP/microtubule affinity-regulating kinase 1                                                                             | MARK1                | 1,29 |
| EH domain containing 1                                                                                                   | EHD1                 | 1,29 |
| actin-like 7B                                                                                                            | ACTL7B               | 1,29 |
| slit guidance ligand 3                                                                                                   | SLIT3                | 1,29 |
| keratin 10, type I                                                                                                       | KRT10                | 1,29 |
| SH3 and PX domains 2B                                                                                                    | SH3PXD2B             | 1,29 |
| translocase of inner mitochondrial membrane 50 homolog (S. cerevisiae)                                                   | TIMM50               | 1,29 |
| actin related protein 2/3 complex subunit 5                                                                              | ARPC5                | 1,29 |
| small integral membrane protein 12                                                                                       | SMIM12               | 1,29 |
| collagen, type VI, alpha 6                                                                                               | COL6A6               | 1,29 |
| dedicator of cytokinesis 1                                                                                               | DOCK1                | 1,29 |
| tetratricopeptide repeat domain 26                                                                                       | TTC26                | 1,29 |
| anillin actin binding protein                                                                                            | ANLN                 | 1,29 |
| GSG1-like 2                                                                                                              | GSG1L2               | 1,29 |
| down-regulator of transcription 1                                                                                        | DR1                  | 1,29 |

|                                                                                                        |                       |      |
|--------------------------------------------------------------------------------------------------------|-----------------------|------|
| fibroblast growth factor receptor substrate 3                                                          | FRS3                  | 1,29 |
| CASP8 and FADD like apoptosis regulator                                                                | CFLAR                 | 1,29 |
| titin-cap                                                                                              | TCAP                  | 1,29 |
| solute carrier family 22 (organic anion transporter), member 6                                         | SLC22A6               | 1,29 |
| tumor suppressing subtransferable candidate 1                                                          | TSSC1                 | 1,29 |
| ribosomal protein S6 kinase, 90kDa, polypeptide 1                                                      | RPS6KA1               | 1,29 |
| protein kinase D3                                                                                      | PRKD3                 | 1,29 |
| SH3 and cysteine rich domain 3                                                                         | STAC3                 | 1,29 |
| REX1, RNA exonuclease 1 homolog-like 11, pseudogene                                                    | REXO1L11P             | 1,29 |
| aminoacyl tRNA synthetase complex-interacting multifunctional protein 1                                | AIMP1                 | 1,29 |
| 3-hydroxyacyl-CoA dehydratase 1                                                                        | HACD1                 | 1,29 |
| cadherin-related family member 4                                                                       | CDHR4                 | 1,29 |
| calsequestrin 2 (cardiac muscle)                                                                       | CASQ2                 | 1,29 |
| solute carrier family 29 (equilibrative nucleoside transporter), member 3                              | SLC29A3               | 1,29 |
| alpha kinase 3                                                                                         | ALPK3                 | 1,29 |
| discs, large (Drosophila) homolog-associated protein 3                                                 | DLGAP3                | 1,29 |
| fatty acid binding protein 6, ileal                                                                    | FABP6                 | 1,29 |
| Memczak2013 ANTISENSE, coding, INTERNAL, intronic best transcript NM_173464                            | L3MBTL4               | 1,29 |
| progesterone and adipoQ receptor family member VI                                                      | PAQR6                 | 1,29 |
| maestro heat-like repeat family member 2A                                                              | MROH2A                | 1,29 |
| keratin associated protein 4-11                                                                        | KRTAP4-11             | 1,29 |
| eukaryotic translation initiation factor 2B, subunit 1 alpha, 26kDa                                    | EIF2B1                | 1,29 |
| SRY box 2                                                                                              | SOX2                  | 1,29 |
| SNU13 homolog, small nuclear ribonucleoprotein (U4/U6.U5)                                              | SNU13                 | 1,29 |
| disrupted in schizophrenia 1                                                                           | DISC1                 | 1,29 |
| dispatched homolog 1 (Drosophila)                                                                      | DISP1                 | 1,29 |
| PHD finger protein 12                                                                                  | PHF12                 | 1,29 |
| tumor protein D52-like 3                                                                               | TPD52L3               | 1,29 |
| heat shock transcription factor family, X-linked 2; heat shock transcription factor family, X-linked 1 | HSFX2; HSFX1          | 1,29 |
| xeroderma pigmentosum, complementation group C                                                         | XPC                   | 1,29 |
| paired box 5                                                                                           | PAX5                  | 1,29 |
| SUMO1/sentrin specific peptidase 7                                                                     | SEN7                  | 1,29 |
| spla/ryanodine receptor domain and SOCS box containing 2                                               | SPSB2                 | 1,29 |
| DMRT-like family C1B; DMRT-like family C1                                                              | DMRTC1B; DMRTC1       | 1,29 |
| golgin A6 family-like 5, pseudogene; golgin A6 family-like 17, pseudogene                              | GOLGA6L5P; GOLGA6L17P | 1,28 |

|                                                                                           |             |      |
|-------------------------------------------------------------------------------------------|-------------|------|
| cytosolic thiouridylase subunit 2 homolog (S. pombe)                                      | CTU2        | 1,28 |
| Memczak2013 ANTISENSE, coding, INTERNAL, intronic<br>best transcript NM_024830            | LPCAT1      | 1,28 |
| tripartite motif family like 2                                                            | TRIML2      | 1,28 |
| SUMO1 activating enzyme subunit 1                                                         | SAE1        | 1,28 |
| mitogen-activated protein kinase-activated protein kinase<br>3                            | MAPKAPK3    | 1,28 |
| sodium channel, non voltage gated 1 gamma subunit                                         | SCNN1G      | 1,28 |
| fibrous sheath interacting protein 2                                                      | FSIP2       | 1,28 |
| transmembrane and coiled-coil domains 5A                                                  | TMCO5A      | 1,28 |
| ENTH domain containing 2                                                                  | ENTHD2      | 1,28 |
| HECT and RLD domain containing E3 ubiquitin protein<br>ligase 3                           | HERC3       | 1,28 |
| hemicentin 1                                                                              | HMCN1       | 1,28 |
| transmembrane protein 262                                                                 | TMEM262     | 1,28 |
| egl-9 family hypoxia-inducible factor 3                                                   | EGLN3       | 1,28 |
| chimerin 1                                                                                | CHN1        | 1,28 |
| calcium/calmodulin-dependent protein kinase II beta                                       | CAMK2B      | 1,28 |
| protein tyrosine phosphatase, receptor type, Q                                            | PTPRQ       | 1,28 |
| v-rel avian reticuloendotheliosis viral oncogene homolog<br>A                             | RELA        | 1,28 |
| oral-facial-digital syndrome 1                                                            | OFD1        | 1,28 |
| zinc finger protein 30                                                                    | ZNF30       | 1,28 |
| keratin 6A, type II                                                                       | KRT6A       | 1,28 |
| wingless-type MMTV integration site family, member 5A                                     | WNT5A       | 1,28 |
| Memczak2013 ANTISENSE, CDS, coding, INTERNAL,<br>intronic, UTR3 best transcript NM_203305 | FAM102A     | 1,28 |
| cyclin L2                                                                                 | CCNL2       | 1,28 |
| poly(rC) binding protein 3                                                                | PCBP3       | 1,28 |
| PITPNM family member 3                                                                    | PITPNM3     | 1,28 |
| Transcript Identified by AceView, Entrez Gene ID(s) 89910                                 | UBE3B       | 1,28 |
| ATP5S-like                                                                                | ATP5SL      | 1,28 |
| acyl-CoA synthetase medium-chain family member 1                                          | ACSM1       | 1,28 |
| WD repeat domain 74                                                                       | WDR74       | 1,28 |
| corticotropin releasing hormone receptor 2                                                | CRHR2       | 1,28 |
| Transcript Identified by AceView, Entrez Gene ID(s) 54870                                 | QRICH1      | 1,28 |
| ubiquitin specific peptidase 17-like family member 1                                      | USP17L1     | 1,28 |
| leucine zipper protein 6; myotrophin                                                      | LUZP6; MTPN | 1,28 |
| sialidase 3 (membrane sialidase)                                                          | NEU3        | 1,28 |
| megakaryocyte-associated tyrosine kinase                                                  | MATK        | 1,28 |
| arylacetamide deacetylase                                                                 | AADAC       | 1,28 |
| microtubule associated serine/threonine kinase 2                                          | MAST2       | 1,28 |

|                                                                                                                                                                                                                                                                                                                              |                                       |      |
|------------------------------------------------------------------------------------------------------------------------------------------------------------------------------------------------------------------------------------------------------------------------------------------------------------------------------|---------------------------------------|------|
| zinc finger with KRAB and SCAN domains 3                                                                                                                                                                                                                                                                                     | ZKSCAN3                               | 1,28 |
| EF-hand domain family member D1                                                                                                                                                                                                                                                                                              | EFHD1                                 | 1,28 |
| transmembrane protein 50B                                                                                                                                                                                                                                                                                                    | TMEM50B                               | 1,28 |
| S-phase kinase-associated protein 1                                                                                                                                                                                                                                                                                          | SKP1                                  | 1,28 |
| diablo, IAP-binding mitochondrial protein                                                                                                                                                                                                                                                                                    | DIABLO                                | 1,28 |
| folylpolyglutamate synthase                                                                                                                                                                                                                                                                                                  | FPGS                                  | 1,28 |
| Transcript Identified by AceView, Entrez Gene ID(s) 3030                                                                                                                                                                                                                                                                     | HADHA                                 | 1,28 |
| caseinolytic mitochondrial matrix peptidase proteolytic subunit                                                                                                                                                                                                                                                              | CLPP                                  | 1,28 |
| defensin, beta 129                                                                                                                                                                                                                                                                                                           | DEFB129                               | 1,28 |
| serpin peptidase inhibitor, clade B (ovalbumin), member 5                                                                                                                                                                                                                                                                    | SERPINB5                              | 1,28 |
| serum response factor binding protein 1                                                                                                                                                                                                                                                                                      | SRFBP1                                | 1,28 |
| transmembrane protein 231                                                                                                                                                                                                                                                                                                    | TMEM231                               | 1,28 |
| polymerase (RNA) II (DNA directed) polypeptide C, 33kDa                                                                                                                                                                                                                                                                      | POLR2C                                | 1,28 |
| glycerophosphodiester phosphodiesterase domain containing 3                                                                                                                                                                                                                                                                  | GDPD3                                 | 1,28 |
| Rap guanine nucleotide exchange factor 2                                                                                                                                                                                                                                                                                     | RAPGEF2                               | 1,28 |
| Rho guanine nucleotide exchange factor 3                                                                                                                                                                                                                                                                                     | ARHGEF3                               | 1,28 |
| G protein pathway suppressor 2                                                                                                                                                                                                                                                                                               | GPS2                                  | 1,28 |
| cytochrome c oxidase subunit VIIa polypeptide 2 (liver)                                                                                                                                                                                                                                                                      | COX7A2                                | 1,28 |
| serpin peptidase inhibitor, clade B (ovalbumin), member 1                                                                                                                                                                                                                                                                    | SERPINB1                              | 1,28 |
| INO80 complex subunit E                                                                                                                                                                                                                                                                                                      | INO80E                                | 1,28 |
| Homo sapiens proline dehydrogenase (oxidase) 1 (PRODH), transcript variant 2, mRNA.; Homo sapiens proline dehydrogenase (oxidase) 1 (PRODH), transcript variant 1, mRNA.; proline dehydrogenase 1, mitochondrial; Homo sapiens proline dehydrogenase (oxidase) 1, mRNA (cDNA clone MGC:148079 IMAGE:40108133), complete cds. | PRODH;<br>LOC102724788;<br>AC007325.2 | 1,28 |
| hes family bHLH transcription factor 7                                                                                                                                                                                                                                                                                       | HES7                                  | 1,28 |
| transmembrane and coiled-coil domains 1                                                                                                                                                                                                                                                                                      | TMCO1                                 | 1,28 |
| stabilizer of axonemal microtubules 1                                                                                                                                                                                                                                                                                        | SAXO1                                 | 1,28 |
| ral guanine nucleotide dissociation stimulator                                                                                                                                                                                                                                                                               | RALGDS                                | 1,28 |
| E74-like factor 5 (ets domain transcription factor)                                                                                                                                                                                                                                                                          | ELF5                                  | 1,28 |
| lysyl-tRNA synthetase                                                                                                                                                                                                                                                                                                        | KARS                                  | 1,28 |
| family with sequence similarity 92, member B                                                                                                                                                                                                                                                                                 | FAM92B                                | 1,28 |
| nuclear pore complex interacting protein family, member B15                                                                                                                                                                                                                                                                  | NPIP15                                | 1,28 |
| endoplasmic reticulum to nucleus signaling 2                                                                                                                                                                                                                                                                                 | ERN2                                  | 1,28 |
| eukaryotic translation initiation factor 3, subunit H                                                                                                                                                                                                                                                                        | EIF3H                                 | 1,28 |
| structural maintenance of chromosomes 2                                                                                                                                                                                                                                                                                      | SMC2                                  | 1,28 |

|                                                                                               |              |      |
|-----------------------------------------------------------------------------------------------|--------------|------|
| ribosomal modification protein rimK-like family member B                                      | RIMKLB       | 1,28 |
| thrombospondin type 1 domain containing 7A                                                    | THSD7A       | 1,28 |
| MYC associated factor X                                                                       | MAX          | 1,28 |
| Jeck2013 ANTISENSE, CDS, coding, INTERNAL, intronic, OVCODE, OVEXON best transcript NM_000089 | COL1A2       | 1,28 |
| immunoglobulin-like domain containing receptor 2                                              | ILDR2        | 1,28 |
| inhibin beta B                                                                                | INHBB        | 1,28 |
| SUMO/sentrin peptidase family member, NEDD8 specific                                          | SENPA8       | 1,28 |
| MAP7 domain containing 3                                                                      | MAP7D3       | 1,28 |
| Transcript Identified by AceView, Entrez Gene ID(s) 114794                                    | ELFN2        | 1,28 |
| ATP binding cassette subfamily A member 3                                                     | ABCA3        | 1,28 |
| HEAT repeat containing 1                                                                      | HEATR1       | 1,28 |
| ribosome biogenesis regulator homolog                                                         | RRS1         | 1,28 |
| adhesion G protein-coupled receptor G5                                                        | ADGRG5       | 1,28 |
| WNT1 inducible signaling pathway protein 3                                                    | WISP3        | 1,28 |
| ubiquinol-cytochrome c reductase complex assembly factor 2                                    | UQCC2        | 1,28 |
| general transcription factor IIA 2                                                            | GTF2A2       | 1,28 |
| mast cell-expressed membrane protein 1                                                        | MCEMP1       | 1,28 |
| serpin peptidase inhibitor, clade B (ovalbumin), member 10                                    | SERPINB10    | 1,28 |
| BCL2-associated athanogene 5                                                                  | BAG5         | 1,28 |
| olfactory receptor, family 10, subfamily V, member 1                                          | OR10V1       | 1,28 |
| Rho guanine nucleotide exchange factor 1                                                      | ARHGEF1      | 1,28 |
| protein kinase D2                                                                             | PRKD2        | 1,28 |
| proteasome 26S subunit, non-ATPase 1                                                          | PSMD1        | 1,28 |
| transmembrane protein 120B                                                                    | TMEM120B     | 1,28 |
| TRIM39-RPP21 readthrough                                                                      | TRIM39-RPP21 | 1,28 |
| UPF2 regulator of nonsense transcripts homolog (yeast)                                        | UPF2         | 1,28 |
| transmembrane protein 158 (gene/pseudogene)                                                   | TMEM158      | 1,28 |
| submaxillary gland androgen regulated protein 3A                                              | SMR3A        | 1,28 |
| coiled-coil domain containing 73                                                              | CCDC73       | 1,28 |
| troponin T type 3 (skeletal, fast)                                                            | TNNT3        | 1,28 |
| proteasome activator subunit 3                                                                | PSME3        | 1,28 |
| sialic acid binding Ig-like lectin 15                                                         | SIGLEC15     | 1,28 |
| zinc finger, DHHC-type containing 12                                                          | ZDHHC12      | 1,27 |
| choroideremia (Rab escort protein 1)                                                          | CHM          | 1,27 |
| carboxypeptidase M                                                                            | CPM          | 1,27 |
| family with sequence similarity 129, member B                                                 | FAM129B      | 1,27 |
| protease, serine 38                                                                           | PRSS38       | 1,27 |
| NudC domain containing 1                                                                      | NUDCD1       | 1,27 |

|                                                                                                      |                    |      |
|------------------------------------------------------------------------------------------------------|--------------------|------|
| general transcription factor IIH subunit 2; general transcription factor IIH subunit 2B (pseudogene) | GTF2H2;<br>GTF2H2B | 1,27 |
| ZFP62 zinc finger protein                                                                            | ZFP62              | 1,27 |
| splicing factor 3a subunit 2                                                                         | SF3A2              | 1,27 |
| BMX non-receptor tyrosine kinase                                                                     | BMX                | 1,27 |
| collagen beta(1-O)galactosyltransferase 2                                                            | COLGALT2           | 1,27 |
| X-ray repair complementing defective repair in Chinese hamster cells 3                               | XRCC3              | 1,27 |
| ring finger protein 2                                                                                | RNF2               | 1,27 |
| family with sequence similarity 122A                                                                 | FAM122A            | 1,27 |
| flavin containing monooxygenase 1                                                                    | FMO1               | 1,27 |
| glycosylphosphatidylinositol anchor attachment 1                                                     | GPAA1              | 1,27 |
| keratin 34, type I                                                                                   | KRT34              | 1,27 |
| peroxisomal biogenesis factor 1                                                                      | PEX1               | 1,27 |
| chemokine (C-C motif) ligand 1                                                                       | CCL1               | 1,27 |
| protein phosphatase 1, regulatory subunit 3B                                                         | PPP1R3B            | 1,27 |
| histatin 1                                                                                           | HTN1               | 1,27 |
| polo-like kinase 4                                                                                   | PLK4               | 1,27 |
| kinesin family member 9                                                                              | KIF9               | 1,27 |
| cytochrome P450, family 2, subfamily D, polypeptide 6                                                | CYP2D6             | 1,27 |
| caudal type homeobox 1                                                                               | CDX1               | 1,27 |
| complexin 3                                                                                          | CPLX3              | 1,27 |
| tetratricopeptide repeat, ankyrin repeat and coiled-coil containing 1                                | TANC1              | 1,27 |
| myeloid-associated differentiation marker                                                            | MYADM              | 1,27 |
| sacsin molecular chaperone                                                                           | SACS               | 1,27 |
| bolA family member 1                                                                                 | BOLA1              | 1,27 |
| dual specificity tyrosine-(Y)-phosphorylation regulated kinase 1A                                    | DYRK1A             | 1,27 |
| E2F transcription factor 6                                                                           | E2F6               | 1,27 |
| Jeck2013 ANTISENSE, CDS, coding, INTERNAL, intronic, OVCODE, OVEXON best transcript NM_012242        | DKK1               | 1,27 |
| stomatin (EPB72)-like 1                                                                              | STOML1             | 1,27 |
| glutathione reductase                                                                                | GSR                | 1,27 |
| beta-1,3-glucuronyltransferase 1                                                                     | B3GAT1             | 1,27 |
| T brachyury transcription factor                                                                     | T                  | 1,27 |
| DnaJ (Hsp40) homolog, subfamily B, member 12                                                         | DNAJB12            | 1,27 |
| zinc finger protein 345                                                                              | ZNF345             | 1,27 |
| ADP-ribosyltransferase 1                                                                             | ART1               | 1,27 |
| ERI1 exoribonuclease family member 2                                                                 | ERI2               | 1,27 |
| PQ loop repeat containing 2-like                                                                     | PQLC2L             | 1,27 |
| gamma-glutamyltransferase 2                                                                          | GGT2               | 1,27 |
| ADP-ribosylation factor like GTPase 2 binding protein                                                | ARL2BP             | 1,27 |
| chromosome 9 open reading frame 84                                                                   | C9orf84            | 1,27 |

|                                                                                                                                                        |                    |      |
|--------------------------------------------------------------------------------------------------------------------------------------------------------|--------------------|------|
| apolipoprotein B mRNA editing enzyme, catalytic polypeptide-like 3H                                                                                    | APOBEC3H           | 1,27 |
| interferon, alpha-inducible protein 27-like 1                                                                                                          | IFI27L1            | 1,27 |
| heparan sulfate (glucosamine) 3-O-sulfotransferase 4                                                                                                   | HS3ST4             | 1,27 |
| neugrin, neurite outgrowth associated; tubulin tyrosine ligase-like family member 13, pseudogene                                                       | NGRN; TTLL13P      | 1,27 |
| MDM2 proto-oncogene, E3 ubiquitin protein ligase                                                                                                       | MDM2               | 1,27 |
| GRB2-binding adaptor protein, transmembrane                                                                                                            | GAPT               | 1,27 |
| discs, large (Drosophila) homolog-associated protein 2                                                                                                 | DLGAP2             | 1,27 |
| actin, alpha 1, skeletal muscle                                                                                                                        | ACTA1              | 1,27 |
| bromodomain containing 4                                                                                                                               | BRD4               | 1,27 |
| family with sequence similarity 153, member B                                                                                                          | FAM153B            | 1,27 |
| benzodiazepine receptor (peripheral) associated protein 1                                                                                              | BZRAP1             | 1,27 |
| selenoprotein V; selenoprotein V<br>[Source:EntrezGene;Acc:348303]; Transcript Identified by AceView, Entrez Gene ID(s) 348303, RefSeq ID(s) NM_182704 | SELV               | 1,27 |
| uroporphyrinogen decarboxylase                                                                                                                         | UROD               | 1,27 |
| poly(ADP-ribose) polymerase family member 11                                                                                                           | PARP11             | 1,27 |
| Rho GTPase activating protein 23                                                                                                                       | ARHGAP23           | 1,27 |
| polyamine oxidase (exo-N4-amino)                                                                                                                       | PAOX               | 1,27 |
| mitochondrial ribosomal protein S21                                                                                                                    | MRPS21             | 1,27 |
| RNA binding motif protein 27                                                                                                                           | RBM27              | 1,27 |
| Memczak2013 ANTISENSE, coding, INTERNAL, intronic best transcript NM_001195144                                                                         | ANKRD44            | 1,27 |
| piwi-like RNA-mediated gene silencing 4                                                                                                                | PIWIL4             | 1,27 |
| de-etiolated homolog 1 (Arabidopsis)                                                                                                                   | DET1               | 1,27 |
| zinc finger homeobox 2                                                                                                                                 | ZFXH2              | 1,27 |
| olfactory receptor, family 8, subfamily K, member 3 (gene/pseudogene)                                                                                  | OR8K3              | 1,27 |
| chromosome 1 open reading frame 27                                                                                                                     | C1orf27            | 1,27 |
| Transcript Identified by AceView, Entrez Gene ID(s) 49855                                                                                              | SCAPER             | 1,27 |
| 5-nucleotidase, cytosolic II                                                                                                                           | NT5C2              | 1,27 |
| translocase of inner mitochondrial membrane 23 homolog (yeast)                                                                                         | TIMM23             | 1,27 |
| G-protein signaling modulator 1                                                                                                                        | GPSM1              | 1,27 |
| tRNA methyltransferase 12 homolog (S. cerevisiae)                                                                                                      | TRMT12             | 1,27 |
| Sec23 homolog B, COPII coat complex component                                                                                                          | SEC23B             | 1,27 |
| protein phosphatase 1, regulatory subunit 17                                                                                                           | PPP1R17            | 1,27 |
| sema domain, immunoglobulin domain (Ig), short basic domain, secreted, (semaphorin) 3B; microRNA 6872                                                  | SEMA3B;<br>MIR6872 | 1,27 |
| FK506 binding protein 4                                                                                                                                | FKBP4              | 1,27 |
| contactin 1                                                                                                                                            | CNTN1              | 1,27 |

|                                                                                         |             |      |
|-----------------------------------------------------------------------------------------|-------------|------|
| Memczak2013 ANTISENSE, CDS, coding, INTERNAL best transcript NM_001020819               | MYADM       | 1,27 |
| lysine (K)-specific demethylase 2A                                                      | KDM2A       | 1,27 |
| interferon regulatory factor 3                                                          | IRF3        | 1,27 |
| synovial sarcoma, X breakpoint 6 (pseudogene)                                           | SSX6        | 1,27 |
| OTU deubiquitinase 4                                                                    | OTUD4       | 1,27 |
| Zhang2013 ALT_ACCEPTOR, ALT_DONOR, coding, INTERNAL, intronic best transcript NM_002473 | MYH9        | 1,27 |
| family with sequence similarity 179, member B                                           | FAM179B     | 1,27 |
| yippee like 4                                                                           | YPEL4       | 1,27 |
| phosphatidylinositol 4-kinase, catalytic, beta                                          | PI4KB       | 1,27 |
| family with sequence similarity 221, member A                                           | FAM221A     | 1,27 |
| TBC1 domain family, member 27                                                           | TBC1D27     | 1,27 |
| gamma-glutamyltransferase light chain 2                                                 | GGTLC2      | 1,27 |
| thioredoxin-like 1                                                                      | TXNL1       | 1,27 |
| keratin 18 pseudogene 55                                                                | KRT18P55    | 1,27 |
| prion protein 2 (dublet)                                                                | PRND        | 1,27 |
| protein interacting with PRKCA 1                                                        | PICK1       | 1,27 |
| semenogelin I                                                                           | SEMG1       | 1,27 |
| protection of telomeres 1                                                               | POT1        | 1,27 |
| cholinergic receptor, nicotinic delta                                                   | CHRND       | 1,27 |
| keratin associated protein 10-1                                                         | KRTAP10-1   | 1,27 |
| leucine rich repeat containing 46                                                       | LRRC46      | 1,27 |
| sideroflexin 3                                                                          | SFXN3       | 1,27 |
| LSM1 homolog, mRNA degradation associated                                               | LSM1        | 1,27 |
| peptidylprolyl isomerase F                                                              | PPIF        | 1,27 |
| V-set and transmembrane domain containing 4                                             | VSTM4       | 1,27 |
| tubulin, gamma complex associated protein 6                                             | TUBGCP6     | 1,27 |
| tumor necrosis factor, alpha-induced protein 1 (endothelial)                            | TNFAIP1     | 1,27 |
| chromosome 3 open reading frame 67                                                      | C3orf67     | 1,26 |
| Memczak2013 ANTISENSE, coding, INTERNAL, intronic best transcript NM_001001660          | LYRM5       | 1,26 |
| Rho GTPase activating protein 17                                                        | ARHGAP17    | 1,26 |
| ankyrin repeat domain 44                                                                | ANKRD44     | 1,26 |
| family with sequence similarity 71, member E1                                           | FAM71E1     | 1,26 |
| membrane-spanning 4-domains, subfamily A, member 10                                     | MS4A10      | 1,26 |
| unc-51 like autophagy activating kinase 1                                               | ULK1        | 1,26 |
| envoplakin                                                                              | EVPL        | 1,26 |
| diphthamide biosynthesis 1; ovarian tumor suppressor candidate 2                        | DPH1; OVCA2 | 1,26 |
| zinc finger protein 587                                                                 | ZNF587      | 1,26 |
| hedgehog acyltransferase                                                                | HHAT        | 1,26 |



|                                                                                                    |                          |      |
|----------------------------------------------------------------------------------------------------|--------------------------|------|
| eukaryotic translation initiation factor 2B, subunit 3<br>gamma, 58kDa                             | EIF2B3                   | 1,26 |
| chromosome 19 open reading frame 81                                                                | C19orf81                 | 1,26 |
| tyrosine 3-monooxygenase/tryptophan 5-monooxygenase<br>activation protein, theta                   | YWHAQ                    | 1,26 |
| integrator complex subunit 7                                                                       | INTS7                    | 1,26 |
| cytidine monophosphate N-acetylneuraminic acid<br>synthetase                                       | CMAS                     | 1,26 |
| cholinergic receptor, nicotinic alpha 3                                                            | CHRNA3                   | 1,26 |
| STIP1 homology and U-box containing protein 1, E3<br>ubiquitin protein ligase                      | STUB1                    | 1,26 |
| transcription elongation factor B (SIII), polypeptide 3<br>(110kDa, elongin A)                     | TCEB3                    | 1,26 |
| adaptor-related protein complex 1, sigma 2 subunit<br>pseudogene                                   | LOC653653;<br>AC025048.1 | 1,26 |
| C-type lectin domain family 1, member A                                                            | CLEC1A                   | 1,26 |
| surfeit 2 [Source:HGNC Symbol;Acc:HGNC:11475]                                                      | SURF2                    | 1,26 |
| olfactory receptor, family 51, subfamily G, member 1<br>(gene/pseudogene)                          | OR51G1                   | 1,26 |
| glycoprotein (transmembrane) nmb                                                                   | GPNMB                    | 1,26 |
| TAF6 RNA polymerase II, TATA box binding protein (TBP)-<br>associated factor, 80kDa                | TAF6                     | 1,26 |
| chromodomain helicase DNA binding protein 1                                                        | CHD1                     | 1,26 |
| V-set and transmembrane domain containing 2 like                                                   | VSTM2L                   | 1,26 |
| mitochondria localized glutamic acid rich protein                                                  | MGARP                    | 1,26 |
| polymerase (RNA) II (DNA directed) polypeptide J,<br>13.3kDa                                       | POLR2J                   | 1,26 |
| ribonucleic acid export 1                                                                          | RAE1                     | 1,26 |
| Transcript Identified by AceView, Entrez Gene ID(s) 5783                                           | PTPN13                   | 1,26 |
| cytokine inducible SH2-containing protein                                                          | CISH                     | 1,26 |
| neural precursor cell expressed, developmentally down-<br>regulated 4, E3 ubiquitin protein ligase | NEDD4                    | 1,26 |
| G-patch domain and ankyrin repeats 1                                                               | GPANK1                   | 1,26 |
| WD repeat domain 76                                                                                | WDR76                    | 1,26 |
| WD repeat domain 25                                                                                | WDR25                    | 1,26 |
| polymerase (DNA directed), theta                                                                   | POLQ                     | 1,26 |
| single-minded family bHLH transcription factor 1                                                   | SIM1                     | 1,26 |
| zinc finger protein 319                                                                            | ZNF319                   | 1,26 |
| tandem C2 domains, nuclear                                                                         | TC2N                     | 1,26 |
| deiodinase, iodothyronine, type II                                                                 | DIO2                     | 1,26 |
| RAB5B, member RAS oncogene family                                                                  | RAB5B                    | 1,26 |
| BBSome interacting protein 1                                                                       | BBIP1                    | 1,26 |
| spondin 1, extracellular matrix protein                                                            | SPON1                    | 1,26 |
| vacuole membrane protein 1; microRNA 21                                                            | VMP1; MIR21              | 1,26 |

|                                                                                                                                                                                                  |                        |      |
|--------------------------------------------------------------------------------------------------------------------------------------------------------------------------------------------------|------------------------|------|
| LDL receptor related protein 1B                                                                                                                                                                  | LRP1B                  | 1,26 |
| GSG1-like                                                                                                                                                                                        | GSG1L                  | 1,26 |
| MT-RNR2-like 2; MT-RNR2-like 12                                                                                                                                                                  | MTRNR2L2;<br>MTRNR2L12 | 1,26 |
| serine incorporator 5                                                                                                                                                                            | SERINC5                | 1,26 |
| family with sequence similarity 86, member C1                                                                                                                                                    | FAM86C1                | 1,26 |
| mitochondrial transcription termination factor 1                                                                                                                                                 | MTERF1                 | 1,26 |
| transmembrane protein 132A                                                                                                                                                                       | TMEM132A               | 1,26 |
| ubiquitin domain containing 1                                                                                                                                                                    | UBTD1                  | 1,26 |
| zinc finger, matrin-type 2                                                                                                                                                                       | ZMAT2                  | 1,26 |
| centromere protein J                                                                                                                                                                             | CENPJ                  | 1,26 |
| tripartite motif containing 68                                                                                                                                                                   | TRIM68                 | 1,26 |
| olfactory receptor, family 13, subfamily C, member 3                                                                                                                                             | OR13C3                 | 1,26 |
| pleckstrin homology-like domain, family A, member 1                                                                                                                                              | PHLDA1                 | 1,26 |
| RAP1B, member of RAS oncogene family                                                                                                                                                             | RAP1B                  | 1,26 |
| small nuclear ribonucleoprotein, U4/U6.U5 27kDa subunit                                                                                                                                          | SNRNP27                | 1,26 |
| uncharacterized LOC100130449; novel transcript, antisense to GPC1; Transcript Identified by AceView, Entrez Gene ID(s) 100130449; uncharacterized LOC100130449 [Source:EntrezGene;Acc:100130449] | PP14571;<br>AC110619.2 | 1,26 |
| Transcript Identified by AceView, Entrez Gene ID(s) 6579                                                                                                                                         | SLCO1A2                | 1,26 |
| toll-interleukin 1 receptor (TIR) domain containing adaptor protein                                                                                                                              | TIRAP                  | 1,26 |
| SCL/TAL1 interrupting locus                                                                                                                                                                      | STIL                   | 1,26 |
| peptidylprolyl isomerase A (cyclophilin A)-like 4A                                                                                                                                               | PPIAL4A                | 1,26 |
| Memczak2013 ANTISENSE, coding, INTERNAL, UTR3 best transcript NM_016815                                                                                                                          | GYPC                   | 1,26 |
| PRAME family member 5                                                                                                                                                                            | PRAMEF5                | 1,26 |
| leucine rich repeat containing 66                                                                                                                                                                | LRRC66                 | 1,26 |
| galanin receptor 2                                                                                                                                                                               | GALR2                  | 1,26 |
| centrosomal protein 70kDa                                                                                                                                                                        | CEP70                  | 1,26 |
| dystrophin related protein 2                                                                                                                                                                     | DRP2                   | 1,26 |
| mediator complex subunit 11                                                                                                                                                                      | MED11                  | 1,26 |
| thymidine kinase 1, soluble                                                                                                                                                                      | TK1                    | 1,26 |
| phosphatase domain containing, paladin 1                                                                                                                                                         | PALD1                  | 1,26 |
| v-maf avian musculoaponeurotic fibrosarcoma oncogene homolog B                                                                                                                                   | MAFB                   | 1,26 |
| prolyl 3-hydroxylase 2                                                                                                                                                                           | P3H2                   | 1,26 |
| trafficking protein particle complex 10                                                                                                                                                          | TRAPPC10               | 1,26 |
| arylsulfatase F                                                                                                                                                                                  | ARSF                   | 1,26 |
| vacuolar protein sorting 28 homolog (S. cerevisiae)                                                                                                                                              | VPS28                  | 1,26 |
| cathepsin G                                                                                                                                                                                      | CTSG                   | 1,26 |
| olfactory receptor, family 52, subfamily N, member 2                                                                                                                                             | OR52N2                 | 1,26 |

|                                                                             |               |      |
|-----------------------------------------------------------------------------|---------------|------|
| transcriptional adaptor 2A                                                  | TADA2A        | 1,26 |
| mucin 21, cell surface associated                                           | MUC21         | 1,26 |
| gastrulation brain homeobox 2                                               | GBX2          | 1,26 |
| pleckstrin homology domain containing, family F (with FYVE domain) member 2 | PLEKHF2       | 1,26 |
| protein phosphatase 3, catalytic subunit, alpha isozyme                     | PPP3CA        | 1,26 |
| prefoldin subunit 4                                                         | PFDN4         | 1,26 |
| leiomodulin 2 (cardiac)                                                     | LMOD2         | 1,26 |
| MAGE family member C3                                                       | MAGEC3        | 1,26 |
| phosphodiesterase 7B                                                        | PDE7B         | 1,26 |
| protein kinase, cAMP-dependent, regulatory, type I, beta                    | PRKAR1B       | 1,26 |
| coiled-coil domain containing 58                                            | CCDC58        | 1,26 |
| olfactory receptor, family 8, subfamily D, member 2 (gene/pseudogene)       | OR8D2         | 1,26 |
| syncoilin, intermediate filament protein                                    | SYNC          | 1,26 |
| suppression of tumorigenicity 5                                             | ST5           | 1,26 |
| tryptase alpha/beta 1; tryptase beta 2 (gene/pseudogene)                    | TPSAB1; TPSB2 | 1,26 |
| osteomodulin                                                                | OMD           | 1,26 |
| chemokine (C-C motif) receptor 5 (gene/pseudogene)                          | CCR5          | 1,26 |
| mitochondrial ribosomal protein S2                                          | MRPS2         | 1,26 |
| nucleoporin 35kDa                                                           | NUP35         | 1,26 |
| maternal embryonic leucine zipper kinase                                    | MELK          | 1,26 |
| POU class 4 homeobox 1                                                      | POU4F1        | 1,26 |
| LY6/PLAUR domain containing 5                                               | LYPD5         | 1,26 |
| glial cells missing homolog 2 (Drosophila)                                  | GCM2          | 1,26 |
| lipocalin 8                                                                 | LCN8          | 1,26 |
| one cut homeobox 3                                                          | ONECUT3       | 1,26 |
| olfactory receptor, family 52, subfamily E, member 4                        | OR52E4        | 1,26 |
| AKT interacting protein                                                     | AKTIP         | 1,26 |
| cyclin-dependent kinase-like 3                                              | CDKL3         | 1,26 |
| ankyrin repeat domain 29                                                    | ANKRD29       | 1,26 |
| T-box 1                                                                     | TBX1          | 1,26 |
| coiled-coil domain containing 90B                                           | CCDC90B       | 1,26 |
| amyloid beta (A4) precursor-like protein 2                                  | APLP2         | 1,26 |
| cysteine-serine-rich nuclear protein 1                                      | CSRNP1        | 1,26 |
| charged multivesicular body protein 7                                       | CHMP7         | 1,26 |
| SLAM family member 9                                                        | SLAMF9        | 1,26 |
| methyltransferase like 8                                                    | METTL8        | 1,26 |
| serine threonine kinase 39                                                  | STK39         | 1,26 |
| protein tyrosine phosphatase, receptor type, C                              | PTPRC         | 1,26 |
| torsin family 4, member A                                                   | TOR4A         | 1,26 |
| collagen, type IX, alpha 1                                                  | COL9A1        | 1,26 |
| ClpB homolog, mitochondrial AAA ATPase chaperonin                           | CLPB          | 1,26 |

|                                                                                        |                |      |
|----------------------------------------------------------------------------------------|----------------|------|
| sodium channel, non voltage gated 1 alpha subunit                                      | SCNN1A         | 1,26 |
| calcium/calmodulin-dependent protein kinase II delta                                   | CAMK2D         | 1,26 |
| pleckstrin homology domain containing, family G (with RhoGef domain) member 4B         | PLEKHG4B       | 1,26 |
| KIAA1324-like                                                                          | KIAA1324L      | 1,26 |
| Jeck2013 ALT_ACCEPTOR, ALT_DONOR, coding, INTERNAL, intronic best transcript NM_133509 | RAD51B         | 1,25 |
| C20orf166 antisense RNA 1                                                              | C20orf166-AS1  | 1,25 |
| actin related protein 2/3 complex subunit 3                                            | ARPC3          | 1,25 |
| syntaxin 4                                                                             | STX4           | 1,25 |
| sorting nexin 2                                                                        | SNX2           | 1,25 |
| oxysterol binding protein-like 2                                                       | OSBPL2         | 1,25 |
| paraneoplastic Ma antigen family member 5                                              | PNMA5          | 1,25 |
| rhomboid domain containing 3                                                           | RHBDD3         | 1,25 |
| glycine receptor alpha 3                                                               | GLRA3          | 1,25 |
| UFM1-specific peptidase 2                                                              | UFSP2          | 1,25 |
| pyruvate kinase, muscle                                                                | PKM            | 1,25 |
| LIM homeobox transcription factor 1, beta                                              | LMX1B          | 1,25 |
| anoctamin 9                                                                            | ANO9           | 1,25 |
| nuclear pore complex interacting protein family, member B3                             | NPIP3          | 1,25 |
| chromosome 9 open reading frame 47; sphingosine-1-phosphate receptor 3                 | C9orf47; S1PR3 | 1,25 |
| gastrokin 1                                                                            | GKN1           | 1,25 |
| solute carrier family 7 (amino acid transporter light chain, y+L system), member 6     | SLC7A6         | 1,25 |
| exonuclease 3-5 domain containing 2                                                    | EXD2           | 1,25 |
| lymphocyte-activation gene 3                                                           | LAG3           | 1,25 |
| paired box 4                                                                           | PAX4           | 1,25 |
| transmembrane and ubiquitin-like domain containing 2                                   | TMUB2          | 1,25 |
| armadillo repeat gene deleted in velocardiofacial syndrome                             | ARVCF          | 1,25 |
| katanin p60 (ATPase containing) subunit A 1                                            | KATNA1         | 1,25 |
| Purkinje cell protein 4 like 1                                                         | PCP4L1         | 1,25 |
| microfibrillar associated protein 5                                                    | MFAP5          | 1,25 |
| RCAN family member 3                                                                   | RCAN3          | 1,25 |
| galanin receptor 3                                                                     | GALR3          | 1,25 |
| neuroblastoma breakpoint family, member 1                                              | NBPF1          | 1,25 |
| NADH dehydrogenase (ubiquinone) 1 beta subcomplex, 2, 8kDa                             | NDUFB2         | 1,25 |
| Memczak2013 ANTISENSE, coding, INTERNAL, intronic best transcript NM_014754            | PTDSS1         | 1,25 |
| 5-phosphohydroxy-L-lysine phospho-lyase                                                | PHYKPL         | 1,25 |
| fms-related tyrosine kinase 4                                                          | FLT4           | 1,25 |
| zinc finger protein 384                                                                | ZNF384         | 1,25 |

|                                                                         |                   |      |
|-------------------------------------------------------------------------|-------------------|------|
| FERM and PDZ domain containing 4                                        | FRMPD4            | 1,25 |
| Ras association (RalGDS/AF-6) domain family member 3                    | RASSF3            | 1,25 |
| NFAT activating protein with ITAM motif 1                               | NFAM1             | 1,25 |
| MDM2 binding protein                                                    | MTBP              | 1,25 |
| tweety family member 2                                                  | TTYH2             | 1,25 |
| cysteinyl leukotriene receptor 2                                        | CYSLTR2           | 1,25 |
| piggyBac transposable element derived 1                                 | PGBD1             | 1,25 |
| WW domain binding protein 5                                             | WBP5              | 1,25 |
| polypeptide N-acetylgalactosaminyltransferase 6                         | GALNT6            | 1,25 |
| mitochondrial fission factor                                            | MFF               | 1,25 |
| splicing factor 3b subunit 2                                            | SF3B2             | 1,25 |
| radical S-adenosyl methionine domain containing 2                       | RSAD2             | 1,25 |
| eukaryotic translation initiation factor 6                              | EIF6              | 1,25 |
| nuclear receptor subfamily 1, group H, member 2                         | NR1H2             | 1,25 |
| Transcript Identified by AceView, Entrez Gene ID(s) 9215                | LARGE             | 1,25 |
| tRNA methyltransferase 11-2 homolog ( <i>S. cerevisiae</i> )            | TRMT112           | 1,25 |
| ataxin 2-like                                                           | ATXN2L            | 1,25 |
| sphingomyelin synthase 2                                                | SGMS2             | 1,25 |
| prolyl 4-hydroxylase, alpha polypeptide III                             | P4HA3             | 1,25 |
| proteasomal ATPase-associated factor 1                                  | PAAF1             | 1,25 |
| zinc finger protein 732                                                 | ZNF732            | 1,25 |
| vacuolar protein sorting 52 homolog ( <i>S. cerevisiae</i> )            | VPS52             | 1,25 |
| RAB interacting factor                                                  | RABIF             | 1,25 |
| ankyrin repeat and SOCS box containing 14                               | ASB14             | 1,25 |
| PRAME family member 4                                                   | PRAMEF4           | 1,25 |
| POU class 2 homeobox 3                                                  | POU2F3            | 1,25 |
| RFX family member 8, lacking RFX DNA binding domain                     | RFX8              | 1,25 |
| cell cycle progression 1; microRNA 628                                  | CCPG1; MIR628     | 1,25 |
| tripartite motif containing 42                                          | TRIM42            | 1,25 |
| ectonucleoside triphosphate diphosphohydrolase 8                        | ENTPD8            | 1,25 |
| glutathione S-transferase omega 2                                       | GSTO2             | 1,25 |
| chromosome X open reading frame 49B; chromosome X open reading frame 49 | CXorf49B; CXorf49 | 1,25 |
| chromosome 9 open reading frame 129                                     | C9orf129          | 1,25 |
| DEAH (Asp-Glu-Ala-His) box polypeptide 32                               | DHX32             | 1,25 |
| Transcript Identified by AceView, Entrez Gene ID(s) 65249               | ZSWIM4            | 1,25 |
| ribosomal protein S6 kinase, 90kDa, polypeptide 1                       | RPS6KA1           | 1,25 |
| pellino E3 ubiquitin protein ligase family member 2                     | PELI2             | 1,25 |
| testis-specific serine kinase substrate                                 | TSKS              | 1,25 |
| protein phosphatase 2, regulatory subunit B, beta                       | PPP2R2B           | 1,25 |
| purinergic receptor P2X, ligand gated ion channel, 4                    | P2RX4             | 1,25 |
| RNA binding motif protein 4                                             | RBM4              | 1,25 |

|                                                                                                                      |                               |      |
|----------------------------------------------------------------------------------------------------------------------|-------------------------------|------|
| paired box 1                                                                                                         | PAX1                          | 1,25 |
| glycosyltransferase 8 domain containing 2                                                                            | GLT8D2                        | 1,25 |
| phosphatidylinositol-4-phosphate 5-kinase, type I, alpha                                                             | PIP5K1A                       | 1,25 |
| transcription factor AP-2 epsilon (activating enhancer binding protein 2 epsilon)                                    | TFAP2E                        | 1,25 |
| BarH-like homeobox 2                                                                                                 | BARHL2                        | 1,25 |
| ATPase, Ca++ transporting, ubiquitous                                                                                | ATP2A3                        | 1,25 |
| Memczak2013 ANTISENSE, CDS, coding, INTERNAL best transcript NM_004145                                               | MYO9B                         | 1,25 |
| chromosome 3 open reading frame 56                                                                                   | C3orf56                       | 1,25 |
| ladybird homeobox 2                                                                                                  | LBX2                          | 1,25 |
| galactose-3-O-sulfotransferase 3                                                                                     | GAL3ST3                       | 1,25 |
| KIAA1107                                                                                                             | KIAA1107                      | 1,25 |
| ring finger protein 111                                                                                              | RNF111                        | 1,25 |
| myeloid/lymphoid or mixed-lineage leukemia; translocated to, 1                                                       | MLLT1                         | 1,25 |
| DNA meiotic recombinase 1                                                                                            | DMC1                          | 1,25 |
| diacylglycerol kinase, delta 130kDa                                                                                  | DGKD                          | 1,25 |
| Eukaryotic translation initiation factor 3 subunit F [Source:UniProtKB/Swiss-Prot;Acc:O00303]                        | EIF3F                         | 1,25 |
| ubiquitin-conjugating enzyme E2Q family member 1                                                                     | UBE2Q1                        | 1,25 |
| spinster homolog 3 (Drosophila)                                                                                      | SPNS3                         | 1,25 |
| coiled-coil domain containing 53                                                                                     | CCDC53                        | 1,25 |
| ankyrin repeat and BTB (POZ) domain containing 1                                                                     | ABTB1                         | 1,25 |
| sialidase 1 (lysosomal sialidase)                                                                                    | NEU1                          | 1,25 |
| S-antigen; retina and pineal gland (arrestin)                                                                        | SAG                           | 1,25 |
| glycerol-3-phosphate acyltransferase 2, mitochondrial                                                                | GPAT2                         | 1,25 |
| calcium channel, voltage-dependent, gamma subunit 5                                                                  | CACNG5                        | 1,25 |
| zinc finger protein 777                                                                                              | ZNF777                        | 1,25 |
| F-box protein 10                                                                                                     | FBXO10                        | 1,25 |
| pyruvate dehydrogenase kinase, isozyme 4                                                                             | PDK4                          | 1,25 |
| Transcript Identified by AceView, Entrez Gene ID(s) 93190                                                            | C1orf158                      | 1,25 |
| retrotransposon-like 1                                                                                               | RTL1                          | 1,25 |
| jumonji domain containing 7; phospholipase A2, group IVB (cytosolic); JMJD7-PLA2G4B readthrough                      | JMJD7; PLA2G4B; JMJD7-PLA2G4B | 1,25 |
| timeless circadian clock                                                                                             | TIMELESS                      | 1,25 |
| lectin, galactoside-binding, soluble, 14                                                                             | LGALS14                       | 1,25 |
| Rho GTPase activating protein 4                                                                                      | ARHGAP4                       | 1,25 |
| pre-mRNA processing factor 18                                                                                        | PRPF18                        | 1,25 |
| cytochrome P450, family 2, subfamily D, polypeptide 6                                                                | CYP2D6                        | 1,25 |
| chromosome 3 open reading frame 38                                                                                   | C3orf38                       | 1,25 |
| Memczak2013 ANTISENSE, coding, INTERNAL, intronic best transcript NM_001020819; novel transcript, antisense to MYADM | AC008753.6; MYADM             | 1,25 |

|                                                                                                                                                                                                                                             |                                                     |      |
|---------------------------------------------------------------------------------------------------------------------------------------------------------------------------------------------------------------------------------------------|-----------------------------------------------------|------|
| mitochondrial ribosome recycling factor                                                                                                                                                                                                     | MRRF                                                | 1,25 |
| differentially expressed in FDCP 8 homolog (mouse)                                                                                                                                                                                          | DEF8                                                | 1,25 |
| zinc finger protein 836                                                                                                                                                                                                                     | ZNF836                                              | 1,25 |
| copine II                                                                                                                                                                                                                                   | CPNE2                                               | 1,25 |
| IQ motif containing F3                                                                                                                                                                                                                      | IQCF3                                               | 1,25 |
| RAS p21 protein activator 3                                                                                                                                                                                                                 | RASA3                                               | 1,25 |
| transketolase-like 1                                                                                                                                                                                                                        | TKTL1                                               | 1,25 |
| transmembrane protein 17                                                                                                                                                                                                                    | TMEM17                                              | 1,25 |
| membrane-spanning 4-domains, subfamily A, member 6A                                                                                                                                                                                         | MS4A6A                                              | 1,25 |
| coiled-coil domain containing 114                                                                                                                                                                                                           | CCDC114                                             | 1,24 |
| DEAH (Asp-Glu-Ala-His) box polypeptide 38                                                                                                                                                                                                   | DHX38                                               | 1,24 |
| endothelial PAS domain protein 1                                                                                                                                                                                                            | EPAS1                                               | 1,24 |
| myeloid leukemia factor 2                                                                                                                                                                                                                   | MLF2                                                | 1,24 |
| ChaC, cation transport regulator homolog 2 (E. coli)                                                                                                                                                                                        | CHAC2                                               | 1,24 |
| WD repeat domain 34                                                                                                                                                                                                                         | WDR34                                               | 1,24 |
| interferon regulatory factor 8                                                                                                                                                                                                              | IRF8                                                | 1,24 |
| follicular dendritic cell secreted protein                                                                                                                                                                                                  | FDCSP                                               | 1,24 |
| MORN repeat containing 5                                                                                                                                                                                                                    | MORN5                                               | 1,24 |
| X-linked Kx blood group related 5                                                                                                                                                                                                           | XKR5                                                | 1,24 |
| nuclear pore complex interacting protein family, member B4                                                                                                                                                                                  | NPIP4                                               | 1,24 |
| NADH dehydrogenase (ubiquinone) complex I, assembly factor 3                                                                                                                                                                                | NDUFAF3                                             | 1,24 |
| olfactory receptor, family 9, subfamily A, member 2                                                                                                                                                                                         | OR9A2                                               | 1,24 |
| G protein-coupled receptor, class C, group 6, member A                                                                                                                                                                                      | GPRC6A                                              | 1,24 |
| spastic paraplegia 11 (autosomal recessive)                                                                                                                                                                                                 | SPG11                                               | 1,24 |
| ceroid-lipofuscinosis, neuronal 8                                                                                                                                                                                                           | CLN8                                                | 1,24 |
| T-cell lymphoma invasion and metastasis 2                                                                                                                                                                                                   | TIAM2                                               | 1,24 |
| zinc finger protein 835                                                                                                                                                                                                                     | ZNF835                                              | 1,24 |
| SLX1 homolog A, structure-specific endonuclease subunit; SLX1 homolog B, structure-specific endonuclease subunit; SLX1A-SULT1A3 readthrough (NMD candidate); SLX1B-SULT1A4 readthrough (NMD candidate); sulfotransferase family 1A member 3 | SLX1A; SLX1B; SLX1A-SULT1A3; SLX1B-SULT1A4; SULT1A3 | 1,24 |
| Transcript Identified by AceView, Entrez Gene ID(s) 7265                                                                                                                                                                                    | TTC1                                                | 1,24 |
| solute carrier family 15 (oligopeptide transporter), member 1                                                                                                                                                                               | SLC15A1                                             | 1,24 |
| zinc finger protein 626                                                                                                                                                                                                                     | ZNF626                                              | 1,24 |
| delta-like 1 (Drosophila)                                                                                                                                                                                                                   | DLL1                                                | 1,24 |
| secretory carrier membrane protein 4; adenosine deaminase, tRNA-specific 3                                                                                                                                                                  | SCAMP4; ADAT3                                       | 1,24 |
| microtubule associated serine/threonine kinase-like                                                                                                                                                                                         | MASTL                                               | 1,24 |
| solute carrier family 30 (zinc transporter), member 6                                                                                                                                                                                       | SLC30A6                                             | 1,24 |

|                                                                                         |                                |      |
|-----------------------------------------------------------------------------------------|--------------------------------|------|
| ADP-ribosylation factor 6                                                               | ARF6                           | 1,24 |
| ras homolog family member B                                                             | RHOB                           | 1,24 |
| DDHD domain containing 1                                                                | DDHD1                          | 1,24 |
| SH3-domain binding protein 5 (BTK-associated)                                           | SH3BP5                         | 1,24 |
| thimet oligopeptidase 1                                                                 | THOP1                          | 1,24 |
| RGP1 homolog, RAB6A GEF complex partner 1                                               | RGP1                           | 1,24 |
| protein tyrosine phosphatase, receptor type, R                                          | PTPRR                          | 1,24 |
| general transcription factor IIF subunit 2                                              | GTF2F2                         | 1,24 |
| GRAM domain containing 1B                                                               | GRAMD1B                        | 1,24 |
| immunoglobulin superfamily containing leucine-rich repeat                               | ISLR                           | 1,24 |
| uncharacterized LOC100131315; novel transcript                                          | LOC100131315;<br>RP11-758N13.1 | 1,24 |
| chromosome 2 open reading frame 69                                                      | C2orf69                        | 1,24 |
| zinc finger, DHHC-type containing 3                                                     | ZDHHC3                         | 1,24 |
| general transcription factor IIIA                                                       | GTF3A                          | 1,24 |
| ribosomal protein L10-like                                                              | RPL10L                         | 1,24 |
| solute carrier family 15 (oligopeptide transporter), member 3                           | SLC15A3                        | 1,24 |
| fermitin family member 1                                                                | FERMT1                         | 1,24 |
| transcription factor 4                                                                  | TCF4                           | 1,24 |
| ras-related C3 botulinum toxin substrate 1 (rho family, small GTP binding protein Rac1) | RAC1                           | 1,24 |
| trafficking protein particle complex 4                                                  | TRAPPC4                        | 1,24 |
| long intergenic non-protein coding RNA 1343                                             | LINC01343                      | 1,24 |
| transmembrane protein 52B                                                               | TMEM52B                        | 1,24 |
| involucrin                                                                              | IVL                            | 1,24 |
| membrane associated ring finger 4                                                       | MARCH4                         | 1,24 |
| Cdc42 guanine nucleotide exchange factor 9; ARHGEF9 intronic transcript 1               | ARHGEF9;<br>ARHGEF9-IT1        | 1,24 |
| claudin 8                                                                               | CLDN8                          | 1,24 |
| coiled-coil domain containing 84                                                        | CCDC84                         | 1,24 |
| phosphatidylinositol glycan anchor biosynthesis class C                                 | PIGC                           | 1,24 |
| Memczak2013 ANTISENSE, CDS, coding, INTERNAL best transcript NM_001080453               | INTS1                          | 1,24 |
| nuclear factor of activated T-cells, cytoplasmic, calcineurin-dependent 4               | NFATC4                         | 1,24 |
| ADP-ribosylhydrolase like 1                                                             | ADPRHL1                        | 1,24 |
| signal-regulatory protein gamma                                                         | SIRPG                          | 1,24 |
| caspase recruitment domain family, member 17                                            | CARD17                         | 1,24 |
| ATPase, Ca++ transporting, plasma membrane 4                                            | ATP2B4                         | 1,24 |
| transmembrane protein 237                                                               | TMEM237                        | 1,24 |
| DIS3 like 3-5 exoribonuclease 2                                                         | DIS3L2                         | 1,24 |
| HIG1 hypoxia inducible domain family, member 2B                                         | HIGD2B                         | 1,24 |
| peptidoglycan recognition protein 3                                                     | PGLYRP3                        | 1,24 |



|                                                                               |                            |      |
|-------------------------------------------------------------------------------|----------------------------|------|
| RNA (guanine-7-) methyltransferase                                            | RNMT                       | 1,24 |
| G protein regulated inducer of neurite outgrowth 2                            | GPRIN2                     | 1,24 |
| intestinal cell (MAK-like) kinase                                             | ICK                        | 1,24 |
| 5,3-nucleotidase, mitochondrial                                               | NT5M                       | 1,24 |
| transcription factor 20 (AR1)                                                 | TCF20                      | 1,24 |
| transcription factor 20 (AR1)                                                 | TCF20                      | 1,24 |
| proteasome subunit beta 1                                                     | PSMB1                      | 1,24 |
| chromosome 21 open reading frame 59                                           | C21orf59                   | 1,24 |
| cyclin D-type binding-protein 1                                               | CCNDBP1                    | 1,24 |
| transmembrane protein 114                                                     | TMEM114                    | 1,24 |
| nuclear pore complex interacting protein family, member B6                    | NPIP6                      | 1,24 |
| chromosome X open reading frame 57                                            | CXorf57                    | 1,24 |
| pleckstrin homology-like domain, family A, member 3                           | PHLDA3                     | 1,24 |
| kelch-like family member 36                                                   | KLHL36                     | 1,24 |
| G antigen 12I; G antigen 12F                                                  | GAGE12I;<br>GAGE12F        | 1,24 |
| misshapen-like kinase 1                                                       | MINK1                      | 1,24 |
| uncharacterized LOC102724238; uncharacterized LOC554249                       | LOC102724238;<br>LOC554249 | 1,24 |
| cholinergic receptor, muscarinic 4                                            | CHRM4                      | 1,24 |
| HEAT repeat containing 4                                                      | HEATR4                     | 1,24 |
| transmembrane protein 261                                                     | TMEM261                    | 1,24 |
| cadherin 15, type 1, M-cadherin (myotubule)                                   | CDH15                      | 1,24 |
| membrane-spanning 4-domains, subfamily A, member 15                           | MS4A15                     | 1,24 |
| FERM and PDZ domain containing 1                                              | FRMPD1                     | 1,24 |
| KH homology domain containing 1                                               | KHDC1                      | 1,24 |
| transient receptor potential cation channel, subfamily M, member 3            | TRPM3                      | 1,24 |
| WAP, follistatin/kazal, immunoglobulin, kunitz and netrin domain containing 2 | WFIKKN2                    | 1,24 |
| sterile alpha motif domain containing 14                                      | SAMD14                     | 1,24 |
| eukaryotic translation initiation factor 1A domain containing                 | EIF1AD                     | 1,24 |
| JAKMIP2 antisense RNA 1                                                       | JAKMIP2-AS1                | 1,24 |
| chromosome 10 open reading frame 54                                           | C10orf54                   | 1,24 |
| early growth response 3                                                       | EGR3                       | 1,24 |
| acrosomal vesicle protein 1                                                   | ACRV1                      | 1,24 |
| phosphatidylserine decarboxylase; microRNA 7109                               | PISD; MIR7109              | 1,24 |
| mitochondrial calcium uptake 1                                                | MICU1                      | 1,24 |
| toll-like receptor 1                                                          | TLR1                       | 1,24 |
| zinc finger protein 641                                                       | ZNF641                     | 1,24 |
| chromosome 1 open reading frame 123                                           | C1orf123                   | 1,24 |

|                                                                                                   |                |      |
|---------------------------------------------------------------------------------------------------|----------------|------|
| bladder cancer associated transcript 1 (non-protein coding); LEM domain containing 1              | BLACAT1; LEMD1 | 1,24 |
| piggyBac transposable element derived 5                                                           | PGBD5          | 1,24 |
| cysteinyl-tRNA synthetase                                                                         | CARS           | 1,24 |
| syntaxin binding protein 5-like                                                                   | STXBP5L        | 1,24 |
| leucine rich repeat containing 75A                                                                | LRRC75A        | 1,24 |
| zinc finger protein 667                                                                           | ZNF667         | 1,24 |
| polymerase (RNA) II (DNA directed) polypeptide G                                                  | POLR2G         | 1,24 |
| zinc finger protein 680                                                                           | ZNF680         | 1,24 |
| hdc homolog, cell cycle regulator                                                                 | HECA           | 1,24 |
| mitochondrial ribosomal protein L27                                                               | MRPL27         | 1,24 |
| zinc finger protein 600                                                                           | ZNF600         | 1,24 |
| chromosome 19 open reading frame 35                                                               | C19orf35       | 1,24 |
| nescient helix-loop-helix 2                                                                       | NHLH2          | 1,24 |
| rhodopsin                                                                                         | RHO            | 1,24 |
| OTU deubiquitinase 1                                                                              | OTUD1          | 1,24 |
| RAB6C, member RAS oncogene family                                                                 | RAB6C          | 1,24 |
| ALDH1L1 antisense RNA 1                                                                           | ALDH1L1-AS1    | 1,24 |
| actin-like 8                                                                                      | ACTL8          | 1,24 |
| cysteine sulfinic acid decarboxylase                                                              | CSAD           | 1,24 |
| protamine 1                                                                                       | PRM1           | 1,24 |
| StAR-related lipid transfer domain containing 3                                                   | STARD3         | 1,24 |
| IMP4 homolog, U3 small nucleolar ribonucleoprotein                                                | IMP4           | 1,24 |
| zinc finger, DHHC-type containing 14                                                              | ZDHHC14        | 1,24 |
| crystallin beta A2                                                                                | CRYBA2         | 1,24 |
| solute carrier family 9, subfamily A (NHE2, cation proton antiporter 2), member 2                 | SLC9A2         | 1,24 |
| EF-hand calcium binding domain 1                                                                  | EFCAB1         | 1,24 |
| sialic acid binding Ig-like lectin 6                                                              | SIGLEC6        | 1,24 |
| protein phosphatase 1, regulatory (inhibitor) subunit 14C                                         | PPP1R14C       | 1,24 |
| FXD domain containing ion transport regulator 7                                                   | FXD7           | 1,24 |
| ATPase, H <sup>+</sup> /K <sup>+</sup> exchanging, alpha polypeptide                              | ATP4A          | 1,24 |
| Memczak2013 ALT_ACCEPTOR, ALT_DONOR, coding, INTERNAL, intronic best transcript NM_006224         | PITPNA         | 1,24 |
| prostaglandin E receptor 2                                                                        | PTGER2         | 1,24 |
| fatty acid binding protein 12                                                                     | FABP12         | 1,24 |
| SWI/SNF related, matrix associated, actin dependent regulator of chromatin, subfamily c, member 2 | SMARCC2        | 1,24 |
| CUB and Sushi multiple domains 1                                                                  | CSMD1          | 1,24 |
| peroxisomal biogenesis factor 19                                                                  | PEX19          | 1,24 |

|                                                                                                                                                                                                                                                |                                  |      |
|------------------------------------------------------------------------------------------------------------------------------------------------------------------------------------------------------------------------------------------------|----------------------------------|------|
| Transcript Identified by AceView, Entrez Gene ID(s)<br>23527; ACAP2 intronic transcript 1 (non-protein coding)<br>[Source:HGNC Symbol;Acc:HGNC:41426]; novel transcript;<br>ACAP2 intronic transcript 1 [Source:HGNC<br>Symbol;Acc:HGNC:41426] | ACAP2; ACAP2-<br>IT1; AC090018.3 | 1,24 |
| late cornified envelope 3E                                                                                                                                                                                                                     | LCE3E                            | 1,23 |
| G protein pathway suppressor 1                                                                                                                                                                                                                 | GPS1                             | 1,23 |
| deleted in azoospermia 2; deleted in azoospermia 4                                                                                                                                                                                             | DAZ2; DAZ4                       | 1,23 |
| glutamate receptor, ionotropic, kainate 5                                                                                                                                                                                                      | GRIK5                            | 1,23 |
| heat shock 70kDa protein 4-like                                                                                                                                                                                                                | HSPA4L                           | 1,23 |
| thiopurine S-methyltransferase                                                                                                                                                                                                                 | TPMT                             | 1,23 |
| deleted in lymphocytic leukemia 1 (non-protein coding)                                                                                                                                                                                         | DLEU1                            | 1,23 |
| spermatogenesis associated 6-like                                                                                                                                                                                                              | SPATA6L                          | 1,23 |
| RuvB-like AAA ATPase 1                                                                                                                                                                                                                         | RUVBL1                           | 1,23 |
| bromodomain and PHD finger containing 1                                                                                                                                                                                                        | BRPF1                            | 1,23 |
| solute carrier family 4 (anion exchanger), member 1<br>(Diego blood group)                                                                                                                                                                     | SLC4A1                           | 1,23 |
| fibroblast growth factor 9                                                                                                                                                                                                                     | FGF9                             | 1,23 |
| leucine carboxyl methyltransferase 2                                                                                                                                                                                                           | LCMT2                            | 1,23 |
| MMP25 antisense RNA 1                                                                                                                                                                                                                          | MMP25-AS1                        | 1,23 |
| torsin family 2, member A                                                                                                                                                                                                                      | TOR2A                            | 1,23 |
| HMG box domain containing 4                                                                                                                                                                                                                    | HMGXB4                           | 1,23 |
| chromosome 2 open reading frame 50                                                                                                                                                                                                             | C2orf50                          | 1,23 |
| peroxisomal biogenesis factor 16                                                                                                                                                                                                               | PEX16                            | 1,23 |
| adrenoceptor alpha 1D                                                                                                                                                                                                                          | ADRA1D                           | 1,23 |
| chemokine (C-C motif) ligand 3-like 3; chemokine (C-C<br>motif) ligand 3-like 1                                                                                                                                                                | CCL3L3; CCL3L1                   | 1,23 |
| CCAAT/enhancer binding protein (C/EBP), beta                                                                                                                                                                                                   | CEBPB                            | 1,23 |
| transmembrane protein 44                                                                                                                                                                                                                       | TMEM44                           | 1,23 |
| N-ethylmaleimide-sensitive factor attachment protein,<br>gamma                                                                                                                                                                                 | NAPG                             | 1,23 |
| DnaJ (Hsp40) homolog, subfamily A, member 4                                                                                                                                                                                                    | DNAJA4                           | 1,23 |
| solute carrier family 25 (mitochondrial carrier;<br>peroxisomal membrane protein, 34kDa), member 17                                                                                                                                            | SLC25A17                         | 1,23 |
| keratin associated protein 5-1                                                                                                                                                                                                                 | KRTAP5-1                         | 1,23 |
| mir-99a-let-7c cluster host gene                                                                                                                                                                                                               | MIR99AHG                         | 1,23 |
| excision repair cross-complementation group 1                                                                                                                                                                                                  | ERCC1                            | 1,23 |
| forty-two-three domain containing 1                                                                                                                                                                                                            | FYTDD1                           | 1,23 |
| tubulin, alpha 3c                                                                                                                                                                                                                              | TUBA3C                           | 1,23 |
| TAF1 RNA polymerase II, TATA box binding protein (TBP)-<br>associated factor, 210kDa-like                                                                                                                                                      | TAF1L                            | 1,23 |
| phospholipase C, gamma 2 (phosphatidylinositol-specific)                                                                                                                                                                                       | PLCG2                            | 1,23 |
| vacuolar protein sorting 33 homolog A (S. cerevisiae)                                                                                                                                                                                          | VPS33A                           | 1,23 |

|                                                                              |                     |      |
|------------------------------------------------------------------------------|---------------------|------|
| protein phosphatase 1, regulatory (inhibitor) subunit 14D                    | PPP1R14D            | 1,23 |
| cyclin-dependent kinase 5, regulatory subunit 1 (p35)                        | CDK5R1              | 1,23 |
| deoxynucleotidyltransferase, terminal, interacting protein 1                 | DNTTIP1             | 1,23 |
| solute carrier family 30 (zinc transporter), member 3                        | SLC30A3             | 1,23 |
| Fanconi anemia complementation group B                                       | FANCB               | 1,23 |
| chemokine (C-X-C motif) ligand 3                                             | CXCL3               | 1,23 |
| TraB domain containing 2B                                                    | TRABD2B             | 1,23 |
| family with sequence similarity 110, member D                                | FAM110D             | 1,23 |
| nitric oxide synthase interacting protein                                    | NOSIP               | 1,23 |
| novel transcript; Transcript Identified by AceView, Entrez Gene ID(s) 389432 | RP11-307P5.1; SAMD5 | 1,23 |
| cat eye syndrome chromosome region, candidate 5                              | CECR5               | 1,23 |
| nucleoporin 58kDa                                                            | NUP58               | 1,23 |
| small proline-rich protein 2E                                                | SPRR2E              | 1,23 |
| signal peptide, CUB domain, EGF-like 1                                       | SCUBE1              | 1,23 |
| NPHP3-ACAD11 readthrough (NMD candidate)                                     | NPHP3-ACAD11        | 1,23 |
| integrin beta 3 binding protein (beta3-endonexin)                            | ITGB3BP             | 1,23 |
| NOP58 ribonucleoprotein                                                      | NOP58               | 1,23 |
| zinc finger, HIT-type containing 2                                           | ZNHIT2              | 1,23 |
| leucine rich repeat and fibronectin type III domain containing 5             | LRFN5               | 1,23 |
| absent in melanoma 2                                                         | AIM2                | 1,23 |
| fibronectin leucine rich transmembrane protein 2                             | FLRT2               | 1,23 |
| interferon stimulated exonuclease gene 20kDa like 2                          | ISG20L2             | 1,23 |
| family with sequence similarity 228, member B                                | FAM228B             | 1,23 |
| proline dehydrogenase (oxidase) 1                                            | PRODH               | 1,23 |
| neurofilament, medium polypeptide                                            | NEFM                | 1,23 |
| potassium channel, voltage gated Shal related subfamily D, member 1          | KCND1               | 1,23 |
| bola family member 2; bola family member 2B                                  | BOLA2; BOLA2B       | 1,23 |
| neuroblastoma breakpoint family, member 15                                   | NBPF15              | 1,23 |
| zinc finger, NFX1-type containing 1                                          | ZNFX1               | 1,23 |
| sorting nexin 3                                                              | SNX3                | 1,23 |
| SGT1 homolog, MIS12 kinetochore complex assembly cochaperone                 | SUGT1               | 1,23 |
| serine/arginine repetitive matrix 2                                          | SRRM2               | 1,23 |
| TELO2 interacting protein 2                                                  | TTI2                | 1,23 |
| S-antigen; retina and pineal gland (arrestin)                                | SAG                 | 1,23 |
| vesicular, overexpressed in cancer, prosurvival protein 1                    | VOPP1               | 1,23 |
| HKR1, GLI-Kruppel zinc finger family member                                  | HKR1                | 1,23 |
| olfactory receptor, family 51, subfamily S, member 1                         | OR51S1              | 1,23 |
| Transcript Identified by AceView, Entrez Gene ID(s) 23144                    | ZC3H3               | 1,23 |

|                                                                                                   |                |      |
|---------------------------------------------------------------------------------------------------|----------------|------|
| zinc finger and BTB domain containing 40                                                          | ZBTB40         | 1,23 |
| copper metabolism (Murr1) domain containing 1                                                     | COMMD1         | 1,23 |
| leucine rich transmembrane and O-methyltransferase domain containing                              | LRTOMT         | 1,23 |
| RAN binding protein 9                                                                             | RANBP9         | 1,23 |
| Zhang2013 ALT_ACCEPTOR, ALT_DONOR, coding, INTERNAL, intronic best transcript NM_001122823        | GTF3C5         | 1,23 |
| cytochrome c oxidase subunit II                                                                   | COX2           | 1,23 |
| olfactory receptor, family 9, subfamily K, member 2                                               | OR9K2          | 1,23 |
| karyopherin alpha 6 (importin alpha 7)                                                            | KPNA6          | 1,23 |
| ataxia, cerebellar, Cayman type                                                                   | ATCAY          | 1,23 |
| syntaxin binding protein 5 (tomosyn)                                                              | STXBP5         | 1,23 |
| mitogen-activated protein kinase kinase kinase 14                                                 | MAP3K14        | 1,23 |
| keratin associated protein 19-5                                                                   | KRTAP19-5      | 1,23 |
| transmembrane and coiled-coil domain family 3; microRNA 7844                                      | TMCC3; MIR7844 | 1,23 |
| periphilin 1                                                                                      | PPHLN1         | 1,23 |
| SKI2 homolog, superkiller viralicidic activity 2-like                                             | SKIV2L         | 1,23 |
| C-type lectin domain family 4, member A                                                           | CLEC4A         | 1,23 |
| calcium channel, voltage-dependent, beta 1 subunit                                                | CACNB1         | 1,23 |
| PRAME family member 19<br>[Source:EntrezGene;Acc:645414]                                          | PRAMEF19       | 1,23 |
| triggering receptor expressed on myeloid cells-like 2                                             | TREML2         | 1,23 |
| B-cell CLL/lymphoma 3; microRNA 8085                                                              | BCL3; MIR8085  | 1,23 |
| protocadherin 1                                                                                   | PCDH1          | 1,23 |
| TEA domain family member 4                                                                        | TEAD4          | 1,23 |
| NLR family, pyrin domain containing 11                                                            | NLRP11         | 1,23 |
| coiled-coil domain containing 28A                                                                 | CCDC28A        | 1,23 |
| t-complex 11 family, X-linked 2                                                                   | TCP11X2        | 1,23 |
| sushi domain containing 5                                                                         | SUSD5          | 1,23 |
| V-set and immunoglobulin domain containing 4                                                      | VSIG4          | 1,23 |
| paired box 8                                                                                      | PAX8           | 1,23 |
| cytochrome c oxidase subunit VIb polypeptide 1 (ubiquitous)                                       | COX6B1         | 1,23 |
| valosin containing protein (p97)/p47 complex interacting protein 1                                | VCPIP1         | 1,23 |
| trafficking protein particle complex 4                                                            | TRAPPC4        | 1,23 |
| RAB36, member RAS oncogene family                                                                 | RAB36          | 1,23 |
| sialic acid binding Ig-like lectin 11                                                             | SIGLEC11       | 1,23 |
| heat shock protein 90kDa alpha (cytosolic), class A member 1                                      | HSP90AA1       | 1,23 |
| Rho GTPase activating protein 27                                                                  | ARHGAP27       | 1,23 |
| serine peptidase inhibitor, Kazal type 14 (putative)                                              | SPINK14        | 1,23 |
| SWI/SNF related, matrix associated, actin dependent regulator of chromatin, subfamily d, member 3 | SMARCD3        | 1,23 |

|                                                                                                                  |                                                             |      |
|------------------------------------------------------------------------------------------------------------------|-------------------------------------------------------------|------|
| SET domain containing 4                                                                                          | SETD4                                                       | 1,23 |
| MAGE family member A11                                                                                           | MAGEA11                                                     | 1,23 |
| ST6 (alpha-N-acetyl-neuraminy-2,3-beta-galactosyl-1,3)-N-acetylgalactosaminide alpha-2,6-sialyltransferase 5     | ST6GALNAC5                                                  | 1,23 |
| zinc finger protein 812, pseudogene                                                                              | ZNF812P                                                     | 1,23 |
| SLX1 homolog A, structure-specific endonuclease subunit; SLX1 homolog B, structure-specific endonuclease subunit | SLX1A; SLX1B                                                | 1,23 |
| coiled-coil domain containing 113                                                                                | CCDC113                                                     | 1,23 |
| ST8 alpha-N-acetyl-neuraminide alpha-2,8-sialyltransferase 1                                                     | ST8SIA1                                                     | 1,23 |
| mediator complex subunit 16                                                                                      | MED16                                                       | 1,23 |
| protein phosphatase, EF-hand calcium binding domain 2                                                            | PPEF2                                                       | 1,23 |
| ADAM metalloproteinase domain 29                                                                                 | ADAM29                                                      | 1,23 |
| trafficking protein particle complex 4                                                                           | TRAPPC4                                                     | 1,23 |
| microcephalin 1                                                                                                  | MCPH1                                                       | 1,23 |
| AT hook, DNA binding motif, containing 1                                                                         | AHDC1                                                       | 1,23 |
| SET domain containing (lysine methyltransferase) 7                                                               | SETD7                                                       | 1,23 |
| leucine rich repeat containing 16B                                                                               | LRRC16B                                                     | 1,23 |
| ribosomal protein S6 kinase, 90kDa, polypeptide 1                                                                | RPS6KA1                                                     | 1,23 |
| adenylate kinase 8                                                                                               | AK8                                                         | 1,23 |
| splicing factor 3b subunit 6                                                                                     | SF3B6                                                       | 1,23 |
| survival motor neuron domain containing 1                                                                        | SMNDC1                                                      | 1,23 |
| olfactory receptor, family 52, subfamily I, member 2                                                             | OR52I2                                                      | 1,23 |
| peptidyl arginine deiminase, type IV                                                                             | PADI4                                                       | 1,23 |
| nudix hydrolase 15                                                                                               | NUDT15                                                      | 1,23 |
| LIM domain containing 2                                                                                          | LIMD2                                                       | 1,23 |
| mediator complex subunit 17                                                                                      | MED17                                                       | 1,23 |
| proteasome 26S subunit, non-ATPase 4                                                                             | PSMD4                                                       | 1,23 |
| TBC1 domain family, member 28                                                                                    | TBC1D28                                                     | 1,23 |
| coiled-coil domain containing 81                                                                                 | CCDC81                                                      | 1,23 |
| ubiquitin specific peptidase 8                                                                                   | USP8                                                        | 1,23 |
| carbonic anhydrase IV                                                                                            | CA4                                                         | 1,23 |
| keratin associated protein 5-4                                                                                   | KRTAP5-4                                                    | 1,23 |
| Rho guanine nucleotide exchange factor 4                                                                         | ARHGEF4                                                     | 1,23 |
| crystallin gamma N                                                                                               | CRYGN                                                       | 1,23 |
| zinc finger, C4H2 domain containing                                                                              | ZC4H2                                                       | 1,23 |
| flotillin 2                                                                                                      | FLOT2                                                       | 1,23 |
| uncharacterized LOC101928436; novel transcript; Transcript Identified by AceView                                 | LOC101928436;<br>RP11-153F1.1;<br>RP11-347K2.2;<br>teyfawbu | 1,23 |
| prostate and testis expressed 4                                                                                  | PATE4                                                       | 1,23 |
| Down syndrome critical region 10 (non-protein coding)                                                            | DSCR10                                                      | 1,23 |
| family with sequence similarity 81, member A                                                                     | FAM81A                                                      | 1,23 |

|                                                                                              |                                  |      |
|----------------------------------------------------------------------------------------------|----------------------------------|------|
| neurocalcin delta                                                                            | NCALD                            | 1,22 |
| TMEM189-UBE2V1 readthrough                                                                   | TMEM189-UBE2V1                   | 1,22 |
| LY6/PLAUR domain containing 3                                                                | LYPD3                            | 1,22 |
| glutathione S-transferase kappa 1                                                            | GSTK1                            | 1,22 |
| FAT atypical cadherin 1                                                                      | FAT1                             | 1,22 |
| HECT, C2 and WW domain containing E3 ubiquitin protein ligase 1                              | HECW1                            | 1,22 |
| cartilage acidic protein 1                                                                   | CRTAC1                           | 1,22 |
| PWP2 periodic tryptophan protein homolog (yeast)                                             | PWP2                             | 1,22 |
| leptin                                                                                       | LEP                              | 1,22 |
| Jeck2013 ALT_ACCEPTOR, ALT_DONOR, coding, INTERNAL, intronic best transcript NM_032531       | KIRREL3                          | 1,22 |
| hexokinase 3 (white cell)                                                                    | HK3                              | 1,22 |
| wingless-type MMTV integration site family, member 6                                         | WNT6                             | 1,22 |
| zinc finger CCHC-type and RNA binding motif 1; microRNA 7851                                 | ZCRB1; MIR7851                   | 1,22 |
| acid phosphatase 6, lysophosphatidic                                                         | ACP6                             | 1,22 |
| small integral membrane protein 2                                                            | SMIM2                            | 1,22 |
| inositol polyphosphate-5-phosphatase D                                                       | INPP5D                           | 1,22 |
| spectrin, alpha, non-erythrocytic 1                                                          | SPTAN1                           | 1,22 |
| keratin associated protein 19-4                                                              | KRTAP19-4                        | 1,22 |
| VAMP (vesicle-associated membrane protein)-associated protein B and C                        | VAPB                             | 1,22 |
| nucleic acid binding protein 2                                                               | NABP2                            | 1,22 |
| emerin                                                                                       | EMD                              | 1,22 |
| keratin associated protein 4-1                                                               | KRTAP4-1                         | 1,22 |
| Memczak2013 ALT_ACCEPTOR, ALT_DONOR, coding, INTERNAL, intronic best transcript NM_001031711 | ERGIC1                           | 1,22 |
| myosin phosphatase Rho interacting protein                                                   | MPRIP                            | 1,22 |
| NADPH oxidase 1                                                                              | NOX1                             | 1,22 |
| hydroxysteroid (17-beta) dehydrogenase 14                                                    | HSD17B14                         | 1,22 |
| myosin light chain, phosphorylatable, fast skeletal muscle                                   | MYLPF                            | 1,22 |
| transmembrane protein 241                                                                    | TMEM241                          | 1,22 |
| interleukin 20 receptor, alpha                                                               | IL20RA                           | 1,22 |
| novel transcript; Transcript Identified by AceView, Entrez Gene ID(s) 199964                 | RP11-67L3.5; RP11-67L3.4; TMEM61 | 1,22 |
| keratin associated protein 1-5                                                               | KRTAP1-5                         | 1,22 |
| transmembrane protein 14E, pseudogene                                                        | TMEM14EP                         | 1,22 |
| ribonuclease, RNase A family, 1 (pancreatic)                                                 | RNASE1                           | 1,22 |
| opioid binding protein/cell adhesion molecule-like                                           | OPCML                            | 1,22 |
| CD177 molecule                                                                               | CD177                            | 1,22 |
| proline rich, Y-linked                                                                       | PRORY                            | 1,22 |

|                                                                                        |           |      |
|----------------------------------------------------------------------------------------|-----------|------|
| Salzman2013 ANNOTATED, CDS, coding, INTERNAL, OVCODE, OVEXON best transcript NM_006219 | PIK3CB    | 1,22 |
| zinc finger protein 491                                                                | ZNF491    | 1,22 |
| Leber congenital amaurosis 5-like                                                      | LCA5L     | 1,22 |
| zinc finger protein 582                                                                | ZNF582    | 1,22 |
| cytochrome P450, family 2, subfamily A, polypeptide 7                                  | CYP2A7    | 1,22 |
| C1q and tumor necrosis factor related protein 2                                        | C1QTNF2   | 1,22 |
| otoferlin                                                                              | OTOF      | 1,22 |
| bobby sox homolog (Drosophila)                                                         | BBX       | 1,22 |
| zinc finger, DHHC-type containing 21                                                   | ZDHHC21   | 1,22 |
| ubiquitin conjugating enzyme E2D 3                                                     | UBE2D3    | 1,22 |
| chromosome 9 open reading frame 43                                                     | C9orf43   | 1,22 |
| keratin associated protein 4-8                                                         | KRTAP4-8  | 1,22 |
| Memczak2013 ANTISENSE, coding, INTERNAL, intronic best transcript NM_079423            | MYL6      | 1,22 |
| centromere protein N                                                                   | CENPN     | 1,22 |
| Transcript Identified by AceView, Entrez Gene ID(s) 4643                               | MYO1E     | 1,22 |
| UDP-galactose-4-epimerase                                                              | GALE      | 1,22 |
| MAS1 proto-oncogene, G protein-coupled receptor                                        | MAS1      | 1,22 |
| complement component 8, gamma polypeptide                                              | C8G       | 1,22 |
| methyltransferase like 21C                                                             | METTL21C  | 1,22 |
| long intergenic non-protein coding RNA 1387                                            | LINC01387 | 1,22 |
| BCL2-like 14 (apoptosis facilitator)                                                   | BCL2L14   | 1,22 |
| chromosome 9 open reading frame 9                                                      | C9orf9    | 1,22 |
| membrane associated guanylate kinase, WW and PDZ domain containing 3                   | MAGI3     | 1,22 |
| neurexophilin 2                                                                        | NXPH2     | 1,22 |
| mohawk homeobox                                                                        | MKX       | 1,22 |
| forkhead box F1                                                                        | FOXF1     | 1,22 |
| neuromedin U receptor 2                                                                | NMUR2     | 1,22 |
| glucosamine-6-phosphate deaminase 2                                                    | GNPDA2    | 1,22 |
| family with sequence similarity 229, member A                                          | FAM229A   | 1,22 |
| Hermansky-Pudlak syndrome 3                                                            | HPS3      | 1,22 |
| retinoblastoma binding protein 5                                                       | RBBP5     | 1,22 |
| protein-O-mannosyltransferase 2                                                        | POMT2     | 1,22 |
| pre-mRNA processing factor 31                                                          | PRPF31    | 1,22 |
| deltex 3, E3 ubiquitin ligase                                                          | DTX3      | 1,22 |
| keratin 13, type I                                                                     | KRT13     | 1,22 |
| TMF1-regulated nuclear protein 1                                                       | TRNP1     | 1,22 |
| ATPase, H <sup>+</sup> transporting, lysosomal 13kDa, V1 subunit G3                    | ATP6V1G3  | 1,22 |
| CD72 molecule                                                                          | CD72      | 1,22 |



|                                                                                                                                                                           |                       |      |
|---------------------------------------------------------------------------------------------------------------------------------------------------------------------------|-----------------------|------|
| uncharacterized LOC100652768; Salzman2013 ANNOTATED, ncRNA, OVCODE, OVERLAPTX, OVEXON best transcript NR_045215; Transcript Identified by AceView, Entrez Gene ID(s) 9159 | LOC100652768; PCSK7   | 1,22 |
| adaptor-related protein complex 2, alpha 1 subunit                                                                                                                        | AP2A1                 | 1,22 |
| G antigen 4; G antigen 7; G antigen 12G                                                                                                                                   | GAGE4; GAGE7; GAGE12G | 1,22 |
| lectin, galactoside-binding, soluble, 7B                                                                                                                                  | LGALS7B               | 1,22 |
| Zhang2013 ALT_ACCEPTOR, ALT_DONOR, coding, INTERNAL, intronic best transcript NM_020338                                                                                   | ZMIZ1                 | 1,22 |
| Transcript Identified by AceView, Entrez Gene ID(s) 4731                                                                                                                  | NDUFV3                | 1,22 |
| N-acetylneuraminate pyruvate lyase (dihydrodipicolinate synthase)                                                                                                         | NPL                   | 1,22 |
| phenylalanyl-tRNA synthetase beta subunit                                                                                                                                 | FARSB                 | 1,22 |
| nerve growth factor receptor                                                                                                                                              | NGFR                  | 1,22 |
| MAGE family member A8                                                                                                                                                     | MAGEA8                | 1,22 |
| interleukin 18 receptor accessory protein                                                                                                                                 | IL18RAP               | 1,22 |
| zinc finger protein 182                                                                                                                                                   | ZNF182                | 1,22 |
| B-cell receptor-associated protein 31                                                                                                                                     | BCAP31                | 1,22 |
| zinc finger protein 750                                                                                                                                                   | ZNF750                | 1,22 |
| CDP-diacylglycerol--inositol 3-phosphatidyltransferase                                                                                                                    | CDIPT                 | 1,22 |
| gamma-aminobutyric acid (GABA) B receptor, 1                                                                                                                              | GABBR1                | 1,22 |
| centrosomal protein 76kDa                                                                                                                                                 | CEP76                 | 1,22 |
| thrombospondin type 1 domain containing 4                                                                                                                                 | THSD4                 | 1,22 |
| SECIS binding protein 2-like                                                                                                                                              | SECISBP2L             | 1,22 |
| G protein regulated inducer of neurite outgrowth 1                                                                                                                        | GPRIN1                | 1,22 |
| gap junction protein alpha 4                                                                                                                                              | GJA4                  | 1,22 |
| acetylcholinesterase (Yt blood group)                                                                                                                                     | ACHE                  | 1,22 |
| urocortin 3                                                                                                                                                               | UCN3                  | 1,22 |
| G protein-coupled receptor 162                                                                                                                                            | GPR162                | 1,22 |
| ubiquitin specific peptidase 17-like family member 2                                                                                                                      | USP17L2               | 1,22 |
| diphthamide biosynthesis 3                                                                                                                                                | DPH3                  | 1,22 |
| tubulin, beta 4A class IVa                                                                                                                                                | TUBB4A                | 1,22 |
| translocase of inner mitochondrial membrane domain containing 1                                                                                                           | TIMMDC1               | 1,22 |
| chromosome 5 open reading frame 52                                                                                                                                        | C5orf52               | 1,22 |
| protein phosphatase, Mg2+/Mn2+ dependent, 1M                                                                                                                              | PPM1M                 | 1,22 |
| scavenger receptor cysteine rich family, 5 domains                                                                                                                        | SSC5D                 | 1,22 |
| lymphocyte transmembrane adaptor 1                                                                                                                                        | LAX1                  | 1,22 |
| keratin 74, type II                                                                                                                                                       | KRT74                 | 1,22 |
| zinc finger, DHHC-type containing 16                                                                                                                                      | ZDHHC16               | 1,22 |
| olfactory receptor, family 10, subfamily Z, member 1                                                                                                                      | OR10Z1                | 1,22 |
| chromosome 20 open reading frame 78                                                                                                                                       | C20orf78              | 1,22 |
| exocyst complex component 3-like 2                                                                                                                                        | EXOC3L2               | 1,22 |

|                                                                                                                     |                |      |
|---------------------------------------------------------------------------------------------------------------------|----------------|------|
| transmembrane protein 42                                                                                            | TMEM42         | 1,22 |
| stromal interaction molecule 1; microRNA 4687                                                                       | STIM1; MIR4687 | 1,22 |
| myelin transcription factor 1                                                                                       | MYT1           | 1,22 |
| ryanodine receptor 2 (cardiac)                                                                                      | RYR2           | 1,22 |
| methionyl-tRNA synthetase 2, mitochondrial                                                                          | MARS2          | 1,22 |
| mitochondrial trans-2-enoyl-CoA reductase                                                                           | MECR           | 1,22 |
| ubiquitin 1                                                                                                         | UBN1           | 1,22 |
| kielins/chordin-like protein                                                                                        | KCP            | 1,22 |
| nucleoside diphosphate kinase 17                                                                                    | NUDT17         | 1,22 |
| anti-Müllerian hormone; microRNA 4321                                                                               | AMH; MIR4321   | 1,22 |
| RNA binding motif protein, Y-linked, family 1, member J;<br>RNA binding motif protein, Y-linked, family 1, member F | RBMJ1J; RBMJ1F | 1,22 |
| lipocalin 9                                                                                                         | LCN9           | 1,22 |
| chromosome 22 open reading frame 24                                                                                 | C22orf24       | 1,22 |
| tektin 5                                                                                                            | TEKT5          | 1,22 |
| WAP four-disulfide core domain 1                                                                                    | WFDC1          | 1,22 |
| cilia and flagella associated protein 45                                                                            | CFAP45         | 1,22 |
| calcium binding protein 5                                                                                           | CABP5          | 1,22 |
| heat shock 70kDa protein 12A                                                                                        | HSPA12A        | 1,22 |
| phospholipid phosphatase 2                                                                                          | PLPP2          | 1,22 |
| netrin G1                                                                                                           | NTNG1          | 1,22 |
| coiled-coil domain containing 84                                                                                    | CCDC84         | 1,22 |
| diacylglycerol kinase, delta 130kDa                                                                                 | DGKD           | 1,22 |
| DCN1, defective in cullin neddylation 1, domain<br>containing 3                                                     | DCUN1D3        | 1,22 |
| REST corepressor 3                                                                                                  | RCOR3          | 1,22 |
| zinc finger protein 486                                                                                             | ZNF486         | 1,22 |
| COMM domain containing 5                                                                                            | COMMD5         | 1,22 |
| selenoprotein W, 1                                                                                                  | SEPW1          | 1,22 |
| InaF-motif containing 1                                                                                             | INAFM1         | 1,22 |
| Transcript Identified by AceView, Entrez Gene ID(s) 5552                                                            | SRGN           | 1,22 |
| lysosomal-associated membrane protein 1                                                                             | LAMP1          | 1,22 |
| TSC22 domain family, member 1                                                                                       | TSC22D1        | 1,22 |
| Fas (TNFRSF6)-associated via death domain                                                                           | FADD           | 1,22 |
| Transcript Identified by AceView, Entrez Gene ID(s) 7227                                                            | TRPS1          | 1,22 |
| zinc finger, X-linked, duplicated B                                                                                 | ZXDB           | 1,22 |
| cilia and flagella associated protein 73                                                                            | CFAP73         | 1,22 |
| ribosomal protein S6 kinase, 90kDa, polypeptide 1                                                                   | RPS6KA1        | 1,22 |
| zinc finger, MYND-type containing 8                                                                                 | ZMYND8         | 1,22 |
| signal recognition particle 14kDa                                                                                   | SRP14          | 1,22 |
| G protein-coupled receptor 142                                                                                      | GPR142         | 1,22 |

|                                                                                                                                                                                                        |                               |      |
|--------------------------------------------------------------------------------------------------------------------------------------------------------------------------------------------------------|-------------------------------|------|
| calcium channel, voltage-dependent, L type, alpha 1D subunit                                                                                                                                           | CACNA1D                       | 1,21 |
| TATA box binding protein associated factor 8                                                                                                                                                           | TAF8                          | 1,21 |
| chromosome 9 open reading frame 170                                                                                                                                                                    | C9orf170                      | 1,21 |
| otospiralin                                                                                                                                                                                            | OTOS                          | 1,21 |
| oxysterol binding protein-like 6                                                                                                                                                                       | OSBPL6                        | 1,21 |
| uncharacterized LOC150527; uncharacterized LOC646743; Transcript Identified by AceView, Entrez Gene ID(s) 646743, RefSeq ID(s) NR_033930; Uncharacterized protein [Source:UniProtKB/TrEMBL;Acc:B9A039] | TISP43; LOC646743; AC013269.5 | 1,21 |
| Fc fragment of IgG, low affinity IIa, receptor (CD32)                                                                                                                                                  | FCGR2A                        | 1,21 |
| membrane associated ring finger 2                                                                                                                                                                      | MARCH2                        | 1,21 |
| pyrin and HIN domain family, member 1                                                                                                                                                                  | PYHIN1                        | 1,21 |
| G antigen 1                                                                                                                                                                                            | GAGE1                         | 1,21 |
| cyclin-dependent kinase 9                                                                                                                                                                              | CDK9                          | 1,21 |
| EF-hand calcium binding domain 5                                                                                                                                                                       | EFCAB5                        | 1,21 |
| dynactin 3 (p22)                                                                                                                                                                                       | DCTN3                         | 1,21 |
| alkaline phosphatase, placental                                                                                                                                                                        | ALPP                          | 1,21 |
| rabphilin 3A                                                                                                                                                                                           | RPH3A                         | 1,21 |
| chromosome X open reading frame 66                                                                                                                                                                     | CXorf66                       | 1,21 |
| prefoldin subunit 6; microRNA 6834                                                                                                                                                                     | PFDN6; MIR6834                | 1,21 |
| DnaJ (Hsp40) homolog, subfamily C, member 9                                                                                                                                                            | DNAJC9                        | 1,21 |
| FK506 binding protein 5                                                                                                                                                                                | FKBP5                         | 1,21 |
| family with sequence similarity 25, member A                                                                                                                                                           | FAM25A                        | 1,21 |
| protein phosphatase 1, regulatory (inhibitor) subunit 14B                                                                                                                                              | PPP1R14B                      | 1,21 |
| Transcript Identified by AceView, Entrez Gene ID(s) 284440; 440515                                                                                                                                     | ZNF506                        | 1,21 |
| chromosome 8 open reading frame 33                                                                                                                                                                     | C8orf33                       | 1,21 |
| endothelin receptor type A                                                                                                                                                                             | EDNRA                         | 1,21 |
| zinc finger and SCAN domain containing 23                                                                                                                                                              | ZSCAN23                       | 1,21 |
| Transcript Identified by AceView, Entrez Gene ID(s) 5126                                                                                                                                               | PCSK2                         | 1,21 |
| kinase suppressor of ras 2                                                                                                                                                                             | KSR2                          | 1,21 |
| myosin XIX                                                                                                                                                                                             | MYO19                         | 1,21 |
| solute carrier family 10 (sodium/bile acid cotransporter), member 1                                                                                                                                    | SLC10A1                       | 1,21 |
| solute carrier family 5 (sodium/iodide cotransporter), member 5                                                                                                                                        | SLC5A5                        | 1,21 |
| leucine-zipper-like transcription regulator 1                                                                                                                                                          | LZTR1                         | 1,21 |
| endogenous retrovirus group V, member 1                                                                                                                                                                | ERVV-1                        | 1,21 |
| myeloid zinc finger 1                                                                                                                                                                                  | MZF1                          | 1,21 |
| variable charge, Y-linked; variable charge, Y-linked 1B                                                                                                                                                | VCY; VCY1B                    | 1,21 |
| limb bud and heart development                                                                                                                                                                         | LBH                           | 1,21 |

|                                                                       |               |      |
|-----------------------------------------------------------------------|---------------|------|
| EGF-like repeats and discoidin I-like domains 3                       | EDIL3         | 1,21 |
| keratin associated protein 5-8                                        | KRTAP5-8      | 1,21 |
| Transcript Identified by AceView, Entrez Gene ID(s) 80230             | RUFY1         | 1,21 |
| centrosomal protein 290kDa                                            | CEP290        | 1,21 |
| olfactory receptor, family 2, subfamily A, member 4                   | OR2A4         | 1,21 |
| podocalyxin-like                                                      | PODXL         | 1,21 |
| NADH dehydrogenase (ubiquinone) 1 alpha subcomplex, 3, 9kDa           | NDUFA3        | 1,21 |
| meprin A, beta                                                        | MEP1B         | 1,21 |
| cofilin 1 (non-muscle)                                                | CFL1          | 1,21 |
| protein phosphatase 1, regulatory subunit 12A                         | PPP1R12A      | 1,21 |
| crystallin beta A4                                                    | CRYBA4        | 1,21 |
| LIM and calponin homology domains 1                                   | LIMCH1        | 1,21 |
| tubulin, beta 8 class VIII                                            | TUBB8         | 1,21 |
| family with sequence similarity 228, member A                         | FAM228A       | 1,21 |
| myosin ID                                                             | MYO1D         | 1,21 |
| proline-rich coiled-coil 2A                                           | PRRC2A        | 1,21 |
| testis-specific serine kinase 3                                       | TSSK3         | 1,21 |
| polymerase (RNA) III (DNA directed) polypeptide G (32kD)-like         | POLR3GL       | 1,21 |
| transmembrane protein 106C                                            | TMEM106C      | 1,21 |
| proline and serine rich 2                                             | PROSER2       | 1,21 |
| lysophospholipase-like 1                                              | LYPLAL1       | 1,21 |
| glycophorin C (Gerbich blood group)                                   | GYPC          | 1,21 |
| MORN repeat containing 3                                              | MORN3         | 1,21 |
| syntrophin, gamma 1                                                   | SNTG1         | 1,21 |
| B-cell linker                                                         | BLNK          | 1,21 |
| proline rich 26                                                       | PRR26         | 1,21 |
| block of proliferation 1; microRNA 7112                               | BOP1; MIR7112 | 1,21 |
| caveolin 1                                                            | CAV1          | 1,21 |
| chromosome 2 open reading frame 61                                    | C2orf61       | 1,21 |
| mitochondrial ribosomal protein S18A                                  | MRPS18A       | 1,21 |
| C-type lectin domain family 14, member A                              | CLEC14A       | 1,21 |
| ferritin, heavy polypeptide 1 pseudogene 18                           | FTH1P18       | 1,21 |
| Kruppel-like factor 1 (erythroid)                                     | KLF1          | 1,21 |
| neuronal growth regulator 1                                           | NEGR1         | 1,21 |
| myotubularin related protein 1                                        | MTMR1         | 1,21 |
| olfactory receptor, family 5, subfamily L, member 1 (gene/pseudogene) | OR5L1         | 1,21 |
| chromosome 12 open reading frame 56                                   | C12orf56      | 1,21 |
| urocortin                                                             | UCN           | 1,21 |
| tRNA aspartic acid methyltransferase 1                                | TRDMT1        | 1,21 |
| glutamate receptor, metabotropic 7                                    | GRM7          | 1,21 |
| keratin associated protein 9-6                                        | KRTAP9-6      | 1,21 |

|                                                                                                                 |                                                                                |      |
|-----------------------------------------------------------------------------------------------------------------|--------------------------------------------------------------------------------|------|
| stabilin 2                                                                                                      | STAB2                                                                          | 1,21 |
| cytochrome P450, family 4, subfamily A, polypeptide 22                                                          | CYP4A22                                                                        | 1,21 |
| CSE1 chromosome segregation 1-like (yeast)                                                                      | CSE1L                                                                          | 1,21 |
| IQ motif containing H                                                                                           | IQCH                                                                           | 1,21 |
| CD200 molecule                                                                                                  | CD200                                                                          | 1,21 |
| potassium channel, two pore domain subfamily K, member 2                                                        | KCNK2                                                                          | 1,21 |
| G antigen 12F; G antigen 12J; G antigen 12D; G antigen 5; G antigen 6; G antigen 12B; G antigen 4; G antigen 2E | GAGE12F;<br>GAGE12J;<br>GAGE12D;<br>GAGE5; GAGE6;<br>GAGE12B;<br>GAGE4; GAGE2E | 1,21 |
| immediate early response 5-like                                                                                 | IER5L                                                                          | 1,21 |
| spectrin, beta, non-erythrocytic 1                                                                              | SPTBN1                                                                         | 1,21 |
| NDUFA4, mitochondrial complex associated                                                                        | NDUFA4                                                                         | 1,21 |
| PWWP domain containing 2B                                                                                       | PWWP2B                                                                         | 1,21 |
| CD200 receptor 1                                                                                                | CD200R1                                                                        | 1,21 |
| solute carrier family 24 (sodium/potassium/calcium exchanger), member 2                                         | SLC24A2                                                                        | 1,21 |
| olfactory receptor, family 2, subfamily T, member 2                                                             | OR2T2                                                                          | 1,21 |
| coiled-coil domain containing 94                                                                                | CCDC94                                                                         | 1,21 |
| calcium binding protein 1                                                                                       | CABP1                                                                          | 1,21 |
| calmodulin regulated spectrin-associated protein 1                                                              | CAMSAP1                                                                        | 1,21 |
| family with sequence similarity 196, member A                                                                   | FAM196A                                                                        | 1,21 |
| leucine-rich repeats and WD repeat domain containing 1; microRNA 4467; microRNA 5090                            | LRWD1; MIR4467;<br>MIR5090                                                     | 1,21 |
| DDB1 and CUL4 associated factor 4-like 1                                                                        | DCAF4L1                                                                        | 1,21 |
| keratin associated protein 5-11                                                                                 | KRTAP5-11                                                                      | 1,21 |
| FtsJ RNA methyltransferase homolog 1 (E. coli)                                                                  | FTSJ1                                                                          | 1,21 |
| WD repeat domain 20                                                                                             | WDR20                                                                          | 1,21 |
| myelin associated glycoprotein                                                                                  | MAG                                                                            | 1,21 |
| cyclin N-terminal domain containing 1                                                                           | CNTD1                                                                          | 1,21 |
| solute carrier family 35, member E3                                                                             | SLC35E3                                                                        | 1,21 |
| Jeck2013 ANTISENSE, CDS, coding, INTERNAL, intronic, OVCODE, OVEXON best transcript NM_002183                   | IL3RA                                                                          | 1,21 |
| ubiquitin specific peptidase 5 (isopeptidase T)                                                                 | USP5                                                                           | 1,21 |
| atrophin 1                                                                                                      | ATN1                                                                           | 1,21 |
| autophagy related 12                                                                                            | ATG12                                                                          | 1,21 |
| cyclin D2                                                                                                       | CCND2                                                                          | 1,21 |
| casein kinase 1, alpha 1-like                                                                                   | CSNK1A1L                                                                       | 1,21 |
| dual specificity tyrosine-(Y)-phosphorylation regulated kinase 1B                                               | DYRK1B                                                                         | 1,21 |
| keratin associated protein 12-1                                                                                 | KRTAP12-1                                                                      | 1,21 |

|                                                                                                      |             |      |
|------------------------------------------------------------------------------------------------------|-------------|------|
| POU class 1 homeobox 1                                                                               | POU1F1      | 1,21 |
| solute carrier family 16 (monocarboxylate transporter), member 1                                     | SLC16A1     | 1,21 |
| family with sequence similarity 173, member A                                                        | FAM173A     | 1,21 |
| solute carrier family 30 (zinc transporter), member 2                                                | SLC30A2     | 1,21 |
| TSNAX-DISC1 readthrough (NMD candidate)                                                              | TSNAX-DISC1 | 1,21 |
| kinesin family member 24                                                                             | KIF24       | 1,21 |
| ER membrane protein complex subunit 10                                                               | EMC10       | 1,21 |
| mucolipin 3                                                                                          | MCOLN3      | 1,21 |
| steroid-5-alpha-reductase, alpha polypeptide 1 (3-oxo-5 alpha-steroid delta 4-dehydrogenase alpha 1) | SRD5A1      | 1,21 |
| formin homology 2 domain containing 3                                                                | FHOD3       | 1,21 |
| single stranded DNA binding protein 3                                                                | SSBP3       | 1,21 |
| chromosome 2 open reading frame 44                                                                   | C2orf44     | 1,21 |
| nuclear pore complex interacting protein family, member B4                                           | NPIP4       | 1,21 |
| transmembrane protein 102                                                                            | TMEM102     | 1,21 |
| NFS1 cysteine desulfurase                                                                            | NFS1        | 1,21 |
| somatostatin receptor 3                                                                              | SSTR3       | 1,21 |
| RAB8A, member RAS oncogene family                                                                    | RAB8A       | 1,21 |
| Harvey rat sarcoma viral oncogene homolog                                                            | HRAS        | 1,21 |
| polymerase (DNA directed), lambda                                                                    | POLL        | 1,21 |
| S100 calcium binding protein A9                                                                      | S100A9      | 1,21 |
| tetratricopeptide repeat and ankyrin repeat containing 1                                             | TRANK1      | 1,21 |
| nuclear fragile X mental retardation protein interacting protein 1                                   | NUFIP1      | 1,21 |
| Memczak2013 ANTISENSE, coding, INTERNAL, intronic best transcript NM_153234                          | LIX1        | 1,21 |
| unc-13 homolog A (C. elegans)                                                                        | UNC13A      | 1,21 |
| T-cell leukemia homeobox 1                                                                           | TLX1        | 1,21 |
| R3H domain containing 4                                                                              | R3HDM4      | 1,21 |
| microtubule associated monooxygenase, calponin and LIM domain containing 2                           | MICAL2      | 1,21 |
| collagen and calcium binding EGF domains 1                                                           | CCBE1       | 1,21 |
| keratin associated protein 3-2                                                                       | KRTAP3-2    | 1,21 |
| ubiquitin specific peptidase 14 (tRNA-guanine transglycosylase)                                      | USP14       | 1,21 |
| sterile alpha motif domain containing 9-like                                                         | SAMD9L      | 1,20 |
| olfactory receptor, family 52, subfamily A, member 1                                                 | OR52A1      | 1,20 |
| phospholipid phosphatase 4                                                                           | PLPP4       | 1,20 |
| long intergenic non-protein coding RNA 521                                                           | LINC00521   | 1,20 |
| cysteine-rich protein 2                                                                              | CRIP2       | 1,20 |
| SH3 domain and tetratricopeptide repeats 1                                                           | SH3TC1      | 1,20 |
| Usher syndrome 1C                                                                                    | USH1C       | 1,20 |
| GATA binding protein 3                                                                               | GATA3       | 1,20 |

|                                                                                                                                                                                                 |                                       |      |
|-------------------------------------------------------------------------------------------------------------------------------------------------------------------------------------------------|---------------------------------------|------|
| olfactory receptor, family 8, subfamily H, member 2                                                                                                                                             | OR8H2                                 | 1,20 |
| regulator of G-protein signaling 7                                                                                                                                                              | RGS7                                  | 1,20 |
| transmembrane protein 105                                                                                                                                                                       | TMEM105                               | 1,20 |
| chromosome 19 open reading frame 45                                                                                                                                                             | C19orf45                              | 1,20 |
| solute carrier family 46, member 2                                                                                                                                                              | SLC46A2                               | 1,20 |
| granzyme A                                                                                                                                                                                      | GZMA                                  | 1,20 |
| ubiquitin related modifier 1                                                                                                                                                                    | URM1                                  | 1,20 |
| vestigial-like family member 2                                                                                                                                                                  | VGLL2                                 | 1,20 |
| unc-93 homolog B1 (C. elegans)                                                                                                                                                                  | UNC93B1                               | 1,20 |
| flavin containing monooxygenase 3                                                                                                                                                               | FMO3                                  | 1,20 |
| vacuolar protein sorting 4 homolog A (S. cerevisiae)                                                                                                                                            | VPS4A                                 | 1,20 |
| sirtuin 1                                                                                                                                                                                       | SIRT1                                 | 1,20 |
| intelectin 1 (galactofuranose binding)                                                                                                                                                          | ITLN1                                 | 1,20 |
| chromosome 5 open reading frame 22                                                                                                                                                              | C5orf22                               | 1,20 |
| rhomboid, veinlet-like 3 (Drosophila)                                                                                                                                                           | RHBDL3                                | 1,20 |
| solute carrier family 4, sodium borate transporter, member 11                                                                                                                                   | SLC4A11                               | 1,20 |
| NADH dehydrogenase (ubiquinone) Fe-S protein 5, 15kDa (NADH-coenzyme Q reductase)                                                                                                               | NDUFS5                                | 1,20 |
| keratin 24, type I                                                                                                                                                                              | KRT24                                 | 1,20 |
| long intergenic non-protein coding RNA 1547                                                                                                                                                     | LINC01547                             | 1,20 |
| CDC42 binding protein kinase alpha (DMPK-like)                                                                                                                                                  | CDC42BPA                              | 1,20 |
| potassium channel, voltage gated eag related subfamily H, member 7                                                                                                                              | KCNH7                                 | 1,20 |
| TruB pseudouridine (psi) synthase family member 2                                                                                                                                               | TRUB2                                 | 1,20 |
| bicaudal D homolog 2 (Drosophila)                                                                                                                                                               | BICD2                                 | 1,20 |
| elongator acetyltransferase complex subunit 4                                                                                                                                                   | ELP4                                  | 1,20 |
| GRAM domain containing 4                                                                                                                                                                        | GRAMD4                                | 1,20 |
| widely interspaced zinc finger motifs                                                                                                                                                           | WIZ                                   | 1,20 |
| kelch domain containing 4                                                                                                                                                                       | KLHDC4                                | 1,20 |
| ankyrin repeat domain 62                                                                                                                                                                        | ANKRD62                               | 1,20 |
| late cornified envelope-like proline-rich 1                                                                                                                                                     | LELP1                                 | 1,20 |
| Transcript Identified by AceView; family with sequence similarity 25, member D [Source:HGNC Symbol;Acc:23588]; family with sequence similarity 25, member E [Source:HGNC Symbol;Acc:HGNC:23587] | buskee; FAM25D;<br>FAM25E;<br>zawskaw | 1,20 |
| grainyhead-like transcription factor 2                                                                                                                                                          | GRHL2                                 | 1,20 |
| chromosome 1 open reading frame 127                                                                                                                                                             | C1orf127                              | 1,20 |
| myosin light chain 4                                                                                                                                                                            | MYL4                                  | 1,20 |
| leukocyte receptor cluster (LRC) member 1                                                                                                                                                       | LENG1                                 | 1,20 |
| nucleolar protein 3 (apoptosis repressor with CARD domain)                                                                                                                                      | NOL3                                  | 1,20 |
| defensin, beta 114                                                                                                                                                                              | DEFB114                               | 1,20 |
| phospholipase A2, group IVD (cytosolic)                                                                                                                                                         | PLA2G4D                               | 1,20 |
| syntabulin (syntaxin-interacting)                                                                                                                                                               | SYBU                                  | 1,20 |

|                                                                                                  |                         |      |
|--------------------------------------------------------------------------------------------------|-------------------------|------|
| serpin peptidase inhibitor, clade A (alpha-1 antiproteinase, antitrypsin), member 13, pseudogene | SERPINA13P              | 1,20 |
| double homeobox 4 like 7                                                                         | DUX4L7                  | 1,20 |
| neuroligin 1                                                                                     | NLGN1                   | 1,20 |
| AT rich interactive domain 4B (RBP1-like)                                                        | ARID4B                  | 1,20 |
| leucine rich repeat containing 37, member A3                                                     | LRRC37A3                | 1,20 |
| H3 histone, family 3C                                                                            | H3F3C                   | 1,20 |
| chromosome 17 open reading frame 112                                                             | C17orf112               | 1,20 |
| S-antigen; retina and pineal gland (arrestin)                                                    | SAG                     | 1,20 |
| carbamoyl-phosphate synthase 1                                                                   | CPS1                    | 1,20 |
| uroplakin 3B-like; polymerase (RNA) II (DNA directed) polypeptide J2                             | UPK3BL; POLR2J2         | 1,20 |
| kizuna centrosomal protein                                                                       | KIZ                     | 1,20 |
| annexin A10                                                                                      | ANXA10                  | 1,20 |
| Meis homeobox 3                                                                                  | MEIS3                   | 1,20 |
| ankyrin repeat and EF-hand domain containing 1                                                   | ANKEF1                  | 1,20 |
| ELOVL fatty acid elongase 7                                                                      | ELOVL7                  | 1,20 |
| variable charge, Y-linked 1B                                                                     | VCY1B                   | 1,20 |
| CCR4-NOT transcription complex subunit 7                                                         | CNOT7                   | 1,20 |
| GIN5 complex subunit 1 (Psf1 homolog)                                                            | GIN5                    | 1,20 |
| leucine rich repeat containing 9                                                                 | LRRC9                   | 1,20 |
| transportin 1                                                                                    | TNPO1                   | 1,20 |
| MARVEL domain containing 2                                                                       | MARVELD2                | 1,20 |
| ankyrin repeat domain 33B                                                                        | ANKRD33B                | 1,20 |
| keratin 73, type II                                                                              | KRT73                   | 1,20 |
| solute carrier family 38, member 9                                                               | SLC38A9                 | 1,20 |
| olfactory receptor, family 10, subfamily H, member 2                                             | OR10H2                  | 1,20 |
| DNA replication and sister chromatid cohesion 1                                                  | DSCC1                   | 1,20 |
| fragile X mental retardation, autosomal homolog 2                                                | FXR2                    | 1,20 |
| tubulin, beta class I                                                                            | TUBB                    | 1,20 |
| olfactory receptor, family 5, subfamily AK, member 2                                             | OR5AK2                  | 1,20 |
|                                                                                                  | AC208162.1              | 1,20 |
| keratin 81, type II                                                                              | KRT81                   | 1,20 |
| CD96 molecule                                                                                    | CD96                    | 1,20 |
| homeobox B8                                                                                      | HOXB8                   | 1,20 |
| keratin 8, type II                                                                               | KRT8                    | 1,20 |
| diphthamide biosynthesis 7                                                                       | DPH7                    | 1,20 |
| Transcript Identified by AceView, Entrez Gene ID(s) 64327                                        | LMBR1                   | 1,20 |
| uncharacterized LOC730159; putative novel transcript                                             | LOC730159; RP11-360D2.1 | 1,20 |
| BUB3 mitotic checkpoint protein                                                                  | BUB3                    | 1,20 |
| LIM domain binding 2                                                                             | LDB2                    | 1,20 |
| ubiquitin conjugating enzyme E2L 3                                                               | UBE2L3                  | 1,20 |



|                                                                                                 |                                                       |      |
|-------------------------------------------------------------------------------------------------|-------------------------------------------------------|------|
| amyloid beta (A4) precursor protein-binding, family B, member 1 interacting protein             | APBB1IP                                               | 1,20 |
| fibroblast growth factor 2 (basic)                                                              | FGF2                                                  | 1,20 |
| solute carrier family 16 (monocarboxylate transporter), member 1                                | SLC16A1                                               | 1,20 |
| LanC lantibiotic synthetase component C-like 1 (bacterial)                                      | LANCL1                                                | 1,20 |
| atypical chemokine receptor 2                                                                   | ACKR2                                                 | 1,20 |
| SAM domain, SH3 domain and nuclear localization signals 1                                       | SAMSN1                                                | 1,20 |
| zinc finger protein 25                                                                          | ZNF25                                                 | 1,20 |
| ubiquitin protein ligase E3 component n-recogin 5                                               | UBR5                                                  | 1,20 |
| stabilin 1                                                                                      | STAB1                                                 | 1,20 |
| discoidin domain receptor tyrosine kinase 1; microRNA 4640                                      | DDR1; MIR4640                                         | 1,20 |
| coronin, actin binding protein, 1C                                                              | CORO1C                                                | 1,20 |
| WD repeat domain 87                                                                             | WDR87                                                 | 1,20 |
| tropomyosin 1 (alpha)                                                                           | TPM1                                                  | 1,20 |
| homeobox A10; homeobox A9; microRNA 196b                                                        | HOXA10; HOXA9; MIR196B                                | 1,20 |
| polymerase (DNA directed), epsilon 3, accessory subunit                                         | POLE3                                                 | 1,20 |
| MIR1-1 host gene; microRNA 133a-2                                                               | MIR1-1HG; MIR133A2                                    | 1,20 |
| zinc finger protein 35                                                                          | ZNF35                                                 | 1,20 |
| troponin I type 3 (cardiac)                                                                     | TNNI3                                                 | 1,20 |
| Fc receptor-like B                                                                              | FCRLB                                                 | 1,20 |
| transcription factor 20 (AR1)                                                                   | TCF20                                                 | 1,20 |
| tumor necrosis factor receptor superfamily, member 13C; microRNA 378i                           | TNFRSF13C; MIR378I                                    | 1,20 |
| ectonucleoside triphosphate diphosphohydrolase 1                                                | ENTPD1                                                | 1,20 |
| mitochondrial ribosomal protein L49                                                             | MRPL49                                                | 1,20 |
| OCIA domain containing 1                                                                        | OCIAD1                                                | 1,20 |
| G antigen 2D; G antigen 13; G antigen 2E; G antigen 8; G antigen 2B; G antigen 2A; G antigen 2C | GAGE2D; GAGE13; GAGE2E; GAGE8; GAGE2B; GAGE2A; GAGE2C | 1,20 |
| male-enhanced antigen 1                                                                         | MEA1                                                  | 1,20 |
| collagen, type IV, alpha 3 (Goodpasture antigen)                                                | COL4A3                                                | 1,20 |
| phosphorylated adaptor for RNA export                                                           | PHAX                                                  | 1,20 |
| zinc finger protein 169                                                                         | ZNF169                                                | 1,20 |
| NIP7, nucleolar pre-rRNA processing protein                                                     | NIP7                                                  | 1,20 |
| PWP1 homolog, endonuclein                                                                       | PWP1                                                  | 1,20 |

|                                                                                                                                                                                                                                                                                                                            |                                    |      |
|----------------------------------------------------------------------------------------------------------------------------------------------------------------------------------------------------------------------------------------------------------------------------------------------------------------------------|------------------------------------|------|
| T-cell leukemia/lymphoma 1B; T-cell leukemia/lymphoma 6 (non-protein coding)                                                                                                                                                                                                                                               | TCL1B; TCL6                        | 1,20 |
| tripartite motif containing 33                                                                                                                                                                                                                                                                                             | TRIM33                             | 1,20 |
| catsper channel auxiliary subunit delta                                                                                                                                                                                                                                                                                    | CATSPERD                           | 1,20 |
| CCR4-NOT transcription complex subunit 6                                                                                                                                                                                                                                                                                   | CNOT6                              | 1,20 |
| Memczak2013 ALT_ACCEPTOR, ALT_DONOR, coding, INTERNAL, intronic best transcript NM_201998                                                                                                                                                                                                                                  | SF1                                | 1,20 |
| peptidyl-tRNA hydrolase 1 homolog                                                                                                                                                                                                                                                                                          | PTRH1                              | 1,20 |
| tubulointerstitial nephritis antigen                                                                                                                                                                                                                                                                                       | TINAG                              | 1,20 |
| outer dense fiber of sperm tails 2-like                                                                                                                                                                                                                                                                                    | ODF2L                              | 1,20 |
| frizzled class receptor 1                                                                                                                                                                                                                                                                                                  | FZD1                               | 1,20 |
| lymphoid-restricted membrane protein                                                                                                                                                                                                                                                                                       | LRMP                               | 1,20 |
| Homo sapiens REX1, RNA exonuclease 1 homolog-like 2, pseudogene (REXO1L2P), non-coding RNA.; Synthetic construct Homo sapiens clone IMAGE:100068172, MGC:195789 REX1, RNA exonuclease 1 homolog (S. cerevisiae)-like 1 (REXO1L1) mRNA, encodes complete protein.; Transcript Identified by AceView, RefSeq ID(s) NR_003594 | REXO1L2P;<br>REXO1L1;<br>blarbeyby | 1,20 |
| integrin alpha X                                                                                                                                                                                                                                                                                                           | ITGAX                              | 1,20 |
| endoplasmic reticulum to nucleus signaling 1                                                                                                                                                                                                                                                                               | ERN1                               | 1,20 |
| helicase, POLQ-like                                                                                                                                                                                                                                                                                                        | HELQ                               | 1,20 |
| guanylate cyclase activator 2A (guanylin)                                                                                                                                                                                                                                                                                  | GUCA2A                             | 1,20 |
| catenin (cadherin-associated protein), alpha-like 1                                                                                                                                                                                                                                                                        | CTNNAL1                            | 1,20 |
| thiosulfate sulfurtransferase (rhodanese)-like domain containing 3                                                                                                                                                                                                                                                         | TSTD3                              | 1,20 |
| Tctex1 domain containing 1                                                                                                                                                                                                                                                                                                 | TCTEX1D1                           | 1,20 |
| Memczak2013 ANTISENSE, CDS, coding, INTERNAL best transcript NM_017607                                                                                                                                                                                                                                                     | PPP1R12C                           | 1,20 |
| cadherin 10, type 2 (T2-cadherin)                                                                                                                                                                                                                                                                                          | CDH10                              | 1,20 |
| MT-RNR2-like 2                                                                                                                                                                                                                                                                                                             | MTRNR2L2                           | 1,20 |
| peptidoglycan recognition protein 1                                                                                                                                                                                                                                                                                        | PGLYRP1                            | 1,20 |
| heterogeneous nuclear ribonucleoprotein A/B                                                                                                                                                                                                                                                                                | HNRNPAB                            | 1,20 |
| Memczak2013 ALT_ACCEPTOR, ALT_DONOR, coding, INTERNAL, intronic best transcript NM_000332                                                                                                                                                                                                                                  | ATXN1                              | 1,20 |
| tRNA methyltransferase 61A                                                                                                                                                                                                                                                                                                 | TRMT61A                            | 1,20 |
| cytochrome P450, family 4, subfamily F, polypeptide 8                                                                                                                                                                                                                                                                      | CYP4F8                             | 1,20 |
| adenine phosphoribosyltransferase                                                                                                                                                                                                                                                                                          | APRT                               | 1,20 |
| Transcript Identified by AceView, Entrez Gene ID(s) 79875                                                                                                                                                                                                                                                                  | THSD4                              | 1,20 |
| mitochondrial ribosomal protein S15                                                                                                                                                                                                                                                                                        | MRPS15                             | 1,20 |
| DnaJ (Hsp40) homolog, subfamily B, member 11                                                                                                                                                                                                                                                                               | DNAJB11                            | 1,20 |
| R-spondin 2                                                                                                                                                                                                                                                                                                                | RSPO2                              | 1,20 |
| odorant binding protein 2B                                                                                                                                                                                                                                                                                                 | OBP2B                              | 1,20 |
| polycystic kidney disease 2-like 1                                                                                                                                                                                                                                                                                         | PKD2L1                             | 1,19 |

|                                                                                                   |                 |      |
|---------------------------------------------------------------------------------------------------|-----------------|------|
| transducin-like enhancer of split 1 (E(sp1) homolog, Drosophila)                                  | TLE1            | 1,19 |
| Memczak2013 ALT_DONOR, coding, INTERNAL, intronic best transcript NM_001080437                    | SNED1           | 1,19 |
| zinc finger and BTB domain containing 18                                                          | ZBTB18          | 1,19 |
| regulator of G-protein signaling 11                                                               | RGS11           | 1,19 |
| neurexophilin 3                                                                                   | NXPH3           | 1,19 |
| gremlin 2, DAN family BMP antagonist                                                              | GREM2           | 1,19 |
| transportin 2                                                                                     | TNPO2           | 1,19 |
| solute carrier family 37, member 3                                                                | SLC37A3         | 1,19 |
| PRAME family member 14                                                                            | PRAMEF14        | 1,19 |
| programmed cell death 2-like                                                                      | PDCD2L          | 1,19 |
| TANK-binding kinase 1                                                                             | TBK1            | 1,19 |
| PDZK1 interacting protein 1                                                                       | PDZK1IP1        | 1,19 |
| olfactory receptor, family 4, subfamily C, member 45                                              | OR4C45          | 1,19 |
| zinc finger protein 726; zinc finger protein 92 pseudogene 3                                      | ZNF726; ZNF92P3 | 1,19 |
| NOBOX oogenesis homeobox                                                                          | NOBOX           | 1,19 |
| peroxisomal, testis specific 1                                                                    | PXT1            | 1,19 |
| LanC lantibiotic synthetase component C-like 3 (bacterial)                                        | LANCL3          | 1,19 |
| Transcript Identified by AceView, Entrez Gene ID(s) 54453                                         | RIN2            | 1,19 |
| complement factor properdin                                                                       | CFP             | 1,19 |
| SWI/SNF related, matrix associated, actin dependent regulator of chromatin, subfamily a, member 4 | SMARCA4         | 1,19 |
| SNW domain containing 1                                                                           | SNW1            | 1,19 |
| proprotein convertase subtilisin/kexin type 2                                                     | PCSK2           | 1,19 |
| homeodomain interacting protein kinase 1                                                          | HIPK1           | 1,19 |
| coiled-coil domain containing 42                                                                  | CCDC42          | 1,19 |
| NADH dehydrogenase (ubiquinone) 1 alpha subcomplex, 12                                            | NDUFA12         | 1,19 |
| calcitonin receptor like receptor                                                                 | CALCRL          | 1,19 |
| p53 and DNA-damage regulated 1                                                                    | PDRG1           | 1,19 |
| cyclin-dependent kinase 4                                                                         | CDK4            | 1,19 |
| dynein, light chain, Tctex-type 3                                                                 | DYNLT3          | 1,19 |
| autophagy related 16-like 1                                                                       | ATG16L1         | 1,19 |
| forkhead box Q1                                                                                   | FOXQ1           | 1,19 |
| cysteine-serine-rich nuclear protein 3                                                            | CSRNP3          | 1,19 |
| Transcript Identified by AceView, Entrez Gene ID(s) 116154                                        | PHACTR3         | 1,19 |
| TBC1 domain family, member 22A                                                                    | TBC1D22A        | 1,19 |
| ribosomal RNA adenine dimethylase domain containing 1                                             | RRNAD1          | 1,19 |
| ubiquitin conjugating enzyme E2 variant 1                                                         | UBE2V1          | 1,19 |

|                                                               |           |      |
|---------------------------------------------------------------|-----------|------|
| monooxygenase, DBH-like 1                                     | MOXD1     | 1,19 |
| hypoxia inducible factor 1, alpha subunit inhibitor           | HIF1AN    | 1,19 |
| patched domain containing 2                                   | PTCHD2    | 1,19 |
| defensin, beta 136                                            | DEFB136   | 1,19 |
| FCF1 rRNA-processing protein                                  | FCF1      | 1,19 |
| NLR family, pyrin domain containing 9                         | NLRP9     | 1,19 |
| formin 1                                                      | FMN1      | 1,19 |
| zinc finger protein 283                                       | ZNF283    | 1,19 |
| DnaJ (Hsp40) homolog, subfamily C, member 7                   | DNAJC7    | 1,19 |
| transmembrane protein 182                                     | TMEM182   | 1,19 |
| unc-5 netrin receptor A                                       | UNC5A     | 1,19 |
| OTU deubiquitinase 3                                          | OTUD3     | 1,19 |
| BTB (POZ) domain containing 11                                | BTBD11    | 1,19 |
| short chain dehydrogenase/reductase family 42E,<br>member 2   | SDR42E2   | 1,19 |
| surfactant protein D                                          | SFTPD     | 1,19 |
| cytochrome P450, family 2, subfamily E, polypeptide 1         | CYP2E1    | 1,19 |
| transcription factor EC                                       | TFEC      | 1,19 |
| coiled-coil domain containing 103                             | CCDC103   | 1,19 |
| iduronidase, alpha-L-                                         | IDUA      | 1,19 |
| chloride channel, voltage-sensitive Ka                        | CLCNKA    | 1,19 |
| chromosome 10 open reading frame 88                           | C10orf88  | 1,19 |
| pumilio RNA binding family member 3                           | PUM3      | 1,19 |
| MAD1 mitotic arrest deficient-like 1 (yeast)                  | MAD1L1    | 1,19 |
| MAK16 homolog                                                 | MAK16     | 1,19 |
| keratin associated protein 10-2                               | KRTAP10-2 | 1,19 |
| ATP binding cassette subfamily B member 5                     | ABCB5     | 1,19 |
| proline-rich protein BstNI subfamily 4                        | PRB4      | 1,19 |
| chromosome 14 open reading frame 180                          | C14orf180 | 1,19 |
| calmodulin 1 (phosphorylase kinase, delta)                    | CALM1     | 1,19 |
| actin filament associated protein 1-like 2                    | AFAP1L2   | 1,19 |
| G protein-coupled receptor 135                                | GPR135    | 1,19 |
| 3-oxoacid CoA-transferase 2                                   | OXCT2     | 1,19 |
| desmocollin 3                                                 | DSC3      | 1,19 |
| Transcript Identified by AceView, Entrez Gene ID(s)<br>143279 | HECTD2    | 1,19 |
| chromosome 10 open reading frame 12                           | C10orf12  | 1,19 |
| TIMELESS interacting protein                                  | TIPIN     | 1,19 |
| microtubule crosslinking factor 1                             | MTCL1     | 1,19 |
| leucine rich repeat containing 42                             | LRRC42    | 1,19 |
| myotubularin related protein 2                                | MTMR2     | 1,19 |
| cathepsin V                                                   | CTSV      | 1,19 |
| heparan sulfate 6-O-sulfotransferase 2                        | HS6ST2    | 1,19 |
| proenkephalin                                                 | PENK      | 1,19 |
| transmembrane protein 251                                     | TMEM251   | 1,19 |

|                                                                                                                                 |                         |      |
|---------------------------------------------------------------------------------------------------------------------------------|-------------------------|------|
| eukaryotic translation elongation factor 1 alpha 2                                                                              | EEF1A2                  | 1,19 |
| zinc finger and BTB domain containing 11                                                                                        | ZBTB11                  | 1,19 |
| cadherin 11, type 2, OB-cadherin (osteoblast)                                                                                   | CDH11                   | 1,19 |
| defensin, alpha 4, corticostatin                                                                                                | DEFA4                   | 1,19 |
| rabaptin, RAB GTPase binding effector protein 1                                                                                 | RABEP1                  | 1,19 |
| defensin, beta 106A                                                                                                             | DEFB106A                | 1,19 |
| kinesin family member 1B                                                                                                        | KIF1B                   | 1,19 |
| uncharacterized LOC340074; Transcript Identified by AceView, Entrez Gene ID(s) 340074, RefSeq ID(s) NR_027127; novel transcript | LOC340074; CTC-321K16.4 | 1,19 |
| kelch-like family member 31                                                                                                     | KLHL31                  | 1,19 |
| Memczak2013 ANTISENSE, coding, INTERNAL, intronic best transcript NM_032131                                                     | ARMC2                   | 1,19 |
| C1q and tumor necrosis factor related protein 5; membrane frizzled-related protein                                              | C1QTNF5; MFRP           | 1,19 |
| zinc finger protein 843                                                                                                         | ZNF843                  | 1,19 |
| Fas (TNFRSF6) associated factor 1                                                                                               | FAF1                    | 1,19 |
| short chain dehydrogenase/reductase family 42E, member 1                                                                        | SDR42E1                 | 1,19 |
| mucin 2, oligomeric mucus/gel-forming                                                                                           | MUC2                    | 1,19 |
| HD domain containing 2                                                                                                          | HDDC2                   | 1,19 |
| t-complex 1; small nucleolar RNA, H/ACA box 20; small nucleolar RNA, H/ACA box 29                                               | TCP1; SNORA20; SNORA29  | 1,19 |
| phosphodiesterase 6H, cGMP-specific, cone, gamma                                                                                | PDE6H                   | 1,19 |
| FAT atypical cadherin 3                                                                                                         | FAT3                    | 1,19 |
| sosondowah ankyrin repeat domain family member B                                                                                | SOWAHB                  | 1,19 |
| HERV-H LTR-associating 2                                                                                                        | HHLA2                   | 1,19 |
| apolipoprotein B mRNA editing enzyme, catalytic polypeptide-like 3A                                                             | APOBEC3A                | 1,19 |
| interferon-induced protein with tetratricopeptide repeats 1B                                                                    | IFIT1B                  | 1,19 |
| bestrophin 1                                                                                                                    | BEST1                   | 1,19 |
| O-sialoglycoprotein endopeptidase                                                                                               | OSGEP                   | 1,19 |
| cramped chromatin regulator homolog 1                                                                                           | CRAMP1                  | 1,19 |
| small proline-rich protein 2B                                                                                                   | SPRR2B                  | 1,19 |
| GDP-D-glucose phosphorylase 1                                                                                                   | GDPGP1                  | 1,19 |
| zinc finger and BTB domain containing 38                                                                                        | ZBTB38                  | 1,19 |
| spindlin family, member 2A                                                                                                      | SPIN2A                  | 1,19 |
| plexin D1                                                                                                                       | PLXND1                  | 1,19 |
| CWC25 spliceosome-associated protein homolog                                                                                    | CWC25                   | 1,19 |
| zinc finger protein 141                                                                                                         | ZNF141                  | 1,19 |
| chromosome 14 open reading frame 119                                                                                            | C14orf119               | 1,19 |
| ALS2 C-terminal like                                                                                                            | ALS2CL                  | 1,19 |
| long intergenic non-protein coding RNA 504                                                                                      | LINC00504               | 1,19 |
| programmed cell death 5                                                                                                         | PDCD5                   | 1,19 |

|                                                                        |          |      |
|------------------------------------------------------------------------|----------|------|
| keratin 36, type I                                                     | KRT36    | 1,19 |
| chromosome 11 open reading frame 72                                    | C11orf72 | 1,19 |
| bicaudal D homolog 1 (Drosophila)                                      | BICD1    | 1,19 |
| solute carrier family 18 (vesicular monoamine transporter), member 2   | SLC18A2  | 1,19 |
| PIH1 domain containing 3                                               | PIH1D3   | 1,19 |
| prostaglandin E synthase                                               | PTGES    | 1,19 |
| glutamate receptor, ionotropic, kainate 1                              | GRIK1    | 1,19 |
| transmembrane BAX inhibitor motif containing 6                         | TMBIM6   | 1,19 |
| ring finger protein 144B                                               | RNF144B  | 1,19 |
| R-spondin 3                                                            | RSPO3    | 1,19 |
| X-linked Kx blood group related 3                                      | XKR3     | 1,19 |
| URB2 ribosome biogenesis 2 homolog (S. cerevisiae)                     | URB2     | 1,19 |
| uromodulin                                                             | UMOD     | 1,19 |
| SRC proto-oncogene, non-receptor tyrosine kinase                       | SRC      | 1,18 |
| chloride channel, voltage-sensitive 5                                  | CLCN5    | 1,18 |
| chromosome 16 open reading frame 74                                    | C16orf74 | 1,18 |
| thioesterase superfamily member 4                                      | THEM4    | 1,18 |
| histidyl-tRNA synthetase                                               | HARS     | 1,18 |
| ribosomal RNA processing 12 homolog                                    | RRP12    | 1,18 |
| DEAD (Asp-Glu-Ala-Asp) box polypeptide 58                              | DDX58    | 1,18 |
| golgi-associated, gamma adaptin ear containing, ARF binding protein 1  | GGA1     | 1,18 |
| stabilizer of axonemal microtubules 2                                  | SAXO2    | 1,18 |
| inhibitor of DNA binding 4, dominant negative helix-loop-helix protein | ID4      | 1,18 |
| cyclin O                                                               | CCNO     | 1,18 |
| histone cluster 1, H1t                                                 | HIST1H1T | 1,18 |
| achalasia, adrenocortical insufficiency, alacrimia                     | AAAS     | 1,18 |
| ankyrin repeat and SOCS box containing 17                              | ASB17    | 1,18 |
| recoverin                                                              | RCVRN    | 1,18 |
| N(alpha)-acetyltransferase 35, NatC auxiliary subunit                  | NAA35    | 1,18 |
| chromosome 11 open reading frame 63                                    | C11orf63 | 1,18 |
| olfactory receptor, family 8, subfamily B, member 12                   | OR8B12   | 1,18 |
| myelin protein zero                                                    | MPZ      | 1,18 |
| Transcript Identified by AceView, Entrez Gene ID(s) 50804              | MYEF2    | 1,18 |
| notochord homeobox                                                     | NOTO     | 1,18 |
| phosducin                                                              | PDC      | 1,18 |
| major facilitator superfamily domain containing 7                      | MFSD7    | 1,18 |
| ATPase, Ca++ transporting, type 2C, member 2                           | ATP2C2   | 1,18 |
| nucleolar and coiled-body phosphoprotein 1                             | NOLC1    | 1,18 |
| poly(A) polymerase alpha                                               | PAPOLA   | 1,18 |
| Transcript Identified by AceView, Entrez Gene ID(s) 5136               | PDE1A    | 1,18 |

|                                                                                                              |                               |      |
|--------------------------------------------------------------------------------------------------------------|-------------------------------|------|
| Tctex1 domain containing 2                                                                                   | TCTEX1D2                      | 1,18 |
| myosin binding protein C, fast type                                                                          | MYBPC2                        | 1,18 |
| free fatty acid receptor 1                                                                                   | FFAR1                         | 1,18 |
| olfactomedin 1                                                                                               | OLFM1                         | 1,18 |
| vesicle associated membrane protein 3                                                                        | VAMP3                         | 1,18 |
| A kinase (PRKA) anchor protein 8-like                                                                        | AKAP8L                        | 1,18 |
| E2F transcription factor 4, p107/p130-binding                                                                | E2F4                          | 1,18 |
| MAM domain containing 2                                                                                      | MAMDC2                        | 1,18 |
| acetylserotonin O-methyltransferase-like                                                                     | ASMTL                         | 1,18 |
| acetylserotonin O-methyltransferase-like                                                                     | ASMTL                         | 1,18 |
| wingless-type MMTV integration site family, member 9B                                                        | WNT9B                         | 1,18 |
| calcium channel, voltage-dependent, T type, alpha 1I subunit                                                 | CACNA1I                       | 1,18 |
| insulin-like 4 (placenta)                                                                                    | INSL4                         | 1,18 |
| family with sequence similarity 98, member B                                                                 | FAM98B                        | 1,18 |
| coenzyme Q10B                                                                                                | COQ10B                        | 1,18 |
| nischarin                                                                                                    | NISCH                         | 1,18 |
| polymerase (DNA directed), beta                                                                              | POLB                          | 1,18 |
| ankyrin repeat domain 2 (stretch responsive muscle)                                                          | ANKRD2                        | 1,18 |
| CD79b molecule, immunoglobulin-associated beta                                                               | CD79B                         | 1,18 |
| chromosome 10 open reading frame 35                                                                          | C10orf35                      | 1,18 |
| serpin peptidase inhibitor, clade B (ovalbumin), member 4                                                    | SERPINB4                      | 1,18 |
| lon peptidase 1, mitochondrial                                                                               | LONP1                         | 1,18 |
| carboxypeptidase A5                                                                                          | CPA5                          | 1,18 |
| TBC1 domain family, member 7                                                                                 | TBC1D7                        | 1,18 |
| diacylglycerol kinase, eta                                                                                   | DGKH                          | 1,18 |
| olfactory receptor, family 2, subfamily A, member 42;<br>olfactory receptor, family 2, subfamily A, member 1 | OR2A42; OR2A1                 | 1,18 |
| transmembrane 4 L six family member 4                                                                        | TM4SF4                        | 1,18 |
| keratin 71, type II                                                                                          | KRT71                         | 1,18 |
| uncharacterized LOC101927322; novel transcript,<br>antisense to MALT1                                        | LOC101927322;<br>RP11-126O1.5 | 1,18 |
| erythrocyte membrane protein band 4.1                                                                        | EPB41                         | 1,18 |
| solute carrier family 24 (sodium/potassium/calcium<br>exchanger), member 4                                   | SLC24A4                       | 1,18 |
| topoisomerase (DNA) III beta                                                                                 | TOP3B                         | 1,18 |
| CTP synthase 1                                                                                               | CTPS1                         | 1,18 |
| golgin A8 family, member D, pseudogene                                                                       | GOLGA8DP                      | 1,18 |
| golgin A6 family-like 10                                                                                     | GOLGA6L10                     | 1,18 |
| DC-STAMP domain containing 2                                                                                 | DCST2                         | 1,18 |
| ankyrin repeat and MYND domain containing 1                                                                  | ANKMY1                        | 1,18 |
| huntingtin interacting protein 1                                                                             | HIP1                          | 1,18 |

|                                                                                                         |           |      |
|---------------------------------------------------------------------------------------------------------|-----------|------|
| Transcript Identified by AceView, Entrez Gene ID(s)<br>642812                                           | API5L1    | 1,18 |
| proline-rich protein BstNI subfamily 3                                                                  | PRB3      | 1,18 |
| DC-STAMP domain containing 1                                                                            | DCST1     | 1,18 |
| LAS1-like, ribosome biogenesis factor                                                                   | LAS1L     | 1,18 |
| G protein-coupled receptor kinase 4                                                                     | GRK4      | 1,18 |
| COX10 heme A:farnesyltransferase cytochrome c oxidase<br>assembly factor                                | COX10     | 1,18 |
| Eukaryotic translation initiation factor 3 subunit F<br>[Source:UniProtKB/Swiss-Prot;Acc:O00303]        | EIF3F     | 1,18 |
| reticulocalbin 1, EF-hand calcium binding domain                                                        | RCN1      | 1,18 |
| cyclin-dependent kinase 7                                                                               | CDK7      | 1,18 |
| sodium channel, voltage gated, type III beta subunit                                                    | SCN3B     | 1,18 |
| squamous cell carcinoma antigen recognized by T-cells 3                                                 | SART3     | 1,18 |
| integrin alpha V                                                                                        | ITGAV     | 1,18 |
| heat shock transcription factor family, X-linked 1                                                      | HSFX1     | 1,18 |
| claudin 22                                                                                              | CLDN22    | 1,18 |
| chromosome 18 open reading frame 63                                                                     | C18orf63  | 1,18 |
| unc-79 homolog (C. elegans)                                                                             | UNC79     | 1,18 |
| pleckstrin homology-like domain, family B, member 3                                                     | PHLDB3    | 1,18 |
| ras homolog family member A                                                                             | RHOA      | 1,18 |
| nuclear factor of kappa light polypeptide gene enhancer<br>in B-cells inhibitor, beta                   | NFKBIB    | 1,18 |
| CCR4-NOT transcription complex subunit 4                                                                | CNOT4     | 1,18 |
| long intergenic non-protein coding RNA 1272                                                             | LINC01272 | 1,18 |
| endonuclease, polyU-specific                                                                            | ENDOU     | 1,18 |
| X antigen family, member 5                                                                              | XAGE5     | 1,18 |
| Fli-1 proto-oncogene, ETS transcription factor                                                          | FLI1      | 1,18 |
| profilin 1                                                                                              | PFN1      | 1,18 |
| POM121 transmembrane nucleoporin-like 2                                                                 | POM121L2  | 1,18 |
| aftiphilin                                                                                              | AFTPH     | 1,18 |
| SIX homeobox 4                                                                                          | SIX4      | 1,18 |
| RAB23, member RAS oncogene family                                                                       | RAB23     | 1,18 |
| synapse associated protein 1                                                                            | SYAP1     | 1,18 |
| DnaJ (Hsp40) homolog, subfamily C, member 8                                                             | DNAJC8    | 1,18 |
| peroxidasin                                                                                             | PXDN      | 1,18 |
| T-cell activation RhoGTPase activating protein                                                          | TAGAP     | 1,18 |
| family with sequence similarity 135, member B                                                           | FAM135B   | 1,18 |
| glutamate receptor, ionotropic, kainate 4                                                               | GRIK4     | 1,18 |
| coiled-coil-helix-coiled-coil-helix domain containing 2                                                 | CHCHD2    | 1,18 |
| Homo sapiens LSM12 homolog (S. cerevisiae), mRNA<br>(cDNA clone MGC:57206 IMAGE:4794614), complete cds. | LSM12     | 1,18 |
| ubiquitin specific peptidase 20                                                                         | USP20     | 1,18 |



|                                                                                          |         |      |
|------------------------------------------------------------------------------------------|---------|------|
| Memczak2013 ANTISENSE, coding, INTERNAL, UTR3 best transcript NM_080677                  | DYNLL2  | 1,18 |
| death associated protein 3                                                               | DAP3    | 1,18 |
| olfactory receptor, family 10, subfamily H, member 3                                     | OR10H3  | 1,18 |
| zinc finger protein 23                                                                   | ZNF23   | 1,18 |
| collagen, type V, alpha 1                                                                | COL5A1  | 1,18 |
| ferredoxin-fold anticodon binding domain containing 1                                    | FDXACB1 | 1,18 |
| ATPase family, AAA domain containing 1                                                   | ATAD1   | 1,18 |
| nuclear receptor subfamily 2, group E, member 1                                          | NR2E1   | 1,18 |
| lysine (K)-specific demethylase 5C                                                       | KDM5C   | 1,18 |
| membrane associated ring finger 6                                                        | MARCH6  | 1,18 |
| leukocyte immunoglobulin-like receptor, subfamily B (with TM and ITIM domains), member 4 | LILRB4  | 1,18 |
| nemo-like kinase                                                                         | NLK     | 1,18 |
| angiopoietin like 5                                                                      | ANGPTL5 | 1,18 |
| creatine kinase, mitochondrial 2 (sarcomeric)                                            | CKMT2   | 1,18 |
| protease, serine 36                                                                      | PRSS36  | 1,18 |
| chemokine (C-C motif) ligand 8                                                           | CCL8    | 1,18 |
| H1 histone family, member N, testis-specific                                             | H1FNT   | 1,18 |
| late cornified envelope 3D                                                               | LCE3D   | 1,18 |
| mediator complex subunit 6                                                               | MED6    | 1,18 |
| polymerase (DNA directed), gamma                                                         | POLG    | 1,18 |
| wingless-type MMTV integration site family, member 5B                                    | WNT5B   | 1,18 |
| DDB1 and CUL4 associated factor 17                                                       | DCAF17  | 1,18 |
| centrosomal protein 83kDa                                                                | CEP83   | 1,18 |
| Spi-B transcription factor (Spi-1/PU.1 related)                                          | SPIB    | 1,18 |
| coiled-coil domain containing 6                                                          | CCDC6   | 1,18 |
| inositol polyphosphate-5-phosphatase D                                                   | INPP5D  | 1,18 |
| major histocompatibility complex, class II, DM beta                                      | HLA-DMB | 1,18 |
| 3-oxoacyl-ACP synthase, mitochondrial                                                    | OXSM    | 1,18 |
| G protein-coupled receptor 65                                                            | GPR65   | 1,18 |
| ORMDL sphingolipid biosynthesis regulator 1                                              | ORMDL1  | 1,18 |
| CD19 molecule                                                                            | CD19    | 1,18 |
| arginine/serine-rich coiled-coil 1                                                       | RSRC1   | 1,18 |
| epididymal protein 3B                                                                    | EDDM3B  | 1,18 |
| zinc finger with UFM1-specific peptidase domain                                          | ZUFSP   | 1,18 |
| cytochrome P450, family 4, subfamily F, polypeptide 3                                    | CYP4F3  | 1,18 |
| O-sialoglycoprotein endopeptidase-like 1                                                 | OSGEPL1 | 1,18 |
| unc-51 like kinase 3                                                                     | ULK3    | 1,18 |
| retinoblastoma binding protein 6                                                         | RBBP6   | 1,18 |
| dual specificity phosphatase 11                                                          | DUSP11  | 1,18 |
| family with sequence similarity 83, member A                                             | FAM83A  | 1,18 |
| salt-inducible kinase 1                                                                  | SIK1    | 1,18 |
| trafficking protein particle complex 4                                                   | TRAPPC4 | 1,18 |

|                                                                                                                                                                                      |                               |      |
|--------------------------------------------------------------------------------------------------------------------------------------------------------------------------------------|-------------------------------|------|
| guanine nucleotide binding protein (G protein), beta polypeptide 2                                                                                                                   | GNB2                          | 1,18 |
| ABI family, member 3 (NESH) binding protein                                                                                                                                          | ABI3BP                        | 1,18 |
| myosin light chain 2                                                                                                                                                                 | MYL2                          | 1,18 |
| G protein-coupled receptor 137C                                                                                                                                                      | GPR137C                       | 1,18 |
| solute carrier family 6 (neutral amino acid transporter), member 15                                                                                                                  | SLC6A15                       | 1,18 |
| neuropeptide Y receptor Y1                                                                                                                                                           | NPY1R                         | 1,18 |
| uncharacterized LOC388882; novel transcript                                                                                                                                          | LOC388882;<br>AP000345.1      | 1,18 |
| NADH dehydrogenase (ubiquinone) 1 alpha subcomplex, 10, 42kDa                                                                                                                        | NDUFA10                       | 1,18 |
| family with sequence similarity 227, member B                                                                                                                                        | FAM227B                       | 1,18 |
| Transcript Identified by AceView, Entrez Gene ID(s) 84256                                                                                                                            | FLYWCH1                       | 1,18 |
| regulator of microtubule dynamics 1                                                                                                                                                  | RMDN1                         | 1,18 |
| RB1-inducible coiled-coil 1                                                                                                                                                          | RB1CC1                        | 1,18 |
| inhibitor of growth family member 2                                                                                                                                                  | ING2                          | 1,18 |
| polypeptide N-acetylgalactosaminyltransferase-like 5                                                                                                                                 | GALNTL5                       | 1,18 |
| poly(ADP-ribose) polymerase family member 8                                                                                                                                          | PARP8                         | 1,18 |
| ribosomal protein L7-like 1                                                                                                                                                          | RPL7L1                        | 1,18 |
| leukocyte specific transcript 1                                                                                                                                                      | LST1                          | 1,18 |
| microfibrillar associated protein 3                                                                                                                                                  | MFAP3                         | 1,18 |
| deleted in azoospermia 2; deleted in azoospermia 3                                                                                                                                   | DAZ2; DAZ3                    | 1,18 |
| store-operated calcium entry-associated regulatory factor                                                                                                                            | SARAF                         | 1,18 |
| WD repeat domain 62                                                                                                                                                                  | WDR62                         | 1,18 |
| protein-L-isoaspartate (D-aspartate) O-methyltransferase                                                                                                                             | PCMT1                         | 1,18 |
| SLX1A-SULT1A3 readthrough (NMD candidate)                                                                                                                                            | SLX1A-SULT1A3                 | 1,18 |
| ribonuclease, RNase A family, 7                                                                                                                                                      | RNASE7                        | 1,18 |
| late endosomal/lysosomal adaptor, MAPK and MTOR activator 5                                                                                                                          | LAMTOR5                       | 1,18 |
| ELAV like neuron-specific RNA binding protein 3                                                                                                                                      | ELAVL3                        | 1,18 |
| shroom family member 3                                                                                                                                                               | SHROOM3                       | 1,18 |
| bridging integrator 2                                                                                                                                                                | BIN2                          | 1,18 |
| complement component 5a receptor 2                                                                                                                                                   | C5AR2                         | 1,18 |
| transmembrane protein 63C                                                                                                                                                            | TMEM63C                       | 1,18 |
| derlin 1                                                                                                                                                                             | DERL1                         | 1,18 |
| zinc finger protein 212                                                                                                                                                              | ZNF212                        | 1,18 |
| MRGPRG antisense RNA 1                                                                                                                                                               | MRGPRG-AS1                    | 1,18 |
| RNA binding motif protein, Y-linked, family 1, member F; RNA binding motif protein, Y-linked, family 2, member F pseudogene; RNA binding motif protein, Y-linked, family 1, member J | RBMY1F;<br>RBMY2FP;<br>RBMY1J | 1,18 |

|                                                                             |                                 |      |
|-----------------------------------------------------------------------------|---------------------------------|------|
| stromal antigen 3-like 4 (pseudogene)                                       | STAG3L4                         | 1,18 |
| cytotoxic T-lymphocyte-associated protein 4                                 | CTLA4                           | 1,18 |
| SKI family transcriptional corepressor 1                                    | SKOR1                           | 1,18 |
| Transcript Identified by AceView, Entrez Gene ID(s) 22849                   | CPEB3                           | 1,18 |
| fucokinase                                                                  | FUK                             | 1,18 |
| claudin 2                                                                   | CLDN2                           | 1,17 |
| inositol polyphosphate phosphatase-like 1                                   | INPPL1                          | 1,17 |
| glycoprotein IX (platelet)                                                  | GP9                             | 1,17 |
| fragile X mental retardation, autosomal homolog 1                           | FXR1                            | 1,17 |
| T-box 6                                                                     | TBX6                            | 1,17 |
| mannosidase, alpha, class 2C, member 1                                      | MAN2C1                          | 1,17 |
| G antigen 12H; G antigen 12B; G antigen 12C                                 | GAGE12H;<br>GAGE12B;<br>GAGE12C | 1,17 |
| G antigen 12D                                                               | GAGE12D                         | 1,17 |
| G antigen 12G; G antigen 12E                                                | GAGE12G;<br>GAGE12E             | 1,17 |
| glutamate receptor, metabotropic 8                                          | GRM8                            | 1,17 |
| chromosome 10 open reading frame 76                                         | C10orf76                        | 1,17 |
| mitochondrial pyruvate carrier 1-like                                       | MPC1L                           | 1,17 |
| archaelysin family metalloproteinase 2                                      | AMZ2                            | 1,17 |
| Williams Beuren syndrome chromosome region 22                               | WBSCR22                         | 1,17 |
| Kruppel-like factor 16                                                      | KLF16                           | 1,17 |
| 3-ketodihydrosphingosine reductase                                          | KDSR                            | 1,17 |
| chromosome 19 open reading frame 73                                         | C19orf73                        | 1,17 |
| Transcript Identified by AceView, Entrez Gene ID(s) 10673                   | TNFSF13B                        | 1,17 |
| REX1, RNA exonuclease 1 homolog-like 2, pseudogene                          | REXO1L2P                        | 1,17 |
| kelch domain containing 7B                                                  | KLHDC7B                         | 1,17 |
| transmembrane protein 88                                                    | TMEM88                          | 1,17 |
| SCO1 cytochrome c oxidase assembly protein                                  | SCO1                            | 1,17 |
| zinc finger protein 341                                                     | ZNF341                          | 1,17 |
| long intergenic non-protein coding RNA 1587                                 | LINC01587                       | 1,17 |
| ankyrin repeat and SOCS box containing 16                                   | ASB16                           | 1,17 |
| up-regulated during skeletal muscle growth 5 homolog (mouse); microRNA 1307 | USMG5; MIR1307                  | 1,17 |
| membrane-spanning 4-domains, subfamily A, member 14                         | MS4A14                          | 1,17 |
| solute carrier family 39 (zinc transporter), member 6                       | SLC39A6                         | 1,17 |
| solute carrier family 8 (sodium/calcium exchanger), member 2                | SLC8A2                          | 1,17 |
| cell division cycle 123                                                     | CDC123                          | 1,17 |
| GLIS family zinc finger 2                                                   | GLIS2                           | 1,17 |
| fragile X mental retardation 1 neighbor                                     | FMR1NB                          | 1,17 |

|                                                                                                                 |               |      |
|-----------------------------------------------------------------------------------------------------------------|---------------|------|
| Transcript Identified by AceView, Entrez Gene ID(s) 54443                                                       | ANLN          | 1,17 |
| peptidyl arginine deiminase, type III                                                                           | PADI3         | 1,17 |
| keratin associated protein 5-3                                                                                  | KRTAP5-3      | 1,17 |
| MOB kinase activator 3B                                                                                         | MOB3B         | 1,17 |
| complexin 1                                                                                                     | CPLX1         | 1,17 |
| ribosomal protein S6 kinase, 90kDa, polypeptide 5                                                               | RPS6KA5       | 1,17 |
| aprataxin and PNKP like factor                                                                                  | APLF          | 1,17 |
| enhancer of mRNA decapping 3                                                                                    | EDC3          | 1,17 |
| olfactory receptor, family 4, subfamily C, member 5<br>(gene/pseudogene)                                        | OR4C5         | 1,17 |
| coiled-coil domain containing 160                                                                               | CCDC160       | 1,17 |
| DEAD/H (Asp-Glu-Ala-Asp/His) box polypeptide 12,<br>pseudogene; DEAD/H (Asp-Glu-Ala-Asp/His) box helicase<br>11 | DDX12P; DDX11 | 1,17 |
| G protein-coupled receptor 87                                                                                   | GPR87         | 1,17 |
| zinc finger protein 613                                                                                         | ZNF613        | 1,17 |
| protein kinase C, alpha                                                                                         | PRKCA         | 1,17 |
| SPATA31 subfamily D, member 3                                                                                   | SPATA31D3     | 1,17 |
| surfactant associated 3                                                                                         | SFTA3         | 1,17 |
| tenomodulin                                                                                                     | TNMD          | 1,17 |
| X-linked Kx blood group related 9                                                                               | XKR9          | 1,17 |
| Hermansky-Pudlak syndrome 1; microRNA 4685                                                                      | HPS1; MIR4685 | 1,17 |
| leucine rich repeat containing 25                                                                               | LRRC25        | 1,17 |
| olfactory receptor, family 5, subfamily T, member 2                                                             | OR5T2         | 1,17 |
| MLX interacting protein                                                                                         | MLXIP         | 1,17 |
| PHD finger protein 7                                                                                            | PHF7          | 1,17 |
| PRP40 homolog, pre-mRNA processing factor B                                                                     | PRPF40B       | 1,17 |
| Transcript Identified by AceView, Entrez Gene ID(s)<br>54758; 100129637                                         | KLHDC4        | 1,17 |
| chromosome X open reading frame 21                                                                              | CXorf21       | 1,17 |
| peptidase inhibitor 16                                                                                          | PI16          | 1,17 |
| mutS homolog 3                                                                                                  | MSH3          | 1,17 |
| mitogen-activated protein kinase 8 interacting protein 1                                                        | MAPK8IP1      | 1,17 |
| lymphotoxin beta (TNF superfamily, member 3)                                                                    | LTB           | 1,17 |
| netrin 1                                                                                                        | NTN1          | 1,17 |
| prostaglandin D2 receptor (DP)                                                                                  | PTGDR         | 1,17 |
| REX1, RNA exonuclease 1 homolog-like 4, pseudogene                                                              | REXO1L4P      | 1,17 |
| ATP binding cassette subfamily A member 2                                                                       | ABCA2         | 1,17 |
| vasoactive intestinal peptide receptor 1                                                                        | VIPR1         | 1,17 |
| Dab, mitogen-responsive phosphoprotein, homolog 2<br>(Drosophila)                                               | DAB2          | 1,17 |
| Rho guanine nucleotide exchange factor 10                                                                       | ARHGEF10      | 1,17 |
| PRAME family member 1                                                                                           | PRAMEF1       | 1,17 |

|                                                                                                           |                     |      |
|-----------------------------------------------------------------------------------------------------------|---------------------|------|
| protein tyrosine phosphatase, receptor type, f polypeptide (PTPRF), interacting protein (liprin), alpha 4 | PPFIA4              | 1,17 |
| tubulin, beta 4B class IVb                                                                                | TUBB4B              | 1,17 |
| chromosome 5 open reading frame 42                                                                        | C5orf42             | 1,17 |
| adenosylhomocysteinase like 1                                                                             | AHCYL1              | 1,17 |
| olfactomedin like 2A                                                                                      | OLFML2A             | 1,17 |
| PSMG3 antisense RNA 1 (head to head)                                                                      | PSMG3-AS1           | 1,17 |
| tumor necrosis factor receptor superfamily, member 18                                                     | TNFRSF18            | 1,17 |
| glutamate receptor, metabotropic 6                                                                        | GRM6                | 1,17 |
| beta-1,4-N-acetyl-galactosaminyl transferase 2                                                            | B4GALNT2            | 1,17 |
| ubiquitin specific peptidase like 1                                                                       | USPL1               | 1,17 |
| activation-induced cytidine deaminase                                                                     | AICDA               | 1,17 |
| family with sequence similarity 221, member B                                                             | FAM221B             | 1,17 |
| NOP2/Sun domain family, member 5 pseudogene 2;<br>NOP2/Sun domain family, member 5 pseudogene 1           | NSUN5P2;<br>NSUN5P1 | 1,17 |
| delta(4)-desaturase, sphingolipid 1                                                                       | DEGS1               | 1,17 |
| branched chain ketoacid dehydrogenase kinase                                                              | BCKDK               | 1,17 |
| olfactory receptor, family 51, subfamily H, member 1                                                      | OR51H1              | 1,17 |
| cold inducible RNA binding protein                                                                        | CIRBP               | 1,17 |
| chromosome X open reading frame 65                                                                        | CXorf65             | 1,17 |
| strawberry notch homolog 2 (Drosophila)                                                                   | SBNO2               | 1,17 |
| RAB8B, member RAS oncogene family                                                                         | RAB8B               | 1,17 |
| olfactory receptor, family 51, subfamily Q, member 1<br>(gene/pseudogene)                                 | OR51Q1              | 1,17 |
| zinc finger protein 773                                                                                   | ZNF773              | 1,17 |
| zinc finger and SCAN domain containing 4                                                                  | ZSCAN4              | 1,17 |
| keratin 85, type II                                                                                       | KRT85               | 1,17 |
| coiled-coil domain containing 84                                                                          | CCDC84              | 1,17 |
| microtubule associated protein 2                                                                          | MAP2                | 1,17 |
| thromboxane A synthase 1 (platelet)                                                                       | TBXAS1              | 1,17 |
| zinc finger protein 135                                                                                   | ZNF135              | 1,17 |
| keratin 18, type I                                                                                        | KRT18               | 1,17 |
| chaperonin containing TCP1, subunit 4 (delta)                                                             | CCT4                | 1,17 |
| colony stimulating factor 2 receptor, beta, low-affinity<br>(granulocyte-macrophage)                      | CSF2RB              | 1,17 |
| interleukin 33                                                                                            | IL33                | 1,17 |
| thyrotropin-releasing hormone degrading enzyme                                                            | TRHDE               | 1,17 |
| zinc finger protein 230                                                                                   | ZNF230              | 1,17 |
| spermatogenic leucine zipper 1                                                                            | SPZ1                | 1,17 |
| trio Rho guanine nucleotide exchange factor                                                               | TRIO                | 1,17 |
| small proline-rich protein 1A                                                                             | SPRR1A              | 1,17 |
| tudor domain containing 12                                                                                | TDRD12              | 1,17 |
| cyclin J-like                                                                                             | CCNJL               | 1,17 |
| v-myc avian myelocytomatosis viral oncogene<br>neuroblastoma derived homolog                              | MYCN                | 1,17 |

|                                                                                                 |                         |      |
|-------------------------------------------------------------------------------------------------|-------------------------|------|
| NCK-associated protein 5                                                                        | NCKAP5                  | 1,17 |
| peroxisomal biogenesis factor 7                                                                 | PEX7                    | 1,17 |
| annexin A8                                                                                      | ANXA8                   | 1,17 |
| astrotactin 1                                                                                   | ASTN1                   | 1,17 |
| STE20-related kinase adaptor beta                                                               | STRADB                  | 1,17 |
| kelch-like family member 7                                                                      | KLHL7                   | 1,17 |
| uncharacterized LOC729220; novel transcript antisense to TAC4                                   | FLJ45513; RP11-304F15.3 | 1,17 |
| TRIM6-TRIM34 readthrough                                                                        | TRIM6-TRIM34            | 1,17 |
| WD repeat domain 31                                                                             | WDR31                   | 1,17 |
| mitogen-activated protein kinase kinase kinase 2                                                | MAP3K2                  | 1,17 |
| proline-rich transmembrane protein 2                                                            | PRRT2                   | 1,17 |
| maltase-glucoamylase 2 (putative)                                                               | MGAM2                   | 1,17 |
| consortin, connexin sorting protein                                                             | CNST                    | 1,17 |
| neuromedin B                                                                                    | NMB                     | 1,17 |
| glycoprotein V (platelet)                                                                       | GP5                     | 1,17 |
| coiled-coil domain containing 181                                                               | CCDC181                 | 1,17 |
| golgin A6 family, member A                                                                      | GOLGA6A                 | 1,17 |
| fibroblast growth factor 18                                                                     | FGF18                   | 1,17 |
| proline-rich acidic protein 1                                                                   | PRAP1                   | 1,17 |
| Memczak2013 ANTISENSE, CDS, coding, INTERNAL best transcript NM_001076552                       | ACSS2                   | 1,17 |
| keratin associated protein 5-2                                                                  | KRTAP5-2                | 1,17 |
| collagen, type V, alpha 2                                                                       | COL5A2                  | 1,17 |
| N-terminal EF-hand calcium binding protein 1                                                    | NECAB1                  | 1,17 |
| receptor (G protein-coupled) activity modifying protein 1                                       | RAMP1                   | 1,17 |
| Fanconi anemia core complex associated protein 20                                               | FAAP20                  | 1,17 |
| potassium channel, calcium activated intermediate/small conductance subfamily N alpha, member 1 | KCNN1                   | 1,17 |
| mitogen-activated protein kinase kinase kinase 19                                               | MAP3K19                 | 1,17 |
| aminoacyl tRNA synthetase complex-interacting multifunctional protein 2                         | AIMP2                   | 1,17 |
| gamma-aminobutyric acid (GABA) A receptor, gamma 3                                              | GABRG3                  | 1,17 |
| adrenocortical dysplasia homolog (mouse)                                                        | ACD                     | 1,17 |
| hepatocyte growth factor (hepapoietin A; scatter factor)                                        | HGF                     | 1,17 |
| mesenteric estrogen-dependent adipogenesis                                                      | MEDAG                   | 1,17 |
| ribosomal protein S6 kinase, 90kDa, polypeptide 1                                               | RPS6KA1                 | 1,17 |
| MAFF interacting protein (pseudogene); tektin 4 pseudogene 2                                    | MAFIP; TEKT4P2          | 1,17 |
| speedy/RINGO cell cycle regulator family member E4                                              | SPDYE4                  | 1,17 |
| dynein, axonemal, heavy chain 6                                                                 | DNAH6                   | 1,17 |
| tryptophan hydroxylase 1                                                                        | TPH1                    | 1,17 |

|                                                                                                                                        |                                 |      |
|----------------------------------------------------------------------------------------------------------------------------------------|---------------------------------|------|
| triggering receptor expressed on myeloid cells 2                                                                                       | TREM2                           | 1,17 |
| basic leucine zipper transcription factor, ATF-like 2                                                                                  | BATF2                           | 1,17 |
| copine V                                                                                                                               | CPNE5                           | 1,17 |
| early B-cell factor 2                                                                                                                  | EBF2                            | 1,17 |
| neuromedin B receptor                                                                                                                  | NMBR                            | 1,17 |
| nerve growth factor receptor (TNFRSF16) associated protein 1                                                                           | NGFRAP1                         | 1,17 |
| adaptor-related protein complex 1, gamma 1 subunit                                                                                     | AP1G1                           | 1,17 |
| ATP/GTP binding protein-like 2                                                                                                         | AGBL2                           | 1,17 |
| glutamate receptor, ionotropic, kainate 2                                                                                              | GRIK2                           | 1,17 |
| complement factor D (adipsin)                                                                                                          | CFD                             | 1,17 |
| solute carrier family 30 (zinc transporter), member 9                                                                                  | SLC30A9                         | 1,17 |
| tetraspanin 7                                                                                                                          | TSPAN7                          | 1,17 |
| diacylglycerol O-acyltransferase 2-like 6                                                                                              | DGAT2L6                         | 1,17 |
| de-etiolated homolog 1 (Arabidopsis)                                                                                                   | DET1                            | 1,17 |
| napsin A aspartic peptidase                                                                                                            | NAPSA                           | 1,17 |
| Transcript Identified by AceView, Entrez Gene ID(s) 54715                                                                              | A2BP1                           | 1,17 |
| FAST kinase domains 1                                                                                                                  | FASTKD1                         | 1,17 |
| ubiquitin-like modifier activating enzyme 1                                                                                            | UBA1                            | 1,17 |
| coiled-coil domain containing 136                                                                                                      | CCDC136                         | 1,17 |
| leucine zipper protein 2                                                                                                               | LUZP2                           | 1,17 |
| tigger transposable element derived 1; microRNA 5001                                                                                   | TIGD1; MIR5001                  | 1,17 |
| interleukin 2 receptor, beta                                                                                                           | IL2RB                           | 1,17 |
| Transcript Identified by AceView, Entrez Gene ID(s) 8829                                                                               | NRP1                            | 1,17 |
| AHA1, activator of heat shock 90kDa protein ATPase homolog 1 (yeast)                                                                   | AHSA1                           | 1,17 |
| G protein-coupled receptor 149                                                                                                         | GPR149                          | 1,17 |
| uncharacterized LOC101927668; Transcript Identified by AceView, Entrez Gene ID(s) 346389; novel transcript, sense overlapping to MACC1 | LOC101927668; AC005062.2; MACC1 | 1,17 |
| calcium channel, voltage-dependent, gamma subunit 8; microRNA 935                                                                      | CACNG8; MIR935                  | 1,17 |
| insulin receptor substrate 2                                                                                                           | IRS2                            | 1,17 |
| katanin p60 subunit A-like 1                                                                                                           | KATNAL1                         | 1,17 |
| fucosyltransferase 1 (galactoside 2-alpha-L-fucosyltransferase, H blood group)                                                         | FUT1                            | 1,17 |
| wingless-type MMTV integration site family, member 5A                                                                                  | WNT5A                           | 1,16 |
| ADAM metallopeptidase domain 18                                                                                                        | ADAM18                          | 1,16 |
| serum/glucocorticoid regulated kinase family, member 3                                                                                 | SGK3                            | 1,16 |
| microtubule-associated protein 1 light chain 3 alpha                                                                                   | MAP1LC3A                        | 1,16 |
| RecQ mediated genome instability 1                                                                                                     | RMI1                            | 1,16 |

|                                                                                                          |                                  |      |
|----------------------------------------------------------------------------------------------------------|----------------------------------|------|
| myosin IA                                                                                                | MYO1A                            | 1,16 |
| trinucleotide repeat containing 6B                                                                       | TNRC6B                           | 1,16 |
| neuroguidin, EIF4E binding protein                                                                       | NGDN                             | 1,16 |
| olfactory receptor, family 1, subfamily S, member 1<br>(gene/pseudogene)                                 | OR1S1                            | 1,16 |
| huntingtin interacting protein M                                                                         | HYPM                             | 1,16 |
| sphingosine-1-phosphate phosphatase 2                                                                    | SGPP2                            | 1,16 |
| pseudouridylate synthase 3                                                                               | PUS3                             | 1,16 |
| acyl-CoA oxidase-like                                                                                    | ACOXL                            | 1,16 |
| EBNA1 binding protein 2                                                                                  | EBNA1BP2                         | 1,16 |
| thymidine kinase 2, mitochondrial                                                                        | TK2                              | 1,16 |
| olfactory receptor, family 1, subfamily L, member 1                                                      | OR1L1                            | 1,16 |
| family with sequence similarity 9, member B                                                              | FAM9B                            | 1,16 |
| tripartite motif containing 77                                                                           | TRIM77                           | 1,16 |
| uncharacterized LOC284365; uncharacterized LOC284365<br>[Source:EntrezGene;Acc:284365]; novel transcript | MGC45922; CTD-<br>2568A17.5      | 1,16 |
| BCL2-like 14 (apoptosis facilitator)                                                                     | BCL2L14                          | 1,16 |
| glutamate rich 6B                                                                                        | ERICH6B                          | 1,16 |
| transketolase-like 2                                                                                     | TKTL2                            | 1,16 |
| zinc finger protein 43                                                                                   | ZNF43                            | 1,16 |
| Kirsten rat sarcoma viral oncogene homolog                                                               | KRAS                             | 1,16 |
| interferon, alpha 6                                                                                      | IFNA6                            | 1,16 |
| ZNF559-ZNF177 readthrough; zinc finger protein 177; zinc<br>finger protein 559                           | ZNF559-ZNF177;<br>ZNF177; ZNF559 | 1,16 |
| gypsy retrotransposon integrase 1                                                                        | GIN1                             | 1,16 |
| highly divergent homeobox                                                                                | HDX                              | 1,16 |
| calcium/calmodulin-dependent protein kinase ID                                                           | CAMK1D                           | 1,16 |
| C-type lectin-like 1                                                                                     | CLECL1                           | 1,16 |
| tetraspanin 10                                                                                           | TSPAN10                          | 1,16 |
| La ribonucleoprotein domain family, member 6                                                             | LARP6                            | 1,16 |
| MyoD family inhibitor                                                                                    | MDFI                             | 1,16 |
| WD repeat domain 19                                                                                      | WDR19                            | 1,16 |
| sperm acrosome associated 5B                                                                             | SPACA5B                          | 1,16 |
| acid phosphatase 2, lysosomal                                                                            | ACP2                             | 1,16 |
| fatty acid amide hydrolase 2                                                                             | FAAH2                            | 1,16 |
| Y box binding protein 1                                                                                  | YBX1                             | 1,16 |
| uncharacterized LOC100131303; novel transcript,<br>antisense to DUS2L                                    | LOC100131303;<br>CTC-479C5.6     | 1,16 |
| solute carrier family 25 (S-adenosylmethionine carrier),<br>member 26                                    | SLC25A26                         | 1,16 |
| aspartyl-tRNA synthetase 2, mitochondrial                                                                | DARS2                            | 1,16 |
| formyl peptide receptor 3                                                                                | FPR3                             | 1,16 |
| myosin VIIb                                                                                              | MYO7B                            | 1,16 |
| macrophage scavenger receptor 1                                                                          | MSR1                             | 1,16 |



|                                                                                                                                                                                                                                                                                                                                                                                                                                                                                                         |              |      |
|---------------------------------------------------------------------------------------------------------------------------------------------------------------------------------------------------------------------------------------------------------------------------------------------------------------------------------------------------------------------------------------------------------------------------------------------------------------------------------------------------------|--------------|------|
| adenosine deaminase                                                                                                                                                                                                                                                                                                                                                                                                                                                                                     | ADA          | 1,16 |
| gigaxonin; microRNA 4720                                                                                                                                                                                                                                                                                                                                                                                                                                                                                | GAN; MIR4720 | 1,16 |
| lymphoblastic leukemia associated hematopoiesis regulator 1                                                                                                                                                                                                                                                                                                                                                                                                                                             | LYL1         | 1,16 |
| melan-A                                                                                                                                                                                                                                                                                                                                                                                                                                                                                                 | MLANA        | 1,16 |
| trypsinogen-like pseudogene                                                                                                                                                                                                                                                                                                                                                                                                                                                                             | TRY2P        | 1,16 |
| SLAM family member 7                                                                                                                                                                                                                                                                                                                                                                                                                                                                                    | SLAMF7       | 1,16 |
| NADH dehydrogenase (ubiquinone) flavoprotein 2, 24kDa                                                                                                                                                                                                                                                                                                                                                                                                                                                   | NDUFV2       | 1,16 |
| regulatory factor X, 6                                                                                                                                                                                                                                                                                                                                                                                                                                                                                  | RFX6         | 1,16 |
| discs, large homolog 2 (Drosophila)                                                                                                                                                                                                                                                                                                                                                                                                                                                                     | DLG2         | 1,16 |
| SHC (Src homology 2 domain containing) family, member 4                                                                                                                                                                                                                                                                                                                                                                                                                                                 | SHC4         | 1,16 |
| microtubule-associated protein 7                                                                                                                                                                                                                                                                                                                                                                                                                                                                        | MAP7         | 1,16 |
| dentin matrix acidic phosphoprotein 1                                                                                                                                                                                                                                                                                                                                                                                                                                                                   | DMP1         | 1,16 |
| docking protein 5                                                                                                                                                                                                                                                                                                                                                                                                                                                                                       | DOK5         | 1,16 |
| G protein-coupled receptor 143                                                                                                                                                                                                                                                                                                                                                                                                                                                                          | GPR143       | 1,16 |
| tripartite motif containing 72, E3 ubiquitin protein ligase                                                                                                                                                                                                                                                                                                                                                                                                                                             | TRIM72       | 1,16 |
| integrin alpha FG-GAP repeat containing 1                                                                                                                                                                                                                                                                                                                                                                                                                                                               | ITFG1        | 1,16 |
| tetraspanin 18                                                                                                                                                                                                                                                                                                                                                                                                                                                                                          | TSPAN18      | 1,16 |
| Jeck2013 ANTISENSE, CDS, coding, INTERNAL, intronic, OVCODE, OVEXON best transcript NM_005529                                                                                                                                                                                                                                                                                                                                                                                                           | HSPG2        | 1,16 |
| Homo sapiens interleukin 3 receptor, alpha (low affinity) (IL3RA), transcript variant 2, mRNA.; Homo sapiens interleukin 3 receptor, alpha (low affinity) (IL3RA), transcript variant 1, mRNA.; interleukin 3 receptor, alpha (low affinity) [Source:HGNC Symbol;Acc:HGNC:6012]; Homo sapiens interleukin 3 receptor, alpha (low affinity), mRNA (cDNA clone MGC:34174 IMAGE:5167281), complete cds.; Salzman2013 ANNOTATED, CDS, coding, INTERNAL, OVCODE, OVERLAPTX, OVEXON best transcript NM_002183 | IL3RA        | 1,16 |
| myosin VIIA                                                                                                                                                                                                                                                                                                                                                                                                                                                                                             | MYO7A        | 1,16 |
| BEAN1 antisense RNA 1                                                                                                                                                                                                                                                                                                                                                                                                                                                                                   | BEAN1-AS1    | 1,16 |
| N-6 adenine-specific DNA methyltransferase 1 (putative)                                                                                                                                                                                                                                                                                                                                                                                                                                                 | N6AMT1       | 1,16 |
| glutathione S-transferase, C-terminal domain containing                                                                                                                                                                                                                                                                                                                                                                                                                                                 | GSTCD        | 1,16 |
| ciliary rootlet coiled-coil, rootletin family member 2 [Source:HGNC Symbol;Acc:HGNC:51677]                                                                                                                                                                                                                                                                                                                                                                                                              | CROCC2       | 1,16 |
| olfactory receptor, family 4, subfamily N, member 4                                                                                                                                                                                                                                                                                                                                                                                                                                                     | OR4N4        | 1,16 |
| nudix hydrolase 19                                                                                                                                                                                                                                                                                                                                                                                                                                                                                      | NUDT19       | 1,16 |
| C2 calcium-dependent domain containing 4A                                                                                                                                                                                                                                                                                                                                                                                                                                                               | C2CD4A       | 1,16 |

|                                                                                                              |                          |      |
|--------------------------------------------------------------------------------------------------------------|--------------------------|------|
| uncharacterized LOC100287036; novel transcript, antisense to ANKRD11                                         | LOC100287036; AC137932.6 | 1,16 |
| Transcript Identified by AceView, Entrez Gene ID(s) 127435                                                   | PODN                     | 1,16 |
| single-stranded DNA binding protein 2                                                                        | SSBP2                    | 1,16 |
| D-amino acid oxidase activator                                                                               | DAOA                     | 1,16 |
| regulator of G-protein signaling 5                                                                           | RGS5                     | 1,16 |
| chromosome 12 open reading frame 50                                                                          | C12orf50                 | 1,16 |
| zinc finger and SCAN domain containing 22; microRNA 6806                                                     | ZSCAN22; MIR6806         | 1,16 |
| Kell blood group, metallo-endopeptidase                                                                      | KEL                      | 1,16 |
| integrin alpha 7                                                                                             | ITGA7                    | 1,16 |
| chromosome 5 open reading frame 49                                                                           | C5orf49                  | 1,16 |
| zinc finger protein 512                                                                                      | ZNF512                   | 1,16 |
| insulin-like growth factor 2 mRNA binding protein 3                                                          | IGF2BP3                  | 1,16 |
| phosphatidylinositol transfer protein, beta                                                                  | PITPNB                   | 1,16 |
| zinc finger protein 705B                                                                                     | ZNF705B                  | 1,16 |
| tyrosine 3-monooxygenase/tryptophan 5-monooxygenase activation protein, gamma                                | YWHAG                    | 1,16 |
| solute carrier family 25 (mitochondrial carrier, brain), member 14                                           | SLC25A14                 | 1,16 |
| family with sequence similarity 65, member B                                                                 | FAM65B                   | 1,16 |
| insulin-like 6                                                                                               | INSL6                    | 1,16 |
| lymphocyte expansion molecule                                                                                | LEXM                     | 1,16 |
| Gse1 coiled-coil protein                                                                                     | GSE1                     | 1,16 |
| chromosome 15 open reading frame 54                                                                          | C15orf54                 | 1,16 |
| paired-like homeobox 2a                                                                                      | PHOX2A                   | 1,16 |
| chromosome 17 open reading frame 97                                                                          | C17orf97                 | 1,16 |
| guanine nucleotide binding protein (G protein), alpha transducing activity polypeptide 2                     | GNAT2                    | 1,16 |
| Transcript Identified by AceView, Entrez Gene ID(s) 114800                                                   | CCDC85A                  | 1,16 |
| protein kinase C, iota                                                                                       | PRKCI                    | 1,16 |
| Transcript Identified by AceView, Entrez Gene ID(s) 54715                                                    | A2BP1                    | 1,16 |
| ST6 (alpha-N-acetyl-neuraminy-2,3-beta-galactosyl-1,3)-N-acetylgalactosaminide alpha-2,6-sialyltransferase 2 | ST6GALNAC2               | 1,16 |
| endomucin                                                                                                    | EMCN                     | 1,16 |
| citron rho-interacting serine/threonine kinase; microRNA 1178                                                | CIT; MIR1178             | 1,16 |
| cleavage stimulation factor, 3 pre-RNA, subunit 2, tau variant                                               | CSTF2T                   | 1,16 |
| Kruppel-like factor 14                                                                                       | KLF14                    | 1,16 |
| zinc finger protein 383                                                                                      | ZNF383                   | 1,16 |

|                                                                                                                     |                   |      |
|---------------------------------------------------------------------------------------------------------------------|-------------------|------|
| ankyrin repeat and sterile alpha motif domain containing 3                                                          | ANKS3             | 1,16 |
| Sp1 transcription factor                                                                                            | SP1               | 1,16 |
| acyl-CoA dehydrogenase, long chain                                                                                  | ACADL             | 1,16 |
| t-complex 11, testis-specific                                                                                       | TCP11             | 1,16 |
| Sin3A associated protein 130kDa                                                                                     | SAP130            | 1,16 |
| Cas scaffolding protein family member 4                                                                             | CASS4             | 1,16 |
| zinc finger protein 436                                                                                             | ZNF436            | 1,16 |
| glia maturation factor, beta                                                                                        | GMFB              | 1,16 |
| heterogeneous nuclear ribonucleoprotein U-like 1                                                                    | HNRNPUL1          | 1,16 |
| olfactory receptor, family 10, subfamily T, member 2                                                                | OR10T2            | 1,16 |
| tRNA methyltransferase 2 homolog B                                                                                  | TRMT2B            | 1,16 |
| defensin, beta 134                                                                                                  | DEFB134           | 1,16 |
| paraneoplastic Ma antigen 3                                                                                         | PNMA3             | 1,16 |
| EMI domain containing 1                                                                                             | EMID1             | 1,16 |
| chordin                                                                                                             | CHRD              | 1,16 |
| PRAME family member 11                                                                                              | PRAMEF11          | 1,16 |
| zinc finger protein 853                                                                                             | ZNF853            | 1,16 |
| trefoil factor 2                                                                                                    | TFF2              | 1,16 |
| long intergenic non-protein coding RNA 116                                                                          | LINC00116         | 1,16 |
| steroid sulfatase (microsomal), isozyme S                                                                           | STS               | 1,16 |
| platelet-activating factor acetylhydrolase 1b, catalytic subunit 2 (30kDa)                                          | PAFAH1B2          | 1,16 |
| fascin actin-bundling protein 3, testicular                                                                         | FSCN3             | 1,16 |
| transient receptor potential cation channel, subfamily M, member 6                                                  | TRPM6             | 1,16 |
| PRAME family member 4                                                                                               | PRAMEF4           | 1,16 |
| claudin 3                                                                                                           | CLDN3             | 1,16 |
| zinc finger protein 205                                                                                             | ZNF205            | 1,16 |
| protein phosphatase 1, regulatory subunit 16B                                                                       | PPP1R16B          | 1,16 |
| family with sequence similarity 26, member F                                                                        | FAM26F            | 1,16 |
| methyltransferase like 4                                                                                            | METTL4            | 1,16 |
| zinc finger protein 222                                                                                             | ZNF222            | 1,16 |
| lectin, galactoside-binding, soluble, 9                                                                             | LGALS9            | 1,16 |
| structural maintenance of chromosomes 6                                                                             | SMC6              | 1,16 |
| N-acetyltransferase 2 (arylamine N-acetyltransferase)                                                               | NAT2              | 1,16 |
| olfactory receptor, family 2, subfamily A, member 5                                                                 | OR2A5             | 1,16 |
| sema domain, transmembrane domain (TM), and cytoplasmic domain, (semaphorin) 6A                                     | SEMA6A            | 1,16 |
| Rho GTPase activating protein 33                                                                                    | ARHGAP33          | 1,16 |
| RNA binding motif protein, Y-linked, family 1, member E;<br>RNA binding motif protein, Y-linked, family 1, member B | RBMY1E;<br>RBMY1B | 1,16 |
| MOB kinase activator 1B                                                                                             | MOB1B             | 1,16 |
| sprouty-related, EVH1 domain containing 1                                                                           | SPRED1            | 1,16 |

|                                                                                                 |                                  |      |
|-------------------------------------------------------------------------------------------------|----------------------------------|------|
| ankyrin repeat and FYVE domain containing 1                                                     | ANKFY1                           | 1,16 |
| glycerol kinase 2                                                                               | GK2                              | 1,16 |
| LY6/PLAUR domain containing 5                                                                   | LYPD5                            | 1,16 |
| BRF2, RNA polymerase III transcription initiation factor<br>50 kDa subunit                      | BRF2                             | 1,16 |
| nuclear pore complex interacting protein family, member<br>B5                                   | NPIP5                            | 1,16 |
| transmembrane inner ear                                                                         | TMIE                             | 1,16 |
| zinc finger protein 670; zinc finger protein 695; ZNF670-<br>ZNF695 readthrough (NMD candidate) | ZNF670; ZNF695;<br>ZNF670-ZNF695 | 1,16 |
| RAB39B, member RAS oncogene family                                                              | RAB39B                           | 1,16 |
| LTV1 ribosome biogenesis factor                                                                 | LTV1                             | 1,16 |
| neurexin 2                                                                                      | NRXN2                            | 1,16 |
| mitogen-activated protein kinase kinase kinase 7                                                | MAP3K7                           | 1,16 |
| transmembrane protein 189                                                                       | TMEM189                          | 1,16 |
| chromosome 2 open reading frame 27B                                                             | C2orf27B                         | 1,16 |
| SAM and SH3 domain containing 3                                                                 | SASH3                            | 1,16 |
| annexin A4                                                                                      | ANXA4                            | 1,16 |
| complement component 1, q subcomponent, A chain                                                 | C1QA                             | 1,16 |
| peptidylprolyl isomerase (cyclophilin)-like 6                                                   | PPIL6                            | 1,16 |
| family with sequence similarity 133, member A                                                   | FAM133A                          | 1,16 |
| envoplakin-like                                                                                 | EVPLL                            | 1,16 |
| cone-rod homeobox                                                                               | CRX                              | 1,16 |
| ring finger protein 32                                                                          | RNF32                            | 1,16 |
| sodium channel and clathrin linker 1                                                            | SCLT1                            | 1,16 |
| chromosome 10 open reading frame 105                                                            | C10orf105                        | 1,16 |
| epithelial cell transforming 2 like                                                             | ECT2L                            | 1,16 |
| X-prolyl aminopeptidase 3, mitochondrial                                                        | XPNPEP3                          | 1,16 |
| strawberry notch homolog 1 (Drosophila); microRNA 8072                                          | SBNO1; MIR8072                   | 1,16 |
| polymerase (RNA) II (DNA directed) polypeptide J3                                               | POLR2J3                          | 1,16 |
| cadherin 13                                                                                     | CDH13                            | 1,16 |
| Memczak2013 ANTISENSE, coding, INTERNAL, intronic<br>best transcript NM_005308                  | GRK5                             | 1,16 |
| olfactory receptor, family 5, subfamily K, member 1                                             | OR5K1                            | 1,16 |
| aldehyde dehydrogenase 1 family, member A3                                                      | ALDH1A3                          | 1,16 |
| vimentin-type intermediate filament associated coiled-<br>coil protein                          | VMAC                             | 1,16 |
| Memczak2013 ANTISENSE, CDS, coding, INTERNAL best<br>transcript NM_002473                       | MYH9                             | 1,16 |
| transmembrane protein 51                                                                        | TMEM51                           | 1,16 |
| cancer susceptibility candidate 1                                                               | CASC1                            | 1,16 |
| apelin                                                                                          | APLN                             | 1,16 |
| WSC domain containing 1                                                                         | WSCD1                            | 1,16 |
| NLR family, pyrin domain containing 13                                                          | NLRP13                           | 1,16 |

|                                                                                                       |                                            |      |
|-------------------------------------------------------------------------------------------------------|--------------------------------------------|------|
| transmembrane protein 139                                                                             | TMEM139                                    | 1,16 |
| kelch repeat and BTB (POZ) domain containing 2                                                        | KBTBD2                                     | 1,16 |
| family with sequence similarity 47, member A                                                          | FAM47A                                     | 1,16 |
| solute carrier family 39 (zinc transporter), member 13                                                | SLC39A13                                   | 1,16 |
| KIAA0355                                                                                              | KIAA0355                                   | 1,16 |
| chemokine (C-C motif) receptor 10                                                                     | CCR10                                      | 1,16 |
| crystallin gamma D                                                                                    | CRYGD                                      | 1,16 |
| desert hedgehog                                                                                       | DHH                                        | 1,16 |
| erythrocyte membrane protein band 4.1-like 3                                                          | EPB41L3                                    | 1,15 |
| autophagy related 14                                                                                  | ATG14                                      | 1,15 |
| angiopoietin like 7                                                                                   | ANGPTL7                                    | 1,15 |
| calcium channel, voltage-dependent, gamma subunit 6                                                   | CACNG6                                     | 1,15 |
| transmembrane protein 244                                                                             | TMEM244                                    | 1,15 |
| recombination activating gene 1                                                                       | RAG1                                       | 1,15 |
| interferon-induced protein with tetratricopeptide repeats 5                                           | IFIT5                                      | 1,15 |
| UPF3 regulator of nonsense transcripts homolog B (yeast)                                              | UPF3B                                      | 1,15 |
| zinc finger family member 783                                                                         | ZNF783                                     | 1,15 |
| armadillo repeat containing 6                                                                         | ARMC6                                      | 1,15 |
| homeobox C11                                                                                          | HOXC11                                     | 1,15 |
| protein kinase C, delta                                                                               | PRKCD                                      | 1,15 |
| neurotrophic tyrosine kinase, receptor, type 2                                                        | NTRK2                                      | 1,15 |
| Memczak2013 ANTISENSE, CDS, coding, INTERNAL best transcript NM_182962                                | BIRC3                                      | 1,15 |
| MTND2                                                                                                 | ND2                                        | 1,15 |
| S100 calcium binding protein A7 like 2                                                                | S100A7L2                                   | 1,15 |
| zinc finger protein 26                                                                                | ZNF26                                      | 1,15 |
| proline rich 5 like                                                                                   | PRR5L                                      | 1,15 |
| Memczak2013 ANTISENSE, coding, INTERNAL, intronic best transcript NM_014699                           | ZNF646                                     | 1,15 |
| uncharacterized LOC100506388; Transcript Identified by AceView; novel transcript, antisense to RPH3AL | LOC100506388;<br>RP11-1260E13.4;<br>hosaru | 1,15 |
| betacellulin                                                                                          | BTC                                        | 1,15 |
| transmembrane protein 230                                                                             | TMEM230                                    | 1,15 |
| H6 family homeobox 2                                                                                  | HMX2                                       | 1,15 |
| haloacid dehalogenase-like hydrolase domain containing 3                                              | HDHD3                                      | 1,15 |
| KAT8 regulatory NSL complex subunit 1                                                                 | KANSL1                                     | 1,15 |
| basic charge, Y-linked, 2C; basic charge, Y-linked, 2                                                 | BPY2C; BPY2                                | 1,15 |
| N-ethylmaleimide-sensitive factor                                                                     | NSF                                        | 1,15 |
| nicotinamide riboside kinase 2                                                                        | NMRK2                                      | 1,15 |
| PDGFA associated protein 1                                                                            | PDAP1                                      | 1,15 |
| zinc finger protein 385C                                                                              | ZNF385C                                    | 1,15 |

|                                                                                                                                                                                                                     |                                                           |      |
|---------------------------------------------------------------------------------------------------------------------------------------------------------------------------------------------------------------------|-----------------------------------------------------------|------|
| DnaJ (Hsp40) homolog, subfamily B, member 3                                                                                                                                                                         | DNAJB3                                                    | 1,15 |
| transmembrane protein 217                                                                                                                                                                                           | TMEM217                                                   | 1,15 |
| glucocorticoid modulatory element binding protein 2                                                                                                                                                                 | GMEB2                                                     | 1,15 |
| succinate dehydrogenase complex assembly factor 2                                                                                                                                                                   | SDHAF2                                                    | 1,15 |
| Fas (TNFRSF6) binding factor 1                                                                                                                                                                                      | FBF1                                                      | 1,15 |
| HKR1, GLI-Kruppel zinc finger family member                                                                                                                                                                         | HKR1                                                      | 1,15 |
| keratin 26, type I                                                                                                                                                                                                  | KRT26                                                     | 1,15 |
| VAMP associated protein A                                                                                                                                                                                           | VAPA                                                      | 1,15 |
| EP400 N-terminal like                                                                                                                                                                                               | EP400NL                                                   | 1,15 |
| MANSC domain containing 4                                                                                                                                                                                           | MANSC4                                                    | 1,15 |
| microtubule associated monooxygenase, calponin and LIM domain containing 3                                                                                                                                          | MICAL3                                                    | 1,15 |
| vacuolar protein sorting 25 homolog (S. cerevisiae)                                                                                                                                                                 | VPS25                                                     | 1,15 |
| coiled-coil domain containing 59                                                                                                                                                                                    | CCDC59                                                    | 1,15 |
| autophagy related 16-like 1                                                                                                                                                                                         | ATG16L1                                                   | 1,15 |
| zinc finger protein 880                                                                                                                                                                                             | ZNF880                                                    | 1,15 |
| Transcript Identified by AceView, Entrez Gene ID(s) 114876                                                                                                                                                          | OSBPL1A                                                   | 1,15 |
| MAD2L1 binding protein                                                                                                                                                                                              | MAD2L1BP                                                  | 1,15 |
| fetal and adult testis expressed 1                                                                                                                                                                                  | FATE1                                                     | 1,15 |
| thromboxane A2 receptor                                                                                                                                                                                             | TBXA2R                                                    | 1,15 |
| carboxypeptidase X (M14 family), member 2                                                                                                                                                                           | CPXM2                                                     | 1,15 |
| RAS p21 protein activator 4B; RAS p21 protein activator 4                                                                                                                                                           | RASA4B; RASA4                                             | 1,15 |
| ribonuclease P/MRP 25kDa subunit                                                                                                                                                                                    | RPP25                                                     | 1,15 |
| UBX domain protein 8                                                                                                                                                                                                | UBXN8                                                     | 1,15 |
| eva-1 homolog C (C. elegans)                                                                                                                                                                                        | EVA1C                                                     | 1,15 |
| adenylate cyclase activating polypeptide 1 (pituitary)                                                                                                                                                              | ADCYAP1                                                   | 1,15 |
| paired immunoglobulin-like type 2 receptor beta; stromal antigen 3-like 5 pseudogene; poliovirus receptor related immunoglobulin domain containing 2, pseudogene; microRNA 6840; STAG3L5P-PVRIG2P-PILRB readthrough | PILRB; STAG3L5P; PVRIG2P; MIR6840; STAG3L5P-PVRIG2P-PILRB | 1,15 |
| family with sequence similarity 189, member A2                                                                                                                                                                      | FAM189A2                                                  | 1,15 |
| centrosomal protein 97kDa                                                                                                                                                                                           | CEP97                                                     | 1,15 |
| glutamate decarboxylase 2                                                                                                                                                                                           | GAD2                                                      | 1,15 |
| mediator complex subunit 31                                                                                                                                                                                         | MED31                                                     | 1,15 |
| olfactory receptor, family 4, subfamily A, member 47                                                                                                                                                                | OR4A47                                                    | 1,15 |
| asteroid homolog 1 (Drosophila)                                                                                                                                                                                     | ASTE1                                                     | 1,15 |
| ST3 beta-galactoside alpha-2,3-sialyltransferase 6                                                                                                                                                                  | ST3GAL6                                                   | 1,15 |
| potassium channel tetramerization domain containing 13                                                                                                                                                              | KCTD13                                                    | 1,15 |
| EPH receptor A8                                                                                                                                                                                                     | EPHA8                                                     | 1,15 |
| CD34 molecule                                                                                                                                                                                                       | CD34                                                      | 1,15 |
| tubulin, alpha 3e                                                                                                                                                                                                   | TUBA3E                                                    | 1,15 |

|                                                                                                                |                   |      |
|----------------------------------------------------------------------------------------------------------------|-------------------|------|
| olfactory receptor, family 10, subfamily G, member 7                                                           | OR10G7            | 1,15 |
| RAB, member of RAS oncogene family-like 2B                                                                     | RABL2B            | 1,15 |
| Memczak2013 ANTISENSE, CDS, coding, INTERNAL best transcript NM_015356                                         | SCRIB             | 1,15 |
| membrane-spanning 4-domains, subfamily A, member 12                                                            | MS4A12            | 1,15 |
| sterile alpha motif domain containing 12                                                                       | SAMD12            | 1,15 |
| Memczak2013 ANTISENSE, CDS, coding, INTERNAL, UTR3 best transcript NM_080668                                   | CDCA5             | 1,15 |
| SH3 and cysteine rich domain                                                                                   | STAC              | 1,15 |
| olfactory receptor, family 5, subfamily V, member 1                                                            | OR5V1             | 1,15 |
| protease, serine, 55                                                                                           | PRSS55            | 1,15 |
| TraB domain containing 2A                                                                                      | TRABD2A           | 1,15 |
| barrier to autointegration factor 2                                                                            | BANF2             | 1,15 |
| golgin A6 family, member D                                                                                     | GOLGA6D           | 1,15 |
| chromosome 6 open reading frame 141                                                                            | C6orf141          | 1,15 |
| calcium homeostasis modulator 2                                                                                | CALHM2            | 1,15 |
| Zhang2013 ALT_ACCEPTOR, ALT_DONOR, coding, INTERNAL, intronic best transcript NM_004559                        | YBX1              | 1,15 |
| family with sequence similarity 96, member B                                                                   | FAM96B            | 1,15 |
| galanin-like peptide                                                                                           | GALP              | 1,15 |
| von Willebrand factor                                                                                          | VWF               | 1,15 |
| tissue specific transplantation antigen P35B                                                                   | TSTA3             | 1,15 |
| Smith-Magenis syndrome chromosome region, candidate 5 (non-protein coding)                                     | SMCR5             | 1,15 |
| ceroid-lipofuscinosis, neuronal 3; nuclear pore complex interacting protein family, member B7                  | CLN3; NPIP7       | 1,15 |
| oxoglutarate (alpha-ketoglutarate) receptor 1                                                                  | OXGR1             | 1,15 |
| CD27 molecule                                                                                                  | CD27              | 1,15 |
| zinc finger and BTB domain containing 24                                                                       | ZBTB24            | 1,15 |
| MORN repeat containing 2                                                                                       | MORN2             | 1,15 |
| membrane protein, palmitoylated 2                                                                              | MPP2              | 1,15 |
| mitochondrial carrier 2                                                                                        | MTCH2             | 1,15 |
| lactamase, beta                                                                                                | LACTB             | 1,15 |
| carcinoembryonic antigen-related cell adhesion molecule 20                                                     | CEACAM20          | 1,15 |
| defensin, beta 125                                                                                             | DEFB125           | 1,15 |
| coiled-coil domain containing 8                                                                                | CCDC8             | 1,15 |
| tubby like protein 3                                                                                           | TULP3             | 1,15 |
| transcription elongation factor B polypeptide 3C-like 2; transcription elongation factor B polypeptide 3C-like | TCEB3CL2; TCEB3CL | 1,15 |
| phosphatidylinositol-4,5-bisphosphate 3-kinase, catalytic subunit alpha                                        | PIK3CA            | 1,15 |
| NK1 homeobox 1                                                                                                 | NKX1-1            | 1,15 |
| receptor (chemosensory) transporter protein 1                                                                  | RTP1              | 1,15 |

|                                                                                       |                               |      |
|---------------------------------------------------------------------------------------|-------------------------------|------|
| G protein-coupled receptor 61                                                         | GPR61                         | 1,15 |
| ubiquitin conjugating enzyme E2I                                                      | UBE2I                         | 1,15 |
| spermatogenesis associated, serine-rich 1                                             | SPATS1                        | 1,15 |
| GIMAP1-GIMAP5 readthrough; GTPase, IMAP family member 5; GTPase, IMAP family member 1 | GIMAP1-GIMAP5; GIMAP5; GIMAP1 | 1,15 |
| integrin, alpha M (complement component 3 receptor 3 subunit)                         | ITGAM                         | 1,15 |
| coiled-coil domain containing 171                                                     | CCDC171                       | 1,15 |
| sialidase 2 (cytosolic sialidase)                                                     | NEU2                          | 1,15 |
| malate dehydrogenase 2                                                                | MDH2                          | 1,15 |
| ATPase, Na+/K+ transporting, alpha 4 polypeptide                                      | ATP1A4                        | 1,15 |
| proteasome (prosome, macropain) assembly chaperone 4                                  | PSMG4                         | 1,15 |
| translocase of inner mitochondrial membrane 17 homolog B (yeast)                      | TIMM17B                       | 1,15 |
| PHD finger protein 3                                                                  | PHF3                          | 1,15 |
| tryptophan hydroxylase 2                                                              | TPH2                          | 1,15 |
| CD5 molecule                                                                          | CD5                           | 1,15 |
| transmembrane protein 59                                                              | TMEM59                        | 1,15 |
| transmembrane protein 246                                                             | TMEM246                       | 1,15 |
| spermatogenesis associated 32                                                         | SPATA32                       | 1,15 |
| calcium channel, voltage-dependent, beta 3 subunit                                    | CACNB3                        | 1,15 |
| gastric intrinsic factor (vitamin B synthesis)                                        | GIF                           | 1,15 |
| hematopoietic cell-specific Lyn substrate 1                                           | HCLS1                         | 1,15 |
| tryptase delta 1                                                                      | TPSD1                         | 1,15 |
| PRAME family member 9                                                                 | PRAMEF9                       | 1,15 |
| cytoplasmic FMR1 interacting protein 1                                                | CYFIP1                        | 1,15 |
| signaling threshold regulating transmembrane adaptor 1                                | SIT1                          | 1,15 |
| v-myc avian myelocytomatosis viral oncogene lung carcinoma derived homolog            | MYCL                          | 1,15 |
| ribosomal protein S6 kinase, 90kDa, polypeptide 1                                     | RPS6KA1                       | 1,15 |
| malignant T-cell amplified sequence 1                                                 | MCTS1                         | 1,15 |
| coiled-coil domain containing 172                                                     | CCDC172                       | 1,15 |
| coiled-coil domain containing 71                                                      | CCDC71                        | 1,15 |
| cell cycle exit and neuronal differentiation 1                                        | CEND1                         | 1,15 |
| cortexin 2                                                                            | CTXN2                         | 1,15 |
| PHD finger protein 21A                                                                | PHF21A                        | 1,15 |
| mitochondrial coiled-coil domain 1                                                    | MCCD1                         | 1,15 |
| glyoxalase domain containing 5                                                        | GLOD5                         | 1,15 |
| ATP binding cassette subfamily C member 9                                             | ABCC9                         | 1,15 |
| coiled-coil domain containing 84                                                      | CCDC84                        | 1,15 |
| ankyrin repeat domain 53                                                              | ANKRD53                       | 1,15 |
| ferric-chelate reductase 1-like                                                       | FRRS1L                        | 1,15 |
| ureidopropionase, beta                                                                | UPB1                          | 1,15 |



|                                                                                                       |                               |      |
|-------------------------------------------------------------------------------------------------------|-------------------------------|------|
| SH2B adaptor protein 2                                                                                | SH2B2                         | 1,15 |
| shisa family member 3                                                                                 | SHISA3                        | 1,15 |
| guanine nucleotide binding protein (G protein), alpha activating activity polypeptide, olfactory type | GNAL                          | 1,15 |
| coiled-coil domain containing 63                                                                      | CCDC63                        | 1,15 |
| chromosome 4 open reading frame 45                                                                    | C4orf45                       | 1,15 |
| TRAF3 interacting protein 3                                                                           | TRAF3IP3                      | 1,15 |
| transcription factor 23                                                                               | TCF23                         | 1,15 |
| glycosyltransferase like domain containing 1                                                          | GTDC1                         | 1,15 |
| armadillo repeat containing 9                                                                         | ARMC9                         | 1,15 |
| NADH dehydrogenase (ubiquinone) 1 alpha subcomplex, 12                                                | NDUFA12                       | 1,15 |
| transcription factor 12                                                                               | TCF12                         | 1,15 |
| transmembrane protease, serine 11A                                                                    | TMPRSS11A                     | 1,15 |
| zinc finger, ZZ-type containing 3                                                                     | ZZZ3                          | 1,15 |
| tyrosinase                                                                                            | TYR                           | 1,15 |
| Transcript Identified by AceView, Entrez Gene ID(s) 6453                                              | ITSN1                         | 1,15 |
| uncharacterized LOC100129697; novel transcript, antisense to CBFA2T3                                  | LOC100129697;<br>RP11-830F9.6 | 1,15 |
| glycosylated lysosomal membrane protein                                                               | GLMP                          | 1,15 |
| Transcript Identified by AceView, Entrez Gene ID(s) 215                                               | ABCD1                         | 1,15 |
| autophagy related 16-like 1                                                                           | ATG16L1                       | 1,15 |
| lymphocyte antigen 6 complex, locus G5B; casein kinase 2, beta polypeptide                            | LY6G5B; CSNK2B                | 1,15 |
| SLIT and NTRK-like family, member 3                                                                   | SLITRK3                       | 1,15 |
| interferon-induced protein with tetratricopeptide repeats 3                                           | IFIT3                         | 1,15 |
| keratin 40, type I                                                                                    | KRT40                         | 1,15 |
| long intergenic non-protein coding RNA 1567                                                           | LINC01567                     | 1,15 |
| transducin-like enhancer of split 3                                                                   | TLE3                          | 1,15 |
| SMG9 nonsense mediated mRNA decay factor                                                              | SMG9                          | 1,15 |
| forkhead box I1                                                                                       | FOXI1                         | 1,15 |
| follicle stimulating hormone, beta polypeptide                                                        | FSHB                          | 1,15 |
| GSK3B interacting protein                                                                             | GSKIP                         | 1,15 |
| isoleucyl-tRNA synthetase                                                                             | IARS                          | 1,15 |
| paraneoplastic Ma antigen family-like 1                                                               | PNMAL1                        | 1,15 |
| zinc finger protein 197                                                                               | ZNF197                        | 1,15 |
| osteoclast associated, immunoglobulin-like receptor                                                   | OSCAR                         | 1,15 |
| meiosis specific with coiled-coil domain                                                              | MEIOC                         | 1,15 |
| DDB1 and CUL4 associated factor 4-like 2                                                              | DCAF4L2                       | 1,15 |
| cholinergic receptor, nicotinic alpha 6                                                               | CHRNA6                        | 1,15 |
| DEAD (Asp-Glu-Ala-Asp) box polypeptide 39B; small nucleolar RNA, C/D box 84                           | DDX39B;<br>SNORD84            | 1,15 |
| coiled-coil serine rich protein 2                                                                     | CCSER2                        | 1,15 |

|                                                                        |            |      |
|------------------------------------------------------------------------|------------|------|
| leucine-rich repeat containing G protein-coupled receptor 5            | LGR5       | 1,15 |
| WAP four-disulfide core domain 2                                       | WFDC2      | 1,15 |
| proline rich Gla (G-carboxyglutamic acid) 2                            | PRRG2      | 1,15 |
| tripartite motif containing 17                                         | TRIM17     | 1,15 |
| spalt-like transcription factor 4                                      | SALL4      | 1,15 |
| NADH dehydrogenase, subunit 6 (complex I)                              | ND6        | 1,15 |
| eukaryotic translation initiation factor 3, subunit G                  | EIF3G      | 1,15 |
| adhesion molecule with Ig-like domain 2                                | AMIGO2     | 1,15 |
| ring finger protein 219                                                | RNF219     | 1,15 |
| ribosomal protein L3-like                                              | RPL3L      | 1,15 |
| MANSC domain containing 1                                              | MANSC1     | 1,15 |
| inducible T-cell co-stimulator ligand                                  | ICOSLG     | 1,15 |
| ATP binding cassette subfamily D member 2                              | ABCD2      | 1,15 |
| ATP/GTP binding protein-like 4                                         | AGBL4      | 1,15 |
| translin-associated factor X                                           | TSNAX      | 1,15 |
| zinc finger protein 430                                                | ZNF430     | 1,15 |
| mutL homolog 1                                                         | MLH1       | 1,15 |
| neurexin 1                                                             | NRXN1      | 1,15 |
| zinc finger protein 878                                                | ZNF878     | 1,15 |
| adenylate kinase 5                                                     | AK5        | 1,15 |
| interleukin 31 receptor A                                              | IL31RA     | 1,15 |
| zinc finger protein 71                                                 | ZNF71      | 1,15 |
| integrin alpha E                                                       | ITGAE      | 1,15 |
| Pim-3 proto-oncogene, serine/threonine kinase                          | PIM3       | 1,14 |
| LON peptidase N-terminal domain and ring finger 2                      | LONRF2     | 1,14 |
| TRAF2 and NCK interacting kinase                                       | TNIK       | 1,14 |
| membrane-spanning 4-domains, subfamily A, member 5                     | MS4A5      | 1,14 |
| purinergic receptor P2X, ligand gated ion channel, 2                   | P2RX2      | 1,14 |
| guanylate cyclase 2C                                                   | GUCY2C     | 1,14 |
| A kinase (PRKA) anchor protein 14                                      | AKAP14     | 1,14 |
| leucine rich repeat containing 52                                      | LRRC52     | 1,14 |
| non imprinted in Prader-Willi/Angelman syndrome 1                      | NIPA1      | 1,14 |
| leucine rich repeat containing 37, member A11,<br>pseudogene           | LRRC37A11P | 1,14 |
| membrane bound O-acyltransferase domain containing 1                   | MBOAT1     | 1,14 |
| protein tyrosine phosphatase, non-receptor type 12                     | PTPN12     | 1,14 |
| NOP2/Sun RNA methyltransferase family, member 2                        | NSUN2      | 1,14 |
| RNA binding motif protein 34                                           | RBM34      | 1,14 |
| natural killer cell triggering receptor                                | NKTR       | 1,14 |
| solute carrier family 12 (potassium/chloride transporter),<br>member 7 | SLC12A7    | 1,14 |

|                                                                                                            |                                    |      |
|------------------------------------------------------------------------------------------------------------|------------------------------------|------|
| Memczak2013 ANTISENSE, coding, INTERNAL, intronic<br>best transcript NM_001024808                          | BCL7A                              | 1,14 |
| gametogenetin binding protein 2                                                                            | GGNBP2                             | 1,14 |
| collagen, type IV, alpha 4                                                                                 | COL4A4                             | 1,14 |
| regulating synaptic membrane exocytosis 1                                                                  | RIMS1                              | 1,14 |
| interleukin 1 beta                                                                                         | IL1B                               | 1,14 |
| mucin 5B, oligomeric mucus/gel-forming                                                                     | MUC5B                              | 1,14 |
| butyrophilin-like 3                                                                                        | BTNL3                              | 1,14 |
| zinc finger protein 558                                                                                    | ZNF558                             | 1,14 |
| dihydrouridine synthase 3-like                                                                             | DUS3L                              | 1,14 |
| nucleoporin 93kDa                                                                                          | NUP93                              | 1,14 |
| ankyrin repeat domain 20 family, member A4                                                                 | ANKRD20A4                          | 1,14 |
| H2A histone family, member Z                                                                               | H2AFZ                              | 1,14 |
| Fc receptor-like 4                                                                                         | FCRL4                              | 1,14 |
| extended synaptotagmin-like protein 3                                                                      | ESYT3                              | 1,14 |
| chromosome 19 open reading frame 48; small nucleolar<br>RNA, C/D box 88B; small nucleolar RNA, C/D box 88C | C19orf48;<br>SNORD88B;<br>SNORD88C | 1,14 |
| cytochrome P450, family 2, subfamily A, polypeptide 13                                                     | CYP2A13                            | 1,14 |
| theg spermatid protein-like                                                                                | THEGL                              | 1,14 |
| glypican 2                                                                                                 | GPC2                               | 1,14 |
| Transcript Identified by AceView, Entrez Gene ID(s) 9229                                                   | DLGAP1                             | 1,14 |
| chromosome 16 open reading frame 92                                                                        | C16orf92                           | 1,14 |
| SH2 domain containing 1B                                                                                   | SH2D1B                             | 1,14 |
| SPRY domain containing 4                                                                                   | SPRYD4                             | 1,14 |
| keratin associated protein 1-4                                                                             | KRTAP1-4                           | 1,14 |
| early B-cell factor 3                                                                                      | EBF3                               | 1,14 |
| Transcript Identified by AceView, Entrez Gene ID(s) 79875                                                  | THSD4                              | 1,14 |
| hyaluronoglucosaminidase 4                                                                                 | HYAL4                              | 1,14 |
| nuclear VCP-like                                                                                           | NVL                                | 1,14 |
| gamma-aminobutyric acid (GABA) A receptor, alpha 5                                                         | GABRA5                             | 1,14 |
| signal-regulatory protein beta 1                                                                           | SIRPB1                             | 1,14 |
| WD repeat and FYVE domain containing 1                                                                     | WDFY1                              | 1,14 |
| SKI family transcriptional corepressor 2                                                                   | SKOR2                              | 1,14 |
| sex comb on midleg-like 4 (Drosophila)                                                                     | SCML4                              | 1,14 |
| proline-rich transmembrane protein 4                                                                       | PRRT4                              | 1,14 |
| coiled-coil domain containing 106                                                                          | CCDC106                            | 1,14 |
| developmental pluripotency associated 5                                                                    | DPPA5                              | 1,14 |
| solute carrier organic anion transporter family, member<br>1C1                                             | SLCO1C1                            | 1,14 |
| aurora kinase C                                                                                            | AURKC                              | 1,14 |
| SH3 domain binding glutamate-rich protein like                                                             | SH3BGRL                            | 1,14 |
| TLC domain containing 2                                                                                    | TLCD2                              | 1,14 |

|                                                                                    |                |      |
|------------------------------------------------------------------------------------|----------------|------|
| hemoglobin, theta 1                                                                | HBQ1           | 1,14 |
| sialic acid binding Ig-like lectin 10                                              | SIGLEC10       | 1,14 |
| PRAME family member 18                                                             | PRAMEF18       | 1,14 |
| N-acetylglucosamine-1-phosphate transferase, gamma subunit                         | GNPTG          | 1,14 |
| secretoglobin, family 1D, member 4                                                 | SCGB1D4        | 1,14 |
| colony stimulating factor 1 receptor                                               | CSF1R          | 1,14 |
| keratin 9, type I                                                                  | KRT9           | 1,14 |
| dentin sialophosphoprotein                                                         | DSPP           | 1,14 |
| WBP2 N-terminal like                                                               | WBP2NL         | 1,14 |
| nudix hydrolase 6                                                                  | NUDT6          | 1,14 |
| nitric oxide synthase 1 (neuronal)                                                 | NOS1           | 1,14 |
| amyloid beta (A4) precursor-like protein 1                                         | APLP1          | 1,14 |
| golgin A6 family-like 6                                                            | GOLGA6L6       | 1,14 |
| zinc finger protein 416                                                            | ZNF416         | 1,14 |
| establishment of sister chromatid cohesion N-acetyltransferase 2                   | ESCO2          | 1,14 |
| zinc finger protein 492                                                            | ZNF492         | 1,14 |
| phosphatidylinositol glycan anchor biosynthesis class B                            | PIGB           | 1,14 |
| centrosomal protein 152kDa                                                         | CEP152         | 1,14 |
| growth hormone releasing hormone receptor                                          | GHRHR          | 1,14 |
| coiled-coil domain containing 151                                                  | CCDC151        | 1,14 |
| gap junction protein beta 6                                                        | GJB6           | 1,14 |
| death domain containing 1                                                          | DTHD1          | 1,14 |
| sorting nexin 6                                                                    | SNX6           | 1,14 |
| family with sequence similarity 196, member B                                      | FAM196B        | 1,14 |
| diacylglycerol kinase, epsilon 64kDa                                               | DGKE           | 1,14 |
| protein phosphatase, EF-hand calcium binding domain 1                              | PPEF1          | 1,14 |
| keratin associated protein 22-2                                                    | KRTAP22-2      | 1,14 |
| zinc finger protein 595                                                            | ZNF595         | 1,14 |
| GA binding protein transcription factor, beta subunit 1                            | GABPB1         | 1,14 |
| ST20 antisense RNA 1                                                               | ST20-AS1       | 1,14 |
| gap junction protein alpha 3                                                       | GJA3           | 1,14 |
| EF-hand calcium binding domain 7; deleted in lymphocytic leukemia 2-like           | EFCAB7; DLEU2L | 1,14 |
| ubiquitin-fold modifier conjugating enzyme 1                                       | UFC1           | 1,14 |
| NTPase, KAP family P-loop domain containing 1                                      | NKPD1          | 1,14 |
| transmembrane protein 119                                                          | TMEM119        | 1,14 |
| ATPase, H <sup>+</sup> /K <sup>+</sup> transporting, nongastric, alpha polypeptide | ATP12A         | 1,14 |
| epoxide hydrolase 1, microsomal (xenobiotic)                                       | EPHX1          | 1,14 |
| eukaryotic translation initiation factor 4E                                        | EIF4E          | 1,14 |
| asunder spermatogenesis regulator                                                  | ASUN           | 1,14 |
| interleukin 15                                                                     | IL15           | 1,14 |
| decapping mRNA 1B                                                                  | DCP1B          | 1,14 |

|                                                                                                                                                                           |                        |      |
|---------------------------------------------------------------------------------------------------------------------------------------------------------------------------|------------------------|------|
| solute carrier family 52 (riboflavin transporter), member 2                                                                                                               | SLC52A2                | 1,14 |
| T-box 19                                                                                                                                                                  | TBX19                  | 1,14 |
| brain expressed X-linked 4                                                                                                                                                | BEX4                   | 1,14 |
| ribonuclease, RNase A family, 3                                                                                                                                           | RNASE3                 | 1,14 |
| ribosomal protein S6 kinase, 90kDa, polypeptide 1                                                                                                                         | RPS6KA1                | 1,14 |
| small integral membrane protein 21                                                                                                                                        | SMIM21                 | 1,14 |
| phospholipase A2, group IVE                                                                                                                                               | PLA2G4E                | 1,14 |
| matrix metalloproteinase 26                                                                                                                                               | MMP26                  | 1,14 |
| lectin, galactoside-binding, soluble, 7; lectin, galactoside-binding, soluble, 7B                                                                                         | LGALS7; LGALS7B        | 1,14 |
| proteasome 26S subunit, non-ATPase 5                                                                                                                                      | PSMD5                  | 1,14 |
| V-set and transmembrane domain containing 2A; VSTM2A overlapping transcript 1                                                                                             | VSTM2A; VSTM2A-OT1     | 1,14 |
| solute carrier family 7 (cationic amino acid transporter, y+ system), member 3                                                                                            | SLC7A3                 | 1,14 |
| tyrosine hydroxylase                                                                                                                                                      | TH                     | 1,14 |
| spermatogenesis and oogenesis specific basic helix-loop-helix 2                                                                                                           | SOHLH2                 | 1,14 |
| essential meiotic structure-specific endonuclease 1                                                                                                                       | EME1                   | 1,14 |
| inositol(myo)-1(or 4)-monophosphatase 1                                                                                                                                   | IMPA1                  | 1,14 |
| zinc finger, matrin-type 5                                                                                                                                                | ZMAT5                  | 1,14 |
| conserved helix-loop-helix ubiquitous kinase                                                                                                                              | CHUK                   | 1,14 |
| RNA binding motif protein, Y-linked, family 1, member E; RNA binding motif protein, Y-linked, family 1, member D; RNA binding motif protein, Y-linked, family 1, member B | RBMY1E; RBMY1D; RBMY1B | 1,14 |
| LY6/PLAUR domain containing 4                                                                                                                                             | LYPD4                  | 1,14 |
| proline rich 23 domain containing 2; proline rich 23 domain containing 1                                                                                                  | PRR23D2; PRR23D1       | 1,14 |
| fuzzy planar cell polarity protein                                                                                                                                        | FUZ                    | 1,14 |
| STT3B, subunit of the oligosaccharyltransferase complex (catalytic)                                                                                                       | STT3B                  | 1,14 |
| RUN domain containing 1                                                                                                                                                   | RUNDC1                 | 1,14 |
| NudC domain containing 3                                                                                                                                                  | NUDCD3                 | 1,14 |
| CWF19-like 1, cell cycle control (S. pombe); small nucleolar RNA, H/ACA box 12                                                                                            | CWF19L1; SNORA12       | 1,14 |
| neurotensin                                                                                                                                                               | NTS                    | 1,14 |
| thymocyte selection associated family member 2                                                                                                                            | THEMIS2                | 1,14 |
| gamma-aminobutyric acid (GABA) A receptor, beta 2                                                                                                                         | GABRB2                 | 1,14 |
| ribonuclease P/MRP 38kDa subunit                                                                                                                                          | RPP38                  | 1,14 |
| olfactory receptor, family 4, subfamily P, member 4                                                                                                                       | OR4P4                  | 1,14 |
| Mab-21 domain containing 1                                                                                                                                                | MB21D1                 | 1,14 |
| zinc finger protein 699                                                                                                                                                   | ZNF699                 | 1,14 |
| fibroblast growth factor 4                                                                                                                                                | FGF4                   | 1,14 |

|                                                                                                                                                                                                        |                    |      |
|--------------------------------------------------------------------------------------------------------------------------------------------------------------------------------------------------------|--------------------|------|
| plexin B3                                                                                                                                                                                              | PLXNB3             | 1,14 |
| premature ovarian failure, 1B                                                                                                                                                                          | POF1B              | 1,14 |
| zinc finger protein 786                                                                                                                                                                                | ZNF786             | 1,14 |
| tetratricopeptide repeat domain 34                                                                                                                                                                     | TTC34              | 1,14 |
| olfactory receptor, family 8, subfamily H, member 3                                                                                                                                                    | OR8H3              | 1,14 |
| Charcot-Leyden crystal protein pseudogene                                                                                                                                                              | LGALS17A           | 1,14 |
| PR domain containing 9                                                                                                                                                                                 | PRDM9              | 1,14 |
| chromosome 17 open reading frame 47                                                                                                                                                                    | C17orf47           | 1,14 |
| iron/zinc purple acid phosphatase-like protein; Iron/zinc purple acid phosphatase-like protein<br>[Source:UniProtKB/Swiss-Prot;Acc:Q6ZNF0]; Transcript Identified by AceView, Entrez Gene ID(s) 390928 | PAPL               | 1,14 |
| testis expressed 43                                                                                                                                                                                    | TEX43              | 1,14 |
| spectrin repeat containing, nuclear envelope 1                                                                                                                                                         | SYNE1              | 1,14 |
| lipase maturation factor 2                                                                                                                                                                             | LMF2               | 1,14 |
| suppressor of cytokine signaling 3                                                                                                                                                                     | SOCS3              | 1,14 |
| APEX nuclease (multifunctional DNA repair enzyme) 1                                                                                                                                                    | APEX1              | 1,14 |
| DnaJ (Hsp40) homolog, subfamily C, member 30                                                                                                                                                           | DNAJC30            | 1,14 |
| C1D nuclear receptor corepressor                                                                                                                                                                       | C1D                | 1,14 |
| Ras-related GTP binding B                                                                                                                                                                              | RRAGB              | 1,14 |
| splicing factor 3a subunit 3                                                                                                                                                                           | SF3A3              | 1,14 |
| chondrosarcoma associated gene 1                                                                                                                                                                       | CSAG1              | 1,14 |
| zinc finger protein 675                                                                                                                                                                                | ZNF675             | 1,14 |
| POTE ankyrin domain family, member H                                                                                                                                                                   | POTEH              | 1,14 |
| pantothenate kinase 2                                                                                                                                                                                  | PANK2              | 1,14 |
| lectin, galactoside-binding, soluble, 3 binding protein                                                                                                                                                | LGALS3BP           | 1,14 |
| 5-aminoimidazole-4-carboxamide ribonucleotide formyltransferase/IMP cyclohydrolase                                                                                                                     | ATIC               | 1,14 |
| Josephin domain containing 2                                                                                                                                                                           | JOSD2              | 1,14 |
| small nucleolar RNA, C/D box 89; ring finger protein 149                                                                                                                                               | SNORD89;<br>RNF149 | 1,14 |
| aprataxin                                                                                                                                                                                              | APTX               | 1,14 |
| nuclear pore complex interacting protein family, member B9                                                                                                                                             | NPIP9              | 1,14 |
| family with sequence similarity 149, member B1                                                                                                                                                         | FAM149B1           | 1,14 |
| family with sequence similarity 90, member A1                                                                                                                                                          | FAM90A1            | 1,14 |
| HRAS-like suppressor                                                                                                                                                                                   | HRASLS             | 1,14 |
| zinc finger CCCH-type containing 4                                                                                                                                                                     | ZC3H4              | 1,14 |
| histocompatibility (minor) HA-1                                                                                                                                                                        | HMHA1              | 1,14 |
| olfactory receptor, family 6, subfamily A, member 2                                                                                                                                                    | OR6A2              | 1,14 |
| TAF1 RNA polymerase II, TATA box binding protein (TBP)-associated factor, 250kDa                                                                                                                       | TAF1               | 1,14 |
| raftlin, lipid raft linker 1                                                                                                                                                                           | RFTN1              | 1,14 |
| aarF domain containing kinase 5                                                                                                                                                                        | ADCK5              | 1,14 |
| keratinocyte differentiation-associated protein                                                                                                                                                        | KRTDAP             | 1,14 |

|                                                                           |                               |      |
|---------------------------------------------------------------------------|-------------------------------|------|
| coiled-coil domain containing 157                                         | CCDC157                       | 1,14 |
| nuclear RNA export factor 2B; t-complex 11 family, X-linked 2             | NXF2B; TCP11X2                | 1,14 |
| microRNA 1247                                                             | MIR1247                       | 1,14 |
| COL18A1 antisense RNA 1                                                   | COL18A1-AS1                   | 1,14 |
| chromosome 9 open reading frame 62                                        | C9orf62                       | 1,14 |
| neutrophil cytosolic factor 4                                             | NCF4                          | 1,14 |
| laminin, gamma 2                                                          | LAMC2                         | 1,14 |
| SRY box 13                                                                | SOX13                         | 1,14 |
| RTF1 homolog, Paf1/RNA polymerase II complex component                    | RTF1                          | 1,14 |
| basic helix-loop-helix family, member e22                                 | BHLHE22                       | 1,14 |
| GAS6 antisense RNA 1                                                      | GAS6-AS1                      | 1,14 |
| transmembrane protein 167A                                                | TMEM167A                      | 1,14 |
| tubulin, alpha 3d                                                         | TUBA3D                        | 1,14 |
| family with sequence similarity 160, member B2                            | FAM160B2                      | 1,14 |
| potassium channel, inwardly rectifying subfamily J, member 8              | KCNJ8                         | 1,14 |
| glutamate rich 1                                                          | ERICH1                        | 1,14 |
| NADH dehydrogenase, subunit 3 (complex I)                                 | ND3                           | 1,14 |
| keratin associated protein 20-2                                           | KRTAP20-2                     | 1,14 |
| zinc finger protein 714; vomeronasal 1 receptor 81 pseudogene             | ZNF714;<br>VN1R81P            | 1,14 |
| transmembrane and tetratricopeptide repeat containing 2                   | TMTC2                         | 1,14 |
| guanine nucleotide binding protein (G protein), beta polypeptide 1        | GNB1                          | 1,14 |
| chemokine (C-X-C motif) ligand 14                                         | CXCL14                        | 1,14 |
| HYDIN, axonemal central pair apparatus protein                            | HYDIN                         | 1,14 |
| neuralized E3 ubiquitin protein ligase 1B                                 | NEURL1B                       | 1,14 |
| LanC lantibiotic synthetase component C-like 2 (bacterial)                | LANCL2                        | 1,14 |
| 5-hydroxytryptamine (serotonin) receptor 3E, ionotropic                   | HTR3E                         | 1,14 |
| unconventional SNARE in the ER 1 homolog (S. cerevisiae)                  | USE1                          | 1,14 |
| oncostatin M                                                              | OSM                           | 1,14 |
| autophagy related 2B                                                      | ATG2B                         | 1,14 |
| zinc finger protein 157                                                   | ZNF157                        | 1,14 |
| keratin associated protein 21-2                                           | KRTAP21-2                     | 1,14 |
| taste receptor, type 2, member 16                                         | TAS2R16                       | 1,13 |
| RNA methyltransferase like 1                                              | RNMTL1                        | 1,13 |
| spermatid perinuclear RNA binding protein; MIR600 host gene; microRNA 600 | STRBP;<br>MIR600HG;<br>MIR600 | 1,13 |
| trace amine associated receptor 3 (gene/pseudogene)                       | TAAR3                         | 1,13 |

|                                                                            |                |      |
|----------------------------------------------------------------------------|----------------|------|
| coiled-coil domain containing 159                                          | CCDC159        | 1,13 |
| dual specificity tyrosine-(Y)-phosphorylation regulated kinase 1B          | DYRK1B         | 1,13 |
| POTE ankyrin domain family, member G; POTE ankyrin domain family, member M | POTEG; POTEM   | 1,13 |
| GDNF family receptor alpha 1                                               | GFRA1          | 1,13 |
| centrosome and spindle pole associated protein 1                           | CSPP1          | 1,13 |
| synaptosome associated protein 23kDa                                       | SNAP23         | 1,13 |
| transcriptional regulating factor 1                                        | TRERF1         | 1,13 |
| centrosomal protein 126kDa                                                 | CEP126         | 1,13 |
| shroom family member 4                                                     | SHROOM4        | 1,13 |
| Rho GTPase activating protein 31                                           | ARHGAP31       | 1,13 |
| chromosome 8 open reading frame 48                                         | C8orf48        | 1,13 |
| proteasome activator subunit 4                                             | PSME4          | 1,13 |
| ribosomal protein L26-like 1                                               | RPL26L1        | 1,13 |
| anosmin 1                                                                  | ANOS1          | 1,13 |
| tetratricopeptide repeat domain 12                                         | TTC12          | 1,13 |
| WD repeat domain 5B                                                        | WDR5B          | 1,13 |
| G protein-coupled receptor 20                                              | GPR20          | 1,13 |
| persephin                                                                  | PSPN           | 1,13 |
| cytokine-dependent hematopoietic cell linker                               | CLNK           | 1,13 |
| vomer nasal 1 receptor 10 pseudogene                                       | VN1R10P        | 1,13 |
| calcium and integrin binding family member 4                               | CIB4           | 1,13 |
| hydroxypyruvate isomerase (putative)                                       | HYI            | 1,13 |
| thyroid adenoma associated                                                 | THADA          | 1,13 |
| ubiquitin specific peptidase 19                                            | USP19          | 1,13 |
| DnaJ (Hsp40) homolog, subfamily C, member 2                                | DNAJC2         | 1,13 |
| putative UPF0607 protein ENSP00000383144                                   | LOC100129307   | 1,13 |
| amylase, alpha 2B (pancreatic); actin gamma 1 pseudogene 4                 | AMY2B; ACTG1P4 | 1,13 |
| ring finger protein 215                                                    | RNF215         | 1,13 |
| vestigial-like family member 1                                             | VGLL1          | 1,13 |
| serpin peptidase inhibitor, clade B (ovalbumin), member 3                  | SERPINB3       | 1,13 |
| C-type lectin domain family 4, member D                                    | CLEC4D         | 1,13 |
| chromosome 8 open reading frame 86                                         | C8orf86        | 1,13 |
| inositol hexakisphosphate kinase 3                                         | IP6K3          | 1,13 |
| GS homeobox 1                                                              | GSX1           | 1,13 |
| kelch domain containing 7A                                                 | KLHDC7A        | 1,13 |
| adaptor-related protein complex 1, beta 1 subunit                          | AP1B1          | 1,13 |
| tektin 3                                                                   | TEKT3          | 1,13 |
| DEAD (Asp-Glu-Ala-Asp) box helicase 56                                     | DDX56          | 1,13 |
| ligand dependent nuclear receptor corepressor                              | LCOR           | 1,13 |
| SH2 domain containing 4B                                                   | SH2D4B         | 1,13 |
| sulfotransferase family 2B member 1                                        | SULT2B1        | 1,13 |



|                                                                                              |          |      |
|----------------------------------------------------------------------------------------------|----------|------|
| zinc finger protein 324                                                                      | ZNF324   | 1,13 |
| protease, serine 42                                                                          | PRSS42   | 1,13 |
| IZUMO family member 2                                                                        | IZUMO2   | 1,13 |
| MARVEL domain containing 1                                                                   | MARVELD1 | 1,13 |
| zinc finger, HIT-type containing 1                                                           | ZNHIT1   | 1,13 |
| chromosome 6 open reading frame 47                                                           | C6orf47  | 1,13 |
| angiopoietin like 3                                                                          | ANGPTL3  | 1,13 |
| cyclin-dependent kinase 8                                                                    | CDK8     | 1,13 |
| Memczak2013 ALT_ACCEPTOR, ALT_DONOR, coding, INTERNAL, intronic best transcript NM_001012478 | U2AF2    | 1,13 |
| ependymin related 1                                                                          | EPDR1    | 1,13 |
| zinc finger protein 239                                                                      | ZNF239   | 1,13 |
| gap junction protein beta 3                                                                  | GJB3     | 1,13 |
| ring finger and CHY zinc finger domain containing 1, E3 ubiquitin protein ligase             | RCHY1    | 1,13 |
| chaperonin containing TCP1, subunit 8 (theta)-like 2                                         | CCT8L2   | 1,13 |
| SRY box 14                                                                                   | SOX14    | 1,13 |
| epsin 1                                                                                      | EPN1     | 1,13 |
| codanin 1                                                                                    | CDAN1    | 1,13 |
| hook microtubule-tethering protein 3                                                         | HOOK3    | 1,13 |
| gamma-aminobutyric acid (GABA) A receptor, alpha 4                                           | GABRA4   | 1,13 |
| schlafen like 1                                                                              | SLFNL1   | 1,13 |
| proteasome subunit alpha 5                                                                   | PSMA5    | 1,13 |
| cyclin-dependent kinase 2 interacting protein                                                | CINP     | 1,13 |
| interleukin 3 receptor, alpha (low affinity)                                                 | IL3RA    | 1,13 |
| zinc binding alcohol dehydrogenase domain containing 2                                       | ZADH2    | 1,13 |
| Memczak2013 ALT_ACCEPTOR, ALT_DONOR, coding, INTERNAL, intronic best transcript NM_032493    | AP1M1    | 1,13 |
| lens epithelial protein                                                                      | LENEP    | 1,13 |
| transmembrane channel like 4                                                                 | TMC4     | 1,13 |
| integrator complex subunit 12                                                                | INTS12   | 1,13 |
| periostin, osteoblast specific factor                                                        | POSTN    | 1,13 |
| armadillo repeat containing 8                                                                | ARMC8    | 1,13 |
| WD repeat domain 92                                                                          | WDR92    | 1,13 |
| zinc finger protein 501 [Source:HGNC Symbol;Acc:HGNC:23717]                                  | ZNF501   | 1,13 |
| melatonin receptor 1B                                                                        | MTNR1B   | 1,13 |
| Zhang2013 ALT_ACCEPTOR, ALT_DONOR, coding, INTERNAL, intronic best transcript NM_001007      | RPS4X    | 1,13 |
| prostate transmembrane protein, androgen induced 1                                           | PMEPA1   | 1,13 |
| kinesin family member 25                                                                     | KIF25    | 1,13 |
| ankyrin repeat, SAM and basic leucine zipper domain containing 1                             | ASZ1     | 1,13 |
| coiled-coil domain containing 162, pseudogene                                                | CCDC162P | 1,13 |

|                                                                                                                  |                |      |
|------------------------------------------------------------------------------------------------------------------|----------------|------|
| CCDC169-SOHLH2 readthrough                                                                                       | CCDC169-SOHLH2 | 1,13 |
| leucine-rich repeat LGI family, member 2                                                                         | LGI2           | 1,13 |
| polymerase (DNA directed), alpha 2, accessory subunit                                                            | POLA2          | 1,13 |
| synaptotagmin like 1                                                                                             | SYTL1          | 1,13 |
| SET domain and mariner transposase fusion gene                                                                   | SETMAR         | 1,13 |
| methyl-CpG binding domain 4 DNA glycosylase                                                                      | MBD4           | 1,13 |
| PAN3 poly(A) specific ribonuclease subunit; RNA, U6 small nuclear 82, pseudogene                                 | PAN3; RNU6-82P | 1,13 |
| delta(4)-desaturase, sphingolipid 2                                                                              | DEGS2          | 1,13 |
| polymerase (RNA) II (DNA directed) polypeptide E, 25kDa                                                          | POLR2E         | 1,13 |
| G protein-coupled receptor 89B                                                                                   | GPR89B         | 1,13 |
| ER membrane protein complex subunit 2                                                                            | EMC2           | 1,13 |
| Fc fragment of IgG, low affinity IIc, receptor for (CD32) (gene/pseudogene)                                      | FCGR2C         | 1,13 |
| sema domain, immunoglobulin domain (Ig), transmembrane domain (TM) and short cytoplasmic domain, (semaphorin) 4D | SEMA4D         | 1,13 |
| sperm autoantigenic protein 17                                                                                   | SPA17          | 1,13 |
| SEC22 homolog A, vesicle trafficking protein                                                                     | SEC22A         | 1,13 |
| sema domain, immunoglobulin domain (Ig), short basic domain, secreted, (semaphorin) 3F                           | SEMA3F         | 1,13 |
| immature colon carcinoma transcript 1                                                                            | ICT1           | 1,13 |
| homeobox C12                                                                                                     | HOXC12         | 1,13 |
| proline rich 14-like                                                                                             | PRR14L         | 1,13 |
| zinc finger protein 800                                                                                          | ZNF800         | 1,13 |
| taste receptor, type 2, member 1                                                                                 | TAS2R1         | 1,13 |
| laminin, beta 1                                                                                                  | LAMB1          | 1,13 |
| mitochondrial E3 ubiquitin protein ligase 1                                                                      | MUL1           | 1,13 |
| solute carrier family 30 (zinc transporter), member 7                                                            | SLC30A7        | 1,13 |
| delta/notch like EGF repeat containing                                                                           | DNER           | 1,13 |
| N(alpha)-acetyltransferase 50, NatE catalytic subunit                                                            | NAA50          | 1,13 |
| phosphatase, orphan 1                                                                                            | PHOSPHO1       | 1,13 |
| zinc finger protein 502                                                                                          | ZNF502         | 1,13 |
| family with sequence similarity 206, member A                                                                    | FAM206A        | 1,13 |
| coiled-coil domain containing 67                                                                                 | CCDC67         | 1,13 |
| potassium channel, two pore domain subfamily K, member 16                                                        | KCNK16         | 1,13 |
| olfactory receptor, family 5, subfamily H, member 2                                                              | OR5H2          | 1,13 |
| malic enzyme 1, NADP(+)-dependent, cytosolic                                                                     | ME1            | 1,13 |
| syntaxin 19                                                                                                      | STX19          | 1,13 |
| biorientation of chromosomes in cell division 1-like 2                                                           | BOD1L2         | 1,13 |
| small proline-rich protein 3                                                                                     | SPRR3          | 1,13 |
| SWI/SNF related, matrix associated, actin dependent regulator of chromatin, subfamily a, member 5                | SMARCA5        | 1,13 |

|                                                                                                                                                                                   |                          |      |
|-----------------------------------------------------------------------------------------------------------------------------------------------------------------------------------|--------------------------|------|
| keratin 7, type II                                                                                                                                                                | KRT7                     | 1,13 |
| bone morphogenetic protein 7                                                                                                                                                      | BMP7                     | 1,13 |
| olfactory receptor, family 4, subfamily N, member 4;<br>olfactory receptor, family 4, subfamily N, member 3<br>pseudogene; olfactory receptor, family 4, subfamily M,<br>member 2 | OR4N4; OR4N3P;<br>OR4M2  | 1,13 |
| keratin associated protein 27-1                                                                                                                                                   | KRTAP27-1                | 1,13 |
| collagen-like tail subunit (single strand of homotrimer) of<br>asymmetric acetylcholinesterase                                                                                    | COLQ                     | 1,13 |
| glycoprotein hormone beta 5                                                                                                                                                       | GPHB5                    | 1,13 |
| zinc finger protein 224                                                                                                                                                           | ZNF224                   | 1,13 |
| dynactin 4 (p62)                                                                                                                                                                  | DCTN4                    | 1,13 |
| AI894139 pseudogene; Transcript Identified by AceView,<br>Entrez Gene ID(s) 155060                                                                                                | LOC155060;<br>ZNF783     | 1,13 |
| potassium channel, voltage gated Shab related subfamily<br>B, member 2                                                                                                            | KCNB2                    | 1,13 |
| RAS p21 protein activator 4                                                                                                                                                       | RASA4                    | 1,13 |
| MAS-related GPR, member G                                                                                                                                                         | MRGPRG                   | 1,13 |
| glutathione S-transferase theta 2 (gene/pseudogene)                                                                                                                               | GSTT2                    | 1,13 |
| frizzled class receptor 2                                                                                                                                                         | FZD2                     | 1,13 |
| SLIT-ROBO Rho GTPase activating protein 3                                                                                                                                         | SRGAP3                   | 1,13 |
| cytochrome P450, family 4, subfamily F, polypeptide 2                                                                                                                             | CYP4F2                   | 1,13 |
| proline and serine rich 1                                                                                                                                                         | PROSER1                  | 1,13 |
| cytochrome P450, family 2, subfamily D, polypeptide 6                                                                                                                             | CYP2D6                   | 1,13 |
| family with sequence similarity 204, member A                                                                                                                                     | FAM204A                  | 1,13 |
| microfibrillar associated protein 4                                                                                                                                               | MFAP4                    | 1,13 |
| tripartite motif containing 49D2; tripartite motif<br>containing 49D1                                                                                                             | TRIM49D2;<br>TRIM49D1    | 1,13 |
| growth arrest-specific 1                                                                                                                                                          | GAS1                     | 1,13 |
| Transcript Identified by AceView, Entrez Gene ID(s) 4798                                                                                                                          | NFRKB                    | 1,13 |
| glutamate receptor, ionotropic, N-methyl-D-aspartate 3A                                                                                                                           | GRIN3A                   | 1,13 |
| Memczak2013 ALT_ACCEPTOR, ALT_DONOR, coding,<br>INTERNAL, intronic best transcript NM_032792                                                                                      | ZBTB45                   | 1,13 |
| pappalysin 2                                                                                                                                                                      | PAPPA2                   | 1,13 |
| coiled-coil domain containing 153                                                                                                                                                 | CCDC153                  | 1,13 |
| TBC1 domain family member-like; TBC1 domain family,<br>member 3D [Source:HGNC Symbol;Acc:HGNC:28944]                                                                              | LOC101060389;<br>TBC1D3D | 1,13 |
| Bardet-Biedl syndrome 12                                                                                                                                                          | BBS12                    | 1,13 |
| homeobox D3                                                                                                                                                                       | HOXD3                    | 1,13 |
| solute carrier family 24 (sodium/potassium/calcium<br>exchanger), member 5                                                                                                        | SLC24A5                  | 1,13 |
| lin-9 DREAM MuvB core complex component                                                                                                                                           | LIN9                     | 1,13 |
| WAS/WASL interacting protein family, member 3                                                                                                                                     | WIPF3                    | 1,13 |

|                                                                                             |          |      |
|---------------------------------------------------------------------------------------------|----------|------|
| tRNA methyltransferase 2 homolog A                                                          | TRMT2A   | 1,13 |
| DIRAS family, GTP-binding RAS-like 3                                                        | DIRAS3   | 1,13 |
| eukaryotic translation initiation factor 3, subunit K                                       | EIF3K    | 1,13 |
| phosphatidylinositol-4-phosphate 5-kinase-like 1                                            | PIP5KL1  | 1,13 |
| G protein-coupled receptor 17                                                               | GPR17    | 1,13 |
| inositol polyphosphate-4-phosphatase type I A                                               | INPP4A   | 1,13 |
| lactate dehydrogenase B                                                                     | LDHB     | 1,13 |
| leukocyte immunoglobulin-like receptor, subfamily B<br>(with TM and ITIM domains), member 3 | LILRB3   | 1,13 |
| solute carrier family 22 (organic cation transporter),<br>member 1                          | SLC22A1  | 1,13 |
| acyloxyacyl hydrolase (neutrophil)                                                          | AOAH     | 1,13 |
| solute carrier family 5 (glucose activated ion channel),<br>member 4                        | SLC5A4   | 1,13 |
| threonine synthase-like 2                                                                   | THNSL2   | 1,13 |
| brain and acute leukemia, cytoplasmic                                                       | BAALC    | 1,13 |
| vacuolar protein sorting 36 homolog ( <i>S. cerevisiae</i> )                                | VPS36    | 1,13 |
| olfactory receptor, family 5, subfamily AN, member 1                                        | OR5AN1   | 1,13 |
| arylacetamide deacetylase-like 2                                                            | AADACL2  | 1,13 |
| sperm-tail PG-rich repeat containing 2                                                      | STPG2    | 1,13 |
| Memczak2013 ANTISENSE, CDS, coding, INTERNAL best<br>transcript NM_001145304                | KIAA1683 | 1,13 |
| myosin, heavy chain 3, skeletal muscle, embryonic                                           | MYH3     | 1,13 |
| 6-pyruvoyltetrahydropterin synthase                                                         | PTS      | 1,13 |
| ovochoymase 2 (gene/pseudogene)                                                             | OVCH2    | 1,13 |
| craniofacial development protein 1                                                          | CFDP1    | 1,13 |
| threonyl-tRNA synthetase                                                                    | TARS     | 1,13 |
| killer cell lectin-like receptor subfamily G, member 2                                      | KLRG2    | 1,13 |
| ROS proto-oncogene 1 , receptor tyrosine kinase                                             | ROS1     | 1,13 |
| ribosomal protein S6 kinase, 90kDa, polypeptide 1                                           | RPS6KA1  | 1,13 |
| FYVE, RhoGEF and PH domain containing 2                                                     | FGD2     | 1,13 |
| zinc finger and SCAN domain containing 18                                                   | ZSCAN18  | 1,13 |
| sperm acrosome associated 5                                                                 | SPACA5   | 1,13 |
| extracellular leucine-rich repeat and fibronectin type III<br>domain containing 1           | ELFN1    | 1,13 |
| SH3-domain GRB2-like 1                                                                      | SH3GL1   | 1,13 |
| aquaporin 10                                                                                | AQP10    | 1,13 |
| G protein-coupled receptor 27                                                               | GPR27    | 1,13 |
| EPS8-like 1                                                                                 | EPS8L1   | 1,13 |
| retinoic acid early transcript 1L                                                           | RAET1L   | 1,13 |
| protein kinase N3                                                                           | PKN3     | 1,13 |

|                                                                                                                                                                                                                                                                          |                                 |      |
|--------------------------------------------------------------------------------------------------------------------------------------------------------------------------------------------------------------------------------------------------------------------------|---------------------------------|------|
| POTE ankyrin domain family member D-like; Synthetic construct Homo sapiens clone IMAGE:100066427, MGC:195564 POTE ankyrin domain family, member D (POTED) mRNA, encodes complete protein.; uncharacterized protein LOC100288966 [Source:RefSeq peptide;Acc:NP_001244291] | LOC100288966; POTED; BX072566.1 | 1,13 |
| HIV-1 Tat interactive protein 2                                                                                                                                                                                                                                          | HTATIP2                         | 1,13 |
| transmembrane protein 71                                                                                                                                                                                                                                                 | TMEM71                          | 1,13 |
| histocompatibility (minor) serpin domain containing                                                                                                                                                                                                                      | HMSD                            | 1,13 |
| DnaJ (Hsp40) homolog, subfamily C, member 15                                                                                                                                                                                                                             | DNAJC15                         | 1,13 |
| uncharacterized LOC442028; Transcript Identified by AceView, Entrez Gene ID(s) 729171                                                                                                                                                                                    | LOC442028; ANKRD20B             | 1,13 |
| papilin, proteoglycan-like sulfated glycoprotein                                                                                                                                                                                                                         | PAPLN                           | 1,13 |
| olfactory receptor, family 10, subfamily Q, member 1                                                                                                                                                                                                                     | OR10Q1                          | 1,13 |
| glutamate receptor, ionotropic, N-methyl D-aspartate 2A                                                                                                                                                                                                                  | GRIN2A                          | 1,13 |
| zinc finger and BTB domain containing 42                                                                                                                                                                                                                                 | ZBTB42                          | 1,13 |
| family with sequence similarity 71, member D                                                                                                                                                                                                                             | FAM71D                          | 1,12 |
| synaptopodin 2-like                                                                                                                                                                                                                                                      | SYNPO2L                         | 1,12 |
| Bardet-Biedl syndrome 10                                                                                                                                                                                                                                                 | BBS10                           | 1,12 |
| olfactory receptor, family 3, subfamily A, member 1                                                                                                                                                                                                                      | OR3A1                           | 1,12 |
| PRKC, apoptosis, WT1, regulator                                                                                                                                                                                                                                          | PAWR                            | 1,12 |
| ankyrin repeat domain 13C                                                                                                                                                                                                                                                | ANKRD13C                        | 1,12 |
| ZNF32 antisense RNA 3                                                                                                                                                                                                                                                    | ZNF32-AS3                       | 1,12 |
| zinc finger protein 688                                                                                                                                                                                                                                                  | ZNF688                          | 1,12 |
| Zhang2013 ALT_ACCEPTOR, ALT_DONOR, coding, INTERNAL, intronic best transcript NM_133374                                                                                                                                                                                  | ZNF618                          | 1,12 |
| S100 calcium binding protein B                                                                                                                                                                                                                                           | S100B                           | 1,12 |
| undifferentiated embryonic cell transcription factor 1                                                                                                                                                                                                                   | UTF1                            | 1,12 |
| von Willebrand factor A domain containing 2                                                                                                                                                                                                                              | VWA2                            | 1,12 |
| ATPase, Na <sup>+</sup> /K <sup>+</sup> transporting, alpha 2 polypeptide                                                                                                                                                                                                | ATP1A2                          | 1,12 |
| uncharacterized LOC339803; Transcript Identified by AceView, Entrez Gene ID(s) 339803; novel transcript                                                                                                                                                                  | LOC339803; AC016747.3           | 1,12 |
| chromosome 9 open reading frame 152                                                                                                                                                                                                                                      | C9orf152                        | 1,12 |
| cysteine-rich secretory protein LCCL domain containing 2                                                                                                                                                                                                                 | CRISPLD2                        | 1,12 |
| GTPase activating protein (SH3 domain) binding protein 2                                                                                                                                                                                                                 | G3BP2                           | 1,12 |
| cyclin-dependent kinase inhibitor 1C (p57, Kip2)                                                                                                                                                                                                                         | CDKN1C                          | 1,12 |
| olfactory receptor, family 10, subfamily J, member 4 (gene/pseudogene) [Source:HGNC Symbol;Acc:HGNC:15408]                                                                                                                                                               | OR10J4                          | 1,12 |
| serine peptidase inhibitor, Kunitz type, 3                                                                                                                                                                                                                               | SPINT3                          | 1,12 |
| VPS35 retromer complex component                                                                                                                                                                                                                                         | VPS35                           | 1,12 |
| ring finger protein 113B                                                                                                                                                                                                                                                 | RNF113B                         | 1,12 |

|                                                                                                              |                         |      |
|--------------------------------------------------------------------------------------------------------------|-------------------------|------|
| protein tyrosine phosphatase, receptor type, A; vacuolar protein sorting 16 homolog ( <i>S. cerevisiae</i> ) | PTPRA; VPS16            | 1,12 |
| potassium channel, voltage gated subfamily E regulatory beta subunit 2                                       | KCNE2                   | 1,12 |
| cystatin 11                                                                                                  | CST11                   | 1,12 |
| solute carrier family 5 (sodium/choline cotransporter), member 7                                             | SLC5A7                  | 1,12 |
| zinc finger protein 322                                                                                      | ZNF322                  | 1,12 |
| CD70 molecule                                                                                                | CD70                    | 1,12 |
| neurensin 2                                                                                                  | NRSN2                   | 1,12 |
| neuromedin U                                                                                                 | NMU                     | 1,12 |
| leucine-rich repeats and transmembrane domains 2                                                             | LRTM2                   | 1,12 |
| chromosome 4 open reading frame 33                                                                           | C4orf33                 | 1,12 |
| jumonji domain containing 8                                                                                  | JMJD8                   | 1,12 |
| cytochrome P450, family 2, subfamily D, polypeptide 6                                                        | CYP2D6                  | 1,12 |
| olfactory receptor, family 2, subfamily H, member 1                                                          | OR2H1                   | 1,12 |
| Transcript Identified by AceView, Entrez Gene ID(s) 3069                                                     | HDLBP                   | 1,12 |
| ZW10 interacting kinetochore protein                                                                         | ZWINT                   | 1,12 |
| GLI family zinc finger 1                                                                                     | GLI1                    | 1,12 |
| ArfGAP with RhoGAP domain, ankyrin repeat and PH domain 3                                                    | ARAP3                   | 1,12 |
| homeobox B1                                                                                                  | HOXB1                   | 1,12 |
| CUGBP, Elav-like family member 6                                                                             | CELF6                   | 1,12 |
| potassium channel, voltage gated eag related subfamily H, member 5                                           | KCNH5                   | 1,12 |
| upper zone of growth plate and cartilage matrix associated                                                   | UCMA                    | 1,12 |
| solute carrier family 37, member 3                                                                           | SLC37A3                 | 1,12 |
| upstream transcription factor 2, c-fos interacting                                                           | USF2                    | 1,12 |
| C-type lectin domain family 19, member A                                                                     | CLEC19A                 | 1,12 |
| glutaminyl-tRNA synthase (glutamine-hydrolyzing)-like 1                                                      | QRSL1                   | 1,12 |
| defensin, beta 104A; defensin, beta 104B                                                                     | DEFB104A;<br>DEFB104B   | 1,12 |
| Transcript Identified by AceView, Entrez Gene ID(s) 148753; novel transcript                                 | RP11-12M5.1;<br>FAM163A | 1,12 |
| leucine rich repeat containing 14B                                                                           | LRRC14B                 | 1,12 |
| neurexophilin 4                                                                                              | NXPH4                   | 1,12 |
| mitogen-activated protein kinase binding protein 1                                                           | MAPKBP1                 | 1,12 |
| leucine rich repeat containing 37, member A2                                                                 | LRRC37A2                | 1,12 |
| forkhead-associated (FHA) phosphopeptide binding domain 1                                                    | FHAD1                   | 1,12 |
| cytochrome b5 reductase 2                                                                                    | CYB5R2                  | 1,12 |
| polypeptide N-acetylgalactosaminyltransferase 14                                                             | GALNT14                 | 1,12 |

|                                                                                                                                                                                                                                                                                                      |                                |      |
|------------------------------------------------------------------------------------------------------------------------------------------------------------------------------------------------------------------------------------------------------------------------------------------------------|--------------------------------|------|
| ubiquinol-cytochrome c reductase complex III subunit VII                                                                                                                                                                                                                                             | UQCRCQ                         | 1,12 |
| autophagy related 16-like 1                                                                                                                                                                                                                                                                          | ATG16L1                        | 1,12 |
| MAGE family member B16                                                                                                                                                                                                                                                                               | MAGEB16                        | 1,12 |
| heat shock 70kDa protein 9 (mortalin)                                                                                                                                                                                                                                                                | HSPA9                          | 1,12 |
| cyclin G associated kinase                                                                                                                                                                                                                                                                           | GAK                            | 1,12 |
| late cornified envelope 3C                                                                                                                                                                                                                                                                           | LCE3C                          | 1,12 |
| prominin 2                                                                                                                                                                                                                                                                                           | PROM2                          | 1,12 |
| doublecortin domain containing 2B                                                                                                                                                                                                                                                                    | DCDC2B                         | 1,12 |
| Transcript Identified by AceView, Entrez Gene ID(s) 816                                                                                                                                                                                                                                              | CAMK2B                         | 1,12 |
| family with sequence similarity 231, member C; family with sequence similarity 231, member A                                                                                                                                                                                                         | FAM231C;<br>FAM231A            | 1,12 |
| tumor necrosis factor receptor superfamily, member 4                                                                                                                                                                                                                                                 | TNFRSF4                        | 1,12 |
| Transcript Identified by AceView, Entrez Gene ID(s) 9697                                                                                                                                                                                                                                             | TRAM2                          | 1,12 |
| zinc finger CCCH-type containing 10                                                                                                                                                                                                                                                                  | ZC3H10                         | 1,12 |
| Transcript Identified by AceView, Entrez Gene ID(s) 100133204; Salzman2013 ANTISENSE, CDS, coding, downstream_end, intronic, OVCODE, OVERLAPTX, OVEXON, UTR3 best transcript NM_032303; chromosome 9 open reading frame 147; chromosome 9 open reading frame 147 [Source:HGNC Symbol;Acc:HGNC:31438] | C9orf147; HSDL2                | 1,12 |
| WD repeat and HMG-box DNA binding protein 1                                                                                                                                                                                                                                                          | WDHD1                          | 1,12 |
| hydroxymethylbilane synthase                                                                                                                                                                                                                                                                         | HMBS                           | 1,12 |
| phosphatidylinositol glycan anchor biosynthesis class A                                                                                                                                                                                                                                              | PIGA                           | 1,12 |
| crystallin gamma A                                                                                                                                                                                                                                                                                   | CRYGA                          | 1,12 |
| potassium channel subfamily M regulatory beta subunit 2                                                                                                                                                                                                                                              | KCNMB2                         | 1,12 |
| La ribonucleoprotein domain family, member 4B                                                                                                                                                                                                                                                        | LARP4B                         | 1,12 |
| ret finger protein-like 2                                                                                                                                                                                                                                                                            | RFPL2                          | 1,12 |
| zinc finger protein 766; microRNA 643                                                                                                                                                                                                                                                                | ZNF766; MIR643                 | 1,12 |
| microRNA 7162; golgin A2 pseudogene 6; mitochondrial poly(A) polymerase                                                                                                                                                                                                                              | MIR7162;<br>GOLGA2P6;<br>MTPAP | 1,12 |
| B-cell CLL/lymphoma 11A (zinc finger protein)                                                                                                                                                                                                                                                        | BCL11A                         | 1,12 |
| BH3-like motif containing, cell death inducer; mir-100-let-7a-2 cluster host gene                                                                                                                                                                                                                    | BLID; MIR100HG                 | 1,12 |
| NIMA-related kinase 11                                                                                                                                                                                                                                                                               | NEK11                          | 1,12 |
| ATPase, Cu++ transporting, alpha polypeptide                                                                                                                                                                                                                                                         | ATP7A                          | 1,12 |
| protease, serine, 12 (neurotrypsin, motopsin)                                                                                                                                                                                                                                                        | PRSS12                         | 1,12 |
| zinc finger protein 551                                                                                                                                                                                                                                                                              | ZNF551                         | 1,12 |
| NOP2/Sun domain family, member 5 pseudogene 1                                                                                                                                                                                                                                                        | NSUN5P1                        | 1,12 |
| phospholipase A2, group IVF                                                                                                                                                                                                                                                                          | PLA2G4F                        | 1,12 |

|                                                                                   |                      |      |
|-----------------------------------------------------------------------------------|----------------------|------|
| ADAM metallopeptidase with thrombospondin type 1 motif 16                         | ADAMTS16             | 1,12 |
| death-domain associated protein                                                   | DAXX                 | 1,12 |
| urotensin 2B                                                                      | UTS2B                | 1,12 |
| splA/ryanodine receptor domain and SOCS box containing 4                          | SPSB4                | 1,12 |
| SPATA31 subfamily D, member 4                                                     | SPATA31D4            | 1,12 |
| formyl peptide receptor 2                                                         | FPR2                 | 1,12 |
| MAP/microtubule affinity-regulating kinase 4                                      | MARK4                | 1,12 |
| synaptotagmin XII                                                                 | SYT12                | 1,12 |
| chromosome 9 open reading frame 142                                               | C9orf142             | 1,12 |
| chromogranin A                                                                    | CHGA                 | 1,12 |
| G protein-coupled receptor 89A                                                    | GPR89A               | 1,12 |
| Rho GTPase activating protein 10                                                  | ARHGAP10             | 1,12 |
| human immunodeficiency virus type I enhancer binding protein 3                    | HIVEP3               | 1,12 |
| regulating synaptic membrane exocytosis 3                                         | RIMS3                | 1,12 |
| apoptosis resistant E3 ubiquitin protein ligase 1                                 | AREL1                | 1,12 |
| solute carrier family 44, member 5                                                | SLC44A5              | 1,12 |
| potassium channel, voltage gated shaker related subfamily A, member 7             | KCNA7                | 1,12 |
| thiamine triphosphatase                                                           | THTPA                | 1,12 |
| Transcript Identified by AceView, Entrez Gene ID(s) 8328; novel transcript        | RP11-295G24.4; GFI1B | 1,12 |
| olfactory receptor, family 4, subfamily A, member 16                              | OR4A16               | 1,12 |
| FAST kinase domains 2                                                             | FASTKD2              | 1,12 |
| PRAME family member 25                                                            | PRAMEF25             | 1,12 |
| ADP-ribose/CDP-alcohol diphosphatase, manganese-dependent                         | ADPRM                | 1,12 |
| retinoic acid early transcript 1G                                                 | RAET1G               | 1,12 |
| olfactory receptor, family 51, subfamily B, member 6                              | OR51B6               | 1,12 |
| solute carrier family 9, subfamily B (NHA1, cation proton antiporter 1), member 1 | SLC9B1               | 1,12 |
| protease, serine 46                                                               | PRSS46               | 1,12 |
| peptidylglycine alpha-amidating monooxygenase                                     | PAM                  | 1,12 |
| B-cell CLL/lymphoma 7A                                                            | BCL7A                | 1,12 |
| ribosomal L1 domain containing 1                                                  | RSL1D1               | 1,12 |
| patched 1                                                                         | PTCH1                | 1,12 |
| protein phosphatase 1, regulatory subunit 21                                      | PPP1R21              | 1,12 |
| olfactory receptor, family 51, subfamily D, member 1                              | OR51D1               | 1,12 |
| REM2 and RAB-like small GTPase 1                                                  | RSG1                 | 1,12 |
| anaphase promoting complex subunit 7                                              | ANAPC7               | 1,12 |
| SH2 domain containing 6                                                           | SH2D6                | 1,12 |
| olfactory receptor, family 51, subfamily I, member 2                              | OR51I2               | 1,12 |



|                                                                                                               |                         |      |
|---------------------------------------------------------------------------------------------------------------|-------------------------|------|
| dpy-30 histone methyltransferase complex regulatory subunit                                                   | DPY30                   | 1,12 |
| proteasome 26S subunit, non-ATPase 11                                                                         | PSMD11                  | 1,12 |
| solute carrier family 17 (organic anion transporter), member 3; histone cluster 1, H2a, pseudogene 2          | SLC17A3;<br>HIST1H2APS2 | 1,12 |
| zinc finger protein 621                                                                                       | ZNF621                  | 1,12 |
| peptidoglycan recognition protein 4                                                                           | PGLYRP4                 | 1,12 |
| ST6 (alpha-N-acetyl-neuraminyl-2,3-beta-galactosyl-1,3)-N-acetylgalactosaminide alpha-2,6-sialyltransferase 1 | ST6GALNAC1              | 1,12 |
| beaded filament structural protein 2, phakinin                                                                | BFSP2                   | 1,12 |
| hydroxysteroid (11-beta) dehydrogenase 1-like; ribosomal protein L36                                          | HSD11B1L; RPL36         | 1,12 |
| kelch repeat and BTB (POZ) domain containing 12                                                               | KBTBD12                 | 1,12 |
| MT-RNR2-like 3                                                                                                | MTRNR2L3                | 1,12 |
| doublecortin domain containing 1                                                                              | DCDC1                   | 1,12 |
| armadillo repeat containing 7                                                                                 | ARMC7                   | 1,12 |
| RAB2A, member RAS oncogene family                                                                             | RAB2A                   | 1,12 |
| chromosome 8 open reading frame 34                                                                            | C8orf34                 | 1,12 |
| homeobox A1                                                                                                   | HOXA1                   | 1,12 |
| serine/arginine repetitive matrix 4                                                                           | SRRM4                   | 1,12 |
| cutA divalent cation tolerance homolog (E. coli)                                                              | CUTA                    | 1,12 |
| zinc finger protein 35                                                                                        | ZNF35                   | 1,12 |
| elongation factor RNA polymerase II-like 3                                                                    | ELL3                    | 1,12 |
| olfactory receptor, family 52, subfamily J, member 3                                                          | OR52J3                  | 1,12 |
| chondroitin polymerizing factor 2; microRNA 671                                                               | CHPF2; MIR671           | 1,12 |
| mesoderm posterior bHLH transcription factor 1                                                                | MESP1                   | 1,12 |
| trace amine associated receptor 9 (gene/pseudogene)                                                           | TAAR9                   | 1,12 |
| olfactory receptor, family 1, subfamily L, member 4                                                           | OR1L4                   | 1,12 |
| zinc finger protein 121                                                                                       | ZNF121                  | 1,12 |
| testis expressed 26                                                                                           | TEX26                   | 1,12 |
| prokineticin 1                                                                                                | PROK1                   | 1,12 |
| myosin, heavy chain 8, skeletal muscle, perinatal                                                             | MYH8                    | 1,12 |
| solute carrier family 35, member F1                                                                           | SLC35F1                 | 1,12 |
| chromosome 19 open reading frame 57                                                                           | C19orf57                | 1,12 |
| SHC SH2-domain binding protein 1-like                                                                         | SHCBP1L                 | 1,12 |
| mitogen-activated protein kinase kinase kinase 5                                                              | MAP3K5                  | 1,12 |
| olfactomedin 2                                                                                                | OLFM2                   | 1,12 |
| histone deacetylase 10                                                                                        | HDAC10                  | 1,12 |
| urotensin 2 receptor                                                                                          | UTS2R                   | 1,12 |
| plexin domain containing 2                                                                                    | PLXDC2                  | 1,12 |
| macrophage scavenger receptor 1                                                                               | MSR1                    | 1,12 |
| apoptotic chromatin condensation inducer 1                                                                    | ACIN1                   | 1,12 |
| ankyrin repeat and ubiquitin domain containing 1                                                              | ANKUB1                  | 1,12 |
| spermatogenesis associated 20                                                                                 | SPATA20                 | 1,12 |

|                                                                                                    |                             |      |
|----------------------------------------------------------------------------------------------------|-----------------------------|------|
| methyl-CpG binding domain protein 2                                                                | MBD2                        | 1,12 |
| tRNA methyltransferase 10B                                                                         | TRMT10B                     | 1,12 |
| integrin linked kinase                                                                             | ILK                         | 1,12 |
| late cornified envelope 1A                                                                         | LCE1A                       | 1,12 |
| Fc receptor-like 1                                                                                 | FCRL1                       | 1,12 |
| CDP-diacylglycerol synthase 1                                                                      | CDS1                        | 1,12 |
| transglutaminase 6                                                                                 | TGM6                        | 1,12 |
| regulating synaptic membrane exocytosis 4                                                          | RIMS4                       | 1,12 |
| leucine rich repeat containing 29                                                                  | LRRC29                      | 1,12 |
| leukocyte immunoglobulin-like receptor, subfamily A<br>(with TM domain), member 6                  | LILRA6                      | 1,12 |
| Transcript Identified by AceView, Entrez Gene ID(s) 3670                                           | ISL1                        | 1,12 |
| NFKB activating protein-like                                                                       | NKAPL                       | 1,12 |
| neurofilament, heavy polypeptide                                                                   | NEFH                        | 1,12 |
| achaete-scute family bHLH transcription factor 5                                                   | ASCL5                       | 1,12 |
| family with sequence similarity 184, member A                                                      | FAM184A                     | 1,12 |
| zinc finger protein 417                                                                            | ZNF417                      | 1,12 |
| protein phosphatase 1, regulatory subunit 3G                                                       | PPP1R3G                     | 1,12 |
| alkB homolog 1, histone H2A dioxygenase                                                            | ALKBH1                      | 1,12 |
| phosducin like 2                                                                                   | PDCL2                       | 1,12 |
| Ras suppressor protein 1                                                                           | RSU1                        | 1,12 |
| growth differentiation factor 3                                                                    | GDF3                        | 1,12 |
| zinc finger, BED-type containing 1                                                                 | ZBED1                       | 1,12 |
| dystrobrevin beta                                                                                  | DTNB                        | 1,12 |
| plastin 3                                                                                          | PLS3                        | 1,12 |
| pleckstrin homology domain containing, family G (with<br>RhoGef domain) member 5                   | PLEKHG5                     | 1,12 |
| chromosome 2 open reading frame 83                                                                 | C2orf83                     | 1,12 |
| enamelin                                                                                           | ENAM                        | 1,12 |
| spermatid maturation 1                                                                             | SPEM1                       | 1,12 |
| amelotin                                                                                           | AMTN                        | 1,12 |
| family with sequence similarity 171, member B                                                      | FAM171B                     | 1,12 |
| synovial sarcoma translocation gene on chromosome 18-<br>like 1                                    | SS18L1                      | 1,12 |
| leucine-rich pentatricopeptide repeat containing                                                   | LRPPRC                      | 1,12 |
| family with sequence similarity 27-like                                                            | FAM27L                      | 1,12 |
| thyroid hormone receptor interactor 12                                                             | TRIP12                      | 1,12 |
| transmembrane protein 150B                                                                         | TMEM150B                    | 1,12 |
| FLJ33360 protein; FLJ33360 protein<br>[Source:EntrezGene;Acc:401172]; putative novel<br>transcript | FLJ33360; CTD-<br>2324F15.2 | 1,12 |
| phosphoglucomutase 5                                                                               | PGM5                        | 1,12 |
| chymotrypsin C (caldecrin)                                                                         | CTRC                        | 1,12 |
| olfactory receptor, family 1, subfamily L, member 8                                                | OR1L8                       | 1,12 |

|                                                                                                                                                                                                                                                                                           |                                                      |      |
|-------------------------------------------------------------------------------------------------------------------------------------------------------------------------------------------------------------------------------------------------------------------------------------------|------------------------------------------------------|------|
| bromodomain containing 8                                                                                                                                                                                                                                                                  | BRD8                                                 | 1,12 |
| forkhead-associated (FHA) phosphopeptide binding domain 1                                                                                                                                                                                                                                 | FHAD1                                                | 1,12 |
| vanin 2                                                                                                                                                                                                                                                                                   | VNN2                                                 | 1,12 |
| clock circadian regulator                                                                                                                                                                                                                                                                 | CLOCK                                                | 1,12 |
| matrix metalloproteinase 12                                                                                                                                                                                                                                                               | MMP12                                                | 1,12 |
| matrix metalloproteinase 21                                                                                                                                                                                                                                                               | MMP21                                                | 1,11 |
| CD2-associated protein                                                                                                                                                                                                                                                                    | CD2AP                                                | 1,11 |
| acyl-CoA synthetase bubblegum family member 1                                                                                                                                                                                                                                             | ACSBG1                                               | 1,11 |
| coiled-coil domain containing 84                                                                                                                                                                                                                                                          | CCDC84                                               | 1,11 |
| coiled-coil domain containing 141                                                                                                                                                                                                                                                         | CCDC141                                              | 1,11 |
| polymerase (RNA) II (DNA directed) polypeptide A, 220kDa                                                                                                                                                                                                                                  | POLR2A                                               | 1,11 |
| THO complex 3                                                                                                                                                                                                                                                                             | THOC3                                                | 1,11 |
| dehydrogenase/reductase (SDR family) member 7                                                                                                                                                                                                                                             | DHRS7                                                | 1,11 |
| Kazal-type serine peptidase inhibitor domain 1                                                                                                                                                                                                                                            | KAZALD1                                              | 1,11 |
| Homo sapiens TP53 target 3D (TP53TG3D), transcript variant 2, non-coding RNA.; TP53-target gene 3 protein; Homo sapiens TP53 target 3, mRNA (cDNA clone MGC:119889 IMAGE:40015196), complete cds.; Homo sapiens TP53 target 3, mRNA (cDNA clone MGC:119888 IMAGE:40015195), complete cds. | TP53TG3D;<br>LOC102723655;<br>TP53TG3;<br>AC136612.1 | 1,11 |
| myeloperoxidase                                                                                                                                                                                                                                                                           | MPO                                                  | 1,11 |
| cilia and flagella associated protein 77                                                                                                                                                                                                                                                  | CFAP77                                               | 1,11 |
| Epstein-Barr virus induced 3                                                                                                                                                                                                                                                              | EBI3                                                 | 1,11 |
| ameloblastin                                                                                                                                                                                                                                                                              | AMBN                                                 | 1,11 |
| family with sequence similarity 134, member B                                                                                                                                                                                                                                             | FAM134B                                              | 1,11 |
| UMODL1 antisense RNA 1                                                                                                                                                                                                                                                                    | UMODL1-AS1                                           | 1,11 |
| mediator complex subunit 21                                                                                                                                                                                                                                                               | MED21                                                | 1,11 |
| splicing regulatory glutamine/lysine-rich protein 1                                                                                                                                                                                                                                       | SREK1                                                | 1,11 |
| POTE ankyrin domain family, member C                                                                                                                                                                                                                                                      | POTEC                                                | 1,11 |
| RPTOR independent companion of MTOR, complex 2                                                                                                                                                                                                                                            | RICTOR                                               | 1,11 |
| opsin 5                                                                                                                                                                                                                                                                                   | OPN5                                                 | 1,11 |
| RAB6A, member RAS oncogene family                                                                                                                                                                                                                                                         | RAB6A                                                | 1,11 |
| methyltransferase like 1                                                                                                                                                                                                                                                                  | METTL1                                               | 1,11 |
| cartilage oligomeric matrix protein                                                                                                                                                                                                                                                       | COMP                                                 | 1,11 |
| tumor necrosis factor receptor superfamily, member 11b                                                                                                                                                                                                                                    | TNFRSF11B                                            | 1,11 |
| JAZF zinc finger 1                                                                                                                                                                                                                                                                        | JAZF1                                                | 1,11 |
| ral guanine nucleotide dissociation stimulator-like 3                                                                                                                                                                                                                                     | RGL3                                                 | 1,11 |
| Transcript Identified by AceView, Entrez Gene ID(s) 3551                                                                                                                                                                                                                                  | IKBKB                                                | 1,11 |
| uncharacterized LOC100129083; Transcript Identified by AceView, Entrez Gene ID(s) 100129083; novel transcript, antisense to SIGLEC10                                                                                                                                                      | LOC100129083;<br>CTD-2616J11.2                       | 1,11 |

|                                                                                                                                  |                      |      |
|----------------------------------------------------------------------------------------------------------------------------------|----------------------|------|
| marginal zone B and B1 cell-specific protein                                                                                     | MZB1                 | 1,11 |
| selectin L                                                                                                                       | SELL                 | 1,11 |
| SMG7 nonsense mediated mRNA decay factor                                                                                         | SMG7                 | 1,11 |
| TPTE and PTEN homologous inositol lipid phosphatase pseudogene; Transcript Identified by AceView, Entrez Gene ID(s) 1454; 400927 | LOC400927;<br>CSNK1E | 1,11 |
| actin gamma 1                                                                                                                    | ACTG1                | 1,11 |
| adaptor-related protein complex 3, sigma 1 subunit                                                                               | AP3S1                | 1,11 |
| ubiquitin conjugating enzyme E2Q family member 2-like                                                                            | UBE2Q2L              | 1,11 |
| serum amyloid A-like 1                                                                                                           | SAAL1                | 1,11 |
| cysteine and histidine rich domain containing 1                                                                                  | CHORDC1              | 1,11 |
| mitochondrial ribosomal protein L33                                                                                              | MRPL33               | 1,11 |
| vasoactive intestinal peptide                                                                                                    | VIP                  | 1,11 |
| interaction protein for cytohesin exchange factors 1                                                                             | IPCEF1               | 1,11 |
| transcription factor AP-2 delta (activating enhancer binding protein 2 delta)                                                    | TFAP2D               | 1,11 |
| parathyroid hormone 2                                                                                                            | PTH2                 | 1,11 |
| family with sequence similarity 25, member C                                                                                     | FAM25C               | 1,11 |
| defensin, beta 124                                                                                                               | DEFB124              | 1,11 |
| SEC14-like lipid binding 4                                                                                                       | SEC14L4              | 1,11 |
| ADP-ribosyltransferase 5                                                                                                         | ART5                 | 1,11 |
| peripherin                                                                                                                       | PRPH                 | 1,11 |
| Ras association and DIL domains                                                                                                  | RADIL                | 1,11 |
| ARP2 actin-related protein 2 homolog (yeast)                                                                                     | ACTR2                | 1,11 |
| v-maf avian musculoaponeurotic fibrosarcoma oncogene homolog G                                                                   | MAFG                 | 1,11 |
| retina and anterior neural fold homeobox 2                                                                                       | RAX2                 | 1,11 |
| gap junction protein beta 7                                                                                                      | GJB7                 | 1,11 |
| Transcript Identified by AceView, Entrez Gene ID(s) 11031                                                                        | RAB31                | 1,11 |
| solute carrier organic anion transporter family, member 2A1                                                                      | SLCO2A1              | 1,11 |
| Aly/REF export factor                                                                                                            | ALYREF               | 1,11 |
| Rap guanine nucleotide exchange factor 2                                                                                         | RAPGEF2              | 1,11 |
| olfactory receptor, family 10, subfamily A, member 2                                                                             | OR10A2               | 1,11 |
| coiled-coil domain containing 84                                                                                                 | CCDC84               | 1,11 |
| double C2-like domains, beta                                                                                                     | DOC2B                | 1,11 |
| adhesion G protein-coupled receptor F4                                                                                           | ADGRF4               | 1,11 |
| zinc finger protein 7                                                                                                            | ZNF7                 | 1,11 |
| solute carrier family 8 (sodium/calcium exchanger), member 1                                                                     | SLC8A1               | 1,11 |
| kalirin, RhoGEF kinase                                                                                                           | KALRN                | 1,11 |
| required for meiotic nuclear division 1 homolog                                                                                  | RMND1                | 1,11 |
| fibroblast growth factor receptor-like 1                                                                                         | FGFRL1               | 1,11 |

|                                                                                                                                             |               |      |
|---------------------------------------------------------------------------------------------------------------------------------------------|---------------|------|
| latent transforming growth factor beta binding protein 3                                                                                    | LTBP3         | 1,11 |
| adiponectin receptor 1                                                                                                                      | ADIPOR1       | 1,11 |
| long intergenic non-protein coding RNA 1600                                                                                                 | LINC01600     | 1,11 |
| chromosome 4 open reading frame 46                                                                                                          | C4orf46       | 1,11 |
| late cornified envelope 4A                                                                                                                  | LCE4A         | 1,11 |
| golgi-associated, gamma adaptin ear containing, ARF binding protein 3                                                                       | GGA3          | 1,11 |
| tankyrase 1 binding protein 1                                                                                                               | TNKS1BP1      | 1,11 |
| membrane-spanning 4-domains, subfamily A, member 13                                                                                         | MS4A13        | 1,11 |
| dermatan sulfate epimerase-like                                                                                                             | DSEL          | 1,11 |
| SH3-domain binding protein 2                                                                                                                | SH3BP2        | 1,11 |
| chromosome 2 open reading frame 61                                                                                                          | C2orf61       | 1,11 |
| phosphorylase kinase, gamma 2 (testis)                                                                                                      | PHKG2         | 1,11 |
| collagen, type XI, alpha 1                                                                                                                  | COL11A1       | 1,11 |
| membrane metallo-endopeptidase-like 1                                                                                                       | MMEL1         | 1,11 |
| olfactory receptor, family 5, subfamily B, member 21                                                                                        | OR5B21        | 1,11 |
| inositol-trisphosphate 3-kinase B                                                                                                           | ITPKB         | 1,11 |
| RUSC1 antisense RNA 1                                                                                                                       | RUSC1-AS1     | 1,11 |
| lymphocyte-specific protein 1; microRNA 7847                                                                                                | LSP1; MIR7847 | 1,11 |
| WD repeat domain 75                                                                                                                         | WDR75         | 1,11 |
| UDP-glucose 6-dehydrogenase                                                                                                                 | UGDH          | 1,11 |
| flavin containing monooxygenase 2                                                                                                           | FMO2          | 1,11 |
| dopamine receptor D1                                                                                                                        | DRD1          | 1,11 |
| gonadotropin releasing hormone receptor                                                                                                     | GNRHR         | 1,11 |
| sema domain, seven thrombospondin repeats (type 1 and type 1-like), transmembrane domain (TM) and short cytoplasmic domain, (semaphorin) 5B | SEMA5B        | 1,11 |
| Usher syndrome 2A (autosomal recessive, mild)                                                                                               | USH2A         | 1,11 |
| IKAROS family zinc finger 5                                                                                                                 | IKZF5         | 1,11 |
| leucine rich repeat neuronal 3                                                                                                              | LRRN3         | 1,11 |
| N-acetylated alpha-linked acidic dipeptidase-like 2                                                                                         | NAALADL2      | 1,11 |
| chromosome 5 open reading frame 51                                                                                                          | C5orf51       | 1,11 |
| transmembrane protein 130                                                                                                                   | TMEM130       | 1,11 |
| microtubule-associated protein, RP/EB family, member 1                                                                                      | MAPRE1        | 1,11 |
| phospholipase A2, group X                                                                                                                   | PLA2G10       | 1,11 |
| neuroglobin                                                                                                                                 | NGB           | 1,11 |
| dynein, axonemal, light intermediate chain 1                                                                                                | DNALI1        | 1,11 |
| chromosome 16 open reading frame 72-like                                                                                                    | LOC389895     | 1,11 |
| CNDP dipeptidase 2 (metallopeptidase M20 family)                                                                                            | CNDP2         | 1,11 |
| Rho GTPase activating protein 6                                                                                                             | ARHGAP6       | 1,11 |
| Memczak2013 ANTISENSE, coding, INTERNAL, UTR3 best transcript NM_014310                                                                     | RASD2         | 1,11 |

|                                                                                              |                     |      |
|----------------------------------------------------------------------------------------------|---------------------|------|
| oral cancer overexpressed 1                                                                  | ORAOV1              | 1,11 |
| DEAD (Asp-Glu-Ala-Asp) box helicase 21                                                       | DDX21               | 1,11 |
| olfactory receptor, family 4, subfamily D, member 10                                         | OR4D10              | 1,11 |
| oncomodulin                                                                                  | OCM                 | 1,11 |
| double homeobox 4 like 24; double homeobox 4 like 23                                         | DUX4L24;<br>DUX4L23 | 1,11 |
| double homeobox 4 like 22; double homeobox 4 like 21                                         | DUX4L22;<br>DUX4L21 | 1,11 |
| double homeobox 4 like 10; double homeobox 4 like 11                                         | DUX4L10;<br>DUX4L11 | 1,11 |
| BCL6 corepressor                                                                             | BCOR                | 1,11 |
| dihydrouridine synthase 4-like                                                               | DUS4L               | 1,11 |
| NADP-dependent oxidoreductase domain containing 1                                            | NOXRED1             | 1,11 |
| ribosomal protein S6 kinase, 90kDa, polypeptide 1                                            | RPS6KA1             | 1,11 |
| ubiquitin specific peptidase 32                                                              | USP32               | 1,11 |
| prickle homolog 1                                                                            | PRICKLE1            | 1,11 |
|                                                                                              | AC208162.1          | 1,11 |
| phosphodiesterase 10A                                                                        | PDE10A              | 1,11 |
| prostaglandin E receptor 4 (subtype EP4)                                                     | PTGER4              | 1,11 |
| interleukin 36, gamma                                                                        | IL36G               | 1,11 |
| AT-hook transcription factor                                                                 | AKNA                | 1,11 |
| PYD (pyrin domain) containing 1                                                              | PYDC1               | 1,11 |
| collagen, type I, alpha 2                                                                    | COL1A2              | 1,11 |
| fibrillarin                                                                                  | FBL                 | 1,11 |
| Transcript Identified by AceView, Entrez Gene ID(s) 84620                                    | ST6GAL2             | 1,11 |
| fasciculation and elongation protein zeta 1                                                  | FEZ1                | 1,11 |
| transmembrane BAX inhibitor motif containing 1;<br>microRNA 6513                             | TMBIM1;<br>MIR6513  | 1,11 |
| interleukin 22 receptor, alpha 2                                                             | IL22RA2             | 1,11 |
| zinc finger protein 155                                                                      | ZNF155              | 1,11 |
| aarF domain containing kinase 4                                                              | ADCK4               | 1,11 |
| Bardet-Biedl syndrome 4                                                                      | BBS4                | 1,11 |
| Memczak2013 ALT_ACCEPTOR, ALT_DONOR, coding,<br>INTERNAL, intronic best transcript NM_002806 | PSMC6               | 1,11 |
| peptidyl-tRNA hydrolase 2                                                                    | PTRH2               | 1,11 |
| molybdenum cofactor synthesis 1                                                              | MOCS1               | 1,11 |
| receptor accessory protein 3                                                                 | REEP3               | 1,11 |
| synaptotagmin IV                                                                             | SYT4                | 1,11 |
| Transcript Identified by AceView, Entrez Gene ID(s)<br>196527                                | ANO6                | 1,11 |
| RAD52 homolog, DNA repair protein                                                            | RAD52               | 1,11 |
| leucine rich repeat containing 8 family, member E                                            | LRRC8E              | 1,11 |
| RUN and FYVE domain containing 1                                                             | RUFY1               | 1,11 |
| MT-RNR2-like 9                                                                               | MTRNR2L9            | 1,11 |

|                                                                                     |                                         |      |
|-------------------------------------------------------------------------------------|-----------------------------------------|------|
| parvalbumin                                                                         | PVALB                                   | 1,11 |
| 5-hydroxytryptamine (serotonin) receptor 3A, ionotropic                             | HTR3A                                   | 1,11 |
| ankyrin repeat domain 31                                                            | ANKRD31                                 | 1,11 |
| dorsal root ganglia homeobox                                                        | DRGX                                    | 1,11 |
| defensin, beta 132                                                                  | DEFB132                                 | 1,11 |
| Memczak2013 ANTISENSE, coding, INTERNAL, intronic<br>best transcript NM_003335      | UBA7                                    | 1,11 |
| centriolar coiled coil protein 110kDa                                               | CCP110                                  | 1,11 |
| KIAA0907; small Cajal body-specific RNA 4                                           | KIAA0907;<br>SCARNA4                    | 1,11 |
| synaptophysin                                                                       | SYP                                     | 1,11 |
| adhesion G protein-coupled receptor G7                                              | ADGRG7                                  | 1,11 |
| potassium channel, two pore domain subfamily K,<br>member 12                        | KCNK12                                  | 1,11 |
| Rho-related BTB domain containing 3                                                 | RHOBTB3                                 | 1,11 |
| histone deacetylase 1                                                               | HDAC1                                   | 1,11 |
| frizzled class receptor 7                                                           | FZD7                                    | 1,11 |
| basonuclin 1                                                                        | BNC1                                    | 1,11 |
| chromosome 11 open reading frame 73                                                 | C11orf73                                | 1,11 |
| lectin, galactoside-binding, soluble, 12                                            | LGALS12                                 | 1,11 |
| Rieske (Fe-S) domain containing                                                     | RFESD                                   | 1,11 |
| MAGE family member B6                                                               | MAGEB6                                  | 1,11 |
| neuroblastoma breakpoint family, member 3                                           | NBPF3                                   | 1,11 |
| uncharacterized LOC100287728; Transcript Identified by<br>AceView; novel transcript | LOC100287728;<br>RP11-85L21.4;<br>jerva | 1,11 |
| lysozyme-like 4                                                                     | LYZL4                                   | 1,11 |
| surfactant protein B                                                                | SFTPB                                   | 1,11 |
| chromosome 8 open reading frame 89                                                  | C8orf89                                 | 1,11 |
| dynein, axonemal, heavy chain 12                                                    | DNAH12                                  | 1,11 |
| Rho GDP dissociation inhibitor (GDI) gamma                                          | ARHGDIG                                 | 1,11 |
| SR-related CTD-associated factor 4                                                  | SCAF4                                   | 1,11 |
| olfactory receptor, family 1, subfamily K, member 1                                 | OR1K1                                   | 1,11 |
| ficolin (collagen/fibrinogen domain containing) 3                                   | FCN3                                    | 1,11 |
| hydroxysteroid (17-beta) dehydrogenase 2                                            | HSD17B2                                 | 1,11 |
| zinc finger protein 474                                                             | ZNF474                                  | 1,11 |
| KIAA2012                                                                            | KIAA2012                                | 1,11 |
| RNA binding motif protein 28                                                        | RBM28                                   | 1,11 |
| kringle containing transmembrane protein 2                                          | KREMEN2                                 | 1,11 |
| COMM domain containing 8                                                            | COMMD8                                  | 1,11 |
| serpin peptidase inhibitor, clade B (ovalbumin), member<br>12                       | SERPINB12                               | 1,11 |
| neuro-oncological ventral antigen 2                                                 | NOVA2                                   | 1,11 |
| PAP associated domain containing 4                                                  | PAPD4                                   | 1,11 |
| GPR158 antisense RNA 1                                                              | GPR158-AS1                              | 1,11 |

|                                                                                               |                     |      |
|-----------------------------------------------------------------------------------------------|---------------------|------|
| polypeptide N-acetylgalactosaminyltransferase 5                                               | GALNT5              | 1,11 |
| Sad1 and UNC84 domain containing 1                                                            | SUN1                | 1,11 |
| olfactory receptor, family 6, subfamily C, member 1                                           | OR6C1               | 1,11 |
| SRY box 7                                                                                     | SOX7                | 1,11 |
| interleukin 34                                                                                | IL34                | 1,11 |
| ALX homeobox 1                                                                                | ALX1                | 1,11 |
| olfactory receptor, family 56, subfamily A, member 1                                          | OR56A1              | 1,11 |
| Memczak2013 ANTISENSE, coding, INTERNAL, intronic<br>best transcript NM_006947                | SRP72               | 1,11 |
| G protein-coupled receptor 45                                                                 | GPR45               | 1,11 |
| transmembrane protein 178B                                                                    | TMEM178B            | 1,11 |
| transcription factor CP2-like 1                                                               | TFCP2L1             | 1,11 |
| unc-5 netrin receptor C                                                                       | UNC5C               | 1,11 |
| ADP-ribosylation factor like GTPase 11                                                        | ARL11               | 1,11 |
| Zhang2013 ALT_ACCEPTOR, ALT_DONOR, coding,<br>INTERNAL, intronic best transcript NM_001033549 | BABAM1              | 1,11 |
| Jeck2013 ALT_ACCEPTOR, ALT_DONOR, coding,<br>INTERNAL, intronic best transcript NM_014629     | ARHGEF10            | 1,11 |
| lipin 3                                                                                       | LPIN3               | 1,11 |
| zinc finger CCCH-type containing 6                                                            | ZC3H6               | 1,11 |
| actin filament associated protein 1-like 1                                                    | AFAP1L1             | 1,11 |
| olfactory receptor, family 51, subfamily E, member 2                                          | OR51E2              | 1,11 |
| basic charge, Y-linked, 2B                                                                    | BPY2B               | 1,11 |
| olfactory receptor, family 1, subfamily J, member 2                                           | OR1J2               | 1,11 |
| zinc finger protein 549                                                                       | ZNF549              | 1,11 |
| olfactory receptor, family 10, subfamily A, member 5                                          | OR10A5              | 1,11 |
| Transcript Identified by AceView, Entrez Gene ID(s) 10587                                     | TXNRD2              | 1,11 |
| ribonuclease, RNase A family, 2 (liver, eosinophil-derived<br>neurotoxin)                     | RNASE2              | 1,11 |
| transcription factor 15 (basic helix-loop-helix)                                              | TCF15               | 1,11 |
| F-box and leucine-rich repeat protein 16                                                      | FBXL16              | 1,11 |
| transmembrane protein 196                                                                     | TMEM196             | 1,11 |
| cyclin G2                                                                                     | CCNG2               | 1,11 |
| neuronal PAS domain protein 1                                                                 | NPAS1               | 1,11 |
| LSM4 homolog, U6 small nuclear RNA and mRNA<br>degradation associated                         | LSM4                | 1,11 |
| thioredoxin reductase 3 neighbor; thioredoxin reductase 3                                     | TXNRD3NB;<br>TXNRD3 | 1,11 |
| HCLS1 binding protein 3                                                                       | HS1BP3              | 1,11 |
| TOX high mobility group box family member 2                                                   | TOX2                | 1,11 |
| family with sequence similarity 175, member A                                                 | FAM175A             | 1,11 |
| membrane-spanning 4-domains, subfamily A, member 3<br>(hematopoietic cell-specific)           | MS4A3               | 1,11 |
| kallikrein related peptidase 8                                                                | KLK8                | 1,11 |



|                                                                    |          |      |
|--------------------------------------------------------------------|----------|------|
| Bardet-Biedl syndrome 7                                            | BBS7     | 1,11 |
| solute carrier family 25 (S-adenosylmethionine carrier), member 26 | SLC25A26 | 1,11 |
| transmembrane protein 151A                                         | TMEM151A | 1,11 |
| ELOVL fatty acid elongase 5                                        | ELOVL5   | 1,11 |
| zinc finger protein 568                                            | ZNF568   | 1,11 |
| spinster homolog 2 (Drosophila)                                    | SPNS2    | 1,11 |
| ubiquitin protein ligase E3B                                       | UBE3B    | 1,11 |
| spindle apparatus coiled-coil protein 1                            | SPDL1    | 1,11 |
| glutamate receptor, metabotropic 4                                 | GRM4     | 1,11 |
| hes-related family bHLH transcription factor with YRPW motif-like  | HEYL     | 1,11 |
| junctional adhesion molecule 2                                     | JAM2     | 1,11 |
| F-box protein 40                                                   | FBXO40   | 1,11 |
| transmembrane protein 35                                           | TMEM35   | 1,11 |
| SCAN domain containing 2 pseudogene                                | SCAND2P  | 1,11 |
| interleukin 13                                                     | IL13     | 1,11 |
| EF-hand calcium binding domain 10                                  | EFCAB10  | 1,11 |
| cancer/testis antigen 62                                           | CT62     | 1,11 |
| receptor accessory protein 5                                       | REEP5    | 1,10 |
| 5-hydroxytryptamine (serotonin) receptor 6, G protein-coupled      | HTR6     | 1,10 |
| polypeptide N-acetylgalactosaminyltransferase-like 6               | GALNTL6  | 1,10 |
| hepatitis A virus cellular receptor 2                              | HAVCR2   | 1,10 |
| ligand dependent nuclear receptor interacting factor 1             | LRIF1    | 1,10 |
| solute carrier family 17 (acidic sugar transporter), member 5      | SLC17A5  | 1,10 |
| pannexin 2                                                         | PANX2    | 1,10 |
| olfactory receptor, family 9, subfamily A, member 4                | OR9A4    | 1,10 |
| cytohesin 4                                                        | CYTH4    | 1,10 |
| Transcript Identified by AceView, Entrez Gene ID(s) 9107           | MTMR6    | 1,10 |
| YKT6 v-SNARE homolog (S. cerevisiae)                               | YKT6     | 1,10 |
| family with sequence similarity 47, member B                       | FAM47B   | 1,10 |
| multimerin 2                                                       | MMRN2    | 1,10 |
| potassium channel, inwardly rectifying subfamily J, member 14      | KCNJ14   | 1,10 |
| zinc finger protein 571                                            | ZNF571   | 1,10 |
| ribosomal RNA processing 1                                         | RRP1     | 1,10 |
| dual oxidase maturation factor 1                                   | DUOXA1   | 1,10 |
| chibby homolog 3 (Drosophila)                                      | CBY3     | 1,10 |
| ankyrin repeat domain 19, pseudogene                               | ANKRD19P | 1,10 |
| acetoacetyl-CoA synthetase pseudogene 1                            | AACSP1   | 1,10 |
| chymotrypsin-like elastase family, member 2B                       | CELA2B   | 1,10 |
| chromosome 5 open reading frame 28                                 | C5orf28  | 1,10 |

|                                                                                           |               |      |
|-------------------------------------------------------------------------------------------|---------------|------|
| aquaporin 5                                                                               | AQP5          | 1,10 |
| spermatogenesis associated 22                                                             | SPATA22       | 1,10 |
| Rho GTPase activating protein 25                                                          | ARHGAP25      | 1,10 |
| vimentin                                                                                  | VIM           | 1,10 |
| Memczak2013 ALT_ACCEPTOR, ALT_DONOR, coding, INTERNAL, intronic best transcript NM_138799 | MBOAT2        | 1,10 |
| protein phosphatase 2, catalytic subunit, alpha isozyme                                   | PPP2CA        | 1,10 |
| interleukin 6                                                                             | IL6           | 1,10 |
| kelch domain containing 8A                                                                | KLHDC8A       | 1,10 |
| tRNA-yW synthesizing protein 5                                                            | TYW5          | 1,10 |
| olfactory receptor, family 2, subfamily B, member 2                                       | OR2B2         | 1,10 |
| glycoprotein integral membrane 1                                                          | GINM1         | 1,10 |
| HGF activator                                                                             | HGFAC         | 1,10 |
| hematopoietic prostaglandin D synthase                                                    | HPGDS         | 1,10 |
| BTB (POZ) domain containing 19                                                            | BTBD19        | 1,10 |
| long intergenic non-protein coding RNA 1270                                               | LINC01270     | 1,10 |
| unc-45 myosin chaperone B                                                                 | UNC45B        | 1,10 |
| kelch-like family member 10                                                               | KLHL10        | 1,10 |
| megalencephalic leukoencephalopathy with subcortical cysts 1                              | MLC1          | 1,10 |
| acid sensing ion channel family member 5                                                  | ASIC5         | 1,10 |
| adhesion G protein-coupled receptor A2                                                    | ADGRA2        | 1,10 |
| potassium channel, two pore domain subfamily K, member 1                                  | KCNK1         | 1,10 |
| alcohol dehydrogenase 1C (class I), gamma polypeptide                                     | ADH1C         | 1,10 |
| zinc finger protein 197                                                                   | ZNF197        | 1,10 |
| sushi, von Willebrand factor type A, EGF and pentraxin domain containing 1                | SVEP1         | 1,10 |
| solute carrier family 45, member 2                                                        | SLC45A2       | 1,10 |
| glycine-N-acyltransferase-like 3                                                          | GLYATL3       | 1,10 |
| RAB44, member RAS oncogene family                                                         | RAB44         | 1,10 |
| insulin-like growth factor 1 (somatomedin C)                                              | IGF1          | 1,10 |
| S-antigen; retina and pineal gland (arrestin)                                             | SAG           | 1,10 |
| chromosome 6 open reading frame 229                                                       | C6orf229      | 1,10 |
| family with sequence similarity 124 member B                                              | FAM124B       | 1,10 |
| transmembrane protein 220                                                                 | TMEM220       | 1,10 |
| organic solute carrier partner 1                                                          | OSCP1         | 1,10 |
| coiled-coil domain containing 187                                                         | CCDC187       | 1,10 |
| TBC1 domain family, member 10C                                                            | TBC1D10C      | 1,10 |
| GATA binding protein 1 (globin transcription factor 1)                                    | GATA1         | 1,10 |
| uridine-cytidine kinase 2; microRNA 3658                                                  | UCK2; MIR3658 | 1,10 |
| WNT1 inducible signaling pathway protein 1                                                | WISP1         | 1,10 |
| mucosal vascular addressin cell adhesion molecule 1                                       | MADCAM1       | 1,10 |
| ATPase, Ca++ transporting, plasma membrane 3                                              | ATP2B3        | 1,10 |
| SLX4 structure-specific endonuclease subunit                                              | SLX4          | 1,10 |

|                                                                                            |                   |      |
|--------------------------------------------------------------------------------------------|-------------------|------|
| adaptor-related protein complex 4, sigma 1 subunit                                         | AP4S1             | 1,10 |
| dpy-19-like 2 (C. elegans)                                                                 | DPY19L2           | 1,10 |
| ubiquitin conjugating enzyme E2Q family-like 1                                             | UBE2QL1           | 1,10 |
| UBA-like domain containing 1                                                               | UBALD1            | 1,10 |
| UTP18 small subunit (SSU) processome component                                             | UTP18             | 1,10 |
| Zhang2013 ALT_ACCEPTOR, ALT_DONOR, coding, INTERNAL, intronic best transcript NM_001164446 | C6orf132          | 1,10 |
| WD repeat and FYVE domain containing 3                                                     | WDFY3             | 1,10 |
| BARX homeobox 2                                                                            | BARX2             | 1,10 |
| fission, mitochondrial 1                                                                   | FIS1              | 1,10 |
| ZFP42 zinc finger protein                                                                  | ZFP42             | 1,10 |
| dishevelled associated activator of morphogenesis 2                                        | DAAM2             | 1,10 |
| breast carcinoma amplified sequence 4                                                      | BCAS4             | 1,10 |
| general transcription factor IIH subunit 5                                                 | GTF2H5            | 1,10 |
| hydroxysteroid (17-beta) dehydrogenase 10                                                  | HSD17B10          | 1,10 |
| zinc finger and SCAN domain containing 1                                                   | ZSCAN1            | 1,10 |
| lysine (K)-specific methyltransferase 2B                                                   | KMT2B             | 1,10 |
| prolyl 4-hydroxylase, transmembrane (endoplasmic reticulum)                                | P4HTM             | 1,10 |
| axonemal dynein light chain domain containing 1                                            | AXDND1            | 1,10 |
| SEH1-like nucleoporin                                                                      | SEH1L             | 1,10 |
| interactor of little elongation complex ELL subunit 2                                      | ICE2              | 1,10 |
| dual specificity phosphatase 27 (putative)                                                 | DUSP27            | 1,10 |
| peroxisomal biogenesis factor 26                                                           | PEX26             | 1,10 |
| G protein-coupled receptor 1                                                               | GPR1              | 1,10 |
| solute carrier organic anion transporter family, member 3A1                                | SLCO3A1           | 1,10 |
| N-deacetylase/N-sulfotransferase (heparan glucosaminy) 3                                   | NDST3             | 1,10 |
| ZFP82 zinc finger protein                                                                  | ZFP82             | 1,10 |
| olfactory receptor, family 4, subfamily K, member 17                                       | OR4K17            | 1,10 |
| WD repeat domain 43; small nucleolar RNA, C/D box 53                                       | WDR43;<br>SNORD53 | 1,10 |
| ATPase, class II, type 9A                                                                  | ATP9A             | 1,10 |
| chromosome 9 open reading frame 24                                                         | C9orf24           | 1,10 |
| RAB GTPase activating protein 1-like                                                       | RABGAP1L          | 1,10 |
| zinc finger protein 679                                                                    | ZNF679            | 1,10 |
| cyclin L1                                                                                  | CCNL1             | 1,10 |
| mitochondrial ribosomal protein L37                                                        | MRPL37            | 1,10 |
| family with sequence similarity 120A                                                       | FAM120A           | 1,10 |
| NOP16 nucleolar protein                                                                    | NOP16             | 1,10 |
| RIC3 acetylcholine receptor chaperone                                                      | RIC3              | 1,10 |
| CKLF-like MARVEL transmembrane domain containing 7                                         | CMTM7             | 1,10 |
| thymidine kinase 2, mitochondrial                                                          | TK2               | 1,10 |
| peptidase inhibitor 3, skin-derived                                                        | PI3               | 1,10 |

|                                                                     |             |      |
|---------------------------------------------------------------------|-------------|------|
| transmembrane protein 8C                                            | TMEM8C      | 1,10 |
| 1-aminocyclopropane-1-carboxylate synthase (inactive)-like          | ACCSL       | 1,10 |
| major histocompatibility complex, class II, DR beta 5               | HLA-DRB5    | 1,10 |
| tubulin, alpha 8                                                    | TUBA8       | 1,10 |
| Rho family GTPase 2                                                 | RND2        | 1,10 |
| glial fibrillary acidic protein                                     | GFAP        | 1,10 |
| chromosome 11 open reading frame 95                                 | C11orf95    | 1,10 |
| chromosome 17 open reading frame 107                                | C17orf107   | 1,10 |
| NADH dehydrogenase (ubiquinone) 1, subcomplex unknown, 1, 6kDa      | NDUFC1      | 1,10 |
| nucleus accumbens associated 1, BEN and BTB (POZ) domain containing | NACC1       | 1,10 |
| transcobalamin I (vitamin B12 binding protein, R binder family)     | TCN1        | 1,10 |
| patched domain containing 1                                         | PTCHD1      | 1,10 |
| olfactory receptor, family 4, subfamily M, member 2                 | OR4M2       | 1,10 |
| tumor necrosis factor (ligand) superfamily, member 18               | TNFSF18     | 1,10 |
| olfactory receptor, family 10, subfamily AG, member 1               | OR10AG1     | 1,10 |
| defensin, beta 4B                                                   | DEFB4B      | 1,10 |
| SATB homeobox 1                                                     | SATB1       | 1,10 |
| N-acetyltransferase domain containing 1                             | NATD1       | 1,10 |
| butyrophilin-like 8                                                 | BTNL8       | 1,10 |
| dipeptidyl-peptidase 9                                              | DPP9        | 1,10 |
| BRICK1, SCAR/WAVE actin-nucleating complex subunit                  | BRK1        | 1,10 |
| dynein regulatory complex subunit 1                                 | DRC1        | 1,10 |
| nuclear RNA export factor 2B; nuclear RNA export factor 2           | NXF2B; NXF2 | 1,10 |
| vesicle amine transport 1-like                                      | VAT1L       | 1,10 |
| BEN domain containing 6                                             | BEND6       | 1,10 |
| cytochrome P450, family 27, subfamily C, polypeptide 1              | CYP27C1     | 1,10 |
| nudE neurodevelopment protein 1-like 1                              | NDEL1       | 1,10 |
| EPH receptor A6                                                     | EPHA6       | 1,10 |
| neuroblastoma breakpoint family, member 8                           | NBPF8       | 1,10 |
| G protein-coupled bile acid receptor 1                              | GPBAR1      | 1,10 |
| glutamate receptor, ionotropic, AMPA 1                              | GRIA1       | 1,10 |
| ER membrane protein complex subunit 7                               | EMC7        | 1,10 |
| olfactory receptor, family 7, subfamily D, member 2                 | OR7D2       | 1,10 |
| keratin associated protein 9-2                                      | KRTAP9-2    | 1,10 |
| phosphodiesterase 5A, cGMP-specific                                 | PDE5A       | 1,10 |
| mediator of cell motility 1                                         | MEMO1       | 1,10 |
| lysozyme-like 1                                                     | LYZL1       | 1,10 |
| NK3 homeobox 2                                                      | NKX3-2      | 1,10 |

|                                                                                                                             |                      |      |
|-----------------------------------------------------------------------------------------------------------------------------|----------------------|------|
| Jeck2013 ALT_ACCEPTOR, ALT_DONOR, coding, INTERNAL, intronic best transcript NM_001014797; Transcript Identified by AceView | KCNMA1; swamu        | 1,10 |
| ret proto-oncogene                                                                                                          | RET                  | 1,10 |
| matrix extracellular phosphoglycoprotein                                                                                    | MEPE                 | 1,10 |
| cullin 2                                                                                                                    | CUL2                 | 1,10 |
| serine carboxypeptidase 1                                                                                                   | SCPEP1               | 1,10 |
| trafficking protein particle complex 4                                                                                      | TRAPPC4              | 1,10 |
| methyltransferase like 9                                                                                                    | METTL9               | 1,10 |
| ankyrin repeat domain 30B                                                                                                   | ANKRD30B             | 1,10 |
| GIPC PDZ domain containing family, member 3                                                                                 | GIPC3                | 1,10 |
| osteocrin                                                                                                                   | OSTN                 | 1,10 |
| N-acylsphingosine amidohydrolase (acid ceramidase) 1                                                                        | ASAH1                | 1,10 |
| complement component 3a receptor 1                                                                                          | C3AR1                | 1,10 |
| UDP glycosyltransferase 3 family, polypeptide A1                                                                            | UGT3A1               | 1,10 |
| G-rich RNA sequence binding factor 1                                                                                        | GRSF1                | 1,10 |
| shadow of prion protein homolog (zebrafish)                                                                                 | SPRN                 | 1,10 |
| tumor protein p63 regulated 1                                                                                               | TPRG1                | 1,10 |
| ADAM metallopeptidase with thrombospondin type 1 motif 13                                                                   | ADAMTS13             | 1,10 |
| chaperonin containing TCP1, subunit 7 (eta)                                                                                 | CCT7                 | 1,10 |
| ghrelin/obestatin prepropeptide                                                                                             | GHRL                 | 1,10 |
| Memczak2013 ANTISENSE, coding, INTERNAL, intronic best transcript NM_021931                                                 | DHX35                | 1,10 |
| F-box protein 48                                                                                                            | FBXO48               | 1,10 |
| PR domain containing 13                                                                                                     | PRDM13               | 1,10 |
| transglutaminase 4                                                                                                          | TGM4                 | 1,10 |
| cornifelin                                                                                                                  | CNFN                 | 1,10 |
| zinc finger protein 211                                                                                                     | ZNF211               | 1,10 |
| uncharacterized LOC285150; uncharacterized LOC285150 [Source:EntrezGene;Acc:285150]; novel transcript                       | FLJ33534; AC062028.1 | 1,10 |
| lipoxygenase homology domains 1                                                                                             | LOXHD1               | 1,10 |
| sorting nexin family member 27                                                                                              | SNX27                | 1,10 |
| tripartite motif containing 64C                                                                                             | TRIM64C              | 1,10 |
| taste receptor, type 1, member 2                                                                                            | TAS1R2               | 1,10 |
| family with sequence similarity 205, member A                                                                               | FAM205A              | 1,10 |
| HLA complex group 22                                                                                                        | HCG22                | 1,10 |
| MORN repeat containing 1                                                                                                    | MORN1                | 1,10 |
| LIM domain and actin binding 1                                                                                              | LIMA1                | 1,10 |
| tyrosine 3-monooxygenase/tryptophan 5-monooxygenase activation protein, epsilon pseudogene 7                                | YWHAEP7              | 1,10 |
| EPB41L4A antisense RNA 2 (head to head)                                                                                     | EPB41L4A-AS2         | 1,10 |
| basonuclin 2                                                                                                                | BNC2                 | 1,10 |
| cytotoxic and regulatory T-cell molecule                                                                                    | CRTAM                | 1,10 |

|                                                                                              |                             |      |
|----------------------------------------------------------------------------------------------|-----------------------------|------|
| ATP synthase mitochondrial F1 complex assembly factor 2                                      | ATPAF2                      | 1,10 |
| target of EGR1, member 1 (nuclear)                                                           | TOE1                        | 1,10 |
| aquaporin 1 (Colton blood group)                                                             | AQP1                        | 1,10 |
| polymerase (DNA directed), gamma 2, accessory subunit                                        | POLG2                       | 1,10 |
| carbonyl reductase 3                                                                         | CBR3                        | 1,10 |
| out at first homolog                                                                         | OAF                         | 1,10 |
| tropomodulin 4 (muscle)                                                                      | TMOD4                       | 1,10 |
| zinc finger and BTB domain containing 8B                                                     | ZBTB8B                      | 1,10 |
| testis expressed 13B                                                                         | TEX13B                      | 1,10 |
| Transcript Identified by AceView, Entrez Gene ID(s) 9246                                     | UBE2L6                      | 1,10 |
| tripartite motif containing 39                                                               | TRIM39                      | 1,10 |
| olfactory receptor, family 13, subfamily C, member 8                                         | OR13C8                      | 1,10 |
| paraoxonase 3                                                                                | PON3                        | 1,10 |
| immunoglobulin superfamily, DCC subclass, member 4                                           | IGDCC4                      | 1,10 |
| Memczak2013 ALT_ACCEPTOR, ALT_DONOR, coding, INTERNAL, intronic best transcript NM_014502    | PRPF19                      | 1,10 |
| Memczak2013 ALT_ACCEPTOR, ALT_DONOR, coding, INTERNAL, intronic best transcript NM_001170794 | BACH2                       | 1,10 |
| ubiquilin 3                                                                                  | UBQLN3                      | 1,10 |
| guanylate cyclase activator 1C                                                               | GUCA1C                      | 1,10 |
| retinoic acid induced 2                                                                      | RAI2                        | 1,10 |
| SHANK-associated RH domain interactor                                                        | SHARPIN                     | 1,10 |
| telomeric repeat binding factor 2, interacting protein                                       | TERF2IP                     | 1,10 |
| odorant binding protein 2B                                                                   | OBP2B                       | 1,10 |
| kinesin family member 20B                                                                    | KIF20B                      | 1,10 |
| Transcript Identified by AceView, Entrez Gene ID(s) 8850                                     | KAT2B                       | 1,10 |
| Rab interacting lysosomal protein                                                            | RILP                        | 1,10 |
| Transcript Identified by AceView, Entrez Gene ID(s) 5885                                     | RAD21                       | 1,10 |
| serpin peptidase inhibitor, clade B (ovalbumin), member 7                                    | SERPINB7                    | 1,10 |
| interleukin 2                                                                                | IL2                         | 1,10 |
| slingshot protein phosphatase 1                                                              | SSH1                        | 1,10 |
| inverted formin, FH2 and WH2 domain containing                                               | INF2                        | 1,10 |
| dihydrodiol dehydrogenase (dimeric)                                                          | DHDH                        | 1,10 |
| BLOC1S1-RDH5 readthrough; Uncharacterized protein [Source:UniProtKB/TrEMBL;Acc:F8VQNQ1]      | BLOC1S1-RDH5; RP11-644F5.10 | 1,10 |
| zinc finger protein 592                                                                      | ZNF592                      | 1,10 |
| PRAME family member 27                                                                       | PRAMEF27                    | 1,10 |
| zinc finger protein 414                                                                      | ZNF414                      | 1,10 |
| golgin A6 family-like 2                                                                      | GOLGA6L2                    | 1,10 |

|                                                                                                                                                                                  |                            |      |
|----------------------------------------------------------------------------------------------------------------------------------------------------------------------------------|----------------------------|------|
| zinc finger, C3HC-type containing 1                                                                                                                                              | ZC3HC1                     | 1,10 |
| ZFP2 zinc finger protein                                                                                                                                                         | ZFP2                       | 1,10 |
| protease, serine, 54                                                                                                                                                             | PRSS54                     | 1,10 |
| centrosomal protein 104kDa                                                                                                                                                       | CEP104                     | 1,10 |
| regulating synaptic membrane exocytosis 2                                                                                                                                        | RIMS2                      | 1,10 |
| T-cell leukemia homeobox 2                                                                                                                                                       | TLX2                       | 1,10 |
| zinc finger protein 501                                                                                                                                                          | ZNF501                     | 1,10 |
| CTD nuclear envelope phosphatase 1 regulatory subunit 1                                                                                                                          | CNEP1R1                    | 1,10 |
| potassium channel, inwardly rectifying subfamily J, member 11                                                                                                                    | KCNJ11                     | 1,10 |
| metastasis suppressor 1                                                                                                                                                          | MTSS1                      | 1,10 |
| tousled-like kinase 1                                                                                                                                                            | TLK1                       | 1,10 |
| Kruppel-like factor 13                                                                                                                                                           | KLF13                      | 1,10 |
| heat shock transcription factor 4; F-box and leucine-rich repeat protein 8                                                                                                       | HSF4; FBXL8                | 1,10 |
| solute carrier family 7, member 14                                                                                                                                               | SLC7A14                    | 1,10 |
| NUT family member 2G                                                                                                                                                             | NUTM2G                     | 1,10 |
| stimulated by retinoic acid 13                                                                                                                                                   | STRA13                     | 1,10 |
| tektin 1                                                                                                                                                                         | TEKT1                      | 1,10 |
| synaptotagmin V                                                                                                                                                                  | SYT5                       | 1,10 |
| long intergenic non-protein coding RNA 1276                                                                                                                                      | LINC01276                  | 1,10 |
| somatostatin receptor 2                                                                                                                                                          | SSTR2                      | 1,10 |
| Transcript Identified by AceView, Entrez Gene ID(s) 669                                                                                                                          | BPGM                       | 1,10 |
| sclerostin domain containing 1                                                                                                                                                   | SOSTDC1                    | 1,10 |
| checkpoint with forkhead and ring finger domains, E3 ubiquitin protein ligase                                                                                                    | CHFR                       | 1,10 |
| zona pellucida-like domain containing 1                                                                                                                                          | ZPLD1                      | 1,10 |
| RNA binding motif protein, Y-linked, family 1, member D;<br>RNA binding motif protein, Y-linked, family 1, member B;<br>RNA binding motif protein, Y-linked, family 1, member A1 | RBM1D;<br>RBM1B;<br>RBM1A1 | 1,10 |
| zinc finger protein 518A                                                                                                                                                         | ZNF518A                    | 1,10 |
| calcineurin-like phosphoesterase domain containing 1                                                                                                                             | CPPED1                     | 1,09 |
| RAS protein activator like 3                                                                                                                                                     | RASAL3                     | 1,09 |
| taste receptor, type 2, member 8                                                                                                                                                 | TAS2R8                     | 1,09 |
| C-type lectin domain family 4, member F                                                                                                                                          | CLEC4F                     | 1,09 |
| small integral membrane protein 10                                                                                                                                               | SMIM10                     | 1,09 |
| par-3 family cell polarity regulator                                                                                                                                             | PARD3                      | 1,09 |
| lysine (K)-specific demethylase 3A                                                                                                                                               | KDM3A                      | 1,09 |
| nephrosis 1, congenital, Finnish type (nephrin)                                                                                                                                  | NPHS1                      | 1,09 |
| olfactory receptor, family 5, subfamily AU, member 1                                                                                                                             | OR5AU1                     | 1,09 |
| proprotein convertase subtilisin/kexin type 7                                                                                                                                    | PCSK7                      | 1,09 |
| eyes shut homolog (Drosophila)                                                                                                                                                   | EYS                        | 1,09 |
| ferritin, heavy polypeptide-like 17                                                                                                                                              | FTHL17                     | 1,09 |

|                                                                             |                 |      |
|-----------------------------------------------------------------------------|-----------------|------|
| ADAM-like, decysin 1                                                        | ADAMDEC1        | 1,09 |
| stathmin-like 4                                                             | STMN4           | 1,09 |
| chromosome 2 open reading frame 16                                          | C2orf16         | 1,09 |
| cactin, spliceosome C complex subunit                                       | CACTIN          | 1,09 |
| orthopedia homeobox                                                         | OTP             | 1,09 |
| chromosome 20 open reading frame 195                                        | C20orf195       | 1,09 |
| exostosin-like glycosyltransferase 1                                        | EXTL1           | 1,09 |
| zinc finger CCCH-type containing 14                                         | ZC3H14          | 1,09 |
| ankyrin repeat, family A (RFXANK-like), 2                                   | ANKRA2          | 1,09 |
| aldo-keto reductase family 7-like (gene/pseudogene)                         | AKR7L           | 1,09 |
| centrosomal protein 44kDa                                                   | CEP44           | 1,09 |
| serine/threonine kinase 36                                                  | STK36           | 1,09 |
| PIF1 5-to-3 DNA helicase                                                    | PIF1            | 1,09 |
| WW domain containing E3 ubiquitin protein ligase 2                          | WWP2            | 1,09 |
| G protein-coupled receptor 148                                              | GPR148          | 1,09 |
| ubiquitin protein ligase E3 component n-recognin 7 (putative)               | UBR7            | 1,09 |
| apoptosis enhancing nuclease                                                | AEN             | 1,09 |
| PH domain and leucine rich repeat protein phosphatase 2                     | PHLPP2          | 1,09 |
| aquaporin 2 (collecting duct)                                               | AQP2            | 1,09 |
| 5-hydroxytryptamine (serotonin) receptor 2A, G protein-coupled              | HTR2A           | 1,09 |
| BCL2-like 14 (apoptosis facilitator)                                        | BCL2L14         | 1,09 |
| Memczak2013 ALT_DONOR, coding, INTERNAL, intronic best transcript NM_198268 | HIPK1           | 1,09 |
| SUV3-like helicase                                                          | SUPV3L1         | 1,09 |
| G protein-coupled receptor 108; microRNA 6791                               | GPR108; MIR6791 | 1,09 |
| ankyrin repeat domain 55                                                    | ANKRD55         | 1,09 |
| lectin, galactoside-binding, soluble, 4                                     | LGALS4          | 1,09 |
| BR serine/threonine kinase 1                                                | BRSK1           | 1,09 |
| Wilms tumor 1                                                               | WT1             | 1,09 |
| BAALC antisense RNA 2                                                       | BAALC-AS2       | 1,09 |
| protein phosphatase, Mg2+/Mn2+ dependent, 1G                                | PPM1G           | 1,09 |
| Transcript Identified by AceView, Entrez Gene ID(s) 2646                    | GCKR            | 1,09 |
| retinal degeneration 3-like                                                 | RD3L            | 1,09 |
| RAS p21 protein activator 3                                                 | RASA3           | 1,09 |
| aryl hydrocarbon receptor nuclear translocator                              | ARNT            | 1,09 |
| Transcript Identified by AceView, Entrez Gene ID(s) 57181                   | SLC39A10        | 1,09 |
| chemokine (C-C motif) ligand 18                                             | CCL18           | 1,09 |
| ligand of numb-protein X 1, E3 ubiquitin protein ligase                     | LNX1            | 1,09 |
| spermatogenesis associated 8                                                | SPATA8          | 1,09 |



|                                                                                                                                                                                                                                                                                                                                                             |                            |      |
|-------------------------------------------------------------------------------------------------------------------------------------------------------------------------------------------------------------------------------------------------------------------------------------------------------------------------------------------------------------|----------------------------|------|
| Transcript Identified by AceView, Entrez Gene ID(s) 26508                                                                                                                                                                                                                                                                                                   | HEYL                       | 1,09 |
| crystallin beta A1                                                                                                                                                                                                                                                                                                                                          | CRYBA1                     | 1,09 |
| zinc finger protein 579                                                                                                                                                                                                                                                                                                                                     | ZNF579                     | 1,09 |
| NADH dehydrogenase (ubiquinone) 1 alpha subcomplex, 10, 42kDa                                                                                                                                                                                                                                                                                               | NDUFA10                    | 1,09 |
| sulfotransferase family 1C member 3                                                                                                                                                                                                                                                                                                                         | SULT1C3                    | 1,09 |
| hydroxyacyl-CoA dehydrogenase/3-ketoacyl-CoA thiolase/enoyl-CoA hydratase (trifunctional protein), alpha subunit                                                                                                                                                                                                                                            | HADHA                      | 1,09 |
| fibroblast activation protein alpha                                                                                                                                                                                                                                                                                                                         | FAP                        | 1,09 |
| Homo sapiens neuropeptide Y receptor Y4 (NPY4R), transcript variant 2, mRNA.; neuropeptide Y receptor type 4-like; Homo sapiens pancreatic polypeptide receptor 1, mRNA (cDNA clone MGC:116895 IMAGE:40005502), complete cds.; Homo sapiens pancreatic polypeptide receptor 1, mRNA (cDNA clone MGC:116897 IMAGE:40005506), complete cds.; novel transcript | NPY4R; CH17-360D5.1; PPYR1 | 1,09 |
| anterior gradient 3, protein disulphide isomerase family member                                                                                                                                                                                                                                                                                             | AGR3                       | 1,09 |
| pre-mRNA processing factor 6                                                                                                                                                                                                                                                                                                                                | PRPF6                      | 1,09 |
| torsin family 1, member B (torsin B)                                                                                                                                                                                                                                                                                                                        | TOR1B                      | 1,09 |
| mitochondrial genome maintenance exonuclease 1                                                                                                                                                                                                                                                                                                              | MGME1                      | 1,09 |
| olfactory receptor, family 2, subfamily AT, member 4                                                                                                                                                                                                                                                                                                        | OR2AT4                     | 1,09 |
| syncollin                                                                                                                                                                                                                                                                                                                                                   | SYCN                       | 1,09 |
| nucleoporin 37kDa                                                                                                                                                                                                                                                                                                                                           | NUP37                      | 1,09 |
| interleukin 1 receptor associated kinase 2                                                                                                                                                                                                                                                                                                                  | IRAK2                      | 1,09 |
| nebulin                                                                                                                                                                                                                                                                                                                                                     | NEBL                       | 1,09 |
| complement component 1, q subcomponent-like 4                                                                                                                                                                                                                                                                                                               | C1QL4                      | 1,09 |
| solute carrier family 34 (type II sodium/phosphate cotransporter), member 3                                                                                                                                                                                                                                                                                 | SLC34A3                    | 1,09 |
| ubiquitin specific peptidase 3                                                                                                                                                                                                                                                                                                                              | USP3                       | 1,09 |
| heat shock transcription factor family member 5                                                                                                                                                                                                                                                                                                             | HSF5                       | 1,09 |
| ral guanine nucleotide dissociation stimulator-like 4                                                                                                                                                                                                                                                                                                       | RGL4                       | 1,09 |
| phosphatidylinositol glycan anchor biosynthesis class G                                                                                                                                                                                                                                                                                                     | PIGG                       | 1,09 |
| RNA binding motif protein 46                                                                                                                                                                                                                                                                                                                                | RBM46                      | 1,09 |
| solute carrier family 45, member 1                                                                                                                                                                                                                                                                                                                          | SLC45A1                    | 1,09 |
| dual specificity phosphatase and pro isomerase domain containing 1                                                                                                                                                                                                                                                                                          | DUPD1                      | 1,09 |
| ATP6V1G2-DDX39B readthrough (NMD candidate)                                                                                                                                                                                                                                                                                                                 | ATP6V1G2-DDX39B            | 1,09 |
| TP53 target 3C                                                                                                                                                                                                                                                                                                                                              | TP53TG3C                   | 1,09 |
| small integral membrane protein 18                                                                                                                                                                                                                                                                                                                          | SMIM18                     | 1,09 |

|                                                                                              |                           |      |
|----------------------------------------------------------------------------------------------|---------------------------|------|
| calcium channel, voltage-dependent, L type, alpha 1C subunit                                 | CACNA1C                   | 1,09 |
| PX domain containing 1                                                                       | PXDC1                     | 1,09 |
| zinc finger, CCHC domain containing 12                                                       | ZCCHC12                   | 1,09 |
| 2-deoxynucleoside 5-phosphate N-hydrolase 1                                                  | DNPH1                     | 1,09 |
| solute carrier family 25 (S-adenosylmethionine carrier), member 26                           | SLC25A26                  | 1,09 |
| Memczak2013 ALT_ACCEPTOR, ALT_DONOR, coding, INTERNAL, intronic best transcript NM_001170794 | BACH2                     | 1,09 |
| solute carrier family 8 (sodium/calcium exchanger), member 3                                 | SLC8A3                    | 1,09 |
| elastin                                                                                      | ELN                       | 1,09 |
| G antigen 2B; G antigen 2A; G antigen 2C                                                     | GAGE2B;<br>GAGE2A; GAGE2C | 1,09 |
| peptidyl arginine deiminase, type III                                                        | PADI3                     | 1,09 |
| ATP binding cassette subfamily A member 6                                                    | ABCA6                     | 1,09 |
| netrin G2                                                                                    | NTNG2                     | 1,09 |
| POTE ankyrin domain family, member D                                                         | POTED                     | 1,09 |
| chromosome 3 open reading frame 84                                                           | C3orf84                   | 1,09 |
| aldo-keto reductase family 7, member A2                                                      | AKR7A2                    | 1,09 |
| RAB, member of RAS oncogene family-like 2A                                                   | RABL2A                    | 1,09 |
| intercellular adhesion molecule 5                                                            | ICAM5                     | 1,09 |
| toll-like receptor 9                                                                         | TLR9                      | 1,09 |
| zinc finger and SCAN domain containing 20                                                    | ZSCAN20                   | 1,09 |
| complement factor H-related 3                                                                | CFHR3                     | 1,09 |
| oxidized low density lipoprotein (lectin-like) receptor 1                                    | OLR1                      | 1,09 |
| transmembrane protease, serine 9                                                             | TMPRSS9                   | 1,09 |
| free fatty acid receptor 4                                                                   | FFAR4                     | 1,09 |
| signal peptide peptidase like 3                                                              | SPPL3                     | 1,09 |
| eukaryotic translation initiation factor 2 alpha kinase 4                                    | EIF2AK4                   | 1,09 |
| ATP binding cassette subfamily A member 9                                                    | ABCA9                     | 1,09 |
| regulator of microtubule dynamics 3                                                          | RMDN3                     | 1,09 |
| polyhomeotic homolog 1 (Drosophila)                                                          | PHC1                      | 1,09 |
| olfactory receptor, family 5, subfamily J, member 2                                          | OR5J2                     | 1,09 |
| netrin 4                                                                                     | NTN4                      | 1,09 |
| family with sequence similarity 26, member D                                                 | FAM26D                    | 1,09 |
| ets variant 7                                                                                | ETV7                      | 1,09 |
| homeodomain interacting protein kinase 4                                                     | HIPK4                     | 1,09 |
| ESX homeobox 1                                                                               | ESX1                      | 1,09 |
| HCK proto-oncogene, Src family tyrosine kinase                                               | HCK                       | 1,09 |
| CD300 molecule-like family member f                                                          | CD300LF                   | 1,09 |
| small integral membrane protein 15                                                           | SMIM15                    | 1,09 |
| TraB domain containing 2A                                                                    | TRABD2A                   | 1,09 |
| glucokinase (hexokinase 4)                                                                   | GCK                       | 1,09 |

|                                                                                        |                                  |      |
|----------------------------------------------------------------------------------------|----------------------------------|------|
| Jeck2013 ALT_ACCEPTOR, ALT_DONOR, coding, INTERNAL, intronic best transcript NM_017660 | GATAD2A                          | 1,09 |
| caveolin 3                                                                             | CAV3                             | 1,09 |
| microfibrillar associated protein 3 like                                               | MFAP3L                           | 1,09 |
| olfactory receptor, family 52, subfamily M, member 1                                   | OR52M1                           | 1,09 |
| protein phosphatase, Mg2+/Mn2+ dependent, 1A                                           | PPM1A                            | 1,09 |
| family with sequence similarity 170, member A                                          | FAM170A                          | 1,09 |
| motilin                                                                                | MLN                              | 1,09 |
| keratinocyte associated protein 3                                                      | KRTCAP3                          | 1,09 |
| family with sequence similarity 71, member C                                           | FAM71C                           | 1,09 |
| Transcript Identified by AceView, Entrez Gene ID(s) 79658                              | ARHGAP10                         | 1,09 |
| adaptor-related protein complex 4, beta 1 subunit                                      | AP4B1                            | 1,09 |
| leucine rich repeat containing 41                                                      | LRRC41                           | 1,09 |
| kinesin family member 19                                                               | KIF19                            | 1,09 |
| origin recognition complex subunit 4                                                   | ORC4                             | 1,09 |
| dihydropyrimidinase-like 4                                                             | DPYSL4                           | 1,09 |
| H2B histone family, member W, testis-specific                                          | H2BFWT                           | 1,09 |
| extended synaptotagmin-like protein 2                                                  | ESYT2                            | 1,09 |
| S100 calcium binding protein A8                                                        | S100A8                           | 1,09 |
| membrane-spanning 4-domains, subfamily A, member 1                                     | MS4A1                            | 1,09 |
| testis-specific serine kinase 2                                                        | TSSK2                            | 1,09 |
| tRNA methyltransferase 10A                                                             | TRMT10A                          | 1,09 |
| cytochrome P450, family 2, subfamily F, polypeptide 1                                  | CYP2F1                           | 1,09 |
| nephronophthisis 1 (juvenile)                                                          | NPHP1                            | 1,09 |
| NADH dehydrogenase, subunit 1 (complex I)                                              | ND1                              | 1,09 |
| interleukin 5                                                                          | IL5                              | 1,09 |
| atonal bHLH transcription factor 8                                                     | ATOH8                            | 1,09 |
| chromodomain helicase DNA binding protein 8                                            | CHD8                             | 1,09 |
| beta-1,3-N-acetylgalactosaminyltransferase 1 (globoside blood group)                   | B3GALNT1                         | 1,09 |
| carboxypeptidase, vitellogenic-like                                                    | CPVL                             | 1,09 |
| keratin 16, type I                                                                     | KRT16                            | 1,09 |
| gamma-aminobutyric acid (GABA) B receptor, 2                                           | GABBR2                           | 1,09 |
| uncharacterized LOC149373; Transcript Identified by AceView; novel transcript          | LOC149373; RP5-1097F14.3; kosimo | 1,09 |
| family with sequence similarity 160, member B1                                         | FAM160B1                         | 1,09 |
| leucine rich repeat transmembrane neuronal 1                                           | LRRTM1                           | 1,09 |
| chromosome 19 open reading frame 47                                                    | C19orf47                         | 1,09 |
| signal-regulatory protein beta 2                                                       | SIRPB2                           | 1,09 |
| PQ loop repeat containing 3                                                            | PQLC3                            | 1,09 |
| ubiquitously expressed prefoldin like chaperone                                        | UXT                              | 1,09 |
| calcium channel flower domain containing 1                                             | CACFD1                           | 1,09 |

|                                                                             |              |      |
|-----------------------------------------------------------------------------|--------------|------|
| olfactory receptor, family 10, subfamily S, member 1                        | OR10S1       | 1,09 |
| transcription elongation factor A (SII)-like 5                              | TCEAL5       | 1,09 |
| THUMP domain containing 3                                                   | THUMPD3      | 1,09 |
| thiamin pyrophosphokinase 1                                                 | TPK1         | 1,09 |
| amylase, alpha 1A (salivary); amylase, alpha 1C (salivary)                  | AMY1A; AMY1C | 1,09 |
| chromosome 2 open reading frame 81                                          | C2orf81      | 1,09 |
| protein tyrosine phosphatase type IVA, member 2                             | PTP4A2       | 1,09 |
| DDB1 and CUL4 associated factor 8-like 2                                    | DCAF8L2      | 1,09 |
| Memczak2013 ANTISENSE, coding, INTERNAL, UTR3 best transcript NM_130847     | AMOTL1       | 1,09 |
| leptin receptor overlapping transcript-like 1                               | LEPROTL1     | 1,09 |
| transcription factor 7-like 2 (T-cell specific, HMG-box)                    | TCF7L2       | 1,09 |
| ADNP homeobox 2                                                             | ADNP2        | 1,09 |
| protein tyrosine phosphatase, receptor type, T                              | PTPRT        | 1,09 |
| RAD52 motif containing 1                                                    | RDM1         | 1,09 |
| mediator complex subunit 1                                                  | MED1         | 1,09 |
| Memczak2013 ANTISENSE, coding, INTERNAL, UTR3 best transcript NM_015354     | NUP188       | 1,09 |
| UDP-GlcNAc:betaGal beta-1,3-N-acetylglucosaminyltransferase 9               | B3GNT9       | 1,09 |
| WNT inhibitory factor 1                                                     | WIF1         | 1,09 |
| coiled-coil domain containing 169                                           | CCDC169      | 1,09 |
| Salzman2013 ANTISENSE, coding, INTERNAL, intronic best transcript NM_032968 | PCDH11X      | 1,09 |
| mitochondrial rRNA methyltransferase 1                                      | MRM1         | 1,09 |
| bestrophin 3                                                                | BEST3        | 1,09 |
| coilin                                                                      | COIL         | 1,09 |
| zinc finger protein 727                                                     | ZNF727       | 1,09 |
| cerebral dopamine neurotrophic factor                                       | CDNF         | 1,09 |
| cystatin 9 (testatin)                                                       | CST9         | 1,09 |
| interferon, alpha 21                                                        | IFNA21       | 1,09 |
| Transcript Identified by AceView, Entrez Gene ID(s) 94031                   | HTRA3        | 1,09 |
| regulation of nuclear pre-mRNA domain containing 1B                         | RPRD1B       | 1,09 |
| membrane associated ring finger 8                                           | MARCH8       | 1,09 |
| sarcoglycan gamma                                                           | SGCG         | 1,09 |
| EYA transcriptional coactivator and phosphatase 2                           | EYA2         | 1,09 |
| transglutaminase 7                                                          | TGM7         | 1,09 |
| spermatogenesis associated 41 (non-protein coding)                          | SPATA41      | 1,09 |
| olfactory receptor, family 5, subfamily AS, member 1                        | OR5AS1       | 1,09 |
| zinc finger protein 273                                                     | ZNF273       | 1,09 |
| apolipoprotein C-IV                                                         | APOC4        | 1,09 |
| olfactory receptor, family 4, subfamily K, member 13                        | OR4K13       | 1,09 |
| mutS homolog 6                                                              | MSH6         | 1,09 |

|                                                                                                                                                                                                                                                                                                                                                      |                             |      |
|------------------------------------------------------------------------------------------------------------------------------------------------------------------------------------------------------------------------------------------------------------------------------------------------------------------------------------------------------|-----------------------------|------|
| transmembrane protein 163                                                                                                                                                                                                                                                                                                                            | TMEM163                     | 1,09 |
| sarcolemma associated protein                                                                                                                                                                                                                                                                                                                        | SLMAP                       | 1,09 |
| SPANX family, member N1                                                                                                                                                                                                                                                                                                                              | SPANXN1                     | 1,09 |
| N(alpha)-acetyltransferase 15, NatA auxiliary subunit                                                                                                                                                                                                                                                                                                | NAA15                       | 1,09 |
| ralA binding protein 1                                                                                                                                                                                                                                                                                                                               | RALBP1                      | 1,09 |
| inter-alpha-trypsin inhibitor heavy chain family, member 6                                                                                                                                                                                                                                                                                           | ITIH6                       | 1,09 |
| ZFP28 zinc finger protein                                                                                                                                                                                                                                                                                                                            | ZFP28                       | 1,09 |
| THO complex 3 pseudogene; Homo sapiens THO complex 3, mRNA (cDNA clone MGC:5469 IMAGE:3451612), complete cds.; Homo sapiens THO complex 3, mRNA (cDNA clone MGC:87233 IMAGE:5262880), complete cds.; Salzman2013 ANNOTATED, INTERNAL, ncRNA, OVERLAPTX, OVEXON best transcript NR_003615; Transcript Identified by AceView, Entrez Gene ID(s) 728554 | LOC728554; THOC3            | 1,09 |
| cytochrome c, somatic                                                                                                                                                                                                                                                                                                                                | CYCS                        | 1,09 |
| wingless-type MMTV integration site family, member 9A                                                                                                                                                                                                                                                                                                | WNT9A                       | 1,09 |
| mitochondrial ribosomal protein L46                                                                                                                                                                                                                                                                                                                  | MRPL46                      | 1,09 |
| BMS1 ribosome biogenesis factor pseudogene 20; immunoglobulin lambda variable 1-51; immunoglobulin lambda variable 5-52                                                                                                                                                                                                                              | BMS1P20; IGLV1-51; IGLV5-52 | 1,09 |
| double homeobox 4 like 14; double homeobox 4 like 15                                                                                                                                                                                                                                                                                                 | DUX4L14; DUX4L15            | 1,09 |
| TBC1 domain family, member 22B                                                                                                                                                                                                                                                                                                                       | TBC1D22B                    | 1,09 |
| single-strand-selective monofunctional uracil-DNA glycosylase 1                                                                                                                                                                                                                                                                                      | SMUG1                       | 1,09 |
| NSA2 ribosome biogenesis homolog                                                                                                                                                                                                                                                                                                                     | NSA2                        | 1,09 |
| mediator complex subunit 14                                                                                                                                                                                                                                                                                                                          | MED14                       | 1,09 |
| interferon (alpha, beta and omega) receptor 2                                                                                                                                                                                                                                                                                                        | IFNAR2                      | 1,09 |
| tubulin, alpha 1b                                                                                                                                                                                                                                                                                                                                    | TUBA1B                      | 1,09 |
| Fc fragment of IgG, high affinity Ia, receptor (CD64)                                                                                                                                                                                                                                                                                                | FCGR1A                      | 1,09 |
| MT-RNR2-like 1                                                                                                                                                                                                                                                                                                                                       | MTRNR2L1                    | 1,09 |
| calpain, small subunit 2                                                                                                                                                                                                                                                                                                                             | CAPNS2                      | 1,09 |
| zinc finger protein 197                                                                                                                                                                                                                                                                                                                              | ZNF197                      | 1,09 |
| adaptor-related protein complex 1, mu 2 subunit                                                                                                                                                                                                                                                                                                      | AP1M2                       | 1,09 |
| hemoglobin, mu                                                                                                                                                                                                                                                                                                                                       | HBM                         | 1,09 |
| Transcript Identified by AceView, Entrez Gene ID(s) 9402; putative novel transcript                                                                                                                                                                                                                                                                  | RP3-370M22.8; GRAP2         | 1,09 |
| zinc finger protein 418                                                                                                                                                                                                                                                                                                                              | ZNF418                      | 1,09 |
| THAP7 antisense RNA 1                                                                                                                                                                                                                                                                                                                                | THAP7-AS1                   | 1,09 |
| ribosomal protein L36a                                                                                                                                                                                                                                                                                                                               | RPL36A                      | 1,09 |
| transmembrane protein 161A                                                                                                                                                                                                                                                                                                                           | TMEM161A                    | 1,09 |
| oxysterol binding protein-like 1A                                                                                                                                                                                                                                                                                                                    | OSBPL1A                     | 1,09 |

|                                                                                                                                                    |                            |      |
|----------------------------------------------------------------------------------------------------------------------------------------------------|----------------------------|------|
| leiomodrin 1 (smooth muscle)                                                                                                                       | LMOD1                      | 1,09 |
| testis specific protein, Y-linked 3; testis specific protein, Y-linked 4; testis specific protein, Y-linked 8; testis specific protein, Y-linked 1 | TSPY3; TSPY4; TSPY8; TSPY1 | 1,09 |
| long intergenic non-protein coding RNA 612                                                                                                         | LINC00612                  | 1,08 |
| TIA1 cytotoxic granule-associated RNA binding protein-like 1                                                                                       | TIAL1                      | 1,08 |
| olfactory receptor, family 2, subfamily T, member 11 (gene/pseudogene)                                                                             | OR2T11                     | 1,08 |
| microRNA 659; ankyrin repeat domain 54                                                                                                             | MIR659; ANKRD54            | 1,08 |
| arginine and glutamate rich 1                                                                                                                      | ARGLU1                     | 1,08 |
| IZUMO family member 4                                                                                                                              | IZUMO4                     | 1,08 |
| general transcription factor IIB                                                                                                                   | GTF2B                      | 1,08 |
| mitogen-activated protein kinase kinase kinase 19                                                                                                  | MAP3K19                    | 1,08 |
| olfactory receptor, family 13, subfamily H, member 1                                                                                               | OR13H1                     | 1,08 |
| NLR family, pyrin domain containing 2                                                                                                              | NLRP2                      | 1,08 |
| phospholipase C, zeta 1                                                                                                                            | PLCZ1                      | 1,08 |
| purinergic receptor P2Y, G-protein coupled, 13                                                                                                     | P2RY13                     | 1,08 |
| elastin microfibril interfacer 3                                                                                                                   | EMILIN3                    | 1,08 |
| class II, major histocompatibility complex, transactivator                                                                                         | CIITA                      | 1,08 |
| Ras association (RalGDS/AF-6) domain family (N-terminal) member 9                                                                                  | RASSF9                     | 1,08 |
| relaxin 1                                                                                                                                          | RLN1                       | 1,08 |
| 5-nucleotidase, ecto (CD73)                                                                                                                        | NT5E                       | 1,08 |
| matrilin 1, cartilage matrix protein                                                                                                               | MATN1                      | 1,08 |
| olfactory receptor, family 6, subfamily C, member 6                                                                                                | OR6C6                      | 1,08 |
| amphiphysin                                                                                                                                        | AMPH                       | 1,08 |
| glycerol-3-phosphate dehydrogenase 1                                                                                                               | GPD1                       | 1,08 |
| transforming growth factor beta 3                                                                                                                  | TGFB3                      | 1,08 |
| Sin3A associated protein 18kDa                                                                                                                     | SAP18                      | 1,08 |
| aurora kinase A interacting protein 1                                                                                                              | AURKAIP1                   | 1,08 |
| lysophospholipase I                                                                                                                                | LYPLA1                     | 1,08 |
| forkhead box B1                                                                                                                                    | FOXB1                      | 1,08 |
| cilia and flagella associated protein 70                                                                                                           | CFAP70                     | 1,08 |
| solute carrier family 5 (sodium/monocarboxylate cotransporter), member 12                                                                          | SLC5A12                    | 1,08 |
| DEAD (Asp-Glu-Ala-Asp) box helicase 42                                                                                                             | DDX42                      | 1,08 |
| exportin 5                                                                                                                                         | XPO5                       | 1,08 |
| pentatricopeptide repeat domain 2                                                                                                                  | PTCD2                      | 1,08 |
| pleckstrin and Sec7 domain containing 2                                                                                                            | PSD2                       | 1,08 |
| reticulon 4 receptor-like 1                                                                                                                        | RTN4RL1                    | 1,08 |
| Memczak2013 ALT_ACCEPTOR, ALT_DONOR, coding, INTERNAL, intronic best transcript NM_031453                                                          | FAM107B                    | 1,08 |

|                                                                                        |                                |      |
|----------------------------------------------------------------------------------------|--------------------------------|------|
| protease, serine, 16 (thymus)                                                          | PRSS16                         | 1,08 |
| ATP binding cassette subfamily B member 8                                              | ABCB8                          | 1,08 |
| insulinoma-associated 1                                                                | INSM1                          | 1,08 |
| leucine rich repeat containing 32                                                      | LRRC32                         | 1,08 |
| family with sequence similarity 218, member A                                          | FAM218A                        | 1,08 |
| putative novel transcript; Transcript Identified by<br>AceView, Entrez Gene ID(s) 6048 | XXbac-<br>BPG154L12.4;<br>RNF5 | 1,08 |
| ornithine decarboxylase antizyme 1                                                     | OAZ1                           | 1,08 |
| SPT16 homolog, facilitates chromatin remodeling subunit                                | SUPT16H                        | 1,08 |
| receptor (G protein-coupled) activity modifying protein 3                              | RAMP3                          | 1,08 |
| integral membrane protein 2C                                                           | ITM2C                          | 1,08 |
| T-box 18                                                                               | TBX18                          | 1,08 |
| EGF-like-domain, multiple 7                                                            | EGFL7                          | 1,08 |
| ring finger protein 151                                                                | RNF151                         | 1,08 |
| NCK-associated protein 1-like                                                          | NCKAP1L                        | 1,08 |
| NADH dehydrogenase (ubiquinone) complex I, assembly<br>factor 6                        | NDUFAF6                        | 1,08 |
| chromosome 11 open reading frame 16                                                    | C11orf16                       | 1,08 |
| WD repeat domain 64                                                                    | WDR64                          | 1,08 |
| chromosome 1 open reading frame 68                                                     | C1orf68                        | 1,08 |
| phosphodiesterase 6A, cGMP-specific, rod, alpha                                        | PDE6A                          | 1,08 |
| cell adhesion molecule 4                                                               | CADM4                          | 1,08 |
| collagen, type XIV, alpha 1                                                            | COL14A1                        | 1,08 |
| peptidyl arginine deiminase, type I                                                    | PADI1                          | 1,08 |
| RALY RNA binding protein-like                                                          | RALYL                          | 1,08 |
| ankyrin and armadillo repeat containing                                                | ANKAR                          | 1,08 |
| olfactory receptor, family 10, subfamily G, member 8                                   | OR10G8                         | 1,08 |
| nudix hydrolase 5                                                                      | NUDT5                          | 1,08 |
| growth regulation by estrogen in breast cancer-like                                    | GREB1L                         | 1,08 |
| iodotyrosine deiodinase                                                                | IYD                            | 1,08 |
| thioredoxin domain containing 2 (spermatzoa)                                           | TXNDC2                         | 1,08 |
| Yip1 interacting factor homolog B (S. cerevisiae)                                      | YIF1B                          | 1,08 |
| SH3-domain GRB2-like endophilin B1                                                     | SH3GLB1                        | 1,08 |
| ATPase, class V, type 10B                                                              | ATP10B                         | 1,08 |
| Transcript Identified by AceView, Entrez Gene ID(s) 7182                               | NR2C2                          | 1,08 |
| PRAME family member 5                                                                  | PRAMEF5                        | 1,08 |
| zinc finger protein 44                                                                 | ZNF44                          | 1,08 |
| interferon, alpha 4                                                                    | IFNA4                          | 1,08 |
| zinc finger protein 132                                                                | ZNF132                         | 1,08 |
| ADP-ribosylation factor interacting protein 1                                          | ARFIP1                         | 1,08 |
| fibroblast growth factor 5                                                             | FGF5                           | 1,08 |

|                                                                                              |           |      |
|----------------------------------------------------------------------------------------------|-----------|------|
| ATR serine/threonine kinase                                                                  | ATR       | 1,08 |
| kinesin family member 6                                                                      | KIF6      | 1,08 |
| late cornified envelope 3A                                                                   | LCE3A     | 1,08 |
| chemokine (C-C motif) ligand 21                                                              | CCL21     | 1,08 |
| spla/ryanodine receptor domain and SOCS box containing 2                                     | SPSB2     | 1,08 |
| nuclear factor of kappa light polypeptide gene enhancer in B-cells inhibitor, delta          | NFKBID    | 1,08 |
| olfactory receptor, family 2, subfamily Y, member 1                                          | OR2Y1     | 1,08 |
| ras-related C3 botulinum toxin substrate 3 (rho family, small GTP binding protein Rac3)      | RAC3      | 1,08 |
| ring finger protein 223                                                                      | RNF223    | 1,08 |
| sirtuin 2                                                                                    | SIRT2     | 1,08 |
| integrator complex subunit 5                                                                 | INTS5     | 1,08 |
| proteasome 26S subunit, ATPase 4 [Source:HGNC Symbol;Acc:HGNC:9551]                          | PSMC4     | 1,08 |
| chromosome 7 open reading frame 71                                                           | C7orf71   | 1,08 |
| early growth response 4                                                                      | EGR4      | 1,08 |
| ADAMTS like 1                                                                                | ADAMTSL1  | 1,08 |
| potassium channel, voltage gated KQT-like subfamily Q, member 1                              | KCNQ1     | 1,08 |
| NADH dehydrogenase, subunit 4L (complex I); NADH dehydrogenase, subunit 4 (complex I)        | ND4L; ND4 | 1,08 |
| leiomodin 3 (fetal)                                                                          | LMOD3     | 1,08 |
| Transcript Identified by AceView, Entrez Gene ID(s) 1837                                     | DTNA      | 1,08 |
| RAB6B, member RAS oncogene family                                                            | RAB6B     | 1,08 |
| solute carrier family 25, member 44                                                          | SLC25A44  | 1,08 |
| achaete-scute family bHLH transcription factor 2                                             | ASCL2     | 1,08 |
| TRHDE antisense RNA 1                                                                        | TRHDE-AS1 | 1,08 |
| Memczak2013 ALT_ACCEPTOR, ALT_DONOR, coding, INTERNAL, intronic best transcript NM_001025108 | AFF3      | 1,08 |
| Transcript Identified by AceView, Entrez Gene ID(s) 50515                                    | CHST11    | 1,08 |
| ankyrin repeat domain 22                                                                     | ANKRD22   | 1,08 |
| calmodulin 2 (phosphorylase kinase, delta)                                                   | CALM2     | 1,08 |
| tight junction associated protein 1 (peripheral)                                             | TJAP1     | 1,08 |
| C1q and tumor necrosis factor related protein 8                                              | C1QTNF8   | 1,08 |
| teneurin transmembrane protein 4                                                             | TENM4     | 1,08 |
| chromosome 3 open reading frame 62                                                           | C3orf62   | 1,08 |
| succinate dehydrogenase complex, subunit C, integral membrane protein, 15kDa                 | SDHC      | 1,08 |
| chromosome 5 open reading frame 67                                                           | C5orf67   | 1,08 |
| olfactory receptor, family 56, subfamily B, member 4                                         | OR56B4    | 1,08 |
| ubiquilin 4                                                                                  | UBQLN4    | 1,08 |



|                                                                                                                                       |                |      |
|---------------------------------------------------------------------------------------------------------------------------------------|----------------|------|
| laminin, alpha 1                                                                                                                      | LAMA1          | 1,08 |
| osteoclast stimulating factor 1                                                                                                       | OSTF1          | 1,08 |
| CWC15 spliceosome-associated protein                                                                                                  | CWC15          | 1,08 |
| heart and neural crest derivatives expressed 1                                                                                        | HAND1          | 1,08 |
| BCL2-like 14 (apoptosis facilitator)                                                                                                  | BCL2L14        | 1,08 |
| armadillo repeat containing, X-linked 5                                                                                               | ARMCX5         | 1,08 |
| transmembrane protein 42; microRNA 564                                                                                                | TMEM42; MIR564 | 1,08 |
| phospholipid phosphatase related 4                                                                                                    | PLPPR4         | 1,08 |
| chromosome transmission fidelity factor 8                                                                                             | CHTF8          | 1,08 |
| chromosome 1 open reading frame 226                                                                                                   | C1orf226       | 1,08 |
| family with sequence similarity 46, member C                                                                                          | FAM46C         | 1,08 |
| family with sequence similarity 159, member B                                                                                         | FAM159B        | 1,08 |
| Transcript Identified by AceView, Entrez Gene ID(s) 50515                                                                             | CHST11         | 1,08 |
| casein kappa                                                                                                                          | CSN3           | 1,08 |
| spermatogenesis associated 6                                                                                                          | SPATA6         | 1,08 |
| interleukin 1 alpha                                                                                                                   | IL1A           | 1,08 |
| cyclic nucleotide binding domain containing 2                                                                                         | CNBD2          | 1,08 |
| c-Maf inducing protein                                                                                                                | CMIP           | 1,08 |
| carnosine synthase 1                                                                                                                  | CARNS1         | 1,08 |
| potassium channel, inwardly rectifying subfamily J, member 2                                                                          | KCNJ2          | 1,08 |
| protein phosphatase, Mg <sup>2+</sup> /Mn <sup>2+</sup> dependent, 1B                                                                 | PPM1B          | 1,08 |
| transmembrane protein 108                                                                                                             | TMEM108        | 1,08 |
| centromere protein L                                                                                                                  | CENPL          | 1,08 |
| Transcript Identified by AceView, Entrez Gene ID(s) 23355                                                                             | VPS8           | 1,08 |
| chromosome 1 open reading frame 21                                                                                                    | C1orf21        | 1,08 |
| TGFB-induced factor homeobox 2-like, X-linked                                                                                         | TGIF2LX        | 1,08 |
| p21 protein (Cdc42/Rac)-activated kinase 6; BUB1 mitotic checkpoint serine/threonine kinase B                                         | PAK6; BUB1B    | 1,08 |
| chaperonin containing TCP1, subunit 3 (gamma)                                                                                         | CCT3           | 1,08 |
| neuralized E3 ubiquitin protein ligase 1                                                                                              | NEURL1         | 1,08 |
| olfactory receptor, family 5, subfamily G, member 5 pseudogene; olfactory receptor, family 5, subfamily G, member 3 (gene/pseudogene) | OR5G5P; OR5G3  | 1,08 |
| trefoil factor 3                                                                                                                      | TFF3           | 1,08 |
| calpain 13                                                                                                                            | CAPN13         | 1,08 |
| coiled-coil domain containing 89                                                                                                      | CCDC89         | 1,08 |
| ADAM metallopeptidase with thrombospondin type 1 motif 14                                                                             | ADAMTS14       | 1,08 |
| gon-4-like (C. elegans)                                                                                                               | GON4L          | 1,08 |
| family with sequence similarity 71, member F2                                                                                         | FAM71F2        | 1,08 |
| PRAME family member 11                                                                                                                | PRAMEF11       | 1,08 |

|                                                                                        |              |      |
|----------------------------------------------------------------------------------------|--------------|------|
| germinal center-associated, signaling and motility                                     | GCSAM        | 1,08 |
| centrin 1                                                                              | CETN1        | 1,08 |
| WAS protein homolog associated with actin, golgi membranes and microtubules            | WHAMM        | 1,08 |
| EF-hand calcium binding domain 8                                                       | EFCAB8       | 1,08 |
| cullin 9                                                                               | CUL9         | 1,08 |
| GRIP and coiled-coil domain containing 1                                               | GCC1         | 1,08 |
| somatomedin B and thrombospondin type 1 domain containing                              | SBSPON       | 1,08 |
| LSM5 homolog, U6 small nuclear RNA and mRNA degradation associated                     | LSM5         | 1,08 |
| potassium channel, two pore domain subfamily K, member 17                              | KCNK17       | 1,08 |
| fibronectin type III domain containing 7                                               | FNDC7        | 1,08 |
| ribosome binding factor A (putative); RBFA downstream neighbor (non-protein coding)    | RBFA; RBFADN | 1,08 |
| sema domain, immunoglobulin domain (Ig), short basic domain, secreted, (semaphorin) 3D | SEMA3D       | 1,08 |
| proline rich 14                                                                        | PRR14        | 1,08 |
| phosphodiesterase 1B, calmodulin-dependent                                             | PDE1B        | 1,08 |
| tumor protein p53 inducible nuclear protein 2                                          | TP53INP2     | 1,08 |
| NOP2/Sun domain family, member 6                                                       | NSUN6        | 1,08 |
| olfactory receptor, family 1, subfamily S, member 2                                    | OR1S2        | 1,08 |
| oxoglutarate (alpha-ketoglutarate) dehydrogenase (lipoamide)                           | OGDH         | 1,08 |
| complement component 9                                                                 | C9           | 1,08 |
| elaC ribonuclease Z 1                                                                  | ELAC1        | 1,08 |
| TATA box binding protein associated factor 3                                           | TAF3         | 1,08 |
| protein tyrosine phosphatase, receptor type, O                                         | PTPRO        | 1,08 |
| synaptotagmin-like 5                                                                   | SYTL5        | 1,08 |
| BCL2-like 14 (apoptosis facilitator)                                                   | BCL2L14      | 1,08 |
| mitochondrial translational initiation factor 2                                        | MTIF2        | 1,08 |
| chromosome 15 open reading frame 59                                                    | C15orf59     | 1,08 |
| glucosaminyl (N-acetyl) transferase family member 7                                    | GCNT7        | 1,08 |
| mitogen-activated protein kinase kinase kinase 10                                      | MAP3K10      | 1,08 |
| arginine-fifty homeobox                                                                | ARGFX        | 1,08 |
| protocadherin 20                                                                       | PCDH20       | 1,08 |
| glycine receptor alpha 4                                                               | GLRA4        | 1,08 |
| zinc finger, DHHC-type containing 3                                                    | ZDHHC3       | 1,08 |
| junctophilin 1                                                                         | JPH1         | 1,08 |
| neuronal differentiation 2                                                             | NEUROD2      | 1,08 |
| adenosine monophosphate deaminase 1                                                    | AMPD1        | 1,08 |
| olfactory receptor, family 10, subfamily H, member 4                                   | OR10H4       | 1,08 |
| integrin beta 5                                                                        | ITGB5        | 1,08 |

|                                                                                                         |                                 |      |
|---------------------------------------------------------------------------------------------------------|---------------------------------|------|
| olfactory receptor, family 52, subfamily B, member 4<br>(gene/pseudogene)                               | OR52B4                          | 1,08 |
| phenylethanolamine N-methyltransferase                                                                  | PNMT                            | 1,08 |
| Transcript Identified by AceView, Entrez Gene ID(s) 5987                                                | TRIM27                          | 1,08 |
| activating transcription factor 2                                                                       | ATF2                            | 1,08 |
| erythroblast membrane-associated protein (Scianna<br>blood group)                                       | ERMAP                           | 1,08 |
| neurensin 1                                                                                             | NRSN1                           | 1,08 |
| Kv channel interacting protein 3, calsenilin                                                            | KCNIP3                          | 1,08 |
| Memczak2013 ALT_ACCEPTOR, ALT_DONOR, coding,<br>INTERNAL, intronic best transcript NM_014938            | MLXIP                           | 1,08 |
| BTB (POZ) domain containing 17                                                                          | BTBD17                          | 1,08 |
| core-binding factor, runt domain, alpha subunit 2;<br>translocated to, 3                                | CBFA2T3                         | 1,08 |
| galanin/GMAP prepropeptide                                                                              | GAL                             | 1,08 |
| tRNA isopentenyltransferase 1                                                                           | TRIT1                           | 1,08 |
| X-linked Kx blood group related, X-linked                                                               | XKRX                            | 1,08 |
| zinc finger, C3H1-type containing                                                                       | ZFC3H1                          | 1,08 |
| promyelocytic leukemia                                                                                  | PML                             | 1,08 |
| potassium channel, inwardly rectifying subfamily J,<br>member 3                                         | KCNJ3                           | 1,08 |
| AKNA domain containing 1                                                                                | AKNAD1                          | 1,08 |
| dynein, axonemal, heavy chain 5                                                                         | DNAH5                           | 1,08 |
| UDP-Gal:betaGlcNAc beta 1,3-galactosyltransferase 5                                                     | B3GALT5                         | 1,08 |
| taste receptor, type 2, member 4                                                                        | TAS2R4                          | 1,08 |
| olfactory receptor, family 2, subfamily W, member 5<br>(gene/pseudogene)                                | OR2W5                           | 1,08 |
| ribosomal protein S4, X-linked                                                                          | RPS4X                           | 1,08 |
| alcohol dehydrogenase 1A (class I), alpha polypeptide                                                   | ADH1A                           | 1,08 |
| cAMP responsive element binding protein 3-like 1                                                        | CREB3L1                         | 1,08 |
| long intergenic non-protein coding RNA 1559                                                             | LINC01559                       | 1,08 |
| major histocompatibility complex, class II, DQ alpha 1                                                  | HLA-DQA1                        | 1,08 |
| family with sequence similarity 46, member D                                                            | FAM46D                          | 1,08 |
| olfactory receptor, family 8, subfamily D, member 4                                                     | OR8D4                           | 1,08 |
| gap junction protein delta 2                                                                            | GJD2                            | 1,08 |
| ribosomal protein S6 kinase, 90kDa, polypeptide 1                                                       | RPS6KA1                         | 1,08 |
| frizzled class receptor 10                                                                              | FZD10                           | 1,08 |
| neuronal tyrosine-phosphorylated phosphoinositide-3-<br>kinase adaptor 1                                | NYAP1                           | 1,08 |
| A kinase (PRKA) anchor protein 6                                                                        | AKAP6                           | 1,08 |
| transcription factor 19                                                                                 | TCF19                           | 1,08 |
| transmembrane protein 253                                                                               | TMEM253                         | 1,08 |
| POC1 centriolar protein B; POC1B-GALNT4 readthrough;<br>polypeptide N-acetylgalactosaminyltransferase 4 | POC1B; POC1B-<br>GALNT4; GALNT4 | 1,08 |

|                                                                                           |            |      |
|-------------------------------------------------------------------------------------------|------------|------|
| KIAA1024-like                                                                             | KIAA1024L  | 1,08 |
| family with sequence similarity 53, member A                                              | FAM53A     | 1,08 |
| TBK1 binding protein 1                                                                    | TBKBP1     | 1,08 |
| GLI pathogenesis-related 1 like 2                                                         | GLIPR1L2   | 1,08 |
| NK2 homeobox 2                                                                            | NKX2-2     | 1,08 |
| mastermind-like transcriptional coactivator 1                                             | MAML1      | 1,08 |
| PIK3CD antisense RNA 1                                                                    | PIK3CD-AS1 | 1,08 |
| luteinizing hormone beta polypeptide                                                      | LHB        | 1,08 |
| ankyrin repeat domain 49                                                                  | ANKRD49    | 1,08 |
| outer dense fiber of sperm tails 3-like 1                                                 | ODF3L1     | 1,08 |
| fatty acyl-CoA reductase 2                                                                | FAR2       | 1,08 |
| ADP-ribosylation factor GTPase activating protein 2                                       | ARFGAP2    | 1,08 |
| tryptophan rich basic protein                                                             | WRB        | 1,08 |
| interleukin 1 receptor-like 1                                                             | IL1RL1     | 1,08 |
| neuropeptide Y receptor Y5                                                                | NPY5R      | 1,08 |
| ADAM metallopeptidase with thrombospondin type 1 motif 13                                 | ADAMTS13   | 1,08 |
| translocation associated membrane protein 2                                               | TRAM2      | 1,08 |
| placenta specific 4                                                                       | PLAC4      | 1,08 |
| sorting nexin 32                                                                          | SNX32      | 1,08 |
| renalase, FAD-dependent amine oxidase                                                     | RNLS       | 1,08 |
| decorin                                                                                   | DCN        | 1,08 |
| Transcript Identified by AceView, Entrez Gene ID(s) 23355                                 | VPS8       | 1,08 |
| synaptotagmin I                                                                           | SYT1       | 1,08 |
| synaptotagmin XVI                                                                         | SYT16      | 1,08 |
| Zic family member 1                                                                       | ZIC1       | 1,08 |
| Salzman2013 ALT_ACCEPTOR, ALT_DONOR, coding, INTERNAL, intronic best transcript NM_007112 | THBS3      | 1,08 |
| tumor protein p73                                                                         | TP73       | 1,08 |
| ubiquitin specific peptidase 35                                                           | USP35      | 1,08 |
| interleukin 1 family, member 10 (theta)                                                   | IL1F10     | 1,08 |
| MAM domain containing glycosylphosphatidylinositol anchor 2                               | MDGA2      | 1,08 |
| solute carrier family 1 (neutral amino acid transporter), member 5                        | SLC1A5     | 1,08 |
| vomer nasal 1 receptor 3 (gene/pseudogene)                                                | VN1R3      | 1,08 |
| UDP-glucose pyrophosphorylase 2                                                           | UGP2       | 1,08 |
| zinc finger protein 623                                                                   | ZNF623     | 1,08 |
| ribosomal protein S28                                                                     | RPS28      | 1,07 |
| fibrillin 2                                                                               | FBN2       | 1,07 |
| PRAME family member 6 [Source:HGNC Symbol;Acc:HGNC:30583]                                 | PRAMEF6    | 1,07 |
| PRAME family member 6 [Source:HGNC Symbol;Acc:HGNC:30583]                                 | PRAMEF6    | 1,07 |

|                                                                                         |                                        |      |
|-----------------------------------------------------------------------------------------|----------------------------------------|------|
| t-SNARE domain containing 1                                                             | TSNARE1                                | 1,07 |
| serpin peptidase inhibitor, clade B (ovalbumin), member 13                              | SERPINB13                              | 1,07 |
| carbonic anhydrase VII                                                                  | CA7                                    | 1,07 |
| Rho GTPase activating protein 39                                                        | ARHGAP39                               | 1,07 |
| zinc finger protein 575                                                                 | ZNF575                                 | 1,07 |
| bactericidal/permeability-increasing protein                                            | BPI                                    | 1,07 |
| BTB (POZ) domain containing 6                                                           | BTBD6                                  | 1,07 |
| B-cell scaffold protein with ankyrin repeats 1                                          | BANK1                                  | 1,07 |
| MLX interacting protein                                                                 | MLXIP                                  | 1,07 |
| homeobox D8                                                                             | HOXD8                                  | 1,07 |
| Jeck2013 ALT_ACCEPTOR, ALT_DONOR, coding, INTERNAL, intronic best transcript NM_004996  | ABCC1                                  | 1,07 |
| sarcospan                                                                               | SSPN                                   | 1,07 |
| carboxyl ester lipase                                                                   | CEL                                    | 1,07 |
| Zhang2013 ALT_ACCEPTOR, ALT_DONOR, coding, INTERNAL, intronic best transcript NM_002882 | RANBP1                                 | 1,07 |
| olfactory receptor, family 52, subfamily D, member 1                                    | OR52D1                                 | 1,07 |
| family with sequence similarity 27, member E3                                           | FAM27E3                                | 1,07 |
| rhophilin associated tail protein 1                                                     | ROPN1                                  | 1,07 |
| regenerating islet-derived 3 gamma                                                      | REG3G                                  | 1,07 |
| solute carrier family 22 (organic cation/zwitterion transporter), member 4              | SLC22A4                                | 1,07 |
| melanocortin 5 receptor                                                                 | MC5R                                   | 1,07 |
| plexin C1                                                                               | PLXNC1                                 | 1,07 |
| small integral membrane protein 10 like 1                                               | SMIM10L1                               | 1,07 |
| bromodomain adjacent to zinc finger domain 2A                                           | BAZ2A                                  | 1,07 |
| coiled-coil domain containing 22                                                        | CCDC22                                 | 1,07 |
| calcium/calmodulin-dependent protein kinase IG                                          | CAMK1G                                 | 1,07 |
| G protein-coupled receptor 183                                                          | GPR183                                 | 1,07 |
| thyroid hormone receptor interactor 11                                                  | TRIP11                                 | 1,07 |
| ankyrin repeat and SOCS box containing 6                                                | ASB6                                   | 1,07 |
| transmembrane protein 132D                                                              | TMEM132D                               | 1,07 |
| transcription factor AP-2 beta (activating enhancer binding protein 2 beta)             | TFAP2B                                 | 1,07 |
| homer scaffolding protein 3                                                             | HOMER3                                 | 1,07 |
| lymphoid-restricted membrane protein                                                    | LRMP                                   | 1,07 |
| uncharacterized LOC100144595; novel transcript; Transcript Identified by AceView        | LOC100144595;<br>AC009227.2;<br>tikure | 1,07 |
| transmembrane 4 L six family member 1                                                   | TM4SF1                                 | 1,07 |
| UDP-GlcNAc:betaGal beta-1,3-N-acetylglucosaminyltransferase 8                           | B3GNT8                                 | 1,07 |
| ankyrin repeat and SOCS box containing 15                                               | ASB15                                  | 1,07 |

|                                                                          |                                 |      |
|--------------------------------------------------------------------------|---------------------------------|------|
| olfactory receptor, family 1, subfamily D, member 4<br>(gene/pseudogene) | OR1D4                           | 1,07 |
| lipase A, lysosomal acid, cholesterol esterase                           | LIPA                            | 1,07 |
| proline rich 18                                                          | PRR18                           | 1,07 |
| RNA binding motif protein, X-linked 2                                    | RBMX2                           | 1,07 |
| family with sequence similarity 177, member A1                           | FAM177A1                        | 1,07 |
| BCL2-like 14 (apoptosis facilitator)                                     | BCL2L14                         | 1,07 |
| phospholipid scramblase family, member 5                                 | PLSCR5                          | 1,07 |
| GIN5 complex subunit 3 (Psf3 homolog)                                    | GIN53                           | 1,07 |
| dual specificity tyrosine-(Y)-phosphorylation regulated<br>kinase 1B     | DYRK1B                          | 1,07 |
| chemokine (C-C motif) ligand 3                                           | CCL3                            | 1,07 |
| protein phosphatase 6, regulatory subunit 1                              | PPP6R1                          | 1,07 |
| zinc finger protein 208                                                  | ZNF208                          | 1,07 |
| chemokine (C-C motif) ligand 17                                          | CCL17                           | 1,07 |
| G antigen 12C; G antigen 12E; G antigen 12H                              | GAGE12C;<br>GAGE12E;<br>GAGE12H | 1,07 |
| zinc finger protein 665                                                  | ZNF665                          | 1,07 |
| lysine (K)-specific demethylase 4E                                       | KDM4E                           | 1,07 |
| FERM domain containing 8                                                 | FRMD8                           | 1,07 |
| lectin, galactoside-binding-like                                         | LGALSL                          | 1,07 |
| solute carrier family 26 (anion exchanger), member 7                     | SLC26A7                         | 1,07 |
| ADAM metallopeptidase with thrombospondin type 1<br>motif 3              | ADAMTS3                         | 1,07 |
| cyclin-dependent kinase 15                                               | CDK15                           | 1,07 |
| EF-hand calcium binding domain 6                                         | EFCAB6                          | 1,07 |
| PRAME family member 12                                                   | PRAMEF12                        | 1,07 |
| sperm flagellar 2                                                        | SPEF2                           | 1,07 |
| forkhead box R1                                                          | FOXR1                           | 1,07 |
| keratin associated protein 4-2                                           | KRTAP4-2                        | 1,07 |
| retinitis pigmentosa 1-like 1                                            | RP1L1                           | 1,07 |
| RAS-like, family 10, member A                                            | RASL10A                         | 1,07 |
| rabenosyn, RAB effector                                                  | RBSN                            | 1,07 |
| zyg-11 family member A, cell cycle regulator                             | ZYG11A                          | 1,07 |
| Transcript Identified by AceView, Entrez Gene ID(s) 57448                | BIRC6                           | 1,07 |
| hydroxyacylglutathione hydrolase-like                                    | HAGHL                           | 1,07 |
| homeobox C13                                                             | HOXC13                          | 1,07 |
| proline/histidine/glycine-rich 1                                         | PHGR1                           | 1,07 |
| zinc finger protein 793                                                  | ZNF793                          | 1,07 |
| cyclin-dependent kinase-like 2 (CDC2-related kinase)                     | CDKL2                           | 1,07 |
| retinol dehydrogenase 5 (11-cis/9-cis)                                   | RDH5                            | 1,07 |
| SOGA family member 3; KIAA0408                                           | SOGA3; KIAA0408                 | 1,07 |

|                                                                                                                                                                |                                       |      |
|----------------------------------------------------------------------------------------------------------------------------------------------------------------|---------------------------------------|------|
| TATA box binding protein (TBP)-associated factor, RNA polymerase I, C, 110kDa                                                                                  | TAF1C                                 | 1,07 |
| transmembrane protein 190                                                                                                                                      | TMEM190                               | 1,07 |
| sorting nexin family member 30                                                                                                                                 | SNX30                                 | 1,07 |
| YTH N(6)-methyladenosine RNA binding protein 3                                                                                                                 | YTHDF3                                | 1,07 |
| olfactory receptor, family 13, subfamily C, member 9                                                                                                           | OR13C9                                | 1,07 |
| calcium binding protein 2                                                                                                                                      | CABP2                                 | 1,07 |
| cyclin-dependent kinase 5, regulatory subunit 2 (p39)                                                                                                          | CDK5R2                                | 1,07 |
| keratin 28, type I                                                                                                                                             | KRT28                                 | 1,07 |
| methyltransferase like 13                                                                                                                                      | METTL13                               | 1,07 |
| macrophage stimulating 1 receptor                                                                                                                              | MST1R                                 | 1,07 |
| testis expressed sequence 13-like                                                                                                                              | LOC100129520                          | 1,07 |
| mitogen-activated protein kinase kinase kinase kinase 3                                                                                                        | MAP4K3                                | 1,07 |
| Memczak2013 ANTISENSE, INTERNAL, intronic, ncRNA best transcript NR_024568                                                                                     | FBXO31                                | 1,07 |
| double C2-like domains, alpha                                                                                                                                  | DOC2A                                 | 1,07 |
| zonadhesin (gene/pseudogene)                                                                                                                                   | ZAN                                   | 1,07 |
| uncharacterized LOC101927572; Memczak2013 ANTISENSE, CDS, coding, INTERNAL, intronic best transcript NM_015526; novel transcript, antisense to CLIP3 and THAP8 | LOC101927572;<br>AC002116.7;<br>CLIP3 | 1,07 |
| StAR-related lipid transfer domain containing 5                                                                                                                | STARD5                                | 1,07 |
| BCL2-like 14 (apoptosis facilitator)                                                                                                                           | BCL2L14                               | 1,07 |
| dynein, axonemal, intermediate chain 1                                                                                                                         | DNAI1                                 | 1,07 |
| tigger transposable element derived 6                                                                                                                          | TIGD6                                 | 1,07 |
| FERM and PDZ domain containing 2                                                                                                                               | FRMPD2                                | 1,07 |
| chromosome 9 open reading frame 91                                                                                                                             | C9orf91                               | 1,07 |
| proline/arginine-rich end leucine-rich repeat protein                                                                                                          | PRELP                                 | 1,07 |
| solute carrier family 26, member 10                                                                                                                            | SLC26A10                              | 1,07 |
| murine retrovirus integration site 1 homolog                                                                                                                   | MRVI1                                 | 1,07 |
| chromosome 6 open reading frame 118                                                                                                                            | C6orf118                              | 1,07 |
| zinc finger protein 469                                                                                                                                        | ZNF469                                | 1,07 |
| ALG9, alpha-1,2-mannosyltransferase                                                                                                                            | ALG9                                  | 1,07 |
| nucleosome assembly protein 1-like 2                                                                                                                           | NAP1L2                                | 1,07 |
| mediator of DNA-damage checkpoint 1                                                                                                                            | MDC1                                  | 1,07 |
| proteasome 26S subunit, non-ATPase 7                                                                                                                           | PSMD7                                 | 1,07 |
| Memczak2013 ALT_ACCEPTOR, ALT_DONOR, coding, INTERNAL, intronic best transcript NM_014957                                                                      | DENND3                                | 1,07 |
| chemokine (C-C motif) ligand 4-like 2; chemokine (C-C motif) ligand 4-like 1                                                                                   | CCL4L2; CCL4L1                        | 1,07 |
| deleted in azoospermia 3                                                                                                                                       | DAZ3                                  | 1,07 |
| dipeptidyl-peptidase 7                                                                                                                                         | DPP7                                  | 1,07 |
| homeobox A5                                                                                                                                                    | HOXA5                                 | 1,07 |
| pyridine nucleotide-disulphide oxidoreductase domain 2; microRNA 1287                                                                                          | PYROXD2;<br>MIR1287                   | 1,07 |

|                                                                                           |                |      |
|-------------------------------------------------------------------------------------------|----------------|------|
| solute carrier family 22 (organic anion/urate transporter), member 13                     | SLC22A13       | 1,07 |
| cystatin 9-like                                                                           | CST9L          | 1,07 |
| adherens junctions associated protein 1                                                   | AJAP1          | 1,07 |
| S100 calcium binding protein Z                                                            | S100Z          | 1,07 |
| Memczak2013 ALT_ACCEPTOR, ALT_DONOR, coding, INTERNAL, intronic best transcript NM_022172 | PC             | 1,07 |
| aminopeptidase puromycin sensitive                                                        | NPEPPS         | 1,07 |
| testis-specific serine kinase 3                                                           | TSSK3          | 1,07 |
| zinc finger protein 257                                                                   | ZNF257         | 1,07 |
| Memczak2013 ANTISENSE, CDS, coding, INTERNAL best transcript NM_133502                    | ZNF274         | 1,07 |
| interleukin 27                                                                            | IL27           | 1,07 |
| keratin 86, type II                                                                       | KRT86          | 1,07 |
| PRAME family member 19<br>[Source:EntrezGene;Acc:645414]                                  | PRAMEF19       | 1,07 |
| exonuclease 3-5 domain containing 1                                                       | EXD1           | 1,07 |
| NACHT and WD repeat domain containing 1                                                   | NWD1           | 1,07 |
| collagen, type XXII, alpha 1                                                              | COL22A1        | 1,07 |
| aquaporin 12B                                                                             | AQP12B         | 1,07 |
| ankyrin repeat and SOCS box containing 10                                                 | ASB10          | 1,07 |
| 3-hydroxymethyl-3-methylglutaryl-CoA lyase                                                | HMGCL          | 1,07 |
| MAS-related GPR, member X1                                                                | MRGPRX1        | 1,07 |
| interleukin 16                                                                            | IL16           | 1,07 |
| cytochrome b5 domain containing 1                                                         | CYB5D1         | 1,07 |
| grainyhead-like transcription factor 3                                                    | GRHL3          | 1,07 |
| synaptonemal complex protein 2                                                            | SYCP2          | 1,07 |
| KIAA0226-like                                                                             | KIAA0226L      | 1,07 |
| leucine rich repeat containing 74A                                                        | LRRC74A        | 1,07 |
| junctophilin 3                                                                            | JPH3           | 1,07 |
| hypocretin (orexin) receptor 2                                                            | HCRTR2         | 1,07 |
| transmembrane protein 175                                                                 | TMEM175        | 1,07 |
| coiled-coil domain containing 57                                                          | CCDC57         | 1,07 |
| syntaxin 6                                                                                | STX6           | 1,07 |
| stimulator of chondrogenesis 1                                                            | SCRG1          | 1,07 |
| arachidonate 15-lipoxygenase                                                              | ALOX15         | 1,07 |
| tripartite motif family like 1                                                            | TRIML1         | 1,07 |
| formin homology 2 domain containing 1                                                     | FHOD1          | 1,07 |
| thyroid hormone receptor interactor 6; microRNA 6875                                      | TRIP6; MIR6875 | 1,07 |
| cornichon family AMPA receptor auxiliary protein 3                                        | CNIH3          | 1,07 |
| zinc finger protein 214                                                                   | ZNF214         | 1,07 |
| cingulin                                                                                  | CGN            | 1,07 |
| insulin-like 3 (Leydig cell)                                                              | INSL3          | 1,07 |
| melatonin receptor 1A                                                                     | MTNR1A         | 1,07 |
| zinc finger protein 561                                                                   | ZNF561         | 1,07 |



|                                                                                                               |              |      |
|---------------------------------------------------------------------------------------------------------------|--------------|------|
| guanylate cyclase 1, soluble, alpha 3                                                                         | GUCY1A3      | 1,07 |
| HtrA serine peptidase 4                                                                                       | HTRA4        | 1,07 |
| eukaryotic translation initiation factor 2D                                                                   | EIF2D        | 1,07 |
| olfactory receptor family 10 subfamily A member 6<br>(gene/pseudogene) [Source:HGNC<br>Symbol;Acc:HGNC:15132] | OR10A6       | 1,07 |
| dynein, axonemal, heavy chain 7                                                                               | DNAH7        | 1,07 |
| proteasome subunit alpha 1                                                                                    | PSMA1        | 1,07 |
| ethanolamine kinase 2                                                                                         | ETNK2        | 1,07 |
| olfactory receptor, family 2, subfamily M, member 4                                                           | OR2M4        | 1,07 |
| Rho GTPase activating protein 20                                                                              | ARHGAP20     | 1,07 |
| karyopherin alpha 2 (RAG cohort 1, importin alpha 1)                                                          | KPNA2        | 1,07 |
| Jeck2013 ANTISENSE, CDS, coding, INTERNAL, intronic,<br>OVCODE, OVEXON best transcript NM_017491              | WDR1         | 1,07 |
| integral membrane protein 2A                                                                                  | ITM2A        | 1,07 |
| lysine (K)-specific methyltransferase 2C                                                                      | KMT2C        | 1,07 |
| BCL2 associated athanogene 6                                                                                  | BAG6         | 1,07 |
| glycophorin E (MNS blood group)                                                                               | GYPE         | 1,07 |
| nuclear cap binding protein subunit 2                                                                         | NCBP2        | 1,07 |
| histone cluster 1, H4h                                                                                        | HIST1H4H     | 1,07 |
| family with sequence similarity 163, member B                                                                 | FAM163B      | 1,07 |
| terminal uridylyl transferase 1, U6 snRNA-specific                                                            | TUT1         | 1,07 |
| chromosome 10 open reading frame 55                                                                           | C10orf55     | 1,07 |
| atypical chemokine receptor 4                                                                                 | ACKR4        | 1,07 |
| caspase recruitment domain family, member 11                                                                  | CARD11       | 1,07 |
| SAM pointed domain containing ETS transcription factor                                                        | SPDEF        | 1,07 |
| POU class 2 associating factor 1                                                                              | POU2AF1      | 1,07 |
| potassium channel, voltage gated KQT-like subfamily Q,<br>member 2                                            | KCNQ2        | 1,07 |
| corneodesmosin                                                                                                | CDSN         | 1,07 |
| spindle and kinetochore associated complex subunit 2                                                          | SKA2         | 1,07 |
| membrane associated ring finger 1                                                                             | MARCH1       | 1,07 |
| olfactory receptor, family 13, subfamily F, member 1                                                          | OR13F1       | 1,07 |
| serine palmitoyltransferase, long chain base subunit 1                                                        | SPTLC1       | 1,07 |
| angiopoietin like 6                                                                                           | ANGPTL6      | 1,07 |
| zinc finger, BED-type containing 1;<br>dehydrogenase/reductase (SDR family) X-linked                          | ZBED1; DHRSX | 1,07 |
| taste receptor, type 1, member 1                                                                              | TAS1R1       | 1,07 |
| Memczak2013 ANTISENSE, coding, INTERNAL, intronic<br>best transcript NM_001098633                             | AKT1S1       | 1,07 |
| teashirt zinc finger homeobox 2                                                                               | TSHZ2        | 1,07 |
| zinc finger protein 813                                                                                       | ZNF813       | 1,07 |
| ankyrin repeat domain 27 (VPS9 domain)                                                                        | ANKRD27      | 1,07 |
| coiled-coil domain containing 159                                                                             | CCDC159      | 1,07 |
| family with sequence similarity 84, member A                                                                  | FAM84A       | 1,07 |

|                                                                                                 |                  |      |
|-------------------------------------------------------------------------------------------------|------------------|------|
| amine oxidase, copper containing 1                                                              | AOC1             | 1,07 |
| luteinizing hormone/choriogonadotropin receptor                                                 | LHCGR            | 1,07 |
| hyperpolarization activated cyclic nucleotide gated potassium channel 3                         | HCN3             | 1,07 |
| solute carrier family 41, member 3                                                              | SLC41A3          | 1,07 |
| cell adhesion molecule 2                                                                        | CADM2            | 1,07 |
| synuclein beta                                                                                  | SNCB             | 1,07 |
| DEAD (Asp-Glu-Ala-Asp) box polypeptide 4                                                        | DDX4             | 1,07 |
| pro-platelet basic protein                                                                      | PPBP             | 1,07 |
| methyl-CpG binding domain protein 5                                                             | MBD5             | 1,07 |
| collagen, type XXIV, alpha 1                                                                    | COL24A1          | 1,07 |
| FBJ murine osteosarcoma viral oncogene homolog B                                                | FOSB             | 1,07 |
| family with sequence similarity 180, member A                                                   | FAM180A          | 1,07 |
| growth hormone secretagogue receptor                                                            | GHSR             | 1,07 |
| visual system homeobox 1                                                                        | VSX1             | 1,07 |
| MCF.2 cell line derived transforming sequence-like 2                                            | MCF2L2           | 1,07 |
| podocan-like 1                                                                                  | PODNL1           | 1,07 |
| NADH dehydrogenase (ubiquinone) 1 alpha subcomplex, 10, 42kDa                                   | NDUFA10          | 1,07 |
| nephroblastoma overexpressed                                                                    | NOV              | 1,07 |
| tumor necrosis factor                                                                           | TNF              | 1,07 |
| mannose-binding lectin (protein A) 1, pseudogene; BMS1 ribosome biogenesis factor pseudogene 21 | MBL1P; BMS1P21   | 1,07 |
| Rho GTPase activating protein 22                                                                | ARHGAP22         | 1,07 |
| family with sequence similarity 234, member A; Rho GDP dissociation inhibitor (GDI) gamma       | FAM234A; ARHGDIG | 1,07 |
| UDP glycosyltransferase 3 family, polypeptide A2                                                | UGT3A2           | 1,07 |
| serine/threonine kinase receptor associated protein                                             | STRAP            | 1,07 |
| Transcript Identified by AceView, Entrez Gene ID(s) 79781                                       | IQCA1            | 1,07 |
| fibroblast growth factor 19                                                                     | FGF19            | 1,07 |
| four and a half LIM domains 1                                                                   | FHL1             | 1,07 |
| butyrophilin-like 9                                                                             | BTNL9            | 1,07 |
| GLIS family zinc finger 1                                                                       | GLIS1            | 1,07 |
| phosphatidylinositol-5-phosphate 4-kinase, type II, alpha                                       | PIP4K2A          | 1,07 |
| eukaryotic translation initiation factor 4E family member 2                                     | EIF4E2           | 1,07 |
| sorting nexin 11                                                                                | SNX11            | 1,07 |
| neural cell adhesion molecule 1                                                                 | NCAM1            | 1,07 |
| pancreatic and duodenal homeobox 1                                                              | PDX1             | 1,07 |
| mesogenin 1                                                                                     | MSGN1            | 1,07 |
| F-box and leucine-rich repeat protein 22                                                        | FBXL22           | 1,07 |
| family with sequence similarity 83, member B                                                    | FAM83B           | 1,07 |

|                                                                                                                                |                             |      |
|--------------------------------------------------------------------------------------------------------------------------------|-----------------------------|------|
| peptidyl-prolyl cis-trans isomerase A-like 4G; Peptidyl-prolyl cis-trans isomerase<br>[Source:UniProtKB/TrEMBL;Acc:A0A075B767] | LOC105371242;<br>AC243756.1 | 1,07 |
| bone morphogenetic protein 4                                                                                                   | BMP4                        | 1,07 |
| chromosome transmission fidelity factor 18                                                                                     | CHTF18                      | 1,07 |
| Transcript Identified by AceView, Entrez Gene ID(s) 60468                                                                      | BACH2                       | 1,07 |
| secretory carrier membrane protein 2                                                                                           | SCAMP2                      | 1,07 |
| midline 1                                                                                                                      | MID1                        | 1,07 |
| immunoglobulin superfamily, member 5                                                                                           | IGSF5                       | 1,07 |
| leucine rich repeat containing 31                                                                                              | LRRC31                      | 1,07 |
| tRNA phosphotransferase 1                                                                                                      | TRPT1                       | 1,07 |
| zinc finger protein 197                                                                                                        | ZNF197                      | 1,07 |
| autophagy related 16-like 1                                                                                                    | ATG16L1                     | 1,07 |
| coiled-coil domain containing 152                                                                                              | CCDC152                     | 1,07 |
| protein phosphatase 1, regulatory subunit 16A                                                                                  | PPP1R16A                    | 1,07 |
| ring finger protein 181                                                                                                        | RNF181                      | 1,07 |
| replication factor C subunit 3                                                                                                 | RFC3                        | 1,07 |
| KRTAP5-1/KRTAP5-2 antisense RNA 1                                                                                              | KRTAP5-AS1                  | 1,07 |
| PMS1 homolog 2, mismatch repair system component                                                                               | PMS2                        | 1,07 |
| coiled-coil domain containing 175                                                                                              | CCDC175                     | 1,07 |
| microfibrillar associated protein 3                                                                                            | MFAP3                       | 1,07 |
| solute carrier family 6 (neurotransmitter transporter), member 13                                                              | SLC6A13                     | 1,07 |
| cytochrome c oxidase subunit VIa polypeptide 2                                                                                 | COX6A2                      | 1,07 |
| transmembrane protein 255B                                                                                                     | TMEM255B                    | 1,07 |
| tripartite motif containing 43                                                                                                 | TRIM43                      | 1,07 |
| core 1 synthase, glycoprotein-N-acetylgalactosamine 3-beta-galactosyltransferase 1                                             | C1GALT1                     | 1,07 |
| lactate dehydrogenase A-like 6A                                                                                                | LDHAL6A                     | 1,07 |
| immunoglobulin superfamily, member 9                                                                                           | IGSF9                       | 1,07 |
| ATP synthase, H <sup>+</sup> transporting, mitochondrial Fo complex subunit D                                                  | ATP5H                       | 1,06 |
| MAGE family member B5                                                                                                          | MAGEB5                      | 1,06 |
| lipocalin 2                                                                                                                    | LCN2                        | 1,06 |
| SH3-domain GRB2-like (endophilin) interacting protein 1                                                                        | SGIP1                       | 1,06 |
| proteasome 26S subunit, non-ATPase 3                                                                                           | PSMD3                       | 1,06 |
| poly(ADP-ribose) polymerase family member 16                                                                                   | PARP16                      | 1,06 |
| transcription factor 20 (AR1)                                                                                                  | TCF20                       | 1,06 |
| transcription factor 20 (AR1)                                                                                                  | TCF20                       | 1,06 |
| polymerase (RNA) I polypeptide E                                                                                               | POLR1E                      | 1,06 |
| cholinergic receptor, nicotinic gamma                                                                                          | CHRNA7                      | 1,06 |
| Memczak2013 ALT_ACCEPTOR, ALT_DONOR, coding, INTERNAL, intronic best transcript NM_014713                                      | LAPTM4A                     | 1,06 |

|                                                                                                  |                     |      |
|--------------------------------------------------------------------------------------------------|---------------------|------|
| chromosome 7 open reading frame 57                                                               | C7orf57             | 1,06 |
| sperm flagellar 1                                                                                | SPEF1               | 1,06 |
| neuropeptides B/W receptor 1                                                                     | NPBWR1              | 1,06 |
| potassium channel, voltage gated shaker related subfamily A, member 5                            | KCNA5               | 1,06 |
| keratin 79, type II                                                                              | KRT79               | 1,06 |
| discoidin domain receptor tyrosine kinase 2                                                      | DDR2                | 1,06 |
| homeobox C6; homeobox C4; homeobox C5                                                            | HOXC6; HOXC4; HOXC5 | 1,06 |
| leucine-rich repeats and calponin homology (CH) domain containing 2                              | LRCH2               | 1,06 |
| ubiquitin A-52 residue ribosomal protein fusion product 1                                        | UBA52               | 1,06 |
| ATPase, H <sup>+</sup> transporting, lysosomal 42kDa, V1 subunit C2                              | ATP6V1C2            | 1,06 |
| polypeptide N-acetylgalactosaminyltransferase 11                                                 | GALNT11             | 1,06 |
| scleraxis bHLH transcription factor                                                              | SCX                 | 1,06 |
| cancer/testis antigen 83                                                                         | CT83                | 1,06 |
| KIAA1644                                                                                         | KIAA1644            | 1,06 |
| T-cell acute lymphocytic leukemia 1                                                              | TAL1                | 1,06 |
| small integral membrane protein 7; mediator complex subunit 26                                   | SMIM7; MED26        | 1,06 |
| retinitis pigmentosa GTPase regulator interacting protein 1                                      | RPGRIP1             | 1,06 |
| mannose receptor, C type 1                                                                       | MRC1                | 1,06 |
| Transcript Identified by AceView, Entrez Gene ID(s) 90485                                        | ZNF835              | 1,06 |
| Memczak2013 ANTISENSE, coding, INTERNAL, intronic best transcript NM_001040442                   | FABP6               | 1,06 |
| CKLF-CMTM1 readthrough                                                                           | CKLF-CMTM1          | 1,06 |
| tripartite motif containing 49C                                                                  | TRIM49C             | 1,06 |
| zinc finger and BTB domain containing 9                                                          | ZBTB9               | 1,06 |
| nebulin-related anchoring protein                                                                | NRAP                | 1,06 |
| HORMA domain containing 2                                                                        | HORMAD2             | 1,06 |
| chronic lymphocytic leukemia up-regulated 1 opposite strand                                      | CLLU1OS             | 1,06 |
| proline rich 23A                                                                                 | PRR23A              | 1,06 |
| chromosome 5 open reading frame 60                                                               | C5orf60             | 1,06 |
| mitochondrial ribosomal protein S7                                                               | MRPS7               | 1,06 |
| phospholipase C, beta 4                                                                          | PLCB4               | 1,06 |
| deiodinase, iodothyronine, type III                                                              | DIO3                | 1,06 |
| death associated protein like 1; olfactory receptor, family 7, subfamily E, member 89 pseudogene | DAPL1; OR7E89P      | 1,06 |
| zinc finger protein 138                                                                          | ZNF138              | 1,06 |
| Fanconi anemia complementation group I                                                           | FANCI               | 1,06 |

|                                                                                                                                                                                   |                                 |      |
|-----------------------------------------------------------------------------------------------------------------------------------------------------------------------------------|---------------------------------|------|
| CD300c molecule                                                                                                                                                                   | CD300C                          | 1,06 |
| UNC homeobox                                                                                                                                                                      | UNCX                            | 1,06 |
| RNA binding motif protein 42                                                                                                                                                      | RBM42                           | 1,06 |
| stathmin domain containing 1                                                                                                                                                      | STMND1                          | 1,06 |
| ADIRF antisense RNA 1 [Source:HGNC Symbol;Acc:HGNC:45127]; Transcript Identified by AceView, Entrez Gene ID(s) 79812; ADIRF antisense RNA 1; novel transcript, antisense to ADIRF | ADIRF-AS1; RP11-96C23.15; MMRN2 | 1,06 |
| golgin A6 family, member B                                                                                                                                                        | GOLGA6B                         | 1,06 |
| mitochondrial calcium uptake 2                                                                                                                                                    | MICU2                           | 1,06 |
| zinc finger protein 408                                                                                                                                                           | ZNF408                          | 1,06 |
| neuron navigator 1                                                                                                                                                                | NAV1                            | 1,06 |
| adenylate cyclase 3                                                                                                                                                               | ADCY3                           | 1,06 |
| peptide YY                                                                                                                                                                        | PYY                             | 1,06 |
| kinesin family member 26A                                                                                                                                                         | KIF26A                          | 1,06 |
| leishmanolysin-like (metallopeptidase M8 family)                                                                                                                                  | LMLN                            | 1,06 |
| triadin                                                                                                                                                                           | TRDN                            | 1,06 |
| transmembrane protease, serine 7                                                                                                                                                  | TMPRSS7                         | 1,06 |
| NLR family, pyrin domain containing 7                                                                                                                                             | NLRP7                           | 1,06 |
| protein phosphatase 1, regulatory subunit 37                                                                                                                                      | PPP1R37                         | 1,06 |
| G-patch domain containing 3                                                                                                                                                       | GPATCH3                         | 1,06 |
| lipase, family member J                                                                                                                                                           | LIPJ                            | 1,06 |
| solute carrier family 22 (organic cation transporter), member 2                                                                                                                   | SLC22A2                         | 1,06 |
| FEZ family zinc finger 2                                                                                                                                                          | FEZF2                           | 1,06 |
| nucleoporin 62kDa C-terminal like                                                                                                                                                 | NUP62CL                         | 1,06 |
| xylulokinase homolog (H. influenzae)                                                                                                                                              | XYLB                            | 1,06 |
| xin actin binding repeat containing 1                                                                                                                                             | XIRP1                           | 1,06 |
| DnaJ (Hsp40) homolog, subfamily C, member 11                                                                                                                                      | DNAJC11                         | 1,06 |
| janus kinase and microtubule interacting protein 1                                                                                                                                | JAKMIP1                         | 1,06 |
| neuronal PAS domain protein 4                                                                                                                                                     | NPAS4                           | 1,06 |
| pentraxin 4, long                                                                                                                                                                 | PTX4                            | 1,06 |
| taste receptor, type 2, member 9                                                                                                                                                  | TAS2R9                          | 1,06 |
| keratin associated protein 21-3                                                                                                                                                   | KRTAP21-3                       | 1,06 |
| HOXB cluster antisense RNA 3                                                                                                                                                      | HOXB-AS3                        | 1,06 |
| exportin 1                                                                                                                                                                        | XPO1                            | 1,06 |
| exocyst complex component 2                                                                                                                                                       | EXOC2                           | 1,06 |
| glutamine-rich 1                                                                                                                                                                  | QRICH1                          | 1,06 |
| COMM domain containing 7                                                                                                                                                          | COMMD7                          | 1,06 |
| outer dense fiber of sperm tails 3B                                                                                                                                               | ODF3B                           | 1,06 |
| dynein, cytoplasmic 1, light intermediate chain 1                                                                                                                                 | DYNC1LI1                        | 1,06 |
| bradykinin receptor B1                                                                                                                                                            | BDKRB1                          | 1,06 |
| family with sequence similarity 71, member F1                                                                                                                                     | FAM71F1                         | 1,06 |
| alkaline phosphatase, intestinal                                                                                                                                                  | ALPI                            | 1,06 |
| zinc finger protein 197                                                                                                                                                           | ZNF197                          | 1,06 |

|                                                                                                                  |                |      |
|------------------------------------------------------------------------------------------------------------------|----------------|------|
| LYR motif containing 2                                                                                           | LYRM2          | 1,06 |
| ARMCX5-GPRASP2 readthrough                                                                                       | ARMCX5-GPRASP2 | 1,06 |
| olfactory receptor, family 7, subfamily G, member 2                                                              | OR7G2          | 1,06 |
| zinc finger, C2HC-type containing 1C                                                                             | ZC2HC1C        | 1,06 |
| TSR2, 20S rRNA accumulation, homolog (S. cerevisiae)                                                             | TSR2           | 1,06 |
| Zhang2013 ALT_ACCEPTOR, ALT_DONOR, coding, INTERNAL, intronic best transcript NM_012398                          | PIP5K1C        | 1,06 |
| zinc finger protein 106                                                                                          | ZNF106         | 1,06 |
| sema domain, immunoglobulin domain (Ig), transmembrane domain (TM) and short cytoplasmic domain, (semaphorin) 4A | SEMA4A         | 1,06 |
| coiled-coil domain containing 13                                                                                 | CCDC13         | 1,06 |
| prostate and testis expressed 3                                                                                  | PATE3          | 1,06 |
| suppressor of variegation 3-9 homolog 1 (Drosophila)                                                             | SUV39H1        | 1,06 |
| G protein-coupled receptor 161                                                                                   | GPR161         | 1,06 |
| calcium and integrin binding family member 3                                                                     | CIB3           | 1,06 |
| NADH dehydrogenase (ubiquinone) Fe-S protein 2, 49kDa (NADH-coenzyme Q reductase)                                | NDUFS2         | 1,06 |
| vacuolar protein sorting 13 homolog D (S. cerevisiae)                                                            | VPS13D         | 1,06 |
| ribosomal protein L7a                                                                                            | RPL7A          | 1,06 |
| tankyrase, TRF1-interacting ankyrin-related ADP-ribose polymerase 2                                              | TNKS2          | 1,06 |
| solute carrier family 22 (organic anion/urate transporter), member 12                                            | SLC22A12       | 1,06 |
| sonic hedgehog                                                                                                   | SHH            | 1,06 |
| transmembrane protease, serine 2                                                                                 | TMPRSS2        | 1,06 |
| olfactory receptor, family 2, subfamily T, member 35                                                             | OR2T35         | 1,06 |
| ring finger protein 222                                                                                          | RNF222         | 1,06 |
| UTP6, small subunit (SSU) processome component, homolog (yeast)                                                  | UTP6           | 1,06 |
| musculoskeletal, embryonic nuclear protein 1                                                                     | MUSTN1         | 1,06 |
| transglutaminase 4                                                                                               | TGM4           | 1,06 |
| golgi-associated, gamma adaptin ear containing, ARF binding protein 2                                            | GGA2           | 1,06 |
| chronic lymphocytic leukemia up-regulated 1                                                                      | CLLU1          | 1,06 |
| transcription factor AP-2 alpha (activating enhancer binding protein 2 alpha)                                    | TFAP2A         | 1,06 |
| von Willebrand factor A domain containing 5B1                                                                    | VWA5B1         | 1,06 |
| huntingtin interacting protein K                                                                                 | HYPK           | 1,06 |
| ceramide synthase 6                                                                                              | CERS6          | 1,06 |
| double homeobox 4 like 8                                                                                         | DUX4L8         | 1,06 |
| solute carrier family 17 (vesicular glutamate transporter), member 7                                             | SLC17A7        | 1,06 |
| paired-like homeodomain 2                                                                                        | PITX2          | 1,06 |

|                                                                                                                                                                                                                                                                                                                                                                                                                                                        |                             |      |
|--------------------------------------------------------------------------------------------------------------------------------------------------------------------------------------------------------------------------------------------------------------------------------------------------------------------------------------------------------------------------------------------------------------------------------------------------------|-----------------------------|------|
| t-complex 10-like 2                                                                                                                                                                                                                                                                                                                                                                                                                                    | TCP10L2                     | 1,06 |
| sema domain, seven thrombospondin repeats (type 1 and type 1-like), transmembrane domain (TM) and short cytoplasmic domain, (semaphorin) 5A                                                                                                                                                                                                                                                                                                            | SEMA5A                      | 1,06 |
| spermatogenesis associated 19                                                                                                                                                                                                                                                                                                                                                                                                                          | SPATA19                     | 1,06 |
| olfactory receptor, family 52, subfamily E, member 2                                                                                                                                                                                                                                                                                                                                                                                                   | OR52E2                      | 1,06 |
| solute carrier family 2 (facilitated glucose transporter), member 6 [Source:HGNC Symbol;Acc:HGNC:11011]                                                                                                                                                                                                                                                                                                                                                | SLC2A6                      | 1,06 |
| tubulin folding cofactor D                                                                                                                                                                                                                                                                                                                                                                                                                             | TBCD                        | 1,06 |
| chromosome 2 open reading frame 57                                                                                                                                                                                                                                                                                                                                                                                                                     | C2orf57                     | 1,06 |
| ATPase, H <sup>+</sup> transporting, lysosomal accessory protein 1-like                                                                                                                                                                                                                                                                                                                                                                                | ATP6AP1L                    | 1,06 |
| developmental pluripotency associated 3                                                                                                                                                                                                                                                                                                                                                                                                                | DPPA3                       | 1,06 |
| SPATA31 subfamily A, member 1                                                                                                                                                                                                                                                                                                                                                                                                                          | SPATA31A1                   | 1,06 |
| olfactory receptor, family 2, subfamily T, member 27                                                                                                                                                                                                                                                                                                                                                                                                   | OR2T27                      | 1,06 |
| family with sequence similarity 131, member B                                                                                                                                                                                                                                                                                                                                                                                                          | FAM131B                     | 1,06 |
| acetylserotonin O-methyltransferase; A kinase (PRKA) anchor protein 17A                                                                                                                                                                                                                                                                                                                                                                                | ASMT; AKAP17A               | 1,06 |
| Homo sapiens acetylserotonin O-methyltransferase (ASMT), transcript variant 1, mRNA.; Homo sapiens acetylserotonin O-methyltransferase (ASMT), transcript variant 3, mRNA.; acetylserotonin O-methyltransferase [Source:HGNC Symbol;Acc:HGNC:750]; Homo sapiens acetylserotonin O-methyltransferase, mRNA (cDNA clone MGC:2145 IMAGE:3356470), complete cds.; Transcript Identified by AceView, Entrez Gene ID(s) 438; 8227, RefSeq ID(s) NM_001171038 | ASMT;<br>SFRS17AandASM<br>T | 1,06 |
| potassium channel, sodium activated subfamily T, member 1                                                                                                                                                                                                                                                                                                                                                                                              | KCNT1                       | 1,06 |
| anaplastic lymphoma receptor tyrosine kinase                                                                                                                                                                                                                                                                                                                                                                                                           | ALK                         | 1,06 |
| Memczak2013 ALT_ACCEPTOR, ALT_DONOR, coding, INTERNAL, intronic best transcript NM_003036; Transcript Identified by AceView                                                                                                                                                                                                                                                                                                                            | SKI; kerlabu                | 1,06 |
| Fer3-like bHLH transcription factor                                                                                                                                                                                                                                                                                                                                                                                                                    | FERD3L                      | 1,06 |
| maestro heat-like repeat family member 2B                                                                                                                                                                                                                                                                                                                                                                                                              | MROH2B                      | 1,06 |
| family with sequence similarity 104, member B                                                                                                                                                                                                                                                                                                                                                                                                          | FAM104B                     | 1,06 |
| regulator of G-protein signaling 9                                                                                                                                                                                                                                                                                                                                                                                                                     | RGS9                        | 1,06 |
| collagen, type IX, alpha 2                                                                                                                                                                                                                                                                                                                                                                                                                             | COL9A2                      | 1,06 |
| defensin, alpha 6, Paneth cell-specific                                                                                                                                                                                                                                                                                                                                                                                                                | DEFA6                       | 1,06 |
| keratin associated protein 20-3                                                                                                                                                                                                                                                                                                                                                                                                                        | KRTAP20-3                   | 1,06 |
| olfactory receptor, family 5, subfamily D, member 18                                                                                                                                                                                                                                                                                                                                                                                                   | OR5D18                      | 1,06 |
| ring finger protein 165                                                                                                                                                                                                                                                                                                                                                                                                                                | RNF165                      | 1,06 |
| zinc finger protein 197                                                                                                                                                                                                                                                                                                                                                                                                                                | ZNF197                      | 1,06 |
| cholinergic receptor, muscarinic 2                                                                                                                                                                                                                                                                                                                                                                                                                     | CHRM2                       | 1,06 |
| family with sequence similarity 166, member B                                                                                                                                                                                                                                                                                                                                                                                                          | FAM166B                     | 1,06 |
| MORC family CW-type zinc finger 3                                                                                                                                                                                                                                                                                                                                                                                                                      | MORC3                       | 1,06 |

|                                                                                                               |                |      |
|---------------------------------------------------------------------------------------------------------------|----------------|------|
| leucine rich repeat containing 26                                                                             | LRRC26         | 1,06 |
| nitric oxide synthase 1 (neuronal) adaptor protein                                                            | NOS1AP         | 1,06 |
| sorting nexin 18                                                                                              | SNX18          | 1,06 |
| coiled-coil and C2 domain containing 2A                                                                       | CC2D2A         | 1,06 |
| TP73 antisense RNA 1                                                                                          | TP73-AS1       | 1,06 |
| mitogen-activated protein kinase 10                                                                           | MAPK10         | 1,06 |
| olfactory receptor, family 10, subfamily A, member 6<br>(gene/pseudogene)                                     | OR10A6         | 1,06 |
| olfactory receptor family 10 subfamily A member 6<br>(gene/pseudogene) [Source:HGNC<br>Symbol;Acc:HGNC:15132] | OR10A6         | 1,06 |
| acidic repeat containing                                                                                      | ACRC           | 1,06 |
| KN motif and ankyrin repeat domains 3                                                                         | KANK3          | 1,06 |
| ssu-2 homolog (C. elegans)                                                                                    | SSUH2          | 1,06 |
| Memczak2013 ALT_ACCEPTOR, ALT_DONOR, coding,<br>INTERNAL, intronic best transcript NM_001190457               | CORO2B         | 1,06 |
| spectrin repeat containing, nuclear envelope 2                                                                | SYNE2          | 1,06 |
| oculocutaneous albinism II                                                                                    | OCA2           | 1,06 |
| hedgehog acyltransferase                                                                                      | HHAT           | 1,06 |
| cerebellin 2 precursor                                                                                        | CBLN2          | 1,06 |
| oxidative stress responsive 1                                                                                 | OXS1           | 1,06 |
| family with sequence similarity 212, member B                                                                 | FAM212B        | 1,06 |
| cholinergic receptor, muscarinic 5                                                                            | CHRM5          | 1,06 |
| zinc finger protein 462                                                                                       | ZNF462         | 1,06 |
| BEN domain containing 2                                                                                       | BEND2          | 1,06 |
| LIM domain only 3 (rhombotin-like 2)                                                                          | LMO3           | 1,06 |
| family with sequence similarity 73, member B                                                                  | FAM73B         | 1,06 |
| mesoderm development candidate 1                                                                              | MESDC1         | 1,06 |
| PRAME family member 6 [Source:HGNC<br>Symbol;Acc:HGNC:30583]                                                  | PRAMEF6        | 1,06 |
| lens intrinsic membrane protein 2                                                                             | LIM2           | 1,06 |
| interleukin 12 receptor, beta 2                                                                               | IL12RB2        | 1,06 |
| homeobox B7                                                                                                   | HOXB7          | 1,06 |
| CREB regulated transcription coactivator 1                                                                    | CRTC1          | 1,06 |
| potassium channel, two pore domain subfamily K,<br>member 7                                                   | KCNK7          | 1,06 |
| enhancer of polycomb homolog 2 (Drosophila)                                                                   | EPC2           | 1,06 |
| coiled-coil domain containing 110                                                                             | CCDC110        | 1,06 |
| neuropeptide FF receptor 2                                                                                    | NPFFR2         | 1,06 |
| downstream neighbor of SON; crystallin zeta like 1                                                            | DONSON; CRYZL1 | 1,06 |
| testis expressed 29                                                                                           | TEX29          | 1,06 |
| keratin 32, type I                                                                                            | KRT32          | 1,06 |
| NIM1 serine/threonine protein kinase                                                                          | NIM1K          | 1,06 |
| opioid receptor, delta 1                                                                                      | OPRD1          | 1,06 |



|                                                                                                                                                                                                              |                     |      |
|--------------------------------------------------------------------------------------------------------------------------------------------------------------------------------------------------------------|---------------------|------|
| eukaryotic translation initiation factor 4E family member 3                                                                                                                                                  | EIF4E3              | 1,06 |
| cytokine receptor-like factor 2                                                                                                                                                                              | CRLF2               | 1,06 |
| coronin, actin binding protein, 1A                                                                                                                                                                           | CORO1A              | 1,06 |
| opsin 4                                                                                                                                                                                                      | OPN4                | 1,06 |
| NSE2/MMS21 homolog, SMC5-SMC6 complex SUMO ligase                                                                                                                                                            | NSMCE2              | 1,06 |
| melanoma associated antigen (mutated) 1                                                                                                                                                                      | MUM1                | 1,06 |
| Synthetic construct Homo sapiens clone IMAGE:100069019, MGC:199030 methyl-CpG binding domain protein 3-like 2 (MBD3L2) mRNA, encodes complete protein.; novel transcript                                     | MBD3L2; CTB-25J19.1 | 1,06 |
| eukaryotic translation initiation factor 3, subunit M                                                                                                                                                        | EIF3M               | 1,06 |
| glycoprotein Ib (platelet), beta polypeptide; septin 5                                                                                                                                                       | GP1BB; SEPT5        | 1,06 |
| Transcript Identified by AceView, Entrez Gene ID(s) 26147                                                                                                                                                    | PHF19               | 1,06 |
| chromosome 8 open reading frame 58                                                                                                                                                                           | C8orf58             | 1,06 |
| Homo sapiens olfactory receptor, family 4, subfamily M, member 2 (OR4M2), mRNA.; Homo sapiens olfactory receptor, family 4, subfamily M, member 2, mRNA (cDNA clone MGC:168600 IMAGE:9020977), complete cds. | OR4M2; AC171558.2   | 1,06 |
| nei-like DNA glycosylase 2                                                                                                                                                                                   | NEIL2               | 1,06 |
| olfactory receptor, family 5, subfamily C, member 1                                                                                                                                                          | OR5C1               | 1,06 |
| Transcript Identified by AceView, Entrez Gene ID(s) 116840                                                                                                                                                   | CNTROB              | 1,06 |
| family with sequence similarity 207, member A                                                                                                                                                                | FAM207A             | 1,06 |
| RasGEF domain family member 1C                                                                                                                                                                               | RASGEF1C            | 1,06 |
| Eukaryotic translation initiation factor 3 subunit F [Source:UniProtKB/Swiss-Prot;Acc:O00303]                                                                                                                | EIF3F               | 1,06 |
| transmembrane protein 2                                                                                                                                                                                      | TMEM2               | 1,06 |
| NK2 homeobox 5                                                                                                                                                                                               | NKX2-5              | 1,06 |
| solute carrier family 34 (type II sodium/phosphate cotransporter), member 2                                                                                                                                  | SLC34A2             | 1,06 |
| multiple EGF-like-domains 11                                                                                                                                                                                 | MEGF11              | 1,06 |
| WD repeat domain 60                                                                                                                                                                                          | WDR60               | 1,06 |
| neurexin 3                                                                                                                                                                                                   | NRXN3               | 1,06 |
| arachidonate 5-lipoxygenase                                                                                                                                                                                  | ALOX5               | 1,06 |
| microtubule associated serine/threonine kinase 1                                                                                                                                                             | MAST1               | 1,06 |
| endothelin 2                                                                                                                                                                                                 | EDN2                | 1,06 |
| long intergenic non-protein coding RNA 336                                                                                                                                                                   | LINC00336           | 1,06 |
| EPH receptor A10                                                                                                                                                                                             | EPHA10              | 1,06 |
| Memczak2013 ANTISENSE, CDS, coding, INTERNAL best transcript NM_033054                                                                                                                                       | MYO1G               | 1,06 |

|                                                                                                                                                                                                                                                                                                                                                                                                                                                                                                                                                                          |                                                            |      |
|--------------------------------------------------------------------------------------------------------------------------------------------------------------------------------------------------------------------------------------------------------------------------------------------------------------------------------------------------------------------------------------------------------------------------------------------------------------------------------------------------------------------------------------------------------------------------|------------------------------------------------------------|------|
| spla/ryanodine receptor domain and SOCS box containing 3                                                                                                                                                                                                                                                                                                                                                                                                                                                                                                                 | SPSB3                                                      | 1,06 |
| adhesion G protein-coupled receptor V1                                                                                                                                                                                                                                                                                                                                                                                                                                                                                                                                   | ADGRV1                                                     | 1,06 |
| methyltransferase like 24                                                                                                                                                                                                                                                                                                                                                                                                                                                                                                                                                | METTL24                                                    | 1,06 |
| SPATA31 subfamily C, member 2                                                                                                                                                                                                                                                                                                                                                                                                                                                                                                                                            | SPATA31C2                                                  | 1,06 |
| uncharacterized LOC100129924; Transcript Identified by AceView, Entrez Gene ID(s) 79078; novel transcript                                                                                                                                                                                                                                                                                                                                                                                                                                                                | LOC100129924; C1orf50; RP5-994D16.11                       | 1,06 |
| membrane-spanning 4-domains, subfamily A, member 4E                                                                                                                                                                                                                                                                                                                                                                                                                                                                                                                      | MS4A4E                                                     | 1,06 |
| cilia and flagella associated protein 53                                                                                                                                                                                                                                                                                                                                                                                                                                                                                                                                 | CFAP53                                                     | 1,06 |
| WD repeat domain 38                                                                                                                                                                                                                                                                                                                                                                                                                                                                                                                                                      | WDR38                                                      | 1,06 |
| adenosine A1 receptor                                                                                                                                                                                                                                                                                                                                                                                                                                                                                                                                                    | ADORA1                                                     | 1,06 |
| chymotrypsin-like elastase family, member 2A                                                                                                                                                                                                                                                                                                                                                                                                                                                                                                                             | CELA2A                                                     | 1,06 |
| uncharacterized serine/threonine-protein kinase SgK494; Synthetic construct Homo sapiens clone IMAGE:100064171, MGC:193254 uncharacterized serine/threonine-protein kinase SgK494 (FLJ25006) mRNA, encodes complete protein.; Salzman2013 ANNOTATED, CDS, coding, INTERNAL, OVCODE, OVERLAPTX, OVEXON best transcript NM_001174103; Transcript Identified by AceView, Entrez Gene ID(s) 124923; 9703; 645851; 10615; uncharacterized serine/threonine-protein kinase SgK494 [Source:EntrezGene;Acc:124923]; Uncharacterized protein [Source:UniProtKB/TrEMBL;Acc:J3KTE0] | SGK494; FLJ25006; KIAA0100andSGK494andSPAG5; RP11-192H23.4 | 1,06 |
| Homo sapiens uncharacterized LOC388692 (LOC388692), long non-coding RNA.; Homo sapiens family with sequence similarity 231, member D (FAM231D), long non-coding RNA.; novel transcript                                                                                                                                                                                                                                                                                                                                                                                   | LOC388692; FAM231D; RP11-403I13.7; RP11-403I13.8           | 1,06 |
| lipopolysaccharide binding protein                                                                                                                                                                                                                                                                                                                                                                                                                                                                                                                                       | LBP                                                        | 1,06 |
| ubiquitin conjugating enzyme E2D 2                                                                                                                                                                                                                                                                                                                                                                                                                                                                                                                                       | UBE2D2                                                     | 1,06 |
| collagen, type XXIII, alpha 1                                                                                                                                                                                                                                                                                                                                                                                                                                                                                                                                            | COL23A1                                                    | 1,06 |
| kinesin family member 7                                                                                                                                                                                                                                                                                                                                                                                                                                                                                                                                                  | KIF7                                                       | 1,06 |
| unc-80 homolog (C. elegans)                                                                                                                                                                                                                                                                                                                                                                                                                                                                                                                                              | UNC80                                                      | 1,06 |
| DEAD (Asp-Glu-Ala-Asp) box helicase 25                                                                                                                                                                                                                                                                                                                                                                                                                                                                                                                                   | DDX25                                                      | 1,06 |
| cystatin-like 1                                                                                                                                                                                                                                                                                                                                                                                                                                                                                                                                                          | CSTL1                                                      | 1,06 |
| protease, serine, 37                                                                                                                                                                                                                                                                                                                                                                                                                                                                                                                                                     | PRSS37                                                     | 1,06 |
| FERM domain containing 1                                                                                                                                                                                                                                                                                                                                                                                                                                                                                                                                                 | FRMD1                                                      | 1,06 |
| leucine rich repeat containing 10B                                                                                                                                                                                                                                                                                                                                                                                                                                                                                                                                       | LRRC10B                                                    | 1,06 |
| zinc finger protein, FOG family member 2                                                                                                                                                                                                                                                                                                                                                                                                                                                                                                                                 | ZFPM2                                                      | 1,06 |
| trichohyalin like 1                                                                                                                                                                                                                                                                                                                                                                                                                                                                                                                                                      | TCHHL1                                                     | 1,06 |
| ankyrin repeat and death domain containing 1B                                                                                                                                                                                                                                                                                                                                                                                                                                                                                                                            | ANKDD1B                                                    | 1,06 |
| protein phosphatase 4, catalytic subunit                                                                                                                                                                                                                                                                                                                                                                                                                                                                                                                                 | PPP4C                                                      | 1,06 |
| Fc receptor-like 3                                                                                                                                                                                                                                                                                                                                                                                                                                                                                                                                                       | FCRL3                                                      | 1,06 |
| DEAD (Asp-Glu-Ala-Asp) box polypeptide 53                                                                                                                                                                                                                                                                                                                                                                                                                                                                                                                                | DDX53                                                      | 1,06 |

|                                                                                                                            |                |      |
|----------------------------------------------------------------------------------------------------------------------------|----------------|------|
| olfactory receptor, family 5, subfamily H, member 15;<br>olfactory receptor, family 5, subfamily H, member 5<br>pseudogene | OR5H15; OR5H5P | 1,06 |
| forkhead box R2                                                                                                            | FOXR2          | 1,06 |
| hyaluronan synthase 2                                                                                                      | HAS2           | 1,06 |
| olfactory receptor, family 5, subfamily AR, member 1<br>(gene/pseudogene)                                                  | OR5AR1         | 1,06 |
| 3-oxoacid CoA-transferase 2 pseudogene 1                                                                                   | OXCT2P1        | 1,06 |
| septin 3                                                                                                                   | sept-03        | 1,06 |
| olfactory receptor, family 2, subfamily AG, member 2                                                                       | OR2AG2         | 1,06 |
| nucleoredoxin                                                                                                              | NXN            | 1,06 |
| neuropeptide B                                                                                                             | NPB            | 1,06 |
| transcription factor AP-2 gamma (activating enhancer<br>binding protein 2 gamma)                                           | TFAP2C         | 1,06 |
| tetratricopeptide repeat domain 36                                                                                         | TTC36          | 1,06 |
| G protein-coupled receptor 82                                                                                              | GPR82          | 1,06 |
| LysM, putative peptidoglycan-binding, domain containing<br>2                                                               | LYSMD2         | 1,06 |
| transmembrane and immunoglobulin domain containing<br>1                                                                    | TMIGD1         | 1,06 |
| TATA box binding protein associated factor 7 like                                                                          | TAF7L          | 1,06 |
| tubulin polyglutamylase complex subunit 1                                                                                  | TPGS1          | 1,06 |
| EPH receptor B1                                                                                                            | EPHB1          | 1,06 |
| polymerase (RNA) III (DNA directed) polypeptide K, 12.3<br>kDa                                                             | POLR3K         | 1,06 |
| Transcript Identified by AceView, Entrez Gene ID(s) 51105                                                                  | PHF20L1        | 1,06 |
| Jeck2013 ALT_ACCEPTOR, ALT_DONOR, coding,<br>INTERNAL, intronic best transcript NM_001014797                               | KCNMA1         | 1,06 |
| beta-1,3-glucuronyltransferase 2                                                                                           | B3GAT2         | 1,06 |
| acid sensing ion channel 2                                                                                                 | ASIC2          | 1,06 |
| hyaluronan and proteoglycan link protein 2                                                                                 | HAPLN2         | 1,06 |
| Memczak2013 ANTISENSE, CDS, coding, INTERNAL, UTR5<br>best transcript NM_001199573                                         | TRIM22         | 1,05 |
| P antigen family, member 2B                                                                                                | PAGE2B         | 1,05 |
| POU class 5 homeobox 1B                                                                                                    | POU5F1B        | 1,05 |
| TBC1 domain family, member 3C                                                                                              | TBC1D3C        | 1,05 |
| ankyrin repeat and death domain containing 1A                                                                              | ANKDD1A        | 1,05 |
| Jeck2013 ALT_ACCEPTOR, ALT_DONOR, coding,<br>INTERNAL, intronic best transcript NM_015589                                  | SAMD4A         | 1,05 |
| dynein, axonemal, intermediate chain 2                                                                                     | DNAI2          | 1,05 |
| Transcript Identified by AceView, Entrez Gene ID(s) 64405                                                                  | CDH22          | 1,05 |
| PPARGC1 and ESRR induced regulator, muscle 1                                                                               | PERM1          | 1,05 |
| ADP-ribosylation factor like GTPase 14 effector protein                                                                    | ARL14EP        | 1,05 |

|                                                                                              |          |      |
|----------------------------------------------------------------------------------------------|----------|------|
| SPANX family, member N2                                                                      | SPANXN2  | 1,05 |
| family with sequence similarity 104, member A                                                | FAM104A  | 1,05 |
| family with sequence similarity 57, member B                                                 | FAM57B   | 1,05 |
| transmembrane protein 183A                                                                   | TMEM183A | 1,05 |
| vitron                                                                                       | VIT      | 1,05 |
| H6 family homeobox 1                                                                         | HMX1     | 1,05 |
| RAB25, member RAS oncogene family                                                            | RAB25    | 1,05 |
| interleukin 17B                                                                              | IL17B    | 1,05 |
| trichoplein, keratin filament binding                                                        | TCHP     | 1,05 |
| olfactory receptor, family 5, subfamily M, member 11                                         | OR5M11   | 1,05 |
| MOB family member 4, phocein                                                                 | MOB4     | 1,05 |
| Zhang2013 ALT_DONOR, coding, INTERNAL, intronic, OVERLAPTX, OVEXON best transcript NM_016648 | LARP7    | 1,05 |
| rhophilin associated tail protein 1-like                                                     | ROPN1L   | 1,05 |
| small ArfGAP 1                                                                               | SMAP1    | 1,05 |
| synaptonemal complex protein 1                                                               | SYCP1    | 1,05 |
| erythrocyte membrane protein band 4.2                                                        | EPB42    | 1,05 |
| mediator complex subunit 21                                                                  | MED21    | 1,05 |
| cyclin and CBS domain divalent metal cation transport mediator 4                             | CNNM4    | 1,05 |
| TP53RK binding protein                                                                       | TPRKB    | 1,05 |
| hyaluronan synthase 3                                                                        | HAS3     | 1,05 |
| roundabout guidance receptor 3                                                               | ROBO3    | 1,05 |
| CUE domain containing 2                                                                      | CUEDC2   | 1,05 |
| zinc finger, DHHC-type containing 8                                                          | ZDHHC8   | 1,05 |
| zinc finger, MYND-type containing 11                                                         | ZMYND11  | 1,05 |
| cyclin G2                                                                                    | CCNG2    | 1,05 |
| coiled-coil domain containing 62                                                             | CCDC62   | 1,05 |
| surfeit 6                                                                                    | SURF6    | 1,05 |
| PRAME family member 18                                                                       | PRAMEF18 | 1,05 |
| zinc finger protein 329                                                                      | ZNF329   | 1,05 |
| signal recognition particle receptor (docking protein)                                       | SRPR     | 1,05 |
| coiled-coil domain containing 120                                                            | CCDC120  | 1,05 |
| chemerin chemokine-like receptor 1                                                           | CMKLR1   | 1,05 |
| T-box 20                                                                                     | TBX20    | 1,05 |
| NADH dehydrogenase (ubiquinone) complex I, assembly factor 6                                 | NDUFAF6  | 1,05 |
| major facilitator superfamily domain containing 12                                           | MFSD12   | 1,05 |
| calpain 10                                                                                   | CAPN10   | 1,05 |
| CDC42 effector protein (Rho GTPase binding) 5                                                | CDC42EP5 | 1,05 |
| HKR1, GLI-Kruppel zinc finger family member                                                  | HKR1     | 1,05 |
| arginine/serine-rich coiled-coil 2                                                           | RSRC2    | 1,05 |
| zinc finger protein 98                                                                       | ZNF98    | 1,05 |
| retinol binding protein 3, interstitial                                                      | RBP3     | 1,05 |
| chromosome 17 open reading frame 77                                                          | C17orf77 | 1,05 |

|                                                                                                                                    |                                   |      |
|------------------------------------------------------------------------------------------------------------------------------------|-----------------------------------|------|
| chromosome 7 open reading frame 33                                                                                                 | C7orf33                           | 1,05 |
| POU class 3 homeobox 1                                                                                                             | POU3F1                            | 1,05 |
| chromosome 15 open reading frame 39                                                                                                | C15orf39                          | 1,05 |
| proteasome subunit alpha 7                                                                                                         | PSMA7                             | 1,05 |
| Rhox homeobox family, member 1                                                                                                     | RHOXF1                            | 1,05 |
| coiled-coil domain containing 88C                                                                                                  | CCDC88C                           | 1,05 |
| ribosomal protein L28; microRNA 6805                                                                                               | RPL28; MIR6805                    | 1,05 |
| glutamate receptor, ionotropic, delta 2                                                                                            | GRID2                             | 1,05 |
| olfactory receptor, family 14, subfamily C, member 36                                                                              | OR14C36                           | 1,05 |
| interferon regulatory factor 7                                                                                                     | IRF7                              | 1,05 |
| C-type lectin domain family 2, member L                                                                                            | CLEC2L                            | 1,05 |
| zinc finger protein 674                                                                                                            | ZNF674                            | 1,05 |
| cytochrome c oxidase assembly factor 6                                                                                             | COA6                              | 1,05 |
| putative deoxyuridine 5-triphosphate nucleotidohydrolase-like protein FLJ16323; novel transcript; Transcript Identified by AceView | LOC100506422; RP11-80I3.1; tayamu | 1,05 |
| myelin transcription factor 1-like                                                                                                 | MYT1L                             | 1,05 |
| potassium channel, inwardly rectifying subfamily J, member 1                                                                       | KCNJ1                             | 1,05 |
| peroxisomal biogenesis factor 2                                                                                                    | PEX2                              | 1,05 |
| general transcription factor IIIC subunit 4                                                                                        | GTF3C4                            | 1,05 |
| T-cell immunoglobulin and mucin domain containing 4                                                                                | TIMD4                             | 1,05 |
| ubiquitin conjugating enzyme E2G 1                                                                                                 | UBE2G1                            | 1,05 |
| DnaJ (Hsp40) homolog, subfamily B, member 7                                                                                        | DNAJB7                            | 1,05 |
| zinc finger protein 17                                                                                                             | ZNF17                             | 1,05 |
| potassium channel, subfamily U, member 1                                                                                           | KCNU1                             | 1,05 |
| cartilage intermediate layer protein, nucleotide pyrophosphohydrolase                                                              | CILP                              | 1,05 |
| glypican 5                                                                                                                         | GPC5                              | 1,05 |
| zinc finger protein 268                                                                                                            | ZNF268                            | 1,05 |
| cysteine-rich PDZ-binding protein                                                                                                  | CRIP1                             | 1,05 |
| KIAA0930                                                                                                                           | KIAA0930                          | 1,05 |
| ring finger protein 7                                                                                                              | RNF7                              | 1,05 |
| Src homology 2 domain containing transforming protein D                                                                            | SHD                               | 1,05 |
| replication protein A4                                                                                                             | RPA4                              | 1,05 |
| olfactory receptor, family 51, subfamily L, member 1                                                                               | OR51L1                            | 1,05 |
| fibronectin leucine rich transmembrane protein 1                                                                                   | FLRT1                             | 1,05 |
| prokineticin 2                                                                                                                     | PROK2                             | 1,05 |
| olfactory receptor, family 7, subfamily G, member 3                                                                                | OR7G3                             | 1,05 |
| Transcript Identified by AceView, Entrez Gene ID(s) 287                                                                            | ANK2                              | 1,05 |
| ADAMTSL4 antisense RNA 1                                                                                                           | ADAMTSL4-AS1                      | 1,05 |
| interferon, gamma                                                                                                                  | IFNG                              | 1,05 |
| interferon, alpha 8                                                                                                                | IFNA8                             | 1,05 |
| patatin-like phospholipase domain containing 5                                                                                     | PNPLA5                            | 1,05 |

|                                                                                                    |                          |      |
|----------------------------------------------------------------------------------------------------|--------------------------|------|
| uncharacterized LOC400661; novel transcript                                                        | LOC400661;<br>AC034110.1 | 1,05 |
| myocilin, trabecular meshwork inducible glucocorticoid response                                    | MYOC                     | 1,05 |
| doublecortin domain containing 1                                                                   | DCDC1                    | 1,05 |
| interleukin 36 receptor antagonist                                                                 | IL36RN                   | 1,05 |
| F-box and leucine-rich repeat protein 3                                                            | FBXL3                    | 1,05 |
| zinc finger protein 311                                                                            | ZNF311                   | 1,05 |
| P antigen family, member 5 (prostate associated)                                                   | PAGE5                    | 1,05 |
| enolase-phosphatase 1                                                                              | ENOPH1                   | 1,05 |
| protein associated with topoisomerase II homolog 2 (yeast)                                         | PATL2                    | 1,05 |
| TBC1 domain family, member 3                                                                       | TBC1D3                   | 1,05 |
| coatamer protein complex subunit zeta 1                                                            | COPZ1                    | 1,05 |
| Rho-associated, coiled-coil containing protein kinase 1                                            | ROCK1                    | 1,05 |
| family with sequence similarity 19 (chemokine (C-C motif)-like), member A3                         | FAM19A3                  | 1,05 |
| bladder cancer associated protein                                                                  | BLCAP                    | 1,05 |
| solute carrier family 30 (zinc transporter), member 4                                              | SLC30A4                  | 1,05 |
| chromosome 1 open reading frame 35                                                                 | C1orf35                  | 1,05 |
| adaptor-related protein complex 2, alpha 2 subunit                                                 | AP2A2                    | 1,05 |
| RAS guanyl releasing protein 2 (calcium and DAG-regulated)                                         | RASGRP2                  | 1,05 |
| oligosaccharyltransferase complex subunit 4 (non-catalytic)                                        | OST4                     | 1,05 |
| leukocyte immunoglobulin-like receptor, subfamily B (with TM and ITIM domains), member 2           | LILRB2                   | 1,05 |
| KIAA1211                                                                                           | KIAA1211                 | 1,05 |
| dopamine receptor D2                                                                               | DRD2                     | 1,05 |
| polymerase (RNA) II (DNA directed) polypeptide B, 140kDa                                           | POLR2B                   | 1,05 |
| Zhang2013 ALT_ACCEPTOR, ALT_DONOR, coding, INTERNAL, intronic, OVERLAPTX best transcript NM_017550 | MIER2                    | 1,05 |
| nuclear protein 2, transcriptional regulator                                                       | NUPR2                    | 1,05 |
| EYA transcriptional coactivator and phosphatase 1                                                  | EYA1                     | 1,05 |
| ATH1, acid trehalase-like 1 (yeast)                                                                | ATHL1                    | 1,05 |
| cytochrome P450, family 2, subfamily C, polypeptide 18                                             | CYP2C18                  | 1,05 |
| KH and NYN domain containing                                                                       | KHNYN                    | 1,05 |
| FtsJ RNA methyltransferase homolog 2 (E. coli)                                                     | FTSJ2                    | 1,05 |
| Salzman2013 ALT_ACCEPTOR, ALT_DONOR, coding, INTERNAL, intronic best transcript NM_012215          | MGEA5                    | 1,05 |
| outer dense fiber of sperm tails 3-like 2                                                          | ODF3L2                   | 1,05 |
| androgen-induced 1                                                                                 | AIG1                     | 1,05 |
| zinc finger protein 649                                                                            | ZNF649                   | 1,05 |

|                                                                                                     |                                           |      |
|-----------------------------------------------------------------------------------------------------|-------------------------------------------|------|
| general transcription factor IIH subunit 2                                                          | GTF2H2                                    | 1,05 |
|                                                                                                     | LRIG1                                     | 1,05 |
| cell division cycle 27                                                                              | CDC27                                     | 1,05 |
| HEN1 methyltransferase homolog 1 (Arabidopsis)                                                      | HENMT1                                    | 1,05 |
| solute carrier family 17 (vesicular glutamate transporter), member 6                                | SLC17A6                                   | 1,05 |
| ARL2-SNX15 readthrough (NMD candidate)                                                              | ARL2-SNX15                                | 1,05 |
| ankyrin repeat domain 6                                                                             | ANKRD6                                    | 1,05 |
| zinc finger protein 502                                                                             | ZNF502                                    | 1,05 |
| chromosome 10 open reading frame 71                                                                 | C10orf71                                  | 1,05 |
| DEAH (Asp-Glu-Ala-His) box polypeptide 16                                                           | DHX16                                     | 1,05 |
| zinc finger protein 285                                                                             | ZNF285                                    | 1,05 |
| A kinase (PRKA) anchor protein 3                                                                    | AKAP3                                     | 1,05 |
| granulysin                                                                                          | GNLY                                      | 1,05 |
| guanine nucleotide binding protein (G protein), alpha inhibiting activity polypeptide 3             | GNAI3                                     | 1,05 |
| oculocerebrorenal syndrome of Lowe                                                                  | OCRL                                      | 1,05 |
| chromosome 4 open reading frame 48                                                                  | C4orf48                                   | 1,05 |
| alanyl-tRNA synthetase                                                                              | AARS                                      | 1,05 |
| TAF9B RNA polymerase II, TATA box binding protein (TBP)-associated factor, 31kDa                    | TAF9B                                     | 1,05 |
| CD53 molecule                                                                                       | CD53                                      | 1,05 |
| ELMO/CED-12 domain containing 1                                                                     | ELMOD1                                    | 1,05 |
| uncharacterized LOC102467081; novel transcript, antisense to GZMK; Transcript Identified by AceView | LOC102467081;<br>CTD-2313F11.1;<br>slygee | 1,05 |
| mitogen-activated protein kinase 4                                                                  | MAPK4                                     | 1,05 |
| G protein-coupled receptor associated sorting protein 2                                             | GPRASP2                                   | 1,05 |
| hephaestin                                                                                          | HEPH                                      | 1,05 |
| chromosome 2 open reading frame 73                                                                  | C2orf73                                   | 1,05 |
| coiled-coil domain containing 3                                                                     | CCDC3                                     | 1,05 |
| family with sequence similarity 105, member A                                                       | FAM105A                                   | 1,05 |
| coiled-coil domain containing 168                                                                   | CCDC168                                   | 1,05 |
| stereocilin                                                                                         | STRC                                      | 1,05 |
| T-cell leukemia homeobox 3                                                                          | TLX3                                      | 1,05 |
| NME/NM23 family member 9                                                                            | NME9                                      | 1,05 |
| Scm-like with four mbt domains 2                                                                    | SFMBT2                                    | 1,05 |
| mitochondrial ribosomal protein S25                                                                 | MRPS25                                    | 1,05 |
| protein kinase C, epsilon                                                                           | PRKCE                                     | 1,05 |
| Transcript Identified by AceView, Entrez Gene ID(s) 219333                                          | USP12                                     | 1,05 |
| natural cytotoxicity triggering receptor 2                                                          | NCR2                                      | 1,05 |
| transforming growth factor beta regulator 1                                                         | TBRG1                                     | 1,05 |
| tetratricopeptide repeat domain 31                                                                  | TTC31                                     | 1,05 |
| zinc finger, DHHC-type containing 13                                                                | ZDHHC13                                   | 1,05 |

|                                                                                                   |                             |      |
|---------------------------------------------------------------------------------------------------|-----------------------------|------|
| neurotrophin 3                                                                                    | NTF3                        | 1,05 |
| acyl-CoA thioesterase 4                                                                           | ACOT4                       | 1,05 |
| Transcript Identified by AceView, Entrez Gene ID(s) 51056                                         | LAP3                        | 1,05 |
| galactosidase beta 1 like 3                                                                       | GLB1L3                      | 1,05 |
| SLIT and NTRK-like family, member 2                                                               | SLITRK2                     | 1,05 |
| long intergenic non-protein coding RNA 471                                                        | LINC00471                   | 1,05 |
| ST6 beta-galactosamide alpha-2,6-sialyltransferase 2                                              | ST6GAL2                     | 1,05 |
| protocadherin beta 11                                                                             | PCDHB11                     | 1,05 |
| olfactory receptor, family 4, subfamily M, member 1                                               | OR4M1                       | 1,05 |
| fem-1 homolog c (C. elegans)                                                                      | FEM1C                       | 1,05 |
| pleiomorphic adenoma gene-like 1; hydatidiform mole associated and imprinted (non-protein coding) | PLAGL1; HYMAI               | 1,05 |
| synapsin II                                                                                       | SYN2                        | 1,05 |
| variable charge, X-linked 2                                                                       | VCX2                        | 1,05 |
| phosphodiesterase 1C, calmodulin-dependent 70kDa                                                  | PDE1C                       | 1,05 |
| claudin 7                                                                                         | CLDN7                       | 1,05 |
| myosin, light chain 3, alkali; ventricular, skeletal, slow                                        | MYL3                        | 1,05 |
| vaccinia related kinase 1                                                                         | VRK1                        | 1,05 |
| lipid droplet associated hydrolase                                                                | LDAH                        | 1,05 |
| ADP-ribosylation factor like GTPase 6                                                             | ARL6                        | 1,05 |
| solute carrier organic anion transporter family, member 2B1                                       | SLCO2B1                     | 1,05 |
| olfactory receptor, family 5, subfamily M, member 8                                               | OR5M8                       | 1,05 |
| phosphatidylinositol-4,5-bisphosphate 3-kinase, catalytic subunit beta                            | PIK3CB                      | 1,05 |
| Memczak2013 ALT_ACCEPTOR, ALT_DONOR, coding, INTERNAL, intronic best transcript NM_001076787      | TP53I11                     | 1,05 |
| peptidylprolyl isomerase E (cyclophilin E)                                                        | PPIE                        | 1,05 |
| FAT atypical cadherin 2                                                                           | FAT2                        | 1,05 |
| actin, beta                                                                                       | ACTB                        | 1,05 |
| cysteine and glycine-rich protein 1                                                               | CSRP1                       | 1,05 |
| KIAA1143 [Source:HGNC Symbol;Acc:HGNC:29198]                                                      | KIAA1143                    | 1,05 |
| chromodomain helicase DNA binding protein 3                                                       | CHD3                        | 1,05 |
| cholinergic receptor, nicotinic alpha 5                                                           | CHRNA5                      | 1,05 |
| olfactory receptor, family 52, subfamily B, member 6                                              | OR52B6                      | 1,05 |
| calcyphosine                                                                                      | CAPS                        | 1,05 |
| P antigen family, member 2 (prostate associated)                                                  | PAGE2                       | 1,05 |
| testis-specific serine kinase 1B                                                                  | TSSK1B                      | 1,05 |
| TBC1D3P1-DHX40P1 readthrough transcribed pseudogene                                               | TBC1D3P1-DHX40P1            | 1,05 |
| Rho guanine nucleotide exchange factor 15                                                         | ARHGEF15                    | 1,05 |
| uncharacterized LOC101928327; novel transcript                                                    | LOC101928327;<br>AC007557.1 | 1,05 |
| relaxin 2                                                                                         | RLN2                        | 1,05 |



|                                                                                                                                |                       |      |
|--------------------------------------------------------------------------------------------------------------------------------|-----------------------|------|
| olfactory receptor, family 3, subfamily A, member 4 pseudogene; olfactory receptor, family 3, subfamily A, member 5 pseudogene | OR3A4P; OR3A5P        | 1,05 |
| HEPACAM family member 2                                                                                                        | HEPACAM2              | 1,05 |
| zinc finger protein 705G                                                                                                       | ZNF705G               | 1,05 |
| tetratricopeptide repeat domain 29                                                                                             | TTC29                 | 1,05 |
| coiled-coil domain containing 85A                                                                                              | CCDC85A               | 1,05 |
| distal-less homeobox 6                                                                                                         | DLX6                  | 1,05 |
| tRNA methyltransferase 44 homolog ( <i>S. cerevisiae</i> )                                                                     | TRMT44                | 1,05 |
| mitochondrial ribosomal protein L32                                                                                            | MRPL32                | 1,05 |
| intraflagellar transport 43                                                                                                    | IFT43                 | 1,05 |
| ADP-ribosylation factor like GTPase 5B                                                                                         | ARL5B                 | 1,05 |
| forkhead box D3                                                                                                                | FOXD3                 | 1,05 |
| phosphodiesterase 6D, cGMP-specific, rod, delta                                                                                | PDE6D                 | 1,05 |
| chromosome 12 open reading frame 65                                                                                            | C12orf65              | 1,05 |
| adhesion G protein-coupled receptor F2                                                                                         | ADGRF2                | 1,05 |
| myocyte enhancer factor 2A                                                                                                     | MEF2A                 | 1,05 |
| colipase, pancreatic                                                                                                           | CLPS                  | 1,05 |
| coiled-coil domain containing 83                                                                                               | CCDC83                | 1,05 |
| pterin-4 alpha-carbinolamine dehydratase/dimerization cofactor of hepatocyte nuclear factor 1 alpha                            | PCBD1                 | 1,05 |
| calcium channel, voltage-dependent, L type, alpha 1S subunit                                                                   | CACNA1S               | 1,05 |
| ERBB receptor feedback inhibitor 1                                                                                             | ERRFI1                | 1,05 |
| multiciliate differentiation and DNA synthesis associated cell cycle protein                                                   | MCIDAS                | 1,05 |
| pleckstrin homology domain containing, family G (with RhoGef domain) member 1                                                  | PLEKHG1               | 1,05 |
| tripartite motif containing 49D1; tripartite motif containing 49D2                                                             | TRIM49D1;<br>TRIM49D2 | 1,05 |
| keratin associated protein 5-6                                                                                                 | KRTAP5-6              | 1,05 |
| apolipoprotein B mRNA editing enzyme, catalytic polypeptide 1                                                                  | APOBEC1               | 1,05 |
| STARD3 N-terminal like                                                                                                         | STARD3NL              | 1,05 |
| NADH dehydrogenase (ubiquinone) 1 alpha subcomplex, 6, 14kDa                                                                   | NDUFA6                | 1,05 |
| charged multivesicular body protein 6                                                                                          | CHMP6                 | 1,05 |
| migration and invasion inhibitory protein                                                                                      | MIIP                  | 1,05 |
| MAS-related GPR, member D                                                                                                      | MRGPRD                | 1,05 |
| coiled-coil domain containing 188                                                                                              | CCDC188               | 1,05 |
| protein kinase C and casein kinase substrate in neurons 2                                                                      | PACSIN2               | 1,05 |
| centriolin                                                                                                                     | CNTRL                 | 1,05 |
| sperm associated antigen 11A; sperm associated antigen 11B                                                                     | SPAG11A;<br>SPAG11B   | 1,05 |

|                                                                                                                                                    |                |      |
|----------------------------------------------------------------------------------------------------------------------------------------------------|----------------|------|
| zinc finger protein 202                                                                                                                            | ZNF202         | 1,05 |
| ATM interactor                                                                                                                                     | ATMIN          | 1,05 |
| lipoma HMGIC fusion partner-like 1                                                                                                                 | LHFPL1         | 1,05 |
| cyclin-dependent kinase 5                                                                                                                          | CDK5           | 1,05 |
| SPATA31 subfamily E, member 1                                                                                                                      | SPATA31E1      | 1,05 |
| olfactory receptor, family 6, subfamily S, member 1                                                                                                | OR6S1          | 1,05 |
| trafficking protein particle complex 11                                                                                                            | TRAPPC11       | 1,05 |
| cytochrome c oxidase assembly homolog 15 (yeast)                                                                                                   | COX15          | 1,05 |
| protein phosphatase 2, regulatory subunit B, beta                                                                                                  | PPP2R5B        | 1,05 |
| zinc finger protein 668                                                                                                                            | ZNF668         | 1,05 |
| CD300e molecule                                                                                                                                    | CD300E         | 1,05 |
| tumor suppressor candidate 5                                                                                                                       | TUSC5          | 1,05 |
| neuronal differentiation 1                                                                                                                         | NEUROD1        | 1,05 |
| aldehyde dehydrogenase 1 family, member A2                                                                                                         | ALDH1A2        | 1,05 |
| phosphodiesterase 8B                                                                                                                               | PDE8B          | 1,05 |
| cytochrome P450, family 4, subfamily B, polypeptide 1                                                                                              | CYP4B1         | 1,05 |
| cylicin, basic protein of sperm head cytoskeleton 1                                                                                                | CYLC1          | 1,05 |
| DEAD/H (Asp-Glu-Ala-Asp/His) box polypeptide 26B                                                                                                   | DDX26B         | 1,05 |
| autophagy related 16-like 1                                                                                                                        | ATG16L1        | 1,05 |
| wingless-type MMTV integration site family, member 16                                                                                              | WNT16          | 1,05 |
| biogenesis of lysosomal organelles complex-1, subunit 6, pallidin                                                                                  | BLOC1S6        | 1,05 |
| ubiquitin-conjugating enzyme E2F (putative)                                                                                                        | UBE2F          | 1,05 |
| protein tyrosine phosphatase, non-receptor type 9                                                                                                  | PTPN9          | 1,05 |
| angiopoietin 4                                                                                                                                     | ANGPT4         | 1,05 |
| H6 family homeobox 3                                                                                                                               | HMX3           | 1,05 |
| ring finger protein, transmembrane 1                                                                                                               | RNFT1          | 1,05 |
| olfactory receptor, family 4, subfamily D, member 5                                                                                                | OR4D5          | 1,05 |
| chromosome 2 open reading frame 40                                                                                                                 | C2orf40        | 1,05 |
| solute carrier family 38, member 8                                                                                                                 | SLC38A8        | 1,05 |
| tubulin polymerization promoting protein                                                                                                           | TPPP           | 1,05 |
| myosin regulatory light chain interacting protein;<br>microRNA 4639                                                                                | MYLIP; MIR4639 | 1,05 |
| guanine nucleotide binding protein (G protein), alpha<br>transducing activity polypeptide 1                                                        | GNAT1          | 1,05 |
| Homo sapiens golgin A6 family-like 4 (GOLGA6L4),<br>mRNA.; golgin A6 family-like 4; golgin A6 family-like 4<br>[Source:HGNC Symbol;Acc:HGNC:27256] | GOLGA6L4       | 1,05 |
| Down syndrome cell adhesion molecule                                                                                                               | DSCAM          | 1,05 |
| ATP binding cassette subfamily G member 1                                                                                                          | ABCG1          | 1,05 |
| homeobox B5                                                                                                                                        | HOXB5          | 1,05 |
| reticulocalbin 1, EF-hand calcium binding domain                                                                                                   | RCN1           | 1,05 |
| adenomatosis polyposis coli 2                                                                                                                      | APC2           | 1,05 |
| placenta specific 9                                                                                                                                | PLAC9          | 1,05 |

|                                                                                                         |                              |      |
|---------------------------------------------------------------------------------------------------------|------------------------------|------|
| sialic acid binding Ig-like lectin 16 (gene/pseudogene)                                                 | SIGLEC16                     | 1,05 |
| chromosome 16 open reading frame 71                                                                     | C16orf71                     | 1,05 |
| retinol binding protein 7, cellular                                                                     | RBP7                         | 1,05 |
| PPAN-P2RY11 readthrough; purinergic receptor P2Y, G-protein coupled, 11; peter pan homolog (Drosophila) | PPAN-P2RY11;<br>P2RY11; PPAN | 1,05 |
| immunoglobulin mu binding protein 2                                                                     | IGHMBP2                      | 1,05 |
| creatine kinase, muscle                                                                                 | CKM                          | 1,05 |
| neuropeptide W                                                                                          | NPW                          | 1,05 |
| aldo-keto reductase family 1, member C8, pseudogene                                                     | AKR1C8P                      | 1,05 |
| Memczak2013 ALT_ACCEPTOR, ALT_DONOR, coding, INTERNAL, intronic best transcript NM_022720               | DGCR8                        | 1,05 |
| ribosomal protein S4, Y-linked 2                                                                        | RPS4Y2                       | 1,05 |
| cytochrome c oxidase assembly factor 7 (putative)                                                       | COA7                         | 1,05 |
| translocase of inner mitochondrial membrane 23 homolog B (yeast)                                        | TIMM23B                      | 1,05 |
| wingless-type MMTV integration site family, member 2B                                                   | WNT2B                        | 1,05 |
| prohibitin                                                                                              | PHB                          | 1,05 |
| La ribonucleoprotein domain family, member 4                                                            | LARP4                        | 1,05 |
| Rap guanine nucleotide exchange factor 3                                                                | RAPGEF3                      | 1,05 |
| olfactory receptor, family 8, subfamily J, member 1                                                     | OR8J1                        | 1,04 |
| chromosome 22 open reading frame 15                                                                     | C22orf15                     | 1,04 |
| transmembrane protein 222                                                                               | TMEM222                      | 1,04 |
| urocanate hydratase 1                                                                                   | UROC1                        | 1,04 |
| Memczak2013 ALT_ACCEPTOR, ALT_DONOR, coding, INTERNAL, intronic best transcript NM_001142393            | NEDD9                        | 1,04 |
| jumonji, AT rich interactive domain 2                                                                   | JARID2                       | 1,04 |
| Memczak2013 ALT_ACCEPTOR, ALT_DONOR, coding, INTERNAL, intronic best transcript NM_000655               | SELL                         | 1,04 |
| Olfactory receptor 4N4 [Source:UniProtKB/Swiss-Prot;Acc:Q8N0Y3]                                         | AC171558.1                   | 1,04 |
| defensin, beta 119                                                                                      | DEFB119                      | 1,04 |
| signal transducer and activator of transcription 5A                                                     | STAT5A                       | 1,04 |
| platelet-activating factor acetylhydrolase 1b, catalytic subunit 3 (29kDa)                              | PAFAH1B3                     | 1,04 |
| chromosome 1 open reading frame 64                                                                      | C1orf64                      | 1,04 |
| DENN/MADD domain containing 4B                                                                          | DENND4B                      | 1,04 |
| armadillo repeat containing 4                                                                           | ARMC4                        | 1,04 |
| ring finger protein 168, E3 ubiquitin protein ligase                                                    | RNF168                       | 1,04 |
| hedgehog acyltransferase                                                                                | HHAT                         | 1,04 |
| N-sulfoglucosamine sulfohydrolase                                                                       | SGSH                         | 1,04 |
| ZNF252P antisense RNA 1                                                                                 | ZNF252P-AS1                  | 1,04 |
| adaptor-related protein complex 1, gamma 2 subunit                                                      | AP1G2                        | 1,04 |
| lysophosphatidic acid receptor 1                                                                        | LPAR1                        | 1,04 |
| NLR family, pyrin domain containing 12                                                                  | NLRP12                       | 1,04 |

|                                                                                                                   |                               |      |
|-------------------------------------------------------------------------------------------------------------------|-------------------------------|------|
| nuclear receptor subfamily 0, group B, member 1                                                                   | NR0B1                         | 1,04 |
| centrosomal protein 72kDa                                                                                         | CEP72                         | 1,04 |
| olfactory receptor, family 5, subfamily W, member 2                                                               | OR5W2                         | 1,04 |
| gastrin-releasing peptide                                                                                         | GRP                           | 1,04 |
| chromosome 6 open reading frame 15                                                                                | C6orf15                       | 1,04 |
| APITD1-CORT readthrough; cortistatin; apoptosis-inducing, TAF9-like domain 1                                      | APITD1-CORT; CORT; APITD1     | 1,04 |
| chromosome 16 open reading frame 86                                                                               | C16orf86                      | 1,04 |
| thymidine phosphorylase; SCO2 cytochrome c oxidase assembly protein                                               | TYMP; SCO2                    | 1,04 |
| chromosome 7 open reading frame 66                                                                                | C7orf66                       | 1,04 |
| potassium channel, two pore domain subfamily K, member 18                                                         | KCNK18                        | 1,04 |
| Transcript Identified by AceView, Entrez Gene ID(s) 50515                                                         | CHST11                        | 1,04 |
| transglutaminase 4                                                                                                | TGM4                          | 1,04 |
| SPANX family, member N3                                                                                           | SPANXN3                       | 1,04 |
| CSAG family, member 3                                                                                             | CSAG3                         | 1,04 |
| endothelin converting enzyme 2                                                                                    | ECE2                          | 1,04 |
| Transcript Identified by AceView, Entrez Gene ID(s) 51074                                                         | APIP                          | 1,04 |
| defensin, beta 103A; defensin, beta 103B                                                                          | DEFB103A; DEFB103B            | 1,04 |
| fermitin family member 3                                                                                          | FERMT3                        | 1,04 |
| Transcript Identified by AceView, Entrez Gene ID(s) 131034                                                        | CPNE4                         | 1,04 |
| guanine nucleotide binding protein (G protein), gamma 10                                                          | GNG10                         | 1,04 |
| fer-1-like family member 5                                                                                        | FER1L5                        | 1,04 |
| protein phosphatase 2, regulatory subunit B, gamma                                                                | PPP2R2C                       | 1,04 |
| EF-hand calcium binding domain 8                                                                                  | EFCAB8                        | 1,04 |
| cleavage and polyadenylation specific factor 3-like; microRNA 6727                                                | CPSF3L; MIR6727               | 1,04 |
| RAB4B, member RAS oncogene family; MIA-RAB4B readthrough (NMD candidate); RAB4B-EGLN2 readthrough (NMD candidate) | RAB4B; MIA-RAB4B; RAB4B-EGLN2 | 1,04 |
| olfactory receptor, family 1, subfamily A, member 1                                                               | OR1A1                         | 1,04 |
| AT rich interactive domain 3C (BRIGHT-like)                                                                       | ARID3C                        | 1,04 |
| CASK interacting protein 2                                                                                        | CASKIN2                       | 1,04 |
| adenylate cyclase 9                                                                                               | ADCY9                         | 1,04 |
| glycine-N-acyltransferase                                                                                         | GLYAT                         | 1,04 |
| aspartate dehydrogenase domain containing                                                                         | ASPDH                         | 1,04 |
| ankyrin repeat domain 60                                                                                          | ANKRD60                       | 1,04 |
| cytoplasmic linker associated protein 2                                                                           | CLASP2                        | 1,04 |
| clathrin, heavy chain (Hc)                                                                                        | CLTC                          | 1,04 |

|                                                                                                           |                               |      |
|-----------------------------------------------------------------------------------------------------------|-------------------------------|------|
| olfactory receptor, family 2, subfamily V, member 2                                                       | OR2V2                         | 1,04 |
| ceramide kinase like                                                                                      | CERKL                         | 1,04 |
| purinergic receptor P2X, ligand gated ion channel, 1                                                      | P2RX1                         | 1,04 |
| myoneurin                                                                                                 | MYNN                          | 1,04 |
| coiled-coil domain containing 185                                                                         | CCDC185                       | 1,04 |
| serine/arginine repetitive matrix 5                                                                       | SRRM5                         | 1,04 |
| HPN antisense RNA 1                                                                                       | HPN-AS1                       | 1,04 |
| family with sequence similarity 25, member G; family with sequence similarity 25, member C; protein FAM25 | FAM25G;<br>FAM25C;<br>FAM25BP | 1,04 |
| FRMPD3 antisense RNA 1                                                                                    | FRMPD3-AS1                    | 1,04 |
| slit guidance ligand 1; ARHGAP19-SLIT1 readthrough (NMD candidate)                                        | SLIT1; ARHGAP19-SLIT1         | 1,04 |
| ADP-ribosylation factor like GTPase 13B                                                                   | ARL13B                        | 1,04 |
| ankyrin repeat domain 34C                                                                                 | ANKRD34C                      | 1,04 |
| Memczak2013 ANTISENSE, coding, INTERNAL, intronic best transcript NM_080760                               | DACH1                         | 1,04 |
| crystallin mu                                                                                             | CRYM                          | 1,04 |
| phosphodiesterase 4D interacting protein                                                                  | PDE4DIP                       | 1,04 |
| SMG5 nonsense mediated mRNA decay factor                                                                  | SMG5                          | 1,04 |
| integrin beta 7                                                                                           | ITGB7                         | 1,04 |
| neuropeptide Y receptor Y2                                                                                | NPY2R                         | 1,04 |
| extracellular leucine-rich repeat and fibronectin type III domain containing 2                            | ELFN2                         | 1,04 |
| otogelin-like                                                                                             | OTOGL                         | 1,04 |
| piwi-like RNA-mediated gene silencing 1                                                                   | PIWIL1                        | 1,04 |
| hedgehog acyltransferase                                                                                  | HHAT                          | 1,04 |
| CaM kinase-like vesicle-associated                                                                        | CAMKV                         | 1,04 |
| lysine (K)-specific methyltransferase 5B                                                                  | KMT5B                         | 1,04 |
| transforming growth factor beta 2; TGFB2 overlapping transcript 1                                         | TGFB2; TGFB2-OT1              | 1,04 |
| oxysterol binding protein-like 5                                                                          | OSBPL5                        | 1,04 |
| myotubularin related protein 8                                                                            | MTMR8                         | 1,04 |
| cyclin B3                                                                                                 | CCNB3                         | 1,04 |
| kelch-like family member 29                                                                               | KLHL29                        | 1,04 |
| ankyrin repeat and SOCS box containing 5                                                                  | ASB5                          | 1,04 |
| intraflagellar transport 122                                                                              | IFT122                        | 1,04 |
| protein arginine methyltransferase 5                                                                      | PRMT5                         | 1,04 |
| solute carrier family 10, member 4                                                                        | SLC10A4                       | 1,04 |
| N-ethylmaleimide-sensitive factor attachment protein, beta                                                | NAPB                          | 1,04 |
| integrin alpha FG-GAP repeat containing 2                                                                 | ITFG2                         | 1,04 |
| Rho GTPase activating protein 28                                                                          | ARHGAP28                      | 1,04 |
| kallikrein related peptidase 7                                                                            | KLK7                          | 1,04 |
| glutamate receptor, ionotropic, AMPA 3                                                                    | GRIA3                         | 1,04 |

|                                                                                 |                |      |
|---------------------------------------------------------------------------------|----------------|------|
| retinol dehydrogenase 8 (all-trans)                                             | RDH8           | 1,04 |
| glycine receptor alpha 1                                                        | GLRA1          | 1,04 |
| vacuolar protein sorting 37 homolog C (S. cerevisiae)                           | VPS37C         | 1,04 |
| chromosome 17 open reading frame 74                                             | C17orf74       | 1,04 |
| v-myb avian myeloblastosis viral oncogene homolog-like<br>2                     | MYBL2          | 1,04 |
| ATPase type 13A5                                                                | ATP13A5        | 1,04 |
| transcription factor 21                                                         | TCF21          | 1,04 |
| BVES antisense RNA 1                                                            | BVES-AS1       | 1,04 |
| WAP four-disulfide core domain 10A                                              | WFDC10A        | 1,04 |
| chromosome X open reading frame 36                                              | CXorf36        | 1,04 |
| corin, serine peptidase                                                         | CORIN          | 1,04 |
| human immunodeficiency virus type I enhancer binding<br>protein 1               | HIVEP1         | 1,04 |
| tripartite motif containing 64B                                                 | TRIM64B        | 1,04 |
| calcium responsive transcription factor                                         | CARF           | 1,04 |
| zinc finger protein 669                                                         | ZNF669         | 1,04 |
| X antigen family, member 1E; X antigen family, member<br>1B                     | XAGE1E; XAGE1B | 1,04 |
| solute carrier family 35 (CMP-sialic acid transporter),<br>member A1            | SLC35A1        | 1,04 |
| dephospho-CoA kinase domain containing                                          | DCAKD          | 1,04 |
| Transcript Identified by AceView, Entrez Gene ID(s) 4179                        | CD46           | 1,04 |
| interferon-induced protein with tetratricopeptide repeats<br>2                  | IFIT2          | 1,04 |
| discs, large homolog 1 (Drosophila)                                             | DLG1           | 1,04 |
| interleukin 1 receptor associated kinase 4                                      | IRAK4          | 1,04 |
| exosome component 2                                                             | EXOSC2         | 1,04 |
| hydroxymethylbilane synthase                                                    | HMBS           | 1,04 |
| synaptotagmin X                                                                 | SYT10          | 1,04 |
| LUC7-like 3 pre-mRNA splicing factor                                            | LUC7L3         | 1,04 |
| CDC42 effector protein (Rho GTPase binding) 3                                   | CDC42EP3       | 1,04 |
| Jeck2013 ANTISENSE, coding, INTERNAL, OVEXON, UTR3<br>best transcript NM_020746 | MAVS           | 1,04 |
| complement factor H-related 5                                                   | CFHR5          | 1,04 |
| solute carrier family 25, member 39                                             | SLC25A39       | 1,04 |
| receptor accessory protein 1                                                    | REEP1          | 1,04 |
| potassium channel tetramerization domain containing 4                           | KCTD4          | 1,04 |
| olfactory receptor, family 10, subfamily A, member 3                            | OR10A3         | 1,04 |
| NACHT and WD repeat domain containing 2                                         | NWD2           | 1,04 |
| solute carrier family 12 (sodium/chloride transporter),<br>member 3             | SLC12A3        | 1,04 |
| PRAME family member 25                                                          | PRAMEF25       | 1,04 |
| meningioma (disrupted in balanced translocation) 1                              | MN1            | 1,04 |

|                                                                                                                             |                                                          |      |
|-----------------------------------------------------------------------------------------------------------------------------|----------------------------------------------------------|------|
| GTPase, IMAP family member 7                                                                                                | GIMAP7                                                   | 1,04 |
| succinate dehydrogenase complex subunit B, iron sulfur (lp)                                                                 | SDHB                                                     | 1,04 |
| structural maintenance of chromosomes 1B                                                                                    | SMC1B                                                    | 1,04 |
| protocadherin 12                                                                                                            | PCDH12                                                   | 1,04 |
| chromosome 3 open reading frame 30                                                                                          | C3orf30                                                  | 1,04 |
| CTAGE family, member 6                                                                                                      | CTAGE6                                                   | 1,04 |
| heparan sulfate (glucosamine) 3-O-sulfotransferase 6                                                                        | HS3ST6                                                   | 1,04 |
| superoxide dismutase 3, extracellular                                                                                       | SOD3                                                     | 1,04 |
| synaptosome associated protein 91kDa                                                                                        | SNAP91                                                   | 1,04 |
| Transcript Identified by AceView, Entrez Gene ID(s) 23126                                                                   | POGZ                                                     | 1,04 |
| dipeptidase 2                                                                                                               | DPEP2                                                    | 1,04 |
| methyltransferase like 11B                                                                                                  | METTL11B                                                 | 1,04 |
| coiled-coil serine rich protein 1                                                                                           | CCSER1                                                   | 1,04 |
| PR domain containing 12                                                                                                     | PRDM12                                                   | 1,04 |
| chromosome 11 open reading frame 21                                                                                         | C11orf21                                                 | 1,04 |
| radial spoke head 9 homolog (Chlamydomonas)                                                                                 | RSPH9                                                    | 1,04 |
| WD repeat domain 24                                                                                                         | WDR24                                                    | 1,04 |
| lymphocyte antigen 6 complex, locus G6C                                                                                     | LY6G6C                                                   | 1,04 |
| espin-like                                                                                                                  | ESPNL                                                    | 1,04 |
| keratin 5, type II                                                                                                          | KRT5                                                     | 1,04 |
| DnaJ (Hsp40) homolog, subfamily C, member 5; microRNA 941-1; microRNA 941-2; microRNA 941-3; microRNA 941-4; microRNA 941-5 | DNAJC5; MIR941-1; MIR941-2; MIR941-3; MIR941-4; MIR941-5 | 1,04 |
| solute carrier family 2 (facilitated glucose transporter), member 12                                                        | SLC2A12                                                  | 1,04 |
| SPT2 chromatin protein domain containing 1                                                                                  | SPTY2D1                                                  | 1,04 |
| ADP-ribosylation factor like GTPase 9                                                                                       | ARL9                                                     | 1,04 |
| uncharacterized LOC79160; novel transcript                                                                                  | LOC79160; RP5-907D15.4                                   | 1,04 |
| Niemann-Pick disease, type C2; microRNA 4709                                                                                | NPC2; MIR4709                                            | 1,04 |
| hyaluronan and proteoglycan link protein 3                                                                                  | HAPLN3                                                   | 1,04 |
| arginine vasopressin                                                                                                        | AVP                                                      | 1,04 |
| family with sequence similarity 170, member B                                                                               | FAM170B                                                  | 1,04 |
| Transcript Identified by AceView, Entrez Gene ID(s) 10265; novel transcript                                                 | CTD-3032H12.2; IRX5                                      | 1,04 |
| chromosome 17 open reading frame 64                                                                                         | C17orf64                                                 | 1,04 |
| defensin, beta 107A; defensin, beta 107B                                                                                    | DEFB107A; DEFB107B                                       | 1,04 |
| carnitine O-octanoyltransferase                                                                                             | CROT                                                     | 1,04 |
| parathyroid hormone 1 receptor                                                                                              | PTH1R                                                    | 1,04 |
| piccolo presynaptic cytomatrix protein                                                                                      | PCLO                                                     | 1,04 |

|                                                                           |          |      |
|---------------------------------------------------------------------------|----------|------|
| minichromosome maintenance domain containing 2                            | MCMD2    | 1,04 |
| glycophorin A (MNS blood group)                                           | GYPA     | 1,04 |
| coiled-coil domain containing 129                                         | CCDC129  | 1,04 |
| zinc finger protein 480                                                   | ZNF480   | 1,04 |
| translocase of inner mitochondrial membrane 21<br>homolog (yeast)         | TIMM21   | 1,04 |
| taste receptor, type 2, member 60                                         | TAS2R60  | 1,04 |
| complement component 1, q subcomponent-like 1                             | C1QL1    | 1,04 |
| B-cell CLL/lymphoma 6, member B                                           | BCL6B    | 1,04 |
| protein kinase, cAMP-dependent, regulatory, type II, alpha                | PRKAR2A  | 1,04 |
| zinc finger protein 234                                                   | ZNF234   | 1,04 |
| olfactory receptor, family 6, subfamily C, member 3                       | OR6C3    | 1,04 |
| tubulin tyrosine ligase-like family member 1                              | TTL1     | 1,04 |
| leucine rich repeat containing 55                                         | LRRC55   | 1,04 |
| IQ motif containing F2                                                    | IQCF2    | 1,04 |
| calcium homeostasis endoplasmic reticulum protein                         | CHERP    | 1,04 |
| calcium channel, voltage-dependent, L type, alpha 1F<br>subunit           | CACNA1F  | 1,04 |
| bactericidal/permeability-increasing protein                              | BPI      | 1,04 |
| forkhead box L1                                                           | FOX1     | 1,04 |
| potassium channel, voltage gated subfamily E regulatory<br>beta subunit 1 | KCNE1    | 1,04 |
| natural cytotoxicity triggering receptor 3                                | NCR3     | 1,04 |
| G protein-coupled receptor, class C, group 5, member B                    | GPRC5B   | 1,04 |
| heat shock protein, alpha-crystallin-related, B9                          | HSPB9    | 1,04 |
| chromosome 19 open reading frame 25                                       | C19orf25 | 1,04 |
| forkhead box N4                                                           | FOXN4    | 1,04 |
| IQ motif containing with AAA domain 1                                     | IQCA1    | 1,04 |
| olfactory receptor, family 5, subfamily K, member 4                       | OR5K4    | 1,04 |
| interferon-induced protein 44                                             | IFI44    | 1,04 |
| coiled-coil domain containing 150                                         | CCDC150  | 1,04 |
| DnaJ (Hsp40) homolog, subfamily B, member 6                               | DNAJB6   | 1,04 |
| secretory carrier membrane protein 3                                      | SCAMP3   | 1,04 |
| F-box and leucine-rich repeat protein 7                                   | FBXL7    | 1,04 |
| zinc finger protein 57                                                    | ZNF57    | 1,04 |
| methyltransferase like 5                                                  | METTL5   | 1,04 |
| proline rich 12                                                           | PRR12    | 1,04 |
| fukutin related protein                                                   | FKRP     | 1,04 |
| coiled-coil domain containing 85B                                         | CCDC85B  | 1,04 |
| gamma-aminobutyric acid (GABA) A receptor, alpha 2                        | GABRA2   | 1,04 |
| BTG family, member 2                                                      | BTG2     | 1,04 |
| secretin receptor                                                         | SCTR     | 1,04 |
| acid phosphatase, testicular                                              | ACPT     | 1,04 |
| DnaJ (Hsp40) homolog, subfamily C, member 17                              | DNAJC17  | 1,04 |



|                                                                                           |                           |      |
|-------------------------------------------------------------------------------------------|---------------------------|------|
| synovial sarcoma translocation, chromosome 18                                             | SS18                      | 1,04 |
| ribosomal protein S6 kinase, 90kDa, polypeptide 1                                         | RPS6KA1                   | 1,04 |
| membrane bound transcription factor peptidase, site 2;<br>YY2 transcription factor        | MBTPS2; YY2               | 1,04 |
| HHIP-like 1                                                                               | HHIPL1                    | 1,04 |
| protein prenyltransferase alpha subunit repeat containing<br>1                            | PTAR1                     | 1,04 |
| discs, large homolog 5 (Drosophila)                                                       | DLG5                      | 1,04 |
| SERTA domain containing 4                                                                 | SERTAD4                   | 1,04 |
| chromosome 1 open reading frame 158                                                       | C1orf158                  | 1,04 |
| ring finger protein 220                                                                   | RNF220                    | 1,04 |
| NRSN2 antisense RNA 1                                                                     | NRSN2-AS1                 | 1,04 |
| acyl-CoA synthetase medium-chain family member 6                                          | ACSM6                     | 1,04 |
| solute carrier family 18 (vesicular acetylcholine<br>transporter), member 3               | SLC18A3                   | 1,04 |
| chromosome 17 open reading frame 82                                                       | C17orf82                  | 1,04 |
| HIG1 hypoxia inducible domain family, member 1B                                           | HIGD1B                    | 1,04 |
| histamine receptor H1                                                                     | HRH1                      | 1,04 |
| hydroxysteroid (17-beta) dehydrogenase 6                                                  | HSD17B6                   | 1,04 |
| SEC14-like lipid binding 5                                                                | SEC14L5                   | 1,04 |
| zinc finger and SCAN domain containing 30                                                 | ZSCAN30                   | 1,04 |
| clavesin 1                                                                                | CLVS1                     | 1,04 |
| novel transcript; Transcript Identified by AceView, Entrez<br>Gene ID(s) 64116            | RP11-499E18.1;<br>SLC39A8 | 1,04 |
| proline rich 23 domain containing 2                                                       | PRR23D2                   | 1,04 |
| glutathione peroxidase 3                                                                  | GPX3                      | 1,04 |
| zinc finger protein 273                                                                   | ZNF273                    | 1,04 |
| Transcript Identified by AceView, Entrez Gene ID(s) 64327                                 | LMBR1                     | 1,04 |
| transmembrane protein 171                                                                 | TMEM171                   | 1,04 |
| leucine rich repeat containing 3B                                                         | LRRC3B                    | 1,04 |
| chorionic gonadotropin, beta polypeptide 5; chorionic<br>gonadotropin, beta polypeptide 8 | CGB5; CGB8                | 1,04 |
| ALG13, UDP-N-acetylglucosaminyltransferase subunit                                        | ALG13                     | 1,04 |
| keratin 1, type II                                                                        | KRT1                      | 1,04 |
| solute carrier family 2 (facilitated glucose transporter),<br>member 7                    | SLC2A7                    | 1,04 |
| non-specific cytotoxic cell receptor protein 1 homolog<br>(zebrafish)                     | NCCRP1                    | 1,04 |
| deleted in azoospermia-like                                                               | DAZL                      | 1,04 |
| dynein, axonemal, assembly factor 5                                                       | DNAAF5                    | 1,04 |
| 5-hydroxytryptamine (serotonin) receptor 1B, G protein-<br>coupled                        | HTR1B                     | 1,04 |
| Usher syndrome 1G (autosomal recessive)                                                   | USH1G                     | 1,04 |
| leucine rich repeat containing 15                                                         | LRRC15                    | 1,04 |

|                                                                                                              |                 |      |
|--------------------------------------------------------------------------------------------------------------|-----------------|------|
| zinc finger protein 19                                                                                       | ZNF19           | 1,04 |
| reticulon 3                                                                                                  | RTN3            | 1,04 |
| chromosome 1 open reading frame 146                                                                          | C1orf146        | 1,04 |
| chorionic gonadotropin, beta polypeptide 2                                                                   | CGB2            | 1,04 |
| polymerase (RNA) I polypeptide A                                                                             | POLR1A          | 1,04 |
| cancer/testis antigen 2                                                                                      | CTAG2           | 1,04 |
| BCL2-like 14 (apoptosis facilitator)                                                                         | BCL2L14         | 1,04 |
| purinergic receptor P2X, ligand gated ion channel, 7                                                         | P2RX7           | 1,04 |
| tRNA-histidine guanylyltransferase 1-like                                                                    | THG1L           | 1,04 |
| deoxyribonuclease II beta                                                                                    | DNASE2B         | 1,04 |
| prostate cancer susceptibility candidate 2                                                                   | PRAC2           | 1,04 |
| cathepsin S                                                                                                  | CTSS            | 1,04 |
| GA binding protein transcription factor alpha subunit                                                        | GABPA           | 1,04 |
| zinc finger, DHHC-type containing 22                                                                         | ZDHHC22         | 1,04 |
| protein disulfide isomerase-like, testis expressed                                                           | PDILT           | 1,04 |
| shisa family member 9                                                                                        | SHISA9          | 1,04 |
| cAMP-regulated phosphoprotein 19kDa                                                                          | ARPP19          | 1,04 |
| negative regulator of ubiquitin-like proteins 1                                                              | NUB1            | 1,04 |
| olfactory receptor, family 4, subfamily F, member 4;<br>olfactory receptor, family 4, subfamily F, member 17 | OR4F4; OR4F17   | 1,04 |
| neuropeptide VF precursor                                                                                    | NPVF            | 1,04 |
| tyrosyl-DNA phosphodiesterase 1                                                                              | TDP1            | 1,04 |
| zinc finger, DHHC-type containing 3                                                                          | ZDHHC3          | 1,04 |
| RNA guanylyltransferase and 5-phosphatase                                                                    | RNGTT           | 1,04 |
| cadherin, EGF LAG seven-pass G-type receptor 3;<br>microRNA 4793                                             | CELSR3; MIR4793 | 1,04 |
| kelch-like family member 9                                                                                   | KLHL9           | 1,04 |
| syntaphilin                                                                                                  | SNPH            | 1,04 |
| androgen-dependent TFPI-regulating protein                                                                   | ADTRP           | 1,04 |
| pyrroline-5-carboxylate reductase-like                                                                       | PYCRL           | 1,04 |
| Memczak2013 ANTISENSE, CDS, coding, INTERNAL best<br>transcript NM_020175                                    | DUS3L           | 1,04 |
| chloride intracellular channel 2                                                                             | CLIC2           | 1,04 |
| solute carrier family 9, subfamily A (NHE3, cation proton<br>antiporter 3), member 3                         | SLC9A3          | 1,04 |
| CDC42 small effector 2                                                                                       | CDC42SE2        | 1,04 |
| HSPE1-MOB4 readthrough                                                                                       | HSPE1-MOB4      | 1,04 |
| olfactory receptor, family 2, subfamily M, member 2                                                          | OR2M2           | 1,04 |
| Fc receptor-like 6                                                                                           | FCRL6           | 1,04 |
| early B-cell factor 1                                                                                        | EBF1            | 1,04 |
| arachidonate 15-lipoxygenase, type B                                                                         | ALOX15B         | 1,04 |
| Memczak2013 ALT_ACCEPTOR, ALT_DONOR, coding,<br>INTERNAL, intronic best transcript NM_003502                 | AXIN1           | 1,04 |
| zinc finger protein 502                                                                                      | ZNF502          | 1,04 |
| p21 protein (Cdc42/Rac)-activated kinase 3                                                                   | PAK3            | 1,04 |

|                                                                                                                                                               |                       |      |
|---------------------------------------------------------------------------------------------------------------------------------------------------------------|-----------------------|------|
| zinc finger protein 324B                                                                                                                                      | ZNF324B               | 1,03 |
| chromosome 1 open reading frame 220                                                                                                                           | C1orf220              | 1,03 |
| MIR670 host gene; hydroxysteroid (17-beta) dehydrogenase 12                                                                                                   | MIR670HG;<br>HSD17B12 | 1,03 |
| olfactory receptor, family 7, subfamily E, member 24                                                                                                          | OR7E24                | 1,03 |
| gap junction protein alpha 8                                                                                                                                  | GJA8                  | 1,03 |
| Memczak2013 ANTISENSE, CDS, coding, INTERNAL best transcript NM_001005417                                                                                     | B4GALT2               | 1,03 |
| autophagy related 16-like 2                                                                                                                                   | ATG16L2               | 1,03 |
| keratin associated protein 10-6                                                                                                                               | KRTAP10-6             | 1,03 |
| helicase-like transcription factor                                                                                                                            | HLTF                  | 1,03 |
| ring finger protein 135                                                                                                                                       | RNF135                | 1,03 |
| G protein-coupled receptor 31                                                                                                                                 | GPR31                 | 1,03 |
| zinc finger and BTB domain containing 48                                                                                                                      | ZBTB48                | 1,03 |
| zinc finger protein 227                                                                                                                                       | ZNF227                | 1,03 |
| ZFP37 zinc finger protein                                                                                                                                     | ZFP37                 | 1,03 |
| keratin associated protein 3-3                                                                                                                                | KRTAP3-3              | 1,03 |
| kin of IRRE like (Drosophila)                                                                                                                                 | KIRREL                | 1,03 |
| chromosome 9 open reading frame 66                                                                                                                            | C9orf66               | 1,03 |
| G protein-coupled receptor 68                                                                                                                                 | GPR68                 | 1,03 |
| Na <sup>+</sup> /K <sup>+</sup> transporting ATPase interacting 4                                                                                             | NKAIN4                | 1,03 |
| amidohydrolase domain containing 2                                                                                                                            | AMDHD2                | 1,03 |
| aldehyde dehydrogenase 3 family, member A2                                                                                                                    | ALDH3A2               | 1,03 |
| ataxin 3                                                                                                                                                      | ATXN3                 | 1,03 |
| ankyrin repeat and IBR domain containing 1                                                                                                                    | ANKIB1                | 1,03 |
| cathepsin O                                                                                                                                                   | CTSO                  | 1,03 |
| serine active site containing 1                                                                                                                               | SERAC1                | 1,03 |
| long intergenic non-protein coding RNA 1219                                                                                                                   | LINC01219             | 1,03 |
| Transcript Identified by AceView, Entrez Gene ID(s) 4684                                                                                                      | NCAM1                 | 1,03 |
| polypeptide N-acetylgalactosaminyltransferase 12                                                                                                              | GALNT12               | 1,03 |
| BUB1 mitotic checkpoint serine/threonine kinase B                                                                                                             | BUB1B                 | 1,03 |
| neurogenin 1                                                                                                                                                  | NEUROG1               | 1,03 |
| NME/NM23 nucleoside diphosphate kinase 3                                                                                                                      | NME3                  | 1,03 |
| killer cell lectin-like receptor subfamily B, member 1                                                                                                        | KLRB1                 | 1,03 |
| ZFP30 zinc finger protein                                                                                                                                     | ZFP30                 | 1,03 |
| RBM14-RBM4 readthrough                                                                                                                                        | RBM14-RBM4            | 1,03 |
| nebulin                                                                                                                                                       | NEB                   | 1,03 |
| aristaless related homeobox                                                                                                                                   | ARX                   | 1,03 |
| ABO blood group (transferase A, alpha 1-3-N-acetylgalactosaminyltransferase; transferase B, alpha 1-3-galactosyltransferase) [Source:HGNC Symbol;Acc:HGNC:79] | ABO                   | 1,03 |
| long intergenic non-protein coding RNA 1189                                                                                                                   | LINC01189             | 1,03 |
| zinc finger protein 879                                                                                                                                       | ZNF879                | 1,03 |

|                                                                      |          |      |
|----------------------------------------------------------------------|----------|------|
| LSM12 homolog                                                        | LSM12    | 1,03 |
| DLC1 Rho GTPase activating protein                                   | DLC1     | 1,03 |
| RNA binding motif protein 6                                          | RBM6     | 1,03 |
| SEC14 and spectrin domains 1                                         | SESTD1   | 1,03 |
| chromosome 6 open reading frame 222                                  | C6orf222 | 1,03 |
| keratin 82, type II                                                  | KRT82    | 1,03 |
| FANCD2 opposite strand                                               | FANCD2OS | 1,03 |
| lymphocyte antigen 6 complex, locus G5C                              | LY6G5C   | 1,03 |
| NADH dehydrogenase (ubiquinone) complex I, assembly factor 4         | NDUFAF4  | 1,03 |
| neural EGFL like 2                                                   | NELL2    | 1,03 |
| adrenoceptor beta 3                                                  | ADRB3    | 1,03 |
| coiled-coil glutamate rich protein 2                                 | CCER2    | 1,03 |
| sperm acrosome associated 4                                          | SPACA4   | 1,03 |
| spleen tyrosine kinase                                               | SYK      | 1,03 |
| aldolase A, fructose-bisphosphate                                    | ALDOA    | 1,03 |
| tumor susceptibility 101                                             | TSG101   | 1,03 |
| regulator of G-protein signaling 19                                  | RGS19    | 1,03 |
| GA binding protein transcription factor, beta subunit 2              | GABPB2   | 1,03 |
| tryptophan 2,3-dioxygenase                                           | TDO2     | 1,03 |
| protein phosphatase 1, regulatory subunit 32                         | PPP1R32  | 1,03 |
| calcium/calmodulin-dependent protein kinase II alpha                 | CAMK2A   | 1,03 |
| keratin 83, type II                                                  | KRT83    | 1,03 |
| olfactory receptor, family 5, subfamily I, member 1                  | OR5I1    | 1,03 |
| tetratricopeptide repeat domain 9C                                   | TTC9C    | 1,03 |
| ATPase, Ca <sup>++</sup> transporting, cardiac muscle, slow twitch 2 | ATP2A2   | 1,03 |
| adrenoceptor alpha 2A                                                | ADRA2A   | 1,03 |
| calicin                                                              | CCIN     | 1,03 |

|                                                                                                                                                                                                                                                                                                                                                                                                                                                                                                                                                                                                                                                                                                                                                                                                                                  |                                                                                                                                                                                                                                                                                                    |      |
|----------------------------------------------------------------------------------------------------------------------------------------------------------------------------------------------------------------------------------------------------------------------------------------------------------------------------------------------------------------------------------------------------------------------------------------------------------------------------------------------------------------------------------------------------------------------------------------------------------------------------------------------------------------------------------------------------------------------------------------------------------------------------------------------------------------------------------|----------------------------------------------------------------------------------------------------------------------------------------------------------------------------------------------------------------------------------------------------------------------------------------------------|------|
| <p>protocadherin gamma subfamily C, 3; protocadherin gamma subfamily A, 12; protocadherin gamma subfamily B, 4; protocadherin gamma subfamily A, 8; protocadherin gamma subfamily A, 1; protocadherin gamma subfamily A, 10; protocadherin gamma subfamily A, 11; protocadherin gamma subfamily A, 2; protocadherin gamma subfamily A, 3; protocadherin gamma subfamily A, 4; protocadherin gamma subfamily A, 5; protocadherin gamma subfamily A, 6; protocadherin gamma subfamily A, 7; protocadherin gamma subfamily A, 9; protocadherin gamma subfamily B, 1; protocadherin gamma subfamily B, 2; protocadherin gamma subfamily B, 3; protocadherin gamma subfamily B, 5; protocadherin gamma subfamily B, 6; protocadherin gamma subfamily B, 7; protocadherin gamma subfamily C, 4; protocadherin gamma subfamily C, 5</p> | <p>PCDHGC3;<br/>PCDHGA12;<br/>PCDHGB4;<br/>PCDHGA8;<br/>PCDHGA1;<br/>PCDHGA10;<br/>PCDHGA11;<br/>PCDHGA2;<br/>PCDHGA3;<br/>PCDHGA4;<br/>PCDHGA5;<br/>PCDHGA6;<br/>PCDHGA7;<br/>PCDHGA9;<br/>PCDHGB1;<br/>PCDHGB2;<br/>PCDHGB3;<br/>PCDHGB5;<br/>PCDHGB6;<br/>PCDHGB7;<br/>PCDHGC4;<br/>PCDHGC5</p> | 1,03 |
| chromosome 10 open reading frame 99                                                                                                                                                                                                                                                                                                                                                                                                                                                                                                                                                                                                                                                                                                                                                                                              | C10orf99                                                                                                                                                                                                                                                                                           | 1,03 |
| killer cell lectin-like receptor subfamily F, member 1                                                                                                                                                                                                                                                                                                                                                                                                                                                                                                                                                                                                                                                                                                                                                                           | KLRF1                                                                                                                                                                                                                                                                                              | 1,03 |
| synaptophysin-like 1                                                                                                                                                                                                                                                                                                                                                                                                                                                                                                                                                                                                                                                                                                                                                                                                             | SYPL1                                                                                                                                                                                                                                                                                              | 1,03 |
| vascular cell adhesion molecule 1                                                                                                                                                                                                                                                                                                                                                                                                                                                                                                                                                                                                                                                                                                                                                                                                | VCAM1                                                                                                                                                                                                                                                                                              | 1,03 |
| cell division cycle associated 2                                                                                                                                                                                                                                                                                                                                                                                                                                                                                                                                                                                                                                                                                                                                                                                                 | CDCA2                                                                                                                                                                                                                                                                                              | 1,03 |
| ST8 alpha-N-acetyl-neuraminide alpha-2,8-sialyltransferase 4                                                                                                                                                                                                                                                                                                                                                                                                                                                                                                                                                                                                                                                                                                                                                                     | ST8SIA4                                                                                                                                                                                                                                                                                            | 1,03 |
| ADAM metallopeptidase with thrombospondin type 1 motif 13                                                                                                                                                                                                                                                                                                                                                                                                                                                                                                                                                                                                                                                                                                                                                                        | ADAMTS13                                                                                                                                                                                                                                                                                           | 1,03 |
| cerebellin 4 precursor                                                                                                                                                                                                                                                                                                                                                                                                                                                                                                                                                                                                                                                                                                                                                                                                           | CBLN4                                                                                                                                                                                                                                                                                              | 1,03 |
| S-phase cyclin A-associated protein in the ER                                                                                                                                                                                                                                                                                                                                                                                                                                                                                                                                                                                                                                                                                                                                                                                    | SCAPER                                                                                                                                                                                                                                                                                             | 1,03 |
| mastermind-like transcriptional coactivator 3                                                                                                                                                                                                                                                                                                                                                                                                                                                                                                                                                                                                                                                                                                                                                                                    | MAML3                                                                                                                                                                                                                                                                                              | 1,03 |
| uncharacterized LOC100130451; novel transcript (LOC100130451); novel transcript                                                                                                                                                                                                                                                                                                                                                                                                                                                                                                                                                                                                                                                                                                                                                  | LOC100130451;<br>AC079610.2; RP11<br>105N14.2                                                                                                                                                                                                                                                      | 1,03 |
| carbonic anhydrase I                                                                                                                                                                                                                                                                                                                                                                                                                                                                                                                                                                                                                                                                                                                                                                                                             | CA1                                                                                                                                                                                                                                                                                                | 1,03 |
| homeobox B2                                                                                                                                                                                                                                                                                                                                                                                                                                                                                                                                                                                                                                                                                                                                                                                                                      | HOXB2                                                                                                                                                                                                                                                                                              | 1,03 |
| protocadherin-related 15                                                                                                                                                                                                                                                                                                                                                                                                                                                                                                                                                                                                                                                                                                                                                                                                         | PCDH15                                                                                                                                                                                                                                                                                             | 1,03 |

|                                                                                                                                                                                                                                                                                                                                                      |                      |      |
|------------------------------------------------------------------------------------------------------------------------------------------------------------------------------------------------------------------------------------------------------------------------------------------------------------------------------------------------------|----------------------|------|
| selenoprotein M; selenoprotein M<br>[Source:EntrezGene;Acc:140606]; Salzman2013<br>ANNOTATED, CDS, coding, OVCODE, OVERLAPTX,<br>OVEXON, UTR3 best transcript NM_080430;<br>Salzman2013 ANNOTATED, CDS, coding, OVCODE,<br>OVERLAPTX, OVEXON, UTR3, UTR5 best transcript<br>NM_080430; Transcript Identified by AceView, Entrez<br>Gene ID(s) 140606 | SELM                 | 1,03 |
| kelch domain containing 4                                                                                                                                                                                                                                                                                                                            | KLHDC4               | 1,03 |
| RIMS binding protein 2                                                                                                                                                                                                                                                                                                                               | RIMBP2               | 1,03 |
| ADAM metallopeptidase domain 21                                                                                                                                                                                                                                                                                                                      | ADAM21               | 1,03 |
| calcitonin-related polypeptide beta                                                                                                                                                                                                                                                                                                                  | CALCB                | 1,03 |
| Salzman2013 ANTISENSE, coding, INTERNAL, intronic<br>best transcript NM_001153                                                                                                                                                                                                                                                                       | ANXA4                | 1,03 |
| nuclear factor of activated T-cells, cytoplasmic,<br>calcineurin-dependent 2 interacting protein; microRNA<br>4517                                                                                                                                                                                                                                   | NFATC2IP;<br>MIR4517 | 1,03 |
| zinc finger protein 705A; family with sequence similarity<br>66, member C                                                                                                                                                                                                                                                                            | ZNF705A;<br>FAM66C   | 1,03 |
| ankyrin repeat domain 28                                                                                                                                                                                                                                                                                                                             | ANKRD28              | 1,03 |
| Cbp/p300-interacting transactivator, with Glu/Asp rich<br>carboxy-terminal domain, 4                                                                                                                                                                                                                                                                 | CITED4               | 1,03 |
| DNA nucleotidylexotransferase                                                                                                                                                                                                                                                                                                                        | DNTT                 | 1,03 |
| protein phosphatase 1, regulatory (inhibitor) subunit 14A                                                                                                                                                                                                                                                                                            | PPP1R14A             | 1,03 |
| caspase 1                                                                                                                                                                                                                                                                                                                                            | CASP1                | 1,03 |
| zinc finger, MYM-type 5                                                                                                                                                                                                                                                                                                                              | ZMYM5                | 1,03 |
| abhydrolase domain containing 6                                                                                                                                                                                                                                                                                                                      | ABHD6                | 1,03 |
| trophinin                                                                                                                                                                                                                                                                                                                                            | TRO                  | 1,03 |
| NOP2 nucleolar protein                                                                                                                                                                                                                                                                                                                               | NOP2                 | 1,03 |
| testis specific protein, Y-linked 3                                                                                                                                                                                                                                                                                                                  | TSPY3                | 1,03 |
| mitochondrial ribosomal protein L55                                                                                                                                                                                                                                                                                                                  | MRPL55               | 1,03 |
| unc-51 like kinase 4                                                                                                                                                                                                                                                                                                                                 | ULK4                 | 1,03 |
| nuclear receptor binding factor 2                                                                                                                                                                                                                                                                                                                    | NRBF2                | 1,03 |
| chromosome 15 open reading frame 56                                                                                                                                                                                                                                                                                                                  | C15orf56             | 1,03 |
| FYVE, RhoGEF and PH domain containing 5                                                                                                                                                                                                                                                                                                              | FGD5                 | 1,03 |
| family with sequence similarity 200, member A                                                                                                                                                                                                                                                                                                        | FAM200A              | 1,03 |
| P antigen family, member 4 (prostate associated)                                                                                                                                                                                                                                                                                                     | PAGE4                | 1,03 |
| rippy transcriptional repressor 1                                                                                                                                                                                                                                                                                                                    | RIPPLY1              | 1,03 |
| MAX interactor 1, dimerization protein                                                                                                                                                                                                                                                                                                               | MXI1                 | 1,03 |
| EPH receptor A5                                                                                                                                                                                                                                                                                                                                      | EPHA5                | 1,03 |
| SCO-spondin                                                                                                                                                                                                                                                                                                                                          | SSPO                 | 1,03 |
| KIAA0319                                                                                                                                                                                                                                                                                                                                             | KIAA0319             | 1,03 |
| polypyrimidine tract binding protein 2                                                                                                                                                                                                                                                                                                               | PTBP2                | 1,03 |
| SIN3 transcription regulator family member B                                                                                                                                                                                                                                                                                                         | SIN3B                | 1,03 |

|                                                                                              |                 |      |
|----------------------------------------------------------------------------------------------|-----------------|------|
| calpain 15; microRNA 5587                                                                    | CAPN15; MIR5587 | 1,03 |
| chromosome 1 open reading frame 229                                                          | C1orf229        | 1,03 |
| MAGE family member A6                                                                        | MAGEA6          | 1,03 |
| Memczak2013 ALT_ACCEPTOR, ALT_DONOR, coding, INTERNAL, intronic best transcript NM_001099272 | BTBD9           | 1,03 |
| cholinergic receptor, nicotinic beta 2                                                       | CHRNA2          | 1,03 |
| N-acetyltransferase 14 (GCN5-related, putative)                                              | NAT14           | 1,03 |
| ribosomal RNA processing 15 homolog                                                          | RRP15           | 1,03 |
| UL16 binding protein 2                                                                       | ULBP2           | 1,03 |
| VANGL planar cell polarity protein 2                                                         | VANGL2          | 1,03 |
| scavenger receptor class A, member 5                                                         | SCARA5          | 1,03 |
| potassium channel, voltage gated Shal related subfamily D, member 3                          | KCND3           | 1,03 |
| parathyroid hormone 2 receptor                                                               | PTH2R           | 1,03 |
| KIAA1755                                                                                     | KIAA1755        | 1,03 |
| neurexophilin and PC-esterase domain family, member 2                                        | NXPE2           | 1,03 |
| chemokine (C-X-C motif) receptor 5                                                           | CXCR5           | 1,03 |
| protein kinase, membrane associated tyrosine/threonine 1                                     | PKMYT1          | 1,03 |
| RAB9A, member RAS oncogene family                                                            | RAB9A           | 1,03 |
| trans-golgi network vesicle protein 23 homolog A (S. cerevisiae)                             | TVP23A          | 1,03 |
| CCR4-NOT transcription complex subunit 3                                                     | CNOT3           | 1,03 |
| dynein assembly factor with WDR repeat domains 1                                             | DAW1            | 1,03 |
| germinal center-associated, signaling and motility-like synaptoporin                         | GCSAML          | 1,03 |
| glutamate receptor, ionotropic, N-methyl-D-aspartate 3B                                      | GRIN3B          | 1,03 |
| zinc finger protein 790                                                                      | ZNF790          | 1,03 |
| chromosome 5 open reading frame 58                                                           | C5orf58         | 1,03 |
| fibronectin type III domain containing 5                                                     | FNDC5           | 1,03 |
| coiled-coil domain containing 84                                                             | CCDC84          | 1,03 |
| calcium/calmodulin-dependent serine protein kinase (MAGUK family)                            | CASK            | 1,03 |
| long intergenic non-protein coding RNA 92                                                    | LINC00092       | 1,03 |
| collagen, type XIX, alpha 1                                                                  | COL19A1         | 1,03 |
| major histocompatibility complex, class I, G                                                 | HLA-G           | 1,03 |
| Transcript Identified by AceView, Entrez Gene ID(s) 56890                                    | MDM1            | 1,03 |
| fucosyltransferase 9 (alpha (1,3) fucosyltransferase)                                        | FUT9            | 1,03 |
| phosphoglycerate mutase 2 (muscle)                                                           | PGAM2           | 1,03 |
| keratin 25, type I                                                                           | KRT25           | 1,03 |
| C-reactive protein, pentraxin-related                                                        | CRP             | 1,03 |

|                                                                                                                      |                       |      |
|----------------------------------------------------------------------------------------------------------------------|-----------------------|------|
| leucine rich repeat containing 38                                                                                    | LRRC38                | 1,03 |
| hypoxanthine phosphoribosyltransferase 1                                                                             | HPRT1                 | 1,03 |
| BAH domain and coiled-coil containing 1                                                                              | BAHCC1                | 1,03 |
| Transcript Identified by AceView, Entrez Gene ID(s) 60672                                                            | MIIP                  | 1,03 |
| transient receptor potential cation channel, subfamily C, member 3                                                   | TRPC3                 | 1,03 |
| optic atrophy 1 (autosomal dominant)                                                                                 | OPA1                  | 1,03 |
| transmembrane protein 207                                                                                            | TMEM207               | 1,03 |
| ribosomal protein L32; small nucleolar RNA, H/ACA box 7A                                                             | RPL32; SNORA7A        | 1,03 |
| cysteine rich C-terminal 1                                                                                           | CRCT1                 | 1,03 |
| developing brain homeobox 2                                                                                          | DBX2                  | 1,03 |
| solute carrier organic anion transporter family, member 6A1                                                          | SLCO6A1               | 1,03 |
| anaphase promoting complex subunit 1                                                                                 | ANAPC1                | 1,03 |
| CTAGE family, member 8                                                                                               | CTAGE8                | 1,03 |
| PYCARD antisense RNA 1                                                                                               | PYCARD-AS1            | 1,03 |
| zinc finger, DHHC-type containing 3                                                                                  | ZDHHC3                | 1,03 |
| KRAB-A domain containing 2                                                                                           | KRBA2                 | 1,03 |
| V-set and transmembrane domain containing 1                                                                          | VSTM1                 | 1,03 |
| putative homeodomain transcription factor 2                                                                          | PHTF2                 | 1,03 |
| retbindin                                                                                                            | RTBDN                 | 1,03 |
| myelin regulatory factor-like                                                                                        | MYRFL                 | 1,03 |
| ring finger protein 225                                                                                              | RNF225                | 1,03 |
| Norrie disease (pseudoglioma)                                                                                        | NDP                   | 1,03 |
| olfactory receptor, family 6, subfamily K, member 2                                                                  | OR6K2                 | 1,03 |
| solute carrier family 4 (sodium bicarbonate cotransporter), member 5                                                 | SLC4A5                | 1,03 |
| galactosylceramidase                                                                                                 | GALC                  | 1,03 |
| nuclear cap binding subunit 3                                                                                        | NCBP3                 | 1,03 |
| zinc finger protein 501 [Source:HGNC Symbol;Acc:HGNC:23717]                                                          | ZNF501                | 1,03 |
| eukaryotic elongation factor 2 lysine methyltransferase                                                              | EEF2KMT               | 1,03 |
| Zhang2013 ALT_ACCEPTOR, ALT_DONOR, coding, INTERNAL, intronic best transcript NM_001670                              | ARVCF                 | 1,03 |
| olfactory receptor, family 4, subfamily X, member 2 (gene/pseudogene)                                                | OR4X2                 | 1,03 |
| leukocyte receptor tyrosine kinase                                                                                   | LTK                   | 1,03 |
| zinc finger protein 428                                                                                              | ZNF428                | 1,03 |
| Memczak2013 ANTISENSE, coding, INTERNAL, intronic best transcript NM_175900; novel transcript, antisense to C16orf54 | AC009133.17; C16orf54 | 1,03 |
| sphingomyelin phosphodiesterase 4, neutral membrane (neutral sphingomyelinase-3)                                     | SMPD4                 | 1,03 |



|                                                                                                              |                       |      |
|--------------------------------------------------------------------------------------------------------------|-----------------------|------|
| glycosylphosphatidylinositol anchored high density lipoprotein binding protein 1                             | GPIHBP1               | 1,03 |
| nicotinate phosphoribosyltransferase                                                                         | NAPRT                 | 1,03 |
| olfactory receptor, family 51, subfamily G, member 2                                                         | OR51G2                | 1,03 |
| neuropeptide Y receptor Y4                                                                                   | NPY4R                 | 1,03 |
| histone cluster 1, H1d                                                                                       | HIST1H1D              | 1,03 |
| olfactory receptor, family 4, subfamily D, member 2                                                          | OR4D2                 | 1,03 |
| olfactory receptor, family 2, subfamily W, member 1                                                          | OR2W1                 | 1,03 |
| myosin, heavy chain 14, non-muscle                                                                           | MYH14                 | 1,03 |
| family with sequence similarity 162, member B                                                                | FAM162B               | 1,03 |
| deoxyhypusine synthase                                                                                       | DHPS                  | 1,03 |
| tubby like protein 2                                                                                         | TULP2                 | 1,03 |
| polymeric immunoglobulin receptor                                                                            | PIGR                  | 1,03 |
| desmoplakin                                                                                                  | DSP                   | 1,03 |
| olfactory receptor, family 4, subfamily A, member 15                                                         | OR4A15                | 1,03 |
| WAP four-disulfide core domain 8                                                                             | WFDC8                 | 1,03 |
| serum amyloid A2; SAA2-SAA4 readthrough; serum amyloid A4, constitutive                                      | SAA2; SAA2-SAA4; SAA4 | 1,03 |
| ATPase, H <sup>+</sup> transporting, lysosomal 56/58kDa, V1 subunit B1                                       | ATP6V1B1              | 1,03 |
| ubiquilin 2                                                                                                  | UBQLN2                | 1,03 |
| zinc finger (CCCH type), RNA binding motif and serine/arginine rich 2                                        | ZRSR2                 | 1,03 |
| F-box protein 41                                                                                             | FBXO41                | 1,03 |
| zinc finger protein 598                                                                                      | ZNF598                | 1,03 |
| CD8b molecule                                                                                                | CD8B                  | 1,03 |
| long intergenic non-protein coding RNA 552                                                                   | LINC00552             | 1,03 |
| NAD(P)H dehydrogenase, quinone 2                                                                             | NQO2                  | 1,03 |
| ST6 (alpha-N-acetyl-neuraminy-2,3-beta-galactosyl-1,3)-N-acetylgalactosaminide alpha-2,6-sialyltransferase 4 | ST6GALNAC4            | 1,03 |
| zinc finger protein 420                                                                                      | ZNF420                | 1,03 |
| zinc finger protein 707                                                                                      | ZNF707                | 1,03 |
| neuromedin S                                                                                                 | NMS                   | 1,03 |
| chemokine (C-X-C motif) ligand 9                                                                             | CXCL9                 | 1,03 |
| serine/threonine kinase-like domain containing 1 [Source:HGNC Symbol;Acc:HGNC:28669]                         | STKLD1                | 1,03 |
| protocadherin beta 3                                                                                         | PCDHB3                | 1,03 |
| Transcript Identified by AceView, Entrez Gene ID(s) 8453; novel transcript                                   | CUL2; RP11-297A16.2   | 1,03 |
| cadherin 3, type 1, P-cadherin (placental)                                                                   | CDH3                  | 1,03 |
| adipogenin                                                                                                   | ADIG                  | 1,03 |
| CD207 molecule, langerin                                                                                     | CD207                 | 1,03 |
| endogenous retrovirus group W, member 1                                                                      | ERVW-1                | 1,03 |
| cytochrome P450, family 4, subfamily X, polypeptide 1                                                        | CYP4X1                | 1,03 |

|                                                                                                   |               |      |
|---------------------------------------------------------------------------------------------------|---------------|------|
| cytochrome c oxidase subunit VIb polypeptide 2 (testis)                                           | COX6B2        | 1,03 |
| BTB (POZ) domain containing 18                                                                    | BTBD18        | 1,03 |
| potassium channel tetramerization domain containing 1                                             | KCTD1         | 1,03 |
| potassium channel, calcium activated intermediate/small conductance subfamily N alpha, member 2   | KCNN2         | 1,03 |
| peptidylprolyl isomerase A (cyclophilin A)-like 4C                                                | PPIAL4C       | 1,03 |
| POM121 and ZP3 fusion                                                                             | POMZP3        | 1,03 |
| mitochondrial ribosomal protein S30                                                               | MRPS30        | 1,03 |
| adhesion molecule with Ig-like domain 1                                                           | AMIGO1        | 1,03 |
| Zhang2013 ALT_ACCEPTOR, ALT_DONOR, coding, INTERNAL, intronic best transcript NM_002482           | NASP          | 1,03 |
| transmembrane protein 42                                                                          | TMEM42        | 1,03 |
| interleukin 12B                                                                                   | IL12B         | 1,03 |
| protein phosphatase 1, regulatory subunit 3F                                                      | PPP1R3F       | 1,03 |
| arachidonate 12-lipoxygenase, 12R type                                                            | ALOX12B       | 1,03 |
| shisa family member 8                                                                             | SHISA8        | 1,03 |
| zinc finger with KRAB and SCAN domains 7                                                          | ZKSCAN7       | 1,03 |
| lemur tyrosine kinase 2                                                                           | LMTK2         | 1,03 |
| centromere protein C                                                                              | CENPC         | 1,03 |
| PHD finger protein 6                                                                              | PHF6          | 1,03 |
| Sin3A associated protein 25kDa                                                                    | SAP25         | 1,03 |
| Rho guanine nucleotide exchange factor 35                                                         | ARHGEF35      | 1,03 |
| olfactory receptor, family 9, subfamily Q, member 2                                               | OR9Q2         | 1,03 |
| polypeptide N-acetylgalactosaminyltransferase 8                                                   | GALNT8        | 1,03 |
| olfactory receptor, family 6, subfamily X, member 1                                               | OR6X1         | 1,03 |
| PR domain containing 15                                                                           | PRDM15        | 1,03 |
| zinc finger, DHHC-type containing 3                                                               | ZDHHC3        | 1,03 |
| protocadherin beta 4                                                                              | PCDHB4        | 1,03 |
| leucine rich repeat containing 18                                                                 | LRRC18        | 1,03 |
| cathepsin F                                                                                       | CTSF          | 1,03 |
| keratin 37, type I                                                                                | KRT37         | 1,03 |
| v-myb avian myeloblastosis viral oncogene homolog-like 1                                          | MYBL1         | 1,03 |
| solute carrier family 7 (anionic amino acid transporter), member 13                               | SLC7A13       | 1,03 |
| centrosomal protein 131kDa                                                                        | CEP131        | 1,03 |
| major histocompatibility complex, class I-related                                                 | MR1           | 1,03 |
| peptidyl arginine deiminase, type IV                                                              | PADI4         | 1,03 |
| doublesex and mab-3 related transcription factor 2                                                | DMRT2         | 1,03 |
| misato 1, mitochondrial distribution and morphology regulator; misato family member 2, pseudogene | MSTO1; MSTO2P | 1,03 |
| keratin associated protein 22-1                                                                   | KRTAP22-1     | 1,03 |
| wingless-type MMTV integration site family, member 10B                                            | WNT10B        | 1,03 |

|                                                                                                        |                                  |      |
|--------------------------------------------------------------------------------------------------------|----------------------------------|------|
| neuronal tyrosine-phosphorylated phosphoinositide-3-kinase adaptor 2                                   | NYAP2                            | 1,03 |
| abhydrolase domain containing 16B                                                                      | ABHD16B                          | 1,03 |
| chromosome 11 open reading frame 70                                                                    | C11orf70                         | 1,03 |
| SYNJ2BP-COX16 readthrough; COX16 cytochrome c oxidase assembly homolog; synaptojanin 2 binding protein | SYNJ2BP-COX16;<br>COX16; SYNJ2BP | 1,03 |
| ADAM metallopeptidase domain 17                                                                        | ADAM17                           | 1,03 |
| transmembrane protein 225                                                                              | TMEM225                          | 1,03 |
| myosin, heavy chain 13, skeletal muscle                                                                | MYH13                            | 1,03 |
| solute carrier family 13 (sodium-dependent dicarboxylate transporter), member 2                        | SLC13A2                          | 1,03 |
| interleukin 21                                                                                         | IL21                             | 1,03 |
| RAB3 GTPase activating protein subunit 2 (non-catalytic); aurora kinase A pseudogene 1                 | RAB3GAP2;<br>AURKAPS1            | 1,03 |
| CTAGE family, member 9                                                                                 | CTAGE9                           | 1,03 |
| R3H domain containing-like                                                                             | R3HDML                           | 1,03 |
| homeobox B13                                                                                           | HOXB13                           | 1,03 |
| BarH-like homeobox 1                                                                                   | BARHL1                           | 1,03 |
| transmembrane protein 8B                                                                               | TMEM8B                           | 1,03 |
| chromosome 6 open reading frame 25                                                                     | C6orf25                          | 1,03 |
| DnaJ (Hsp40) homolog, subfamily C, member 28                                                           | DNAJC28                          | 1,03 |
| EPH receptor B2                                                                                        | EPHB2                            | 1,03 |
| ankyrin repeat domain 40                                                                               | ANKRD40                          | 1,03 |
| RNA binding motif protein 39                                                                           | RBM39                            | 1,03 |
| SET and MYND domain containing 4                                                                       | SMYD4                            | 1,03 |
| FOXL2 neighbor                                                                                         | FOXL2NB                          | 1,03 |
| cadherin 26                                                                                            | CDH26                            | 1,03 |
| crystallin gamma B                                                                                     | CRYGB                            | 1,03 |
| chromosome 8 open reading frame 74                                                                     | C8orf74                          | 1,03 |
| prune homolog 2 (Drosophila)                                                                           | PRUNE2                           | 1,03 |
| immunoglobulin superfamily, member 3                                                                   | IGSF3                            | 1,03 |
| frequently rearranged in advanced T-cell lymphomas 1                                                   | FRAT1                            | 1,03 |
| chemokine (C-X-C motif) ligand 10                                                                      | CXCL10                           | 1,03 |
| lipoma HMGIC fusion partner-like 2                                                                     | LHFPL2                           | 1,03 |
| transmembrane protein 206                                                                              | TMEM206                          | 1,03 |
| casein kinase 2, alpha 1 polypeptide                                                                   | CSNK2A1                          | 1,03 |
| ubiquitin specific peptidase 39                                                                        | USP39                            | 1,03 |
| zygote arrest 1-like                                                                                   | ZAR1L                            | 1,03 |
| zinc finger and BTB domain containing 32                                                               | ZBTB32                           | 1,03 |
| signal peptide, CUB domain, EGF-like 1                                                                 | SCUBE1                           | 1,03 |
| lectin, mannose-binding, 1 like                                                                        | LMAN1L                           | 1,03 |
| translation machinery associated 7 homolog                                                             | TMA7                             | 1,03 |
| G protein-coupled receptor associated sorting protein 1                                                | GPRASP1                          | 1,02 |

|                                                                                      |                   |      |
|--------------------------------------------------------------------------------------|-------------------|------|
| Homo sapiens acetylserotonin O-methyltransferase (ASMT), transcript variant 2, mRNA. | ASMT              | 1,02 |
| ST3 beta-galactoside alpha-2,3-sialyltransferase 3; microRNA 6079                    | ST3GAL3; MIR6079  | 1,02 |
| zinc finger protein 223                                                              | ZNF223            | 1,02 |
| WNK lysine deficient protein kinase 4                                                | WNK4              | 1,02 |
| ATPase, Ca++ transporting, cardiac muscle, fast twitch 1                             | ATP2A1            | 1,02 |
| potassium channel, voltage gated subfamily E regulatory beta subunit 1               | KCNE1             | 1,02 |
| homeobox C10                                                                         | HOXC10            | 1,02 |
| Rho guanine nucleotide exchange factor 33                                            | ARHGEF33          | 1,02 |
| ribosomal RNA processing 1B                                                          | RRP1B             | 1,02 |
| seizure related 6 homolog (mouse)-like                                               | SEZ6L             | 1,02 |
| ankyrin repeat and ubiquitin domain containing 1                                     | ANKUB1            | 1,02 |
| transmembrane protein 229A                                                           | TMEM229A          | 1,02 |
| Transcript Identified by AceView, Entrez Gene ID(s) 23122                            | CLASP2            | 1,02 |
| ribosomal protein S6 kinase, 90kDa, polypeptide 1                                    | RPS6KA1           | 1,02 |
| tektin 2 (testicular)                                                                | TEKT2             | 1,02 |
| solute carrier family 37 (glucose-6-phosphate transporter), member 1                 | SLC37A1           | 1,02 |
| suppression of tumorigenicity 18, zinc finger                                        | ST18              | 1,02 |
| IgLON family member 5                                                                | IGLON5            | 1,02 |
| CMT1A duplicated region transcript 15                                                | CDRT15            | 1,02 |
| triggering receptor expressed on myeloid cells-like 1                                | TREML1            | 1,02 |
| tripartite motif containing 62                                                       | TRIM62            | 1,02 |
| zinc finger and AT hook domain containing                                            | ZFAT              | 1,02 |
| olfactory receptor, family 2, subfamily C, member 3; GCSAML antisense RNA 1          | OR2C3; GCSAML-AS1 | 1,02 |
| kelch-like family member 40                                                          | KLHL40            | 1,02 |
| SPANX family, member N5                                                              | SPANXN5           | 1,02 |
| scratch family zinc finger 2                                                         | SCRT2             | 1,02 |
| family with sequence similarity 109, member B                                        | FAM109B           | 1,02 |
| tolloid like 2                                                                       | TLL2              | 1,02 |
| trafficking protein particle complex 3-like                                          | TRAPPC3L          | 1,02 |
| defensin, alpha 3, neutrophil-specific                                               | DEFA3             | 1,02 |
| family with sequence similarity 220, member A                                        | FAM220A           | 1,02 |
| WEE1 homolog 2 (S. pombe)                                                            | WEE2              | 1,02 |
| dynein, axonemal, light chain 4                                                      | DNAL4             | 1,02 |
| acyl-CoA dehydrogenase family, member 8                                              | ACAD8             | 1,02 |
| myogenic factor 5                                                                    | MYF5              | 1,02 |
| ets variant 1                                                                        | ETV1              | 1,02 |
| insulin receptor substrate 4                                                         | IRS4              | 1,02 |
| histidine decarboxylase                                                              | HDC               | 1,02 |

|                                                                                                                                                                                                                                                                                              |                                |      |
|----------------------------------------------------------------------------------------------------------------------------------------------------------------------------------------------------------------------------------------------------------------------------------------------|--------------------------------|------|
| RNA binding motif protein 14                                                                                                                                                                                                                                                                 | RBM14                          | 1,02 |
| solute carrier family 26 (anion exchanger), member 4                                                                                                                                                                                                                                         | SLC26A4                        | 1,02 |
| EPH receptor A2                                                                                                                                                                                                                                                                              | EPHA2                          | 1,02 |
| Homo sapiens synaptotagmin XV (SYT15), transcript variant a, mRNA.; Homo sapiens synaptotagmin XV (SYT15), transcript variant b, mRNA.; Homo sapiens synaptotagmin XV, mRNA (cDNA clone MGC:164845 IMAGE:40147906), complete cds.; Synaptotagmin-15 [Source:UniProtKB/Swiss-Prot;Acc:Q9BQS2] | SYT15; ABC7-42404400C24.1      | 1,02 |
| phospholipase A2, group IIF                                                                                                                                                                                                                                                                  | PLA2G2F                        | 1,02 |
| proteoglycan 2, bone marrow (natural killer cell activator, eosinophil granule major basic protein)                                                                                                                                                                                          | PRG2                           | 1,02 |
| chromosome 18 open reading frame 21                                                                                                                                                                                                                                                          | C18orf21                       | 1,02 |
| T-box 22                                                                                                                                                                                                                                                                                     | TBX22                          | 1,02 |
| uncharacterized LOC100130880; novel transcript                                                                                                                                                                                                                                               | LOC100130880;<br>AC022173.2    | 1,02 |
| uncharacterized LOC101928093; novel transcript                                                                                                                                                                                                                                               | LOC101928093;<br>RP11-779O18.1 | 1,02 |
| G protein-coupled receptor 180                                                                                                                                                                                                                                                               | GPR180                         | 1,02 |
| exocyst complex component 3-like 1                                                                                                                                                                                                                                                           | EXOC3L1                        | 1,02 |
| BPI fold containing family B, member 4                                                                                                                                                                                                                                                       | BPIFB4                         | 1,02 |
| HEAT repeat containing 9                                                                                                                                                                                                                                                                     | HEATR9                         | 1,02 |
| dual specificity phosphatase 2                                                                                                                                                                                                                                                               | DUSP2                          | 1,02 |
| microfibrillar associated protein 3 like                                                                                                                                                                                                                                                     | MFAP3L                         | 1,02 |
| glycine receptor alpha 2                                                                                                                                                                                                                                                                     | GLRA2                          | 1,02 |
| minichromosome maintenance complex component 3 associated protein                                                                                                                                                                                                                            | MCM3AP                         | 1,02 |
| 1-acylglycerol-3-phosphate O-acyltransferase 1; microRNA 6721                                                                                                                                                                                                                                | AGPAT1;<br>MIR6721             | 1,02 |
| adenylate kinase 1                                                                                                                                                                                                                                                                           | AK1                            | 1,02 |
| thyroid peroxidase                                                                                                                                                                                                                                                                           | TPO                            | 1,02 |
| protein tyrosine phosphatase domain containing 1                                                                                                                                                                                                                                             | PTPDC1                         | 1,02 |
| F-box protein 47                                                                                                                                                                                                                                                                             | FBXO47                         | 1,02 |
| peroxisome proliferator-activated receptor gamma, coactivator-related 1                                                                                                                                                                                                                      | PPRC1                          | 1,02 |
| solute carrier family 32 (GABA vesicular transporter), member 1                                                                                                                                                                                                                              | SLC32A1                        | 1,02 |
| wingless-type MMTV integration site family, member 7A                                                                                                                                                                                                                                        | WNT7A                          | 1,02 |
| transmembrane protein 249                                                                                                                                                                                                                                                                    | TMEM249                        | 1,02 |
| potassium channel, inwardly rectifying subfamily J, member 4                                                                                                                                                                                                                                 | KCNJ4                          | 1,02 |
| growth arrest and DNA-damage-inducible, gamma                                                                                                                                                                                                                                                | GADD45G                        | 1,02 |
| proteasome (prosome, macropain) subunit, beta type, 11                                                                                                                                                                                                                                       | PSMB11                         | 1,02 |

|                                                                                |                         |      |
|--------------------------------------------------------------------------------|-------------------------|------|
| uncharacterized LOC339059; novel transcript, antisense to FAM38A               | LOC339059; RP5-1142A6.8 | 1,02 |
| THUMP domain containing 2                                                      | THUMPD2                 | 1,02 |
| long intergenic non-protein coding RNA 885                                     | LINC00885               | 1,02 |
| solute carrier family 9, member C2 (putative)                                  | SLC9C2                  | 1,02 |
| diacylglycerol kinase, delta 130kDa                                            | DGKD                    | 1,02 |
| F-box and WD repeat domain containing 9                                        | FBXW9                   | 1,02 |
| vav 1 guanine nucleotide exchange factor                                       | VAV1                    | 1,02 |
| hemochromatosis type 2 (juvenile)                                              | HFE2                    | 1,02 |
| ribosomal protein S28                                                          | RPS28                   | 1,02 |
| Transcript Identified by AceView, Entrez Gene ID(s) 80232                      | WDR26                   | 1,02 |
| anaphase promoting complex subunit 11                                          | ANAPC11                 | 1,02 |
| mucin 4, cell surface associated                                               | MUC4                    | 1,02 |
| carboxylesterase 5A                                                            | CES5A                   | 1,02 |
| fibrinogen C domain containing 1                                               | FIBCD1                  | 1,02 |
| aldehyde dehydrogenase 8 family, member A1                                     | ALDH8A1                 | 1,02 |
| olfactory receptor, family 6, subfamily N, member 1                            | OR6N1                   | 1,02 |
| serine/threonine kinase 11 interacting protein                                 | STK11IP                 | 1,02 |
| 2,4-dienoyl-CoA reductase 2, peroxisomal                                       | DECR2                   | 1,02 |
| ribosomal protein S4, Y-linked 1                                               | RPS4Y1                  | 1,02 |
| solute carrier family 25, member 35                                            | SLC25A35                | 1,02 |
| tumor protein D52                                                              | TPD52                   | 1,02 |
| suppression of tumorigenicity 13 (colon carcinoma) (Hsp70 interacting protein) | ST13                    | 1,02 |
| nucleotide-binding oligomerization domain containing 2                         | NOD2                    | 1,02 |
| defensin, beta 103A                                                            | DEFB103A                | 1,02 |
| translocator protein (18kDa)                                                   | TSPO                    | 1,02 |
| engulfment and cell motility 2                                                 | ELMO2                   | 1,02 |
| mediator complex subunit 7                                                     | MED7                    | 1,02 |
| zygote arrest 1                                                                | ZAR1                    | 1,02 |
| chromosome 9 open reading frame 163                                            | C9orf163                | 1,02 |
| solute carrier family 22, member 14                                            | SLC22A14                | 1,02 |
| spindlin 1                                                                     | SPIN1                   | 1,02 |
| SET-like protein                                                               | SETSIP                  | 1,02 |
| small nuclear RNA activating complex polypeptide 3                             | SNAPC3                  | 1,02 |
| Transcript Identified by AceView, Entrez Gene ID(s) 149297; novel transcript   | RP11-9L18.3; FAM78B     | 1,02 |
| ring finger protein 215                                                        | RNF215                  | 1,02 |
| transglutaminase 4                                                             | TGM4                    | 1,02 |
| neuroblastoma breakpoint family, member 7                                      | NBPF7                   | 1,02 |
| olfactory receptor, family 2, subfamily M, member 5                            | OR2M5                   | 1,02 |
| protein phosphatase 6, catalytic subunit                                       | PPP6C                   | 1,02 |
| perilipin 4                                                                    | PLIN4                   | 1,02 |
| T-cell lymphoma invasion and metastasis 1                                      | TIAM1                   | 1,02 |

|                                                                                           |          |      |
|-------------------------------------------------------------------------------------------|----------|------|
| ubiquinol-cytochrome c reductase, complex III subunit XI                                  | UQCR11   | 1,02 |
| angiotensin I converting enzyme                                                           | ACE      | 1,02 |
| apolipoprotein A-II                                                                       | APOA2    | 1,02 |
| G protein-coupled receptor 62                                                             | GPR62    | 1,02 |
| SHQ1, H/ACA ribonucleoprotein assembly factor                                             | SHQ1     | 1,02 |
| transmembrane 6 superfamily member 1                                                      | TM6SF1   | 1,02 |
| glyceraldehyde-3-phosphate dehydrogenase                                                  | GAPDH    | 1,02 |
| keratin 27, type I                                                                        | KRT27    | 1,02 |
| muscular LMNA-interacting protein                                                         | MLIP     | 1,02 |
| myosin IH                                                                                 | MYO1H    | 1,02 |
| zinc finger and SCAN domain containing 31                                                 | ZSCAN31  | 1,02 |
| SEC14-like lipid binding 6                                                                | SEC14L6  | 1,02 |
| guanine deaminase                                                                         | GDA      | 1,02 |
| polymerase (DNA directed), epsilon, catalytic subunit                                     | POLE     | 1,02 |
| iroquois homeobox 6                                                                       | IRX6     | 1,02 |
| zinc finger, CCHC domain containing 18                                                    | ZCCHC18  | 1,02 |
| chromosome 16 open reading frame 97                                                       | C16orf97 | 1,02 |
| defensin, beta 123                                                                        | DEFB123  | 1,02 |
| microtubule associated tumor suppressor candidate 2                                       | MTUS2    | 1,02 |
| ankyrin 3, node of Ranvier (ankyrin G)                                                    | ANK3     | 1,02 |
| myotubularin related protein 7                                                            | MTMR7    | 1,02 |
| chromosome 1 open reading frame 228                                                       | C1orf228 | 1,02 |
| tubulin, gamma complex associated protein 2                                               | TUBGCP2  | 1,02 |
| Memczak2013 ALT_ACCEPTOR, ALT_DONOR, coding, INTERNAL, intronic best transcript NM_003369 | UVRAG    | 1,02 |
| calmodulin-like 3                                                                         | CALML3   | 1,02 |
| family with sequence similarity 177, member B                                             | FAM177B  | 1,02 |
| olfactory receptor, family 10, subfamily AD, member 1                                     | OR10AD1  | 1,02 |
| olfactory receptor, family 5, subfamily K, member 2                                       | OR5K2    | 1,02 |
| protocadherin 8                                                                           | PCDH8    | 1,02 |
| LysM, putative peptidoglycan-binding, domain containing 1                                 | LYSMD1   | 1,02 |
| chromosome 1 open reading frame 141                                                       | C1orf141 | 1,02 |
| X-ray repair complementing defective repair in Chinese hamster cells 2                    | XRCC2    | 1,02 |
| coiled-coil domain containing 39                                                          | CCDC39   | 1,02 |
| CUB and Sushi multiple domains 3                                                          | CSMD3    | 1,02 |
| PWP2 periodic tryptophan protein homolog (yeast)                                          | PWP2     | 1,02 |
| chymotrypsinogen B2                                                                       | CTRB2    | 1,02 |
| ORAI calcium release-activated calcium modulator 2                                        | ORAI2    | 1,02 |
| adenylate kinase 9                                                                        | AK9      | 1,02 |
| Memczak2013 ANTISENSE, INTERNAL, ncRNA best transcript NR_003587                          | MYO15B   | 1,02 |
| receptor tyrosine kinase-like orphan receptor 2                                           | ROR2     | 1,02 |
| casein kinase 2, alpha prime polypeptide                                                  | CSNK2A2  | 1,02 |

|                                                                                                                           |                            |      |
|---------------------------------------------------------------------------------------------------------------------------|----------------------------|------|
| RNA binding motif protein 41                                                                                              | RBM41                      | 1,02 |
| acyl-CoA thioesterase 8                                                                                                   | ACOT8                      | 1,02 |
| B-cell CLL/lymphoma 7C                                                                                                    | BCL7C                      | 1,02 |
| transmembrane protein 104                                                                                                 | TMEM104                    | 1,02 |
| ubiquitin conjugating enzyme E2B                                                                                          | UBE2B                      | 1,02 |
| G protein-coupled receptor 35                                                                                             | GPR35                      | 1,02 |
| Transcript Identified by AceView, Entrez Gene ID(s) 4211                                                                  | MEIS1                      | 1,02 |
| dispatched homolog 2 (Drosophila)                                                                                         | DISP2                      | 1,02 |
| UDP glycosyltransferase 8                                                                                                 | UGT8                       | 1,02 |
| microseminoprotein, prostate associated                                                                                   | MSMP                       | 1,02 |
| mutated in colorectal cancers                                                                                             | MCC                        | 1,02 |
| phosphoribosyl pyrophosphate synthetase 1-like 1                                                                          | PRPS1L1                    | 1,02 |
| dynactin 1                                                                                                                | DCTN1                      | 1,02 |
| peptidylprolyl isomerase A (cyclophilin A)-like 4E                                                                        | PPIAL4E                    | 1,02 |
| protease, serine, 33                                                                                                      | PRSS33                     | 1,02 |
| testis specific protein, Y-linked 2                                                                                       | TSPY2                      | 1,02 |
| D-tyrosyl-tRNA deacylase 1                                                                                                | DTD1                       | 1,02 |
| LIM homeobox 4                                                                                                            | LHX4                       | 1,02 |
| coiled-coil domain containing 88B                                                                                         | CCDC88B                    | 1,02 |
| maestro heat-like repeat family member 7;<br>tetratricopeptide repeat domain 4; MROH7-TTC4<br>readthrough (NMD candidate) | MROH7; TTC4;<br>MROH7-TTC4 | 1,02 |
| exonuclease 3-5 domain containing 3                                                                                       | EXD3                       | 1,02 |
| retinoschisin 1                                                                                                           | RS1                        | 1,02 |
| transient receptor potential cation channel, subfamily M,<br>member 1                                                     | TRPM1                      | 1,02 |
| chromosome 19 open reading frame 38                                                                                       | C19orf38                   | 1,02 |
| leucine rich repeat and fibronectin type III domain<br>containing 4                                                       | LRFN4                      | 1,02 |
| ubiquitin-conjugating enzyme E2Z                                                                                          | UBE2Z                      | 1,02 |
| calcium channel, voltage-dependent, gamma subunit 2                                                                       | CACNG2                     | 1,02 |
| mitochondrial methionyl-tRNA formyltransferase                                                                            | MTFMT                      | 1,02 |
| CD1b molecule                                                                                                             | CD1B                       | 1,02 |
| TBC1 domain family, member 13                                                                                             | TBC1D13                    | 1,02 |
| Sp9 transcription factor                                                                                                  | SP9                        | 1,02 |
| CCHC-type zinc finger, nucleic acid binding protein                                                                       | CNBP                       | 1,02 |
| cytochrome P450, family 1, subfamily B, polypeptide 1                                                                     | CYP1B1                     | 1,02 |
| taste receptor, type 2, member 40                                                                                         | TAS2R40                    | 1,02 |
| adenosine deaminase domain containing 1                                                                                   | ADAD1                      | 1,02 |
| guanine nucleotide binding protein (G protein), alpha 15<br>(Gq class)                                                    | GNA15                      | 1,02 |
| acid phosphatase, prostate                                                                                                | ACPP                       | 1,02 |
| glycophorin B (MNS blood group)                                                                                           | GYPB                       | 1,02 |
| DEAD (Asp-Glu-Ala-Asp) box polypeptide 39A                                                                                | DDX39A                     | 1,02 |



|                                                                                        |                               |      |
|----------------------------------------------------------------------------------------|-------------------------------|------|
| calcium channel, voltage-dependent, gamma subunit 7                                    | CACNG7                        | 1,02 |
| Fc fragment of IgG, high affinity Ib, receptor (CD64)                                  | FCGR1B                        | 1,02 |
| far upstream element (FUSE) binding protein 3                                          | FUBP3                         | 1,02 |
| inositol polyphosphate-5-phosphatase D                                                 | INPP5D                        | 1,02 |
| carboxypeptidase X (M14 family), member 1                                              | CPXM1                         | 1,02 |
| prostate cancer susceptibility candidate 1                                             | PRAC1                         | 1,02 |
| monoglyceride lipase                                                                   | MGLL                          | 1,02 |
| calpastatin                                                                            | CAST                          | 1,02 |
| long intergenic non-protein coding RNA 982                                             | LINC00982                     | 1,02 |
| KIAA1429                                                                               | KIAA1429                      | 1,02 |
| KIAA1211-like                                                                          | KIAA1211L                     | 1,02 |
| cyclic nucleotide gated channel beta 1                                                 | CNGB1                         | 1,02 |
| zinc finger protein 485                                                                | ZNF485                        | 1,02 |
| Memczak2013 ANTISENSE, coding, INTERNAL, intronic<br>best transcript NM_052931         | SLAMF6                        | 1,02 |
| putative uncharacterized protein MGC39545; novel<br>transcript, antisense to FEZ1      | LOC403312;<br>AP000708.1      | 1,02 |
| Sp7 transcription factor                                                               | SP7                           | 1,02 |
| striatin interacting protein 1                                                         | STRIP1                        | 1,02 |
| variable charge, X-linked; variable charge, X-linked 3A                                | VCX; VCX3A                    | 1,02 |
| zinc finger protein 627                                                                | ZNF627                        | 1,02 |
| Transcript Identified by AceView, Entrez Gene ID(s)<br>128209; novel transcript        | RP5-1198020.4;<br>KLF17       | 1,02 |
| ISY1 splicing factor homolog                                                           | ISY1                          | 1,02 |
| DnaJ (Hsp40) homolog, subfamily C, member 5 beta                                       | DNAJC5B                       | 1,02 |
| family with sequence similarity 132, member A                                          | FAM132A                       | 1,02 |
| RAS guanyl releasing protein 4                                                         | RASGRP4                       | 1,02 |
| basic leucine zipper transcription factor, ATF-like 3                                  | BATF3                         | 1,02 |
| transmembrane protease, serine 11B                                                     | TMPRSS11B                     | 1,02 |
| uncharacterized LOC100131496; novel transcript,<br>antisense to ZMYND8                 | LOC100131496;<br>RP4-569M23.5 | 1,02 |
| interferon, lambda receptor 1                                                          | IFNLR1                        | 1,02 |
| ribosomal protein L7a                                                                  | RPL7A                         | 1,02 |
| nuclear factor of kappa light polypeptide gene enhancer<br>in B-cells inhibitor-like 1 | NFKBIL1                       | 1,02 |
| tRNA selenocysteine 1 associated protein 1                                             | TRNAU1AP                      | 1,02 |
| transmembrane protein 252                                                              | TMEM252                       | 1,02 |
| chromosome 6 open reading frame 203                                                    | C6orf203                      | 1,02 |
| P antigen family, member 1 (prostate associated)                                       | PAGE1                         | 1,02 |
| ninjurin 2                                                                             | NINJ2                         | 1,02 |
| fibroblast growth factor 22                                                            | FGF22                         | 1,02 |
| teneurin transmembrane protein 1                                                       | TENM1                         | 1,02 |
| chromosome 9 open reading frame 114                                                    | C9orf114                      | 1,02 |
| activity-regulated cytoskeleton-associated protein                                     | ARC                           | 1,02 |
| kelch-like family member 28                                                            | KLHL28                        | 1,02 |

|                                                                                   |                     |      |
|-----------------------------------------------------------------------------------|---------------------|------|
| peptidase inhibitor 15                                                            | PI15                | 1,02 |
| Tu translation elongation factor, mitochondrial;<br>microRNA 4721                 | TUFM; MIR4721       | 1,02 |
| orofacial cleft 1 candidate 1                                                     | OFCC1               | 1,02 |
| casein kinase 2, alpha 3 polypeptide                                              | CSNK2A3             | 1,02 |
| tight junction protein 1                                                          | TJP1                | 1,02 |
| RanBP-type and C3HC4-type zinc finger containing 1                                | RBCK1               | 1,02 |
| lemur tyrosine kinase 3                                                           | LMTK3               | 1,02 |
| cytochrome P450, family 2, subfamily D, polypeptide 6                             | CYP2D6              | 1,02 |
| ganglioside induced differentiation associated protein 1                          | GDAP1               | 1,02 |
| glioma tumor suppressor candidate region gene 1                                   | GLTSCR1             | 1,02 |
| prostate and breast cancer overexpressed 1                                        | PBOV1               | 1,02 |
| chromosome 19 open reading frame 67                                               | C19orf67            | 1,02 |
| IL2-inducible T-cell kinase                                                       | ITK                 | 1,02 |
| cytochrome c oxidase assembly factor 1 homolog                                    | COA1                | 1,02 |
| acid sensing ion channel 3                                                        | ASIC3               | 1,02 |
| zinc finger protein 728                                                           | ZNF728              | 1,02 |
| alanine and arginine rich domain containing protein                               | AARD                | 1,02 |
| myosin phosphatase Rho interacting protein                                        | MPRIP               | 1,02 |
| sorting nexin 19                                                                  | SNX19               | 1,02 |
| fibronectin type III and SPRY domain containing 1                                 | FSD1                | 1,02 |
| KIAA2022                                                                          | KIAA2022            | 1,02 |
| antioxidant 1 copper chaperone                                                    | ATOX1               | 1,02 |
| zinc finger protein 284                                                           | ZNF284              | 1,02 |
| amyloid beta (A4) precursor protein-binding, family B,<br>member 3; microRNA 6831 | APBB3; MIR6831      | 1,02 |
| TNFSF12-TNFSF13 readthrough                                                       | TNFSF12-<br>TNFSF13 | 1,02 |
| Transcript Identified by AceView, Entrez Gene ID(s) 9695                          | EDEM1               | 1,02 |
| GRAM domain containing 1B                                                         | GRAMD1B             | 1,02 |
| placenta expressed transcript 1                                                   | PLET1               | 1,02 |
| chromosome 17 open reading frame 80                                               | C17orf80            | 1,02 |
| syntaxin binding protein 1                                                        | STXBP1              | 1,02 |
| cytochrome b-245, alpha polypeptide                                               | CYBA                | 1,02 |
| small proline-rich protein 2F                                                     | SPRR2F              | 1,02 |
| chromosome 7 open reading frame 69                                                | C7orf69             | 1,02 |
| nuclear receptor subfamily 4, group A, member 1                                   | NR4A1               | 1,02 |
| motilin receptor                                                                  | MLNR                | 1,02 |
| zinc finger protein 681                                                           | ZNF681              | 1,02 |
| chromosome 11 open reading frame 53                                               | C11orf53            | 1,02 |
| PRAME family member 25                                                            | PRAMEF25            | 1,02 |
| carbonic anhydrase XIV                                                            | CA14                | 1,02 |
| caspase 12 (gene/pseudogene)                                                      | CASP12              | 1,02 |
| RNA binding motif protein 20                                                      | RBM20               | 1,02 |

|                                                                                  |                |      |
|----------------------------------------------------------------------------------|----------------|------|
| v-crck avian sarcoma virus CT10 oncogene homolog                                 | CRK            | 1,02 |
| chromosome 1 open reading frame 204                                              | C1orf204       | 1,02 |
| hemoglobin, epsilon 1                                                            | HBE1           | 1,02 |
| Ras converting CAAX endopeptidase 1; chromosome 11<br>open reading frame 80      | RCE1; C11orf80 | 1,02 |
| cholinergic receptor, nicotinic beta 3                                           | CHRNA3         | 1,02 |
| neurofilament, light polypeptide                                                 | NEFL           | 1,02 |
| chromosome 11 open reading frame 91                                              | C11orf91       | 1,02 |
| metallophosphoesterase domain containing 1                                       | MPPED1         | 1,02 |
| ureidoimidazoline (2-oxo-4-hydroxy-4-carboxy-5-)<br>decarboxylase                | URAD           | 1,02 |
| proline rich 21                                                                  | PRR21          | 1,02 |
| ribosomal protein S6 kinase, 90kDa, polypeptide 1                                | RPS6KA1        | 1,02 |
| transmembrane protein 47                                                         | TMEM47         | 1,02 |
| olfactory receptor, family 2, subfamily V, member 1                              | OR2V1          | 1,02 |
| senataxin                                                                        | SETX           | 1,02 |
| ATP synthase, H <sup>+</sup> transporting, mitochondrial Fo complex<br>subunit G | ATP5L          | 1,02 |
| tudor domain containing 6                                                        | TDRD6          | 1,02 |
| cytokine like 1                                                                  | CYTL1          | 1,02 |
| chromosome X open reading frame 67                                               | CXorf67        | 1,02 |
| NK2 homeobox 3                                                                   | NKX2-3         | 1,02 |
| synaptonemal complex central element protein 1-like                              | SYCE1L         | 1,02 |
| potassium channel, voltage gated eag related subfamily<br>H, member 8            | KCNH8          | 1,02 |
| potassium channel, inwardly rectifying subfamily J,<br>member 12                 | KCNJ12         | 1,02 |
| transmembrane protein 235                                                        | TMEM235        | 1,02 |
| toll-like receptor 2                                                             | TLR2           | 1,02 |
| proline rich Gla (G-carboxyglutamic acid) 1                                      | PRRG1          | 1,02 |
| sperm associated antigen 16                                                      | SPAG16         | 1,02 |
| NADH dehydrogenase (ubiquinone) 1 alpha subcomplex,<br>10, 42kDa                 | NDUFA10        | 1,02 |
| azurocidin 1                                                                     | AZU1           | 1,02 |
| glutamate receptor, ionotropic, delta 2 (Grid2) interacting<br>protein           | GRID2IP        | 1,02 |
| integrin alpha L                                                                 | ITGAL          | 1,02 |
| spermatogenesis and centriole associated 1                                       | SPATC1         | 1,02 |
| cholinergic receptor, muscarinic 3                                               | CHRM3          | 1,02 |
| methenyltetrahydrofolate synthetase domain containing                            | MTHFSD         | 1,02 |
| golgin A6 family-like 22                                                         | GOLGA6L22      | 1,02 |
| transmembrane and immunoglobulin domain containing<br>2                          | TMIGD2         | 1,02 |
| Myb/SANT-like DNA-binding domain containing 1                                    | MSANTD1        | 1,02 |

|                                                                                                                                                     |                                            |      |
|-----------------------------------------------------------------------------------------------------------------------------------------------------|--------------------------------------------|------|
| family with sequence similarity 50, member B                                                                                                        | FAM50B                                     | 1,02 |
| butyrophilin, subfamily 2, member A1                                                                                                                | BTN2A1                                     | 1,02 |
| RAS-like, family 11, member B                                                                                                                       | RASL11B                                    | 1,02 |
| glycine receptor alpha 3                                                                                                                            | GLRA3                                      | 1,02 |
| RAB3 GTPase activating protein subunit 1 (catalytic)                                                                                                | RAB3GAP1                                   | 1,02 |
| coiled-coil domain containing 27                                                                                                                    | CCDC27                                     | 1,01 |
| oxysterol binding protein-like 2                                                                                                                    | OSBPL2                                     | 1,01 |
| Fc receptor-like 5                                                                                                                                  | FCRL5                                      | 1,01 |
| v-kit Hardy-Zuckerman 4 feline sarcoma viral oncogene homolog                                                                                       | KIT                                        | 1,01 |
| tetraspanin 2                                                                                                                                       | TSPAN2                                     | 1,01 |
| teashirt zinc finger homeobox 3                                                                                                                     | TSHZ3                                      | 1,01 |
| protein inhibitor of activated STAT 1                                                                                                               | PIAS1                                      | 1,01 |
| eukaryotic translation initiation factor 4A1; small nucleolar RNA, C/D box 10; small nucleolar RNA, H/ACA box 67; small nucleolar RNA, H/ACA box 48 | EIF4A1;<br>SNORD10;<br>SNORA67;<br>SNORA48 | 1,01 |
| uncharacterized LOC388780; putative novel transcript                                                                                                | LOC388780; RP11-128M1.1                    | 1,01 |
| matrix metalloproteinase 8                                                                                                                          | MMP8                                       | 1,01 |
| RAD51 recombinase                                                                                                                                   | RAD51                                      | 1,01 |
| homeobox D13                                                                                                                                        | HOXD13                                     | 1,01 |
| methionyl aminopeptidase 1                                                                                                                          | METAP1                                     | 1,01 |
| aminoacylase 1                                                                                                                                      | ACY1                                       | 1,01 |
| PRAME family member 25; PRAME family member 26                                                                                                      | PRAMEF25;<br>PRAMEF26                      | 1,01 |
| fizzy/cell division cycle 20 related 1                                                                                                              | FZR1                                       | 1,01 |
| cat eye syndrome chromosome region, candidate 1                                                                                                     | CECR1                                      | 1,01 |
| G protein-coupled receptor 174                                                                                                                      | GPR174                                     | 1,01 |
| spermatogenesis associated 33                                                                                                                       | SPATA33                                    | 1,01 |
| kelch domain containing 1                                                                                                                           | KLHDC1                                     | 1,01 |
| homeobox A7                                                                                                                                         | HOXA7                                      | 1,01 |
| phospholipase B domain containing 1                                                                                                                 | PLBD1                                      | 1,01 |
| zinc finger protein 26                                                                                                                              | ZNF26                                      | 1,01 |
| Mediterranean fever                                                                                                                                 | MEFV                                       | 1,01 |
| dehydrogenase/reductase (SDR family) member 3; microRNA 6730                                                                                        | DHRS3; MIR6730                             | 1,01 |
| chromosome 20 open reading frame 85                                                                                                                 | C20orf85                                   | 1,01 |
| pentraxin 3, long                                                                                                                                   | PTX3                                       | 1,01 |
| zinc finger protein 609                                                                                                                             | ZNF609                                     | 1,01 |
| Jeck2013 ANTISENSE, coding, INTERNAL, intronic best transcript NM_005336                                                                            | HDLBP                                      | 1,01 |
| uncharacterized LOC100652929; novel transcript; uncharacterized LOC100652929 [Source:EntrezGene;Acc:100652929]                                      | HP09025; CTD-2116F7.1                      | 1,01 |

|                                                                              |          |      |
|------------------------------------------------------------------------------|----------|------|
| sorting nexin 20                                                             | SNX20    | 1,01 |
| radical S-adenosyl methionine domain containing 2                            | RSAD2    | 1,01 |
| RAS-like, family 12                                                          | RASL12   | 1,01 |
| toll-like receptor 10                                                        | TLR10    | 1,01 |
| N(alpha)-acetyltransferase 11, NatA catalytic subunit                        | NAA11    | 1,01 |
| RNA binding protein S1, serine-rich domain                                   | RNPS1    | 1,01 |
| arginyl aminopeptidase (aminopeptidase B)                                    | RNPEP    | 1,01 |
| death-associated protein kinase 2                                            | DAPK2    | 1,01 |
| deleted in lymphocytic leukemia, 7                                           | DLEU7    | 1,01 |
| G protein-coupled receptor 176                                               | GPR176   | 1,01 |
| protamine 3                                                                  | PRM3     | 1,01 |
| indolethylamine N-methyltransferase                                          | INMT     | 1,01 |
| phosphofructokinase, muscle                                                  | PFKM     | 1,01 |
| methylmalonic aciduria (cobalamin deficiency) cblD type, with homocystinuria | MMADHC   | 1,01 |
| FYVE, RhoGEF and PH domain containing 3                                      | FGD3     | 1,01 |
| transient receptor potential cation channel, subfamily M, member 5           | TRPM5    | 1,01 |
| secretoglobin, family 1D, member 2                                           | SCGB1D2  | 1,01 |
| leucine rich repeat containing 10                                            | LRRC10   | 1,01 |
| alkaline phosphatase, liver/bone/kidney                                      | ALPL     | 1,01 |
| vacuolar protein sorting 33 homolog B (yeast)                                | VPS33B   | 1,01 |
| cofilin 1 (non-muscle)                                                       | CFL1     | 1,01 |
| WD repeat domain 91                                                          | WDR91    | 1,01 |
| docking protein 2                                                            | DOK2     | 1,01 |
| KIAA1143                                                                     | KIAA1143 | 1,01 |
| zinc finger protein 391                                                      | ZNF391   | 1,01 |
| RAB34, member RAS oncogene family                                            | RAB34    | 1,01 |
| kelch-like family member 34                                                  | KLHL34   | 1,01 |
| Ras association (RalGDS/AF-6) domain family member 1                         | RASSF1   | 1,01 |
| WD repeat domain 11                                                          | WDR11    | 1,01 |
| proline rich 33                                                              | PRR33    | 1,01 |
| sparc/osteonectin, cwcv and kazal-like domains proteoglycan (testican) 3     | SPOCK3   | 1,01 |
| phosphatidylinositol-4-phosphate 5-kinase, type I, gamma                     | PIP5K1C  | 1,01 |
| monocyte to macrophage differentiation-associated 2                          | MMD2     | 1,01 |
| LIM homeobox 5                                                               | LHX5     | 1,01 |
| zinc finger with KRAB and SCAN domains 7                                     | ZKSCAN7  | 1,01 |
| elaC ribonuclease Z 2                                                        | ELAC2    | 1,01 |
| ankyrin repeat domain 35                                                     | ANKRD35  | 1,01 |
| phospholipase A2, group VI (cytosolic, calcium-independent)                  | PLA2G6   | 1,01 |
| armadillo repeat containing 10                                               | ARMC10   | 1,01 |

|                                                                             |                |      |
|-----------------------------------------------------------------------------|----------------|------|
| tetratricopeptide repeat domain 27; microRNA 4765                           | TTC27; MIR4765 | 1,01 |
| growth hormone releasing hormone                                            | GHRH           | 1,01 |
| telomere maintenance 2                                                      | TELO2          | 1,01 |
| major histocompatibility complex, class II, DQ alpha 2                      | HLA-DQA2       | 1,01 |
| small lysine-rich protein 1                                                 | SMKR1          | 1,01 |
| Transcript Identified by AceView, Entrez Gene ID(s) 640                     | BLK            | 1,01 |
| hyaluronan and proteoglycan link protein 4                                  | HAPLN4         | 1,01 |
| sarcalumenin                                                                | SRL            | 1,01 |
| X-prolyl aminopeptidase (aminopeptidase P) 2, membrane-bound                | XPNPEP2        | 1,01 |
| DEAD (Asp-Glu-Ala-Asp) box polypeptide 54                                   | DDX54          | 1,01 |
| corticotropin releasing hormone receptor 1                                  | CRHR1          | 1,01 |
| zinc finger protein 273                                                     | ZNF273         | 1,01 |
| CWC22 homolog, spliceosome-associated protein                               | CWC22          | 1,01 |
| iroquois homeobox 2                                                         | IRX2           | 1,01 |
| cytochrome c oxidase subunit VIIa polypeptide 1 (muscle)                    | COX7A1         | 1,01 |
| G protein-coupled receptor 158                                              | GPR158         | 1,01 |
| excision repair cross-complementation group 4                               | ERCC4          | 1,01 |
| retinal pigment epithelium-derived rhodopsin homolog                        | RRH            | 1,01 |
| olfactory receptor, family 7, subfamily A, member 5                         | OR7A5          | 1,01 |
| WD repeat domain 78                                                         | WDR78          | 1,01 |
| retinaldehyde binding protein 1                                             | RLBP1          | 1,01 |
| golgin A7 family, member B                                                  | GOLGA7B        | 1,01 |
| olfactory receptor, family 2, subfamily A, member 25                        | OR2A25         | 1,01 |
| transmembrane protein 11                                                    | TMEM11         | 1,01 |
| GRAM domain containing 1A                                                   | GRAMD1A        | 1,01 |
| chromodomain helicase DNA binding protein 4                                 | CHD4           | 1,01 |
| neural EGFL like 1                                                          | NELL1          | 1,01 |
| solute carrier family 4 (anion exchanger), member 3                         | SLC4A3         | 1,01 |
| chromosome 20 open reading frame 144                                        | C20orf144      | 1,01 |
| smoothelin-like 1                                                           | SMTNL1         | 1,01 |
| epithelial splicing regulatory protein 1                                    | ESRP1          | 1,01 |
| olfactory receptor, family 52, subfamily N, member 4 (gene/pseudogene)      | OR52N4         | 1,01 |
| KH homology domain containing 1                                             | KHDC1          | 1,01 |
| Transcript Identified by AceView, Entrez Gene ID(s) 1785                    | DNM2           | 1,01 |
| NIMA-related kinase 5                                                       | NEK5           | 1,01 |
| basic helix-loop-helix family, member e23                                   | BHLHE23        | 1,01 |
| RNA pseudouridylate synthase domain containing 3                            | RPUSD3         | 1,01 |
| olfactory receptor, family 5, subfamily K, member 3                         | OR5K3          | 1,01 |
| transmembrane protein 229B                                                  | TMEM229B       | 1,01 |
| Memczak2013 ANTISENSE, coding, INTERNAL, intronic best transcript NM_016463 | CXXC5          | 1,01 |

|                                                                                                                        |                 |      |
|------------------------------------------------------------------------------------------------------------------------|-----------------|------|
| SPECC1L-ADORA2A readthrough (NMD candidate)                                                                            | SPECC1L-ADORA2A | 1,01 |
| MSS51 mitochondrial translational activator                                                                            | MSS51           | 1,01 |
| twisted gastrulation BMP signaling modulator 1                                                                         | TWSG1           | 1,01 |
| leucine rich repeat containing 37, member A5, pseudogene                                                               | LRR37A5P        | 1,01 |
| radical S-adenosyl methionine domain containing 1                                                                      | RSAD1           | 1,01 |
| keratin associated protein 13-4                                                                                        | KRTAP13-4       | 1,01 |
| pituitary tumor-transforming 1 interacting protein                                                                     | PTTG1IP         | 1,01 |
| zinc finger with KRAB and SCAN domains 7                                                                               | ZKSCAN7         | 1,01 |
| solute carrier family 4 (sodium bicarbonate cotransporter), member 4                                                   | SLC4A4          | 1,01 |
| glycine-N-acyltransferase-like 2                                                                                       | GLYATL2         | 1,01 |
| GDNF family receptor alpha 2                                                                                           | GFRA2           | 1,01 |
| potassium channel, voltage gated modifier subfamily G, member 1                                                        | KCNG1           | 1,01 |
| 2-oxoglutarate and iron-dependent oxygenase domain containing 3                                                        | OGFOD3          | 1,01 |
| lacritin                                                                                                               | LACRT           | 1,01 |
| zinc finger protein 846                                                                                                | ZNF846          | 1,01 |
| ArfGAP with dual PH domains 1                                                                                          | ADAP1           | 1,01 |
| fibronectin type III and SPRY domain containing 2                                                                      | FSD2            | 1,01 |
| Zhang2013 ALT_ACCEPTOR, ALT_DONOR, coding, INTERNAL, intronic best transcript NM_014675                                | CROCC           | 1,01 |
| IGF2 antisense RNA                                                                                                     | IGF2-AS         | 1,01 |
| K(lysine) acetyltransferase 2A                                                                                         | KAT2A           | 1,01 |
| single-pass membrane protein with coiled-coil domains 2                                                                | SMCO2           | 1,01 |
| interferon, lambda 2                                                                                                   | IFNL2           | 1,01 |
| peptidase (mitochondrial processing) alpha                                                                             | PMPCA           | 1,01 |
| natriuretic peptide C                                                                                                  | NPPC            | 1,01 |
| tubby like protein 1                                                                                                   | TULP1           | 1,01 |
| leucine rich repeat and fibronectin type III domain containing 3                                                       | LRFN3           | 1,01 |
| relaxin 3                                                                                                              | RLN3            | 1,01 |
| cilia and flagella associated protein 36                                                                               | CFAP36          | 1,01 |
| neuron specific gene family member 1; Neuron-specific protein family member 1 [Source:UniProtKB/Swiss-Prot;Acc:P42857] | NSG1; D4S234E   | 1,01 |
| SPT6 homolog, histone chaperone                                                                                        | SUPT6H          | 1,01 |
| replication factor C subunit 4                                                                                         | RFC4            | 1,01 |
| NADH dehydrogenase (ubiquinone) 1 alpha subcomplex, 10, 42kDa                                                          | NDUFA10         | 1,01 |
| polycystic kidney and hepatic disease 1 (autosomal recessive)                                                          | PKHD1           | 1,01 |

|                                                                                                                   |                   |      |
|-------------------------------------------------------------------------------------------------------------------|-------------------|------|
| wingless-type MMTV integration site family, member 7B                                                             | WNT7B             | 1,01 |
| TLR4 interactor with leucine-rich repeats                                                                         | TRIL              | 1,01 |
| snail family zinc finger 3                                                                                        | SNAI3             | 1,01 |
| hippocalcin like 4                                                                                                | HPCAL4            | 1,01 |
| cholinergic receptor, nicotinic beta 4                                                                            | CHRNA4            | 1,01 |
| lymphotoxin alpha                                                                                                 | LTA               | 1,01 |
| variable charge, X-linked 3B; variable charge, X-linked                                                           | VCX3B; VCX        | 1,01 |
| keratin associated protein 25-1                                                                                   | KRTAP25-1         | 1,01 |
| stomatin                                                                                                          | STOM              | 1,01 |
| acrosin                                                                                                           | ACR               | 1,01 |
| serpin peptidase inhibitor, clade B (ovalbumin), member 11 (gene/pseudogene)                                      | SERPINA11         | 1,01 |
| cystatin 8 (cystatin-related epididymal specific)                                                                 | CST8              | 1,01 |
| Memczak2013 ALT_ACCEPTOR, ALT_DONOR, coding, INTERNAL, intronic best transcript NM_015986                         | CRLF3             | 1,01 |
| fucosyltransferase 5 (alpha (1,3) fucosyltransferase)                                                             | FUT5              | 1,01 |
| ectonucleotide pyrophosphatase/phosphodiesterase 6                                                                | ENPP6             | 1,01 |
| ventral anterior homeobox 1                                                                                       | VAX1              | 1,01 |
| KN motif and ankyrin repeat domains 2                                                                             | KANK2             | 1,01 |
| guanosine monophosphate reductase                                                                                 | GMPTX             | 1,01 |
| PRAME family member 19                                                                                            | PRAMEF19          | 1,01 |
| RAD51L3-RFFL readthrough; HCG2039718, isoform CRA_g; Uncharacterized protein [Source:UniProtKB/TrEMBL;Acc:K7EN88] | RAD51L3-RFFL      | 1,01 |
| radial spoke head 10 homolog B2 (Chlamydomonas); radial spoke head 10 homolog B (Chlamydomonas)                   | RSPH10B2; RSPH10B | 1,01 |
| inositol polyphosphate-5-phosphatase D                                                                            | INPP5D            | 1,01 |
| tau tubulin kinase 1                                                                                              | TTBK1             | 1,01 |
| myotilin                                                                                                          | MYOT              | 1,01 |
| ADAMTS like 2                                                                                                     | ADAMTSL2          | 1,01 |
| potassium channel, voltage gated shaker related subfamily A, member 4                                             | KCNA4             | 1,01 |
| zinc finger protein 608                                                                                           | ZNF608            | 1,01 |
| INO80 complex subunit D                                                                                           | INO80D            | 1,01 |
| ribosomal protein L12                                                                                             | RPL12             | 1,01 |
| MAGE family member A5                                                                                             | MAGEA5            | 1,01 |
| MPL proto-oncogene, thrombopoietin receptor                                                                       | MPL               | 1,01 |
| ADP-ribosylation factor like GTPase 2                                                                             | ARL2              | 1,01 |
| keratin associated protein 9-9                                                                                    | KRTAP9-9          | 1,01 |
| nibrin                                                                                                            | NBN               | 1,01 |
| single immunoglobulin and toll-interleukin 1 receptor (TIR) domain                                                | SIGIRR            | 1,01 |
| transmembrane protein 176B                                                                                        | TMEM176B          | 1,01 |
| chromosome 7 open reading frame 77                                                                                | C7orf77           | 1,01 |



|                                                                                |                     |      |
|--------------------------------------------------------------------------------|---------------------|------|
| kallikrein related peptidase 14                                                | KLK14               | 1,01 |
| chordin-like 1                                                                 | CHRD1               | 1,01 |
| homeobox D9                                                                    | HOXD9               | 1,01 |
| coiled-coil glutamate rich protein 1                                           | CCER1               | 1,01 |
| archaelysin family metallopeptidase 1                                          | AMZ1                | 1,01 |
| mitochondrial ribosomal protein S16                                            | MRPS16              | 1,01 |
| reprimin-like                                                                  | RPRML               | 1,01 |
| CCR4-NOT transcription complex subunit 10                                      | CNOT10              | 1,01 |
| lipocalin-like 1                                                               | LCNL1               | 1,01 |
| cilia and flagella associated protein 52                                       | CFAP52              | 1,01 |
| S-antigen; retina and pineal gland (arrestin)                                  | SAG                 | 1,01 |
| CMT1A duplicated region transcript 15-like 2                                   | CDRT15L2            | 1,01 |
| microtubule associated protein 1 light chain 3 gamma                           | MAP1LC3C            | 1,01 |
| BPI fold containing family A, member 1                                         | BPIFA1              | 1,01 |
| small vasohibin binding protein                                                | SVBP                | 1,01 |
| general transcription factor IIIC subunit 2                                    | GTF3C2              | 1,01 |
| von Willebrand factor C domain containing 2                                    | VWC2                | 1,01 |
| SET and MYND domain containing 1                                               | SMYD1               | 1,01 |
| ephrin-B3                                                                      | EFNB3               | 1,01 |
| G protein-coupled receptor 156                                                 | GPR156              | 1,01 |
| trophoblast glycoprotein-like                                                  | TPBGL               | 1,01 |
| 2-oxoglutarate and iron-dependent oxygenase domain containing 1                | OGFOD1              | 1,01 |
| bone morphogenetic protein 3                                                   | BMP3                | 1,01 |
| neuroblastoma breakpoint family, member 26                                     | NBPF26              | 1,01 |
| ATPase, H <sup>+</sup> /K <sup>+</sup> exchanging, beta polypeptide            | ATP4B               | 1,01 |
| MAGE family member B17                                                         | MAGEB17             | 1,01 |
| DEAD (Asp-Glu-Ala-Asp) box polypeptide 49                                      | DDX49               | 1,01 |
| arachidonate 12-lipoxygenase                                                   | ALOX12              | 1,01 |
| amyloid beta (A4) precursor protein-binding, family A, member 1                | APBA1               | 1,01 |
| long intergenic non-protein coding RNA 1590; small integral membrane protein 8 | LINC01590;<br>SMIM8 | 1,01 |
| maestro heat-like repeat family member 9                                       | MROH9               | 1,01 |
| MT-RNR2-like 4                                                                 | MTRNR2L4            | 1,01 |
| potassium channel, two pore domain subfamily K, member 10                      | KCNK10              | 1,01 |
| PNN-interacting serine/arginine-rich protein                                   | PNISR               | 1,01 |
| zinc finger with KRAB and SCAN domains 7                                       | ZKSCAN7             | 1,01 |
| SPT20 homolog, SAGA complex component-like 2                                   | SUPT20HL2           | 1,01 |
| coiled-coil domain containing 166                                              | CCDC166             | 1,01 |
| dehydrogenase/reductase (SDR family) member 12                                 | DHRS12              | 1,01 |
| mitogen-activated protein kinase 15                                            | MAPK15              | 1,01 |
| calpain 6                                                                      | CAPN6               | 1,01 |
| tripartite motif containing 60                                                 | TRIM60              | 1,01 |

|                                                                                                              |                         |      |
|--------------------------------------------------------------------------------------------------------------|-------------------------|------|
| adenylate cyclase 4                                                                                          | ADCY4                   | 1,01 |
| ubiquitin specific peptidase 17-like family member 4                                                         | USP17L4                 | 1,01 |
| killer cell lectin-like receptor subfamily D, member 1                                                       | KLRD1                   | 1,01 |
| protein tyrosine phosphatase, receptor type, B                                                               | PTPRB                   | 1,01 |
| chromosome 1 open reading frame 95                                                                           | C1orf95                 | 1,01 |
| gamma-glutamyl hydrolase (conjugase, folylpolygammaglutamyl hydrolase)                                       | GGH                     | 1,01 |
| nuclear receptor coactivator 3                                                                               | NCOA3                   | 1,01 |
| thymic stromal lymphopoietin                                                                                 | TSLP                    | 1,01 |
| JMJD1C antisense RNA 1                                                                                       | JMJD1C-AS1              | 1,01 |
| regulatory factor X, 3 (influences HLA class II expression)                                                  | RFX3                    | 1,01 |
| pre-B lymphocyte 3                                                                                           | VPREB3                  | 1,01 |
| chymotrypsin-like elastase family, member 1                                                                  | CELA1                   | 1,01 |
| coiled-coil domain containing 17                                                                             | CCDC17                  | 1,01 |
| chemokine (C-C motif) ligand 4-like 2; chemokine (C-C motif) ligand 4; chemokine (C-C motif) ligand 4-like 1 | CCL4L2; CCL4;<br>CCL4L1 | 1,01 |
| N-acetyltransferase 8B (GCN5-related, putative, gene/pseudogene)                                             | NAT8B                   | 1,01 |
| X-linked Kx blood group related 7                                                                            | XKR7                    | 1,01 |
| topoisomerase I binding, arginine/serine-rich, E3 ubiquitin protein ligase                                   | TOPORS                  | 1,01 |
| mediator complex subunit 27                                                                                  | MED27                   | 1,01 |
| ADAM metallopeptidase domain 7                                                                               | ADAM7                   | 1,01 |
| olfactory receptor, family 5, subfamily P, member 2                                                          | OR5P2                   | 1,01 |
| cannabinoid receptor interacting protein 1                                                                   | CNRIP1                  | 1,01 |
| mediator complex subunit 25; microRNA 6800                                                                   | MED25; MIR6800          | 1,01 |
| Memczak2013 ANTISENSE, coding, INTERNAL, UTR3 best transcript NM_001428                                      | ENO1                    | 1,01 |
| dual oxidase 2                                                                                               | DUOX2                   | 1,01 |
| chromosome 16 open reading frame 90                                                                          | C16orf90                | 1,01 |
| seizure related 6 homolog (mouse)-like 2                                                                     | SEZ6L2                  | 1,01 |
| PARK2 co-regulated like                                                                                      | PACRGL                  | 1,01 |
| ring finger protein 152                                                                                      | RNF152                  | 1,01 |
| IQ motif containing F6                                                                                       | IQCF6                   | 1,01 |
| chromosome 11 open reading frame 65                                                                          | C11orf65                | 1,01 |
| MAGE family member B3                                                                                        | MAGEB3                  | 1,01 |
| zinc finger and BTB domain containing 45                                                                     | ZBTB45                  | 1,01 |
| SLIT and NTRK-like family, member 5                                                                          | SLITRK5                 | 1,01 |
| branched chain amino-acid transaminase 2, mitochondrial                                                      | BCAT2                   | 1,01 |
| Memczak2013 ANTISENSE, CDS, coding, upstream_start, UTR3, UTR5 best transcript NM_003523                     | HIST1H2BE               | 1,01 |
| catenin, beta like 1                                                                                         | CTNNBL1                 | 1,01 |

|                                                                                           |                |      |
|-------------------------------------------------------------------------------------------|----------------|------|
| lipoma HMGIC fusion partner                                                               | LHFP           | 1,01 |
| synaptosome associated protein 47kDa                                                      | SNAP47         | 1,01 |
| chromosome 9 open reading frame 173                                                       | C9orf173       | 1,01 |
| zinc finger protein 251                                                                   | ZNF251         | 1,01 |
| glyoxylate reductase 1 homolog (Arabidopsis)                                              | GLYR1          | 1,01 |
| chromosome 2 open reading frame 71                                                        | C2orf71        | 1,01 |
| signal recognition particle 54kDa                                                         | SRP54          | 1,01 |
| adhesion G protein-coupled receptor L3                                                    | ADGRL3         | 1,01 |
| zinc finger protein 502                                                                   | ZNF502         | 1,01 |
| family with sequence similarity 47, member C                                              | FAM47C         | 1,01 |
| coagulation factor XIII, A1 polypeptide                                                   | F13A1          | 1,01 |
| serine/threonine kinase-like domain containing 1<br>[Source:HGNC Symbol;Acc:HGNC:28669]   | STKLD1         | 1,01 |
| disrupted in renal carcinoma 1                                                            | DIRC1          | 1,01 |
| gap junction protein alpha 10                                                             | GJA10          | 1,01 |
| tudor domain containing 12                                                                | TDRD12         | 1,01 |
| RNA binding motif protein 7                                                               | RBM7           | 1,01 |
| olfactory receptor, family 52, subfamily W, member 1                                      | OR52W1         | 1,01 |
| glutamate receptor, ionotropic, kainate 3                                                 | GRIK3          | 1,01 |
| cancer/testis antigen 55                                                                  | CT55           | 1,01 |
| testis expressed 9                                                                        | TEX9           | 1,01 |
| Jeck2013 ANTISENSE, coding, INTERNAL, intronic best<br>transcript NM_016263               | FZR1           | 1,01 |
| adenylosuccinate synthase                                                                 | ADSS           | 1,01 |
| chromosome 19 open reading frame 44                                                       | C19orf44       | 1,01 |
| tetratricopeptide repeat domain 25                                                        | TTC25          | 1,01 |
| calcium channel flower domain containing 1                                                | CACFD1         | 1,01 |
| forkhead box P4; microRNA 4641                                                            | FOXP4; MIR4641 | 1,01 |
| purinergic receptor P2X, ligand gated ion channel, 6                                      | P2RX6          | 1,01 |
| coiled-coil-helix-coiled-coil-helix domain containing 3                                   | CHCHD3         | 1,01 |
| ribosomal protein S25                                                                     | RPS25          | 1,01 |
| LY6/PLAUR domain containing 2                                                             | LYPD2          | 1,01 |
| Jeck2013 ALT_ACCEPTOR, ALT_DONOR, coding,<br>INTERNAL, intronic best transcript NM_152900 | MAGI3          | 1,01 |
| Memczak2013 ANTISENSE, CDS, coding, INTERNAL,<br>intronic best transcript NM_001077401    | ACVRL1         | 1,01 |
| fatty acid amide hydrolase                                                                | FAAH           | 1,01 |
| tRNA-yW synthesizing protein 1 homolog (S. cerevisiae)                                    | TYW1           | 1,01 |
| spindlin family, member 4                                                                 | SPIN4          | 1,01 |
| vitelline membrane outer layer 1 homolog (chicken)                                        | VMO1           | 1,01 |
| coiled-coil domain containing 102B                                                        | CCDC102B       | 1,01 |
| myosin light chain 1                                                                      | MYL1           | 1,01 |
| cysteine-rich secretory protein 3                                                         | CRISP3         | 1,01 |
| cadherin 18, type 2                                                                       | CDH18          | 1,01 |
| NOP2/Sun domain family, member 7                                                          | NSUN7          | 1,01 |

|                                                                                                           |                          |      |
|-----------------------------------------------------------------------------------------------------------|--------------------------|------|
| chromosome 11 open reading frame 40                                                                       | C11orf40                 | 1,01 |
| uncharacterized LOC389199; Transcript Identified by AceView, Entrez Gene ID(s) 389199; novel transcript   | LOC389199;<br>AC097381.1 | 1,01 |
| periaxin                                                                                                  | PRX                      | 1,01 |
| topoisomerase (DNA) II binding protein 1                                                                  | TOPBP1                   | 1,01 |
| lumican                                                                                                   | LUM                      | 1,01 |
| transmembrane epididymal protein 1                                                                        | TEDDM1                   | 1,01 |
| testis and ovary specific PAZ domain containing 1                                                         | TOPAZ1                   | 1,01 |
| fumarylacetoacetate hydrolase domain containing 2A                                                        | FAHD2A                   | 1,01 |
| HOP homeobox                                                                                              | HOPX                     | 1,01 |
| ubiquitin-conjugating enzyme E2U (putative)                                                               | UBE2U                    | 1,01 |
| zinc finger, BED-type containing 5                                                                        | ZBED5                    | 1,01 |
| La ribonucleoprotein domain family, member 1                                                              | LARP1                    | 1,01 |
| Yes-associated protein 1                                                                                  | YAP1                     | 1,01 |
| olfactory receptor, family 2, subfamily B, member 3                                                       | OR2B3                    | 1,01 |
| solute carrier family 34 (type II sodium/phosphate cotransporter), member 1                               | SLC34A1                  | 1,01 |
| glycine-N-acyltransferase-like 1                                                                          | GLYATL1                  | 1,01 |
| transient receptor potential cation channel, subfamily M, member 7                                        | TRPM7                    | 1,01 |
| G1 to S phase transition 1                                                                                | GSPT1                    | 1,01 |
| nucleolar protein 4                                                                                       | NOL4                     | 1,01 |
| harbinger transposase derived 1                                                                           | HARBI1                   | 1,01 |
| carboxymethylenebutenolidase homolog (Pseudomonas)                                                        | CMBL                     | 1,01 |
| GVQW motif containing 2                                                                                   | GVQW2                    | 1,01 |
| very low density lipoprotein receptor                                                                     | VLDLR                    | 1,01 |
| Transcript Identified by AceView, Entrez Gene ID(s) 23126                                                 | POGZ                     | 1,01 |
| coiled-coil domain containing 18                                                                          | CCDC18                   | 1,01 |
| stearoyl-CoA desaturase 5                                                                                 | SCD5                     | 1,01 |
| dynein, axonemal, heavy chain 2                                                                           | DNAH2                    | 1,01 |
| zinc finger protein 691                                                                                   | ZNF691                   | 1,01 |
| polo-like kinase 5                                                                                        | PLK5                     | 1,01 |
| BTG3 associated nuclear protein                                                                           | BANP                     | 1,01 |
| Zhang2013 ALT_ACCEPTOR, ALT_DONOR, coding, INTERNAL, intronic best transcript NM_052909                   | PLEKHG4B                 | 1,01 |
| LINE-1 type transposase domain containing 1                                                               | L1TD1                    | 1,01 |
| engulfment and cell motility 3                                                                            | ELMO3                    | 1,01 |
| zinc finger protein 544                                                                                   | ZNF544                   | 1,01 |
| Transcript Identified by AceView, Entrez Gene ID(s) 84954; novel transcript, antisense to STAP2           | AC007292.7;<br>MPND      | 1,01 |
| protein tyrosine phosphatase, receptor type, f polypeptide (PTPRF), interacting protein (liprin), alpha 2 | PPFIA2                   | 1,01 |
| cyclin-dependent kinase 2 associated protein 2                                                            | CDK2AP2                  | 1,00 |

|                                                                  |            |      |
|------------------------------------------------------------------|------------|------|
| poliovirus receptor related immunoglobulin domain containing     | PVRIG      | 1,00 |
| WW domain binding protein 1                                      | WBP1       | 1,00 |
| olfactory receptor, family 11, subfamily H, member 2             | OR11H2     | 1,00 |
| chromosome 9 open reading frame 106                              | C9orf106   | 1,00 |
| neurexophilin and PC-esterase domain family, member 4            | NXPE4      | 1,00 |
| proline rich 23B                                                 | PRR23B     | 1,00 |
| sodium channel, non voltage gated 1 beta subunit                 | SCNN1B     | 1,00 |
| receptor (TNFRSF)-interacting serine-threonine kinase 1          | RIPK1      | 1,00 |
| olfactory receptor, family 10, subfamily G, member 2             | OR10G2     | 1,00 |
| keratin associated protein 9-3                                   | KRTAP9-3   | 1,00 |
| solute carrier family 5 (sodium/sugar cotransporter), member 10  | SLC5A10    | 1,00 |
| solute carrier family 16 (monocarboxylate transporter), member 1 | SLC16A1    | 1,00 |
| small nuclear ribonucleoprotein polypeptide B                    | SNRPB2     | 1,00 |
| arrestin domain containing 5                                     | ARRDC5     | 1,00 |
| olfactory receptor, family 2, subfamily D, member 2              | OR2D2      | 1,00 |
| SMAD family member 5                                             | SMAD5      | 1,00 |
| DnaJ (Hsp40) homolog, subfamily B, member 13                     | DNAJB13    | 1,00 |
| guanylate binding protein 2, interferon-inducible                | GBP2       | 1,00 |
| lysozyme-like 2                                                  | LYZL2      | 1,00 |
| AF4/FMR2 family, member 3                                        | AFF3       | 1,00 |
| transmembrane protein 155                                        | TMEM155    | 1,00 |
| transmembrane protein 115                                        | TMEM115    | 1,00 |
| inositol polyphosphate-5-phosphatase D                           | INPP5D     | 1,00 |
| DIM1 dimethyladenosine transferase 1 homolog                     | DIMT1      | 1,00 |
| receptor (chemosensory) transporter protein 2                    | RTP2       | 1,00 |
| tumor protein p53 regulated apoptosis inducing protein 1         | TP53AIP1   | 1,00 |
| Transcript Identified by AceView, Entrez Gene ID(s) 9045         | RPL14      | 1,00 |
| leucine rich repeat and fibronectin type III domain containing 1 | LRFN1      | 1,00 |
| ISY1-RAB43 readthrough                                           | ISY1-RAB43 | 1,00 |
| sterile alpha motif domain containing 11                         | SAMD11     | 1,00 |
| Transcript Identified by AceView, Entrez Gene ID(s) 51752        | ERAP1      | 1,00 |
| zinc finger protein 195                                          | ZNF195     | 1,00 |
| parkin RBR E3 ubiquitin protein ligase                           | PARK2      | 1,00 |
| glutamate rich 4                                                 | ERICH4     | 1,00 |
| somatostatin receptor 5                                          | SSTR5      | 1,00 |
| YTH N(6)-methyladenosine RNA binding protein 2                   | YTHDF2     | 1,00 |
| TRAF family member-associated NFKB activator                     | TANK       | 1,00 |

|                                                                                              |          |      |
|----------------------------------------------------------------------------------------------|----------|------|
| lectin, galactoside-binding, soluble, 13                                                     | LGALS13  | 1,00 |
| cilia and flagella associated protein 69                                                     | CFAP69   | 1,00 |
| Memczak2013 ANTISENSE, coding, INTERNAL, UTR3 best transcript NM_005188                      | CBL      | 1,00 |
| olfactory receptor, family 6, subfamily Q, member 1 (gene/pseudogene)                        | OR6Q1    | 1,00 |
| chromosome 10 open reading frame 95                                                          | C10orf95 | 1,00 |
| olfactory receptor, family 1, subfamily D, member 5                                          | OR1D5    | 1,00 |
| ILK associated serine/threonine phosphatase                                                  | ILKAP    | 1,00 |
| diacylglycerol kinase, delta 130kDa                                                          | DGKD     | 1,00 |
| serine/threonine kinase-like domain containing 1 [Source:HGNC Symbol;Acc:HGNC:28669]         | STKLD1   | 1,00 |
| NME/NM23 family member 5                                                                     | NME5     | 1,00 |
| chondroitin sulfate proteoglycan 4 pseudogene 1, Y-linked                                    | CSPG4P1Y | 1,00 |
| CTR9 homolog, Paf1/RNA polymerase II complex component                                       | CTR9     | 1,00 |
| tumor protein p63 regulated 1                                                                | TPRG1    | 1,00 |
| ADAM metallopeptidase with thrombospondin type 1 motif 15                                    | ADAMTS15 | 1,00 |
| hydroxysteroid (17-beta) dehydrogenase 1                                                     | HSD17B1  | 1,00 |
| chymotrypsin-like elastase family, member 3B                                                 | CELA3B   | 1,00 |
| TNF receptor-associated factor 3 interacting protein 1                                       | TRAF3IP1 | 1,00 |
| acrosin binding protein                                                                      | ACRBP    | 1,00 |
| Memczak2013 ALT_ACCEPTOR, ALT_DONOR, coding, INTERNAL, intronic best transcript NM_001172639 | CELF1    | 1,00 |
| transcription factor 3                                                                       | TCF3     | 1,00 |
| absent in melanoma 1-like                                                                    | AIM1L    | 1,00 |
| zinc finger protein 716                                                                      | ZNF716   | 1,00 |
| heterogeneous nuclear ribonucleoprotein C (C1/C2)                                            | HNRNPC   | 1,00 |
| olfactory receptor, family 2, subfamily AG, member 1 (gene/pseudogene)                       | OR2AG1   | 1,00 |
| CLK4-associating serine/arginine rich protein                                                | CLASRP   | 1,00 |
| zinc finger protein 175                                                                      | ZNF175   | 1,00 |
| S100 calcium binding protein A7A                                                             | S100A7A  | 1,00 |
| NANOG neighbor homeobox                                                                      | NANOGNB  | 1,00 |
| sphingosine-1-phosphate receptor 2                                                           | S1PR2    | 1,00 |
| family with sequence similarity 132, member B                                                | FAM132B  | 1,00 |
| HRAS-like suppressor 2                                                                       | HRASLS2  | 1,00 |
| DEAD (Asp-Glu-Ala-Asp) box polypeptide 43                                                    | DDX43    | 1,00 |
| zinc finger, DHHC-type containing 3                                                          | ZDHHC3   | 1,00 |
| solute carrier family 43, member 3                                                           | SLC43A3  | 1,00 |
| ribosomal protein L38                                                                        | RPL38    | 1,00 |
| interleukin 1 receptor-like 2                                                                | IL1RL2   | 1,00 |
| visual system homeobox 2                                                                     | VSX2     | 1,00 |

|                                                                               |                               |      |
|-------------------------------------------------------------------------------|-------------------------------|------|
| coiled-coil domain containing 28B                                             | CCDC28B                       | 1,00 |
| long intergenic non-protein coding RNA 272                                    | LINC00272                     | 1,00 |
| Transcript Identified by AceView, Entrez Gene ID(s) 8220                      | DGCR14                        | 1,00 |
| mitochondrial ribosomal protein S28                                           | MRPS28                        | 1,00 |
| solute carrier family 25, member 41                                           | SLC25A41                      | 1,00 |
| claudin 9                                                                     | CLDN9                         | 1,00 |
| Transcript Identified by AceView, Entrez Gene ID(s) 11193                     | WBP4                          | 1,00 |
| Transcript Identified by AceView, Entrez Gene ID(s) 153572                    | IRX2                          | 1,00 |
| intraflagellar transport 52                                                   | IFT52                         | 1,00 |
| kinesin family member 26B                                                     | KIF26B                        | 1,00 |
| BTB (POZ) domain containing 16                                                | BTBD16                        | 1,00 |
| interleukin 11 receptor, alpha                                                | IL11RA                        | 1,00 |
| DEAH (Asp-Glu-Ala-His) box polypeptide 40                                     | DHX40                         | 1,00 |
| mitochondrial ribosomal protein S23                                           | MRPS23                        | 1,00 |
| integrin beta 1 binding protein 1                                             | ITGB1BP1                      | 1,00 |
| chymotrypsin-like                                                             | CTRL                          | 1,00 |
| endogenous Bornavirus-like nucleoprotein 2                                    | EBLN2                         | 1,00 |
| BPI fold containing family A, member 2                                        | BPIFA2                        | 1,00 |
| defensin, alpha 1B; defensin, alpha 1; defensin, alpha 3, neutrophil-specific | DEFA1B; DEFA1; DEFA3          | 1,00 |
| defensin, alpha 1; defensin, alpha 1B                                         | DEFA1; DEFA1B                 | 1,00 |
| carnosine synthase 1                                                          | CARNS1                        | 1,00 |
| zinc finger protein 91                                                        | ZNF91                         | 1,00 |
| purinergic receptor P2Y, G-protein coupled, 14                                | P2RY14                        | 1,00 |
| general transcription factor IIA 1-like; STON1-GTF2A1L readthrough; stonin 1  | GTF2A1L; STON1-GTF2A1L; STON1 | 1,00 |
| immunoresponsive 1 homolog (mouse)                                            | IRG1                          | 1,00 |
| neuropeptides B/W receptor 2                                                  | NPBWR2                        | 1,00 |
| fibroblast growth factor 23                                                   | FGF23                         | 1,00 |
| EF-hand calcium binding domain 8                                              | EFCAB8                        | 1,00 |
| ATP binding cassette subfamily B member 1                                     | ABCB1                         | 1,00 |
| PIK3CD antisense RNA 2                                                        | PIK3CD-AS2                    | 1,00 |
| tumor necrosis factor (ligand) superfamily, member 11                         | TNFSF11                       | 1,00 |
| laminin, gamma 3                                                              | LAMC3                         | 1,00 |
| forkhead box E1                                                               | FOXE1                         | 1,00 |
| toll-like receptor 7                                                          | TLR7                          | 1,00 |
| pleckstrin and Sec7 domain containing                                         | PSD                           | 1,00 |
| hydroxymethylbilane synthase                                                  | HMBS                          | 1,00 |
| valyl-tRNA synthetase                                                         | VAR5                          | 1,00 |
| IGF like family receptor 1                                                    | IGFLR1                        | 1,00 |
| solute carrier family 4, sodium bicarbonate transporter, member 10            | SLC4A10                       | 1,00 |

|                                                                                         |                       |      |
|-----------------------------------------------------------------------------------------|-----------------------|------|
| dynamin 3                                                                               | DNM3                  | 1,00 |
| TOR signaling pathway regulator                                                         | TIPRL                 | 1,00 |
| mitochondrial transcription termination factor 4                                        | MTERF4                | 1,00 |
| relaxin/insulin-like family peptide receptor 1                                          | RXFP1                 | 1,00 |
| NAD kinase                                                                              | NADK                  | 1,00 |
| heterogeneous nuclear ribonucleoprotein C-like 3<br>[Source:HGNC Symbol;Acc:HGNC:51235] | HNRNPCL3              | 1,00 |
| leucine rich repeat transmembrane neuronal 3                                            | LRRTM3                | 1,00 |
| adhesion G protein-coupled receptor A1                                                  | ADGRA1                | 1,00 |
| major histocompatibility complex, class II, DR beta 1                                   | HLA-DRB1              | 1,00 |
| MAGE family member C1                                                                   | MAGEC1                | 1,00 |
| methyltransferase like 18                                                               | METTL18               | 1,00 |
| EPH receptor B1                                                                         | EPHB1                 | 1,00 |
| matrix metalloproteinase 27                                                             | MMP27                 | 1,00 |
| clarin 2                                                                                | CLRN2                 | 1,00 |
| RNA binding motif protein 15B                                                           | RBM15B                | 1,00 |
| IQ motif containing F5                                                                  | IQCF5                 | 1,00 |
| cardiomyopathy associated 5                                                             | CMYA5                 | 1,00 |
| NK2 homeobox 8                                                                          | NKX2-8                | 1,00 |
| LYR motif containing 9                                                                  | LYRM9                 | 1,00 |
| family with sequence similarity 129, member C                                           | FAM129C               | 1,00 |
| ADP-ribosylation factor 1; microRNA 3620                                                | ARF1; MIR3620         | 1,00 |
| listerin E3 ubiquitin protein ligase 1                                                  | LTN1                  | 1,00 |
| cartilage intermediate layer protein 2                                                  | CILP2                 | 1,00 |
| aldo-keto reductase family 1, member C2                                                 | AKR1C2                | 1,00 |
| protein phosphatase 6, regulatory subunit 3                                             | PPP6R3                | 1,00 |
| testis expressed 12                                                                     | TEX12                 | 1,00 |
| Transcript Identified by AceView, Entrez Gene ID(s) 91782                               | CHMP7                 | 1,00 |
| olfactory receptor, family 52, subfamily B, member 2                                    | OR52B2                | 1,00 |
| defensin, beta 107B; defensin, beta 107A                                                | DEFB107B;<br>DEFB107A | 1,00 |
| mutL homolog 3                                                                          | MLH3                  | 1,00 |
| TBC1 domain family, member 3L; TBC1 domain family,<br>member 3E                         | TBC1D3L;<br>TBC1D3E   | 1,00 |
| guanylate binding protein 4                                                             | GBP4                  | 1,00 |
| endonuclease/exonuclease/phosphatase family domain<br>containing 1                      | EEPD1                 | 1,00 |
| testis expressed 40                                                                     | TEX40                 | 1,00 |
| LGALS8 antisense RNA 1                                                                  | LGALS8-AS1            | 1,00 |
| CD6 molecule                                                                            | CD6                   | 1,00 |
| maestro                                                                                 | MRO                   | 1,00 |
| guanylate binding protein family, member 6                                              | GBP6                  | 1,00 |
| EDAR-associated death domain                                                            | EDARADD               | 1,00 |
| chondroitin sulfate proteoglycan 5 (neuroglycan C)                                      | CSPG5                 | 1,00 |



|                                                                                                                                       |                          |      |
|---------------------------------------------------------------------------------------------------------------------------------------|--------------------------|------|
| RAB6C-like; Synthetic construct Homo sapiens clone IMAGE:100016523, MGC:184337 RAB6C-like (LOC150786) mRNA, encodes complete protein. | WTH3DI;<br>LOC150786     | 1,00 |
| glycine receptor beta                                                                                                                 | GLRB                     | 1,00 |
| forkhead box F2                                                                                                                       | FOXF2                    | 1,00 |
| chemokine (C-C motif) receptor 8                                                                                                      | CCR8                     | 1,00 |
| peptidyl arginine deiminase, type IV                                                                                                  | PADI4                    | 1,00 |
| pleckstrin homology domain interacting protein                                                                                        | PHIP                     | 1,00 |
| methyltransferase like 16                                                                                                             | METTTL16                 | 1,00 |
| Jeck2013 ALT_ACCEPTOR, ALT_DONOR, coding, INTERNAL, intronic best transcript NM_002737                                                | PRKCA                    | 1,00 |
| prickle homolog 3                                                                                                                     | PRICKLE3                 | 1,00 |
| uncharacterized LOC400553; novel transcript                                                                                           | LOC400553; RP11-863P13.4 | 1,00 |
| natural killer cell granule protein 7                                                                                                 | NKG7                     | 1,00 |
| nucleoredoxin-like 1                                                                                                                  | NXNL1                    | 1,00 |
| family with sequence similarity 111, member B                                                                                         | FAM111B                  | 1,00 |
| MORC family CW-type zinc finger 1                                                                                                     | MORC1                    | 1,00 |
| potassium channel, two pore domain subfamily K, member 4                                                                              | KCNK4                    | 1,00 |
| phosphatidylinositol glycan anchor biosynthesis class W                                                                               | PIGW                     | 1,00 |
| LSM2 homolog, U6 small nuclear RNA and mRNA degradation associated                                                                    | LSM2                     | 1,00 |
| cilia and flagella associated protein 206                                                                                             | CFAP206                  | 1,00 |
| defensin, beta 109, pseudogene 1B                                                                                                     | DEFB109P1B               | 1,00 |
| zinc finger, DHHC-type containing 3                                                                                                   | ZDHHC3                   | 1,00 |
| synaptotagmin VI                                                                                                                      | SYT6                     | 1,00 |
| limbic system-associated membrane protein                                                                                             | LSAMP                    | 1,00 |
| NADPH oxidase, EF-hand calcium binding domain 5; sperm equatorial segment protein 1                                                   | NOX5; SPESP1             | 1,00 |
| TBC1 domain containing kinase                                                                                                         | TBCK                     | 1,00 |
| leucine rich repeat containing 63                                                                                                     | LRRC63                   | 1,00 |
| pre-B-cell leukemia homeobox 1                                                                                                        | PBX1                     | 1,00 |
| DMRT-like family A2                                                                                                                   | DMRTA2                   | 1,00 |
| K(lysine) acetyltransferase 6A                                                                                                        | KAT6A                    | 1,00 |
| zinc finger protein 708                                                                                                               | ZNF708                   | 1,00 |
| midline 2                                                                                                                             | MID2                     | 1,00 |
| Transcript Identified by AceView, Entrez Gene ID(s) 123016                                                                            | TTC8                     | 1,00 |
| keratin associated protein 15-1                                                                                                       | KRTAP15-1                | 1,00 |
| mediator complex subunit 19                                                                                                           | MED19                    | 1,00 |
| activating transcription factor 1                                                                                                     | ATF1                     | 1,00 |
| major facilitator superfamily domain containing 2B                                                                                    | MFSD2B                   | 1,00 |
| testis expressed 101                                                                                                                  | TEX101                   | 1,00 |
| claudin 17                                                                                                                            | CLDN17                   | 1,00 |

|                                                                                           |           |      |
|-------------------------------------------------------------------------------------------|-----------|------|
| kelch-like family member 41                                                               | KLHL41    | 1,00 |
| esterase D                                                                                | ESD       | 1,00 |
| Zhang2013 ALT_DONOR, coding, INTERNAL, intronic best transcript NM_001006                 | RPS3A     | 1,00 |
| chromosome 10 open reading frame 142                                                      | C10orf142 | 1,00 |
| ABL proto-oncogene 1, non-receptor tyrosine kinase                                        | ABL1      | 1,00 |
| paraneoplastic Ma antigen family member 6A                                                | PNMA6A    | 1,00 |
| chloride channel, voltage-sensitive 1                                                     | CLCN1     | 1,00 |
| transmembrane protein 125                                                                 | TMEM125   | 1,00 |
| GTP-binding protein 8 (putative)                                                          | GTPBP8    | 1,00 |
| testis specific protein, Y-linked 10                                                      | TSPY10    | 1,00 |
| A kinase (PRKA) anchor protein 4                                                          | AKAP4     | 1,00 |
| sarcoglycan delta                                                                         | SGCD      | 1,00 |
| Memczak2013 ANTISENSE, CDS, coding, INTERNAL best transcript NM_020979                    | SH2B2     | 1,00 |
| cytochrome P450, family 4, subfamily B, polypeptide 1                                     | CYP4B1    | 1,00 |
| Transcript Identified by AceView, Entrez Gene ID(s) 11273                                 | ATXN2L    | 1,00 |
| lipocalin 10                                                                              | LCN10     | 1,00 |
| leucine rich repeat containing 3C                                                         | LRRC3C    | 1,00 |
| zinc finger, CW type with PWWP domain 1                                                   | ZCWPW1    | 1,00 |
| homeobox A4                                                                               | HOXA4     | 1,00 |
| fibronectin type III and ankyrin repeat domains 1                                         | FANK1     | 1,00 |
| Memczak2013 ALT_ACCEPTOR, ALT_DONOR, coding, INTERNAL, intronic best transcript NM_015130 | TBC1D9    | 1,00 |
| olfactory receptor, family 52, subfamily E, member 8                                      | OR52E8    | 1,00 |
| golgi-associated, olfactory signaling regulator                                           | GFY       | 1,00 |
| Transcript Identified by AceView, Entrez Gene ID(s) 5992                                  | RFX4      | 1,00 |
| myomesin 2                                                                                | MYOM2     | 1,00 |
| tetratricopeptide repeat domain 16                                                        | TTC16     | 1,00 |
| peptidase M20 domain containing 1                                                         | PM20D1    | 1,00 |
| mitogen-activated protein kinase kinase kinase 15                                         | MAP3K15   | 1,00 |
| HBS1-like translational GTPase                                                            | HBS1L     | 1,00 |
| NK6 homeobox 3                                                                            | NKX6-3    | 1,00 |
| olfactory receptor, family 1, subfamily D, member 2                                       | OR1D2     | 1,00 |
| chromodomain helicase DNA binding protein 5                                               | CHD5      | 1,00 |
| Memczak2013 ANTISENSE, CDS, coding, INTERNAL best transcript NM_002265                    | KPNB1     | 1,00 |
| inositol polyphosphate-5-phosphatase B                                                    | INPP5B    | 1,00 |
| long intergenic non-protein coding RNA 311                                                | LINC00311 | 1,00 |
| retinoic acid receptor responder (tazarotene induced) 3                                   | RARRES3   | 1,00 |
| methionine adenosyltransferase II, beta                                                   | MAT2B     | 1,00 |
| WD repeat domain 49                                                                       | WDR49     | 1,00 |
| prostate and testis expressed 2                                                           | PATE2     | 1,00 |

|                                                                                           |                |      |
|-------------------------------------------------------------------------------------------|----------------|------|
| leucine rich repeat containing 40                                                         | LRRC40         | 1,00 |
| succinate receptor 1                                                                      | SUCNR1         | 1,00 |
| tRNA methyltransferase 13 homolog (S. cerevisiae)                                         | TRMT13         | 1,00 |
| ADP-ribosylation factor like GTPase 10                                                    | ARL10          | 1,00 |
| ciliogenesis associated TTC17 interacting protein                                         | CATIP          | 1,00 |
| nicotinamide nucleotide transhydrogenase                                                  | NNT            | 1,00 |
| HERV-H LTR-associating 1                                                                  | HLA1           | 1,00 |
| RAB11 family interacting protein 2 (class I)                                              | RAB11FIP2      | 1,00 |
| Transcript Identified by AceView, Entrez Gene ID(s) 79677                                 | SMC6           | 1,00 |
| acyl-CoA binding domain containing 6                                                      | ACBD6          | 1,00 |
| TIMELESS interacting protein; ribosomal protein L9 pseudogene 25                          | TIPIN; RPL9P25 | 1,00 |
| catenin (cadherin-associated protein), alpha 2                                            | CTNNA2         | 1,00 |
| IKAROS family zinc finger 4                                                               | IKZF4          | 1,00 |
| AhpC/TSA antioxidant enzyme domain containing 1                                           | AAED1          | 1,00 |
| Purkinje cell protein 4                                                                   | PCP4           | 1,00 |
| complement factor H                                                                       | CFH            | 1,00 |
| ribosomal protein L41                                                                     | RPL41          | 1,00 |
| family with sequence similarity 179, member A                                             | FAM179A        | 1,00 |
| keratin 4, type II                                                                        | KRT4           | 1,00 |
| metastasis associated in colon cancer 1                                                   | MACC1          | 1,00 |
| G protein-coupled receptor 85                                                             | GPR85          | 1,00 |
| DAN domain family member 5, BMP antagonist                                                | DAND5          | 1,00 |
| tripartite motif containing 46                                                            | TRIM46         | 1,00 |
| tigger transposable element derived 5                                                     | TIGD5          | 1,00 |
| small proline-rich protein 1B                                                             | SPRR1B         | 1,00 |
| phospholipid phosphatase 7 (inactive)                                                     | PLPP7          | 1,00 |
| ATP binding cassette subfamily A member 5                                                 | ABCA5          | 1,00 |
| calcium channel, voltage-dependent, gamma subunit 4                                       | CACNG4         | 1,00 |
| ribulose-5-phosphate-3-epimerase                                                          | RPE            | 1,00 |
| Memczak2013 ALT_ACCEPTOR, ALT_DONOR, coding, INTERNAL, intronic best transcript NM_017931 | TTC38          | 1,00 |
| coiled-coil domain containing 149                                                         | CCDC149        | 1,00 |
| contactin associated protein-like 4                                                       | CNTNAP4        | 1,00 |
| polycystic kidney disease 2-like 2                                                        | PKD2L2         | 1,00 |
| KIAA1210                                                                                  | KIAA1210       | 1,00 |
| EF-hand and coiled-coil domain containing 1                                               | EFCC1          | 1,00 |
| neuroblastoma RAS viral (v-ras) oncogene homolog                                          | NRAS           | 1,00 |
| gamma-aminobutyric acid (GABA) A receptor, gamma 2                                        | GABRG2         | 1,00 |
| suppressor APC domain containing 2                                                        | SAPCD2         | 1,00 |
| neurotrophic tyrosine kinase, receptor, type 1                                            | NTRK1          | 1,00 |
| Transcript Identified by AceView, Entrez Gene ID(s) 5604                                  | MAP2K1         | 1,00 |

|                                                                                                                                                  |                                          |      |
|--------------------------------------------------------------------------------------------------------------------------------------------------|------------------------------------------|------|
| hypocretin (orexin) receptor 1                                                                                                                   | HCRT1                                    | 1,00 |
| LEM domain containing 1                                                                                                                          | LEMD1                                    | 1,00 |
| follicle stimulating hormone receptor                                                                                                            | FSHR                                     | 1,00 |
| peptidyl arginine deiminase, type VI                                                                                                             | PADI6                                    | 1,00 |
| olfactory receptor, family 4, subfamily S, member 2                                                                                              | OR4S2                                    | 1,00 |
| Memczak2013 ANTISENSE, CDS, coding, INTERNAL best transcript NM_014931                                                                           | PPP6R1                                   | 1,00 |
| SRY box 30                                                                                                                                       | SOX30                                    | 1,00 |
| Transcript Identified by AceView, Entrez Gene ID(s) 150590; 51601; 51263; chromosome 2 open reading frame 15 [Source:HGNC Symbol;Acc:HGNC:28436] | C2orf15andLIPT1a<br>ndMRPL30;<br>C2orf15 | 1,00 |
| immunoglobulin superfamily, member 6                                                                                                             | IGSF6                                    | 1,00 |
| crystallin beta B1                                                                                                                               | CRYBB1                                   | 1,00 |
| long intergenic non-protein coding RNA 303                                                                                                       | LINC00303                                | 1,00 |
| notch 1                                                                                                                                          | NOTCH1                                   | 1,00 |
| riboflavin kinase                                                                                                                                | RFK                                      | 1,00 |
| ADAM metallopeptidase domain 23                                                                                                                  | ADAM23                                   | 1,00 |
| MKRN2 opposite strand                                                                                                                            | MKRN2OS                                  | 1,00 |
| folliculogenesis specific bHLH transcription factor                                                                                              | FIGLA                                    | 1,00 |
| serine peptidase inhibitor, Kazal type 6                                                                                                         | SPINK6                                   | 1,00 |
| diacylglycerol kinase, beta 90kDa                                                                                                                | DGKB                                     | 1,00 |
| folate receptor 2 (fetal)                                                                                                                        | FOLR2                                    | 1,00 |
| K(lysine) acetyltransferase 6B                                                                                                                   | KAT6B                                    | 1,00 |
| cytochrome P450, family 2, subfamily D, polypeptide 6                                                                                            | CYP2D6                                   | 1,00 |
| UTP20 small subunit (SSU) processome component                                                                                                   | UTP20                                    | 1,00 |
| protein kinase, Y-linked, pseudogene                                                                                                             | PRKY                                     | 1,00 |
| olfactory receptor, family 11, subfamily H, member 1                                                                                             | OR11H1                                   | 1,00 |
| coiled-coil domain containing 54                                                                                                                 | CCDC54                                   | 1,00 |
| chemokine (C-X-C motif) ligand 2                                                                                                                 | CXCL2                                    | 1,00 |
| keratin 2, type II                                                                                                                               | KRT2                                     | 1,00 |
| olfactory receptor, family 10, subfamily J, member 1                                                                                             | OR10J1                                   | 1,00 |
| POU class 6 homeobox 2                                                                                                                           | POU6F2                                   | 1,00 |
| OTU deubiquitinase 5                                                                                                                             | OTUD5                                    | 1,00 |
| olfactory receptor, family 51, subfamily I, member 1                                                                                             | OR51I1                                   | 1,00 |
| Sjogren syndrome nuclear autoantigen 1                                                                                                           | SSNA1                                    | 1,00 |
| canopy FGF signaling regulator 1                                                                                                                 | CNPY1                                    | 1,00 |
| transmembrane protein 174                                                                                                                        | TMEM174                                  | 1,00 |
| deltex 2, E3 ubiquitin ligase                                                                                                                    | DTX2                                     | 1,00 |
| cytochrome P450, family 4, subfamily A, polypeptide 11                                                                                           | CYP4A11                                  | 1,00 |
| TGFB-induced factor homeobox 2-like, Y-linked                                                                                                    | TGIF2LY                                  | 1,00 |
| dual specificity phosphatase and pro isomerase domain containing 1                                                                               | DUPD1                                    | 1,00 |
| dehydrogenase/reductase (SDR family) member 7B                                                                                                   | DHRS7B                                   | 1,00 |
| lysophosphatidic acid receptor 3                                                                                                                 | LPAR3                                    | 1,00 |

|                                                                                  |           |      |
|----------------------------------------------------------------------------------|-----------|------|
| potassium channel, two pore domain subfamily K, member 15                        | KCNK15    | 1,00 |
| NADH dehydrogenase (ubiquinone) 1 alpha subcomplex, 9, 39kDa                     | NDUFA9    | 1,00 |
| plasmolipin                                                                      | PLLP      | 1,00 |
| LMBR1 domain containing 1                                                        | LMBRD1    | 1,00 |
| orthodenticle homeobox 2                                                         | OTX2      | 1,00 |
| gremlin 1, DAN family BMP antagonist [Source:HGNC Symbol;Acc:HGNC:2001]          | GREM1     | 1,00 |
| tumor necrosis factor (ligand) superfamily, member 12                            | TNFSF12   | 1,00 |
| SV2 related protein                                                              | SVOP      | 1,00 |
| cell cycle and apoptosis regulator 2                                             | CCAR2     | 1,00 |
| nuclear mitotic apparatus protein 1                                              | NUMA1     | 1,00 |
| solute carrier family 27 (fatty acid transporter), member 1                      | SLC27A1   | 1,00 |
| Kruppel-like factor 4 (gut)                                                      | KLF4      | 1,00 |
| NUT family member 2F                                                             | NUTM2F    | 1,00 |
| WSC domain containing 2                                                          | WSCD2     | 1,00 |
| TATA box binding protein associated factor 15                                    | TAF15     | 1,00 |
| olfactory receptor, family 8, subfamily H, member 1                              | OR8H1     | 1,00 |
| piggyBac transposable element derived 4                                          | PGBD4     | 1,00 |
| wingless-type MMTV integration site family, member 11                            | WNT11     | 1,00 |
| transcription elongation factor A (SII) N-terminal and central domain containing | TCEANC    | 1,00 |
| REX1, RNA exonuclease 1 homolog-like 10, pseudogene                              | REXO1L10P | 1,00 |
| interleukin 37                                                                   | IL37      | 1,00 |
| reticulon 4 interacting protein 1                                                | RTN4IP1   | 1,00 |
| acyl-CoA binding domain containing 5                                             | ACBD5     | 1,00 |
| zinc finger and BTB domain containing 6                                          | ZBTB6     | 1,00 |
| HRAS-like suppressor family, member 5                                            | HRASLS5   | 1,00 |
| zinc finger protein 321, pseudogene                                              | ZNF321P   | 1,00 |
| chromosome 2 open reading frame 70                                               | C2orf70   | 1,00 |
| casein beta                                                                      | CSN2      | 1,00 |
| zinc finger protein 677                                                          | ZNF677    | 1,00 |
| T-box 15                                                                         | TBX15     | 1,00 |
| phospholipase D family, member 5                                                 | PLD5      | 1,00 |
| CD164 sialomucin-like 2                                                          | CD164L2   | 1,00 |
| transcription factor EC                                                          | TFEC      | 1,00 |
| huntingtin-associated protein 1                                                  | HAP1      | 1,00 |
| transcription elongation regulator 1                                             | TCERG1    | 1,00 |
| interleukin 4                                                                    | IL4       | 1,00 |
| adrenoceptor alpha 1A                                                            | ADRA1A    | 1,00 |
| leucine rich repeat containing 7                                                 | LRRC7     | 1,00 |

|                                                                                                                                                            |                     |      |
|------------------------------------------------------------------------------------------------------------------------------------------------------------|---------------------|------|
| Memczak2013 ALT_DONOR, coding, INTERNAL, intronic best transcript NM_021078                                                                                | KAT2A               | 1,00 |
| meiosis specific with coiled-coil domain                                                                                                                   | MEIOC               | 1,00 |
| leucine rich repeat containing 53                                                                                                                          | LRRC53              | 1,00 |
| SPHK1 interactor, AKAP domain containing                                                                                                                   | SPHKAP              | 1,00 |
| hedgehog acyltransferase-like                                                                                                                              | HHATL               | 1,00 |
| long intergenic non-protein coding RNA 961                                                                                                                 | LINC00961           | 1,00 |
| poly(ADP-ribose) polymerase family member 6                                                                                                                | PARP6               | 1,00 |
| MAGE family member A10                                                                                                                                     | MAGEA10             | 1,00 |
| golgin A6 family-like 9                                                                                                                                    | GOLGA6L9            | 0,99 |
| serine peptidase inhibitor, Kazal type 9                                                                                                                   | SPINK9              | 0,99 |
| defensin, beta 130                                                                                                                                         | DEFB130             | 0,99 |
| defensin, beta 130                                                                                                                                         | DEFB130             | 0,99 |
| GRIK1 antisense RNA 2; BTB and CNC homology 1, basic leucine zipper transcription factor 1                                                                 | GRIK1-AS2;<br>BACH1 | 0,99 |
| complement factor H-related 4                                                                                                                              | CFHR4               | 0,99 |
| DnaJ (Hsp40) homolog, subfamily B, member 14                                                                                                               | DNAJB14             | 0,99 |
| diacylglycerol kinase, delta 130kDa                                                                                                                        | DGKD                | 0,99 |
| selenoprotein K; selenoprotein K<br>[Source:EntrezGene;Acc:58515]; Transcript Identified by<br>AceView, Entrez Gene ID(s) 58515, RefSeq ID(s)<br>NM_021237 | SELK                | 0,99 |
| Janus kinase and microtubule interacting protein 3                                                                                                         | JAKMIP3             | 0,99 |
| chromosome 7 open reading frame 72                                                                                                                         | C7orf72             | 0,99 |
| Na <sup>+</sup> /K <sup>+</sup> transporting ATPase interacting 1                                                                                          | NKAIN1              | 0,99 |
| non-SMC condensin I complex subunit G                                                                                                                      | NCAPG               | 0,99 |
| NADH dehydrogenase (ubiquinone) 1 alpha subcomplex, 10, 42kDa                                                                                              | NDUFA10             | 0,99 |
| arylsulfatase family, member H                                                                                                                             | ARSH                | 0,99 |
| apelin receptor early endogenous ligand                                                                                                                    | APELA               | 0,99 |
| Kv channel interacting protein 1                                                                                                                           | KCNIP1              | 0,99 |
| erythrocyte membrane protein band 4.1 like 4A                                                                                                              | EPB41L4A            | 0,99 |
| otopetrin 2                                                                                                                                                | OTOP2               | 0,99 |
| angiopoietin like 4                                                                                                                                        | ANGPTL4             | 0,99 |
| phosphodiesterase 2A, cGMP-stimulated                                                                                                                      | PDE2A               | 0,99 |
| zinc finger, matrin-type 1                                                                                                                                 | ZMAT1               | 0,99 |
| StAR-related lipid transfer domain containing 6                                                                                                            | STARD6              | 0,99 |
| zinc finger protein 653                                                                                                                                    | ZNF653              | 0,99 |
| transmembrane protein 30B                                                                                                                                  | TMEM30B             | 0,99 |
| arrestin 3, retinal (X-arrestin)                                                                                                                           | ARR3                | 0,99 |
| queuine tRNA-ribosyltransferase 1                                                                                                                          | QTRT1               | 0,99 |
| collagen, type XIII, alpha 1                                                                                                                               | COL13A1             | 0,99 |
| DENN/MADD domain containing 4A                                                                                                                             | DENND4A             | 0,99 |
| Nance-Horan syndrome (congenital cataracts and dental anomalies)                                                                                           | NHS                 | 0,99 |

|                                                                                                                   |                  |      |
|-------------------------------------------------------------------------------------------------------------------|------------------|------|
| coiled-coil domain containing 115                                                                                 | CCDC115          | 0,99 |
| chromosome 7 open reading frame 13                                                                                | C7orf13          | 0,99 |
| adrenomedullin 5 (putative); carnitine palmitoyltransferase 1C                                                    | ADM5; CPT1C      | 0,99 |
| fucosyltransferase 7 (alpha (1,3) fucosyltransferase)                                                             | FUT7             | 0,99 |
| family with sequence similarity 127, member B                                                                     | FAM127B          | 0,99 |
| apolipoprotein A-IV                                                                                               | APOA4            | 0,99 |
| BCL2-like 11 (apoptosis facilitator)                                                                              | BCL2L11          | 0,99 |
| FER1L6 antisense RNA 1                                                                                            | FER1L6-AS1       | 0,99 |
| GDNF antisense RNA 1 (head to head)                                                                               | GDNF-AS1         | 0,99 |
| fucosyltransferase 2 (secretor status included)                                                                   | FUT2             | 0,99 |
| lamin tail domain containing 2                                                                                    | LMNTD2           | 0,99 |
| neural cell adhesion molecule 2                                                                                   | NCAM2            | 0,99 |
| synaptosome associated protein 29kDa                                                                              | SNAP29           | 0,99 |
| cytosolic thiouridylase subunit 1                                                                                 | CTU1             | 0,99 |
| coiled-coil domain containing 91                                                                                  | CCDC91           | 0,99 |
| cyclin I                                                                                                          | CCNI             | 0,99 |
| leucine rich repeat containing 43                                                                                 | LRRC43           | 0,99 |
| Transcript Identified by AceView, Entrez Gene ID(s) 257415                                                        | FAM133B          | 0,99 |
| GTP-binding protein 10 (putative)                                                                                 | GTPBP10          | 0,99 |
| WD repeat domain, phosphoinositide interacting 2                                                                  | WIP12            | 0,99 |
| DnaJ (Hsp40) homolog, subfamily C, member 10                                                                      | DNAJC10          | 0,99 |
| synaptonemal complex central element protein 1; shadow of prion protein homolog (zebrafish) pseudogene 1          | SYCE1; SPRNP1    | 0,99 |
| eukaryotic translation initiation factor 3, subunit C; eukaryotic translation initiation factor 3, subunit C-like | EIF3C; EIF3CL    | 0,99 |
| engrailed homeobox 1                                                                                              | EN1              | 0,99 |
| TAO kinase 1; microRNA 4523                                                                                       | TAOK1; MIR4523   | 0,99 |
| secretoglobin, family 1A, member 1 (uteroglobin)                                                                  | SCGB1A1          | 0,99 |
| prostaglandin F receptor (FP)                                                                                     | PTGFR            | 0,99 |
| olfactory receptor, family 4, subfamily D, member 11                                                              | OR4D11           | 0,99 |
| enhancer of yellow 2 homolog (Drosophila)                                                                         | ENY2             | 0,99 |
| astrotactin 2                                                                                                     | ASTN2            | 0,99 |
| N-glycanase 1                                                                                                     | NGLY1            | 0,99 |
| muscle, skeletal, receptor tyrosine kinase                                                                        | MUSK             | 0,99 |
| mesenchyme homeobox 1                                                                                             | MEOX1            | 0,99 |
| olfactory receptor, family 10, subfamily J, member 3                                                              | OR10J3           | 0,99 |
| trafficking protein particle complex 3                                                                            | TRAPPC3          | 0,99 |
| PRAME family member 8                                                                                             | PRAMEF8          | 0,99 |
| chemokine-like factor; CKLF-CMTM1 readthrough                                                                     | CKLF; CKLF-CMTM1 | 0,99 |
| KIAA1468                                                                                                          | KIAA1468         | 0,99 |
| chromosome 1 open reading frame 87                                                                                | C1orf87          | 0,99 |

|                                                                                                  |                         |      |
|--------------------------------------------------------------------------------------------------|-------------------------|------|
| bone morphogenetic protein/retinoic acid inducible neural-specific 3                             | BRINP3                  | 0,99 |
| zinc finger and BTB domain containing 37                                                         | ZBTB37                  | 0,99 |
| endo/exonuclease (5-3), endonuclease G-like                                                      | EXOG                    | 0,99 |
| transglutaminase 4                                                                               | TGM4                    | 0,99 |
| ribosomal protein S6 kinase, 90kDa, polypeptide 1                                                | RPS6KA1                 | 0,99 |
| interleukin 21 receptor                                                                          | IL21R                   | 0,99 |
| ADAMTS like 4                                                                                    | ADAMTSL4                | 0,99 |
| Eukaryotic translation initiation factor 3 subunit F<br>[Source:UniProtKB/Swiss-Prot;Acc:O00303] | EIF3F                   | 0,99 |
| Jeck2013 ALT_ACCEPTOR, ALT_DONOR, coding, INTERNAL, intronic best transcript NM_134261           | RORA                    | 0,99 |
| ZNF625-ZNF20 readthrough (NMD candidate); zinc finger protein 625                                | ZNF625-ZNF20;<br>ZNF625 | 0,99 |
| guanylate cyclase activator 1B (retina)                                                          | GUCA1B                  | 0,99 |
| potassium channel tetramerization domain containing 11                                           | KCTD11                  | 0,99 |
| Transcript Identified by AceView, Entrez Gene ID(s)<br>342184                                    | FMN1                    | 0,99 |
| copine IV                                                                                        | CPNE4                   | 0,99 |
| taste receptor, type 1, member 3                                                                 | TAS1R3                  | 0,99 |
| retrotransposon gag domain containing 4                                                          | RGAG4                   | 0,99 |
| peroxidasin like                                                                                 | PXDNL                   | 0,99 |
| 5-hydroxytryptamine (serotonin) receptor 1E, G protein-coupled                                   | HTR1E                   | 0,99 |
| zinc finger family member 767, pseudogene                                                        | ZNF767P                 | 0,99 |
| zinc finger protein 141                                                                          | ZNF141                  | 0,99 |
| copine VI (neuronal)                                                                             | CPNE6                   | 0,99 |
| chromosome 2 open reading frame 66                                                               | C2orf66                 | 0,99 |
| cilia and flagella associated 54                                                                 | CFAP54                  | 0,99 |
| TM4SF1 antisense RNA 1                                                                           | TM4SF1-AS1              | 0,99 |
| ectonucleotide pyrophosphatase/phosphodiesterase 2                                               | ENPP2                   | 0,99 |
| choline kinase beta                                                                              | CHKB                    | 0,99 |
| tubulin, epsilon 1                                                                               | TUBE1                   | 0,99 |
| ras homolog family member H                                                                      | RHOH                    | 0,99 |
| KIAA0125                                                                                         | KIAA0125                | 0,99 |
| Obg-like ATPase 1                                                                                | OLA1                    | 0,99 |
| DnaJ (Hsp40) homolog, subfamily B, member 8                                                      | DNAJB8                  | 0,99 |
| methyltransferase like 16                                                                        | METTL16                 | 0,99 |
| olfactory receptor, family 52, subfamily N, member 1                                             | OR52N1                  | 0,99 |
| family with sequence similarity 65, member C                                                     | FAM65C                  | 0,99 |
| nuclear speckle splicing regulatory protein 1; microRNA 423                                      | NSRP1; MIR423           | 0,99 |
| artemin                                                                                          | ARTN                    | 0,99 |
| small ubiquitin-like modifier 1                                                                  | SUMO1                   | 0,99 |



|                                                                                           |                         |      |
|-------------------------------------------------------------------------------------------|-------------------------|------|
| olfactory receptor, family 11, subfamily H, member 4                                      | OR11H4                  | 0,99 |
| TBC1 domain family, member 20                                                             | TBC1D20                 | 0,99 |
| AHNAK nucleoprotein                                                                       | AHNAK                   | 0,99 |
| matrix Gla protein                                                                        | MGP                     | 0,99 |
| S-antigen; retina and pineal gland (arrestin)                                             | SAG                     | 0,99 |
| membrane protein, palmitoylated 4                                                         | MPP4                    | 0,99 |
| SNAP-associated protein                                                                   | SNAPIN                  | 0,99 |
| tripartite motif containing 43B                                                           | TRIM43B                 | 0,99 |
| WNK lysine deficient protein kinase 1                                                     | WNK1                    | 0,99 |
| transmembrane protein 164                                                                 | TMEM164                 | 0,99 |
| proteasome (prosome, macropain) assembly chaperone 1                                      | PSMG1                   | 0,99 |
| activin A receptor type IB                                                                | ACVR1B                  | 0,99 |
| coiled-coil domain containing 66                                                          | CCDC66                  | 0,99 |
| zinc finger, SWIM-type containing 4                                                       | ZSWIM4                  | 0,99 |
| protein phosphatase 1, regulatory subunit 16A                                             | PPP1R16A                | 0,99 |
| zinc finger protein 846                                                                   | ZNF846                  | 0,99 |
| proline-rich protein BstNI subfamily 1                                                    | PRB1                    | 0,99 |
| transmembrane protein 179                                                                 | TMEM179                 | 0,99 |
| dickkopf-like 1                                                                           | DKKL1                   | 0,99 |
| amyloid beta (A4) precursor protein-binding, family B, member 1 (Fe65)                    | APBB1                   | 0,99 |
| Transcript Identified by AceView, Entrez Gene ID(s) 116442                                | RAB39B                  | 0,99 |
| small nuclear ribonucleoprotein polypeptide A                                             | SNRPA                   | 0,99 |
| RAR-related orphan receptor B                                                             | RORB                    | 0,99 |
| olfactory receptor, family 52, subfamily H, member 1                                      | OR52H1                  | 0,99 |
| NLR family, CARD domain containing 3                                                      | NLRC3                   | 0,99 |
| solute carrier family 6 (neutral amino acid transporter), member 17                       | SLC6A17                 | 0,99 |
| SPATA31 subfamily A, member 5; SPATA31 subfamily A, member 7                              | SPATA31A5;<br>SPATA31A7 | 0,99 |
| chromosome 10 open reading frame 67                                                       | C10orf67                | 0,99 |
| Memczak2013 ALT_ACCEPTOR, ALT_DONOR, coding, INTERNAL, intronic best transcript NM_016836 | RBMS1                   | 0,99 |
| T cell activation inhibitor, mitochondrial                                                | TCAIM                   | 0,99 |
| transmembrane protease, serine 11E                                                        | TMPRSS11E               | 0,99 |
|                                                                                           | LRIG1                   | 0,99 |
| enoyl-CoA hydratase domain containing 3                                                   | ECHDC3                  | 0,99 |
| PHD finger protein 24                                                                     | PHF24                   | 0,99 |
| receptor (chemosensory) transporter protein 3                                             | RTP3                    | 0,99 |
| NADH dehydrogenase (ubiquinone) 1, alpha/beta subcomplex, 1, 8kDa                         | NDUFAB1                 | 0,99 |
| G protein-coupled receptor 37 (endothelin receptor type B-like)                           | GPR37                   | 0,99 |

|                                                                                                                |                                                                                |      |
|----------------------------------------------------------------------------------------------------------------|--------------------------------------------------------------------------------|------|
| major intrinsic protein of lens fiber                                                                          | MIP                                                                            | 0,99 |
| mitogen-activated protein kinase kinase 3                                                                      | MAP2K3                                                                         | 0,99 |
| DEK proto-oncogene                                                                                             | DEK                                                                            | 0,99 |
| derlin 2                                                                                                       | DERL2                                                                          | 0,99 |
| diencephalon/mesencephalon homeobox 1                                                                          | DMBX1                                                                          | 0,99 |
| ubiquilin-like                                                                                                 | UBQLNL                                                                         | 0,99 |
| tetraspanin 19                                                                                                 | TSPAN19                                                                        | 0,99 |
| large tumor suppressor kinase 1                                                                                | LATS1                                                                          | 0,99 |
| peptidylprolyl isomerase A (cyclophilin A) pseudogene 30                                                       | PPIAP30                                                                        | 0,99 |
| IKAROS family zinc finger 3                                                                                    | IKZF3                                                                          | 0,99 |
| engrailed homeobox 2                                                                                           | EN2                                                                            | 0,99 |
| keratin associated protein 6-1                                                                                 | KRTAP6-1                                                                       | 0,99 |
| methyltransferase like 2B                                                                                      | METTL2B                                                                        | 0,99 |
| interferon induced transmembrane protein 10                                                                    | IFITM10                                                                        | 0,99 |
| ubiquitin B                                                                                                    | UBB                                                                            | 0,99 |
| uncharacterized LOC103611081; uncharacterized LOC100507431; Transcript Identified by AceView; novel transcript | LOC103611081;<br>LOC100507431;<br>RP11-890B15.3;<br>RP11-890B15.2;<br>klerglaw | 0,99 |
| DEAH (Asp-Glu-Ala-His) box polypeptide 37                                                                      | DHX37                                                                          | 0,99 |
| G protein-coupled receptor 139                                                                                 | GPR139                                                                         | 0,99 |
| chloride channel accessory 4                                                                                   | CLCA4                                                                          | 0,99 |
| chromosome 22 open reading frame 23                                                                            | C22orf23                                                                       | 0,99 |
| zinc finger protein 80                                                                                         | ZNF80                                                                          | 0,99 |
| glycoprotein M6B                                                                                               | GPM6B                                                                          | 0,99 |
| chromosome 4 open reading frame 47                                                                             | C4orf47                                                                        | 0,99 |
| cAMP responsive element binding protein 3-like 4                                                               | CREB3L4                                                                        | 0,99 |
| factor interacting with PAPOLA and CPSF1                                                                       | FIP1L1                                                                         | 0,99 |
| olfactory receptor, family 5, subfamily P, member 2                                                            | OR5P2                                                                          | 0,99 |
| kelch repeat and BTB (POZ) domain containing 3                                                                 | KBTBD3                                                                         | 0,99 |
| mal, T-cell differentiation protein-like                                                                       | MALL                                                                           | 0,99 |
| adhesion G protein-coupled receptor F1                                                                         | ADGRF1                                                                         | 0,99 |
| myosin, heavy chain 11, smooth muscle                                                                          | MYH11                                                                          | 0,99 |
| transmembrane BAX inhibitor motif containing 6                                                                 | TMBIM6                                                                         | 0,99 |
| signal peptidase complex subunit 1                                                                             | SPCS1                                                                          | 0,99 |
| 3-hydroxymethyl-3-methylglutaryl-CoA lyase-like 1                                                              | HMGCLL1                                                                        | 0,99 |
| beta-site APP-cleaving enzyme 2                                                                                | BACE2                                                                          | 0,99 |
| hydroxymethylbilane synthase                                                                                   | HMBS                                                                           | 0,99 |
| colony stimulating factor 2 (granulocyte-macrophage)                                                           | CSF2                                                                           | 0,99 |
| potassium channel, voltage gated subfamily A regulatory beta subunit 3                                         | KCNAB3                                                                         | 0,99 |
| olfactory receptor, family 4, subfamily D, member 1                                                            | OR4D1                                                                          | 0,99 |
| maelstrom spermatogenic transposon silencer                                                                    | MAEL                                                                           | 0,99 |

|                                                                                                                                |                                         |      |
|--------------------------------------------------------------------------------------------------------------------------------|-----------------------------------------|------|
| desmoglein 3                                                                                                                   | DSG3                                    | 0,99 |
| CDP-diacylglycerol synthase 2                                                                                                  | CDS2                                    | 0,99 |
| alkaline ceramidase 1                                                                                                          | ACER1                                   | 0,99 |
| uncharacterized LOC102724323; Transcript Identified by AceView, Entrez Gene ID(s) 220972; novel transcript                     | LOC102724323;<br>RP11-67C2.2;<br>MARCH8 | 0,99 |
| Memczak2013 ALT_ACCEPTOR, ALT_DONOR, coding, INTERNAL, intronic best transcript NM_181558                                      | RFC3                                    | 0,99 |
| olfactory receptor, family 2, subfamily B, member 11                                                                           | OR2B11                                  | 0,99 |
| leucine-rich repeat kinase 2                                                                                                   | LRRK2                                   | 0,99 |
| Ras homolog enriched in brain                                                                                                  | RHEB                                    | 0,99 |
| methionine sulfoxide reductase B2                                                                                              | MSRB2                                   | 0,99 |
| F-box protein 7                                                                                                                | FBXO7                                   | 0,99 |
| jun D proto-oncogene                                                                                                           | JUND                                    | 0,99 |
| phospholipase A2 inhibitor and LY6/PLAUR domain containing                                                                     | PINLYP                                  | 0,99 |
| regulation of nuclear pre-mRNA domain containing 2                                                                             | RPRD2                                   | 0,99 |
| family with sequence similarity 198, member A                                                                                  | FAM198A                                 | 0,99 |
| B-box and SPRY domain containing                                                                                               | BSPRY                                   | 0,99 |
| keratin associated protein 5-10                                                                                                | KRTAP5-10                               | 0,99 |
| protein phosphatase 1, regulatory subunit 15B                                                                                  | PPP1R15B                                | 0,99 |
| interferon regulatory factor 4                                                                                                 | IRF4                                    | 0,99 |
| membrane associated ring finger 11                                                                                             | MARCH11                                 | 0,99 |
| cortactin binding protein 2                                                                                                    | CTTNBP2                                 | 0,99 |
| coiled-coil domain containing 36                                                                                               | CCDC36                                  | 0,99 |
| protocadherin 18                                                                                                               | PCDH18                                  | 0,99 |
| olfactory receptor, family 6, subfamily V, member 1                                                                            | OR6V1                                   | 0,99 |
| DnaJ (Hsp40) homolog, subfamily C, member 18                                                                                   | DNAJC18                                 | 0,99 |
| FK506 binding protein 9                                                                                                        | FKBP9                                   | 0,99 |
| T-box 3                                                                                                                        | TBX3                                    | 0,99 |
| clathrin, heavy chain-like 1                                                                                                   | CLTCL1                                  | 0,99 |
| proteasome (prosome, macropain) assembly chaperone 3                                                                           | PSMG3                                   | 0,99 |
| 5-hydroxytryptamine (serotonin) receptor 2B, G protein-coupled                                                                 | HTR2B                                   | 0,99 |
| spermatogenesis and oogenesis specific basic helix-loop-helix 1                                                                | SOHLH1                                  | 0,99 |
| carbonic anhydrase III                                                                                                         | CA3                                     | 0,99 |
| C-type lectin domain family 3, member A                                                                                        | CLEC3A                                  | 0,99 |
| otolin 1                                                                                                                       | OTOL1                                   | 0,99 |
| olfactory receptor, family 4, subfamily Q, member 3                                                                            | OR4Q3                                   | 0,99 |
| Memczak2013 ALT_ACCEPTOR, ALT_DONOR, coding, INTERNAL, intronic best transcript NM_001193571; Transcript Identified by AceView | CSRP1; markobu                          | 0,99 |
| LIM homeobox transcription factor 1, alpha                                                                                     | LMX1A                                   | 0,99 |

|                                                                                                                                                                                                      |                       |      |
|------------------------------------------------------------------------------------------------------------------------------------------------------------------------------------------------------|-----------------------|------|
| glutamate receptor interacting protein 1                                                                                                                                                             | GRIP1                 | 0,99 |
| left-right determination factor 1                                                                                                                                                                    | LEFTY1                | 0,99 |
| coiled-coil domain containing 186; microRNA 2110                                                                                                                                                     | CCDC186;<br>MIR2110   | 0,99 |
| GRB2-associated binding protein 3                                                                                                                                                                    | GAB3                  | 0,99 |
| interferon, epsilon; MIR31 host gene                                                                                                                                                                 | IFNE; MIR31HG         | 0,99 |
| EF-hand domain (C-terminal) containing 2                                                                                                                                                             | EFHC2                 | 0,99 |
| eukaryotic translation initiation factor 4A3                                                                                                                                                         | EIF4A3                | 0,99 |
| solute carrier family 39 (zinc transporter), member 12                                                                                                                                               | SLC39A12              | 0,99 |
| REX1, RNA exonuclease 1 homolog-like 1, pseudogene;<br>REX1, RNA exonuclease 1 homolog-like 3, pseudogene                                                                                            | REXO1L1P;<br>REXO1L3P | 0,99 |
| ZFP91-CNTF readthrough (NMD candidate)                                                                                                                                                               | ZFP91-CNTF            | 0,99 |
| hydroxysteroid (17-beta) dehydrogenase 8                                                                                                                                                             | HSD17B8               | 0,99 |
| copine family member IX                                                                                                                                                                              | CPNE9                 | 0,99 |
| ALG1, chitobiosyldiphosphodolichol beta-mannosyltransferase-like 2                                                                                                                                   | ALG1L2                | 0,99 |
| ELKS/RAB6-interacting/CAST family member 1                                                                                                                                                           | ERC1                  | 0,99 |
| chromosome 6 open reading frame 58                                                                                                                                                                   | C6orf58               | 0,99 |
| PRAME family member 7                                                                                                                                                                                | PRAMEF7               | 0,99 |
| zinc finger protein 35                                                                                                                                                                               | ZNF35                 | 0,99 |
| Transcript Identified by AceView, Entrez Gene ID(s) 55278                                                                                                                                            | QRSL1                 | 0,99 |
| zinc finger, DHHC-type containing 24                                                                                                                                                                 | ZDHHC24               | 0,99 |
| sodium channel, voltage gated, type IV beta subunit                                                                                                                                                  | SCN4B                 | 0,99 |
| ankyrin repeat and sterile alpha motif domain containing 1A                                                                                                                                          | ANKS1A                | 0,99 |
| telomeric repeat binding factor 2                                                                                                                                                                    | TERF2                 | 0,99 |
| small integral membrane protein 4                                                                                                                                                                    | SMIM4                 | 0,99 |
| zinc finger protein 833, pseudogene                                                                                                                                                                  | ZNF833P               | 0,99 |
| matrix metalloproteinase 23B; matrix metalloproteinase 23A (pseudogene)                                                                                                                              | MMP23B;<br>MMP23A     | 0,99 |
| NLR family, pyrin domain containing 6                                                                                                                                                                | NLRP6                 | 0,99 |
| prosaposin-like 1 (gene/pseudogene)                                                                                                                                                                  | PSAPL1                | 0,99 |
| transmembrane protein 215                                                                                                                                                                            | TMEM215               | 0,99 |
| C2 calcium-dependent domain containing 4B                                                                                                                                                            | C2CD4B                | 0,99 |
| Synthetic construct Homo sapiens clone IMAGE:100063377, MGC:190767 ribosomal protein L41 (RPL41) mRNA, encodes complete protein.; 60S ribosomal protein L41 [Source:UniProtKB/Swiss-Prot;Acc:P62945] | RPL41                 | 0,99 |
| EF-hand calcium binding domain 14                                                                                                                                                                    | EFCAB14               | 0,99 |
| family with sequence similarity 159, member A                                                                                                                                                        | FAM159A               | 0,99 |
| Yip1 domain family member 4                                                                                                                                                                          | YIPF4                 | 0,99 |
| activating transcription factor 6                                                                                                                                                                    | ATF6                  | 0,99 |
| zinc finger, FYVE domain containing 27                                                                                                                                                               | ZFYVE27               | 0,99 |

|                                                                                                                                        |                           |      |
|----------------------------------------------------------------------------------------------------------------------------------------|---------------------------|------|
| protease, serine 41                                                                                                                    | PRSS41                    | 0,99 |
| protein inhibitor of activated STAT 2                                                                                                  | PIAS2                     | 0,99 |
| chromosome 3 open reading frame 22                                                                                                     | C3orf22                   | 0,99 |
| methyltransferase like 3                                                                                                               | METTL3                    | 0,99 |
| C5orf66 antisense RNA 1                                                                                                                | C5orf66-AS1               | 0,99 |
| DEAD (Asp-Glu-Ala-Asp) box helicase 5; microRNA 3064;<br>microRNA 5047                                                                 | DDX5; MIR3064;<br>MIR5047 | 0,99 |
| solute carrier family 25 (S-adenosylmethionine carrier),<br>member 26                                                                  | SLC25A26                  | 0,99 |
| NADH dehydrogenase (ubiquinone) 1 alpha subcomplex, 4-<br>like 2                                                                       | NDUFA4L2                  | 0,99 |
| nudix hydrolase 10                                                                                                                     | NUDT10                    | 0,99 |
| ribonuclease, RNase A family, 8                                                                                                        | RNASE8                    | 0,99 |
| doublecortin domain containing 2C                                                                                                      | DCDC2C                    | 0,99 |
| pleckstrin and Sec7 domain containing 4                                                                                                | PSD4                      | 0,99 |
| novel transcript; Transcript Identified by AceView, Entrez<br>Gene ID(s) 5690                                                          | RP4-728D4.2;<br>PSMB2     | 0,99 |
| S100 calcium binding protein G                                                                                                         | S100G                     | 0,99 |
| secretogranin II                                                                                                                       | SCG2                      | 0,99 |
| testis expressed 28                                                                                                                    | TEX28                     | 0,99 |
| C-type lectin domain family 5, member A                                                                                                | CLEC5A                    | 0,99 |
| ubiquitin-conjugating enzyme E2O                                                                                                       | UBE2O                     | 0,99 |
| regulator of G-protein signaling 22                                                                                                    | RGS22                     | 0,99 |
| cadherin 9, type 2 (T1-cadherin)                                                                                                       | CDH9                      | 0,99 |
| calcium/calmodulin-dependent protein kinase IV                                                                                         | CAMK4                     | 0,99 |
| HAUS augmin like complex subunit 3; polymerase (DNA<br>directed) nu                                                                    | HAUS3; POLN               | 0,99 |
| chromosome 1 open reading frame 122                                                                                                    | C1orf122                  | 0,99 |
| endo-beta-N-acetylglucosaminidase                                                                                                      | ENGASE                    | 0,99 |
| MT-RNR2-like 5                                                                                                                         | MTRNR2L5                  | 0,99 |
| polypeptide N-acetylgalactosaminyltransferase 18                                                                                       | GALNT18                   | 0,99 |
| Synthetic construct Homo sapiens clone<br>IMAGE:100063377, MGC:190767 ribosomal protein L41<br>(RPL41) mRNA, encodes complete protein. | RPL41                     | 0,99 |
| sorting nexin 17                                                                                                                       | SNX17                     | 0,99 |
| zinc finger protein 546                                                                                                                | ZNF546                    | 0,99 |
| protein kinase C, eta                                                                                                                  | PRKCH                     | 0,99 |
| B-cell translocation gene 4                                                                                                            | BTG4                      | 0,99 |
| SRY box 21                                                                                                                             | SOX21                     | 0,99 |
| solute carrier family 25, member 45                                                                                                    | SLC25A45                  | 0,99 |
| transmembrane and coiled-coil domains 2                                                                                                | TMCO2                     | 0,99 |
| PRAME family member 25                                                                                                                 | PRAMEF25                  | 0,99 |
| PRAME family member 25                                                                                                                 | PRAMEF25                  | 0,99 |
| FAM83H antisense RNA 1 (head to head)                                                                                                  | FAM83H-AS1                | 0,99 |
| zinc finger with KRAB and SCAN domains 7                                                                                               | ZKSCAN7                   | 0,99 |

|                                                                                                                                                                                                     |                                                                  |      |
|-----------------------------------------------------------------------------------------------------------------------------------------------------------------------------------------------------|------------------------------------------------------------------|------|
| 3-hydroxyacyl-CoA dehydratase 3                                                                                                                                                                     | HACD3                                                            | 0,99 |
| olfactory receptor, family 7, subfamily C, member 1                                                                                                                                                 | OR7C1                                                            | 0,99 |
| MICAL C-terminal like                                                                                                                                                                               | MICALCL                                                          | 0,99 |
| N-6 adenine-specific DNA methyltransferase 2 (putative)                                                                                                                                             | N6AMT2                                                           | 0,99 |
| bromodomain and PHD finger containing 3                                                                                                                                                             | BRPF3                                                            | 0,99 |
| E4F transcription factor 1                                                                                                                                                                          | E4F1                                                             | 0,99 |
| zinc finger with KRAB and SCAN domains 7                                                                                                                                                            | ZKSCAN7                                                          | 0,99 |
| iroquois homeobox 4                                                                                                                                                                                 | IRX4                                                             | 0,99 |
| leucine rich repeat containing 37, member A4, pseudogene                                                                                                                                            | LRRC37A4P                                                        | 0,99 |
| F-box protein 15                                                                                                                                                                                    | FBXO15                                                           | 0,99 |
| wingless-type MMTV integration site family, member 1                                                                                                                                                | WNT1                                                             | 0,99 |
| SPATA31 subfamily A, member 7; SPATA31 subfamily A, member 5                                                                                                                                        | SPATA31A7;<br>SPATA31A5                                          | 0,99 |
| apolipoprotein C-II                                                                                                                                                                                 | APOC2                                                            | 0,99 |
| actinin, alpha 2                                                                                                                                                                                    | ACTN2                                                            | 0,99 |
| adenylate cyclase 2 (brain)                                                                                                                                                                         | ADCY2                                                            | 0,99 |
| zinc finger protein 148                                                                                                                                                                             | ZNF148                                                           | 0,99 |
| phospholipid phosphatase 6                                                                                                                                                                          | PLPP6                                                            | 0,99 |
| piwi-like RNA-mediated gene silencing 3                                                                                                                                                             | PIWIL3                                                           | 0,99 |
| olfactory receptor, family 8, subfamily B, member 2                                                                                                                                                 | OR8B2                                                            | 0,99 |
| zinc finger protein 806                                                                                                                                                                             | ZNF806                                                           | 0,99 |
| steroidogenic acute regulatory protein                                                                                                                                                              | STAR                                                             | 0,99 |
| sodium channel, non voltage gated 1 delta subunit                                                                                                                                                   | SCNN1D                                                           | 0,99 |
| eukaryotic translation initiation factor 4A2; small nucleolar RNA, H/ACA box 63; small nucleolar RNA, C/D box 2; small nucleolar RNA, H/ACA box 4; small nucleolar RNA, H/ACA box 81; microRNA 1248 | EIF4A2;<br>SNORA63;<br>SNORD2;<br>SNORA4;<br>SNORA81;<br>MIR1248 | 0,99 |
| eva-1 homolog B (C. elegans)                                                                                                                                                                        | EVA1B                                                            | 0,99 |
| gastrulation brain homeobox 1                                                                                                                                                                       | GBX1                                                             | 0,99 |
| TRAF-interacting protein with forkhead-associated domain, family member B                                                                                                                           | TIFAB                                                            | 0,99 |
| olfactory receptor, family 8, subfamily J, member 3                                                                                                                                                 | OR8J3                                                            | 0,99 |
| GPRIN family member 3                                                                                                                                                                               | GPRIN3                                                           | 0,99 |
| gap junction protein beta 5                                                                                                                                                                         | GJB5                                                             | 0,99 |
| neurotrophin 4                                                                                                                                                                                      | NTF4                                                             | 0,99 |
| deoxyribonuclease I                                                                                                                                                                                 | DNASE1                                                           | 0,99 |
| zinc finger, BED-type containing 6; zinc finger CCCH-type containing 11A                                                                                                                            | ZBED6; ZC3H11A                                                   | 0,99 |
| anoctamin 10                                                                                                                                                                                        | ANO10                                                            | 0,99 |
| proteasome subunit alpha 6                                                                                                                                                                          | PSMA6                                                            | 0,99 |
| phosphoinositide-3-kinase interacting protein 1                                                                                                                                                     | PIK3IP1                                                          | 0,98 |

|                                                                                                                                                                                                                                                                                  |                                                       |      |
|----------------------------------------------------------------------------------------------------------------------------------------------------------------------------------------------------------------------------------------------------------------------------------|-------------------------------------------------------|------|
| trafficking protein particle complex 4                                                                                                                                                                                                                                           | TRAPPC4                                               | 0,98 |
| golgi SNAP receptor complex member 1                                                                                                                                                                                                                                             | GOSR1                                                 | 0,98 |
| nanos homolog 3 (Drosophila)                                                                                                                                                                                                                                                     | NANOS3                                                | 0,98 |
| TAF4 RNA polymerase II, TATA box binding protein (TBP)-associated factor, 135kDa                                                                                                                                                                                                 | TAF4                                                  | 0,98 |
| cripto, FRL-1, cryptic family 1                                                                                                                                                                                                                                                  | CFC1                                                  | 0,98 |
| mannosidase, alpha, class 1C, member 1                                                                                                                                                                                                                                           | MAN1C1                                                | 0,98 |
| IGF like family member 3                                                                                                                                                                                                                                                         | IGFL3                                                 | 0,98 |
| ribosomal protein L36a                                                                                                                                                                                                                                                           | RPL36A                                                | 0,98 |
| cholinergic receptor, nicotinic alpha 4                                                                                                                                                                                                                                          | CHRNA4                                                | 0,98 |
| DSN1 homolog, MIS12 kinetochore complex component                                                                                                                                                                                                                                | DSN1                                                  | 0,98 |
| LIM domain binding 3                                                                                                                                                                                                                                                             | LDB3                                                  | 0,98 |
| T-box 18                                                                                                                                                                                                                                                                         | TBX18                                                 | 0,98 |
| protein arginine methyltransferase 8                                                                                                                                                                                                                                             | PRMT8                                                 | 0,98 |
| potassium channel, voltage gated modifier subfamily G, member 4                                                                                                                                                                                                                  | KCNG4                                                 | 0,98 |
| double homeobox 4                                                                                                                                                                                                                                                                | DUX4                                                  | 0,98 |
| sialic acid binding Ig-like lectin 1, sialoadhesin                                                                                                                                                                                                                               | SIGLEC1                                               | 0,98 |
| mannosidase, alpha, class 2C, member 1                                                                                                                                                                                                                                           | MAN2C1                                                | 0,98 |
| transmembrane protease, serine 13                                                                                                                                                                                                                                                | TMPRSS13                                              | 0,98 |
| zinc finger protein 776                                                                                                                                                                                                                                                          | ZNF776                                                | 0,98 |
| hydroxymethylbilane synthase                                                                                                                                                                                                                                                     | HMBS                                                  | 0,98 |
| torsin A interacting protein 1                                                                                                                                                                                                                                                   | TOR1AIP1                                              | 0,98 |
| purine-rich element binding protein B; microRNA 4657                                                                                                                                                                                                                             | PURB; MIR4657                                         | 0,98 |
| protein phosphatase 1, regulatory (inhibitor) subunit 1B                                                                                                                                                                                                                         | PPP1R1B                                               | 0,98 |
| polycystic kidney and hepatic disease 1 (autosomal recessive)-like 1                                                                                                                                                                                                             | PKHD1L1                                               | 0,98 |
| inducible T-cell co-stimulator ligand                                                                                                                                                                                                                                            | ICOSLG                                                | 0,98 |
| zinc finger protein 197                                                                                                                                                                                                                                                          | ZNF197                                                | 0,98 |
| cilia and flagella associated protein 57                                                                                                                                                                                                                                         | CFAP57                                                | 0,98 |
| zinc finger protein 440                                                                                                                                                                                                                                                          | ZNF440                                                | 0,98 |
| MAGE family member A4                                                                                                                                                                                                                                                            | MAGEA4                                                | 0,98 |
| zinc finger protein 423                                                                                                                                                                                                                                                          | ZNF423                                                | 0,98 |
| immunoglobulin lambda-like polypeptide 5; microRNA 5571; immunoglobulin lambda constant 1 (Mcg marker); immunoglobulin lambda constant 2 (Kern-Oz- marker); immunoglobulin lambda variable 2-5 (pseudogene); immunoglobulin lambda variable 3-1; immunoglobulin lambda joining 1 | IGLL5; MIR5571; IGLC1; IGLC2; IGLV2-5; IGLV3-1; IGLJ1 | 0,98 |
| DEAD (Asp-Glu-Ala-Asp) box polypeptide 51                                                                                                                                                                                                                                        | DDX51                                                 | 0,98 |
| aryl hydrocarbon receptor interacting protein-like 1                                                                                                                                                                                                                             | AIPL1                                                 | 0,98 |
| olfactory receptor, family 4, subfamily A, member 8 (gene/pseudogene) [Source:HGNC Symbol;Acc:HGNC:15165]                                                                                                                                                                        | OR4A8                                                 | 0,98 |
| actin, alpha, cardiac muscle 1                                                                                                                                                                                                                                                   | ACTC1                                                 | 0,98 |

|                                                                                                                                                                                   |                                  |      |
|-----------------------------------------------------------------------------------------------------------------------------------------------------------------------------------|----------------------------------|------|
| SIX homeobox 5                                                                                                                                                                    | SIX5                             | 0,98 |
| embryonal Fyn-associated substrate                                                                                                                                                | EFS                              | 0,98 |
| Jeck2013 ALT_ACCEPTOR, ALT_DONOR, coding, INTERNAL, intronic best transcript NM_057159; Salzman2013 ALT_ACCEPTOR, ALT_DONOR, coding, INTERNAL, intronic best transcript NM_057159 | LPAR1                            | 0,98 |
| CACTIN antisense RNA 1                                                                                                                                                            | CACTIN-AS1                       | 0,98 |
| matrix metalloproteinase 17 (membrane-inserted)                                                                                                                                   | MMP17                            | 0,98 |
| interleukin 24                                                                                                                                                                    | IL24                             | 0,98 |
| tetraspanin 32                                                                                                                                                                    | TSPAN32                          | 0,98 |
| Transcript Identified by AceView, Entrez Gene ID(s) 54874                                                                                                                         | FNBP1L                           | 0,98 |
| mucin 20, cell surface associated; succinate dehydrogenase complex subunit A, flavoprotein pseudogene 2; microRNA 570; long intergenic non-protein coding RNA 969                 | MUC20; SDHAP2; MIR570; LINC00969 | 0,98 |
| katanin p60 subunit A-like 2                                                                                                                                                      | KATNAL2                          | 0,98 |
| macrophage expressed 1                                                                                                                                                            | MPEG1                            | 0,98 |
| KIAA0586                                                                                                                                                                          | KIAA0586                         | 0,98 |
| protein tyrosine phosphatase, receptor type, f polypeptide (PTPRF), interacting protein (liprin), alpha 3                                                                         | PPFIA3                           | 0,98 |
| WDR86 antisense RNA 1                                                                                                                                                             | WDR86-AS1                        | 0,98 |
| mitochondrial ribosomal protein S33                                                                                                                                               | MRPS33                           | 0,98 |
| Salzman2013 ALT_ACCEPTOR, ALT_DONOR, coding, INTERNAL, intronic best transcript NM_006989                                                                                         | RASA4                            | 0,98 |
| lysine (K)-specific demethylase 7A                                                                                                                                                | KDM7A                            | 0,98 |
| Transcript Identified by AceView, Entrez Gene ID(s) 57545                                                                                                                         | CC2D2A                           | 0,98 |
| proline rich 35                                                                                                                                                                   | PRR35                            | 0,98 |
| transmembrane (C-terminal) protease, serine 12                                                                                                                                    | TMPRSS12                         | 0,98 |
| Transcript Identified by AceView, Entrez Gene ID(s) 7486                                                                                                                          | WRN                              | 0,98 |
| transcription factor 7 (T-cell specific, HMG-box)                                                                                                                                 | TCF7                             | 0,98 |
| Rho GTPase activating protein 11B; Rho GTPase activating protein 11A                                                                                                              | ARHGAP11B; ARHGAP11A             | 0,98 |
| ribosomal protein S6 kinase, 90kDa, polypeptide 1                                                                                                                                 | RPS6KA1                          | 0,98 |
| delta-like 3 (Drosophila)                                                                                                                                                         | DLL3                             | 0,98 |
| von Willebrand factor A domain containing 3B                                                                                                                                      | VWA3B                            | 0,98 |
| NLR family, pyrin domain containing 5                                                                                                                                             | NLRP5                            | 0,98 |
| membrane associated guanylate kinase, WW and PDZ domain containing 2                                                                                                              | MAGI2                            | 0,98 |
| platelet factor 4 variant 1                                                                                                                                                       | PF4V1                            | 0,98 |
| solute carrier family 7, member 4                                                                                                                                                 | SLC7A4                           | 0,98 |
| family with sequence similarity 63, member B                                                                                                                                      | FAM63B                           | 0,98 |



|                                                                                           |              |      |
|-------------------------------------------------------------------------------------------|--------------|------|
| solute carrier family 47 (multidrug and toxin extrusion), member 2                        | SLC47A2      | 0,98 |
| PTC7 protein phosphatase homolog                                                          | PPTC7        | 0,98 |
| nuclear receptor subfamily 4, group A, member 2                                           | NR4A2        | 0,98 |
| tripartite motif containing 44                                                            | TRIM44       | 0,98 |
| splicing factor 3b subunit 5                                                              | SF3B5        | 0,98 |
| PILR alpha associated neural protein                                                      | PIANP        | 0,98 |
| olfactory receptor, family 5, subfamily T, member 3                                       | OR5T3        | 0,98 |
| chemokine (C-C motif) ligand 11                                                           | CCL11        | 0,98 |
| ELAV like neuron-specific RNA binding protein 2                                           | ELAVL2       | 0,98 |
| mutY DNA glycosylase                                                                      | MUTYH        | 0,98 |
| forkhead box D1                                                                           | FOXD1        | 0,98 |
| hyperpolarization activated cyclic nucleotide gated potassium channel 4                   | HCN4         | 0,98 |
| family with sequence similarity 231, member A                                             | FAM231A      | 0,98 |
| zinc finger protein 630                                                                   | ZNF630       | 0,98 |
| TBC1 domain family, member 32                                                             | TBC1D32      | 0,98 |
| methyl-CpG binding domain protein 3-like 1                                                | MBD3L1       | 0,98 |
| leucine-rich repeats and IQ motif containing 1                                            | LRRIQ1       | 0,98 |
| chromosome 11 open reading frame 85                                                       | C11orf85     | 0,98 |
| MAS-related GPR, member X2                                                                | MRGPRX2      | 0,98 |
| thyrotropin-releasing hormone receptor                                                    | TRHR         | 0,98 |
| MARVEL domain containing 3                                                                | MARVELD3     | 0,98 |
| transient receptor potential cation channel, subfamily C, member 6                        | TRPC6        | 0,98 |
| cilia and flagella associated protein 44                                                  | CFAP44       | 0,98 |
| keratin associated protein 4-7                                                            | KRTAP4-7     | 0,98 |
| chromosome 20 open reading frame 197                                                      | C20orf197    | 0,98 |
| cilia and flagella associated protein 47                                                  | CFAP47       | 0,98 |
| ATP binding cassette subfamily C member 8                                                 | ABCC8        | 0,98 |
| SRY box 3                                                                                 | SOX3         | 0,98 |
| tousled-like kinase 2                                                                     | TLK2         | 0,98 |
| alcohol dehydrogenase 1B (class I), beta polypeptide                                      | ADH1B        | 0,98 |
| zinc finger protein 729                                                                   | ZNF729       | 0,98 |
| nardilysin convertase; microRNA 761                                                       | NRDC; MIR761 | 0,98 |
| F11 antisense RNA 1                                                                       | F11-AS1      | 0,98 |
| metallo-beta-lactamase domain containing 1                                                | MBLAC1       | 0,98 |
| ribosomal protein S6 kinase, 90kDa, polypeptide 1                                         | RPS6KA1      | 0,98 |
| zinc finger protein 367                                                                   | ZNF367       | 0,98 |
| zinc finger protein 180                                                                   | ZNF180       | 0,98 |
| MAGE family member L2                                                                     | MAGEL2       | 0,98 |
| Memczak2013 ALT_ACCEPTOR, ALT_DONOR, coding, INTERNAL, intronic best transcript NM_000969 | RPL5         | 0,98 |
| protein kinase, cAMP-dependent, regulatory, type II, beta                                 | PRKAR2B      | 0,98 |

|                                                                                            |                  |      |
|--------------------------------------------------------------------------------------------|------------------|------|
| amine oxidase, copper containing 2 (retina-specific)                                       | AOC2             | 0,98 |
| RIMS binding protein 3                                                                     | RIMBP3           | 0,98 |
| Memczak2013 ANTISENSE, coding, INTERNAL, intronic<br>best transcript NM_014265             | ADAM28           | 0,98 |
| phosphotyrosine interaction domain containing 1                                            | PID1             | 0,98 |
| chromosome 6 open reading frame 163                                                        | C6orf163         | 0,98 |
| polymerase (DNA directed), mu; microRNA 6838                                               | POLM; MIR6838    | 0,98 |
| dynein, axonemal, heavy chain 1                                                            | DNAH1            | 0,98 |
| gametocyte specific factor 1-like                                                          | GTSF1L           | 0,98 |
| Na <sup>+</sup> /K <sup>+</sup> transporting ATPase interacting 3                          | NKAIN3           | 0,98 |
| regulator of G-protein signaling 6                                                         | RGS6             | 0,98 |
| polymerase (DNA directed), delta 1, catalytic subunit                                      | POLD1            | 0,98 |
| FEZ family zinc finger 1                                                                   | FEZF1            | 0,98 |
| H2A histone family, member J                                                               | H2AFJ            | 0,98 |
| sperm acrosome associated 3                                                                | SPACA3           | 0,98 |
| guanine nucleotide binding protein (G protein), gamma 3                                    | GNG3             | 0,98 |
| actinin, alpha 4                                                                           | ACTN4            | 0,98 |
| BPI fold containing family C                                                               | BPIFC            | 0,98 |
| taste receptor, type 2, member 39                                                          | TAS2R39          | 0,98 |
| glutaminase                                                                                | GLS              | 0,98 |
| ATP synthase F0 subunit 8; ATP synthase F0 subunit 6;<br>cytochrome c oxidase III          | ATP8; ATP6; COX3 | 0,98 |
| olfactory receptor, family 4, subfamily C, member 6                                        | OR4C6            | 0,98 |
| zinc finger, BED-type containing 9                                                         | ZBED9            | 0,98 |
| olfactory receptor, family 51, subfamily B, member 2<br>(gene/pseudogene)                  | OR51B2           | 0,98 |
| apolipoprotein B mRNA editing enzyme, catalytic<br>polypeptide-like 4 (putative)           | APOBEC4          | 0,98 |
| long intergenic non-protein coding RNA 1235                                                | LINC01235        | 0,98 |
| musculin                                                                                   | MSC              | 0,98 |
| transmembrane protein 240                                                                  | TMEM240          | 0,98 |
| Transcript Identified by AceView, Entrez Gene ID(s) 3836                                   | KPNA1            | 0,98 |
| growth differentiation factor 9                                                            | GDF9             | 0,98 |
| spermatogenesis associated 16                                                              | SPATA16          | 0,98 |
| synapse differentiation inducing 1                                                         | SYNDIG1          | 0,98 |
| guanine nucleotide binding protein (G protein), alpha<br>inhibiting activity polypeptide 2 | GNAI2            | 0,98 |
| keratin 6C, type II                                                                        | KRT6C            | 0,98 |
| defensin, beta 113                                                                         | DEFB113          | 0,98 |
| ADAM metallopeptidase with thrombospondin type 1<br>motif 13                               | ADAMTS13         | 0,98 |
| olfactory receptor, family 2, subfamily L, member 5                                        | OR2L5            | 0,98 |
| progressive rod-cone degeneration                                                          | PRCD             | 0,98 |

|                                                                                              |                    |      |
|----------------------------------------------------------------------------------------------|--------------------|------|
| PDZ domain containing ring finger 4                                                          | PDZRN4             | 0,98 |
| protein tyrosine phosphatase, receptor type, D                                               | PTPRD              | 0,98 |
| tumor suppressor candidate 2                                                                 | TUSC2              | 0,98 |
| eukaryotic translation initiation factor 5A-like 1                                           | EIF5AL1            | 0,98 |
| S-antigen; retina and pineal gland (arrestin)                                                | SAG                | 0,98 |
| gamma-aminobutyric acid (GABA) A receptor, alpha 6                                           | GABRA6             | 0,98 |
| phosphatidylinositol-4,5-bisphosphate 3-kinase, catalytic subunit gamma                      | PIK3CG             | 0,98 |
| aldo-keto reductase family 7, member A3 (aflatoxin aldehyde reductase)                       | AKR7A3             | 0,98 |
| E2F-associated phosphoprotein                                                                | EAPP               | 0,98 |
| shisa family member 7                                                                        | SHISA7             | 0,98 |
| taste receptor, type 2, member 38                                                            | TAS2R38            | 0,98 |
| SMAD family member 2                                                                         | SMAD2              | 0,98 |
| dehydrogenase/reductase (SDR family) member 7C                                               | DHRS7C             | 0,98 |
| family with sequence similarity 89, member A; microRNA 1182                                  | FAM89A;<br>MIR1182 | 0,98 |
| metal response element binding transcription factor 2                                        | MTF2               | 0,98 |
| APC membrane recruitment protein 3                                                           | AMER3              | 0,98 |
| cytokine induced apoptosis inhibitor 1                                                       | CIAPIN1            | 0,98 |
| seizure related 6 homolog (mouse)                                                            | SEZ6               | 0,98 |
| glutamate receptor, ionotropic, N-methyl D-aspartate 2C                                      | GRIN2C             | 0,98 |
| zinc finger, CW type with PWWP domain 2                                                      | ZCWPW2             | 0,98 |
| NADH dehydrogenase (ubiquinone) 1 beta subcomplex, 9, 22kDa                                  | NDUFB9             | 0,98 |
| neurocan                                                                                     | NCAN               | 0,98 |
| coiled-coil domain containing 184                                                            | CCDC184            | 0,98 |
| calpain 9                                                                                    | CAPN9              | 0,98 |
| sclerostin                                                                                   | SOST               | 0,98 |
| phospholipase A2 receptor 1                                                                  | PLA2R1             | 0,98 |
| transmembrane protein 187                                                                    | TMEM187            | 0,98 |
| Kruppel-like factor 17                                                                       | KLF17              | 0,98 |
| proteoglycan 4                                                                               | PRG4               | 0,98 |
| ephrin-A5                                                                                    | EFNA5              | 0,98 |
| histone cluster 1, H2bh                                                                      | HIST1H2BH          | 0,98 |
| carboxypeptidase A3 (mast cell)                                                              | CPA3               | 0,98 |
| IBA57 homolog, iron-sulfur cluster assembly                                                  | IBA57              | 0,98 |
| interleukin 17F                                                                              | IL17F              | 0,98 |
| dual specificity phosphatase 12                                                              | DUSP12             | 0,98 |
| thioredoxin domain containing 12 (endoplasmic reticulum); KTI12 chromatin associated homolog | TXNDC12; KTI12     | 0,98 |
| sterile alpha motif domain containing 10                                                     | SAMD10             | 0,98 |
| ribosomal protein L41 pseudogene 1                                                           | RPL41P1            | 0,98 |

|                                                                                                     |                      |      |
|-----------------------------------------------------------------------------------------------------|----------------------|------|
| novel transcript, sense overlapping TAF10; Transcript Identified by AceView, Entrez Gene ID(s) 6881 | RP11-732A19.2; TAF10 | 0,98 |
| teneurin transmembrane protein 3                                                                    | TENM3                | 0,98 |
| BCL2-like 2                                                                                         | BCL2L2               | 0,98 |
| solute carrier family 24 (sodium/potassium/calcium exchanger), member 3                             | SLC24A3              | 0,98 |
| IZUMO family member 3                                                                               | IZUMO3               | 0,98 |
| LysM, putative peptidoglycan-binding, domain containing 4                                           | LYSMD4               | 0,98 |
| ankyrin-repeat and fibronectin type III domain containing 1                                         | ANKFN1               | 0,98 |
| potassium channel tetramerization domain containing 16                                              | KCTD16               | 0,98 |
| alpha 1,4-galactosyltransferase                                                                     | A4GALT               | 0,98 |
| cyclic nucleotide gated channel alpha 3                                                             | CNGA3                | 0,98 |
| histidine rich calcium binding protein                                                              | HRC                  | 0,98 |
| cytochrome b-245, beta polypeptide                                                                  | CYBB                 | 0,98 |
| paired immunoglobulin-like type 2 receptor alpha                                                    | PILRA                | 0,98 |
| lipoprotein, Lp(a)-like 2, pseudogene                                                               | LPAL2                | 0,98 |
| RNA binding motif protein 5                                                                         | RBM5                 | 0,98 |
| PRAME family member 20                                                                              | PRAMEF20             | 0,98 |
| olfactory receptor, family 4, subfamily D, member 6                                                 | OR4D6                | 0,98 |
| epididymal peptidase inhibitor                                                                      | EPPIN                | 0,98 |
| adenylate cyclase activating polypeptide 1 (pituitary) receptor type I                              | ADCYAP1R1            | 0,98 |
| chromosome 12 open reading frame 40                                                                 | C12orf40             | 0,98 |
| abhydrolase domain containing 1                                                                     | ABHD1                | 0,98 |
| poly(ADP-ribose) polymerase family member 9                                                         | PARP9                | 0,98 |
| sialic acid binding Ig-like lectin 14; sialic acid binding Ig-like lectin 5                         | SIGLEC14; SIGLEC5    | 0,98 |
| ferric-chelate reductase 1                                                                          | FRRS1                | 0,98 |
| quinoid dihydropteridine reductase                                                                  | QDPR                 | 0,98 |
| dual oxidase 1                                                                                      | DUOX1                | 0,98 |
| Transcript Identified by AceView, Entrez Gene ID(s) 9320                                            | TRIP12               | 0,98 |
| mediator complex subunit 24; microRNA 6884                                                          | MED24; MIR6884       | 0,98 |
| atlastin GTPase 1                                                                                   | ATL1                 | 0,98 |
| neuregulin 4                                                                                        | NRG4                 | 0,98 |
| major histocompatibility complex, class II, DQ beta 2                                               | HLA-DQB2             | 0,98 |
| Memczak2013 ANTISENSE, CDS, coding, INTERNAL best transcript NM_181786                              | HKR1                 | 0,98 |
| Fc fragment of IgA receptor                                                                         | FCAR                 | 0,98 |
| solute carrier family 4, sodium bicarbonate cotransporter, member 9                                 | SLC4A9               | 0,98 |
| alanine--glyoxylate aminotransferase 2                                                              | AGXT2                | 0,98 |

|                                                                                                                                 |                       |      |
|---------------------------------------------------------------------------------------------------------------------------------|-----------------------|------|
| WD repeat domain 97                                                                                                             | WDR97                 | 0,98 |
| prostaglandin I2 (prostacyclin) synthase                                                                                        | PTGIS                 | 0,98 |
| novel transcript, antisense to C16orf53 and MVP; PAXIP1 associated glutamate-rich protein 1 [Source:HGNC Symbol;Acc:HGNC:28707] | AC009133.12;<br>PAGR1 | 0,98 |
| doublesex and mab-3 related transcription factor 3                                                                              | DMRT3                 | 0,98 |
| autophagy related 9B                                                                                                            | ATG9B                 | 0,98 |
| neurotrimin                                                                                                                     | NTM                   | 0,98 |
| ladybird homeobox 1                                                                                                             | LBX1                  | 0,98 |
| NUT midline carcinoma, family member 1                                                                                          | NUTM1                 | 0,98 |
| ribonuclease, RNase A family, 12 (non-active);<br>ribonuclease, RNase A family, 11 (non-active)                                 | RNASE12;<br>RNASE11   | 0,98 |
| defensin, beta 106B; defensin, beta 106A                                                                                        | DEFB106B;<br>DEFB106A | 0,98 |
| Transcript Identified by AceView, Entrez Gene ID(s) 65980                                                                       | BRD9                  | 0,98 |
| DTW domain containing 1                                                                                                         | DTWD1                 | 0,98 |
| RDH10 antisense RNA 1                                                                                                           | RDH10-AS1             | 0,98 |
| brain-derived neurotrophic factor                                                                                               | BDNF                  | 0,98 |
| WAS protein family homolog 1                                                                                                    | WASH1                 | 0,98 |
| PDZ and LIM domain 1                                                                                                            | PDLIM1                | 0,98 |
| carcinoembryonic antigen-related cell adhesion molecule 6 (non-specific cross reacting antigen)                                 | CEACAM6               | 0,98 |
| neuroblastoma breakpoint family, member 4                                                                                       | NBPF4                 | 0,98 |
| potassium channel tetramerization domain containing 8                                                                           | KCTD8                 | 0,98 |
| schlafen family member 12-like                                                                                                  | SLFN12L               | 0,98 |
| chromosome 2 open reading frame 88                                                                                              | C2orf88               | 0,98 |
| matrix metalloproteinase 24 (membrane-inserted)                                                                                 | MMP24                 | 0,98 |
| HAND2 antisense RNA 1 (head to head)                                                                                            | HAND2-AS1             | 0,98 |
| family with sequence similarity 131, member A                                                                                   | FAM131A               | 0,98 |
| F-box protein 3                                                                                                                 | FBXO3                 | 0,98 |
| complement component (3b/4b) receptor 1 (Knops blood group)                                                                     | CR1                   | 0,98 |
| zinc finger protein 711                                                                                                         | ZNF711                | 0,98 |
| leucine rich colipase-like 1                                                                                                    | LRCOL1                | 0,98 |
| family with sequence similarity 53, member C                                                                                    | FAM53C                | 0,98 |
| ST8 alpha-N-acetyl-neuraminide alpha-2,8-sialyltransferase 5                                                                    | ST8SIA5               | 0,98 |
| Wolf-Hirschhorn syndrome candidate 1-like 1                                                                                     | WHSC1L1               | 0,98 |
| ATPase, H <sup>+</sup> transporting, lysosomal V0 subunit a2                                                                    | ATP6V0A2              | 0,98 |
| leucine rich repeat and Ig domain containing 1                                                                                  | LINGO1                | 0,98 |
| potassium channel, voltage gated KQT-like subfamily Q, member 4                                                                 | KCNQ4                 | 0,98 |
| limb and CNS expressed 1                                                                                                        | LIX1                  | 0,98 |
| formin 1                                                                                                                        | FMN1                  | 0,98 |

|                                                                                                                                  |                         |      |
|----------------------------------------------------------------------------------------------------------------------------------|-------------------------|------|
| CDC like kinase 1                                                                                                                | CLK1                    | 0,98 |
| cytochrome P450, family 4, subfamily Z, polypeptide 1                                                                            | CYP4Z1                  | 0,98 |
| keratin associated protein 19-8                                                                                                  | KRTAP19-8               | 0,98 |
| transmembrane protein 176A                                                                                                       | TMEM176A                | 0,98 |
| solute carrier family 30 (zinc transporter), member 8                                                                            | SLC30A8                 | 0,98 |
| PRELI domain containing 1                                                                                                        | PRELID1                 | 0,98 |
| Memczak2013 ANTISENSE, coding, INTERNAL, intronic<br>best transcript NM_012399                                                   | PITPNB                  | 0,98 |
| CDKN2A interacting protein N-terminal like                                                                                       | CDKN2AIPNL              | 0,98 |
| family with sequence similarity 187, member B                                                                                    | FAM187B                 | 0,98 |
| Jeck2013 ALT_ACCEPTOR, ALT_DONOR, coding,<br>INTERNAL, intronic best transcript NM_032531                                        | KIRREL3                 | 0,98 |
| cyclin-dependent kinase 14                                                                                                       | CDK14                   | 0,98 |
| nuclear transcription factor, X-box binding-like 1                                                                               | NFXL1                   | 0,98 |
| deltex 1, E3 ubiquitin ligase                                                                                                    | DTX1                    | 0,98 |
| chromosome 11 open reading frame 74                                                                                              | C11orf74                | 0,98 |
| relaxin/insulin-like family peptide receptor 2                                                                                   | RXFP2                   | 0,98 |
| sex comb on midleg-like 1 (Drosophila)                                                                                           | SCML1                   | 0,98 |
| DEAH (Asp-Glu-Ala-His) box polypeptide 34                                                                                        | DHX34                   | 0,98 |
| activity-dependent neuroprotector homeobox                                                                                       | ADNP                    | 0,98 |
| polypeptide N-acetylgalactosaminyltransferase 3                                                                                  | GALNT3                  | 0,98 |
| collagen, type XXV, alpha 1                                                                                                      | COL25A1                 | 0,98 |
| growth differentiation factor 5                                                                                                  | GDF5                    | 0,98 |
| olfactory receptor, family 13, subfamily J, member 1                                                                             | OR13J1                  | 0,98 |
| DEAD (Asp-Glu-Ala-Asp) box helicase 6                                                                                            | DDX6                    | 0,98 |
| zinc finger protein 705E                                                                                                         | ZNF705E                 | 0,98 |
| leucine rich repeat neuronal 2                                                                                                   | LRRN2                   | 0,98 |
| coiled-coil domain containing 116                                                                                                | CCDC116                 | 0,98 |
| solute carrier family 35, member G6                                                                                              | SLC35G6                 | 0,98 |
| tripartite motif containing 23                                                                                                   | TRIM23                  | 0,98 |
| major facilitator superfamily domain containing 2A                                                                               | MFSD2A                  | 0,98 |
| proline rich 19                                                                                                                  | PRR19                   | 0,98 |
| small integral membrane protein 23                                                                                               | SMIM23                  | 0,98 |
| myosin light chain 10                                                                                                            | MYL10                   | 0,98 |
| hemoglobin, delta                                                                                                                | HBD                     | 0,98 |
| DAZ interacting zinc finger protein 3                                                                                            | DZIP3                   | 0,98 |
| Transcript Identified by AceView, Entrez Gene ID(s)<br>149111; novel transcript                                                  | CNIH3; RP11-<br>449J1.1 | 0,98 |
| NMD3 ribosome export adaptor                                                                                                     | NMD3                    | 0,98 |
| notch 3                                                                                                                          | NOTCH3                  | 0,98 |
| Transcript Identified by AceView, Entrez Gene ID(s)<br>149840                                                                    | C20orf196               | 0,98 |
| phosphoribosylglycinamide formyltransferase,<br>phosphoribosylglycinamide synthetase,<br>phosphoribosylaminoimidazole synthetase | GART                    | 0,98 |

|                                                                                                 |                 |      |
|-------------------------------------------------------------------------------------------------|-----------------|------|
| epithelial stromal interaction 1 (breast)                                                       | EPSTI1          | 0,98 |
| origin recognition complex subunit 2                                                            | ORC2            | 0,98 |
| dendrin                                                                                         | DDN             | 0,98 |
| Transcript Identified by AceView, Entrez Gene ID(s) 1997;<br>100128628                          | ELF1            | 0,98 |
| olfactory receptor, family 4, subfamily A, member 5                                             | OR4A5           | 0,98 |
| tribbles pseudokinase 3                                                                         | TRIB3           | 0,98 |
| kinase suppressor of ras 1                                                                      | KSR1            | 0,98 |
| basic helix-loop-helix domain containing, class B, 9                                            | BHLHB9          | 0,98 |
| protein tyrosine phosphatase, receptor type, N                                                  | PTPRN           | 0,98 |
| carbohydrate (N-acetylgalactosamine 4-0)<br>sulfotransferase 8                                  | CHST8           | 0,98 |
| transmembrane protein 213                                                                       | TMEM213         | 0,98 |
| glutamic-oxaloacetic transaminase 2, mitochondrial                                              | GOT2            | 0,98 |
| MAGE family member B18                                                                          | MAGEB18         | 0,98 |
| CDK5 regulatory subunit associated protein 1                                                    | CDK5RAP1        | 0,98 |
| chorionic gonadotropin, beta polypeptide 7                                                      | CGB7            | 0,98 |
| MT-RNR2-like 7                                                                                  | MTRNR2L7        | 0,98 |
| long intergenic non-protein coding RNA 173                                                      | LINC00173       | 0,98 |
| cyclin-dependent kinase 2 interacting protein                                                   | CINP            | 0,98 |
| LIM and senescent cell antigen-like domains 3-like                                              | LIMS3L          | 0,98 |
| C1q and tumor necrosis factor related protein 1                                                 | C1QTNF1         | 0,98 |
| pleckstrin homology domain containing, family A<br>(phosphoinositide binding specific) member 3 | PLEKHA3         | 0,98 |
| chromosome 3 open reading frame 80                                                              | C3orf80         | 0,98 |
| proteasome subunit beta 10                                                                      | PSMB10          | 0,98 |
| dopamine beta-hydroxylase (dopamine beta-<br>monooxygenase)                                     | DBH             | 0,98 |
| cell division cycle 73                                                                          | CDC73           | 0,98 |
| nucleoporin 85kDa                                                                               | NUP85           | 0,98 |
| B-cell translocation gene 1, anti-proliferative; long<br>intergenic non-protein coding RNA 1619 | BTG1; LINC01619 | 0,98 |
| zinc finger protein 407                                                                         | ZNF407          | 0,98 |
| wingless-type MMTV integration site family, member 9B                                           | WNT9B           | 0,98 |
| GLI family zinc finger 3                                                                        | GLI3            | 0,98 |
| intraflagellar transport 88                                                                     | IFT88           | 0,98 |
| claudin 18                                                                                      | CLDN18          | 0,98 |
| Fc fragment of IgE, low affinity II, receptor for (CD23)                                        | FCER2           | 0,98 |
| microseminoprotein, beta-                                                                       | MSMB            | 0,98 |
| uromodulin-like 1                                                                               | UMODL1          | 0,98 |
| cat eye syndrome chromosome region, candidate 6                                                 | CECR6           | 0,98 |
| killer cell immunoglobulin-like receptor, two domains,<br>long cytoplasmic tail, 4              | KIR2DL4         | 0,98 |
| Tctex1 domain containing 4                                                                      | TCTEX1D4        | 0,98 |

|                                                                                          |                |      |
|------------------------------------------------------------------------------------------|----------------|------|
| kelch repeat and BTB (POZ) domain containing 13                                          | KBTBD13        | 0,98 |
| neuroblastoma breakpoint family, member 12                                               | NBPF12         | 0,98 |
| protein tyrosine phosphatase, receptor type, C-associated protein                        | PTPRCAP        | 0,98 |
| coenzyme Q6 monooxygenase                                                                | COQ6           | 0,98 |
| SEBOX homeobox                                                                           | SEBOX          | 0,98 |
| coiled-coil domain containing 43                                                         | CCDC43         | 0,98 |
| Salzman2013 ANNOTATED, coding, OVEXON, UTR5 best transcript NM_001077664                 | URGCP          | 0,98 |
| endoplasmic reticulum-golgi intermediate compartment 1                                   | ERGIC1         | 0,98 |
| transient receptor potential cation channel, subfamily V, member 5                       | TRPV5          | 0,98 |
| succinate-CoA ligase, ADP-forming, beta subunit                                          | SUCLA2         | 0,98 |
| SPARC like 1                                                                             | SPARCL1        | 0,98 |
| mucin 5AC, oligomeric mucus/gel-forming                                                  | MUC5AC         | 0,98 |
| dual specificity phosphatase 23                                                          | DUSP23         | 0,98 |
| glutamate receptor interacting protein 2                                                 | GRIP2          | 0,98 |
| myogenin (myogenic factor 4)                                                             | MYOG           | 0,98 |
| C2 calcium-dependent domain containing 4C                                                | C2CD4C         | 0,98 |
| protein phosphatase 1, regulatory subunit 9B                                             | PPP1R9B        | 0,98 |
| olfactory receptor, family 4, subfamily C, member 15                                     | OR4C15         | 0,98 |
| surfactant protein C                                                                     | SFTPC          | 0,98 |
| transmembrane protein 147                                                                | TMEM147        | 0,98 |
| guanine nucleotide binding protein (G protein), gamma transducing activity polypeptide 2 | GNGT2          | 0,98 |
| olfactory receptor, family 4, subfamily K, member 1                                      | OR4K1          | 0,98 |
| chromosome 6 open reading frame 99                                                       | C6orf99        | 0,98 |
| G protein-coupled receptor 63                                                            | GPR63          | 0,98 |
| chemokine (C-C motif) ligand 2                                                           | CCL2           | 0,98 |
| glycine-N-acyltransferase-like 1                                                         | GLYATL1        | 0,98 |
| coiled-coil domain containing 97                                                         | CCDC97         | 0,97 |
| proprotein convertase subtilisin/kexin type 5                                            | PCSK5          | 0,97 |
| prostaglandin E receptor 1                                                               | PTGER1         | 0,97 |
| guanylate cyclase 2F, retinal                                                            | GUCY2F         | 0,97 |
| fibronectin type III domain containing 8                                                 | FNDC8          | 0,97 |
| chromosome 1 open reading frame 74                                                       | C1orf74        | 0,97 |
| ATPase, class I, type 8B, member 4                                                       | ATP8B4         | 0,97 |
| F-box protein 42                                                                         | FBXO42         | 0,97 |
| actin, alpha 2, smooth muscle, aorta                                                     | ACTA2          | 0,97 |
| WD repeat containing, antisense to TP53                                                  | WRAP53         | 0,97 |
| potassium channel, voltage gated eag related subfamily H, member 4                       | KCNH4          | 0,97 |
| Scm-like with four mbt domains 1                                                         | SFMBT1         | 0,97 |
| AE binding protein 1; microRNA 4649                                                      | AEBP1; MIR4649 | 0,97 |



|                                                                             |                         |      |
|-----------------------------------------------------------------------------|-------------------------|------|
| Transcript Identified by AceView, Entrez Gene ID(s) 2326                    | FMO1                    | 0,97 |
| seryl-tRNA synthetase 2, mitochondrial                                      | SARS2                   | 0,97 |
| coiled-coil domain containing 158                                           | CCDC158                 | 0,97 |
| coenzyme Q2 4-hydroxybenzoate polyprenyltransferase                         | COQ2                    | 0,97 |
| olfactory receptor, family 5, subfamily R, member 1<br>(gene/pseudogene)    | OR5R1                   | 0,97 |
| statherin                                                                   | STATH                   | 0,97 |
| joining chain of multimeric IgA and IgM                                     | JCHAIN                  | 0,97 |
| ATPase, aminophospholipid transporter (APLT), class I,<br>type 8A, member 1 | ATP8A1                  | 0,97 |
| carcinoembryonic antigen-related cell adhesion molecule<br>19               | CEACAM19                | 0,97 |
| single-pass membrane protein with coiled-coil domains 1                     | SMCO1                   | 0,97 |
| UL16 binding protein 1                                                      | ULBP1                   | 0,97 |
| RasGEF domain family member 1A                                              | RASGEF1A                | 0,97 |
| Transcript Identified by AceView, Entrez Gene ID(s) 4928                    | NUP98                   | 0,97 |
| phytanoyl-CoA dioxygenase domain containing 1                               | PHYHD1                  | 0,97 |
| chromosome 17 open reading frame 67                                         | C17orf67                | 0,97 |
| coiled-coil domain containing 71-like                                       | CCDC71L                 | 0,97 |
| protein tyrosine phosphatase type IVA, member 1                             | PTP4A1                  | 0,97 |
| dihydroorotate dehydrogenase (quinone)                                      | DHODH                   | 0,97 |
| nipsnap homolog 3A (C. elegans); nipsnap homolog 3B (C.<br>elegans)         | NIPSNAP3A;<br>NIPSNAP3B | 0,97 |
| FK506 binding protein 1B                                                    | FKBP1B                  | 0,97 |
| chymotrypsin-like elastase family, member 3A                                | CELA3A                  | 0,97 |
| Nik related kinase                                                          | NRK                     | 0,97 |
| ADAM metallopeptidase with thrombospondin type 1<br>motif 13                | ADAMTS13                | 0,97 |
| solute carrier family 6 (proline IMINO transporter),<br>member 20           | SLC6A20                 | 0,97 |
| troponin T type 2 (cardiac)                                                 | TNNT2                   | 0,97 |
| olfactory receptor, family 9, subfamily G, member 4                         | OR9G4                   | 0,97 |
| zinc finger CCCH-type containing 3                                          | ZC3H3                   | 0,97 |
| FIC domain containing                                                       | FICD                    | 0,97 |
| cathepsin W                                                                 | CTSW                    | 0,97 |
| phosphodiesterase 4C, cAMP-specific                                         | PDE4C                   | 0,97 |
| meteorin, glial cell differentiation regulator                              | METRNL                  | 0,97 |
| actin-related protein 2/3 complex inhibitor                                 | ARPIN                   | 0,97 |
| Meckel syndrome, type 1                                                     | MKS1                    | 0,97 |
| solute carrier family 4, sodium bicarbonate cotransporter,<br>member 7      | SLC4A7                  | 0,97 |
| isthmin 2                                                                   | ISM2                    | 0,97 |

|                                                                                     |                      |      |
|-------------------------------------------------------------------------------------|----------------------|------|
| nuclear receptor subfamily 3, group C, member 2                                     | NR3C2                | 0,97 |
| adhesion G protein-coupled receptor E1                                              | ADGRE1               | 0,97 |
| pleckstrin homology domain containing, family D (with coiled-coil domains) member 1 | PLEKHD1              | 0,97 |
| THAP domain containing, apoptosis associated protein 3                              | THAP3                | 0,97 |
| hemogen                                                                             | HEMGN                | 0,97 |
| chromosome 1 open reading frame 137                                                 | C1orf137             | 0,97 |
| prolactin-induced protein                                                           | PIP                  | 0,97 |
| sarcoma antigen 1                                                                   | SAGE1                | 0,97 |
| chromosome 12 open reading frame 80                                                 | C12orf80             | 0,97 |
| POU class 4 homeobox 3                                                              | POU4F3               | 0,97 |
| ADAM metallopeptidase domain 11                                                     | ADAM11               | 0,97 |
| tripartite motif containing 48                                                      | TRIM48               | 0,97 |
| guanylate cyclase activator 2B (uroguanylin)                                        | GUCA2B               | 0,97 |
| olfactory receptor, family 5, subfamily AL, member 1 (gene/pseudogene)              | OR5AL1               | 0,97 |
| ataxin 3-like                                                                       | ATXN3L               | 0,97 |
| long intergenic non-protein coding RNA 1140                                         | LINC01140            | 0,97 |
| RAS (RAD and GEM)-like GTP binding 2                                                | REM2                 | 0,97 |
| olfactory receptor, family 11, subfamily H, member 7 (gene/pseudogene)              | OR11H7               | 0,97 |
| ataxin 7-like 2                                                                     | ATXN7L2              | 0,97 |
| pre-B-cell leukemia homeobox 1                                                      | PBX1                 | 0,97 |
| exosome component 7                                                                 | EXOSC7               | 0,97 |
| WD repeat domain 17                                                                 | WDR17                | 0,97 |
| MAGE family member B10                                                              | MAGEB10              | 0,97 |
| hydroxy-delta-5-steroid dehydrogenase, 3 beta- and steroid delta-isomerase 1        | HSD3B1               | 0,97 |
| canopy FGF signaling regulator 3                                                    | CNPY3                | 0,97 |
| TOPORS antisense RNA 1; GVQW motif containing 1                                     | TOPORS-AS1;<br>GVQW1 | 0,97 |
| zymogen granule protein 16                                                          | ZG16                 | 0,97 |
| killer cell immunoglobulin-like receptor, three domains, X1                         | KIR3DX1              | 0,97 |
| Src-like-adaptor 2                                                                  | SLA2                 | 0,97 |
| eosinophil peroxidase                                                               | EPX                  | 0,97 |
| COP9 signalosome subunit 7B                                                         | COPS7B               | 0,97 |
| Jeck2013 ANTISENSE, coding, INTERNAL, intronic best transcript NM_022765            | MICAL1               | 0,97 |
| interferon, alpha 5                                                                 | IFNA5                | 0,97 |
| VENT homeobox                                                                       | VENTX                | 0,97 |
| smoothelin-like 2                                                                   | SMTNL2               | 0,97 |
| lamin tail domain containing 1                                                      | LMNTD1               | 0,97 |
| Kv channel interacting protein 4                                                    | KCNIP4               | 0,97 |
| mucin 6, oligomeric mucus/gel-forming                                               | MUC6                 | 0,97 |

|                                                                                  |                                        |      |
|----------------------------------------------------------------------------------|----------------------------------------|------|
| folate hydrolase (prostate-specific membrane antigen) 1                          | FOLH1                                  | 0,97 |
| KIAA1324                                                                         | KIAA1324                               | 0,97 |
| chromosome 1 open reading frame 162                                              | C1orf162                               | 0,97 |
| caspase recruitment domain family, member 14                                     | CARD14                                 | 0,97 |
| solute carrier family 6 (neurotransmitter transporter), member 7                 | SLC6A7                                 | 0,97 |
| PHD finger protein 5A                                                            | PHF5A                                  | 0,97 |
| oligodendrocyte transcription factor 1                                           | OLIG1                                  | 0,97 |
| family with sequence similarity 13, member C                                     | FAM13C                                 | 0,97 |
| CXADR-like membrane protein                                                      | CLMP                                   | 0,97 |
| ankyrin repeat domain 66                                                         | ANKRD66                                | 0,97 |
| enhancer of polycomb homolog 1 (Drosophila)                                      | EPC1                                   | 0,97 |
| family with sequence similarity 212, member B                                    | FAM212B                                | 0,97 |
| family with sequence similarity 3, member D                                      | FAM3D                                  | 0,97 |
| ectodysplasin A receptor                                                         | EDAR                                   | 0,97 |
| neuregulin 2                                                                     | NRG2                                   | 0,97 |
| growth arrest-specific 2 like 1                                                  | GAS2L1                                 | 0,97 |
| long intergenic non-protein coding RNA 1429                                      | LINC01429                              | 0,97 |
| CDGSH iron sulfur domain 1                                                       | CISD1                                  | 0,97 |
| uncharacterized LOC102724279; Transcript Identified by AceView; novel transcript | LOC102724279;<br>AC004791.2;<br>nimure | 0,97 |
| keratin associated protein 12-4                                                  | KRTAP12-4                              | 0,97 |
| keratin associated protein 5-5                                                   | KRTAP5-5                               | 0,97 |
| chromosome 14 open reading frame 39                                              | C14orf39                               | 0,97 |
| protein phosphatase 3, catalytic subunit, beta isozyme                           | PPP3CB                                 | 0,97 |
| WSC domain containing 1                                                          | WSCD1                                  | 0,97 |
| NEDD4 binding protein 2-like 2                                                   | N4BP2L2                                | 0,97 |
| tetraspanin 13                                                                   | TSPAN13                                | 0,97 |
| activin A receptor type II                                                       | ACVRL1                                 | 0,97 |
| coiled-coil domain containing 154                                                | CCDC154                                | 0,97 |
| t-complex 10                                                                     | TCP10                                  | 0,97 |
| ATP binding cassette subfamily F member 3                                        | ABCF3                                  | 0,97 |
| coagulation factor II (thrombin) receptor-like 3                                 | F2RL3                                  | 0,97 |
| long intergenic non-protein coding RNA 1565                                      | LINC01565                              | 0,97 |
| AE binding protein 2                                                             | AEBP2                                  | 0,97 |
| proline-rich coiled-coil 2B                                                      | PRRC2B                                 | 0,97 |

|                                                                                                                                                                                                                                                                                                              |                                                                                                 |      |
|--------------------------------------------------------------------------------------------------------------------------------------------------------------------------------------------------------------------------------------------------------------------------------------------------------------|-------------------------------------------------------------------------------------------------|------|
| TATA box binding protein associated factor 1D; small nucleolar RNA, H/ACA box 8; small nucleolar RNA, H/ACA box 18; small nucleolar RNA, H/ACA box 40; small nucleolar RNA, H/ACA box 1; small nucleolar RNA, H/ACA box 25; small nucleolar RNA, H/ACA box 32; small nucleolar RNA, C/D box 5; microRNA 1304 | TAF1D; SNORA8;<br>SNORA18;<br>SNORA40;<br>SNORA1;<br>SNORA25;<br>SNORA32;<br>SNORD5;<br>MIR1304 | 0,97 |
| cytochrome b                                                                                                                                                                                                                                                                                                 | CYTB                                                                                            | 0,97 |
| Zhang2013 ALT_ACCEPTOR, ALT_DONOR, coding, INTERNAL, intronic best transcript NM_022720                                                                                                                                                                                                                      | DGCR8                                                                                           | 0,97 |
| protein kinase N1                                                                                                                                                                                                                                                                                            | PKN1                                                                                            | 0,97 |
| uncharacterized LOC101929372; novel transcript                                                                                                                                                                                                                                                               | LOC101929372;<br>AC004019.13                                                                    | 0,97 |
| FGFR1 oncogene partner                                                                                                                                                                                                                                                                                       | FGFR1OP                                                                                         | 0,97 |
| mitochondrial ribosomal protein S18B                                                                                                                                                                                                                                                                         | MRPS18B                                                                                         | 0,97 |
| peptidyl arginine deiminase, type II                                                                                                                                                                                                                                                                         | PADI2                                                                                           | 0,97 |
| protein tyrosine phosphatase, non-receptor type 22 (lymphoid)                                                                                                                                                                                                                                                | PTPN22                                                                                          | 0,97 |
| ceramide synthase 2                                                                                                                                                                                                                                                                                          | CERS2                                                                                           | 0,97 |
| olfactory receptor family 4 subfamily K member 3 (gene/pseudogene) [Source:HGNC Symbol;Acc:HGNC:14731]                                                                                                                                                                                                       | OR4K3                                                                                           | 0,97 |
| two pore segment channel 2                                                                                                                                                                                                                                                                                   | TPCN2                                                                                           | 0,97 |
| zinc finger protein 276                                                                                                                                                                                                                                                                                      | ZNF276                                                                                          | 0,97 |
| CBP80/20-dependent translation initiation factor; microRNA 4743                                                                                                                                                                                                                                              | CTIF; MIR4743                                                                                   | 0,97 |
| phospholipase A2, group VII (platelet-activating factor acetylhydrolase, plasma)                                                                                                                                                                                                                             | PLA2G7                                                                                          | 0,97 |
| tachykinin receptor 3                                                                                                                                                                                                                                                                                        | TACR3                                                                                           | 0,97 |
| coiled-coil domain containing 105                                                                                                                                                                                                                                                                            | CCDC105                                                                                         | 0,97 |
| von Willebrand factor A domain containing 3A                                                                                                                                                                                                                                                                 | VWA3A                                                                                           | 0,97 |
| LYR motif containing 4                                                                                                                                                                                                                                                                                       | LYRM4                                                                                           | 0,97 |
| IQ motif containing G                                                                                                                                                                                                                                                                                        | IQCG                                                                                            | 0,97 |
| putative UPF0607 protein ENSP00000383783                                                                                                                                                                                                                                                                     | LOC100131107                                                                                    | 0,97 |
| minichromosome maintenance complex binding protein                                                                                                                                                                                                                                                           | MCMBP                                                                                           | 0,97 |
| DnaJ (Hsp40) homolog, subfamily C, member 27                                                                                                                                                                                                                                                                 | DNAJC27                                                                                         | 0,97 |
| leukocyte immunoglobulin-like receptor, subfamily B (with TM and ITIM domains), member 5                                                                                                                                                                                                                     | LILRB5                                                                                          | 0,97 |
| transmembrane protein 61                                                                                                                                                                                                                                                                                     | TMEM61                                                                                          | 0,97 |
| tubulin tyrosine ligase-like family member 9                                                                                                                                                                                                                                                                 | TTLL9                                                                                           | 0,97 |
| olfactory receptor, family 1, subfamily Q, member 1                                                                                                                                                                                                                                                          | OR1Q1                                                                                           | 0,97 |
| synapsin III                                                                                                                                                                                                                                                                                                 | SYN3                                                                                            | 0,97 |
| Transcript Identified by AceView, Entrez Gene ID(s) 9320                                                                                                                                                                                                                                                     | TRIP12                                                                                          | 0,97 |

|                                                                              |                |      |
|------------------------------------------------------------------------------|----------------|------|
| cytohesin 1 interacting protein                                              | CYTIP          | 0,97 |
| chromosome 6 open reading frame 226                                          | C6orf226       | 0,97 |
| ADP-ribosylation factor like GTPase 14 effector protein like                 | ARL14EPL       | 0,97 |
| carbohydrate (keratan sulfate Gal-6) sulfotransferase 1                      | CHST1          | 0,97 |
| prolyl-tRNA synthetase 2, mitochondrial (putative)                           | PARS2          | 0,97 |
| chemokine (C-X-C motif) ligand 11                                            | CXCL11         | 0,97 |
| myosin VIIA and Rab interacting protein                                      | MYRIP          | 0,97 |
| OTU deubiquitinase, ubiquitin aldehyde binding 1                             | OTUB1          | 0,97 |
| potassium channel, voltage gated modifier subfamily V, member 1              | KCNV1          | 0,97 |
| RAP2C, member of RAS oncogene family                                         | RAP2C          | 0,97 |
| solute carrier family 13 (sodium/sulfate symporter), member 4                | SLC13A4        | 0,97 |
| growth differentiation factor 10                                             | GDF10          | 0,97 |
| surfeit 6                                                                    | SURF6          | 0,97 |
| small integral membrane protein 10 like 2B                                   | SMIM10L2B      | 0,97 |
| interleukin 1 receptor associated kinase 3; microRNA 6502                    | IRAK3; MIR6502 | 0,97 |
| ATP13A5 antisense RNA 1                                                      | ATP13A5-AS1    | 0,97 |
| t-complex-associated-testis-expressed 1                                      | TCTE1          | 0,97 |
| folliculin-like 5                                                            | FSTL5          | 0,97 |
| androgen receptor                                                            | AR             | 0,97 |
| family with sequence similarity 183, member A                                | FAM183A        | 0,97 |
| Transcript Identified by AceView, Entrez Gene ID(s) 25788                    | RAD54B         | 0,97 |
| neuroblastoma breakpoint family, member 19                                   | NBPF19         | 0,97 |
| CDKN2A interacting protein                                                   | CDKN2AIP       | 0,97 |
| TSC22 domain family, member 3                                                | TSC22D3        | 0,97 |
| N(alpha)-acetyltransferase 20, NatB catalytic subunit                        | NAA20          | 0,97 |
| diphosphoinositol pentakisphosphate kinase 1                                 | PIPK1          | 0,97 |
| formin 2; alcohol dehydrogenase 5 (class III), chi polypeptide, pseudogene 3 | FMN2; ADH5P3   | 0,97 |
| cytokine receptor-like factor 3                                              | CRLF3          | 0,97 |
| zinc finger, CCHC domain containing 9                                        | ZCCHC9         | 0,97 |
| leucine-rich single-pass membrane protein 2                                  | LSMEM2         | 0,97 |
| transmembrane protein 75                                                     | TMEM75         | 0,97 |
| prolactin                                                                    | PRL            | 0,97 |
| TWIST neighbor                                                               | TWISTNB        | 0,97 |
| CD80 molecule                                                                | CD80           | 0,97 |
| hydroxysteroid (11-beta) dehydrogenase 1                                     | HSD11B1        | 0,97 |
| glucosidase, beta (bile acid) 2                                              | GBA2           | 0,97 |
| zinc finger protein 136                                                      | ZNF136         | 0,97 |
| Sad1 and UNC84 domain containing 5                                           | SUN5           | 0,97 |
| LKAAEAR motif containing 1                                                   | LKAAEAR1       | 0,97 |

|                                                                                                                                                        |                              |      |
|--------------------------------------------------------------------------------------------------------------------------------------------------------|------------------------------|------|
| uncharacterized LOC149950; novel transcript                                                                                                            | LOC149950; RP11-410N8.4      | 0,97 |
| gap junction protein gamma 2                                                                                                                           | GJC2                         | 0,97 |
| protein kinase C, gamma                                                                                                                                | PRKCG                        | 0,97 |
| growth arrest-specific 2 like 2                                                                                                                        | GAS2L2                       | 0,97 |
| olfactory receptor, family 2, subfamily T, member 34                                                                                                   | OR2T34                       | 0,97 |
| protease, serine, 23                                                                                                                                   | PRSS23                       | 0,97 |
| INTS3 and NABP interacting protein                                                                                                                     | INIP                         | 0,97 |
| membrane-spanning 4-domains, subfamily A, member 4A                                                                                                    | MS4A4A                       | 0,97 |
| gamma-aminobutyric acid (GABA) A receptor, alpha 1                                                                                                     | GABRA1                       | 0,97 |
| sphingosine-1-phosphate lyase 1                                                                                                                        | SGPL1                        | 0,97 |
| dishevelled-binding antagonist of beta-catenin 3                                                                                                       | DACT3                        | 0,97 |
| olfactory receptor, family 52, subfamily N, member 5                                                                                                   | OR52N5                       | 0,97 |
| otoconin 90                                                                                                                                            | OC90                         | 0,97 |
| desmoglein 4                                                                                                                                           | DSG4                         | 0,97 |
| potassium channel, voltage gated eag related subfamily H, member 1                                                                                     | KCNH1                        | 0,97 |
| bestrophin 4                                                                                                                                           | BEST4                        | 0,97 |
| phosphatidylserine synthase 1                                                                                                                          | PTDSS1                       | 0,97 |
| chromosome 5 open reading frame 24                                                                                                                     | C5orf24                      | 0,97 |
| crystallin beta B3                                                                                                                                     | CRYBB3                       | 0,97 |
| breakpoint cluster region                                                                                                                              | BCR                          | 0,97 |
| zinc finger protein 618                                                                                                                                | ZNF618                       | 0,97 |
| rhophilin, Rho GTPase binding protein 1                                                                                                                | RHPN1                        | 0,97 |
| hydroxymethylbilane synthase                                                                                                                           | HMBS                         | 0,97 |
| Transcript Identified by AceView, Entrez Gene ID(s) 130888                                                                                             | FBXO36                       | 0,97 |
| MOB kinase activator 3C                                                                                                                                | MOB3C                        | 0,97 |
| CD4 molecule                                                                                                                                           | CD4                          | 0,97 |
| Memczak2013 ALT_ACCEPTOR, ALT_DONOR, coding, INTERNAL, intronic best transcript NM_014661                                                              | FAM53B                       | 0,97 |
| uncharacterized protein ENSP00000383407-like; Transcript Identified by AceView; HCG1818297; Protein LOC388813 [Source:UniProtKB/TrEMBL;Acc:A0A087WSY0] | LOC388813; bafor; AF165138.7 | 0,97 |
| ovo-like zinc finger 2                                                                                                                                 | OVOL2                        | 0,97 |
| Transcript Identified by AceView, Entrez Gene ID(s) 171586                                                                                             | ABHD3                        | 0,97 |
| olfactory receptor, family 2, subfamily D, member 3                                                                                                    | OR2D3                        | 0,97 |
| family with sequence similarity 131, member C                                                                                                          | FAM131C                      | 0,97 |
| sel-1 suppressor of lin-12-like 2 (C. elegans)                                                                                                         | SEL1L2                       | 0,97 |
| homeobox D10                                                                                                                                           | HOXD10                       | 0,97 |
| RNA binding motif protein, X-linked-like 3                                                                                                             | RBMXL3                       | 0,97 |
| interferon, alpha 17                                                                                                                                   | IFNA17                       | 0,97 |

|                                                                                                              |               |      |
|--------------------------------------------------------------------------------------------------------------|---------------|------|
| family with sequence similarity 181, member B                                                                | FAM181B       | 0,97 |
| EMSY BRCA2-interacting transcriptional repressor                                                             | EMSY          | 0,97 |
| neuronal differentiation 6                                                                                   | NEUROD6       | 0,97 |
| nuclear receptor interacting protein 2                                                                       | NRIP2         | 0,97 |
| 5-hydroxytryptamine (serotonin) receptor 3D, ionotropic                                                      | HTR3D         | 0,97 |
| leucine-rich repeats and IQ motif containing 4                                                               | LRRIQ4        | 0,97 |
| olfactory receptor, family 2, subfamily A, member 14;<br>olfactory receptor, family 2, subfamily A, member 2 | OR2A14; OR2A2 | 0,97 |
| ATPase type 13A4                                                                                             | ATP13A4       | 0,97 |
| Zhang2013 ALT_ACCEPTOR, ALT_DONOR, coding,<br>INTERNAL, intronic best transcript NM_004582                   | RABGGTB       | 0,97 |
| family with sequence similarity 71, member E2                                                                | FAM71E2       | 0,97 |
| ADP-ribosylation factor like GTPase 13A                                                                      | ARL13A        | 0,97 |
| thioredoxin-related transmembrane protein 3                                                                  | TMX3          | 0,97 |
| zinc finger CCCH-type containing 7A                                                                          | ZC3H7A        | 0,97 |
| RNA binding protein, fox-1 homolog (C. elegans) 2                                                            | RBFOX2        | 0,97 |
| B-cell acute lymphoblastic leukemia expressed                                                                | BLACE         | 0,97 |
| regulatory factor X, 1 (influences HLA class II expression)                                                  | RFX1          | 0,97 |
| Ellis van Creveld protein                                                                                    | EVC           | 0,97 |
| interferon induced transmembrane protein 5                                                                   | IFITM5        | 0,97 |
| NADH dehydrogenase (ubiquinone) 1 alpha subcomplex,<br>10, 42kDa                                             | NDUFA10       | 0,97 |
| regulated endocrine-specific protein 18                                                                      | RESP18        | 0,97 |
| EF-hand calcium binding domain 9                                                                             | EFCAB9        | 0,97 |
| keratin associated protein 10-5                                                                              | KRTAP10-5     | 0,97 |
| zinc finger protein 707                                                                                      | ZNF707        | 0,97 |
| chromosome 11 open reading frame 88                                                                          | C11orf88      | 0,97 |
| eukaryotic translation initiation factor 4E family member<br>1B                                              | EIF4E1B       | 0,97 |
| peptidase M20 domain containing 2                                                                            | PM20D2        | 0,97 |
| meiotic kinetochore factor                                                                                   | MEIKIN        | 0,97 |
| PR domain containing 16                                                                                      | PRDM16        | 0,97 |
| chromosome 20 open reading frame 202                                                                         | C20orf202     | 0,97 |
| defensin, beta 126                                                                                           | DEFB126       | 0,97 |
| zinc finger, SWIM-type containing 3                                                                          | ZSWIM3        | 0,97 |
| MyoD family inhibitor domain containing                                                                      | MDFIC         | 0,97 |
| retinoid X receptor beta                                                                                     | RXRB          | 0,97 |
| major facilitator superfamily domain containing 6-like                                                       | MFSD6L        | 0,97 |
| Transcript Identified by AceView, Entrez Gene ID(s) 5257                                                     | PHKB          | 0,97 |
| Memczak2013 ANTISENSE, coding, INTERNAL, intronic<br>best transcript NM_001146694                            | KDM4C         | 0,97 |
| tubulin folding cofactor E-like                                                                              | TBCEL         | 0,97 |
| apolipoprotein L, 4                                                                                          | APOL4         | 0,97 |

|                                                                             |          |      |
|-----------------------------------------------------------------------------|----------|------|
| LY6/PLAUR domain containing 6                                               | LYPD6    | 0,97 |
| lymphocyte antigen 6 complex, locus K                                       | LY6K     | 0,97 |
| fibrillarin-like 1                                                          | FBLL1    | 0,97 |
| RAB3A interacting protein (rabin3)-like 1                                   | RAB3IL1  | 0,97 |
| dynein, axonemal, heavy chain 10 opposite strand                            | DNAH10OS | 0,97 |
| general transcription factor IIF subunit 1                                  | GTF2F1   | 0,97 |
| transmembrane protein 200A                                                  | TMEM200A | 0,97 |
| ST8 alpha-N-acetyl-neuraminide alpha-2,8-sialyltransferase 2                | ST8SIA2  | 0,97 |
| Transcript Identified by AceView, Entrez Gene ID(s) 10060                   | ABCC9    | 0,97 |
| solute carrier family 4, sodium bicarbonate cotransporter, member 8         | SLC4A8   | 0,97 |
| family with sequence similarity 78, member B                                | FAM78B   | 0,97 |
| kin of IRRE like 2 (Drosophila)                                             | KIRREL2  | 0,97 |
| transmembrane protein 248                                                   | TMEM248  | 0,97 |
| potassium channel, two pore domain subfamily K, member 9                    | KCNK9    | 0,97 |
| karyopherin (importin) beta 1                                               | KPNB1    | 0,97 |
| solute carrier family 22, member 20                                         | SLC22A20 | 0,97 |
| zinc finger protein 709                                                     | ZNF709   | 0,97 |
| bombesin-like receptor 3                                                    | BRS3     | 0,97 |
| sulfatase modifying factor 1                                                | SUMF1    | 0,97 |
| bone marrow stromal cell antigen 2                                          | BST2     | 0,97 |
| calcitonin-related polypeptide alpha                                        | CALCA    | 0,97 |
| zinc finger protein 513                                                     | ZNF513   | 0,97 |
| olfactory receptor, family 2, subfamily W, member 3                         | OR2W3    | 0,97 |
| developmentally regulated GTP binding protein 1                             | DRG1     | 0,97 |
| leucine rich repeat containing 72                                           | LRRC72   | 0,97 |
| BCL2-like 14 (apoptosis facilitator)                                        | BCL2L14  | 0,97 |
| fibroblast growth factor 8 (androgen-induced)                               | FGF8     | 0,97 |
| CD86 molecule                                                               | CD86     | 0,97 |
| fer-1-like family member 6                                                  | FER1L6   | 0,97 |
| transmembrane protein 218                                                   | TMEM218  | 0,97 |
| armadillo repeat containing, X-linked 2                                     | ARMCX2   | 0,97 |
| kelch repeat and BTB (POZ) domain containing 4                              | KBTBD4   | 0,97 |
| retinol dehydrogenase 13 (all-trans/9-cis)                                  | RDH13    | 0,97 |
| LDL receptor related protein 8                                              | LRP8     | 0,97 |
| nucleoporin 155kDa                                                          | NUP155   | 0,97 |
| interferon regulatory factor 1                                              | IRF1     | 0,97 |
| Jeck2013 ANTISENSE, coding, INTERNAL, intronic best transcript NM_001103184 | FMN1     | 0,97 |
| cadherin 7, type 2                                                          | CDH7     | 0,97 |
| lipoyl(octanoyl) transferase 2 (putative)                                   | LIPT2    | 0,97 |
| synuclein alpha interacting protein                                         | SNCAIP   | 0,97 |



|                                                                                                                                                                                                                                                                                                                                                                                                                                                                                                                                   |               |      |
|-----------------------------------------------------------------------------------------------------------------------------------------------------------------------------------------------------------------------------------------------------------------------------------------------------------------------------------------------------------------------------------------------------------------------------------------------------------------------------------------------------------------------------------|---------------|------|
| small integral membrane protein 10 like 2A                                                                                                                                                                                                                                                                                                                                                                                                                                                                                        | SMIM10L2A     | 0,97 |
| ring finger protein, LIM domain interacting                                                                                                                                                                                                                                                                                                                                                                                                                                                                                       | RLIM          | 0,97 |
| hedgehog acyltransferase                                                                                                                                                                                                                                                                                                                                                                                                                                                                                                          | HHAT          | 0,97 |
| YLP motif containing 1                                                                                                                                                                                                                                                                                                                                                                                                                                                                                                            | YLPM1         | 0,97 |
| chondroitin sulfate proteoglycan 4                                                                                                                                                                                                                                                                                                                                                                                                                                                                                                | CSPG4         | 0,97 |
| vasoactive intestinal peptide receptor 2                                                                                                                                                                                                                                                                                                                                                                                                                                                                                          | VIPR2         | 0,97 |
| interleukin 12A                                                                                                                                                                                                                                                                                                                                                                                                                                                                                                                   | IL12A         | 0,97 |
| coronin, actin binding protein, 2A                                                                                                                                                                                                                                                                                                                                                                                                                                                                                                | CORO2A        | 0,97 |
| synaptonemal complex protein 2-like                                                                                                                                                                                                                                                                                                                                                                                                                                                                                               | SYCP2L        | 0,97 |
| shisa family member 2                                                                                                                                                                                                                                                                                                                                                                                                                                                                                                             | SHISA2        | 0,97 |
| carboxypeptidase B1 (tissue)                                                                                                                                                                                                                                                                                                                                                                                                                                                                                                      | CPB1          | 0,97 |
| cytochrome P450, family 20, subfamily A, polypeptide 1                                                                                                                                                                                                                                                                                                                                                                                                                                                                            | CYP20A1       | 0,97 |
| glycogen synthase 2 (liver)                                                                                                                                                                                                                                                                                                                                                                                                                                                                                                       | GYS2          | 0,97 |
| hepatoma-derived growth factor, related protein 3;<br>Hepatoma-derived growth factor-related protein 3<br>[Source:UniProtKB/Swiss-Prot;Acc:Q9Y3E1]; Transcript<br>Identified by AceView, Entrez Gene ID(s) 50810;<br>Jeck2013, Memczak2013, Salzman2013 ANNOTATED,<br>CDS, coding, INTERNAL, OVCODE, OVEXON best transcript<br>NM_016073; Jeck2013 ALT_ACCEPTOR, ALT_DONOR,<br>coding, INTERNAL, intronic best transcript NM_016073;<br>Salzman2013 ANNOTATED, CDS, coding, INTERNAL,<br>OVCODE, OVEXON best transcript NM_016073 | HDGFRP3       | 0,97 |
| ATR interacting protein; three prime repair exonuclease 1                                                                                                                                                                                                                                                                                                                                                                                                                                                                         | ATRIP; TREX1  | 0,97 |
| SMG1 phosphatidylinositol 3-kinase-related kinase                                                                                                                                                                                                                                                                                                                                                                                                                                                                                 | SMG1          | 0,97 |
| solute carrier family 23, member 3                                                                                                                                                                                                                                                                                                                                                                                                                                                                                                | SLC23A3       | 0,97 |
| glutamate receptor, ionotropic, delta 1                                                                                                                                                                                                                                                                                                                                                                                                                                                                                           | GRID1         | 0,97 |
| myotubularin related protein 3                                                                                                                                                                                                                                                                                                                                                                                                                                                                                                    | MTMR3         | 0,97 |
| CWF19-like 2, cell cycle control (S. pombe)                                                                                                                                                                                                                                                                                                                                                                                                                                                                                       | CWF19L2       | 0,97 |
| zinc finger protein 487                                                                                                                                                                                                                                                                                                                                                                                                                                                                                                           | ZNF487        | 0,97 |
| single-pass membrane protein with coiled-coil domains 3                                                                                                                                                                                                                                                                                                                                                                                                                                                                           | SMCO3         | 0,97 |
| ubiquitin specific peptidase 9, Y-linked; testis-specific<br>transcript, Y-linked 15 (non-protein coding)                                                                                                                                                                                                                                                                                                                                                                                                                         | USP9Y; TTTY15 | 0,97 |
| keratin associated protein 17-1                                                                                                                                                                                                                                                                                                                                                                                                                                                                                                   | KRTAP17-1     | 0,97 |
| NHL repeat containing 4; phosphatidylinositol glycan<br>anchor biosynthesis class Q                                                                                                                                                                                                                                                                                                                                                                                                                                               | NHLRC4; PIGQ  | 0,97 |
| growth associated protein 43                                                                                                                                                                                                                                                                                                                                                                                                                                                                                                      | GAP43         | 0,97 |
| WD repeat domain 86                                                                                                                                                                                                                                                                                                                                                                                                                                                                                                               | WDR86         | 0,97 |
| chromosome 22 open reading frame 31                                                                                                                                                                                                                                                                                                                                                                                                                                                                                               | C22orf31      | 0,97 |
| Transcript Identified by AceView, Entrez Gene ID(s) 23355                                                                                                                                                                                                                                                                                                                                                                                                                                                                         | VPS8          | 0,97 |
| C-type lectin domain family 6, member A                                                                                                                                                                                                                                                                                                                                                                                                                                                                                           | CLEC6A        | 0,97 |

|                                                                                                                                                                                                               |                                |      |
|---------------------------------------------------------------------------------------------------------------------------------------------------------------------------------------------------------------|--------------------------------|------|
| coiled-coil domain containing 189                                                                                                                                                                             | CCDC189                        | 0,97 |
| four and a half LIM domains 5                                                                                                                                                                                 | FHL5                           | 0,97 |
| ring finger protein 186                                                                                                                                                                                       | RNF186                         | 0,97 |
| cadherin 19, type 2                                                                                                                                                                                           | CDH19                          | 0,97 |
| OMA1 zinc metallopeptidase                                                                                                                                                                                    | OMA1                           | 0,97 |
| uncharacterized LOC401052; Salzman2013 ANNOTATED, coding, INTERNAL, OVERLAPTX, OVEXON, UTR5 best transcript NM_001008737; novel transcript; Transcript Identified by AceView, Entrez Gene ID(s) 401052; 55831 | LOC401052; AC022007.5; TMEM111 | 0,97 |
| olfactory receptor, family 10, subfamily P, member 1                                                                                                                                                          | OR10P1                         | 0,97 |
| chromosome 9 open reading frame 139                                                                                                                                                                           | C9orf139                       | 0,97 |
| inositol polyphosphate-5-phosphatase D                                                                                                                                                                        | INPP5D                         | 0,97 |
| ATPase, Na+/K+ transporting, alpha 3 polypeptide                                                                                                                                                              | ATP1A3                         | 0,97 |
| fructose-1,6-bisphosphatase 1                                                                                                                                                                                 | FBP1                           | 0,97 |
| tensin 1                                                                                                                                                                                                      | TNS1                           | 0,97 |
| progesterone immunomodulatory binding factor 1                                                                                                                                                                | PIBF1                          | 0,97 |
| LRP2 binding protein                                                                                                                                                                                          | LRP2BP                         | 0,97 |
| dual specificity tyrosine-(Y)-phosphorylation regulated kinase 1B                                                                                                                                             | DYRK1B                         | 0,97 |
| tripartite motif containing 11; microRNA 6742                                                                                                                                                                 | TRIM11; MIR6742                | 0,97 |
| aldehyde dehydrogenase 1 family, member A1                                                                                                                                                                    | ALDH1A1                        | 0,97 |
| secreted frizzled-related protein 1                                                                                                                                                                           | SFRP1                          | 0,97 |
| GTPase, IMAP family member 8                                                                                                                                                                                  | GIMAP8                         | 0,97 |
| islet amyloid polypeptide                                                                                                                                                                                     | IAPP                           | 0,97 |
| leucine zipper, down-regulated in cancer 1                                                                                                                                                                    | LDOC1                          | 0,97 |
| zinc finger, SWIM-type containing 7                                                                                                                                                                           | ZSWIM7                         | 0,97 |
| ribosomal protein S6 kinase, 90kDa, polypeptide 1                                                                                                                                                             | RPS6KA1                        | 0,97 |
| transmembrane protein 210                                                                                                                                                                                     | TMEM210                        | 0,97 |
| SH3 and cysteine rich domain 2                                                                                                                                                                                | STAC2                          | 0,97 |
| excision repair cross-complementation group 6; ERCC6-PGBD3 readthrough; piggyBac transposable element derived 3                                                                                               | ERCC6; ERCC6-PGBD3; PGBD3      | 0,97 |
| serine/arginine-rich splicing factor 6                                                                                                                                                                        | SRSF6                          | 0,97 |
| keratin associated protein 9-4                                                                                                                                                                                | KRTAP9-4                       | 0,97 |
| bone morphogenetic protein 2                                                                                                                                                                                  | BMP2                           | 0,97 |
| heme oxygenase 2                                                                                                                                                                                              | HMOX2                          | 0,97 |
| FUN14 domain containing 1                                                                                                                                                                                     | FUNDC1                         | 0,97 |
| fibroblast growth factor binding protein 3                                                                                                                                                                    | FGFBP3                         | 0,97 |
| proline rich 29                                                                                                                                                                                               | PRR29                          | 0,97 |
| CCAAT/enhancer binding protein (C/EBP), epsilon                                                                                                                                                               | CEBPE                          | 0,97 |
| odorant binding protein 2B                                                                                                                                                                                    | OBP2B                          | 0,97 |
| FGR proto-oncogene, Src family tyrosine kinase                                                                                                                                                                | FGR                            | 0,97 |
| myosin, heavy chain 7, cardiac muscle, beta                                                                                                                                                                   | MYH7                           | 0,97 |

|                                                                                         |                |      |
|-----------------------------------------------------------------------------------------|----------------|------|
| signal transducer and activator of transcription 4                                      | STAT4          | 0,97 |
| DNA (cytosine-5-)-methyltransferase 3-like                                              | DNMT3L         | 0,97 |
| heart and neural crest derivatives expressed 2                                          | HAND2          | 0,97 |
| dipeptidyl-peptidase 3                                                                  | DPP3           | 0,97 |
| tolloid like 1                                                                          | TLL1           | 0,97 |
| teratocarcinoma-derived growth factor 1                                                 | TDGF1          | 0,97 |
| sirtuin 6                                                                               | SIRT6          | 0,97 |
| G protein-coupled receptor 37 like 1                                                    | GPR37L1        | 0,96 |
| methyltransferase like 2A                                                               | METTL2A        | 0,96 |
| kelch-like family member 30                                                             | KLHL30         | 0,96 |
| adrenoceptor beta 2, surface                                                            | ADRB2          | 0,96 |
| olfactory receptor, family 1, subfamily I, member 1                                     | OR1I1          | 0,96 |
| solute carrier family 16, member 11                                                     | SLC16A11       | 0,96 |
| parathyroid hormone                                                                     | PTH            | 0,96 |
| Zhang2013 ALT_ACCEPTOR, ALT_DONOR, coding, INTERNAL, intronic best transcript NM_001127 | AP1B1          | 0,96 |
| solute carrier family 35, member A4                                                     | SLC35A4        | 0,96 |
| calcium channel, voltage-dependent, R type, alpha 1E subunit                            | CACNA1E        | 0,96 |
| tyrosine 3-monooxygenase/tryptophan 5-monooxygenase activation protein, epsilon         | YWHAE          | 0,96 |
| interferon, alpha 13                                                                    | IFNA13         | 0,96 |
| ankyrin repeat domain 7                                                                 | ANKRD7         | 0,96 |
| interleukin 25                                                                          | IL25           | 0,96 |
| gamma-aminobutyric acid (GABA) A receptor, delta                                        | GABRD          | 0,96 |
| zinc finger, DHHC-type containing 11B                                                   | ZDHHC11B       | 0,96 |
| keratin 78, type II                                                                     | KRT78          | 0,96 |
| carbohydrate (N-acetylglucosamine 6-O) sulfotransferase 5                               | CHST5          | 0,96 |
| adhesion G protein-coupled receptor L1                                                  | ADGRL1         | 0,96 |
| dynein, axonemal, heavy chain 9                                                         | DNAH9          | 0,96 |
| coiled-coil domain containing 144A                                                      | CCDC144A       | 0,96 |
| serine palmitoyltransferase, long chain base subunit 2                                  | SPTLC2         | 0,96 |
| cholinergic receptor, nicotinic alpha 10; nucleoporin 98kDa                             | CHRNA10; NUP98 | 0,96 |
| zona pellucida glycoprotein 4                                                           | ZP4            | 0,96 |
| sterile alpha motif domain containing 13                                                | SAMD13         | 0,96 |
| ankyrin repeat domain 24                                                                | ANKRD24        | 0,96 |
| cullin 3                                                                                | CUL3           | 0,96 |
| long intergenic non-protein coding RNA 1205                                             | LINC01205      | 0,96 |
| myosin, heavy chain 1, skeletal muscle, adult                                           | MYH1           | 0,96 |
| contactin 4                                                                             | CNTN4          | 0,96 |
| chromosome 14 open reading frame 178                                                    | C14orf178      | 0,96 |
| ankyrin repeat domain 34B                                                               | ANKRD34B       | 0,96 |
| tumor necrosis factor receptor superfamily, member 8                                    | TNFRSF8        | 0,96 |

|                                                                                                                                                                                                                         |                                         |      |
|-------------------------------------------------------------------------------------------------------------------------------------------------------------------------------------------------------------------------|-----------------------------------------|------|
| glucose-6-phosphatase, catalytic, 2                                                                                                                                                                                     | G6PC2                                   | 0,96 |
| POU6F2 antisense RNA 2 [Source:HGNC Symbol;Acc:HGNC:21887]; Salzman2013 ANTISENSE, coding, INTERNAL, intronic, OVERLAPTX best transcript NM_007252; novel transcript, antisense to POU6F2                               | POU6F2-AS2;<br>POU6F2;<br>AC011292.2    | 0,96 |
| uncharacterized LOC338797; novel transcript                                                                                                                                                                             | LOC338797; RP13-507P19.2; RP13-507P19.1 | 0,96 |
| Rh blood group, D antigen                                                                                                                                                                                               | RHD                                     | 0,96 |
| ribonuclease P/MRP 14kDa subunit                                                                                                                                                                                        | RPP14                                   | 0,96 |
| potassium channel tetramerization domain containing 9                                                                                                                                                                   | KCTD9                                   | 0,96 |
| disco-interacting protein 2 homolog B                                                                                                                                                                                   | DIP2B                                   | 0,96 |
| katanin p80 (WD repeat containing) subunit B 1                                                                                                                                                                          | KATNB1                                  | 0,96 |
| CD48 molecule                                                                                                                                                                                                           | CD48                                    | 0,96 |
| intercellular adhesion molecule 3                                                                                                                                                                                       | ICAM3                                   | 0,96 |
| T-cell acute lymphocytic leukemia 2                                                                                                                                                                                     | TAL2                                    | 0,96 |
| FERM and PDZ domain containing 3                                                                                                                                                                                        | FRMPD3                                  | 0,96 |
| growth hormone 2                                                                                                                                                                                                        | GH2                                     | 0,96 |
| LIM homeobox 2                                                                                                                                                                                                          | LHX2                                    | 0,96 |
| protein tyrosine phosphatase, receptor type, E                                                                                                                                                                          | PTPRE                                   | 0,96 |
| dual specificity tyrosine-(Y)-phosphorylation regulated kinase 1B                                                                                                                                                       | DYRK1B                                  | 0,96 |
| Memczak2013 ANTISENSE, coding, INTERNAL, intronic best transcript NM_033360                                                                                                                                             | KRAS                                    | 0,96 |
| mutS homolog 4                                                                                                                                                                                                          | MSH4                                    | 0,96 |
| fucosyltransferase 4 (alpha (1,3) fucosyltransferase, myeloid-specific)                                                                                                                                                 | FUT4                                    | 0,96 |
| thrombomodulin                                                                                                                                                                                                          | THBD                                    | 0,96 |
| transmembrane 7 superfamily member 3                                                                                                                                                                                    | TM7SF3                                  | 0,96 |
| APOC4-APOC2 readthrough (NMD candidate); apolipoprotein C-II                                                                                                                                                            | APOC4-APOC2;<br>APOC2                   | 0,96 |
| keratin 77, type II                                                                                                                                                                                                     | KRT77                                   | 0,96 |
| myosin IB                                                                                                                                                                                                               | MYO1B                                   | 0,96 |
| prokineticin receptor 2                                                                                                                                                                                                 | PROKR2                                  | 0,96 |
| Homo sapiens polyhomeotic homolog 1 (Drosophila), mRNA (cDNA clone MGC:87926 IMAGE:5788132), complete cds.; Homo sapiens polyhomeotic homolog 1 (Drosophila), mRNA (cDNA clone MGC:189745 IMAGE:9057069), complete cds. | PHC1                                    | 0,96 |
| glutamate receptor, metabotropic 5                                                                                                                                                                                      | GRM5                                    | 0,96 |
| fatty acid binding protein 9, testis                                                                                                                                                                                    | FABP9                                   | 0,96 |
| dynamin 2                                                                                                                                                                                                               | DNM2                                    | 0,96 |
| formin 1                                                                                                                                                                                                                | FMN1                                    | 0,96 |
| schlafen family member 12                                                                                                                                                                                               | SLFN12                                  | 0,96 |
| zinc finger protein 705C, pseudogene                                                                                                                                                                                    | ZNF705CP                                | 0,96 |
| gamma-aminobutyric acid (GABA) A receptor, pi                                                                                                                                                                           | GABRP                                   | 0,96 |

|                                                                                                                      |                           |      |
|----------------------------------------------------------------------------------------------------------------------|---------------------------|------|
| Charcot-Leyden crystal galectin                                                                                      | CLC                       | 0,96 |
| EPH receptor B3                                                                                                      | EPHB3                     | 0,96 |
| cytokine receptor-like factor 2                                                                                      | CRLF2                     | 0,96 |
| enolase 1, (alpha)                                                                                                   | ENO1                      | 0,96 |
| replication protein A1                                                                                               | RPA1                      | 0,96 |
| zinc finger protein 671                                                                                              | ZNF671                    | 0,96 |
| phosphofurin acidic cluster sorting protein 2                                                                        | PACS2                     | 0,96 |
| zinc finger protein 774                                                                                              | ZNF774                    | 0,96 |
| chimerin 2                                                                                                           | CHN2                      | 0,96 |
| defensin, alpha 5, Paneth cell-specific                                                                              | DEFA5                     | 0,96 |
| MOB kinase activator 2                                                                                               | MOB2                      | 0,96 |
| KRAB box domain containing 1                                                                                         | KRBOX1                    | 0,96 |
| phosphoglucomutase 2                                                                                                 | PGM2                      | 0,96 |
| uncharacterized LOC497048; uncharacterized LOC497048<br>[Source:EntrezGene;Acc:497048]; putative novel<br>transcript | KU-MEL-3; RP4-<br>529N6.1 | 0,96 |
| mitochondrial translational release factor 1                                                                         | MTRF1                     | 0,96 |
| polyribonucleotide nucleotidyltransferase 1                                                                          | PNPT1                     | 0,96 |
| CD33 molecule                                                                                                        | CD33                      | 0,96 |
| chorionic gonadotropin, beta polypeptide 1                                                                           | CGB1                      | 0,96 |
| G protein-coupled receptor 182                                                                                       | GPR182                    | 0,96 |
| nucleolar protein with MIF4G domain 1                                                                                | NOM1                      | 0,96 |
| prepronociceptin                                                                                                     | PNOC                      | 0,96 |
| zinc finger protein 154                                                                                              | ZNF154                    | 0,96 |
| sema domain, immunoglobulin domain (Ig), short basic<br>domain, secreted, (semaphorin) 3E                            | SEMA3E                    | 0,96 |
| DPP9 antisense RNA 1                                                                                                 | DPP9-AS1                  | 0,96 |
| transmembrane protein 81                                                                                             | TMEM81                    | 0,96 |
| immunoglobulin superfamily, member 22                                                                                | IGSF22                    | 0,96 |
| olfactory receptor, family 2, subfamily L, member 13                                                                 | OR2L13                    | 0,96 |
| protease, serine 27                                                                                                  | PRSS27                    | 0,96 |
| membrane-spanning 4-domains, subfamily A, member 7                                                                   | MS4A7                     | 0,96 |
| sodium channel, non voltage gated 1 beta subunit                                                                     | SCNN1B                    | 0,96 |
| keratin associated protein 4-3                                                                                       | KRTAP4-3                  | 0,96 |
| membrane metallo-endopeptidase                                                                                       | MME                       | 0,96 |
| guanylate cyclase activator 1A (retina)                                                                              | GUCA1A                    | 0,96 |
| ELOVL fatty acid elongase 3                                                                                          | ELOVL3                    | 0,96 |
| chorionic somatomammotropin hormone 1 (placental<br>lactogen)                                                        | CSH1                      | 0,96 |
| chromosome 1 open reading frame 195                                                                                  | C1orf195                  | 0,96 |
| transmembrane 4 L six family member 20                                                                               | TM4SF20                   | 0,96 |
| CD28 molecule                                                                                                        | CD28                      | 0,96 |
| small G protein signaling modulator 1                                                                                | SGSM1                     | 0,96 |

|                                                                                                                                                                                            |                                          |      |
|--------------------------------------------------------------------------------------------------------------------------------------------------------------------------------------------|------------------------------------------|------|
| wingless-type MMTV integration site family, member 10A                                                                                                                                     | WNT10A                                   | 0,96 |
| olfactory receptor, family 4, subfamily C, member 11                                                                                                                                       | OR4C11                                   | 0,96 |
| solute carrier family 16 (monocarboxylate transporter), member 1                                                                                                                           | SLC16A1                                  | 0,96 |
| TBC1D22A antisense RNA 1                                                                                                                                                                   | TBC1D22A-AS1                             | 0,96 |
| transcription elongation factor B polypeptide 3C (elongin A3)                                                                                                                              | TCEB3C                                   | 0,96 |
| heat shock 10kDa protein 1                                                                                                                                                                 | HSPE1                                    | 0,96 |
| prohibitin 2; small Cajal body-specific RNA 12                                                                                                                                             | PHB2; SCARNA12                           | 0,96 |
| BTB and CNC homology 1, basic leucine zipper transcription factor 2                                                                                                                        | BACH2                                    | 0,96 |
| chromosome 1 open reading frame 185                                                                                                                                                        | C1orf185                                 | 0,96 |
| ALX homeobox 3                                                                                                                                                                             | ALX3                                     | 0,96 |
| small nuclear ribonucleoprotein D1 polypeptide                                                                                                                                             | SNRPD1                                   | 0,96 |
| HORMA domain containing 1                                                                                                                                                                  | HORMAD1                                  | 0,96 |
| Memczak2013 ALT_ACCEPTOR, ALT_DONOR, INTERNAL, intronic, ncRNA best transcript NR_023348                                                                                                   | GAS8                                     | 0,96 |
| interleukin 15 receptor, alpha                                                                                                                                                             | IL15RA                                   | 0,96 |
| Homo sapiens uncharacterized LOC100133669 (LOC100133669), long non-coding RNA.; Transcript Identified by AceView, Entrez Gene ID(s) 100133669; novel transcript                            | LOC100133669; RP11-273G15.2              | 0,96 |
| tetratricopeptide repeat domain 9B                                                                                                                                                         | TTC9B                                    | 0,96 |
| uncharacterized LOC105377348; Salzman2013 ANTISENSE, coding, INTERNAL, intronic, OVERLAPTX best transcript NM_181890; novel transcript, antisense UBE2D3; Transcript Identified by AceView | LOC105377348; RP11-10L12.4; UBE2D3; pugo | 0,96 |
| transition protein 2 (during histone to protamine replacement)                                                                                                                             | TNP2                                     | 0,96 |
| MLX interacting protein                                                                                                                                                                    | MLXIP                                    | 0,96 |
| catenin (cadherin-associated protein), alpha 3                                                                                                                                             | CTNNA3                                   | 0,96 |
| H1 histone family, member 0                                                                                                                                                                | H1FO                                     | 0,96 |
| uroplakin 3B                                                                                                                                                                               | UPK3B                                    | 0,96 |
| fibroblast growth factor 6                                                                                                                                                                 | FGF6                                     | 0,96 |
| chromosome 3 open reading frame 58                                                                                                                                                         | C3orf58                                  | 0,96 |
| hedgehog interacting protein                                                                                                                                                               | HHIP                                     | 0,96 |
| dystrotelin                                                                                                                                                                                | DYTN                                     | 0,96 |
| gremlin 1, DAN family BMP antagonist                                                                                                                                                       | GREM1                                    | 0,96 |
| sema domain, immunoglobulin domain (Ig), transmembrane domain (TM) and short cytoplasmic domain, (semaphorin) 4F                                                                           | SEMA4F                                   | 0,96 |
| GRB2 associated regulator of MAPK1 2                                                                                                                                                       | GAREM2                                   | 0,96 |
| prokineticin receptor 1                                                                                                                                                                    | PROKR1                                   | 0,96 |
| A kinase (PRKA) anchor protein 10                                                                                                                                                          | AKAP10                                   | 0,96 |

|                                                                                                         |                         |      |
|---------------------------------------------------------------------------------------------------------|-------------------------|------|
| kynurenine 3-monooxygenase (kynurenine 3-hydroxylase)                                                   | KMO                     | 0,96 |
| coagulation factor XII (Hageman factor)                                                                 | F12                     | 0,96 |
| component of oligomeric golgi complex 5                                                                 | COG5                    | 0,96 |
| cholinergic receptor, muscarinic 3                                                                      | CHRM3                   | 0,96 |
| chromosome 17 open reading frame 98                                                                     | C17orf98                | 0,96 |
| calcium channel, voltage-dependent, beta subunit associated regulatory protein                          | CBARP                   | 0,96 |
| apolipoprotein O-like                                                                                   | APOOL                   | 0,96 |
| F11 receptor                                                                                            | F11R                    | 0,96 |
| PR domain containing 14                                                                                 | PRDM14                  | 0,96 |
| heterogeneous nuclear ribonucleoprotein H3 (2H9)                                                        | HNRNPH3                 | 0,96 |
| interleukin 2 receptor, alpha                                                                           | IL2RA                   | 0,96 |
| Holliday junction recognition protein                                                                   | HJURP                   | 0,96 |
| cytochrome c oxidase subunit I                                                                          | COX1                    | 0,96 |
| glucagon-like peptide 1 receptor                                                                        | GLP1R                   | 0,96 |
| uncharacterized LOC400558; Transcript Identified by AceView, Entrez Gene ID(s) 400558; novel transcript | LOC400558; RP11-46C24.3 | 0,96 |
| psoriasis susceptibility 1 candidate 1                                                                  | PSORS1C1                | 0,96 |
| phospholipase A2, group IIC                                                                             | PLA2G2C                 | 0,96 |
| Memczak2013 ANTISENSE, CDS, coding, INTERNAL best transcript NM_007277                                  | EXOC3                   | 0,96 |
| Transcript Identified by AceView, Entrez Gene ID(s) 9361                                                | LONP1                   | 0,96 |
| proprotein convertase subtilisin/kexin type 1                                                           | PCSK1                   | 0,96 |
| calcium binding protein 4                                                                               | CABP4                   | 0,96 |
| phosphatase and actin regulator 1                                                                       | PHACTR1                 | 0,96 |
| bromodomain containing 7                                                                                | BRD7                    | 0,96 |
| coiled-coil domain containing 33                                                                        | CCDC33                  | 0,96 |
| high mobility group box 4                                                                               | HMGB4                   | 0,96 |
| unc-13 homolog C (C. elegans)                                                                           | UNC13C                  | 0,96 |
| Transcript Identified by AceView, Entrez Gene ID(s) 23040                                               | MYT1L                   | 0,96 |
| KH domain containing 3-like, subcortical maternal complex member                                        | KHDC3L                  | 0,96 |
| leukocyte immunoglobulin-like receptor, subfamily A (with TM domain), member 5                          | LILRA5                  | 0,96 |
| insulin-degrading enzyme                                                                                | IDE                     | 0,96 |
| zona pellucida binding protein 2                                                                        | ZBP2                    | 0,96 |
| olfactory receptor, family 51, subfamily J, member 1 (gene/pseudogene)                                  | OR51J1                  | 0,96 |
| SR-related CTD-associated factor 1                                                                      | SCAF1                   | 0,96 |
| ribosomal protein L41 pseudogene 2                                                                      | RPL41P2                 | 0,96 |
| regulator of G-protein signaling 8                                                                      | RGS8                    | 0,96 |
| NLR family, pyrin domain containing 8                                                                   | NLRP8                   | 0,96 |

|                                                                                        |                    |      |
|----------------------------------------------------------------------------------------|--------------------|------|
| major histocompatibility complex, class II, DP beta 1                                  | HLA-DPB1           | 0,96 |
| zinc finger, MYND-type containing 10                                                   | ZMYND10            | 0,96 |
| Transcript Identified by AceView, Entrez Gene ID(s) 2066                               | ERBB4              | 0,96 |
| IQ motif containing with AAA domain 1 like                                             | IQCA1L             | 0,96 |
| GTPase, IMAP family member 4                                                           | GIMAP4             | 0,96 |
| Jeck2013 ALT_ACCEPTOR, ALT_DONOR, coding, INTERNAL, intronic best transcript NM_005270 | GLI2               | 0,96 |
| somatostatin receptor 4                                                                | SSTR4              | 0,96 |
| zinc finger protein 540; ZNF571 antisense RNA 1                                        | ZNF540; ZNF571-AS1 | 0,96 |
| solute carrier family 39 (zinc transporter), member 2                                  | SLC39A2            | 0,96 |
| leucine-rich repeats and calponin homology (CH) domain containing 3                    | LRCH3              | 0,96 |
| DIRAS family, GTP-binding RAS-like 2                                                   | DIRAS2             | 0,96 |
| nucleosome assembly protein 1-like 5                                                   | NAP1L5             | 0,96 |
| radial spoke head 14 homolog (Chlamydomonas)                                           | RSPH14             | 0,96 |
| multiple PDZ domain protein                                                            | MPDZ               | 0,96 |
| calcyclin binding protein                                                              | CACYBP             | 0,96 |
| major histocompatibility complex, class II, DQ beta 1                                  | HLA-DQB1           | 0,96 |
| RAS (RAD and GEM)-like GTP-binding 1                                                   | REM1               | 0,96 |
| chromosome 2 open reading frame 88                                                     | C2orf88            | 0,96 |
| bone morphogenetic protein 8a                                                          | BMP8A              | 0,96 |
| thymus, brain and testes associated                                                    | TBATA              | 0,96 |
| cadherin 12, type 2 (N-cadherin 2)                                                     | CDH12              | 0,96 |
| Rh blood group, CcEe antigens                                                          | RHCE               | 0,96 |
| death effector domain containing                                                       | DEDD               | 0,96 |
| iron-sulfur cluster assembly enzyme                                                    | ISCU               | 0,96 |
| phospholipase C, eta 2                                                                 | PLCH2              | 0,96 |
| mago homolog B, exon junction complex core component                                   | MAGOHB             | 0,96 |
| serine peptidase inhibitor, Kunitz type, 2                                             | SPINT2             | 0,96 |
| RAB19, member RAS oncogene family                                                      | RAB19              | 0,96 |
| olfactory receptor, family 2, subfamily T, member 1                                    | OR2T1              | 0,96 |
| chromosome 15 open reading frame 53                                                    | C15orf53           | 0,96 |
| Rho guanine nucleotide exchange factor 38                                              | ARHGEF38           | 0,96 |
| nicotinamide phosphoribosyltransferase                                                 | NAMPT              | 0,96 |
| transcription elongation factor A (SII)-like 2                                         | TCEAL2             | 0,96 |
| mex-3 RNA binding family member C                                                      | MEX3C              | 0,96 |
| PRAME family member 8                                                                  | PRAMEF8            | 0,96 |
| chromosome 5 open reading frame 47                                                     | C5orf47            | 0,96 |
| bone morphogenetic protein 10                                                          | BMP10              | 0,96 |
| tryptase gamma 1                                                                       | TPSG1              | 0,96 |
| K(lysine) acetyltransferase 6B                                                         | KAT6B              | 0,96 |
| aldo-keto reductase family 1, member C4                                                | AKR1C4             | 0,96 |



|                                                                                           |                |      |
|-------------------------------------------------------------------------------------------|----------------|------|
| C-type lectin domain family 2, member D                                                   | CLEC2D         | 0,96 |
| olfactory receptor, family 5, subfamily M, member 3                                       | OR5M3          | 0,96 |
| p53-responsive gene 1                                                                     | PRG1           | 0,96 |
| ADAM metallopeptidase domain 8                                                            | ADAM8          | 0,96 |
| ribosomal protein S18                                                                     | RPS18          | 0,96 |
| multiple EGF-like-domains 6                                                               | MEGF6          | 0,96 |
| BMP binding endothelial regulator                                                         | BMPER          | 0,96 |
| interleukin 22                                                                            | IL22           | 0,96 |
| potassium channel, voltage gated Shaw related subfamily C, member 4                       | KCNC4          | 0,96 |
| urotensin 2                                                                               | UTS2           | 0,96 |
| CCCTC-binding factor (zinc finger protein)                                                | CTCF           | 0,96 |
| inositol polyphosphate-5-phosphatase D                                                    | INPP5D         | 0,96 |
| X antigen family, member 2                                                                | XAGE2          | 0,96 |
| chromosome 4 open reading frame 17                                                        | C4orf17        | 0,96 |
| Transcript Identified by AceView, Entrez Gene ID(s) 3707                                  | ITPKB          | 0,96 |
| TSEN15 tRNA splicing endonuclease subunit                                                 | TSEN15         | 0,96 |
| neurturin                                                                                 | NRTN           | 0,96 |
| olfactory receptor, family 5, subfamily T, member 1                                       | OR5T1          | 0,96 |
| zinc finger with KRAB and SCAN domains 8                                                  | ZKSCAN8        | 0,96 |
| Transcript Identified by AceView, Entrez Gene ID(s) 79041                                 | TMEM38A        | 0,96 |
| peptidylprolyl isomerase A (cyclophilin A)                                                | PPIA           | 0,96 |
| solute carrier family 28 (concentrative nucleoside transporter), member 2                 | SLC28A2        | 0,96 |
| calpain 14                                                                                | CAPN14         | 0,96 |
| X antigen family, member 1B; X antigen family, member 1E                                  | XAGE1B; XAGE1E | 0,96 |
| interleukin 12 receptor, beta 1                                                           | IL12RB1        | 0,96 |
| sialic acid binding Ig-like lectin 7                                                      | SIGLEC7        | 0,96 |
| NADH dehydrogenase (ubiquinone) 1 alpha subcomplex, 6, 14kDa                              | NDUFA6         | 0,96 |
| IQ motif containing C                                                                     | IQCC           | 0,96 |
| GC-rich promoter binding protein 1                                                        | GPBP1          | 0,96 |
| ERGIC and golgi 3                                                                         | ERGIC3         | 0,96 |
| mediator complex subunit 13                                                               | MED13          | 0,96 |
| myosin XVA                                                                                | MYO15A         | 0,96 |
| WW domain containing adaptor with coiled-coil                                             | WAC            | 0,96 |
| leukocyte cell derived chemotaxin 1                                                       | LECT1          | 0,96 |
| olfactory receptor, family 1, subfamily M, member 1                                       | OR1M1          | 0,96 |
| calcium release activated channel regulator 2A                                            | CRACR2A        | 0,96 |
| tumor necrosis factor receptor superfamily, member 10d, decoy with truncated death domain | TNFRSF10D      | 0,96 |

|                                                                                        |                |      |
|----------------------------------------------------------------------------------------|----------------|------|
| solute carrier family 25 (S-adenosylmethionine carrier), member 26                     | SLC25A26       | 0,96 |
| insulin-like growth factor 2 mRNA binding protein 1                                    | IGF2BP1        | 0,96 |
| metallothionein-like 5, testis-specific (tesmin)                                       | MTL5           | 0,96 |
| keratin associated protein 9-7                                                         | KRTAP9-7       | 0,96 |
| MT-RNR2-like 6                                                                         | MTRNR2L6       | 0,96 |
| even-skipped homeobox 2                                                                | EVX2           | 0,96 |
| DEAD (Asp-Glu-Ala-Asp) box polypeptide 28                                              | DDX28          | 0,96 |
| olfactory receptor, family 6, subfamily B, member 2                                    | OR6B2          | 0,96 |
| protein phosphatase 2, regulatory subunit B, delta                                     | PPP2R2D        | 0,96 |
| prenylcysteine oxidase 1 like                                                          | PCYOX1L        | 0,96 |
| par-6 family cell polarity regulator alpha                                             | PARD6A         | 0,96 |
| nuclear fragile X mental retardation protein interacting protein 2                     | NUFIP2         | 0,96 |
| Transcript Identified by AceView, Entrez Gene ID(s) 6764                               | ST5            | 0,96 |
| protease, serine, 48                                                                   | PRSS48         | 0,96 |
| Ras-like without CAAX 2                                                                | RIT2           | 0,96 |
| KIAA1549                                                                               | KIAA1549       | 0,96 |
| glucosaminyl (N-acetyl) transferase 6 [Source:HGNC Symbol;Acc:HGNC:21623]              | GCNT6          | 0,96 |
| glutaredoxin, cysteine rich 1                                                          | GRXCR1         | 0,96 |
| pogo transposable element with ZNF domain                                              | POGZ           | 0,96 |
| X-linked Kx blood group related, Y-linked 2; X-linked Kx blood group related, Y-linked | XKRY2; XKRY    | 0,96 |
| CD160 molecule                                                                         | CD160          | 0,96 |
| Memczak2013 ANTISENSE, CDS, coding, INTERNAL, UTR3 best transcript NM_001127457        | CRY2           | 0,96 |
| retinoblastoma binding protein 8; microRNA 4741                                        | RBBP8; MIR4741 | 0,96 |
| histone cluster 1, H4I                                                                 | HIST1H4L       | 0,96 |
| phosphatidylinositol-4-phosphate 3-kinase, catalytic subunit type 2 alpha              | PIK3C2A        | 0,96 |
| TBC1 domain family, member 3L                                                          | TBC1D3L        | 0,96 |
| cerebellin 1 precursor                                                                 | CBLN1          | 0,96 |
| colipase-like 2                                                                        | CLPSL2         | 0,96 |
| peptidylprolyl isomerase (cyclophilin)-like 2                                          | PPIL2          | 0,96 |
| replication factor C subunit 2                                                         | RFC2           | 0,96 |
| olfactory receptor, family 5, subfamily A, member 1                                    | OR5A1          | 0,96 |
| ring finger protein 138, E3 ubiquitin protein ligase                                   | RNF138         | 0,96 |
| olfactory receptor, family 6, subfamily T, member 1                                    | OR6T1          | 0,96 |
| FIC domain containing                                                                  | FICD           | 0,96 |
| calcium channel, voltage-dependent, alpha 2/delta subunit 3                            | CACNA2D3       | 0,96 |
| karyopherin alpha 5 (importin alpha 6)                                                 | KPNA5          | 0,96 |
| cystatin D                                                                             | CST5           | 0,96 |

|                                                                                    |                       |      |
|------------------------------------------------------------------------------------|-----------------------|------|
| T-box 5                                                                            | TBX5                  | 0,96 |
| toll-like receptor 1                                                               | TLR1                  | 0,96 |
| chromosome X open reading frame 51A; chromosome X open reading frame 51B           | CXorf51A;<br>CXorf51B | 0,96 |
| glycerophosphodiester phosphodiesterase domain containing 2                        | GDPD2                 | 0,96 |
| collagen, type VI, alpha 5                                                         | COL6A5                | 0,96 |
| gamma-aminobutyric acid (GABA) A receptor, rho 1                                   | GABRR1                | 0,96 |
| neuronal pentraxin I                                                               | NPTX1                 | 0,96 |
| ovo-like zinc finger 1                                                             | OVOL1                 | 0,96 |
| Transcript Identified by AceView, Entrez Gene ID(s) 23670                          | TMEM2                 | 0,96 |
| transmembrane protein 116                                                          | TMEM116               | 0,96 |
| zinc finger protein 775                                                            | ZNF775                | 0,96 |
| nephrosis 2, idiopathic, steroid-resistant (podocin)                               | NPHS2                 | 0,96 |
| dynein regulatory complex subunit 3                                                | DRC3                  | 0,96 |
| chaperonin containing TCP1, subunit 8 (theta)                                      | CCT8                  | 0,96 |
| Zic family member 1                                                                | ZIC1                  | 0,96 |
| DNA-damage-inducible transcript 4-like                                             | DDIT4L                | 0,96 |
| STAU2 antisense RNA 1                                                              | STAU2-AS1             | 0,96 |
| basic charge, Y-linked, 2C                                                         | BPY2C                 | 0,96 |
| NADH dehydrogenase (ubiquinone) 1 alpha subcomplex, 6, 14kDa                       | NDUFA6                | 0,96 |
| sterile alpha motif domain containing 3                                            | SAMD3                 | 0,96 |
| protein-O-mannosyltransferase 1                                                    | POMT1                 | 0,96 |
| olfactory receptor, family 2, subfamily A, member 1                                | OR2A1                 | 0,96 |
| RAB40A, member RAS oncogene family                                                 | RAB40A                | 0,96 |
| ADAM metalloproteinase with thrombospondin type 1 motif 20                         | ADAMTS20              | 0,96 |
| component of oligomeric golgi complex 7                                            | COG7                  | 0,96 |
| taxilin beta                                                                       | TXLNB                 | 0,96 |
| capping protein (actin filament) muscle Z-line, alpha 3                            | CAPZA3                | 0,96 |
| fibrous sheath CABYR binding protein                                               | FSCB                  | 0,96 |
| keratin associated protein 19-2                                                    | KRTAP19-2             | 0,96 |
| uridine phosphorylase 2                                                            | UPP2                  | 0,96 |
| oligodendrocytic myelin paranodal and inner loop protein                           | OPALIN                | 0,96 |
| ankyrin repeat and SOCS box containing 12                                          | ASB12                 | 0,96 |
| carboxypeptidase A2 (pancreatic)                                                   | CPA2                  | 0,96 |
| zinc finger protein 543                                                            | ZNF543                | 0,95 |
| chromosome 1 open reading frame 111                                                | C1orf111              | 0,95 |
| potassium channel, calcium activated large conductance subfamily M alpha, member 1 | KCNMA1                | 0,95 |
| odorant binding protein 2A                                                         | OBP2A                 | 0,95 |
| outer dense fiber of sperm tails 2                                                 | ODF2                  | 0,95 |

|                                                                                                                                      |                                |      |
|--------------------------------------------------------------------------------------------------------------------------------------|--------------------------------|------|
| tubulin, alpha 1c                                                                                                                    | TUBA1C                         | 0,95 |
| Transcript Identified by AceView, Entrez Gene ID(s)<br>146167                                                                        | SLC38A8                        | 0,95 |
| peptidylprolyl isomerase (cyclophilin)-like 3                                                                                        | PPIL3                          | 0,95 |
| CUB domain containing protein 2                                                                                                      | CDCP2                          | 0,95 |
| protein phosphatase 1, regulatory subunit 42                                                                                         | PPP1R42                        | 0,95 |
| Memczak2013 ALT_ACCEPTOR, ALT_DONOR, coding,<br>INTERNAL, intronic best transcript NM_001003800                                      | BICD2                          | 0,95 |
| fibrillin 1                                                                                                                          | FBN1                           | 0,95 |
| chromosome 22 open reading frame 39; histone cell cycle<br>regulator                                                                 | C22orf39; HIRA                 | 0,95 |
| chromosome 3 open reading frame 36                                                                                                   | C3orf36                        | 0,95 |
| lactate dehydrogenase C                                                                                                              | LDHC                           | 0,95 |
| Rap guanine nucleotide exchange factor 1                                                                                             | RAPGEF1                        | 0,95 |
| double homeobox 4                                                                                                                    | DUX4                           | 0,95 |
| F-box and leucine-rich repeat protein 6                                                                                              | FBXL6                          | 0,95 |
| inhibin beta A                                                                                                                       | INHBA                          | 0,95 |
| Memczak2013 ANTISENSE, coding, intronic,<br>upstream_start, UTR5 best transcript NM_001161357                                        | FCHO1                          | 0,95 |
| TP53 target 3D                                                                                                                       | TP53TG3D                       | 0,95 |
| uncharacterized LOC100130705; putative novel transcript                                                                              | LOC100130705;<br>RP11-309L24.4 | 0,95 |
| Alport syndrome, mental retardation, midface hypoplasia<br>and elliptocytosis chromosomal region gene 1                              | AMMECR1                        | 0,95 |
| PX domain containing serine/threonine kinase                                                                                         | PXK                            | 0,95 |
| potassium channel, inwardly rectifying subfamily J,<br>member 16                                                                     | KCNJ16                         | 0,95 |
| goosecoid homeobox 2                                                                                                                 | GSC2                           | 0,95 |
| uncharacterized LOC101929319; Salzman2013<br>ANTISENSE, CDS, coding, INTERNAL, intronic, OVCODE,<br>OVEXON best transcript NM_007115 | LOC101929319;<br>TNFAIP6       | 0,95 |
| olfactory receptor, family 2, subfamily A, member 12                                                                                 | OR2A12                         | 0,95 |
| hemoglobin, beta                                                                                                                     | HBB                            | 0,95 |
| staufen double-stranded RNA binding protein 1                                                                                        | STAU1                          | 0,95 |
| MX dynamin-like GTPase 2                                                                                                             | MX2                            | 0,95 |
| ring finger protein 212                                                                                                              | RNF212                         | 0,95 |
| small EDRK-rich factor 1B (centromeric); small EDRK-rich<br>factor 1A (telomeric)                                                    | SERF1B; SERF1A                 | 0,95 |
| small EDRK-rich factor 1A (telomeric)                                                                                                | SERF1A                         | 0,95 |
| geminin coiled-coil domain containing                                                                                                | GMNC                           | 0,95 |
| RAS protein activator like 1 (GAP1 like)                                                                                             | RASAL1                         | 0,95 |
| group-specific component (vitamin D binding protein)                                                                                 | GC                             | 0,95 |
| ankyrin repeat domain 37                                                                                                             | ANKRD37                        | 0,95 |
| prion protein (testis specific)                                                                                                      | PRNT                           | 0,95 |

|                                                                                           |                |      |
|-------------------------------------------------------------------------------------------|----------------|------|
| trace amine associated receptor 8                                                         | TAAR8          | 0,95 |
| protein kinase, cAMP-dependent, catalytic, gamma                                          | PRKACG         | 0,95 |
| Memczak2013 ALT_ACCEPTOR, ALT_DONOR, coding, INTERNAL, intronic best transcript NM_018717 | MAML3          | 0,95 |
| chromosome 18 open reading frame 65                                                       | C18orf65       | 0,95 |
| MAP3K12 binding inhibitory protein 1                                                      | MBIP           | 0,95 |
| NADH dehydrogenase (ubiquinone) 1 alpha subcomplex, 8, 19kDa                              | NDUFA8         | 0,95 |
| cholinergic receptor, muscarinic 1                                                        | CHRM1          | 0,95 |
| opioid receptor, kappa 1                                                                  | OPRK1          | 0,95 |
| RANBP2-like and GRIP domain containing 1; RANBP2-like and GRIP domain containing 2        | RGPD1; RGPD2   | 0,95 |
| Rap guanine nucleotide exchange factor like 1                                             | RAPGEFL1       | 0,95 |
| small integral membrane protein 6                                                         | SMIM6          | 0,95 |
| secretoglobin, family 3A, member 2                                                        | SCGB3A2        | 0,95 |
| actin-related protein T3                                                                  | ACTRT3         | 0,95 |
| myosin binding protein C, cardiac                                                         | MYBPC3         | 0,95 |
| transmembrane protein 200C                                                                | TMEM200C       | 0,95 |
| chromosome 1 open reading frame 234                                                       | C1orf234       | 0,95 |
| transcription elongation factor A (SII)-like 3                                            | TCEAL3         | 0,95 |
| phosphatidylinositol-4-phosphate 3-kinase, catalytic subunit type 2 gamma                 | PIK3C2G        | 0,95 |
| phosphatidylinositol transfer protein, membrane-associated 2                              | PITPNM2        | 0,95 |
| mitochondrial antiviral signaling protein                                                 | MAVS           | 0,95 |
| zinc finger protein 93                                                                    | ZNF93          | 0,95 |
| GDNF family receptor alpha like                                                           | GFRAL          | 0,95 |
| keratin associated protein 19-3                                                           | KRTAP19-3      | 0,95 |
| integrator complex subunit 3                                                              | INTS3          | 0,95 |
| olfactory receptor, family 51, subfamily F, member 2                                      | OR51F2         | 0,95 |
| YY1 transcription factor; microRNA 6764                                                   | YY1; MIR6764   | 0,95 |
| beta-carotene oxygenase 2; ribosomal protein S12 pseudogene 21                            | BCO2; RPS12P21 | 0,95 |
| deleted in esophageal cancer 1                                                            | DEC1           | 0,95 |
| proline rich 32                                                                           | PRR32          | 0,95 |
| MKRN2 opposite strand                                                                     | MKRN2OS        | 0,95 |
| enolase family member 4                                                                   | ENO4           | 0,95 |
| zinc finger, CCHC domain containing 16                                                    | ZCCHC16        | 0,95 |
| BR serine/threonine kinase 2                                                              | BRSK2          | 0,95 |
| loricrin                                                                                  | LOR            | 0,95 |
| energy homeostasis associated                                                             | ENHO           | 0,95 |
| Rho guanine nucleotide exchange factor 19                                                 | ARHGEF19       | 0,95 |
| glyceraldehyde-3-phosphate dehydrogenase, spermatogenic                                   | GAPDHS         | 0,95 |
| coiled-coil-helix-coiled-coil-helix domain containing 6                                   | CHCHD6         | 0,95 |

|                                                                                                          |                                         |      |
|----------------------------------------------------------------------------------------------------------|-----------------------------------------|------|
| hes family bHLH transcription factor 2                                                                   | HES2                                    | 0,95 |
| potassium channel, two pore domain subfamily K, member 5                                                 | KCNK5                                   | 0,95 |
| family with sequence similarity 172, member A; POU domain class 5, transcription factor 2; microRNA 2277 | FAM172A;<br>POU5F2;<br>MIR2277          | 0,95 |
| olfactory receptor, family 1, subfamily A, member 2                                                      | OR1A2                                   | 0,95 |
| family with sequence similarity 60, member A                                                             | FAM60A                                  | 0,95 |
| cerebellar degeneration related protein 2                                                                | CDR2                                    | 0,95 |
| reticulon 2                                                                                              | RTN2                                    | 0,95 |
| DEAD (Asp-Glu-Ala-Asp) box polypeptide 31                                                                | DDX31                                   | 0,95 |
| 5-hydroxytryptamine (serotonin) receptor 4, G protein-coupled                                            | HTR4                                    | 0,95 |
| Fc fragment of IgG, low affinity IIIa, receptor (CD16a)                                                  | FCGR3A                                  | 0,95 |
| uncharacterized LOC101927844; Transcript Identified by AceView                                           | LOC101927844;<br>serfawbu               | 0,95 |
| Rhox homeobox family, member 2; Rhox homeobox family, member 2B                                          | RHOXF2;<br>RHOXF2B                      | 0,95 |
| alpha 1,3-galactosyltransferase 2                                                                        | A3GALT2                                 | 0,95 |
| zinc finger CCCH-type containing 15                                                                      | ZC3H15                                  | 0,95 |
| G protein-coupled receptor kinase 7                                                                      | GRK7                                    | 0,95 |
| T-box 4                                                                                                  | TBX4                                    | 0,95 |
| mex-3 RNA binding family member A                                                                        | MEX3A                                   | 0,95 |
| transmembrane protein 71                                                                                 | TMEM71                                  | 0,95 |
| POU class 3 homeobox 3                                                                                   | POU3F3                                  | 0,95 |
| adaptor-related protein complex 5, mu 1 subunit                                                          | AP5M1                                   | 0,95 |
| solute carrier family 35, member F3                                                                      | SLC35F3                                 | 0,95 |
| mediator complex subunit 23                                                                              | MED23                                   | 0,95 |
| pygopus family PHD finger 1                                                                              | PYGO1                                   | 0,95 |
| zinc finger, BED-type containing 4                                                                       | ZBED4                                   | 0,95 |
| iroquois homeobox 1                                                                                      | IRX1                                    | 0,95 |
| kallikrein 1                                                                                             | KLK1                                    | 0,95 |
| lysyl oxidase-like 1                                                                                     | LOXL1                                   | 0,95 |
| ST8 alpha-N-acetyl-neuraminide alpha-2,8-sialyltransferase 1                                             | ST8SIA1                                 | 0,95 |
| keratin associated protein 10-11; keratin associated protein 12-3; keratin associated protein 10-12      | KRTAP10-11;<br>KRTAP12-3;<br>KRTAP10-12 | 0,95 |
| zinc finger protein 140                                                                                  | ZNF140                                  | 0,95 |
| 5-nucleotidase domain containing 4                                                                       | NT5DC4                                  | 0,95 |
| primase and DNA directed polymerase                                                                      | PRIMPOL                                 | 0,95 |
| Transcript Identified by AceView, Entrez Gene ID(s) 387535                                               | HCRP1                                   | 0,95 |
| transforming growth factor beta receptor associated protein 1                                            | TGFBRAP1                                | 0,95 |

|                                                                             |                                   |      |
|-----------------------------------------------------------------------------|-----------------------------------|------|
| mitochondrial ribosomal protein L35                                         | MRPL35                            | 0,95 |
| serologically defined colon cancer antigen 8                                | SDCCAG8                           | 0,95 |
| mannosyl (beta-1,4-)-glycoprotein beta-1,4-N-acetylglucosaminyltransferase  | MGAT3                             | 0,95 |
| proline rich 3                                                              | PRR3                              | 0,95 |
| tripartite motif containing 69                                              | TRIM69                            | 0,95 |
| age-related maculopathy susceptibility 2                                    | ARMS2                             | 0,95 |
| transmembrane protein 212                                                   | TMEM212                           | 0,95 |
| RWD domain containing 3; transmembrane protein 56; TMEM56-RWDD3 readthrough | RWDD3;<br>TMEM56;<br>TMEM56-RWDD3 | 0,95 |
| olfactory receptor, family 13, subfamily C, member 5                        | OR13C5                            | 0,95 |
| solute carrier family 25, member 38                                         | SLC25A38                          | 0,95 |
| sperm adhesion molecule 1 (PH-20 hyaluronidase, zona pellucida binding)     | SPAM1                             | 0,95 |
| sidekick cell adhesion molecule 2                                           | SDK2                              | 0,95 |
| guanine nucleotide binding protein-like 1                                   | GNL1                              | 0,95 |
| heterogeneous nuclear ribonucleoprotein C-like 2                            | HNRNPCL2                          | 0,95 |
| MSANTD3-TMEFF1 readthrough                                                  | MSANTD3-<br>TMEFF1                | 0,95 |
| peroxiredoxin 5                                                             | PRDX5                             | 0,95 |
| cyclin Y like 1; microRNA 4775                                              | CCNYL1; MIR4775                   | 0,95 |
| NIMA-related kinase 7                                                       | NEK7                              | 0,95 |
| Transcript Identified by AceView, Entrez Gene ID(s) 285596                  | FAM153A                           | 0,95 |
| isocitrate dehydrogenase 3 (NAD+) alpha                                     | IDH3A                             | 0,95 |
| testis expressed 14                                                         | TEX14                             | 0,95 |
| melanin-concentrating hormone receptor 1                                    | MCHR1                             | 0,95 |
| F-box protein 16                                                            | FBXO16                            | 0,95 |
| zinc finger RNA binding protein 2                                           | ZFR2                              | 0,95 |
| SRY box 17                                                                  | SOX17                             | 0,95 |
| olfactory receptor, family 8, subfamily S, member 1                         | OR8S1                             | 0,95 |
| tubulin tyrosine ligase-like family member 4                                | TTLL4                             | 0,95 |
| tripartite motif-containing 51                                              | TRIM51                            | 0,95 |
| calcium channel, voltage-dependent, gamma subunit 2                         | CACNG2                            | 0,95 |
| ubiquinol-cytochrome c reductase core protein I                             | UQCRC1                            | 0,95 |
| chromosome 5 open reading frame 64                                          | C5orf64                           | 0,95 |
| apratxin                                                                    | APTX                              | 0,95 |
| carbonic anhydrase XI                                                       | CA11                              | 0,95 |
| divergent-paired related homeobox                                           | DPRX                              | 0,95 |
| thrombospondin type 1 domain containing 7B                                  | THSD7B                            | 0,95 |
| calcium channel, voltage-dependent, gamma subunit 1                         | CACNG1                            | 0,95 |
| zinc finger protein 536                                                     | ZNF536                            | 0,95 |
| ribulose-5-phosphate-3-epimerase-like 1                                     | RPEL1                             | 0,95 |

|                                                                                                                                           |                          |      |
|-------------------------------------------------------------------------------------------------------------------------------------------|--------------------------|------|
| transporter 1, ATP-binding cassette, sub-family B (MDR/TAP)                                                                               | TAP1                     | 0,95 |
| mindbomb E3 ubiquitin protein ligase 1                                                                                                    | MIB1                     | 0,95 |
| V-set and transmembrane domain containing 5                                                                                               | VSTM5                    | 0,95 |
| BCL2-like 14 (apoptosis facilitator)                                                                                                      | BCL2L14                  | 0,95 |
| UPF0607 protein ENSP00000381418-like; Putative UPF0607 protein ENSP00000381418 [Source:UniProtKB/Swiss-Prot;Acc:A8MU76]                   | LOC729159; RP11-457D20.2 | 0,95 |
| G protein-coupled receptor 88                                                                                                             | GPR88                    | 0,95 |
| RAD50 interactor 1                                                                                                                        | RINT1                    | 0,95 |
| solute carrier family 1 (glutamate transporter), member 7                                                                                 | SLC1A7                   | 0,95 |
| polycystic kidney disease 1-like 3                                                                                                        | PKD1L3                   | 0,95 |
| SEC16 homolog A, endoplasmic reticulum export factor                                                                                      | SEC16A                   | 0,95 |
| EPH receptor B6                                                                                                                           | EPHB6                    | 0,95 |
| pinin, desmosome associated protein                                                                                                       | PNN                      | 0,95 |
| msh homeobox 2                                                                                                                            | MSX2                     | 0,95 |
| ADAM metalloproteinase domain 33                                                                                                          | ADAM33                   | 0,95 |
| Synthetic construct Homo sapiens clone IMAGE:100063377, MGC:190767 ribosomal protein L41 (RPL41) mRNA, encodes complete protein.          | RPL41                    | 0,95 |
| calcitonin receptor                                                                                                                       | CALCR                    | 0,95 |
| mucin-like 1                                                                                                                              | MUCL1                    | 0,95 |
| forkhead box I3                                                                                                                           | FOXI3                    | 0,95 |
| V-set and immunoglobulin domain containing 8                                                                                              | VSIG8                    | 0,95 |
| interleukin 36, alpha                                                                                                                     | IL36A                    | 0,95 |
| homeobox B9                                                                                                                               | HOXB9                    | 0,95 |
| lymphocyte antigen 6 complex, locus G6D                                                                                                   | LY6G6D                   | 0,95 |
| collagen, type IV, alpha 1                                                                                                                | COL4A1                   | 0,95 |
| complement component (3b/4b) receptor 1-like                                                                                              | CR1L                     | 0,95 |
| leucine rich repeat containing 14                                                                                                         | LRRC14                   | 0,95 |
| immunoglobulin (CD79A) binding protein 1                                                                                                  | IGBP1                    | 0,95 |
| signaling lymphocytic activation molecule family member 1                                                                                 | SLAMF1                   | 0,95 |
| POM121 transmembrane nucleoporin C                                                                                                        | POM121C                  | 0,95 |
| perilipin 1                                                                                                                               | PLIN1                    | 0,95 |
| keratin 7, type II                                                                                                                        | KRT7                     | 0,95 |
| fibroblast growth factor 14; FGF14 intronic transcript 1                                                                                  | FGF14; FGF14-IT1         | 0,95 |
| teneurin transmembrane protein 2                                                                                                          | TENM2                    | 0,95 |
| solute carrier organic anion transporter family, member 1B7 (non-functional); solute carrier organic anion transporter family, member 1B1 | SLCO1B7; SLCO1B1         | 0,95 |
| CTD nuclear envelope phosphatase 1                                                                                                        | CTDNEP1                  | 0,95 |
| frizzled class receptor 8; microRNA 4683                                                                                                  | FZD8; MIR4683            | 0,95 |
| cullin 5                                                                                                                                  | CUL5                     | 0,95 |



|                                                                        |                |      |
|------------------------------------------------------------------------|----------------|------|
| keratin associated protein 20-4                                        | KRTAP20-4      | 0,95 |
| cation channel, sperm associated 4                                     | CATSPER4       | 0,95 |
| intelectin 2                                                           | ITLN2          | 0,95 |
| R-spondin 1                                                            | RSPO1          | 0,95 |
| KRR1, small subunit (SSU) processome component,<br>homolog (yeast)     | KRR1           | 0,95 |
| solute carrier family 27 (fatty acid transporter), member<br>6         | SLC27A6        | 0,95 |
| archaelysin family metallopeptidase 1                                  | AMZ1           | 0,95 |
| kinesin family member 5C                                               | KIF5C          | 0,95 |
| apolipoprotein A-I binding protein                                     | APOA1BP        | 0,95 |
| cytochrome c oxidase subunit VIIIC                                     | COX8C          | 0,95 |
| epiphycan                                                              | EPYC           | 0,95 |
| interferon, alpha 7                                                    | IFNA7          | 0,95 |
| forkhead box H1                                                        | FOXH1          | 0,95 |
| olfactory receptor, family 6, subfamily K, member 6                    | OR6K6          | 0,95 |
| phospholipase C, delta 4                                               | PLCD4          | 0,95 |
| phosphatidylinositol glycan anchor biosynthesis class X                | PIGX           | 0,95 |
| gap junction protein beta 4                                            | GJB4           | 0,95 |
| INO80 complex subunit                                                  | INO80          | 0,95 |
| integrin alpha D                                                       | ITGAD          | 0,95 |
| RAB11A, member RAS oncogene family                                     | RAB11A         | 0,95 |
| Nanog homeobox                                                         | NANOG          | 0,95 |
| lipase, family member K                                                | LIPK           | 0,95 |
| EGF containing fibulin-like extracellular matrix protein 1             | EFEMP1         | 0,95 |
| CD99 molecule-like 2                                                   | CD99L2         | 0,95 |
| insulin induced gene 1                                                 | INSIG1         | 0,95 |
| raftlin family member 2                                                | RFTN2          | 0,95 |
| ADP-ribosyltransferase 3                                               | ART3           | 0,95 |
| ribosomal protein L36a-like                                            | RPL36AL        | 0,95 |
| mitochondrial ribosomal protein S5                                     | MRPS5          | 0,95 |
| phosphoinositide-3-kinase, regulatory subunit 4                        | PIK3R4         | 0,95 |
| corticotropin releasing hormone binding protein                        | CRHBP          | 0,95 |
| LY6/PLAUR domain containing 6B                                         | LYPD6B         | 0,95 |
| coagulation factor IX                                                  | F9             | 0,95 |
| clusterin-like 1 (retinal)                                             | CLUL1          | 0,95 |
| GRB2-associated binding protein family, member 4                       | GAB4           | 0,95 |
| potassium channel, voltage gated Shab related subfamily<br>B, member 1 | KCNB1          | 0,95 |
| dihydrouridine synthase 1-like                                         | DUS1L          | 0,95 |
| adenosine monophosphate deaminase 3                                    | AMPD3          | 0,95 |
| chromosome 12 open reading frame 54                                    | C12orf54       | 0,95 |
| hemicentin 2                                                           | HMCN2          | 0,95 |
| small proline-rich protein 2G                                          | SPRR2G         | 0,95 |
| collagen, type VII, alpha 1; microRNA 711                              | COL7A1; MIR711 | 0,95 |

|                                                                                       |                          |      |
|---------------------------------------------------------------------------------------|--------------------------|------|
| adenosine kinase; mitochondrial ribosomal protein L35 pseudogene 3                    | ADK; MRPL35P3            | 0,95 |
| uncharacterized LOC151121; novel transcript                                           | LOC151121;<br>AC079586.1 | 0,95 |
| cAMP responsive element binding protein-like 2                                        | CREBL2                   | 0,95 |
| even-skipped homeobox 1                                                               | EVX1                     | 0,95 |
| butyrobetaine (gamma), 2-oxoglutarate dioxygenase (gamma-butyrobetaine hydroxylase) 1 | BBOX1                    | 0,95 |
| dehydrogenase/reductase (SDR family) member 4 like 2                                  | DHRS4L2                  | 0,95 |
| solute carrier family 13 (sodium/sulfate symporter), member 1                         | SLC13A1                  | 0,95 |
| chloride channel, voltage-sensitive 4                                                 | CLCN4                    | 0,95 |
| matrix metallopeptidase 25                                                            | MMP25                    | 0,95 |
| PRAME family member 7                                                                 | PRAMEF7                  | 0,95 |
| long intergenic non-protein coding RNA 269                                            | LINC00269                | 0,95 |
| EH domain binding protein 1 like 1                                                    | EHBP1L1                  | 0,95 |
| Transcript Identified by AceView, Entrez Gene ID(s) 91445                             | RNF185                   | 0,95 |
| glycoprotein VI (platelet)                                                            | GP6                      | 0,95 |
| pyroglutamyl-peptidase I-like                                                         | PGPEP1L                  | 0,95 |
| tenascin C                                                                            | TNC                      | 0,95 |
| glycogenin 1                                                                          | GYG1                     | 0,95 |
| glutamate receptor, metabotropic 1                                                    | GRM1                     | 0,95 |
| BAI1-associated protein 3                                                             | BAIAP3                   | 0,95 |
| leucine zipper protein 4                                                              | LUZP4                    | 0,95 |
| integrin alpha 4                                                                      | ITGA4                    | 0,95 |
| nucleoporin 210kDa like; microRNA 5698                                                | NUP210L;<br>MIR5698      | 0,95 |
| kelch-like family member 32                                                           | KLHL32                   | 0,95 |
| aurora kinase A and ninein interacting protein                                        | AUNIP                    | 0,95 |
| FK506 binding protein 15                                                              | FKBP15                   | 0,95 |
| paired box 7                                                                          | PAX7                     | 0,95 |
| leucine-rich repeats and guanylate kinase domain containing                           | LRGUK                    | 0,95 |
| solute carrier family 16 (monocarboxylate transporter), member 7                      | SLC16A7                  | 0,95 |
| Transcript Identified by AceView, Entrez Gene ID(s) 6596                              | HLTF                     | 0,95 |
| fibulin 2                                                                             | FBLN2                    | 0,95 |
| caspase 2                                                                             | CASP2                    | 0,95 |
| chromosome 10 open reading frame 2                                                    | C10orf2                  | 0,95 |
| myeloid-associated differentiation marker-like 2                                      | MYADML2                  | 0,95 |

|                                                                                                                                                                                 |                                           |      |
|---------------------------------------------------------------------------------------------------------------------------------------------------------------------------------|-------------------------------------------|------|
| SAGA complex associated factor 29 pseudogene;<br>Transcript Identified by AceView, Entrez Gene ID(s)<br>388242; Uncharacterized protein<br>[Source:UniProtKB/TrEMBL;Acc:H0YHM3] | LOC388242;<br>LOC613038; RP11-<br>345J4.3 | 0,95 |
| microspherule protein 1                                                                                                                                                         | MCRS1                                     | 0,95 |
| myeloid cell nuclear differentiation antigen                                                                                                                                    | MNDA                                      | 0,95 |
| ajuba LIM protein                                                                                                                                                               | AJUBA                                     | 0,95 |
| transmembrane protein 151B                                                                                                                                                      | TMEM151B                                  | 0,95 |
| Transcript Identified by AceView, Entrez Gene ID(s) 3561;<br>putative novel transcript                                                                                          | RP5-1091N2.9;<br>IL2RG                    | 0,95 |
| HEAT repeat containing 6                                                                                                                                                        | HEATR6                                    | 0,95 |
| protein phosphatase 2, regulatory subunit B, beta                                                                                                                               | PPP2R5B                                   | 0,95 |
| C2 calcium-dependent domain containing 4D                                                                                                                                       | C2CD4D                                    | 0,95 |
| kelch-like family member 13                                                                                                                                                     | KLHL13                                    | 0,95 |
| Memczak2013 ANTISENSE, coding, INTERNAL, intronic<br>best transcript NM_024829                                                                                                  | PLBD1                                     | 0,95 |
| hydroxymethylbilane synthase                                                                                                                                                    | HMBS                                      | 0,95 |
| matrix metalloproteinase 28                                                                                                                                                     | MMP28                                     | 0,95 |
| tripartite motif containing 27                                                                                                                                                  | TRIM27                                    | 0,95 |
| keratin 14, type I                                                                                                                                                              | KRT14                                     | 0,95 |
| osteoclast stimulatory transmembrane protein                                                                                                                                    | OCSTAMP                                   | 0,95 |
| Transcript Identified by AceView, Entrez Gene ID(s)<br>57498; 100216337                                                                                                         | KIDINS220                                 | 0,95 |
| cytochrome P450, family 26, subfamily C, polypeptide 1                                                                                                                          | CYP26C1                                   | 0,95 |
| TLX1 neighbor                                                                                                                                                                   | TLX1NB                                    | 0,95 |
| synaptic vesicle glycoprotein 2B                                                                                                                                                | SV2B                                      | 0,95 |
| rhophilin associated tail protein 1B                                                                                                                                            | ROPN1B                                    | 0,95 |
| interleukin 13 receptor, alpha 2                                                                                                                                                | IL13RA2                                   | 0,95 |
| histidine rich carboxyl terminus 1                                                                                                                                              | HRCT1                                     | 0,95 |
| matrix metalloproteinase 16 (membrane-inserted)                                                                                                                                 | MMP16                                     | 0,95 |
| p21 protein (Cdc42/Rac)-activated kinase 4                                                                                                                                      | PAK4                                      | 0,95 |
| olfactory receptor, family 4, subfamily F, member 6                                                                                                                             | OR4F6                                     | 0,95 |
| solute carrier family 25 (mitochondrial folate carrier),<br>member 32                                                                                                           | SLC25A32                                  | 0,95 |
| insulin like growth factor binding protein 5                                                                                                                                    | IGFBP5                                    | 0,95 |
| TAR DNA binding protein                                                                                                                                                         | TARDBP                                    | 0,95 |
| POTE ankyrin domain family, member B3                                                                                                                                           | POTEB3                                    | 0,95 |
| transmembrane protein 43                                                                                                                                                        | TMEM43                                    | 0,95 |
| BOC cell adhesion associated, oncogene regulated                                                                                                                                | BOC                                       | 0,95 |
| transmembrane protease, serine 15                                                                                                                                               | TMPRSS15                                  | 0,95 |
| myostatin                                                                                                                                                                       | MSTN                                      | 0,95 |
| tRNA-yW synthesizing protein 1 homolog B (S. cerevisiae)                                                                                                                        | TYW1B                                     | 0,95 |
| cysteine/histidine-rich 1                                                                                                                                                       | CYHR1                                     | 0,95 |
| G protein-coupled receptor 153                                                                                                                                                  | GPR153                                    | 0,95 |

|                                                                                                             |                       |      |
|-------------------------------------------------------------------------------------------------------------|-----------------------|------|
| connector enhancer of kinase suppressor of Ras 2                                                            | CNKS2                 | 0,95 |
| leucyl/cystinyl aminopeptidase                                                                              | LNPEP                 | 0,95 |
| melanoma inhibitory activity; RAB4B, member RAS oncogene family; MIA-RAB4B readthrough (NMD candidate)      | MIA; RAB4B; MIA-RAB4B | 0,95 |
| G2/M-phase specific E3 ubiquitin protein ligase                                                             | G2E3                  | 0,95 |
| Jeck2013 ANTISENSE, CDS, coding, INTERNAL, OVCODE, OVEXON, UTR3 best transcript NM_001013                   | RPS9                  | 0,95 |
| LIM homeobox 9                                                                                              | LHX9                  | 0,95 |
| origin recognition complex subunit 1                                                                        | ORC1                  | 0,95 |
| fascin actin-bundling protein 2, retinal                                                                    | FSCN2                 | 0,95 |
| theg spermatid protein                                                                                      | THEG                  | 0,95 |
| sodium channel, voltage gated, type VII alpha subunit                                                       | SCN7A                 | 0,95 |
| schlafen family member 13                                                                                   | SLFN13                | 0,95 |
| lysocardiolipin acyltransferase 1                                                                           | LCLAT1                | 0,95 |
| nuclear receptor subfamily 2, group C, member 2                                                             | NR2C2                 | 0,95 |
| CD300 molecule-like family member b                                                                         | CD300LB               | 0,95 |
| nascent polypeptide-associated complex alpha subunit                                                        | NACA                  | 0,95 |
| RAD51 associated protein 2                                                                                  | RAD51AP2              | 0,95 |
| chemokine (C-C motif) ligand 13                                                                             | CCL13                 | 0,95 |
| remodeling and spacing factor 1                                                                             | RSF1                  | 0,95 |
| NIF3 NGG1 interacting factor 3-like 1                                                                       | NIF3L1                | 0,95 |
| histamine receptor H4                                                                                       | HRH4                  | 0,95 |
| RERG/RAS-like                                                                                               | RERGL                 | 0,95 |
| neuropilin (NRP) and tolloid (TLL)-like 1                                                                   | NETO1                 | 0,95 |
| Wilms tumor 1 interacting protein                                                                           | WTIP                  | 0,95 |
| coiled-coil domain containing 25                                                                            | CCDC25                | 0,95 |
| chloride channel accessory 2                                                                                | CLCA2                 | 0,95 |
| ciliary neurotrophic factor receptor                                                                        | CNTFR                 | 0,95 |
| cyclin H                                                                                                    | CCNH                  | 0,95 |
| ribosomal protein S25                                                                                       | RPS25                 | 0,95 |
| arylacetamide deacetylase-like 3                                                                            | AADACL3               | 0,95 |
| trafficking protein particle complex 4                                                                      | TRAPPC4               | 0,95 |
| aspartate-rich 1                                                                                            | DRICH1                | 0,94 |
| prolyl endopeptidase                                                                                        | PREP                  | 0,94 |
| hydroxymethylbilane synthase                                                                                | HMBS                  | 0,94 |
| malic enzyme 3, NADP(+)-dependent, mitochondrial                                                            | ME3                   | 0,94 |
| zinc finger and BTB domain containing 1                                                                     | ZBTB1                 | 0,94 |
| sec1 family domain containing 2                                                                             | SCFD2                 | 0,94 |
| interleukin 17 receptor E-like                                                                              | IL17REL               | 0,94 |
| Homo sapiens thymosin beta 15B (TMSB15B), mRNA.; Thymosin beta-15B [Source:UniProtKB/Swiss-Prot;Acc:POCG35] | TMSB15B; RP11-722G7.1 | 0,94 |
| fms-related tyrosine kinase 3                                                                               | FLT3                  | 0,94 |
| testis-specific serine kinase 4                                                                             | TSSK4                 | 0,94 |

|                                                                                         |                |      |
|-----------------------------------------------------------------------------------------|----------------|------|
| CD276 molecule                                                                          | CD276          | 0,94 |
| guanylate cyclase 1, soluble, beta 3                                                    | GUCY1B3        | 0,94 |
| ubiquitin-conjugating enzyme E2S; ubiquitin conjugating enzyme E2S pseudogene 1         | UBE2S; UBE2SP1 | 0,94 |
| partner and localizer of BRCA2                                                          | PALB2          | 0,94 |
| Zic family member 4                                                                     | ZIC4           | 0,94 |
| zinc finger protein 347                                                                 | ZNF347         | 0,94 |
| tubulin tyrosine ligase-like family member 8                                            | TTLL8          | 0,94 |
| thyroid stimulating hormone, beta                                                       | TSHB           | 0,94 |
| chromosome 3 open reading frame 79                                                      | C3orf79        | 0,94 |
| aryl-hydrocarbon receptor nuclear translocator 2; microRNA 5572                         | ARNT2; MIR5572 | 0,94 |
| olfactory receptor, family 5, subfamily AC, member 1 (gene/pseudogene)                  | OR5AC1         | 0,94 |
| lysophosphatidylcholine acyltransferase 3                                               | LPCAT3         | 0,94 |
| Transcript Identified by AceView, Entrez Gene ID(s) 389362                              | PSMG4          | 0,94 |
| ets variant 3-like                                                                      | ETV3L          | 0,94 |
| nuclear cap binding protein subunit 2-like                                              | NCBP2L         | 0,94 |
| protease, serine, 58                                                                    | PRSS58         | 0,94 |
| SH3-binding domain protein 5-like                                                       | SH3BP5L        | 0,94 |
| zinc finger protein 207; microRNA 632                                                   | ZNF207; MIR632 | 0,94 |
| structural maintenance of chromosomes 4                                                 | SMC4           | 0,94 |
| centromere protein M                                                                    | CENPM          | 0,94 |
| MAS-related GPR, member F                                                               | MRGPRF         | 0,94 |
| retinol dehydrogenase 16 (all-trans)                                                    | RDH16          | 0,94 |
| ARP6 actin-related protein 6 homolog (yeast)                                            | ACTR6          | 0,94 |
| NK2 homeobox 4                                                                          | NKX2-4         | 0,94 |
| Zhang2013 ALT_ACCEPTOR, ALT_DONOR, coding, INTERNAL, intronic best transcript NM_004110 | FDXR           | 0,94 |
| ARP5 actin-related protein 5 homolog (yeast)                                            | ACTR5          | 0,94 |
| DEAD (Asp-Glu-Ala-Asp) box polypeptide 23                                               | DDX23          | 0,94 |
| potassium channel, voltage gated shaker related subfamily A, member 2                   | KCNA2          | 0,94 |
| MANSC domain containing 1                                                               | MANSC1         | 0,94 |
| low density lipoprotein receptor class A domain containing 2                            | LDLRAD2        | 0,94 |
| solute carrier family 25 (mitochondrial thiamine pyrophosphate carrier), member 19      | SLC25A19       | 0,94 |
| MFNG O-fucosylpeptide 3-beta-N-acetylglucosaminyltransferase                            | MFNG           | 0,94 |
| zinc finger protein 264                                                                 | ZNF264         | 0,94 |
| gametogenetin                                                                           | GGN            | 0,94 |
| inner membrane protein, mitochondrial                                                   | IMMT           | 0,94 |
| TDP-glucose 4,6-dehydratase                                                             | TGDS           | 0,94 |

|                                                                                                                                        |                |      |
|----------------------------------------------------------------------------------------------------------------------------------------|----------------|------|
| UDP-GlcNAc:betaGal beta-1,3-N-acetylglucosaminyltransferase 4                                                                          | B3GNT4         | 0,94 |
| crumbs family member 1, photoreceptor morphogenesis associated                                                                         | CRB1           | 0,94 |
| IQ motif containing E                                                                                                                  | IQCE           | 0,94 |
| butyrophilin-like 2                                                                                                                    | BTNL2          | 0,94 |
| solute carrier family 5 (sodium/glucose cotransporter), member 1                                                                       | SLC5A1         | 0,94 |
| RAD51 associated protein 1                                                                                                             | RAD51AP1       | 0,94 |
| family with sequence similarity 150, member A                                                                                          | FAM150A        | 0,94 |
| general transcription factor IIIC subunit 6                                                                                            | GTF3C6         | 0,94 |
| Jeck2013 ALT_ACCEPTOR, ALT_DONOR, coding, INTERNAL, intronic best transcript NM_006734                                                 | HIVEP2         | 0,94 |
| Transcript Identified by AceView, Entrez Gene ID(s) 347088; adhesion G protein-coupled receptor D2 [Source:HGNC Symbol;Acc:HGNC:18651] | GPR144; ADGRD2 | 0,94 |
| melanoma inhibitory activity family, member 3                                                                                          | MIA3           | 0,94 |
| tenascin N                                                                                                                             | TNN            | 0,94 |
| OTU domain containing 6B                                                                                                               | OTUD6B         | 0,94 |
| double homeobox A                                                                                                                      | DUXA           | 0,94 |
| UDP-Gal:betaGlcNAc beta 1,4- galactosyltransferase, polypeptide 1                                                                      | B4GALT1        | 0,94 |
| leukocyte immunoglobulin-like receptor, subfamily A (with TM domain), member 1                                                         | LILRA1         | 0,94 |
| erythrocyte membrane protein band 4.2                                                                                                  | EPB42          | 0,94 |
| radial spoke head 6 homolog A (Chlamydomonas)                                                                                          | RSPH6A         | 0,94 |
| zinc finger protein 805                                                                                                                | ZNF805         | 0,94 |
| NEDD4 binding protein 3                                                                                                                | N4BP3          | 0,94 |
| interphotoreceptor matrix proteoglycan 2                                                                                               | IMPG2          | 0,94 |
| filaggrin family member 2                                                                                                              | FLG2           | 0,94 |
| spectrin, beta, erythrocytic; microRNA 7855                                                                                            | SPTB; MIR7855  | 0,94 |
| kallikrein related peptidase 11                                                                                                        | KLK11          | 0,94 |
| cytochrome c oxidase assembly factor 4 homolog                                                                                         | COA4           | 0,94 |
| ELAV like neuron-specific RNA binding protein 4                                                                                        | ELAVL4         | 0,94 |
| phenylalanyl-tRNA synthetase alpha subunit                                                                                             | FARSA          | 0,94 |
| peptidylprolyl cis/trans isomerase, NIMA-interacting 4                                                                                 | PIN4           | 0,94 |
| solute carrier family 9, subfamily C (Na <sup>+</sup> -transporting carboxylic acid decarboxylase), member 1                           | SLC9C1         | 0,94 |
| Transcript Identified by AceView, Entrez Gene ID(s) 26051                                                                              | PPP1R16B       | 0,94 |
| muskelin 1, intracellular mediator containing kelch motifs                                                                             | MKLN1          | 0,94 |
| pyroglutamylated RFamide peptide                                                                                                       | QRFP           | 0,94 |
| coiled-coil domain containing 102A                                                                                                     | CCDC102A       | 0,94 |
| kelch-like family member 23                                                                                                            | KLHL23         | 0,94 |

|                                                                                                  |                    |      |
|--------------------------------------------------------------------------------------------------|--------------------|------|
| olfactory receptor, family 8, subfamily G, member 5                                              | OR8G5              | 0,94 |
| Eukaryotic translation initiation factor 3 subunit F<br>[Source:UniProtKB/Swiss-Prot;Acc:O00303] | EIF3F              | 0,94 |
| tectonin beta-propeller repeat containing 1                                                      | TECPR1             | 0,94 |
| cilia and flagella associated protein 65                                                         | CFAP65             | 0,94 |
| CD244 molecule, natural killer cell receptor 2B4                                                 | CD244              | 0,94 |
| MACRO domain containing 2; ribosomal protein S3<br>pseudogene 1                                  | MACROD2;<br>RPS3P1 | 0,94 |
| zinc finger protein 35                                                                           | ZNF35              | 0,94 |
| STEAP family member 4                                                                            | STEAP4             | 0,94 |
| colony stimulating factor 2 receptor, alpha, low-affinity<br>(granulocyte-macrophage)            | CSF2RA             | 0,94 |
| Nipped-B homolog (Drosophila)                                                                    | NIPBL              | 0,94 |
| histamine receptor H2                                                                            | HRH2               | 0,94 |
| solute carrier family 14 (urea transporter), member 2                                            | SLC14A2            | 0,94 |
| v-akt murine thymoma viral oncogene homolog 3                                                    | AKT3               | 0,94 |
| chromosome 12 open reading frame 29                                                              | C12orf29           | 0,94 |
| mitochondrial ribosomal protein L45                                                              | MRPL45             | 0,94 |
| proapoptotic nucleolar protein 1                                                                 | PANO1              | 0,94 |
| kinesin family member 27                                                                         | KIF27              | 0,94 |
| Transcript Identified by AceView, Entrez Gene ID(s) 23378                                        | RRP8               | 0,94 |
| synaptic vesicle glycoprotein 2A                                                                 | SV2A               | 0,94 |
| serine peptidase inhibitor, Kazal type 4                                                         | SPINK4             | 0,94 |
| MAGE family member A3                                                                            | MAGEA3             | 0,94 |
| TP53 target 5                                                                                    | TP53TG5            | 0,94 |
| pellino E3 ubiquitin protein ligase family member 3                                              | PELI3              | 0,94 |
| synapse differentiation inducing 1-like                                                          | SYNDIG1L           | 0,94 |
| LMO7 downstream neighbor                                                                         | LMO7DN             | 0,94 |
| prothymosin, alpha                                                                               | PTMA               | 0,94 |
| NADH dehydrogenase (ubiquinone) complex I, assembly<br>factor 5                                  | NDUFAF5            | 0,94 |
| tetratricopeptide repeat domain 7B                                                               | TTC7B              | 0,94 |
| hydroxysteroid (17-beta) dehydrogenase 13                                                        | HSD17B13           | 0,94 |
| GPN-loop GTPase 2                                                                                | GPN2               | 0,94 |
| synaptotagmin II                                                                                 | SYT2               | 0,94 |
| protein phosphatase 1, regulatory (inhibitor) subunit 1A                                         | PPP1R1A            | 0,94 |
| leukotriene C4 synthase                                                                          | LTC4S              | 0,94 |
| gasdermin A                                                                                      | GSDMA              | 0,94 |
| mitochondrial ribosome-associated GTPase 1                                                       | MTG1               | 0,94 |
| retinoic acid early transcript 1E                                                                | RAET1E             | 0,94 |
| sorcini                                                                                          | SRI                | 0,94 |
| neuromedin U receptor 1                                                                          | NMUR1              | 0,94 |
| chimerin 2                                                                                       | CHN2               | 0,94 |
| olfactory receptor, family 13, subfamily D, member 1                                             | OR13D1             | 0,94 |

|                                                                                                                                                                                                                                                                                                                                                                                                                                                                                                                                                                                                                                                                                                                                                                                                                                                                                                                                                                                                                                                                                                                                                          |                      |      |
|----------------------------------------------------------------------------------------------------------------------------------------------------------------------------------------------------------------------------------------------------------------------------------------------------------------------------------------------------------------------------------------------------------------------------------------------------------------------------------------------------------------------------------------------------------------------------------------------------------------------------------------------------------------------------------------------------------------------------------------------------------------------------------------------------------------------------------------------------------------------------------------------------------------------------------------------------------------------------------------------------------------------------------------------------------------------------------------------------------------------------------------------------------|----------------------|------|
| chromosome 15 open reading frame 48; microRNA 147b                                                                                                                                                                                                                                                                                                                                                                                                                                                                                                                                                                                                                                                                                                                                                                                                                                                                                                                                                                                                                                                                                                       | C15orf48;<br>MIR147B | 0,94 |
| lysosomal protein transmembrane 4 beta                                                                                                                                                                                                                                                                                                                                                                                                                                                                                                                                                                                                                                                                                                                                                                                                                                                                                                                                                                                                                                                                                                                   | LAPTM4B              | 0,94 |
| transmembrane protein 110                                                                                                                                                                                                                                                                                                                                                                                                                                                                                                                                                                                                                                                                                                                                                                                                                                                                                                                                                                                                                                                                                                                                | TMEM110              | 0,94 |
| dickkopf WNT signaling pathway inhibitor 4                                                                                                                                                                                                                                                                                                                                                                                                                                                                                                                                                                                                                                                                                                                                                                                                                                                                                                                                                                                                                                                                                                               | DKK4                 | 0,94 |
| adducin 3 (gamma)                                                                                                                                                                                                                                                                                                                                                                                                                                                                                                                                                                                                                                                                                                                                                                                                                                                                                                                                                                                                                                                                                                                                        | ADD3                 | 0,94 |
| goosecoid homeobox                                                                                                                                                                                                                                                                                                                                                                                                                                                                                                                                                                                                                                                                                                                                                                                                                                                                                                                                                                                                                                                                                                                                       | GSC                  | 0,94 |
| neurobeachin like 1                                                                                                                                                                                                                                                                                                                                                                                                                                                                                                                                                                                                                                                                                                                                                                                                                                                                                                                                                                                                                                                                                                                                      | NBEAL1               | 0,94 |
| cannabinoid receptor 2                                                                                                                                                                                                                                                                                                                                                                                                                                                                                                                                                                                                                                                                                                                                                                                                                                                                                                                                                                                                                                                                                                                                   | CNR2                 | 0,94 |
| Transcript Identified by AceView, Entrez Gene ID(s) 8425                                                                                                                                                                                                                                                                                                                                                                                                                                                                                                                                                                                                                                                                                                                                                                                                                                                                                                                                                                                                                                                                                                 | LTBP4                | 0,94 |
| signal transducing adaptor family member 1                                                                                                                                                                                                                                                                                                                                                                                                                                                                                                                                                                                                                                                                                                                                                                                                                                                                                                                                                                                                                                                                                                               | STAP1                | 0,94 |
| chromosome 10 open reading frame 131                                                                                                                                                                                                                                                                                                                                                                                                                                                                                                                                                                                                                                                                                                                                                                                                                                                                                                                                                                                                                                                                                                                     | C10orf131            | 0,94 |
| neurexophilin and PC-esterase domain family, member 1                                                                                                                                                                                                                                                                                                                                                                                                                                                                                                                                                                                                                                                                                                                                                                                                                                                                                                                                                                                                                                                                                                    | NXPE1                | 0,94 |
| Homo sapiens XK, Kell blood group complex subunit-related, Y-linked 2 (XKRY2), mRNA.; Homo sapiens XK, Kell blood group complex subunit-related, Y-linked (XKRY), mRNA.; Homo sapiens XK, Kell blood group complex subunit-related, Y-linked, mRNA (cDNA clone MGC:164514 IMAGE:40146905), complete cds.; Homo sapiens XK, Kell blood group complex subunit-related, Y-linked, mRNA (cDNA clone MGC:164516 IMAGE:40146907), complete cds.; Homo sapiens XK, Kell blood group complex subunit-related, Y-linked 2, mRNA (cDNA clone MGC:164532 IMAGE:40146923), complete cds.; Homo sapiens XK, Kell blood group complex subunit-related, Y-linked 2, mRNA (cDNA clone MGC:164534 IMAGE:40146925), complete cds.; Synthetic construct Homo sapiens clone IMAGE:100015836, MGC:183189 XK, Kell blood group complex subunit-related, Y-linked 2 (XKRY2) mRNA, encodes complete protein.; Synthetic construct Homo sapiens clone IMAGE:100016528, MGC:184271 XK, Kell blood group complex subunit-related, Y-linked (XKRY) mRNA, encodes complete protein.; Transcript Identified by AceView, Entrez Gene ID(s) 353515, RefSeq ID(s) NM_004677, NM_001002906 | XKRY2; XKRY          | 0,94 |
| ovo-like zinc finger 3                                                                                                                                                                                                                                                                                                                                                                                                                                                                                                                                                                                                                                                                                                                                                                                                                                                                                                                                                                                                                                                                                                                                   | OVOL3                | 0,94 |
| Transcript Identified by AceView, Entrez Gene ID(s) 375775                                                                                                                                                                                                                                                                                                                                                                                                                                                                                                                                                                                                                                                                                                                                                                                                                                                                                                                                                                                                                                                                                               | PNPLA7               | 0,94 |
| NRDE-2, necessary for RNA interference, domain containing                                                                                                                                                                                                                                                                                                                                                                                                                                                                                                                                                                                                                                                                                                                                                                                                                                                                                                                                                                                                                                                                                                | NRDE2                | 0,94 |
| keratin 33A, type I                                                                                                                                                                                                                                                                                                                                                                                                                                                                                                                                                                                                                                                                                                                                                                                                                                                                                                                                                                                                                                                                                                                                      | KRT33A               | 0,94 |
| myelodysplastic syndrome 2 translocation associated                                                                                                                                                                                                                                                                                                                                                                                                                                                                                                                                                                                                                                                                                                                                                                                                                                                                                                                                                                                                                                                                                                      | MDS2                 | 0,94 |



|                                                                                                                                                                                                                                                                                                                                                                                                                          |                                                                                                                                                                           |      |
|--------------------------------------------------------------------------------------------------------------------------------------------------------------------------------------------------------------------------------------------------------------------------------------------------------------------------------------------------------------------------------------------------------------------------|---------------------------------------------------------------------------------------------------------------------------------------------------------------------------|------|
| leucine-rich repeat, immunoglobulin-like and transmembrane domains 1                                                                                                                                                                                                                                                                                                                                                     | LRIT1                                                                                                                                                                     | 0,94 |
| peptidyl arginine deiminase, type VI                                                                                                                                                                                                                                                                                                                                                                                     | PADI6                                                                                                                                                                     | 0,94 |
| zinc finger protein 735                                                                                                                                                                                                                                                                                                                                                                                                  | ZNF735                                                                                                                                                                    | 0,94 |
| Zhang2013 ALT_ACCEPTOR, ALT_DONOR, coding, INTERNAL, intronic best transcript NM_020338                                                                                                                                                                                                                                                                                                                                  | ZMIZ1                                                                                                                                                                     | 0,94 |
| G-patch domain and KOW motifs                                                                                                                                                                                                                                                                                                                                                                                            | GPKOW                                                                                                                                                                     | 0,94 |
| keratocan                                                                                                                                                                                                                                                                                                                                                                                                                | KERA                                                                                                                                                                      | 0,94 |
| mitochondrial ribosomal protein L47                                                                                                                                                                                                                                                                                                                                                                                      | MRPL47                                                                                                                                                                    | 0,94 |
| IQ motif containing F5 pseudogene; Transcript Identified by AceView, Entrez Gene ID(s) 401067                                                                                                                                                                                                                                                                                                                            | IQCF4; IQCF3                                                                                                                                                              | 0,94 |
| mucin 7, secreted                                                                                                                                                                                                                                                                                                                                                                                                        | MUC7                                                                                                                                                                      | 0,94 |
| pleckstrin homology domain containing, family A (phosphoinositide binding specific) member 4                                                                                                                                                                                                                                                                                                                             | PLEKHA4                                                                                                                                                                   | 0,94 |
| potassium voltage-gated channel, modifier subfamily S, member 2                                                                                                                                                                                                                                                                                                                                                          | KCNS2                                                                                                                                                                     | 0,94 |
| spectrin, alpha, erythrocytic 1                                                                                                                                                                                                                                                                                                                                                                                          | SPTA1                                                                                                                                                                     | 0,94 |
| protein phosphatase 2, regulatory subunit B, gamma                                                                                                                                                                                                                                                                                                                                                                       | PPP2R5C                                                                                                                                                                   | 0,94 |
| neurogenin 3                                                                                                                                                                                                                                                                                                                                                                                                             | NEUROG3                                                                                                                                                                   | 0,94 |
| RNA binding region (RNP1, RRM) containing 3                                                                                                                                                                                                                                                                                                                                                                              | RNPC3                                                                                                                                                                     | 0,94 |
| cholinergic receptor, nicotinic alpha 4                                                                                                                                                                                                                                                                                                                                                                                  | CHRNA4                                                                                                                                                                    | 0,94 |
| testis expressed 22                                                                                                                                                                                                                                                                                                                                                                                                      | TEX22                                                                                                                                                                     | 0,94 |
| ring finger protein 180                                                                                                                                                                                                                                                                                                                                                                                                  | RNF180                                                                                                                                                                    | 0,94 |
| Memczak2013 ANTISENSE, CDS, coding, INTERNAL best transcript NM_012335                                                                                                                                                                                                                                                                                                                                                   | MYO1F                                                                                                                                                                     | 0,94 |
| protocadherin alpha 9; protocadherin alpha subfamily C, 1; protocadherin alpha subfamily C, 2; protocadherin alpha 1; protocadherin alpha 10; protocadherin alpha 11; protocadherin alpha 12; protocadherin alpha 13; protocadherin alpha 2; protocadherin alpha 3; protocadherin alpha 4; protocadherin alpha 5; protocadherin alpha 6; protocadherin alpha 7; protocadherin alpha 8; protocadherin alpha 14 pseudogene | PCDHA9;<br>PCDHAC1;<br>PCDHAC2;<br>PCDHA1;<br>PCDHA10;<br>PCDHA11;<br>PCDHA12;<br>PCDHA13;<br>PCDHA2; PCDHA3;<br>PCDHA4; PCDHA5;<br>PCDHA6; PCDHA7;<br>PCDHA8;<br>PCDHA14 | 0,94 |
| lactate dehydrogenase A-like 6B                                                                                                                                                                                                                                                                                                                                                                                          | LDHAL6B                                                                                                                                                                   | 0,94 |
| chromosome 6 open reading frame 223                                                                                                                                                                                                                                                                                                                                                                                      | C6orf223                                                                                                                                                                  | 0,94 |
| mixed lineage kinase 4; Mitogen-activated protein kinase kinase kinase MLK4 [Source:UniProtKB/Swiss-Prot;Acc:Q5TCX8]; Salzman2013 ANNOTATED, CDS, coding, INTERNAL, OVCODE, OVEXON best transcript NM_032435                                                                                                                                                                                                             | KIAA1804; MLK4                                                                                                                                                            | 0,94 |

|                                                                                                                                    |                        |      |
|------------------------------------------------------------------------------------------------------------------------------------|------------------------|------|
| abhydrolase domain containing 12B                                                                                                  | ABHD12B                | 0,94 |
| chromosome 16 open reading frame 82                                                                                                | C16orf82               | 0,94 |
| myozenin 1                                                                                                                         | MYOZ1                  | 0,94 |
| interferon-induced protein 44-like                                                                                                 | IFI44L                 | 0,94 |
| endogenous retrovirus group MER34, member 1                                                                                        | ERVMER34-1             | 0,94 |
| KIAA1456                                                                                                                           | KIAA1456               | 0,94 |
| phosphatidylinositol 4-kinase type 2 beta                                                                                          | PI4K2B                 | 0,94 |
| kelch-like family member 15                                                                                                        | KLHL15                 | 0,94 |
| nuclear receptor interacting protein 3                                                                                             | NRIP3                  | 0,94 |
| proteinase 3                                                                                                                       | PRTN3                  | 0,94 |
| family with sequence similarity 126, member A                                                                                      | FAM126A                | 0,94 |
| uncharacterized LOC286238; Transcript Identified by AceView, Entrez Gene ID(s) 286238, RefSeq ID(s) NM_001100111; novel transcript | LOC286238; RP13-60M5.2 | 0,94 |
| FRAS1 related extracellular matrix protein 2                                                                                       | FREM2                  | 0,94 |
| double homeobox 3                                                                                                                  | DUX3                   | 0,94 |
| chromosome 14 open reading frame 159                                                                                               | C14orf159              | 0,94 |
| glycoprotein M6A                                                                                                                   | GPM6A                  | 0,94 |
| NLR family, pyrin domain containing 4                                                                                              | NLRP4                  | 0,94 |
| zinc finger protein 483                                                                                                            | ZNF483                 | 0,94 |
| claudin 25                                                                                                                         | CLDN25                 | 0,94 |
| G protein-coupled receptor 21; RAB GTPase activating protein 1                                                                     | GPR21; RABGAP1         | 0,94 |
| transmembrane protein 78                                                                                                           | TMEM78                 | 0,94 |
| androglobin                                                                                                                        | ADGB                   | 0,94 |
| zinc finger protein 780A                                                                                                           | ZNF780A                | 0,94 |
| ring finger protein 207                                                                                                            | RNF207                 | 0,94 |
| olfactory receptor, family 1, subfamily P, member 1 (gene/pseudogene)                                                              | OR1P1                  | 0,94 |
| Spi-C transcription factor (Spi-1/PU.1 related)                                                                                    | SPIC                   | 0,94 |
| transmembrane protein with EGF-like and two follistatin-like domains 2                                                             | TMEFF2                 | 0,94 |
| LIM homeobox 8                                                                                                                     | LHX8                   | 0,94 |
| SECIS binding protein 2                                                                                                            | SECISBP2               | 0,94 |
| chromosome 21 open reading frame 58                                                                                                | C21orf58               | 0,94 |
| zinc finger protein 784                                                                                                            | ZNF784                 | 0,94 |
| GAR1 homolog, ribonucleoprotein                                                                                                    | GAR1                   | 0,94 |
| copine VII                                                                                                                         | CPNE7                  | 0,94 |
| Jeck2013 ALT_ACCEPTOR, ALT_DONOR, coding, INTERNAL, intronic best transcript NM_058175                                             | COL6A2                 | 0,94 |
| solute carrier family 12 (sodium/potassium/chloride transporter), member 1                                                         | SLC12A1                | 0,94 |
| keratin associated protein 6-2                                                                                                     | KRTAP6-2               | 0,94 |
| alpha hemoglobin stabilizing protein                                                                                               | AHSP                   | 0,94 |
| F-box protein 24                                                                                                                   | FBXO24                 | 0,94 |

|                                                                                         |                          |      |
|-----------------------------------------------------------------------------------------|--------------------------|------|
| uncharacterized LOC401357; novel piRNA host transcript                                  | LOC401357; RP13-580B18.4 | 0,94 |
| l(3)mbt-like 2 (Drosophila)                                                             | L3MBTL2                  | 0,94 |
| G protein-coupled receptor 34                                                           | GPR34                    | 0,94 |
| zinc finger protein 536                                                                 | ZNF536                   | 0,94 |
| NADH dehydrogenase (ubiquinone) flavoprotein 1, 51kDa                                   | NDUFV1                   | 0,94 |
| colony stimulating factor 2 receptor, alpha, low-affinity (granulocyte-macrophage)      | CSF2RA                   | 0,94 |
| sema domain, immunoglobulin domain (Ig), short basic domain, secreted, (semaphorin) 3G  | SEMA3G                   | 0,94 |
| zinc finger protein 676                                                                 | ZNF676                   | 0,94 |
| novel transcript; Transcript Identified by AceView, Entrez Gene ID(s) 7099              | RP11-281A20.2; TLR4      | 0,94 |
| regulator of G-protein signaling 13                                                     | RGS13                    | 0,94 |
| cell division cycle associated 7-like                                                   | CDCA7L                   | 0,94 |
| torsin A interacting protein 2                                                          | TOR1AIP2                 | 0,94 |
| regulatory factor X, 4 (influences HLA class II expression)                             | RFX4                     | 0,94 |
| microfibrillar associated protein 1                                                     | MFAP1                    | 0,94 |
| interleukin 17 receptor A                                                               | IL17RA                   | 0,94 |
| interferon (alpha, beta and omega) receptor 1                                           | IFNAR1                   | 0,94 |
| trichoplein, keratin filament binding                                                   | TCHP                     | 0,94 |
| complement factor H-related 2                                                           | CFHR2                    | 0,94 |
| cleavage and polyadenylation specific factor 3                                          | CPSF3                    | 0,94 |
| Transcript Identified by AceView, Entrez Gene ID(s) 84193                               | SETD3                    | 0,94 |
| chromosome 12 open reading frame 77                                                     | C12orf77                 | 0,94 |
| otopetrin 1                                                                             | OTOP1                    | 0,94 |
| PRAME family member 25                                                                  | PRAMEF25                 | 0,94 |
| methionine sulfoxide reductase A                                                        | MSRA                     | 0,94 |
| actin-like 10                                                                           | ACTL10                   | 0,94 |
| Transcript Identified by AceView, Entrez Gene ID(s) 51755                               | CDK12                    | 0,94 |
| heterogeneous nuclear ribonucleoprotein A1-like 2                                       | HNRNPA1L2                | 0,94 |
| ring finger protein 20, E3 ubiquitin protein ligase                                     | RNF20                    | 0,94 |
| myosin light chain 7                                                                    | MYL7                     | 0,94 |
| schlafen family member 14                                                               | SLFN14                   | 0,94 |
| NOP9 nucleolar protein                                                                  | NOP9                     | 0,94 |
| ankyrin repeat domain 30B-like                                                          | ANKRD30BL                | 0,94 |
| translocase of outer mitochondrial membrane 20 homolog (yeast)-like                     | TOMM20L                  | 0,94 |
| speedy/RINGO cell cycle regulator family member E16 [Source:HGNC Symbol;Acc:HGNC:51512] | SPDYE16                  | 0,94 |
| mesenchyme homeobox 2                                                                   | MEOX2                    | 0,94 |

|                                                                                            |                      |      |
|--------------------------------------------------------------------------------------------|----------------------|------|
| defensin, beta 112                                                                         | DEFB112              | 0,94 |
| C-type lectin domain family 17, member A                                                   | CLEC17A              | 0,94 |
| metaxin 1                                                                                  | MTX1                 | 0,94 |
| EF-hand calcium binding domain 3                                                           | EFCAB3               | 0,94 |
| estrogen-related receptor beta                                                             | ESRRB                | 0,94 |
| BPI fold containing family A, member 3                                                     | BPIFA3               | 0,94 |
| chromosome 2 open reading frame 48                                                         | C2orf48              | 0,94 |
| Transcript Identified by AceView, Entrez Gene ID(s) 1791                                   | DNTT                 | 0,94 |
| Transcript Identified by AceView, Entrez Gene ID(s) 79922; novel transcript                | CTB-75G16.3;<br>MRM1 | 0,94 |
| zinc finger protein 225                                                                    | ZNF225               | 0,94 |
| RAD21 antisense RNA 1                                                                      | RAD21-AS1            | 0,94 |
| myosin light chain kinase 2                                                                | MYLK2                | 0,94 |
| phosphoribosyl pyrophosphate synthetase 2                                                  | PRPS2                | 0,94 |
| propionyl-CoA carboxylase alpha subunit                                                    | PCCA                 | 0,94 |
| zinc finger protein 883                                                                    | ZNF883               | 0,94 |
| immunoglobulin superfamily, member 11                                                      | IGSF11               | 0,94 |
| Transcript Identified by AceView, Entrez Gene ID(s) 3082                                   | HGF                  | 0,94 |
| peroxiredoxin 6                                                                            | PRDX6                | 0,94 |
| zinc finger protein 8                                                                      | ZNF8                 | 0,94 |
| cytochrome P450, family 27, subfamily B, polypeptide 1                                     | CYP27B1              | 0,94 |
| 2-oxoglutarate and iron-dependent oxygenase domain containing 2                            | OGFOD2               | 0,94 |
| BARX homeobox 1                                                                            | BARX1                | 0,94 |
| transmembrane protein 72                                                                   | TMEM72               | 0,94 |
| cyclin-dependent kinase 16                                                                 | CDK16                | 0,94 |
| ubiquitin specific peptidase 48                                                            | USP48                | 0,94 |
| interferon, alpha 1                                                                        | IFNA1                | 0,94 |
| KIAA2026                                                                                   | KIAA2026             | 0,94 |
| chromosome 2 open reading frame 54                                                         | C2orf54              | 0,94 |
| defensin, beta 121                                                                         | DEFB121              | 0,94 |
| NADH dehydrogenase (ubiquinone) 1 alpha subcomplex, 10, 42kDa                              | NDUFA10              | 0,94 |
| nidogen 2 (osteonidogen)                                                                   | NID2                 | 0,94 |
| citrate synthase                                                                           | CS                   | 0,94 |
| interferon, lambda 3                                                                       | IFNL3                | 0,94 |
| delta-like 2 homolog (Drosophila)                                                          | DLK2                 | 0,94 |
| apoptotic peptidase activating factor 1                                                    | APAF1                | 0,94 |
| FERM domain containing 7                                                                   | FRMD7                | 0,94 |
| Zhang2013 ALT_ACCEPTOR, ALT_DONOR, coding, INTERNAL, intronic best transcript NM_001006641 | SLC25A25             | 0,94 |
| pleckstrin homology domain containing, family G (with RhoGef domain) member 7              | PLEKHG7              | 0,94 |

|                                                                                                                      |                    |      |
|----------------------------------------------------------------------------------------------------------------------|--------------------|------|
| tumor necrosis factor (ligand) superfamily, member 8                                                                 | TNFSF8             | 0,94 |
| spectrin repeat containing, nuclear envelope 2                                                                       | SYNE2              | 0,94 |
| eukaryotic translation initiation factor 3, subunit C;<br>eukaryotic translation initiation factor 3, subunit C-like | EIF3C; EIF3CL      | 0,94 |
| long intergenic non-protein coding RNA 266-1                                                                         | LINC00266-1        | 0,94 |
| FtsJ homolog 3 (E. coli)                                                                                             | FTSJ3              | 0,94 |
| EEF1E1-BLOC1S5 readthrough (NMD candidate)                                                                           | EEF1E1-BLOC1S5     | 0,94 |
| carboxypeptidase O                                                                                                   | CPO                | 0,94 |
| myosin, heavy chain 4, skeletal muscle                                                                               | MYH4               | 0,94 |
| hydroxyprostaglandin dehydrogenase 15-(NAD)                                                                          | HPGD               | 0,94 |
| dual serine/threonine and tyrosine protein kinase                                                                    | DSTYK              | 0,94 |
| transmembrane protein 89                                                                                             | TMEM89             | 0,94 |
| TRK-fused gene                                                                                                       | TFG                | 0,94 |
| actinin, alpha 3 (gene/pseudogene)                                                                                   | ACTN3              | 0,94 |
| Memczak2013 ANTISENSE, CDS, coding, INTERNAL best<br>transcript NM_156039                                            | CSF3R              | 0,94 |
| chromosome 19 open reading frame 68                                                                                  | C19orf68           | 0,94 |
| olfactory receptor, family 8, subfamily U, member 1;<br>olfactory receptor, family 8, subfamily U, member 8          | OR8U1; OR8U8       | 0,94 |
| NIPA-like domain containing 4                                                                                        | NIPAL4             | 0,94 |
| CAP-GLY domain containing linker protein 2                                                                           | CLIP2              | 0,94 |
| zinc finger CCCH-type domain-containing-like                                                                         | LOC441155          | 0,94 |
| stromal cell-derived factor 2-like 1                                                                                 | SDF2L1             | 0,94 |
| diphthamine biosynthesis 6                                                                                           | DPH6               | 0,94 |
| MAGE family member A9B; MAGE family member A9                                                                        | MAGEA9B;<br>MAGEA9 | 0,94 |
| SEN3-EIF4A1 readthrough (NMD candidate)                                                                              | SEN3-EIF4A1        | 0,94 |
| SH2 domain containing 7                                                                                              | SH2D7              | 0,94 |
| ATPase, Na+/K+ transporting, alpha 1 polypeptide                                                                     | ATP1A1             | 0,94 |
| beta-carotene oxygenase 1                                                                                            | BCO1               | 0,94 |
| prefoldin subunit 5                                                                                                  | PFDN5              | 0,94 |
| phospholipase C-like 1                                                                                               | PLCL1              | 0,94 |
| Fc fragment of IgG, low affinity IIIb, receptor (CD16b)                                                              | FCGR3B             | 0,94 |
| GDNF family receptor alpha 4                                                                                         | GFRA4              | 0,94 |
| heparanase 2 (inactive)                                                                                              | HPSE2              | 0,94 |
| hypoxia up-regulated 1                                                                                               | HYOU1              | 0,94 |
| vascular endothelial growth factor C                                                                                 | VEGFC              | 0,94 |
| wingless-type MMTV integration site family, member 4                                                                 | WNT4               | 0,94 |
| cytokine receptor-like factor 3                                                                                      | CRLF3              | 0,94 |
| BRCA2 and CDKN1A interacting protein                                                                                 | BCCIP              | 0,94 |
| chemokine (C-C motif) ligand 19                                                                                      | CCL19              | 0,94 |
| Transcript Identified by AceView, Entrez Gene ID(s) 91445                                                            | RNF185             | 0,94 |
| chromosome 2 open reading frame 49                                                                                   | C2orf49            | 0,93 |
| dachshund family transcription factor 2                                                                              | DACH2              | 0,93 |

|                                                                                                                             |                           |      |
|-----------------------------------------------------------------------------------------------------------------------------|---------------------------|------|
| PCOLCE antisense RNA 1                                                                                                      | PCOLCE-AS1                | 0,93 |
| oncomodulin 2                                                                                                               | OCM2                      | 0,93 |
| dedicator of cytokinesis 10                                                                                                 | DOCK10                    | 0,93 |
| zinc finger, FYVE domain containing 28                                                                                      | ZFYVE28                   | 0,93 |
| inhibitor of Bruton agammaglobulinemia tyrosine kinase                                                                      | IBTK                      | 0,93 |
| zinc finger protein 574                                                                                                     | ZNF574                    | 0,93 |
| FXYP domain containing ion transport regulator 6; FXYP6-FXYP2 readthrough; FXYP domain containing ion transport regulator 2 | FXYP6; FXYP6-FXYP2; FXYP2 | 0,93 |
| tRNA methyltransferase 10C, mitochondrial RNase P subunit                                                                   | TRMT10C                   | 0,93 |
| olfactory receptor, family 2, subfamily Z, member 1                                                                         | OR2Z1                     | 0,93 |
| calcium channel, voltage-dependent, N type, alpha 1B subunit                                                                | CACNA1B                   | 0,93 |
| Salzman2013 ANTISENSE, CDS, coding, INTERNAL, intronic, OVCODE, OVERLAPTX, OVEXON best transcript NM_001014809              | CRMP1                     | 0,93 |
| thrombopoietin                                                                                                              | THPO                      | 0,93 |
| Sys1 golgi trafficking protein                                                                                              | SYS1                      | 0,93 |
| phospholipase C, eta 1                                                                                                      | PLCH1                     | 0,93 |
| Rho GTPase activating protein 36                                                                                            | ARHGAP36                  | 0,93 |
| microtubule-associated protein 10                                                                                           | MAP10                     | 0,93 |
| Memczak2013 ALT_ACCEPTOR, ALT_DONOR, coding, INTERNAL, intronic best transcript NM_152701                                   | ABCA13                    | 0,93 |
| carcinoembryonic antigen-related cell adhesion molecule 4                                                                   | CEACAM4                   | 0,93 |
| zinc finger protein 654                                                                                                     | ZNF654                    | 0,93 |
| SH2 domain containing 1A                                                                                                    | SH2D1A                    | 0,93 |
| chromosome 7 open reading frame 61                                                                                          | C7orf61                   | 0,93 |
| neuropeptide FF receptor 1                                                                                                  | NPFFR1                    | 0,93 |
| Transcript Identified by AceView, Entrez Gene ID(s) 56895                                                                   | AGPAT4                    | 0,93 |
| Jeck2013 ALT_ACCEPTOR, ALT_DONOR, coding, INTERNAL, intronic best transcript NM_001080396                                   | FAM155A                   | 0,93 |
| Transcript Identified by AceView, Entrez Gene ID(s) 1488                                                                    | CTBP2                     | 0,93 |
| Memczak2013 ALT_ACCEPTOR, ALT_DONOR, coding, INTERNAL, intronic best transcript NM_015032                                   | PDS5B                     | 0,93 |
| olfactory receptor, family 10, subfamily R, member 2                                                                        | OR10R2                    | 0,93 |
| protein kinase, AMP-activated, alpha 1 catalytic subunit                                                                    | PRKAA1                    | 0,93 |
| fibroblast growth factor 3                                                                                                  | FGF3                      | 0,93 |
| malate dehydrogenase 1B                                                                                                     | MDH1B                     | 0,93 |
| RAS p21 protein activator (GTPase activating protein) 1                                                                     | RASA1                     | 0,93 |
| pseudopodium-enriched atypical kinase 1                                                                                     | PEAK1                     | 0,93 |

|                                                                                           |                                     |      |
|-------------------------------------------------------------------------------------------|-------------------------------------|------|
| transforming growth factor alpha                                                          | TGFA                                | 0,93 |
| zinc finger protein 99                                                                    | ZNF99                               | 0,93 |
| SERTA domain containing 4                                                                 | SERTAD4                             | 0,93 |
| adenylate cyclase 8 (brain)                                                               | ADCY8                               | 0,93 |
| transcription elongation factor A (SII)-like 6                                            | TCEAL6                              | 0,93 |
| phospholipid phosphatase related 3                                                        | PLPPR3                              | 0,93 |
| SET domain containing 1A                                                                  | SETD1A                              | 0,93 |
| Memczak2013 ALT_ACCEPTOR, ALT_DONOR, coding, INTERNAL, intronic best transcript NM_052847 | GNG7                                | 0,93 |
| solute carrier family 28 (concentrative nucleoside transporter), member 1                 | SLC28A1                             | 0,93 |
| killer cell lectin-like receptor subfamily G, member 1                                    | KLRG1                               | 0,93 |
| N-terminal EF-hand calcium binding protein 2                                              | NECAB2                              | 0,93 |
| uncharacterized LOC339862; novel transcript; Transcript Identified by AceView             | LOC339862; RP11-320G10.1; skerdorbo | 0,93 |
| intracisternal A particle-promoted polypeptide                                            | IPP                                 | 0,93 |
| P antigen family, member 3 (prostate associated)                                          | PAGE3                               | 0,93 |
| transmembrane protein 132E                                                                | TMEM132E                            | 0,93 |
| guanine nucleotide binding protein (G protein), gamma 8                                   | GNG8                                | 0,93 |
| coiled-coil domain containing 60                                                          | CCDC60                              | 0,93 |
| interferon, lambda 1                                                                      | IFNL1                               | 0,93 |
| chromosome 17 open reading frame 50                                                       | C17orf50                            | 0,93 |
| heparanase                                                                                | HPSE                                | 0,93 |
| cellular retinoic acid binding protein 1                                                  | CRABP1                              | 0,93 |
| URI1, prefoldin-like chaperone                                                            | URI1                                | 0,93 |
| Memczak2013 ANTISENSE, CDS, coding, INTERNAL best transcript NM_005120                    | MED12                               | 0,93 |
| PDZ domain containing ring finger 3                                                       | PDZRN3                              | 0,93 |
| plakophilin 1                                                                             | PKP1                                | 0,93 |
| solute carrier family 9, subfamily A (NHE5, cation proton antiporter 5), member 5         | SLC9A5                              | 0,93 |
| Transcript Identified by AceView, Entrez Gene ID(s) 8896                                  | BUD31                               | 0,93 |
| chemokine (C-X-C motif) ligand 12                                                         | CXCL12                              | 0,93 |
| plasmalemma vesicle associated protein                                                    | PLVAP                               | 0,93 |
| guanine nucleotide binding protein (G protein), beta 5                                    | GNB5                                | 0,93 |
| bone morphogenetic protein/retinoic acid inducible neural-specific 2                      | BRINP2                              | 0,93 |
| somatostatin receptor 1                                                                   | SSTR1                               | 0,93 |
| schlafen family member 11                                                                 | SLFN11                              | 0,93 |
| protein kinase D1                                                                         | PRKD1                               | 0,93 |
| kinesin light chain 3                                                                     | KLC3                                | 0,93 |
| testis expressed 11                                                                       | TEX11                               | 0,93 |

|                                                                                                                                                                                                                                                                                                                                               |                                        |      |
|-----------------------------------------------------------------------------------------------------------------------------------------------------------------------------------------------------------------------------------------------------------------------------------------------------------------------------------------------|----------------------------------------|------|
| limb development membrane protein 1                                                                                                                                                                                                                                                                                                           | LMBR1                                  | 0,93 |
| histocompatibility (minor) HB-1                                                                                                                                                                                                                                                                                                               | HMHB1                                  | 0,93 |
| DEP domain containing 5                                                                                                                                                                                                                                                                                                                       | DEPDC5                                 | 0,93 |
| membrane-spanning 4-domains, subfamily A, member 6E                                                                                                                                                                                                                                                                                           | MS4A6E                                 | 0,93 |
| Memczak2013 ALT_ACCEPTOR, ALT_DONOR, coding, INTERNAL, intronic best transcript NM_021141                                                                                                                                                                                                                                                     | XRCC5                                  | 0,93 |
| ring finger protein 17                                                                                                                                                                                                                                                                                                                        | RNF17                                  | 0,93 |
| poly(A) binding protein, cytoplasmic 1-like 2A                                                                                                                                                                                                                                                                                                | PABPC1L2A                              | 0,93 |
| eukaryotic translation initiation factor 3, subunit A                                                                                                                                                                                                                                                                                         | EIF3A                                  | 0,93 |
| coiled-coil and C2 domain containing 1A                                                                                                                                                                                                                                                                                                       | CC2D1A                                 | 0,93 |
| nucleoporin 43kDa                                                                                                                                                                                                                                                                                                                             | NUP43                                  | 0,93 |
| NADH dehydrogenase (ubiquinone) Fe-S protein 8, 23kDa (NADH-coenzyme Q reductase); microRNA 4691; microRNA 7113                                                                                                                                                                                                                               | NDUFS8;<br>MIR4691;<br>MIR7113         | 0,93 |
| tumor suppressing subtransferable candidate 4                                                                                                                                                                                                                                                                                                 | TSSC4                                  | 0,93 |
| transmembrane protein 41B                                                                                                                                                                                                                                                                                                                     | TMEM41B                                | 0,93 |
| kinesin family member 12                                                                                                                                                                                                                                                                                                                      | KIF12                                  | 0,93 |
| presenilin 2                                                                                                                                                                                                                                                                                                                                  | PSEN2                                  | 0,93 |
| leucine rich repeat and fibronectin type III domain containing 3                                                                                                                                                                                                                                                                              | LRFN3                                  | 0,93 |
| one cut homeobox 2                                                                                                                                                                                                                                                                                                                            | ONECUT2                                | 0,93 |
| CXXC finger protein 4                                                                                                                                                                                                                                                                                                                         | CXXC4                                  | 0,93 |
| gastrokine 2                                                                                                                                                                                                                                                                                                                                  | GKN2                                   | 0,93 |
| opticin                                                                                                                                                                                                                                                                                                                                       | OPTC                                   | 0,93 |
| Memczak2013 ANTISENSE, CDS, coding, INTERNAL best transcript NM_017519                                                                                                                                                                                                                                                                        | ARID1B                                 | 0,93 |
| Homo sapiens chromosome X open reading frame 51A (CXorf51A), mRNA.; Homo sapiens chromosome X open reading frame 51B (CXorf51B), mRNA.; Transcript Identified by AceView, Entrez Gene ID(s) 100129239, RefSeq ID(s) NM_001144064; chromosome X open reading frame 51A [Source:HGNC Symbol;Acc:HGNC:30533]; chromosome X open reading frame 51 | CXorf51A;<br>CXorf51B; CXorf51         | 0,93 |
| RUN and FYVE domain containing 2                                                                                                                                                                                                                                                                                                              | RUFY2                                  | 0,93 |
| defensin, beta 105B; defensin, beta 105A                                                                                                                                                                                                                                                                                                      | DEFB105B;<br>DEFB105A                  | 0,93 |
| B melanoma antigen; B melanoma antigen family, member 4; B melanoma antigen family, member 3; B melanoma antigen family, member 2; B melanoma antigen family, member 5                                                                                                                                                                        | BAGE; BAGE4;<br>BAGE3; BAGE2;<br>BAGE5 | 0,93 |
| kelch-like family member 38                                                                                                                                                                                                                                                                                                                   | KLHL38                                 | 0,93 |
| hypoxia up-regulated 1                                                                                                                                                                                                                                                                                                                        | HYOU1                                  | 0,93 |
| olfactory receptor, family 1, subfamily B, member 1 (gene/pseudogene)                                                                                                                                                                                                                                                                         | OR1B1                                  | 0,93 |



|                                                                                       |                     |      |
|---------------------------------------------------------------------------------------|---------------------|------|
| ATP synthase, H <sup>+</sup> transporting, mitochondrial F1 complex, beta polypeptide | ATP5B               | 0,93 |
|                                                                                       | LRIG1               | 0,93 |
| FCH domain only 2                                                                     | FCHO2               | 0,93 |
| adenosine deaminase, RNA-specific, B2 (inactive)                                      | ADARB2              | 0,93 |
| vomerolnasal 1 receptor 5 (gene/pseudogene)                                           | VN1R5               | 0,93 |
| phospholipase C, gamma 1; ribosomal protein L23a pseudogene 81                        | PLCG1;<br>RPL23AP81 | 0,93 |
| glycosyltransferase 6 domain containing 1                                             | GLT6D1              | 0,93 |
| kinetochore-localized astrin/SPAG5 binding protein                                    | KNSTRN              | 0,93 |
| immunoglobulin-like domain containing receptor 2                                      | ILDR2               | 0,93 |
| ubiquitin specific peptidase 51                                                       | USP51               | 0,93 |
| speedy/RINGO cell cycle regulator family member E1                                    | SPDYE1              | 0,93 |
| 5-hydroxytryptamine (serotonin) receptor 1A, G protein-coupled                        | HTR1A               | 0,93 |
| sperm mitochondria-associated cysteine-rich protein                                   | SMCP                | 0,93 |
| olfactory receptor, family 1, subfamily J, member 4                                   | OR1J4               | 0,93 |
| zinc finger protein 648                                                               | ZNF648              | 0,93 |
| solute carrier family 25, member 46                                                   | SLC25A46            | 0,93 |
| RGD motif, leucine rich repeats, tropomodulin domain and proline-rich containing      | RLTPR               | 0,93 |
| guanylate binding protein 7                                                           | GBP7                | 0,93 |
| CKLF-like MARVEL transmembrane domain containing 1                                    | CMTM1               | 0,93 |
| zinc finger protein 546                                                               | ZNF546              | 0,93 |
| sushi domain containing 4                                                             | SUSD4               | 0,93 |
| tonsoku-like, DNA repair protein                                                      | TONSL               | 0,93 |
| SET domain containing 6                                                               | SETD6               | 0,93 |
| flavin containing monooxygenase 6 pseudogene                                          | FMO6P               | 0,93 |
| calcium/calmodulin-dependent protein kinase II inhibitor 2                            | CAMK2N2             | 0,93 |
| ribonuclease, RNase A family, 10 (non-active)                                         | RNASE10             | 0,93 |
| gamma-glutamylamine cyclotransferase                                                  | GGACT               | 0,93 |
| KH domain containing, RNA binding, signal transduction associated 2                   | KHDRBS2             | 0,93 |
| lipase, gastric                                                                       | LIPF                | 0,93 |
| R-spondin 4                                                                           | RSPO4               | 0,93 |
| desmocollin 1                                                                         | DSC1                | 0,93 |
| Memczak2013 ANTISENSE, CDS, coding, INTERNAL best transcript NM_198525                | KIF7                | 0,93 |
| microRNA 5195; immunoglobulin heavy variable 5-78 (pseudogene)                        | MIR5195; IGHV5-78   | 0,93 |
| RAB24, member RAS oncogene family                                                     | RAB24               | 0,93 |

|                                                                                                                                                                                                                                                                                                                                                                                                                                                               |                                    |      |
|---------------------------------------------------------------------------------------------------------------------------------------------------------------------------------------------------------------------------------------------------------------------------------------------------------------------------------------------------------------------------------------------------------------------------------------------------------------|------------------------------------|------|
| Homo sapiens uncharacterized LOC150527 (TISP43), transcript variant 1, non-coding RNA.; Homo sapiens uncharacterized LOC150527 (TISP43), transcript variant 2, non-coding RNA.; Homo sapiens uncharacterized LOC646743 (LOC646743), non-coding RNA.; Transcript Identified by AceView, Entrez Gene ID(s) 150527; Transcript Identified by AceView, Entrez Gene ID(s) 150527, RefSeq ID(s) NR_027313; uncharacterized LOC150527 [Source:EntrezGene;Acc:150527] | TISP43;<br>LOC646743;<br>LOC150527 | 0,93 |
| cytochrome c oxidase subunit VIa polypeptide 1                                                                                                                                                                                                                                                                                                                                                                                                                | COX6A1                             | 0,93 |
| Fas ligand (TNF superfamily, member 6)                                                                                                                                                                                                                                                                                                                                                                                                                        | FASLG                              | 0,93 |
| olfactory receptor, family 4, subfamily Q, member 2 (gene/pseudogene)                                                                                                                                                                                                                                                                                                                                                                                         | OR4Q2                              | 0,93 |
| ankyrin repeat domain 45                                                                                                                                                                                                                                                                                                                                                                                                                                      | ANKRD45                            | 0,93 |
| LUC7-like                                                                                                                                                                                                                                                                                                                                                                                                                                                     | LUC7L                              | 0,93 |
| defensin, beta 135                                                                                                                                                                                                                                                                                                                                                                                                                                            | DEFB135                            | 0,93 |
| solute carrier family 35, member F4                                                                                                                                                                                                                                                                                                                                                                                                                           | SLC35F4                            | 0,93 |
| transmembrane 6 superfamily member 2                                                                                                                                                                                                                                                                                                                                                                                                                          | TM6SF2                             | 0,93 |
| RAN guanine nucleotide release factor                                                                                                                                                                                                                                                                                                                                                                                                                         | RANGRF                             | 0,93 |
| potassium channel, voltage gated Shaw related subfamily C, member 3                                                                                                                                                                                                                                                                                                                                                                                           | KCNC3                              | 0,93 |
| cell cycle associated protein 1                                                                                                                                                                                                                                                                                                                                                                                                                               | CAPRIN1                            | 0,93 |
| PR domain containing 5                                                                                                                                                                                                                                                                                                                                                                                                                                        | PRDM5                              | 0,93 |
| methyl-CpG binding domain protein 3-like 3                                                                                                                                                                                                                                                                                                                                                                                                                    | MBD3L3                             | 0,93 |
| poly(ADP-ribose) polymerase family member 15                                                                                                                                                                                                                                                                                                                                                                                                                  | PARP15                             | 0,93 |
| N-terminal EF-hand calcium binding protein 3                                                                                                                                                                                                                                                                                                                                                                                                                  | NECAB3                             | 0,93 |
| pyrin domain containing 2                                                                                                                                                                                                                                                                                                                                                                                                                                     | PYDC2                              | 0,93 |
| polymerase (RNA) mitochondrial (DNA directed)                                                                                                                                                                                                                                                                                                                                                                                                                 | POLRMT                             | 0,93 |
| coiled-coil domain containing 40                                                                                                                                                                                                                                                                                                                                                                                                                              | CCDC40                             | 0,93 |
| autophagy related 16-like 1                                                                                                                                                                                                                                                                                                                                                                                                                                   | ATG16L1                            | 0,93 |
| ADAM metallopeptidase domain 2                                                                                                                                                                                                                                                                                                                                                                                                                                | ADAM2                              | 0,93 |
| poly(A) binding protein interacting protein 2B                                                                                                                                                                                                                                                                                                                                                                                                                | PAIP2B                             | 0,93 |
| MANSC domain containing 1                                                                                                                                                                                                                                                                                                                                                                                                                                     | MANSC1                             | 0,93 |
| growth factor independent 1B transcription repressor                                                                                                                                                                                                                                                                                                                                                                                                          | GF11B                              | 0,93 |
| NME/NM23 family member 8                                                                                                                                                                                                                                                                                                                                                                                                                                      | NME8                               | 0,93 |
| claudin 34                                                                                                                                                                                                                                                                                                                                                                                                                                                    | CLDN34                             | 0,93 |
| WD repeat domain 33                                                                                                                                                                                                                                                                                                                                                                                                                                           | WDR33                              | 0,93 |
| family with sequence similarity 78, member A                                                                                                                                                                                                                                                                                                                                                                                                                  | FAM78A                             | 0,93 |
| K(lysine) acetyltransferase 6B                                                                                                                                                                                                                                                                                                                                                                                                                                | KAT6B                              | 0,93 |
| regulator of G-protein signaling 4                                                                                                                                                                                                                                                                                                                                                                                                                            | RGS4                               | 0,93 |
| odorant binding protein 2B                                                                                                                                                                                                                                                                                                                                                                                                                                    | OBP2B                              | 0,93 |
| zinc finger and BTB domain containing 25                                                                                                                                                                                                                                                                                                                                                                                                                      | ZBTB25                             | 0,93 |
| coiled-coil domain containing 86                                                                                                                                                                                                                                                                                                                                                                                                                              | CCDC86                             | 0,93 |
| spermatogenesis associated 45                                                                                                                                                                                                                                                                                                                                                                                                                                 | SPATA45                            | 0,93 |

|                                                                                  |           |      |
|----------------------------------------------------------------------------------|-----------|------|
| potassium channel, voltage gated eag related subfamily H, member 6               | KCNH6     | 0,93 |
| chromosome 10 open reading frame 62                                              | C10orf62  | 0,93 |
| cannabinoid receptor 1 (brain)                                                   | CNR1      | 0,93 |
| GRIP and coiled-coil domain containing 2                                         | GCC2      | 0,93 |
| cementum protein 1                                                               | CEMP1     | 0,93 |
| olfactory marker protein                                                         | OMP       | 0,93 |
| DEAD (Asp-Glu-Ala-Asp) box polypeptide 55                                        | DDX55     | 0,93 |
| Sp3 transcription factor                                                         | SP3       | 0,93 |
| homeobox C8                                                                      | HOXC8     | 0,93 |
| Memczak2013 ANTISENSE, CDS, coding, INTERNAL best transcript NM_006901           | MYO9A     | 0,93 |
| zinc finger protein 41                                                           | ZNF41     | 0,93 |
| long intergenic non-protein coding RNA 602                                       | LINC00602 | 0,93 |
| drosha, ribonuclease type III                                                    | DROSHA    | 0,93 |
| neuritin 1-like                                                                  | NRN1L     | 0,93 |
| tyrosinase-related protein 1                                                     | TYRP1     | 0,93 |
| CD226 molecule                                                                   | CD226     | 0,93 |
| Transcript Identified by AceView, Entrez Gene ID(s) 8242                         | KDM5C     | 0,93 |
| ATP synthase, H <sup>+</sup> transporting, mitochondrial Fo complex subunit B1   | ATP5F1    | 0,93 |
| ariadne RBR E3 ubiquitin protein ligase 2                                        | ARIH2     | 0,93 |
| suppressor of cytokine signaling 6                                               | SOCS6     | 0,93 |
| ubiquitin interaction motif containing 1                                         | UIMC1     | 0,93 |
| ring finger protein 224                                                          | RNF224    | 0,93 |
| heat shock protein, alpha-crystallin-related, B6                                 | HSPB6     | 0,93 |
| angiopoietin 1                                                                   | ANGPT1    | 0,93 |
| family with sequence similarity 91, member A1                                    | FAM91A1   | 0,93 |
| klotho                                                                           | KL        | 0,93 |
| phosphohistidine phosphatase 1                                                   | PHPT1     | 0,93 |
| intraflagellar transport 80                                                      | IFT80     | 0,93 |
| solute carrier family 5 (sodium/monocarboxylate cotransporter), member 8         | SLC5A8    | 0,93 |
| protein phosphatase 1, regulatory subunit 36                                     | PPP1R36   | 0,93 |
| ubiquitin specific peptidase 40                                                  | USP40     | 0,93 |
| solute carrier family 36, member 3                                               | SLC36A3   | 0,93 |
| family with sequence similarity 83, member C                                     | FAM83C    | 0,93 |
| CKLF-like MARVEL transmembrane domain containing 2                               | CMTM2     | 0,93 |
| calbindin 1                                                                      | CALB1     | 0,93 |
| glucosidase, alpha; neutral C                                                    | GANC      | 0,93 |
| solute carrier family 4 (anion exchanger), member 2                              | SLC4A2    | 0,93 |
| solute carrier family 7 (amino acid transporter light chain, L system), member 5 | SLC7A5    | 0,93 |
| S-antigen; retina and pineal gland (arrestin)                                    | SAG       | 0,93 |

|                                                                                                                                                                                                       |                  |      |
|-------------------------------------------------------------------------------------------------------------------------------------------------------------------------------------------------------|------------------|------|
| thioredoxin domain containing 8 (spermatzoa)                                                                                                                                                          | TXNDC8           | 0,93 |
| H1 histone family, member O, oocyte-specific                                                                                                                                                          | H1FOO            | 0,93 |
| CD37 molecule                                                                                                                                                                                         | CD37             | 0,93 |
| Memczak2013 ANTISENSE, coding, INTERNAL, intronic best transcript NM_002072; Transcript Identified by AceView                                                                                         | GNAQ; skeyplorbu | 0,93 |
| neuronal PAS domain protein 3                                                                                                                                                                         | NPAS3            | 0,93 |
| calcium channel, voltage-dependent, gamma subunit 3                                                                                                                                                   | CACNG3           | 0,93 |
| clathrin heavy chain linker domain containing 1                                                                                                                                                       | CLHC1            | 0,93 |
| BTB (POZ) domain containing 8                                                                                                                                                                         | BTBD8            | 0,93 |
| guanine nucleotide binding protein (G protein), gamma 5                                                                                                                                               | GNG5             | 0,93 |
| chorionic gonadotropin, beta polypeptide; chorionic gonadotropin, beta polypeptide 5                                                                                                                  | CGB; CGB5        | 0,93 |
| G protein-coupled receptor, class C, group 5, member D                                                                                                                                                | GPRC5D           | 0,93 |
| La ribonucleoprotein domain family, member 7                                                                                                                                                          | LARP7            | 0,93 |
| gastrin                                                                                                                                                                                               | GAST             | 0,93 |
| SRSF protein kinase 3                                                                                                                                                                                 | SRPK3            | 0,93 |
| SOS Ras/Rac guanine nucleotide exchange factor 1                                                                                                                                                      | SOS1             | 0,93 |
| zinc finger protein 112                                                                                                                                                                               | ZNF112           | 0,93 |
| V-set domain containing T cell activation inhibitor 1                                                                                                                                                 | VTCN1            | 0,93 |
| zinc finger protein 814                                                                                                                                                                               | ZNF814           | 0,93 |
| CD3e molecule, epsilon (CD3-TCR complex)                                                                                                                                                              | CD3E             | 0,93 |
| alkB homolog 4, lysine demethylase                                                                                                                                                                    | ALKBH4           | 0,93 |
| T-cell, immune regulator 1, ATPase, H <sup>+</sup> transporting, lysosomal V0 subunit A3                                                                                                              | TCIRG1           | 0,93 |
| myosin, heavy chain 6, cardiac muscle, alpha                                                                                                                                                          | MYH6             | 0,93 |
| Mov10 RISC complex RNA helicase like 1                                                                                                                                                                | MOV10L1          | 0,93 |
| hedgehog acyltransferase                                                                                                                                                                              | HHAT             | 0,93 |
| fatty acid desaturase 6                                                                                                                                                                               | FADS6            | 0,93 |
| Salzman2013 ANTISENSE, coding, INTERNAL, intronic best transcript NM_001034845                                                                                                                        | GALNTL6          | 0,93 |
| ubiquitin specific peptidase 29                                                                                                                                                                       | USP29            | 0,93 |
| family with sequence similarity 227, member A                                                                                                                                                         | FAM227A          | 0,93 |
| uncharacterized LOC100133091; Salzman2013 ANNOTATED, INTERNAL, ncRNA, OVEXON best transcript NR_029411; Transcript Identified by AceView, Entrez Gene ID(s) 554248; 100133091, RefSeq ID(s) NR_029411 | LOC100133091     | 0,93 |
| l(3)mbt-like 3 (Drosophila)                                                                                                                                                                           | L3MBTL3          | 0,93 |
| ribosomal RNA processing 36                                                                                                                                                                           | RRP36            | 0,93 |
| CD1c molecule                                                                                                                                                                                         | CD1C             | 0,93 |
| Transcript Identified by AceView, Entrez Gene ID(s) 23518                                                                                                                                             | R3HDM1           | 0,93 |
| alanyl-tRNA synthetase 2, mitochondrial                                                                                                                                                               | AARS2            | 0,93 |

|                                                                                                                                                 |                       |      |
|-------------------------------------------------------------------------------------------------------------------------------------------------|-----------------------|------|
| solute carrier family 35, member F4                                                                                                             | SLC35F4               | 0,93 |
| oxysterol binding protein                                                                                                                       | OSBP                  | 0,93 |
| coiled-coil domain containing 107                                                                                                               | CCDC107               | 0,93 |
| olfactory receptor, family 6, subfamily B, member 3                                                                                             | OR6B3                 | 0,93 |
| peptidylprolyl isomerase (cyclophilin)-like 1                                                                                                   | PPIL1                 | 0,93 |
| transmembrane protease, serine 5                                                                                                                | TMPRSS5               | 0,93 |
| colorectal neoplasia differentially expressed (non-protein coding)                                                                              | CRNDE                 | 0,93 |
| Jeck2013 ALT_ACCEPTOR, ALT_DONOR, coding, INTERNAL, intronic best transcript NM_178423                                                          | HDAC9                 | 0,93 |
| SCY1-like, kinase-like 3                                                                                                                        | SCYL3                 | 0,93 |
| protein tyrosine phosphatase, non-receptor type 6                                                                                               | PTPN6                 | 0,93 |
| X antigen family, member 3                                                                                                                      | XAGE3                 | 0,93 |
| acyl-CoA wax alcohol acyltransferase 2                                                                                                          | AWAT2                 | 0,93 |
| Zhang2013 ALT_ACCEPTOR, ALT_DONOR, coding, INTERNAL, intronic best transcript NM_032447; Transcript Identified by AceView                       | FBN3; mumari          | 0,93 |
| pyrroline-5-carboxylate reductase family, member 2; microRNA 6741                                                                               | PYCR2; MIR6741        | 0,93 |
| granzyme H                                                                                                                                      | GZMH                  | 0,93 |
| oocyte secreted protein 2                                                                                                                       | OOSP2                 | 0,93 |
| DLC1 Rho GTPase activating protein                                                                                                              | DLC1                  | 0,93 |
| nuclear receptor subfamily 1, group H, member 3                                                                                                 | NR1H3                 | 0,93 |
| coiled-coil domain containing 191                                                                                                               | CCDC191               | 0,93 |
| centrosomal protein 78kDa                                                                                                                       | CEP78                 | 0,93 |
| SPT20 homolog, SAGA complex component-like 1                                                                                                    | SUPT20HL1             | 0,93 |
| Memczak2013 ALT_ACCEPTOR, ALT_DONOR, coding, INTERNAL, intronic best transcript NM_001193522                                                    | FAM65A                | 0,93 |
| potassium channel tetramerization domain containing 19                                                                                          | KCTD19                | 0,93 |
| histone cluster 1, H3i                                                                                                                          | HIST1H3I              | 0,93 |
| chromosome 8 open reading frame 87                                                                                                              | C8orf87               | 0,93 |
| homeobox D12                                                                                                                                    | HOXD12                | 0,93 |
| solute carrier family 46, member 3                                                                                                              | SLC46A3               | 0,93 |
| CGG triplet repeat binding protein 1                                                                                                            | CGGBP1                | 0,93 |
| centrosomal protein 19kDa                                                                                                                       | CEP19                 | 0,93 |
| CUB and Sushi multiple domains 2                                                                                                                | CSMD2                 | 0,93 |
| MT-RNR2-like 8; microRNA 4485                                                                                                                   | MTRNR2L8; MIR4485     | 0,93 |
| adipogenesis regulatory factor; ankyrin repeat and GTPase domain Arf GTPase activating protein 11; BMS1 ribosome biogenesis factor pseudogene 3 | ADIRF; AGAP11; BMS1P3 | 0,93 |
| growth hormone releasing hormone receptor                                                                                                       | GHRHR                 | 0,93 |
| leukocyte immunoglobulin-like receptor, subfamily B (with TM and ITIM domains), member 4                                                        | LILRB4                | 0,93 |

|                                                                           |               |      |
|---------------------------------------------------------------------------|---------------|------|
| transmembrane protein 238                                                 | TMEM238       | 0,93 |
| kelch-like family member 24                                               | KLHL24        | 0,93 |
| UDP-GlcNAc:betaGal beta-1,3-N-acetylglucosaminyltransferase 5             | B3GNT5        | 0,93 |
| chromosome 11 open reading frame 97                                       | C11orf97      | 0,93 |
| kinetochore associated 1                                                  | KNTC1         | 0,93 |
| ubiquitin protein ligase E3A                                              | UBE3A         | 0,93 |
| HIG1 hypoxia inducible domain family, member 1A                           | HIGD1A        | 0,93 |
| profilin family, member 4                                                 | PFN4          | 0,93 |
| zinc finger protein 692                                                   | ZNF692        | 0,93 |
| toll-like receptor 8                                                      | TLR8          | 0,93 |
| ligand of numb-protein X 2                                                | LNK2          | 0,93 |
| oligodendrocyte lineage transcription factor 2                            | OLIG2         | 0,92 |
| chloride intracellular channel 6                                          | CLIC6         | 0,92 |
| pancreatic lipase-related protein 3                                       | PNLIPRP3      | 0,92 |
| valosin containing protein                                                | VCP           | 0,92 |
| cytidine monophosphate (UMP-CMP) kinase 1, cytosolic                      | CMPK1         | 0,92 |
| olfactory receptor, family 51, subfamily A, member 7                      | OR51A7        | 0,92 |
| KRAB-A domain containing 1                                                | KRBA1         | 0,92 |
| adhesion G protein-coupled receptor E3                                    | ADGRE3        | 0,92 |
| RAB11 family interacting protein 1 (class I)                              | RAB11FIP1     | 0,92 |
| sodium leak channel, non selective                                        | NALCN         | 0,92 |
| solute carrier family 28 (concentrative nucleoside transporter), member 3 | SLC28A3       | 0,92 |
| homer scaffolding protein 1                                               | HOMER1        | 0,92 |
| amelogenin, X-linked                                                      | AMELX         | 0,92 |
| solute carrier family 2 (facilitated glucose transporter), member 11      | SLC2A11       | 0,92 |
| RNA binding motif protein, X-linked-like 2                                | RBMXL2        | 0,92 |
| filamin B, beta                                                           | FLNB          | 0,92 |
| O-linked N-acetylglucosamine (GlcNAc) transferase                         | OGT           | 0,92 |
| E2F transcription factor 2                                                | E2F2          | 0,92 |
| DNAJC25-GNG10 readthrough                                                 | DNAJC25-GNG10 | 0,92 |
| ankyrin repeat and kinase domain containing 1                             | ANKK1         | 0,92 |
| myogenic factor 6 (herculin)                                              | MYF6          | 0,92 |
| proline rich 15                                                           | PRR15         | 0,92 |
| tumor necrosis factor receptor superfamily, member 10b                    | TNFRSF10B     | 0,92 |
| taste receptor, type 2, member 20                                         | TAS2R20       | 0,92 |
| death-domain associated protein                                           | DAXX          | 0,92 |
| solute carrier family 17, member 4                                        | SLC17A4       | 0,92 |
| NDC1 transmembrane nucleoporin                                            | NDC1          | 0,92 |
| fibroblast growth factor binding protein 2                                | FGFBP2        | 0,92 |
| olfactory receptor, family 2, subfamily F, member 2                       | OR2F2         | 0,92 |
| taxilin gamma                                                             | TXLNG         | 0,92 |

|                                                                                           |                             |      |
|-------------------------------------------------------------------------------------------|-----------------------------|------|
| SERTA domain containing 2                                                                 | SERTAD2                     | 0,92 |
| E74-like factor 1 (ets domain transcription factor)                                       | ELF1                        | 0,92 |
| prostate androgen-regulated mucin-like protein 1                                          | PARM1                       | 0,92 |
| sosondowah ankyrin repeat domain family member D                                          | SOWAHD                      | 0,92 |
| chromosome 12 open reading frame 73                                                       | C12orf73                    | 0,92 |
| zinc finger, FYVE domain containing 19                                                    | ZFYVE19                     | 0,92 |
| lipolysis stimulated lipoprotein receptor                                                 | LSR                         | 0,92 |
| family with sequence similarity 107, member A                                             | FAM107A                     | 0,92 |
| signal recognition particle 72kDa                                                         | SRP72                       | 0,92 |
| ring finger protein 182                                                                   | RNF182                      | 0,92 |
| Memczak2013 ANTISENSE, CDS, coding, INTERNAL best transcript NM_000250                    | MPO                         | 0,92 |
| Transcript Identified by AceView, Entrez Gene ID(s) 55315                                 | SLC29A3                     | 0,92 |
| dynein heavy chain -like pseudogene; TEC                                                  | LOC730668;<br>CITF22-92A6.2 | 0,92 |
| family with sequence similarity 129, member A                                             | FAM129A                     | 0,92 |
| WD repeat domain 83                                                                       | WDR83                       | 0,92 |
| olfactory receptor, family 5, subfamily H, member 14                                      | OR5H14                      | 0,92 |
| activating signal cointegrator 1 complex subunit 1                                        | ASCC1                       | 0,92 |
| zinc finger protein 316                                                                   | ZNF316                      | 0,92 |
| leucyl-tRNA synthetase                                                                    | LARS                        | 0,92 |
| WAP four-disulfide core domain 9                                                          | WFDC9                       | 0,92 |
| defensin, beta 109, pseudogene 1B                                                         | DEFB109P1B                  | 0,92 |
| wingless-type MMTV integration site family, member 3                                      | WNT3                        | 0,92 |
| poly(A) binding protein, cytoplasmic 1-like 2B                                            | PABPC1L2B                   | 0,92 |
| tropomodulin 2 (neuronal)                                                                 | TMOD2                       | 0,92 |
| potassium channel, two pore domain subfamily K, member 6                                  | KCNK6                       | 0,92 |
| interferon regulatory factor 6                                                            | IRF6                        | 0,92 |
| neuroblastoma breakpoint family, member 14                                                | NBPF14                      | 0,92 |
| chorionic gonadotropin, beta polypeptide 8                                                | CGB8                        | 0,92 |
| 3-hydroxyacyl-CoA dehydratase 4                                                           | HACD4                       | 0,92 |
| testis-specific serine kinase 6                                                           | TSSK6                       | 0,92 |
| neuroblastoma breakpoint family, member 10                                                | NBPF10                      | 0,92 |
| Transcript Identified by AceView, Entrez Gene ID(s) 153562                                | MARVELD2                    | 0,92 |
| Salzman2013 ALT_ACCEPTOR, ALT_DONOR, coding, INTERNAL, intronic best transcript NM_152513 | MEI1                        | 0,92 |
| sodium channel, voltage gated, type II beta subunit                                       | SCN2B                       | 0,92 |
| tumor protein, translationally-controlled 1; small nucleolar RNA, H/ACA box 31            | TPT1; SNORA31               | 0,92 |
| chromosome 1 open reading frame 167                                                       | C1orf167                    | 0,92 |
| heparan sulfate 6-O-sulfotransferase 2                                                    | HS6ST2                      | 0,92 |

|                                                                                                                              |                             |      |
|------------------------------------------------------------------------------------------------------------------------------|-----------------------------|------|
| Transcript Identified by AceView, Entrez Gene ID(s) 92691                                                                    | TMEM169                     | 0,92 |
| gonadotropin releasing hormone 1                                                                                             | GNRH1                       | 0,92 |
| cancer/testis antigen 1B; cancer/testis antigen 1A                                                                           | CTAG1B; CTAG1A              | 0,92 |
| zinc finger RNA binding protein                                                                                              | ZFR                         | 0,92 |
| v-ral simian leukemia viral oncogene homolog A (ras related)                                                                 | RALA                        | 0,92 |
| cytochrome c oxidase subunit VIIb2                                                                                           | COX7B2                      | 0,92 |
| neurogenin 2                                                                                                                 | NEUROG2                     | 0,92 |
| nuclear receptor corepressor 1                                                                                               | NCOR1                       | 0,92 |
| von Hippel-Lindau tumor suppressor-like                                                                                      | VHLL                        | 0,92 |
| gamma-aminobutyric acid (GABA) A receptor, theta                                                                             | GABRQ                       | 0,92 |
| potassium voltage-gated channel, modifier subfamily S, member 1                                                              | KCNS1                       | 0,92 |
| olfactory receptor, family 51, subfamily A, member 2                                                                         | OR51A2                      | 0,92 |
| RUN domain containing 3B                                                                                                     | RUNDC3B                     | 0,92 |
| Transcript Identified by AceView, Entrez Gene ID(s) 23126                                                                    | POGZ                        | 0,92 |
| carbohydrate (N-acetylglucosamine 6-O) sulfotransferase 4                                                                    | CHST4                       | 0,92 |
| spermidine/spermine N1-acetyltransferase family member 2                                                                     | SAT2                        | 0,92 |
| immunoglobulin superfamily, member 10                                                                                        | IGSF10                      | 0,92 |
| surfactant protein C                                                                                                         | SFTPC                       | 0,92 |
| V-set and transmembrane domain containing 2B                                                                                 | VSTM2B                      | 0,92 |
| glutaminase 2 (liver, mitochondrial)                                                                                         | GLS2                        | 0,92 |
| NHS-like 2                                                                                                                   | NHSL2                       | 0,92 |
| indolethylamine N-methyltransferase; family with sequence similarity 188, member B; INMT-FAM188B readthrough (NMD candidate) | INMT; FAM188B; INMT-FAM188B | 0,92 |
| lipase, endothelial                                                                                                          | LIPG                        | 0,92 |
| methyl-CpG binding domain protein 3-like 5                                                                                   | MBD3L5                      | 0,92 |
| olfactory receptor, family 10, subfamily A, member 4                                                                         | OR10A4                      | 0,92 |
| PRAME family member 2                                                                                                        | PRAMEF2                     | 0,92 |
| potassium channel, sodium activated subfamily T, member 2                                                                    | KCNT2                       | 0,92 |
| thymocyte expressed, positive selection associated 1                                                                         | TESPA1                      | 0,92 |
| gap junction protein alpha 5                                                                                                 | GJA5                        | 0,92 |
| adaptor-related protein complex 3, delta 1 subunit                                                                           | AP3D1                       | 0,92 |
| nuclear factor of activated T-cells, cytoplasmic, calcineurin-dependent 1                                                    | NFATC1                      | 0,92 |
| proteasome 26S subunit, ATPase 5                                                                                             | PSMC5                       | 0,92 |
| G protein-coupled receptor 12                                                                                                | GPR12                       | 0,92 |
| chromosome 3 open reading frame 18                                                                                           | C3orf18                     | 0,92 |



|                                                                                |         |      |
|--------------------------------------------------------------------------------|---------|------|
| solute carrier family 20 (phosphate transporter), member 2                     | SLC20A2 | 0,92 |
| RAD50 homolog, double strand break repair protein                              | RAD50   | 0,92 |
| olfactory receptor, family 5, subfamily D, member 14                           | OR5D14  | 0,92 |
| cytochrome P450, family 2, subfamily C, polypeptide 19                         | CYP2C19 | 0,92 |
| zinc finger, CCHC domain containing 10                                         | ZCCHC10 | 0,92 |
| potassium channel, inwardly rectifying subfamily J, member 15                  | KCNJ15  | 0,92 |
| olfactory receptor, family 1, subfamily L, member 3                            | OR1L3   | 0,92 |
| microsomal glutathione S-transferase 3                                         | MGST3   | 0,92 |
| translocase of inner mitochondrial membrane 8 homolog A (yeast)                | TIMM8A  | 0,92 |
| toll-like receptor 5                                                           | TLR5    | 0,92 |
| tripartite motif containing 40                                                 | TRIM40  | 0,92 |
| ADAM metallopeptidase domain 29                                                | ADAM29  | 0,92 |
| claudin 14                                                                     | CLDN14  | 0,92 |
| male-specific lethal 2 homolog (Drosophila)                                    | MSL2    | 0,92 |
| butyrophilin, subfamily 1, member A1                                           | BTN1A1  | 0,92 |
| zinc finger protein 687                                                        | ZNF687  | 0,92 |
| erb-b2 receptor tyrosine kinase 2                                              | ERBB2   | 0,92 |
| wingless-type MMTV integration site family, member 8B                          | WNT8B   | 0,92 |
| ubiquitin-like with PHD and ring finger domains 2, E3 ubiquitin protein ligase | UHRF2   | 0,92 |
| G protein-coupled receptor 150                                                 | GPR150  | 0,92 |
| Fas apoptotic inhibitory molecule 2                                            | FAIM2   | 0,92 |
| protein phosphatase 1, catalytic subunit, beta isozyme                         | PPP1CB  | 0,92 |
| prefoldin subunit 2                                                            | PFDN2   | 0,92 |
| transient receptor potential cation channel, subfamily A, member 1             | TRPA1   | 0,92 |
| chondrolectin                                                                  | CHODL   | 0,92 |
| interleukin 17A                                                                | IL17A   | 0,92 |
| sorting nexin 25                                                               | SNX25   | 0,92 |
| acylglycerol kinase                                                            | AGK     | 0,92 |
| interleukin 31                                                                 | IL31    | 0,92 |
| TBC1 domain family, member 3E                                                  | TBC1D3E | 0,92 |
| scavenger receptor class F, member 1                                           | SCARF1  | 0,92 |
| piggyBac transposable element derived 2                                        | PGBD2   | 0,92 |
| scratch family zinc finger 1                                                   | SCRT1   | 0,92 |
| transient receptor potential cation channel, subfamily C, member 5             | TRPC5   | 0,92 |
| UPF3 regulator of nonsense transcripts homolog A (yeast)                       | UPF3A   | 0,92 |
| prolactin releasing hormone                                                    | PRLH    | 0,92 |
| nucleotide binding protein 2                                                   | NUBP2   | 0,92 |

|                                                                                                                                                                                                |                               |      |
|------------------------------------------------------------------------------------------------------------------------------------------------------------------------------------------------|-------------------------------|------|
| EPH receptor A3                                                                                                                                                                                | EPHA3                         | 0,92 |
| ribosomal protein L24                                                                                                                                                                          | RPL24                         | 0,92 |
| fibroblast growth factor 10                                                                                                                                                                    | FGF10                         | 0,92 |
| RAD51 paralog D                                                                                                                                                                                | RAD51D                        | 0,92 |
| RNA binding motif protein 12B                                                                                                                                                                  | RBM12B                        | 0,92 |
| aldo-keto reductase family 1, member E2                                                                                                                                                        | AKR1E2                        | 0,92 |
| protein kinase, AMP-activated, gamma 3 non-catalytic subunit                                                                                                                                   | PRKAG3                        | 0,92 |
| family with sequence similarity 209, member A                                                                                                                                                  | FAM209A                       | 0,92 |
| solute carrier family 12, member 9                                                                                                                                                             | SLC12A9                       | 0,92 |
| myosin XVI                                                                                                                                                                                     | MYO16                         | 0,92 |
| olfactory receptor, family 1, subfamily L, member 6                                                                                                                                            | OR1L6                         | 0,92 |
| olfactory receptor, family 6, subfamily F, member 1;<br>olfactory receptor, family 14, subfamily A, member 2                                                                                   | OR6F1; OR14A2                 | 0,92 |
| nuclear transcription factor Y subunit beta                                                                                                                                                    | NFYB                          | 0,92 |
| coenzyme Q9                                                                                                                                                                                    | COQ9                          | 0,92 |
| MMS19 homolog, cytosolic iron-sulfur assembly component                                                                                                                                        | MMS19                         | 0,92 |
| family with sequence similarity 126, member B                                                                                                                                                  | FAM126B                       | 0,92 |
| synaptonemal complex central element protein 3                                                                                                                                                 | SYCE3                         | 0,92 |
| dynein, light chain, LC8-type 1                                                                                                                                                                | DYNLL1                        | 0,92 |
| forkhead box B2                                                                                                                                                                                | FOXB2                         | 0,92 |
| CD1a molecule                                                                                                                                                                                  | CD1A                          | 0,92 |
| G protein-coupled receptor 6                                                                                                                                                                   | GPR6                          | 0,92 |
| Rho guanine nucleotide exchange factor 4                                                                                                                                                       | ARHGEF4                       | 0,92 |
| FSHD region gene 1                                                                                                                                                                             | FRG1                          | 0,92 |
| transmembrane protein 221                                                                                                                                                                      | TMEM221                       | 0,92 |
| CD47 molecule                                                                                                                                                                                  | CD47                          | 0,92 |
| SH3-domain GRB2-like 2                                                                                                                                                                         | SH3GL2                        | 0,92 |
| hypoxia up-regulated 1                                                                                                                                                                         | HYOU1                         | 0,92 |
| microtubule-associated protein 1 light chain 3 beta 2                                                                                                                                          | MAP1LC3B2                     | 0,92 |
| S-antigen; retina and pineal gland (arrestin)                                                                                                                                                  | SAG                           | 0,92 |
| lon peptidase 2, peroxisomal                                                                                                                                                                   | LONP2                         | 0,92 |
| sema domain, transmembrane domain (TM), and cytoplasmic domain, (semaphorin) 6D                                                                                                                | SEMA6D                        | 0,92 |
| Homo sapiens MGC57346-CRHR1 readthrough (MGC57346-CRHR1), transcript variant 5, mRNA.; Homo sapiens MGC57346-CRHR1 readthrough (MGC57346-CRHR1), transcript variant 6, mRNA.; novel transcript | MGC57346-CRHR1; RP11-105N13.4 | 0,92 |
| family with sequence similarity 64, member A                                                                                                                                                   | FAM64A                        | 0,92 |
| paired box 9                                                                                                                                                                                   | PAX9                          | 0,92 |
| phosphodiesterase 10A                                                                                                                                                                          | PDE10A                        | 0,92 |
| cilia and flagella associated protein 157                                                                                                                                                      | CFAP157                       | 0,92 |
| ubiquitin conjugating enzyme E2G 2                                                                                                                                                             | UBE2G2                        | 0,92 |
| zinc finger protein 343                                                                                                                                                                        | ZNF343                        | 0,92 |

|                                                                             |                      |      |
|-----------------------------------------------------------------------------|----------------------|------|
| acyl-CoA thioesterase 12                                                    | ACOT12               | 0,92 |
| chymotrypsinogen B1                                                         | CTRB1                | 0,92 |
| olfactory receptor, family 4, subfamily F, member 21                        | OR4F21               | 0,92 |
| ribosomal protein S6 kinase, 90kDa, polypeptide 1                           | RPS6KA1              | 0,92 |
| receptor accessory protein 4                                                | REEP4                | 0,92 |
| novel transcript; Transcript Identified by AceView, Entrez Gene ID(s) 79634 | AC010894.3;<br>SCRN3 | 0,92 |
| chromosome 1 open reading frame 145                                         | C1orf145             | 0,92 |
| calcyon neuron-specific vesicular protein                                   | CALY                 | 0,92 |
| lethal giant larvae homolog 1 (Drosophila)                                  | LLGL1                | 0,92 |
| TBC1 domain family, member 25                                               | TBC1D25              | 0,92 |
| PRAME family member 13                                                      | PRAMEF13             | 0,92 |
| REC114 meiotic recombination protein                                        | REC114               | 0,92 |
| Jeck2013 ANTISENSE, coding, INTERNAL, intronic best transcript NM_173688    | NKAIN3               | 0,92 |
| leucine-rich repeats and death domain containing 1                          | LRRD1                | 0,92 |
| olfactory receptor, family 2, subfamily T, member 5                         | OR2T5                | 0,92 |
| solute carrier family 6 (neurotransmitter transporter), member 1            | SLC6A1               | 0,92 |
| contactin associated protein-like 2                                         | CNTNAP2              | 0,92 |
| endothelial cell-specific molecule 1                                        | ESM1                 | 0,92 |
| carcinoembryonic antigen-related cell adhesion molecule 18                  | CEACAM18             | 0,92 |
| LINGO1 antisense RNA 1                                                      | LINGO1-AS1           | 0,92 |
| proline rich 25                                                             | PRR25                | 0,92 |
| TBC1 domain family, member 29                                               | TBC1D29              | 0,92 |
| dual specificity phosphatase 15                                             | DUSP15               | 0,92 |
| potassium channel tetramerization domain containing 12                      | KCTD12               | 0,92 |
| collapsin response mediator protein 1                                       | CRMP1                | 0,92 |
| family with sequence similarity 71, member B                                | FAM71B               | 0,92 |
| chromatin assembly factor 1, subunit B (p60)                                | CHAF1B               | 0,92 |
| rogdi homolog                                                               | ROGDI                | 0,92 |
| cold shock domain containing E1, RNA binding                                | CSDE1                | 0,92 |
| Transcript Identified by AceView, Entrez Gene ID(s) 108                     | ADCY2                | 0,92 |
| olfactory receptor, family 2, subfamily S, member 2 (gene/pseudogene)       | OR2S2                | 0,92 |
| interleukin 17D                                                             | IL17D                | 0,92 |
| cytochrome P450, family 2, subfamily C, polypeptide 8                       | CYP2C8               | 0,92 |
| SERTA domain containing 4                                                   | SERTAD4              | 0,92 |
| G protein-coupled receptor 146                                              | GPR146               | 0,92 |
| keratin associated protein 19-1                                             | KRTAP19-1            | 0,92 |
| trans-2,3-enoyl-CoA reductase-like                                          | TECRL                | 0,92 |
| septin 11                                                                   | sept-11              | 0,92 |
| spectrin, beta, non-erythrocytic 5                                          | SPTBN5               | 0,92 |

|                                                                                                                      |                 |      |
|----------------------------------------------------------------------------------------------------------------------|-----------------|------|
| eukaryotic translation elongation factor 1 epsilon 1                                                                 | EEF1E1          | 0,92 |
| SEC14-like lipid binding 3                                                                                           | SEC14L3         | 0,92 |
| serine/arginine-rich splicing factor 11                                                                              | SRSF11          | 0,92 |
| keratin associated protein 26-1                                                                                      | KRTAP26-1       | 0,92 |
| anoctamin 5                                                                                                          | ANO5            | 0,92 |
| testis expressed 261                                                                                                 | TEX261          | 0,92 |
| actin-related protein T1                                                                                             | ACTRT1          | 0,92 |
| ciliary rootlet coiled-coil, rootletin                                                                               | CROCC           | 0,92 |
| leucine-rich repeat, immunoglobulin-like and transmembrane domains 2                                                 | LRIT2           | 0,92 |
| fibroblast growth factor 16                                                                                          | FGF16           | 0,92 |
| cysteine-rich secretory protein 2                                                                                    | CRISP2          | 0,92 |
| protocadherin beta 15                                                                                                | PCDHB15         | 0,92 |
| transducin (beta)-like 1 X-linked receptor 1                                                                         | TBL1XR1         | 0,92 |
| chromosome 7 open reading frame 26                                                                                   | C7orf26         | 0,92 |
| free fatty acid receptor 2                                                                                           | FFAR2           | 0,92 |
| tigger transposable element derived 7                                                                                | TIGD7           | 0,92 |
| UBX domain protein 6                                                                                                 | UBXN6           | 0,92 |
| coiled-coil domain containing 127                                                                                    | CCDC127         | 0,92 |
| neuron-derived neurotrophic factor                                                                                   | NDNF            | 0,92 |
| aldo-keto reductase family 1, member A1 (aldehyde reductase)                                                         | AKR1A1          | 0,92 |
| guanylate cyclase 2D, membrane (retina-specific)                                                                     | GUCY2D          | 0,92 |
| tripartite motif containing 56                                                                                       | TRIM56          | 0,92 |
| TIMP metalloproteinase inhibitor 4                                                                                   | TIMP4           | 0,92 |
| chromosome 9 open reading frame 92                                                                                   | C9orf92         | 0,92 |
| tubulin, gamma 1                                                                                                     | TUBG1           | 0,92 |
| profilin 3                                                                                                           | PFN3            | 0,92 |
| notch 4                                                                                                              | NOTCH4          | 0,92 |
| secretoglobin, family 2A, member 1                                                                                   | SCGB2A1         | 0,92 |
| actin, beta-like 2                                                                                                   | ACTBL2          | 0,92 |
| transcription elongation factor B polypeptide 3C-like; transcription elongation factor B polypeptide 3C (elongin A3) | TCEB3CL; TCEB3C | 0,92 |
| cerberus 1, DAN family BMP antagonist                                                                                | CER1            | 0,92 |
| Memczak2013 ALT_ACCEPTOR, ALT_DONOR, coding, INTERNAL, intronic best transcript NM_001130110                         | SETBP1          | 0,92 |
| ABHD14A-ACY1 readthrough                                                                                             | ABHD14A-ACY1    | 0,92 |
| protein tyrosine kinase 6                                                                                            | PTK6            | 0,92 |
| RAS p21 protein activator 3                                                                                          | RASA3           | 0,92 |
| small integral membrane protein 8                                                                                    | SMIM8           | 0,92 |
| retinal outer segment membrane protein 1                                                                             | ROM1            | 0,92 |
| major histocompatibility complex, class I, A                                                                         | HLA-A           | 0,92 |
| paraoxonase 1                                                                                                        | PON1            | 0,92 |
| protocadherin 11 Y-linked                                                                                            | PCDH11Y         | 0,92 |

|                                                                                           |                     |      |
|-------------------------------------------------------------------------------------------|---------------------|------|
| secretin                                                                                  | SCT                 | 0,92 |
| zinc finger protein 441                                                                   | ZNF441              | 0,92 |
| ribosomal protein, large, P2; small nucleolar RNA, H/ACA box 52                           | RPLP2; SNORA52      | 0,92 |
| homeobox C9                                                                               | HOXC9               | 0,92 |
| family with sequence similarity 149, member A                                             | FAM149A             | 0,92 |
| bone morphogenetic protein 8b                                                             | BMP8B               | 0,92 |
| pregnancy up-regulated nonubiquitous CaM kinase                                           | PNCK                | 0,92 |
| UTP23, small subunit (SSU) processome component, homolog (yeast)                          | UTP23               | 0,92 |
| MIR205 host gene; microRNA 205                                                            | MIR205HG;<br>MIR205 | 0,92 |
| von Willebrand factor A domain containing 5B2                                             | VWA5B2              | 0,92 |
| acid sensing ion channel family member 4                                                  | ASIC4               | 0,92 |
| leucine rich repeat transmembrane neuronal 2                                              | LRRTM2              | 0,92 |
| phosphate regulating endopeptidase homolog, X-linked                                      | PHEX                | 0,92 |
| NAD synthetase 1                                                                          | NADSYN1             | 0,92 |
| iron-sulfur cluster assembly 1                                                            | ISCA1               | 0,92 |
| ribosomal protein L41 pseudogene 5                                                        | RPL41P5             | 0,92 |
| carbonic anhydrase X                                                                      | CA10                | 0,92 |
| cadherin, EGF LAG seven-pass G-type receptor 1                                            | CELSR1              | 0,92 |
| PHD finger protein 21B                                                                    | PHF21B              | 0,92 |
| deoxyribonuclease I-like 2                                                                | DNASE1L2            | 0,92 |
| EP300 interacting inhibitor of differentiation 2                                          | EID2                | 0,92 |
| MRE11 homolog A, double strand break repair nuclease                                      | MRE11A              | 0,92 |
| adhesion G protein-coupled receptor G2                                                    | ADGRG2              | 0,92 |
| zona pellucida binding protein                                                            | ZBPB                | 0,92 |
| transient receptor potential cation channel, subfamily M, member 8                        | TRPM8               | 0,92 |
| density-regulated protein                                                                 | DENR                | 0,92 |
| cAMP-regulated phosphoprotein 21kDa                                                       | ARPP21              | 0,92 |
| coiled-coil domain containing 140                                                         | CCDC140             | 0,92 |
| C3 and PZP-like, alpha-2-macroglobulin domain containing 8                                | CPAMD8              | 0,92 |
| Transcript Identified by AceView, Entrez Gene ID(s) 4952                                  | OCRL                | 0,92 |
| interferon, lambda 4 (gene/pseudogene)                                                    | IFNL4               | 0,92 |
| t-complex-associated-testis-expressed 3                                                   | TCTE3               | 0,92 |
| SIX homeobox 2                                                                            | SIX2                | 0,92 |
| CD247 molecule                                                                            | CD247               | 0,92 |
| serine incorporator 4                                                                     | SERINC4             | 0,92 |
| autophagy related 101                                                                     | ATG101              | 0,92 |
| cholecystokinin A receptor                                                                | CCKAR               | 0,92 |
| Memczak2013 ALT_ACCEPTOR, ALT_DONOR, coding, INTERNAL, intronic best transcript NM_170721 | MSI2                | 0,92 |

|                                                                                                                       |                              |      |
|-----------------------------------------------------------------------------------------------------------------------|------------------------------|------|
| protein phosphatase 3, regulatory subunit B, alpha                                                                    | PPP3R1                       | 0,92 |
| coiled-coil domain containing 174                                                                                     | CCDC174                      | 0,92 |
| zinc finger, GATA-like protein 1                                                                                      | ZGLP1                        | 0,91 |
| glutamine and serine rich 1                                                                                           | QSER1                        | 0,91 |
| olfactory receptor, family 6, subfamily C, member 75                                                                  | OR6C75                       | 0,91 |
| peroxisomal biogenesis factor 11 gamma                                                                                | PEX11G                       | 0,91 |
| MGAT4 family, member D                                                                                                | MGAT4D                       | 0,91 |
| protein tyrosine phosphatase, non-receptor type 13 (APO-1/CD95 (Fas)-associated phosphatase)                          | PTPN13                       | 0,91 |
| THO complex 5                                                                                                         | THOC5                        | 0,91 |
| SCP2 sterol-binding domain containing 1                                                                               | SCP2D1                       | 0,91 |
| leucine rich repeat containing 37A                                                                                    | LRRC37A                      | 0,91 |
| nucleolin                                                                                                             | NCL                          | 0,91 |
| uncharacterized LOC100128554; Transcript Identified by AceView, Entrez Gene ID(s) 144678; 100128554; novel transcript | LOC100128554;<br>RP5-944M2.3 | 0,91 |
| diacylglycerol kinase, delta 130kDa                                                                                   | DGKD                         | 0,91 |
| poly(A) binding protein, nuclear 1-like (cytoplasmic)                                                                 | PABPN1L                      | 0,91 |
| Transcript Identified by AceView, Entrez Gene ID(s) 57553                                                             | MICAL3                       | 0,91 |
| sphingosine-1-phosphate receptor 4                                                                                    | S1PR4                        | 0,91 |
| homeobox A11                                                                                                          | HOXA11                       | 0,91 |
| MIR22 host gene                                                                                                       | MIR22HG                      | 0,91 |
| GLI pathogenesis-related 1 like 1                                                                                     | GLIPR1L1                     | 0,91 |
| ZFP91 zinc finger protein                                                                                             | ZFP91                        | 0,91 |
| interleukin 36, beta                                                                                                  | IL36B                        | 0,91 |
| eukaryotic translation initiation factor 3, subunit L                                                                 | EIF3L                        | 0,91 |
| Memczak2013 ANTISENSE, CDS, coding, INTERNAL, intronic best transcript NM_004579                                      | MAP4K2                       | 0,91 |
| Transcript Identified by AceView, Entrez Gene ID(s) 161436                                                            | EML5                         | 0,91 |
| olfactory receptor, family 11, subfamily L, member 1                                                                  | OR11L1                       | 0,91 |
| DnaJ (Hsp40) homolog, subfamily C, member 16                                                                          | DNAJC16                      | 0,91 |
| Transcript Identified by AceView, Entrez Gene ID(s) 7837                                                              | PXDN                         | 0,91 |
| prostate and testis expressed 1                                                                                       | PATE1                        | 0,91 |
| tudor domain containing 9                                                                                             | TDRD9                        | 0,91 |
| SH3 and multiple ankyrin repeat domains 2                                                                             | SHANK2                       | 0,91 |
| Rieske (Fe-S) domain containing                                                                                       | RFESD                        | 0,91 |
| G protein-coupled receptor 152                                                                                        | GPR152                       | 0,91 |
| olfactory receptor, family 13, subfamily C, member 2                                                                  | OR13C2                       | 0,91 |
| sema domain, immunoglobulin domain (Ig), short basic domain, secreted, (semaphorin) 3A                                | SEMA3A                       | 0,91 |
| FERM and PDZ domain containing 2B, pseudogene; FERM and PDZ domain containing 2                                       | FRMPD2B;<br>FRMPD2           | 0,91 |

|                                                                                                           |                             |      |
|-----------------------------------------------------------------------------------------------------------|-----------------------------|------|
| oligophrenin 1                                                                                            | OPHN1                       | 0,91 |
| zinc finger protein 775                                                                                   | ZNF775                      | 0,91 |
| adenomatous polyposis coli                                                                                | APC                         | 0,91 |
| olfactory receptor, family 51, subfamily T, member 1                                                      | OR51T1                      | 0,91 |
| DEAD (Asp-Glu-Ala-Asp) box polypeptide 19B                                                                | DDX19B                      | 0,91 |
| ribosomal protein S6 kinase, 90kDa, polypeptide 6                                                         | RPS6KA6                     | 0,91 |
| ER membrane protein complex subunit 1                                                                     | EMC1                        | 0,91 |
| Jeck2013 ANTISENSE, coding, INTERNAL, OVEXON, UTR3<br>best transcript NM_001039690                        | CHTF8                       | 0,91 |
| microRNA 650; immunoglobulin lambda variable 3-9<br>(gene/pseudogene); immunoglobulin lambda variable 2-8 | MIR650; IGLV3-9;<br>IGLV2-8 | 0,91 |
| transmembrane protein 232                                                                                 | TMEM232                     | 0,91 |
| CSNK1G2 antisense RNA 1                                                                                   | CSNK1G2-AS1                 | 0,91 |
| FCH and double SH3 domains 2                                                                              | FCHSD2                      | 0,91 |
| butyrophilin, subfamily 2, member A2                                                                      | BTN2A2                      | 0,91 |
| transcription elongation factor A (SII)-like 4                                                            | TCEAL4                      | 0,91 |
| ubiquitin conjugating enzyme E2E 1                                                                        | UBE2E1                      | 0,91 |
| GIMAP family P-loop NTPase domain containing 1                                                            | GIMD1                       | 0,91 |
| tachykinin receptor 2                                                                                     | TACR2                       | 0,91 |
| taste receptor, type 2, member 7                                                                          | TAS2R7                      | 0,91 |
| cytochrome P450, family 2, subfamily B, polypeptide 6                                                     | CYP2B6                      | 0,91 |
| NADH dehydrogenase (ubiquinone) 1 alpha subcomplex,<br>7, 14.5kDa                                         | NDUFA7                      | 0,91 |
| KH homology domain containing 1-like                                                                      | KHDC1L                      | 0,91 |
| NADH dehydrogenase (ubiquinone) 1 beta subcomplex, 5,<br>16kDa                                            | NDUFB5                      | 0,91 |
| Transcript Identified by AceView, Entrez Gene ID(s) 23250                                                 | ATP11A                      | 0,91 |
| DENN/MADD domain containing 1A                                                                            | DENND1A                     | 0,91 |
| zyg-11 related, cell cycle regulator                                                                      | ZER1                        | 0,91 |
| zinc finger protein 488                                                                                   | ZNF488                      | 0,91 |
| bradykinin receptor B2                                                                                    | BDKRB2                      | 0,91 |
| MORC family CW-type zinc finger 2                                                                         | MORC2                       | 0,91 |
| peroxisomal membrane protein 4                                                                            | PXMP4                       | 0,91 |
| chromosome 20 open reading frame 173                                                                      | C20orf173                   | 0,91 |
| FERM domain containing 4B                                                                                 | FRMD4B                      | 0,91 |
| histatin 3                                                                                                | HTN3                        | 0,91 |
| family with sequence similarity 217, member A                                                             | FAM217A                     | 0,91 |
| synemin, intermediate filament protein                                                                    | SYNM                        | 0,91 |
| DDB1 and CUL4 associated factor 6                                                                         | DCAF6                       | 0,91 |
| plasminogen receptor, C-terminal lysine transmembrane<br>protein                                          | PLGRKT                      | 0,91 |
| Morf4 family associated protein 1                                                                         | MRFAP1                      | 0,91 |

|                                                                                              |                                   |      |
|----------------------------------------------------------------------------------------------|-----------------------------------|------|
| TP53 target 3B; TP53 target 3; TP53 target 3C                                                | TP53TG3B;<br>TP53TG3;<br>TP53TG3C | 0,91 |
| Memczak2013 ALT_ACCEPTOR, ALT_DONOR, coding, INTERNAL, intronic best transcript NM_001040033 | CD53                              | 0,91 |
| T cell receptor associated transmembrane adaptor 1                                           | TRAT1                             | 0,91 |
| sodium channel, voltage gated, type X alpha subunit                                          | SCN10A                            | 0,91 |
| SIX homeobox 3                                                                               | SIX3                              | 0,91 |
| chromosome 14 open reading frame 37                                                          | C14orf37                          | 0,91 |
| negative regulator of reactive oxygen species                                                | NRROS                             | 0,91 |
| olfactory receptor, family 52, subfamily R, member 1 (gene/pseudogene)                       | OR52R1                            | 0,91 |
| A kinase (PRKA) anchor protein 11                                                            | AKAP11                            | 0,91 |
| Transcript Identified by AceView, Entrez Gene ID(s) 205564                                   | SENP5                             | 0,91 |
| uncharacterized LOC115110; novel transcript                                                  | LOC115110; RP3-395M20.8           | 0,91 |
| solute carrier family 17 (vesicular glutamate transporter), member 8                         | SLC17A8                           | 0,91 |
| olfactory receptor, family 2, subfamily T, member 4                                          | OR2T4                             | 0,91 |
| TAP binding protein-like                                                                     | TAPBPL                            | 0,91 |
| transglutaminase 1                                                                           | TGM1                              | 0,91 |
| vitamin K epoxide reductase complex subunit 1 like 1                                         | VKORC1L1                          | 0,91 |
| Williams-Beuren syndrome chromosome region 28                                                | WBSCR28                           | 0,91 |
| Transcript Identified by AceView, Entrez Gene ID(s) 65977                                    | PLEKHA3                           | 0,91 |
| glutathione S-transferase pi 1                                                               | GSTP1                             | 0,91 |
| UBX domain protein 2A                                                                        | UBXN2A                            | 0,91 |
| proline rich, lacrimal 1                                                                     | PROL1                             | 0,91 |
| dynein, axonemal, heavy chain 17                                                             | DNAH17                            | 0,91 |
| PDZ and LIM domain 3                                                                         | PDLIM3                            | 0,91 |
| WW domain binding protein 4                                                                  | WBP4                              | 0,91 |
| homeobox D11                                                                                 | HOXD11                            | 0,91 |
| germ cell associated 1                                                                       | GSG1                              | 0,91 |
| desmoglein 1                                                                                 | DSG1                              | 0,91 |
| Transcript Identified by AceView, Entrez Gene ID(s) 10659                                    | CELF2                             | 0,91 |
| peptidylprolyl cis/trans isomerase, NIMA-interacting 1                                       | PIN1                              | 0,91 |
| GATA binding protein 5                                                                       | GATA5                             | 0,91 |
| glypican 4                                                                                   | GPC4                              | 0,91 |
| Jeck2013 ALT_ACCEPTOR, ALT_DONOR, coding, INTERNAL, intronic best transcript NM_001080396    | FAM155A                           | 0,91 |
| olfactory receptor, family 1, subfamily G, member 1                                          | OR1G1                             | 0,91 |
| long intergenic non-protein coding RNA 935                                                   | LINC00935                         | 0,91 |
| coiled-coil domain containing 96                                                             | CCDC96                            | 0,91 |



|                                                                                                                                      |                                     |      |
|--------------------------------------------------------------------------------------------------------------------------------------|-------------------------------------|------|
| tetratricopeptide repeat domain 19                                                                                                   | TTC19                               | 0,91 |
| coiled-coil domain containing 47                                                                                                     | CCDC47                              | 0,91 |
| Transcript Identified by AceView, Entrez Gene ID(s) 8615                                                                             | USO1                                | 0,91 |
| tumor protein p63                                                                                                                    | TP63                                | 0,91 |
| ribonuclease, RNase A family, k6                                                                                                     | RNASE6                              | 0,91 |
| interleukin 1 receptor accessory protein-like 2                                                                                      | IL1RAPL2                            | 0,91 |
| glutamate rich 2                                                                                                                     | ERICH2                              | 0,91 |
| doublesex and mab-3 related transcription factor 1                                                                                   | DMRT1                               | 0,91 |
| serine/arginine-rich splicing factor 5                                                                                               | SRSF5                               | 0,91 |
| ATP binding cassette subfamily F member 1                                                                                            | ABCF1                               | 0,91 |
| Memczak2013 ALT_ACCEPTOR, coding, INTERNAL, intronic best transcript NM_001080443                                                    | KIF18B                              | 0,91 |
| solute carrier family 25 (mitochondrial carrier: glutamate), member 22                                                               | SLC25A22                            | 0,91 |
| chemokine (C-C motif) ligand 25                                                                                                      | CCL25                               | 0,91 |
| zinc finger with KRAB and SCAN domains 4                                                                                             | ZKSCAN4                             | 0,91 |
| family with sequence similarity 47, member E; FAM47E-STBD1 readthrough; starch binding domain 1                                      | FAM47E; FAM47E-STBD1; STBD1         | 0,91 |
| chromosome 4 open reading frame 19                                                                                                   | C4orf19                             | 0,91 |
| repulsive guidance molecule family member a                                                                                          | RGMA                                | 0,91 |
| transducin-like enhancer of split 6                                                                                                  | TLE6                                | 0,91 |
| major histocompatibility complex, class II, DO alpha                                                                                 | HLA-DOA                             | 0,91 |
| 5-hydroxytryptamine (serotonin) receptor 5A, G protein-coupled                                                                       | HTR5A                               | 0,91 |
| kelch repeat and BTB (POZ) domain containing 11                                                                                      | KBTBD11                             | 0,91 |
| uncharacterized LOC101928034; Salzman2013 ANTISENSE, CDS, coding, INTERNAL, intronic, OVCODE, OVEXON, UTR5 best transcript NM_002960 | LOC101928034; S100A3                | 0,91 |
| chromosome 9 open reading frame 153                                                                                                  | C9orf153                            | 0,91 |
| cytochrome b5 reductase-like                                                                                                         | CYB5RL                              | 0,91 |
| protein phosphatase 2, regulatory subunit A, beta                                                                                    | PPP2R1B                             | 0,91 |
| chromosome 1 open reading frame 61                                                                                                   | C1orf61                             | 0,91 |
| methyltransferase like 12; small nucleolar RNA, H/ACA box 57                                                                         | METTL12; SNORA57                    | 0,91 |
| stathmin-like 3                                                                                                                      | STMN3                               | 0,91 |
| otopetrin 3                                                                                                                          | OTOP3                               | 0,91 |
| Jrk helix-turn-helix protein                                                                                                         | JRK                                 | 0,91 |
| Memczak2013 ALT_ACCEPTOR, ALT_DONOR, coding, INTERNAL, intronic best transcript NM_018482                                            | ASAP1                               | 0,91 |
| CDC42 small effector 2                                                                                                               | CDC42SE2                            | 0,91 |
| uncharacterized 100631378; Transcript Identified by AceView, Entrez Gene ID(s) 728853; novel transcript                              | LOC100631378; AC016582.2; LOC728853 | 0,91 |
| hydroxymethylbilane synthase                                                                                                         | HMBS                                | 0,91 |

|                                                                                        |                         |      |
|----------------------------------------------------------------------------------------|-------------------------|------|
| PAS domain containing serine/threonine kinase                                          | PASK                    | 0,91 |
| uncharacterized LOC283731; novel transcript                                            | LOC283731; RP11-247C2.2 | 0,91 |
| LDL receptor related protein 5 like                                                    | LRP5L                   | 0,91 |
| GTPase, IMAP family member 6                                                           | GIMAP6                  | 0,91 |
| teashirt zinc finger homeobox 1                                                        | TSHZ1                   | 0,91 |
| phosphatidylinositol transfer protein, membrane-associated 1                           | PITPNM1                 | 0,91 |
| formin binding protein 4                                                               | FNBP4                   | 0,91 |
| carbonic anhydrase VI                                                                  | CA6                     | 0,91 |
| chromosome 7 open reading frame 76; split hand/foot malformation (ectrodactyly) type 1 | C7orf76; SHFM1          | 0,91 |
| microtubule associated protein 6                                                       | MAP6                    | 0,91 |
| zinc finger protein 789                                                                | ZNF789                  | 0,91 |
| carcinoembryonic antigen-related cell adhesion molecule 21                             | CEACAM21                | 0,91 |
| perilipin 5                                                                            | PLIN5                   | 0,91 |
| PR domain containing 10                                                                | PRDM10                  | 0,91 |
| olfactory receptor, family 11, subfamily A, member 1                                   | OR11A1                  | 0,91 |
| high mobility group box 1                                                              | HMGB1                   | 0,91 |
| interleukin 10 receptor, beta                                                          | IL10RB                  | 0,91 |
| solute carrier family 25 (mitochondrial carrier; ornithine transporter) member 2       | SLC25A2                 | 0,91 |
| keratin associated protein 10-9                                                        | KRTAP10-9               | 0,91 |
| heterogeneous nuclear ribonucleoprotein C-like 1                                       | HNRNPCL1                | 0,91 |
| mitochondrial ribosomal protein L38                                                    | MRPL38                  | 0,91 |
| SET nuclear proto-oncogene                                                             | SET                     | 0,91 |
| APC membrane recruitment protein 2                                                     | AMER2                   | 0,91 |
| potassium channel, voltage gated shaker related subfamily A, member 1                  | KCNA1                   | 0,91 |
| major histocompatibility complex, class I, F                                           | HLA-F                   | 0,91 |
| olfactory receptor, family 9, subfamily I, member 1                                    | OR9I1                   | 0,91 |
| integrin beta like 1                                                                   | ITGBL1                  | 0,91 |
| F-box protein 36                                                                       | FBXO36                  | 0,91 |
| growth differentiation factor 2                                                        | GDF2                    | 0,91 |
| NFKB activating protein                                                                | NKAP                    | 0,91 |
| F-box and WD repeat domain containing 12                                               | FBXW12                  | 0,91 |
| ADAM metallopeptidase domain 12                                                        | ADAM12                  | 0,91 |
| retina and anterior neural fold homeobox                                               | RAX                     | 0,91 |
| dihydrofolate reductase like 1                                                         | DHFRL1                  | 0,91 |
| nuclear factor, erythroid 2-like 1                                                     | NFE2L1                  | 0,91 |
| synaptotagmin III                                                                      | SYT3                    | 0,91 |
| tudor and KH domain containing                                                         | TDRKH                   | 0,91 |
| solute carrier family 6 (neutral amino acid transporter), member 19                    | SLC6A19                 | 0,91 |

|                                                                                         |           |      |
|-----------------------------------------------------------------------------------------|-----------|------|
| killer cell lectin-like receptor subfamily A pseudogene 1                               | KLRAP1    | 0,91 |
| ras responsive element binding protein 1                                                | RREB1     | 0,91 |
| SUMO1/sentrin specific peptidase 5                                                      | SENP5     | 0,91 |
| chromosome 4 open reading frame 51                                                      | C4orf51   | 0,91 |
| motile sperm domain containing 3                                                        | MOSPD3    | 0,91 |
| CUGBP, Elav-like family member 1                                                        | CELF1     | 0,91 |
| long intergenic non-protein coding RNA 1496                                             | LINC01496 | 0,91 |
| oligodendrocyte myelin glycoprotein                                                     | OMG       | 0,91 |
| ras homolog family member V                                                             | RHOV      | 0,91 |
| transcription factor 25 (basic helix-loop-helix)                                        | TCF25     | 0,91 |
| Transcript Identified by AceView, Entrez Gene ID(s)<br>143686                           | SESN3     | 0,91 |
| cytochrome P450, family 26, subfamily B, polypeptide 1                                  | CYP26B1   | 0,91 |
| taxilin alpha                                                                           | TXLNA     | 0,91 |
| chromosome X open reading frame 40B                                                     | CXorf40B  | 0,91 |
| cathepsin Z                                                                             | CTSZ      | 0,91 |
| C-type lectin domain family 10, member A                                                | CLEC10A   | 0,91 |
| StAR-related lipid transfer domain containing 5                                         | STARD5    | 0,91 |
| heterogeneous nuclear ribonucleoprotein C-like 4<br>[Source:HGNC Symbol;Acc:HGNC:51333] | HNRNPCL4  | 0,91 |
| iron-sulfur cluster assembly 2                                                          | ISCA2     | 0,91 |
| chromosome 1 open reading frame 159                                                     | C1orf159  | 0,91 |
| trophinin associated protein                                                            | TROAP     | 0,91 |
| succinyl-CoA:glutarate-CoA transferase                                                  | SUGCT     | 0,91 |
| poly(A)-specific ribonuclease (PARN)-like domain<br>containing 1                        | PNLDC1    | 0,91 |
| dual oxidase maturation factor 2                                                        | DUOXA2    | 0,91 |
| forkhead box I2                                                                         | FOXI2     | 0,91 |
| mitogen-activated protein kinase 7                                                      | MAPK7     | 0,91 |
| NHS-like 2                                                                              | NHSL2     | 0,91 |
| coiled-coil domain containing 137                                                       | CCDC137   | 0,91 |
| family with sequence similarity 109, member A                                           | FAM109A   | 0,91 |
| proprotein convertase subtilisin/kexin type 1 inhibitor                                 | PCSK1N    | 0,91 |
| calcium-sensing receptor                                                                | CASR      | 0,91 |
| ES cell expressed Ras                                                                   | ERAS      | 0,91 |
| endothelin receptor type B                                                              | EDNRB     | 0,91 |
| NADH dehydrogenase (ubiquinone) 1 alpha subcomplex,<br>10, 42kDa                        | NDUFA10   | 0,91 |
| chromosome 22 open reading frame 42                                                     | C22orf42  | 0,91 |
| mitochondrial ribosomal protein L28                                                     | MRPL28    | 0,91 |
| guanine nucleotide binding protein (G protein), q<br>polypeptide                        | GNAQ      | 0,91 |
| ubiquinol-cytochrome c reductase hinge protein                                          | UQCRH     | 0,91 |
| dual specificity phosphatase 26 (putative)                                              | DUSP26    | 0,91 |
| cytochrome P450, family 2, subfamily C, polypeptide 9                                   | CYP2C9    | 0,91 |

|                                                                                                |                |      |
|------------------------------------------------------------------------------------------------|----------------|------|
| ubiquinol-cytochrome c reductase complex assembly factor 1                                     | UQCC1          | 0,91 |
| centromere protein B                                                                           | CENPB          | 0,91 |
| erb-b2 receptor tyrosine kinase 4                                                              | ERBB4          | 0,91 |
| relaxin/insulin-like family peptide receptor 3                                                 | RXFP3          | 0,91 |
| forkhead box D4                                                                                | FOXD4          | 0,91 |
| olfactory receptor, family 4, subfamily N, member 2                                            | OR4N2          | 0,91 |
| zinc finger protein 280D                                                                       | ZNF280D        | 0,91 |
| lysozyme-like 6                                                                                | LYZL6          | 0,91 |
| signal sequence receptor, beta (translocon-associated protein beta)                            | SSR2           | 0,91 |
| anthrax toxin receptor-like                                                                    | ANTXRL         | 0,91 |
| N-acetyltransferase 8 (GCN5-related, putative)                                                 | NAT8           | 0,91 |
| glycoprotein Ib (platelet), alpha polypeptide                                                  | GP1BA          | 0,91 |
| Transcript Identified by AceView, Entrez Gene ID(s) 2098                                       | ESD            | 0,91 |
| methionine sulfoxide reductase A                                                               | MSRA           | 0,91 |
| coiled-coil domain containing 178                                                              | CCDC178        | 0,91 |
| lymphocyte antigen 6 complex, locus G6F                                                        | LY6G6F         | 0,91 |
| HLA complex group 27 (non-protein coding)                                                      | HCG27          | 0,91 |
| SWI/SNF related, matrix associated, actin dependent regulator of chromatin, subfamily a-like 1 | SMARCA1        | 0,91 |
| nuclear receptor subfamily 2, group E, member 3                                                | NR2E3          | 0,91 |
| diacylglycerol O-acyltransferase 2                                                             | DGAT2          | 0,91 |
| keratin associated protein 19-7                                                                | KRTAP19-7      | 0,91 |
| methyltransferase like 20                                                                      | METTL20        | 0,91 |
| replication protein A2                                                                         | RPA2           | 0,91 |
| olfactory receptor, family 4, subfamily C, member 3                                            | OR4C3          | 0,91 |
| pyroglutamylated RFamide peptide receptor                                                      | QRFPR          | 0,91 |
| docking protein 3                                                                              | DOK3           | 0,91 |
| ubiquitin specific peptidase 10                                                                | USP10          | 0,91 |
| pannexin 3                                                                                     | PANX3          | 0,91 |
| adrenoceptor alpha 2B                                                                          | ADRA2B         | 0,91 |
| ribosomal L24 domain containing 1                                                              | RSL24D1        | 0,91 |
| S-antigen; retina and pineal gland (arrestin)                                                  | SAG            | 0,91 |
| cytochrome c oxidase subunit Va                                                                | COX5A          | 0,91 |
| regulator of G-protein signaling like 1                                                        | RGSL1          | 0,91 |
| O-6-methylguanine-DNA methyltransferase                                                        | MGMT           | 0,91 |
| membrane-spanning 4-domains, subfamily A, member 2                                             | MS4A2          | 0,91 |
| outer dense fiber of sperm tails 4                                                             | ODF4           | 0,91 |
| phospholipase C-like 2; microRNA 3714                                                          | PLCL2; MIR3714 | 0,91 |
| NOP2/Sun domain family, member 3                                                               | NSUN3          | 0,91 |
| apolipoprotein B mRNA editing enzyme, catalytic polypeptide-like 3D                            | APOBEC3D       | 0,91 |

|                                                                                                                                                                                                                                                                                                                                                                                                                                                                                                                                                      |                           |      |
|------------------------------------------------------------------------------------------------------------------------------------------------------------------------------------------------------------------------------------------------------------------------------------------------------------------------------------------------------------------------------------------------------------------------------------------------------------------------------------------------------------------------------------------------------|---------------------------|------|
| synaptosome associated protein 47kDa                                                                                                                                                                                                                                                                                                                                                                                                                                                                                                                 | SNAP47                    | 0,91 |
| reprimin, TP53 dependent G2 arrest mediator candidate                                                                                                                                                                                                                                                                                                                                                                                                                                                                                                | RPRM                      | 0,91 |
| family with sequence similarity 83, member E                                                                                                                                                                                                                                                                                                                                                                                                                                                                                                         | FAM83E                    | 0,91 |
| NADH dehydrogenase (ubiquinone) 1 beta subcomplex, 7, 18kDa                                                                                                                                                                                                                                                                                                                                                                                                                                                                                          | NDUFB7                    | 0,91 |
| 5-hydroxytryptamine (serotonin) receptor 2C, G protein-coupled                                                                                                                                                                                                                                                                                                                                                                                                                                                                                       | HTR2C                     | 0,91 |
| Homo sapiens POTE ankyrin domain family, member B3 (POTEB3), transcript variant 1, mRNA.; Homo sapiens POTE ankyrin domain family, member B, mRNA (cDNA clone MGC:119371 IMAGE:40006483), complete cds.; Homo sapiens POTE ankyrin domain family, member B, mRNA (cDNA clone MGC:119372 IMAGE:40006485), complete cds.; Homo sapiens POTE ankyrin domain family, member B, mRNA (cDNA clone MGC:119373 IMAGE:40006489), complete cds.; Homo sapiens POTE ankyrin domain family, member B, mRNA (cDNA clone MGC:156116 IMAGE:40006490), complete cds. | POTEB3; POTEB; AC136352.4 | 0,91 |
| ubiquitin specific peptidase 26                                                                                                                                                                                                                                                                                                                                                                                                                                                                                                                      | USP26                     | 0,91 |
| sushi domain containing 1                                                                                                                                                                                                                                                                                                                                                                                                                                                                                                                            | SUSD1                     | 0,91 |
| RAB40A, member RAS oncogene family-like                                                                                                                                                                                                                                                                                                                                                                                                                                                                                                              | RAB40AL                   | 0,91 |
| olfactory receptor, family 4, subfamily E, member 2                                                                                                                                                                                                                                                                                                                                                                                                                                                                                                  | OR4E2                     | 0,91 |
| sulfatase 1                                                                                                                                                                                                                                                                                                                                                                                                                                                                                                                                          | SULF1                     | 0,91 |
| DnaJ (Hsp40) homolog, subfamily C, member 7                                                                                                                                                                                                                                                                                                                                                                                                                                                                                                          | DNAJC7                    | 0,91 |
| KIF1 binding protein                                                                                                                                                                                                                                                                                                                                                                                                                                                                                                                                 | KIF1BP                    | 0,91 |
| phospholipase C, epsilon 1                                                                                                                                                                                                                                                                                                                                                                                                                                                                                                                           | PLCE1                     | 0,91 |
| protein disulfide isomerase family A, member 2                                                                                                                                                                                                                                                                                                                                                                                                                                                                                                       | PDIA2                     | 0,91 |
| Memczak2013 ALT_ACCEPTOR, ALT_DONOR, coding, INTERNAL, intronic best transcript NM_022480                                                                                                                                                                                                                                                                                                                                                                                                                                                            | KLHL25                    | 0,91 |
| SAM domain and HD domain 1                                                                                                                                                                                                                                                                                                                                                                                                                                                                                                                           | SAMHD1                    | 0,91 |
| transcription factor B2, mitochondrial                                                                                                                                                                                                                                                                                                                                                                                                                                                                                                               | TFB2M                     | 0,91 |
| olfactory receptor, family 5, subfamily AP, member 2                                                                                                                                                                                                                                                                                                                                                                                                                                                                                                 | OR5AP2                    | 0,91 |
| Memczak2013 ANTISENSE, coding, INTERNAL, UTR3 best transcript NM_000565                                                                                                                                                                                                                                                                                                                                                                                                                                                                              | IL6R                      | 0,91 |
| nodal growth differentiation factor                                                                                                                                                                                                                                                                                                                                                                                                                                                                                                                  | NODAL                     | 0,91 |
| retinitis pigmentosa 9 (autosomal dominant)                                                                                                                                                                                                                                                                                                                                                                                                                                                                                                          | RP9                       | 0,91 |
| heat shock 70kD protein 12B                                                                                                                                                                                                                                                                                                                                                                                                                                                                                                                          | HSPA12B                   | 0,91 |
| makorin ring finger protein 2                                                                                                                                                                                                                                                                                                                                                                                                                                                                                                                        | MKRN2                     | 0,91 |
| tripartite motif containing 26                                                                                                                                                                                                                                                                                                                                                                                                                                                                                                                       | TRIM26                    | 0,91 |
| golgi reassembly stacking protein 2                                                                                                                                                                                                                                                                                                                                                                                                                                                                                                                  | GORASP2                   | 0,91 |
| odorant binding protein 2B                                                                                                                                                                                                                                                                                                                                                                                                                                                                                                                           | OBP2B                     | 0,91 |
| ubiquinol-cytochrome c reductase core protein II                                                                                                                                                                                                                                                                                                                                                                                                                                                                                                     | UQCRC2                    | 0,91 |
| salt-inducible kinase 1                                                                                                                                                                                                                                                                                                                                                                                                                                                                                                                              | SIK1                      | 0,91 |
| transmembrane protein 100                                                                                                                                                                                                                                                                                                                                                                                                                                                                                                                            | TMEM100                   | 0,91 |
| stathmin 2                                                                                                                                                                                                                                                                                                                                                                                                                                                                                                                                           | STMN2                     | 0,91 |

|                                                                                                           |                       |      |
|-----------------------------------------------------------------------------------------------------------|-----------------------|------|
| family with sequence similarity 163, member A                                                             | FAM163A               | 0,91 |
| prostaglandin-endoperoxide synthase 1 (prostaglandin G/H synthase and cyclooxygenase)                     | PTGS1                 | 0,91 |
| ubiquitin-like 4B                                                                                         | UBL4B                 | 0,91 |
| cortexin 3                                                                                                | CTXN3                 | 0,91 |
| hydroxysteroid (17-beta) dehydrogenase 3                                                                  | HSD17B3               | 0,91 |
| Transcript Identified by AceView, Entrez Gene ID(s) 23081                                                 | KDM4C                 | 0,91 |
| ATP11A upstream neighbor                                                                                  | ATP11AUN              | 0,91 |
| pancreatic lipase                                                                                         | PNLIP                 | 0,91 |
| cat eye syndrome chromosome region, candidate 2                                                           | CECR2                 | 0,91 |
| kelch domain containing 9                                                                                 | KLHDC9                | 0,91 |
| Rhox homeobox family, member 2B; Rhox homeobox family, member 2                                           | RHOXF2B;<br>RHOXF2    | 0,91 |
| haloacid dehalogenase-like hydrolase domain containing 2                                                  | HDHD2                 | 0,91 |
| thyroid hormone receptor associated protein 3                                                             | THRAP3                | 0,90 |
| Rho guanine nucleotide exchange factor 37                                                                 | ARHGEF37              | 0,90 |
| lipocalin 1                                                                                               | LCN1                  | 0,90 |
| dual adaptor of phosphotyrosine and 3-phosphoinositides                                                   | DAPP1                 | 0,90 |
| potassium channel, voltage gated modifier subfamily F, member 1                                           | KCNF1                 | 0,90 |
| keratin associated protein 29-1                                                                           | KRTAP29-1             | 0,90 |
| leucine rich repeat containing 17                                                                         | LRRC17                | 0,90 |
| HGH1 homolog                                                                                              | HGH1                  | 0,90 |
| fructosamine 3 kinase related protein                                                                     | FN3KRP                | 0,90 |
| chloride channel accessory 1                                                                              | CLCA1                 | 0,90 |
| ELKS/RAB6-interacting/CAST family member 2                                                                | ERC2                  | 0,90 |
| tyrosylprotein sulfotransferase 2                                                                         | TPST2                 | 0,90 |
| chromosome 3 open reading frame 17                                                                        | C3orf17               | 0,90 |
| solute carrier family 25 (carnitine/acylcarnitine translocase), member 20                                 | SLC25A20              | 0,90 |
| NME/NM23 nucleoside diphosphate kinase 1; NME1-NME2 readthrough; NME/NM23 nucleoside diphosphate kinase 2 | NME1; NME1-NME2; NME2 | 0,90 |
| zinc finger protein 419                                                                                   | ZNF419                | 0,90 |
| chromosome 12 open reading frame 66                                                                       | C12orf66              | 0,90 |
| protein phosphatase 1, regulatory subunit 12C                                                             | PPP1R12C              | 0,90 |
| olfactory receptor, family 4, subfamily K, member 2                                                       | OR4K2                 | 0,90 |
| olfactory receptor, family 7, subfamily C, member 2                                                       | OR7C2                 | 0,90 |
| amyloid beta precursor protein (cytoplasmic tail) binding protein 2                                       | APPBP2                | 0,90 |
| MAP-kinase activating death domain                                                                        | MADD                  | 0,90 |
| ariadne homolog 2 opposite strand                                                                         | ARIH2OS               | 0,90 |

|                                                                                   |                                |      |
|-----------------------------------------------------------------------------------|--------------------------------|------|
| diacylglycerol kinase, delta 130kDa                                               | DGKD                           | 0,90 |
| COP9 signalosome subunit 7A                                                       | COPS7A                         | 0,90 |
| dermcidin                                                                         | DCD                            | 0,90 |
| lysophosphatidic acid receptor 4                                                  | LPAR4                          | 0,90 |
| secretoglobin, family 1C, member 1                                                | SCGB1C1                        | 0,90 |
| U2 small nuclear RNA auxiliary factor 1                                           | U2AF1                          | 0,90 |
| RPL36A-HNRNPH2 readthrough                                                        | RPL36A-HNRNPH2                 | 0,90 |
| mitochondrial ribosomal protein S12                                               | MRPS12                         | 0,90 |
| dopamine receptor D3                                                              | DRD3                           | 0,90 |
| olfactory receptor, family 2, subfamily L, member 8 (gene/pseudogene)             | OR2L8                          | 0,90 |
| Fc fragment of IgG, low affinity IIb, receptor (CD32)                             | FCGR2B                         | 0,90 |
| cytochrome b5 type B (outer mitochondrial membrane)                               | CYB5B                          | 0,90 |
| tubulin folding cofactor C                                                        | TBCC                           | 0,90 |
| phosducin like                                                                    | PDCL                           | 0,90 |
| long intergenic non-protein coding RNA 649                                        | LINC00649                      | 0,90 |
| tripartite motif containing 49B                                                   | TRIM49B                        | 0,90 |
| translocase of inner mitochondrial membrane 8 homolog B (yeast)                   | TIMM8B                         | 0,90 |
| synovial sarcoma translocation gene on chromosome 18-like 2                       | SS18L2                         | 0,90 |
| ribosomal protein S6 kinase-like 1                                                | RPS6KL1                        | 0,90 |
| low density lipoprotein receptor class A domain containing 1                      | LDLRAD1                        | 0,90 |
| trinucleotide repeat containing 18                                                | TNRC18                         | 0,90 |
| FCH domain only 1                                                                 | FCHO1                          | 0,90 |
| small nuclear ribonucleoprotein, U5 200kDa subunit                                | SNRNP200                       | 0,90 |
| RAB32, member RAS oncogene family                                                 | RAB32                          | 0,90 |
| CD300 molecule-like family member g                                               | CD300LG                        | 0,90 |
| ST8 alpha-N-acetyl-neuraminide alpha-2,8-sialyltransferase 1                      | ST8SIA1                        | 0,90 |
| uncharacterized LOC100134391; novel transcript                                    | LOC100134391;<br>CTD-2532D12.4 | 0,90 |
| FERM domain containing 6                                                          | FRMD6                          | 0,90 |
| chromosome 9 open reading frame 135                                               | C9orf135                       | 0,90 |
| EF-hand domain family, member B                                                   | EFHB                           | 0,90 |
| solute carrier family 22, member 24                                               | SLC22A24                       | 0,90 |
| zinc finger protein 625                                                           | ZNF625                         | 0,90 |
| DPY30 domain containing 1                                                         | DYDC1                          | 0,90 |
| MARCKS-like 1                                                                     | MARCKSL1                       | 0,90 |
| solute carrier family 25 (mitochondrial carrier; oxoglutarate carrier), member 11 | SLC25A11                       | 0,90 |
| sperm acrosome associated 6                                                       | SPACA6                         | 0,90 |
| myogenic differentiation 1                                                        | MYOD1                          | 0,90 |

|                                                                                           |          |      |
|-------------------------------------------------------------------------------------------|----------|------|
| cholecystokinin B receptor                                                                | CCKBR    | 0,90 |
| actin-related protein T2                                                                  | ACTRT2   | 0,90 |
| opsin 1 (cone pigments), long-wave-sensitive                                              | OPN1LW   | 0,90 |
| zinc finger protein 354B                                                                  | ZNF354B  | 0,90 |
| solute carrier family 16 (monocarboxylate transporter), member 1                          | SLC16A1  | 0,90 |
| von Willebrand factor D and EGF domains                                                   | VWDE     | 0,90 |
| paired box 2                                                                              | PAX2     | 0,90 |
| v-ets avian erythroblastosis virus E26 oncogene homolog                                   | ERG      | 0,90 |
| olfactory receptor, family 14, subfamily I, member 1                                      | OR14I1   | 0,90 |
| keratin associated protein 7-1 (gene/pseudogene)                                          | KRTAP7-1 | 0,90 |
| cadherin 22, type 2                                                                       | CDH22    | 0,90 |
| Memczak2013 ALT_ACCEPTOR, ALT_DONOR, coding, INTERNAL, intronic best transcript NM_004152 | OAZ1     | 0,90 |
| Rh family, C glycoprotein                                                                 | RHCG     | 0,90 |
| RNA polymerase II associated protein 2                                                    | RPAP2    | 0,90 |
| claudin 23                                                                                | CLDN23   | 0,90 |
| RIO kinase 2                                                                              | RIOK2    | 0,90 |
| TBC1 domain family, member 21                                                             | TBC1D21  | 0,90 |
| cyclin T2                                                                                 | CCNT2    | 0,90 |
| sorting nexin 12                                                                          | SNX12    | 0,90 |
| apolipoprotein L, 2                                                                       | APOL2    | 0,90 |
| family with sequence similarity 101, member A                                             | FAM101A  | 0,90 |
| olfactory receptor, family 52, subfamily Z, member 1 (gene/pseudogene)                    | OR52Z1   | 0,90 |
| keratin 3, type II                                                                        | KRT3     | 0,90 |
| parvin, gamma                                                                             | PARVG    | 0,90 |
| diacylglycerol kinase, iota                                                               | DGKI     | 0,90 |
| WD repeat domain 12                                                                       | WDR12    | 0,90 |
| PLAC8-like 1                                                                              | PLAC8L1  | 0,90 |
| WD repeat domain 36                                                                       | WDR36    | 0,90 |
| protein phosphatase, Mg2+/Mn2+ dependent, 1L                                              | PPM1L    | 0,90 |
| REC8 meiotic recombination protein                                                        | REC8     | 0,90 |
| selectin P (granule membrane protein 140kDa, antigen CD62)                                | SELP     | 0,90 |
| peripherin 2 (retinal degeneration, slow)                                                 | PRPH2    | 0,90 |
| myosin binding protein C, slow type                                                       | MYBPC1   | 0,90 |
| serine peptidase inhibitor, Kazal type 7 (putative)                                       | SPINK7   | 0,90 |
| G1 to S phase transition 2                                                                | GSPT2    | 0,90 |
| splicing factor, suppressor of white-apricot family                                       | SFSWAP   | 0,90 |
| G protein-coupled receptor 15                                                             | GPR15    | 0,90 |
| zinc finger, B-box domain containing                                                      | ZBBX     | 0,90 |
| bone morphogenetic protein 15                                                             | BMP15    | 0,90 |



|                                                                          |                    |      |
|--------------------------------------------------------------------------|--------------------|------|
| tripartite motif containing 63, E3 ubiquitin protein ligase              | TRIM63             | 0,90 |
| neuronal pentraxin II                                                    | NPTX2              | 0,90 |
| polymerase (RNA) II (DNA directed) polypeptide D                         | POLR2D             | 0,90 |
| lipase, member I                                                         | LIPI               | 0,90 |
| isoprenoid synthase domain containing                                    | ISPD               | 0,90 |
| Jeck2013 ALT_DONOR, coding, INTERNAL, intronic best transcript NM_147780 | CTSB               | 0,90 |
| olfactory receptor, family 4, subfamily C, member 13                     | OR4C13             | 0,90 |
| bifunctional apoptosis regulator                                         | BFAR               | 0,90 |
| heterogeneous nuclear ribonucleoprotein H1 (H)                           | HNRNPH1            | 0,90 |
| cytochrome P450, family 2, subfamily D, polypeptide 6                    | CYP2D6             | 0,90 |
| N-acetyltransferase 16 (GCN5-related, putative)                          | NAT16              | 0,90 |
| G protein-coupled receptor 78                                            | GPR78              | 0,90 |
| long intergenic non-protein coding RNA 1620                              | LINC01620          | 0,90 |
| zinc finger protein 431; vomeronasal 1 receptor 82 pseudogene            | ZNF431;<br>VN1R82P | 0,90 |
| superoxide dismutase 1, soluble                                          | SOD1               | 0,90 |
| Rho guanine nucleotide exchange factor 16                                | ARHGEF16           | 0,90 |
| Fanconi anemia complementation group E                                   | FANCE              | 0,90 |
| Transcript Identified by AceView, Entrez Gene ID(s) 51633                | OTUD6B             | 0,90 |
| chemokine (C-C motif) receptor 3                                         | CCR3               | 0,90 |
| coiled-coil domain containing 7                                          | CCDC7              | 0,90 |
| cytochrome c oxidase subunit VIIb                                        | COX7B              | 0,90 |
| transient receptor potential cation channel, subfamily V, member 6       | TRPV6              | 0,90 |
| protein tyrosine phosphatase, receptor type, H                           | PTPRH              | 0,90 |
| small integral membrane protein 22                                       | SMIM22             | 0,90 |
| tumor necrosis factor, alpha-induced protein 8-like 3                    | TNFAIP8L3          | 0,90 |
| atonal bHLH transcription factor 1                                       | ATOH1              | 0,90 |
| receptor-associated protein of the synapse                               | RAPSN              | 0,90 |
| phosphodiesterase 1A, calmodulin-dependent                               | PDE1A              | 0,90 |
| solute carrier family 35, member E2                                      | SLC35E2            | 0,90 |
| heparan sulfate 6-O-sulfotransferase 3                                   | HS6ST3             | 0,90 |
| ornithine decarboxylase antizyme 3                                       | OAZ3               | 0,90 |
| abhydrolase domain containing 15                                         | ABHD15             | 0,90 |
| olfactory receptor, family 4, subfamily K, member 15                     | OR4K15             | 0,90 |
| circadian associated repressor of transcription                          | CIART              | 0,90 |
| KIAA0232                                                                 | KIAA0232           | 0,90 |
| ring finger protein 212B                                                 | RNF212B            | 0,90 |
| interferon, kappa                                                        | IFNK               | 0,90 |
| tudor domain containing 15                                               | TDRD15             | 0,90 |
| ankyrin repeat domain 63                                                 | ANKRD63            | 0,90 |
| arginine vasopressin receptor 1A                                         | AVPR1A             | 0,90 |

|                                                                                   |          |      |
|-----------------------------------------------------------------------------------|----------|------|
| chromosome X open reading frame 49B                                               | CXorf49B | 0,90 |
| F-box protein 27                                                                  | FBXO27   | 0,90 |
| acetylcholinesterase (Yt blood group)                                             | ACHE     | 0,90 |
| Memczak2013 ANTISENSE, coding, INTERNAL, intronic<br>best transcript NM_001198696 | AIFM2    | 0,90 |
| crumbs family member 2                                                            | CRB2     | 0,90 |
| histamine receptor H3                                                             | HRH3     | 0,90 |
| solute carrier family 31 (copper transporter), member 2                           | SLC31A2  | 0,90 |
| collectin sub-family member 12                                                    | COLEC12  | 0,90 |
| Memczak2013 ANTISENSE, coding, INTERNAL, intronic<br>best transcript NM_020235    | BBX      | 0,90 |
| equatorin, sperm acrosome associated                                              | EQTN     | 0,90 |
| opsin 1 (cone pigments), medium-wave-sensitive                                    | OPN1MW   | 0,90 |
| dynein, axonemal, heavy chain 3                                                   | DNAH3    | 0,90 |
| coiled-coil domain containing 130                                                 | CCDC130  | 0,90 |
| nucleotide binding protein 1                                                      | NUBP1    | 0,90 |
| ABI family, member 3                                                              | ABI3     | 0,90 |
| leucine zipper, down-regulated in cancer 1-like                                   | LDOC1L   | 0,90 |
| gamma-aminobutyric acid (GABA) A receptor, alpha 3                                | GABRA3   | 0,90 |
| dopamine receptor D4                                                              | DRD4     | 0,90 |
| Transcript Identified by AceView, Entrez Gene ID(s) 79844                         | ZDHC11   | 0,90 |
| MIS18 kinetochore protein A                                                       | MIS18A   | 0,90 |
| solute carrier family 35, member D3                                               | SLC35D3  | 0,90 |
| taste receptor, type 2, member 3                                                  | TAS2R3   | 0,90 |
| podocan                                                                           | PODN     | 0,90 |
| chemokine (C-C motif) receptor 9                                                  | CCR9     | 0,90 |
| mitochondrial transcription termination factor 3                                  | MTERF3   | 0,90 |
| YME1-like 1 ATPase                                                                | YME1L1   | 0,90 |
| septin 14                                                                         | sept-14  | 0,90 |
| v-maf avian musculoaponeurotic fibrosarcoma oncogene<br>homolog A                 | MAFA     | 0,90 |
| tripartite motif containing 58                                                    | TRIM58   | 0,90 |
| calcium homeostasis modulator 3                                                   | CALHM3   | 0,90 |
| mab-21-like 1 (C. elegans)                                                        | MAB21L1  | 0,90 |
| chromosome 11 open reading frame 96                                               | C11orf96 | 0,90 |
| olfactory receptor, family 52, subfamily K, member 1                              | OR52K1   | 0,90 |
| NK2 homeobox 6                                                                    | NKX2-6   | 0,90 |
| opioid receptor, mu 1                                                             | OPRM1    | 0,90 |
| cadherin 4, type 1, R-cadherin (retinal)                                          | CDH4     | 0,90 |
| forkhead box D4-like 5                                                            | FOXD4L5  | 0,90 |
| deiodinase, iodothyronine, type II                                                | DIO2     | 0,90 |
| cyclin-dependent kinase inhibitor 2D (p19, inhibits CDK4)                         | CDKN2D   | 0,90 |
| solute carrier family 35, member G5                                               | SLC35G5  | 0,90 |

|                                                                                                         |                |      |
|---------------------------------------------------------------------------------------------------------|----------------|------|
| E1A binding protein p300; microRNA 1281                                                                 | EP300; MIR1281 | 0,90 |
| autophagy related 4C, cysteine peptidase                                                                | ATG4C          | 0,90 |
| BLK proto-oncogene, Src family tyrosine kinase                                                          | BLK            | 0,90 |
| chemokine (C-X-C motif) ligand 13                                                                       | CXCL13         | 0,90 |
| mitochondrial ribosomal protein S22                                                                     | MRPS22         | 0,90 |
| ectonucleotide pyrophosphatase/phosphodiesterase 4 (putative)                                           | ENPP4          | 0,90 |
| achaete-scute family bHLH transcription factor 1                                                        | ASCL1          | 0,90 |
| kyphoscoliosis peptidase                                                                                | KY             | 0,90 |
| Jeck2013 ALT_ACCEPTOR, ALT_DONOR, coding, INTERNAL, intronic best transcript NM_006909                  | RASGRF2        | 0,90 |
| CD69 molecule                                                                                           | CD69           | 0,90 |
| TBC1 domain family, member 23                                                                           | TBC1D23        | 0,90 |
| calcium channel, voltage-dependent, alpha 2/delta subunit 2                                             | CACNA2D2       | 0,90 |
| ArfGAP with GTPase domain, ankyrin repeat and PH domain 9; BMS1 ribosome biogenesis factor pseudogene 6 | AGAP9; BMS1P6  | 0,90 |
| solute carrier family 1 (neuronal/epithelial high affinity glutamate transporter, system Xag), member 1 | SLC1A1         | 0,90 |
| hypocretin (orexin) neuropeptide precursor                                                              | HCRT           | 0,90 |
| cytoplasmic linker associated protein 1                                                                 | CLASP1         | 0,90 |
| trichohyalin                                                                                            | TCHH           | 0,90 |
| MCF.2 cell line derived transforming sequence                                                           | MCF2           | 0,90 |
| forkhead box D2                                                                                         | FOXD2          | 0,90 |
| BIN3 intronic transcript 1                                                                              | BIN3-IT1       | 0,90 |
| kinocilin                                                                                               | KNCN           | 0,90 |
| Transcript Identified by AceView, Entrez Gene ID(s) 79719                                               | AAGAB          | 0,90 |
| acyl-CoA thioesterase 11                                                                                | ACOT11         | 0,90 |
| transmembrane protein 88B                                                                               | TMEM88B        | 0,90 |
| odorant binding protein 2B                                                                              | OBP2B          | 0,90 |
| small G protein signaling modulator 2                                                                   | SGSM2          | 0,90 |
| keratin associated protein 24-1                                                                         | KRTAP24-1      | 0,90 |
| Memczak2013 ALT_ACCEPTOR, ALT_DONOR, coding, INTERNAL, intronic best transcript NM_006586               | CNPY3          | 0,90 |
| elongator acetyltransferase complex subunit 3                                                           | ELP3           | 0,90 |
| Memczak2013 ANTISENSE, coding, INTERNAL, UTR3 best transcript NM_006378                                 | SEMA4D         | 0,90 |
| collagen, type X, alpha 1                                                                               | COL10A1        | 0,90 |
| ERI1 exoribonuclease family member 3; ERI3 intronic transcript 1                                        | ERI3; ERI3-IT1 | 0,90 |
| polymerase (RNA) III (DNA directed) polypeptide H (22.9kD)                                              | POLR3H         | 0,90 |
| kinesin family member 4B                                                                                | KIF4B          | 0,90 |

|                                                                                    |                     |      |
|------------------------------------------------------------------------------------|---------------------|------|
| cell adhesion molecule L1-like                                                     | CHL1                | 0,90 |
| alcohol dehydrogenase 7 (class IV), mu or sigma polypeptide                        | ADH7                | 0,90 |
| Ca <sup>++</sup> -dependent secretion activator                                    | CADPS               | 0,90 |
| RAB12, member RAS oncogene family                                                  | RAB12               | 0,90 |
| membrane-spanning 4-domains, subfamily A, member 18                                | MS4A18              | 0,90 |
| zinc finger protein 527                                                            | ZNF527              | 0,90 |
| tetratricopeptide repeat domain 30B                                                | TTC30B              | 0,90 |
| proteasome 26S subunit, ATPase 4 [Source:HGNC Symbol;Acc:HGNC:9551]                | PSMC4               | 0,90 |
| golgi brefeldin A resistant guanine nucleotide exchange factor 1                   | GBF1                | 0,90 |
| sulfotransferase family 1A member 2                                                | SULT1A2             | 0,90 |
| insulin; INS-IGF2 readthrough                                                      | INS; INS-IGF2       | 0,90 |
| leucine rich repeat containing 47                                                  | LRRC47              | 0,90 |
| synaptotagmin IX                                                                   | SYT9                | 0,90 |
| transmembrane protein 150A                                                         | TMEM150A            | 0,90 |
| transmembrane protein 200B                                                         | TMEM200B            | 0,90 |
| testis expressed 30                                                                | TEX30               | 0,90 |
| EGF-like-domain, multiple 6                                                        | EGFL6               | 0,90 |
| egl-9 family hypoxia-inducible factor 3                                            | EGLN3               | 0,90 |
| chromosome 1 open reading frame 168                                                | C1orf168            | 0,90 |
| insulin like growth factor binding protein-like 1                                  | IGFBPL1             | 0,90 |
| zinc finger protein 521                                                            | ZNF521              | 0,90 |
| protein-L-isoaspartate (D-aspartate) O-methyltransferase domain containing 1       | PCMTD1              | 0,90 |
| TBC1 domain family, member 17; microRNA 4750                                       | TBC1D17;<br>MIR4750 | 0,90 |
| frequently rearranged in advanced T-cell lymphomas 2                               | FRAT2               | 0,90 |
| ubiquitin-like modifier activating enzyme 6                                        | UBA6                | 0,90 |
| meiotic double-stranded break formation protein 4                                  | MEI4                | 0,90 |
| dynein regulatory complex subunit 7                                                | DRC7                | 0,90 |
| pepsinogen 4, group I (pepsinogen A)                                               | PGA4                | 0,90 |
| complement component (3d/Epstein Barr virus) receptor 2                            | CR2                 | 0,90 |
| solute carrier family 45, member 4                                                 | SLC45A4             | 0,90 |
| F-box and leucine-rich repeat protein 15                                           | FBXL15              | 0,90 |
| zinc finger protein 524                                                            | ZNF524              | 0,90 |
| olfactory receptor, family 11, subfamily H, member 6                               | OR11H6              | 0,90 |
| RANBP2-like and GRIP domain containing 2; RANBP2-like and GRIP domain containing 1 | RGPD2; RGPD1        | 0,90 |
| opsin 1 (cone pigments), short-wave-sensitive                                      | OPN1SW              | 0,90 |
| C-type lectin domain family 4, member C                                            | CLEC4C              | 0,90 |
| prolactin releasing hormone receptor                                               | PRLHR               | 0,90 |

|                                                                            |           |      |
|----------------------------------------------------------------------------|-----------|------|
| jagged 2                                                                   | JAG2      | 0,90 |
| family with sequence similarity 19 (chemokine (C-C motif)-like), member A2 | FAM19A2   | 0,90 |
| family with sequence similarity 189, member A1                             | FAM189A1  | 0,90 |
| acyl-CoA thioesterase 6                                                    | ACOT6     | 0,90 |
| potassium channel, two pore domain subfamily K, member 13                  | KCNK13    | 0,90 |
| makorin ring finger protein 1                                              | MKRN1     | 0,90 |
| SET binding factor 1                                                       | SBF1      | 0,90 |
| kinesin family member 23                                                   | KIF23     | 0,90 |
| aspartate beta-hydroxylase domain containing 2                             | ASPHD2    | 0,90 |
| transmembrane protein 191C                                                 | TMEM191C  | 0,90 |
| protease, serine, 2 (trypsin 2)                                            | PRSS2     | 0,90 |
| adiponectin, C1Q and collagen domain containing                            | ADIPOQ    | 0,90 |
| proteasome subunit alpha 4                                                 | PSMA4     | 0,90 |
| major facilitator superfamily domain containing 4                          | MFSD4     | 0,90 |
| oxytocin/neurophysin I prepropeptide                                       | OXT       | 0,90 |
| K(lysine) acetyltransferase 6B                                             | KAT6B     | 0,90 |
| vesicle transport through interaction with t-SNAREs 1B                     | VTI1B     | 0,90 |
| Bruton agammaglobulinemia tyrosine kinase                                  | BTK       | 0,90 |
| long intergenic non-protein coding RNA 1359                                | LINC01359 | 0,90 |
| Mab-21 domain containing 2                                                 | MB21D2    | 0,90 |
| epsin 3                                                                    | EPN3      | 0,90 |
| small ubiquitin-like modifier 3                                            | SUMO3     | 0,90 |
| melanocortin 1 receptor (alpha melanocyte stimulating hormone receptor)    | MC1R      | 0,90 |
| kelch-like family member 6                                                 | KLHL6     | 0,90 |
| macrophage receptor with collagenous structure                             | MARCO     | 0,90 |
| dihydrouridine synthase 2                                                  | DUS2      | 0,90 |
| nucleophosmin/nucleoplasmin 2                                              | NPM2      | 0,90 |
| Transcript Identified by AceView, Entrez Gene ID(s) 375775                 | PNPLA7    | 0,90 |
| retinal degeneration 3                                                     | RD3       | 0,90 |
| transmembrane protein 247                                                  | TMEM247   | 0,90 |
| Transcript Identified by AceView, Entrez Gene ID(s) 54715                  | A2BP1     | 0,90 |
| ALX homeobox 4                                                             | ALX4      | 0,90 |
| ubiquitin associated and SH3 domain containing A                           | UBASH3A   | 0,90 |
| clathrin interactor 1                                                      | CLINT1    | 0,90 |
| intercellular adhesion molecule 4 (Landsteiner-Wiener blood group)         | ICAM4     | 0,90 |
| ubiquitin specific peptidase 49                                            | USP49     | 0,90 |
| CD84 molecule                                                              | CD84      | 0,90 |
| family with sequence similarity 157, member A                              | FAM157A   | 0,90 |
| DDB1 and CUL4 associated factor 8                                          | DCAF8     | 0,90 |

|                                                                                                                                                           |                                                         |      |
|-----------------------------------------------------------------------------------------------------------------------------------------------------------|---------------------------------------------------------|------|
| zinc finger protein 584                                                                                                                                   | ZNF584                                                  | 0,90 |
| ALG10B, alpha-1,2-glucosyltransferase                                                                                                                     | ALG10B                                                  | 0,90 |
| zinc finger protein 705D                                                                                                                                  | ZNF705D                                                 | 0,90 |
| DDB1 and CUL4 associated factor 12-like 1                                                                                                                 | DCAF12L1                                                | 0,90 |
| Transcript Identified by AceView, Entrez Gene ID(s) 7082                                                                                                  | TJP1                                                    | 0,90 |
| olfactory receptor, family 3, subfamily A, member 2                                                                                                       | OR3A2                                                   | 0,90 |
| Transcript Identified by AceView, Entrez Gene ID(s) 23028                                                                                                 | KDM1A                                                   | 0,90 |
| adenomatosis polyposis coli down-regulated 1-like                                                                                                         | APCDD1L                                                 | 0,90 |
| olfactory receptor, family 4, subfamily D, member 9                                                                                                       | OR4D9                                                   | 0,90 |
| Jeck2013 ANTISENSE, coding, INTERNAL, intronic best transcript NM_001130100                                                                               | KIFC3                                                   | 0,90 |
| ubiquitin-like 4A                                                                                                                                         | UBL4A                                                   | 0,90 |
| phosphoribosylformylglycinamide synthase                                                                                                                  | PFAS                                                    | 0,90 |
| amyloid beta (A4) precursor protein-binding, family A, member 2                                                                                           | APBA2                                                   | 0,90 |
| transducer of ERBB2, 2                                                                                                                                    | TOB2                                                    | 0,90 |
| cyclin-dependent kinase 12                                                                                                                                | CDK12                                                   | 0,90 |
| zinc finger protein 546                                                                                                                                   | ZNF546                                                  | 0,90 |
| DiGeorge syndrome critical region gene 5 (non-protein coding); DiGeorge syndrome critical region gene 9 (non-protein coding)                              | DGCR5; DGCR9                                            | 0,90 |
| Jeck2013 ANTISENSE, CDS, coding, INTERNAL, intronic, OVCODE, OVEXON best transcript NM_058175                                                             | COL6A2                                                  | 0,90 |
| RNA binding motif protein 26                                                                                                                              | RBM26                                                   | 0,90 |
| transmembrane protein 80                                                                                                                                  | TMEM80                                                  | 0,90 |
| stromal antigen 2                                                                                                                                         | STAG2                                                   | 0,90 |
| Memczak2013 ANTISENSE, CDS, coding, INTERNAL, UTR3 best transcript NM_001080533                                                                           | UNC119B                                                 | 0,90 |
| GRB2-related adaptor protein 2                                                                                                                            | GRAP2                                                   | 0,90 |
| zinc finger protein 446                                                                                                                                   | ZNF446                                                  | 0,90 |
| SUMO1/sentrin/SMT3 specific peptidase 2                                                                                                                   | SEN2                                                    | 0,90 |
| TGF-beta activated kinase 1/MAP3K7 binding protein 2                                                                                                      | TAB2                                                    | 0,90 |
| zinc finger protein 837                                                                                                                                   | ZNF837                                                  | 0,90 |
| glutamyl aminopeptidase (aminopeptidase A)                                                                                                                | ENPEP                                                   | 0,90 |
| TBC1 domain family, member 3B; TBC1 domain family, member 3H; TBC1 domain family, member 3I; TBC1 domain family, member 3F; TBC1 domain family, member 3G | TBC1D3B;<br>TBC1D3H;<br>TBC1D3I;<br>TBC1D3F;<br>TBC1D3G | 0,90 |
| ENTH domain containing 1                                                                                                                                  | ENTHD1                                                  | 0,90 |
| sperm acrosome associated 1                                                                                                                               | SPACA1                                                  | 0,89 |
| zinc finger with KRAB and SCAN domains 7                                                                                                                  | ZKSCAN7                                                 | 0,89 |
| gliomedin                                                                                                                                                 | GLDN                                                    | 0,89 |

|                                                                                                                                                                      |                                         |      |
|----------------------------------------------------------------------------------------------------------------------------------------------------------------------|-----------------------------------------|------|
| RAN binding protein 17                                                                                                                                               | RANBP17                                 | 0,89 |
| speedy/RINGO cell cycle regulator family member E6;<br>speedy/RINGO cell cycle regulator family member E2                                                            | SPDYE6; SPDYE2                          | 0,89 |
| regenerating islet-derived family, member 4                                                                                                                          | REG4                                    | 0,89 |
| vomeronal 1 receptor 4                                                                                                                                               | VN1R4                                   | 0,89 |
| regulator of G-protein signaling 17                                                                                                                                  | RGS17                                   | 0,89 |
| olfactory receptor, family 7, subfamily A, member 10                                                                                                                 | OR7A10                                  | 0,89 |
| tyrosine aminotransferase                                                                                                                                            | TAT                                     | 0,89 |
| Transcript Identified by AceView, Entrez Gene ID(s) 10777                                                                                                            | ARPP21                                  | 0,89 |
| SPO11 meiotic protein covalently bound to DSB                                                                                                                        | SPO11                                   | 0,89 |
| MAGE family member E1                                                                                                                                                | MAGEE1                                  | 0,89 |
| C1GALT1-specific chaperone 1 like                                                                                                                                    | C1GALT1C1L                              | 0,89 |
| Transcript Identified by AceView, Entrez Gene ID(s) 84173                                                                                                            | ELMOD3                                  | 0,89 |
| SRA stem-loop interacting RNA binding protein                                                                                                                        | SLIRP                                   | 0,89 |
| caspase 6                                                                                                                                                            | CASP6                                   | 0,89 |
| chondroitin sulfate proteoglycan 4 pseudogene 1, Y-<br>linked; dynamin 1 pseudogene 24                                                                               | CSPG4P1Y;<br>DNM1P24                    | 0,89 |
| ribosomal protein S6 kinase, 90kDa, polypeptide 1                                                                                                                    | RPS6KA1                                 | 0,89 |
| Memczak2013 ANTISENSE, CDS, coding, INTERNAL best<br>transcript NM_006623                                                                                            | PHGDH                                   | 0,89 |
| runt-related transcription factor 3                                                                                                                                  | RUNX3                                   | 0,89 |
| zinc finger protein 215                                                                                                                                              | ZNF215                                  | 0,89 |
| DEAD (Asp-Glu-Ala-Asp) box polypeptide 19A                                                                                                                           | DDX19A                                  | 0,89 |
| inositol 1,4,5-trisphosphate receptor interacting protein-<br>like 2                                                                                                 | ITPRIPL2                                | 0,89 |
| bone marrow stromal cell antigen 1                                                                                                                                   | BST1                                    | 0,89 |
| eukaryotic translation initiation factor 2, subunit 2 beta,<br>38kDa                                                                                                 | EIF2S2                                  | 0,89 |
| arginine vasopressin receptor 1B                                                                                                                                     | AVPR1B                                  | 0,89 |
| sulfotransferase family 6B member 1                                                                                                                                  | SULT6B1                                 | 0,89 |
| TBCC domain containing 1                                                                                                                                             | TBCCD1                                  | 0,89 |
| Cbp/p300-interacting transactivator, with Glu/Asp rich<br>carboxy-terminal domain, 1                                                                                 | CITED1                                  | 0,89 |
| keratin associated protein 16-1                                                                                                                                      | KRTAP16-1                               | 0,89 |
| uncharacterized LOC101927550; Salzman2013<br>ANTISENSE, CDS, coding, INTERNAL, intronic, OVCODE,<br>OVERLAPTX, OVEXON best transcript NM_020429; novel<br>transcript | LOC101927550;<br>AC004893.11;<br>SMURF1 | 0,89 |
| ankyrin repeat and SOCS box containing 18                                                                                                                            | ASB18                                   | 0,89 |
| protocadherin 11 X-linked                                                                                                                                            | PCDH11X                                 | 0,89 |
| adenosine deaminase domain containing 2                                                                                                                              | ADAD2                                   | 0,89 |
| tumor necrosis factor receptor superfamily, member 21                                                                                                                | TNFRSF21                                | 0,89 |
| KIAA1328                                                                                                                                                             | KIAA1328                                | 0,89 |

|                                                                          |           |      |
|--------------------------------------------------------------------------|-----------|------|
| MRVI1 antisense RNA 1                                                    | MRVI1-AS1 | 0,89 |
| TBC1 domain family, member 31                                            | TBC1D31   | 0,89 |
| dihydropyrimidinase-like 3                                               | DPYSL3    | 0,89 |
| msh homeobox 1                                                           | MSX1      | 0,89 |
| dachsous cadherin-related 1                                              | DCHS1     | 0,89 |
| RBBP8 N-terminal like                                                    | RBBP8NL   | 0,89 |
| spermatogenesis associated 3                                             | SPATA3    | 0,89 |
| leucine-rich repeats and transmembrane domains 1                         | LRTM1     | 0,89 |
| netrin 3                                                                 | NTN3      | 0,89 |
| solute carrier family 5 (sodium/glucose cotransporter), member 2         | SLC5A2    | 0,89 |
| SMAD family member 1                                                     | SMAD1     | 0,89 |
| cyclic nucleotide gated channel alpha 1                                  | CNGA1     | 0,89 |
| ATPase, Na <sup>+</sup> /K <sup>+</sup> transporting, beta 2 polypeptide | ATP1B2    | 0,89 |
| major histocompatibility complex, class II, DR alpha                     | HLA-DRA   | 0,89 |
| mitochondrial ribosomal protein L15                                      | MRPL15    | 0,89 |
| hydroxymethylbilane synthase                                             | HMBS      | 0,89 |
| UDP-GlcNAc:betaGal beta-1,3-N-acetylglucosaminyltransferase 6            | B3GNT6    | 0,89 |
| transmembrane protein 259                                                | TMEM259   | 0,89 |
| cholesterol 25-hydroxylase                                               | CH25H     | 0,89 |
| stimulated by retinoic acid 8                                            | STRA8     | 0,89 |
| ankyrin repeat domain 61                                                 | ANKRD61   | 0,89 |
| solute carrier family 25, member 47                                      | SLC25A47  | 0,89 |
| STT3A, subunit of the oligosaccharyltransferase complex (catalytic)      | STT3A     | 0,89 |
| upstream binding protein 1 (LBP-1a)                                      | UBP1      | 0,89 |
| solute carrier family 52 (riboflavin transporter), member 1              | SLC52A1   | 0,89 |
| growth arrest-specific 7                                                 | GAS7      | 0,89 |
| poly(A) polymerase beta                                                  | PAPOLB    | 0,89 |
| coiled-coil domain containing 167                                        | CCDC167   | 0,89 |
| secretoglobin, family 3A, member 1                                       | SCGB3A1   | 0,89 |



|                                                                                                                                                                                                                                                                                                                                                                                                                                                                                                                                                                                                                                                                                                           |                                                                      |      |
|-----------------------------------------------------------------------------------------------------------------------------------------------------------------------------------------------------------------------------------------------------------------------------------------------------------------------------------------------------------------------------------------------------------------------------------------------------------------------------------------------------------------------------------------------------------------------------------------------------------------------------------------------------------------------------------------------------------|----------------------------------------------------------------------|------|
| Homo sapiens A kinase (PRKA) anchor protein 17A (AKAP17A), transcript variant 1, mRNA.; Homo sapiens A kinase (PRKA) anchor protein 17A (AKAP17A), transcript variant 2, non-coding RNA.; A kinase (PRKA) anchor protein 17A [Source:HGNC Symbol;Acc:HGNC:18783]; Homo sapiens splicing factor, arginine/serine-rich 17A, mRNA (cDNA clone MGC:39904 IMAGE:5217247), complete cds.; Homo sapiens splicing factor, arginine/serine-rich 17A, mRNA (cDNA clone MGC:125365 IMAGE:40007662), complete cds.; Homo sapiens splicing factor, arginine/serine-rich 17A, mRNA (cDNA clone MGC:125366 IMAGE:40007663), complete cds.; Jeck2013 ANNOTATED, INTERNAL, ncRNA, OVCODE, OVEXON best transcript NR_027383 | AKAP17A;<br>SFRS17A                                                  | 0,89 |
| zinc finger, DHHC-type containing 3                                                                                                                                                                                                                                                                                                                                                                                                                                                                                                                                                                                                                                                                       | ZDHHC3                                                               | 0,89 |
| Homo sapiens TBC1 domain family, member 3H (TBC1D3H), mRNA.; Homo sapiens TBC1 domain family, member 3G (TBC1D3G), mRNA.; Homo sapiens TBC1 domain family, member 3I (TBC1D3I), mRNA.; Homo sapiens TBC1 domain family member-like (LOC101060389), mRNA.; Homo sapiens TBC1 domain family, member 3C, mRNA (cDNA clone MGC:87891 IMAGE:5165385), complete cds.; Homo sapiens TBC1 domain family, member 3, mRNA (cDNA clone MGC:87893 IMAGE:5742850), complete cds.                                                                                                                                                                                                                                       | TBC1D3H;<br>TBC1D3G;<br>TBC1D3I;<br>LOC101060389;<br>TBC1D3C; TBC1D3 | 0,89 |
| L-2-hydroxyglutarate dehydrogenase                                                                                                                                                                                                                                                                                                                                                                                                                                                                                                                                                                                                                                                                        | L2HGDH                                                               | 0,89 |
| SURP and G-patch domain containing 1                                                                                                                                                                                                                                                                                                                                                                                                                                                                                                                                                                                                                                                                      | SUGP1                                                                | 0,89 |
| Memczak2013 ALT_ACCEPTOR, ALT_DONOR, INTERNAL, intronic, ncRNA best transcript NR_045602                                                                                                                                                                                                                                                                                                                                                                                                                                                                                                                                                                                                                  | GALNT14                                                              | 0,89 |
| RAB41, member RAS oncogene family                                                                                                                                                                                                                                                                                                                                                                                                                                                                                                                                                                                                                                                                         | RAB41                                                                | 0,89 |
| hypoxia up-regulated 1                                                                                                                                                                                                                                                                                                                                                                                                                                                                                                                                                                                                                                                                                    | HYOU1                                                                | 0,89 |
| tudor domain containing 5                                                                                                                                                                                                                                                                                                                                                                                                                                                                                                                                                                                                                                                                                 | TDRD5                                                                | 0,89 |
| zinc finger, matrin-type 4                                                                                                                                                                                                                                                                                                                                                                                                                                                                                                                                                                                                                                                                                | ZMAT4                                                                | 0,89 |
| exonuclease 5                                                                                                                                                                                                                                                                                                                                                                                                                                                                                                                                                                                                                                                                                             | EXO5                                                                 | 0,89 |
| testis specific protein, Y-linked 8                                                                                                                                                                                                                                                                                                                                                                                                                                                                                                                                                                                                                                                                       | TSPY8                                                                | 0,89 |
| nucleoporin 88kDa                                                                                                                                                                                                                                                                                                                                                                                                                                                                                                                                                                                                                                                                                         | NUP88                                                                | 0,89 |
| secretory carrier membrane protein 1                                                                                                                                                                                                                                                                                                                                                                                                                                                                                                                                                                                                                                                                      | SCAMP1                                                               | 0,89 |
| tripartite motif containing 61                                                                                                                                                                                                                                                                                                                                                                                                                                                                                                                                                                                                                                                                            | TRIM61                                                               | 0,89 |
| ybeY metalloproteinase (putative)                                                                                                                                                                                                                                                                                                                                                                                                                                                                                                                                                                                                                                                                         | YBEY                                                                 | 0,89 |
| mediator complex subunit 8                                                                                                                                                                                                                                                                                                                                                                                                                                                                                                                                                                                                                                                                                | MED8                                                                 | 0,89 |
| ADAM metalloproteinase with thrombospondin type 1 motif 13                                                                                                                                                                                                                                                                                                                                                                                                                                                                                                                                                                                                                                                | ADAMTS13                                                             | 0,89 |
| chromosome 8 open reading frame 76                                                                                                                                                                                                                                                                                                                                                                                                                                                                                                                                                                                                                                                                        | C8orf76                                                              | 0,89 |
| olfactory receptor, family 10, subfamily G, member 3                                                                                                                                                                                                                                                                                                                                                                                                                                                                                                                                                                                                                                                      | OR10G3                                                               | 0,89 |

|                                                                                                                                                                                   |                                            |      |
|-----------------------------------------------------------------------------------------------------------------------------------------------------------------------------------|--------------------------------------------|------|
| chromosome 2 open reading frame 91                                                                                                                                                | C2orf91                                    | 0,89 |
| DMRT-like family C1; family with sequence similarity 226, member B (non-protein coding); family with sequence similarity 226, member A (non-protein coding); DMRT-like family C1B | DMRTC1;<br>FAM226B;<br>FAM226A;<br>DMRTC1B | 0,89 |
| defensin, beta 4A                                                                                                                                                                 | DEFB4A                                     | 0,89 |
| Hermansky-Pudlak syndrome 6                                                                                                                                                       | HPS6                                       | 0,89 |
| family with sequence similarity 178, member B                                                                                                                                     | FAM178B                                    | 0,89 |
| collectin subfamily member 11                                                                                                                                                     | COLEC11                                    | 0,89 |
| spindle and centriole associated protein 1                                                                                                                                        | SPICE1                                     | 0,89 |
| family with sequence similarity 120B                                                                                                                                              | FAM120B                                    | 0,89 |
| developing brain homeobox 1                                                                                                                                                       | DBX1                                       | 0,89 |
| RANBP2-like and GRIP domain containing 5; RANBP2-like and GRIP domain containing 8                                                                                                | RGPD5; RGPD8                               | 0,89 |
| olfactory receptor, family 4, subfamily K, member 14                                                                                                                              | OR4K14                                     | 0,89 |
| integrin alpha FG-GAP repeat containing 2                                                                                                                                         | ITFG2                                      | 0,89 |
| chromosome X open reading frame 38                                                                                                                                                | CXorf38                                    | 0,89 |
| zinc finger protein 493                                                                                                                                                           | ZNF493                                     | 0,89 |
| fucosidase, alpha-L- 2, plasma                                                                                                                                                    | FUCA2                                      | 0,89 |
| NLR family, CARD domain containing 4                                                                                                                                              | NLRC4                                      | 0,89 |
| Memczak2013 ALT_ACCEPTOR, ALT_DONOR, coding, INTERNAL, intronic best transcript NM_001145114                                                                                      | RRP12                                      | 0,89 |
| pro-melanin-concentrating hormone                                                                                                                                                 | PMCH                                       | 0,89 |
| ribosomal protein S17                                                                                                                                                             | RPS17                                      | 0,89 |
| major facilitator superfamily domain containing 14C                                                                                                                               | MFSD14C                                    | 0,89 |
| heterogeneous nuclear ribonucleoprotein H1 (H)                                                                                                                                    | HNRNPH1                                    | 0,89 |
| myotubularin related protein 10                                                                                                                                                   | MTMR10                                     | 0,89 |
| outer dense fiber of sperm tails 3                                                                                                                                                | ODF3                                       | 0,89 |
| frizzled class receptor 6                                                                                                                                                         | FZD6                                       | 0,89 |
| chromosome 1 open reading frame 101                                                                                                                                               | C1orf101                                   | 0,89 |
| chloride channel, voltage-sensitive Kb                                                                                                                                            | CLCNKB                                     | 0,89 |
| chromosome 10 open reading frame 53                                                                                                                                               | C10orf53                                   | 0,89 |
| Jeck2013 ANTISENSE, CDS, coding, INTERNAL, intronic, OVCODE, OVEXON best transcript NM_002473                                                                                     | MYH9                                       | 0,89 |
| biogenesis of lysosomal organelles complex-1, subunit 1                                                                                                                           | BLOC1S1                                    | 0,89 |
| N-acetylgalactosaminidase, alpha-                                                                                                                                                 | NAGA                                       | 0,89 |
| CKLF-like MARVEL transmembrane domain containing 6                                                                                                                                | CMTM6                                      | 0,89 |
| zinc and ring finger 3                                                                                                                                                            | ZNRF3                                      | 0,89 |
| dual specificity tyrosine-(Y)-phosphorylation regulated kinase 1B                                                                                                                 | DYRK1B                                     | 0,89 |
| checkpoint kinase 2                                                                                                                                                               | CHEK2                                      | 0,89 |
| chromodomain protein, Y-linked, 2A                                                                                                                                                | CDY2A                                      | 0,89 |
| vertebrae development associated                                                                                                                                                  | VRTN                                       | 0,89 |
| paraspeckle component 1                                                                                                                                                           | PSPC1                                      | 0,89 |

|                                                                  |           |      |
|------------------------------------------------------------------|-----------|------|
| proteasome (prosome, macropain) assembly chaperone 2             | PSMG2     | 0,89 |
| endogenous retrovirus group FRD, member 1                        | ERVFRD-1  | 0,89 |
| tumor necrosis factor receptor superfamily, member 14            | TNFRSF14  | 0,89 |
| developmental pluripotency associated 2                          | DPPA2     | 0,89 |
| ribosomal protein S19 binding protein 1                          | RPS19BP1  | 0,89 |
| RAD9 checkpoint clamp component A                                | RAD9A     | 0,89 |
| gasdermin B                                                      | GSDMB     | 0,89 |
| peptidyl arginine deiminase, type IV                             | PADI4     | 0,89 |
| potassium channel, voltage gated modifier subfamily G, member 2  | KCNG2     | 0,89 |
| solute carrier family 6 (neurotransmitter transporter), member 3 | SLC6A3    | 0,89 |
| oxidase (cytochrome c) assembly 1-like                           | OXA1L     | 0,89 |
| long intergenic non-protein coding RNA 615                       | LINC00615 | 0,89 |
| leucine rich repeat and Ig domain containing 2                   | LINGO2    | 0,89 |
| asparaginase                                                     | ASPG      | 0,89 |
| tetratricopeptide repeat domain 30A                              | TTC30A    | 0,89 |
| family with sequence similarity 193, member B                    | FAM193B   | 0,89 |
| transmembrane 9 superfamily protein member 4                     | TM9SF4    | 0,89 |
| tumor necrosis factor receptor superfamily, member 17            | TNFRSF17  | 0,89 |
| secretoglobin, family 1C, member 2                               | SCGB1C2   | 0,89 |
| D4, zinc and double PHD fingers family 1                         | DPF1      | 0,89 |
| phosphoribosyl pyrophosphate synthetase 1                        | PRPS1     | 0,89 |
| estrogen receptor 1                                              | ESR1      | 0,89 |
| RAS guanyl releasing protein 1 (calcium and DAG-regulated)       | RASGRP1   | 0,89 |
| U2 small nuclear RNA auxiliary factor 2                          | U2AF2     | 0,89 |
| forkhead box E3                                                  | FOXE3     | 0,89 |
| SH3 domain binding kinase 1                                      | SBK1      | 0,89 |
| neuregulin 3                                                     | NRG3      | 0,89 |
| integrin alpha 9                                                 | ITGA9     | 0,89 |
| MAX dimerization protein 3                                       | MXD3      | 0,89 |
| G protein-coupled receptor 155                                   | GPR155    | 0,89 |
| GAS8 antisense RNA 1                                             | GAS8-AS1  | 0,89 |
| serine peptidase inhibitor, Kazal type 13 (putative)             | SPINK13   | 0,89 |
| DnaJ (Hsp40) homolog, subfamily A, member 2                      | DNAJA2    | 0,89 |
| proenkephalin                                                    | PENK      | 0,89 |
| PDZ domain containing 7                                          | PDZD7     | 0,89 |
| branched chain amino-acid transaminase 1, cytosolic              | BCAT1     | 0,89 |
| mucin 17, cell surface associated                                | MUC17     | 0,89 |
| zinc finger, C2HC-type containing 1B                             | ZC2HC1B   | 0,89 |
| ribosomal protein S6 kinase, 90kDa, polypeptide 1                | RPS6KA1   | 0,89 |
| translocase of inner mitochondrial membrane 44 homolog (yeast)   | TIMM44    | 0,89 |

|                                                                                                                                                            |                                        |      |
|------------------------------------------------------------------------------------------------------------------------------------------------------------|----------------------------------------|------|
| aralkylamine N-acetyltransferase                                                                                                                           | AANAT                                  | 0,89 |
| putative uncharacterized protein FLJ37770-like; Transcript Identified by AceView, Entrez Gene ID(s) 387790; novel transcript                               | LOC100506127; RP11-111M22.2; LOC387790 | 0,89 |
| parkinson protein 7                                                                                                                                        | PARK7                                  | 0,89 |
| myopalladin                                                                                                                                                | MYPN                                   | 0,89 |
| MAGEA10-MAGEA5 readthrough; novel transcript                                                                                                               | MAGEA10-MAGEA5; RP11-1007113.4         | 0,89 |
| myosin, heavy chain 7B, cardiac muscle, beta                                                                                                               | MYH7B                                  | 0,89 |
| polypyrimidine tract binding protein 1; microRNA 4745                                                                                                      | PTBP1; MIR4745                         | 0,89 |
| family with sequence similarity 212, member A                                                                                                              | FAM212A                                | 0,89 |
| thrombospondin 2                                                                                                                                           | THBS2                                  | 0,89 |
| solute carrier family 24 (sodium/potassium/calcium exchanger), member 1                                                                                    | SLC24A1                                | 0,89 |
| tumor necrosis factor (ligand) superfamily, member 4                                                                                                       | TNFSF4                                 | 0,89 |
| Memczak2013 ANTISENSE, CDS, coding, INTERNAL best transcript NM_002957                                                                                     | RXRA                                   | 0,89 |
| hydroxymethylbilane synthase                                                                                                                               | HMBS                                   | 0,89 |
| heat shock protein 90kDa alpha (cytosolic), class B member 1                                                                                               | HSP90AB1                               | 0,89 |
| keratin 84, type II                                                                                                                                        | KRT84                                  | 0,89 |
| rhomboid, veinlet-like 1 (Drosophila)                                                                                                                      | RHBDL1                                 | 0,89 |
| potassium channel, voltage gated shaker related subfamily A, member 6; polypeptide N-acetylgalactosaminyltransferase 8                                     | KCNA6; GALNT8                          | 0,89 |
| HMP19 protein; Neuron-specific protein family member 2 [Source:UniProtKB/Swiss-Prot;Acc:Q9Y328]; Transcript Identified by AceView, Entrez Gene ID(s) 51617 | HMP19                                  | 0,89 |
| HECT and RLD domain containing E3 ubiquitin protein ligase 3                                                                                               | HERC3                                  | 0,89 |
| SERTA domain containing 4                                                                                                                                  | SERTAD4                                | 0,89 |
| neurotensin receptor 2                                                                                                                                     | NTSR2                                  | 0,89 |
| mitochondrial poly(A) polymerase                                                                                                                           | MTPAP                                  | 0,89 |
| thrombospondin type 1 domain containing 1                                                                                                                  | THSD1                                  | 0,89 |
| transmembrane protein 95                                                                                                                                   | TMEM95                                 | 0,89 |
| Kruppel-like factor 8                                                                                                                                      | KLF8                                   | 0,89 |
| testis specific protein, Y-linked 1                                                                                                                        | TSPY1                                  | 0,89 |
| tudor domain containing 1                                                                                                                                  | TDRD1                                  | 0,89 |
| patatin-like phospholipase domain containing 7                                                                                                             | PNPLA7                                 | 0,89 |
| IKAROS family zinc finger 2                                                                                                                                | IKZF2                                  | 0,89 |
| chromosome 5 open reading frame 56                                                                                                                         | C5orf56                                | 0,89 |
| UDP-Gal:betaGlcNAc beta 1,3-galactosyltransferase 1                                                                                                        | B3GALT1                                | 0,89 |
| TXK tyrosine kinase                                                                                                                                        | TXK                                    | 0,89 |
| arginine vasopressin receptor 2                                                                                                                            | AVPR2                                  | 0,89 |

|                                                                                              |                  |      |
|----------------------------------------------------------------------------------------------|------------------|------|
| protein tyrosine phosphatase, non-receptor type 5 (striatum-enriched)                        | PTPN5            | 0,89 |
| transmembrane protein 205                                                                    | TMEM205          | 0,89 |
| glutamate rich 6                                                                             | ERICH6           | 0,89 |
| protocadherin 9                                                                              | PCDH9            | 0,89 |
| SLIT and NTRK-like family, member 6                                                          | SLITRK6          | 0,89 |
| baculoviral IAP repeat containing 2                                                          | BIRC2            | 0,89 |
| integrin beta 1 binding protein (melusin) 2                                                  | ITGB1BP2         | 0,89 |
| PSMB8 antisense RNA 1 (head to head)                                                         | PSMB8-AS1        | 0,89 |
| apolipoprotein B mRNA editing enzyme, catalytic polypeptide-like 3A                          | APOBEC3A         | 0,89 |
| Memczak2013 ALT_ACCEPTOR, ALT_DONOR, coding, INTERNAL, intronic best transcript NM_002865    | RAB2A            | 0,89 |
| serine/arginine repetitive matrix 3                                                          | SRRM3            | 0,89 |
| olfactory receptor, family 5, subfamily H, member 1                                          | OR5H1            | 0,89 |
| olfactory receptor, family 1, subfamily J, member 1                                          | OR1J1            | 0,89 |
| chromatin assembly factor 1, subunit A (p150)                                                | CHAF1A           | 0,89 |
| regulator of G-protein signaling 7 binding protein                                           | RGS7BP           | 0,89 |
| CLOCK-interacting pacemaker                                                                  | CIPC             | 0,89 |
| chromosome 2 open reading frame 80                                                           | C2orf80          | 0,89 |
| noggin                                                                                       | NOG              | 0,89 |
| mitochondrial ribosomal protein L44                                                          | MRPL44           | 0,89 |
| heterogeneous nuclear ribonucleoprotein U (scaffold attachment factor A)                     | HNRNPU           | 0,89 |
| tubby like protein 4                                                                         | TULP4            | 0,89 |
| zinc finger protein 385B                                                                     | ZNF385B          | 0,89 |
| filamin A interacting protein 1                                                              | FILIP1           | 0,89 |
| K(lysine) acetyltransferase 6B                                                               | KAT6B            | 0,89 |
| ubiquitin conjugating enzyme E2K                                                             | UBE2K            | 0,89 |
| intraflagellar transport 57                                                                  | IFT57            | 0,89 |
| death inducer-obliterators 1                                                                 | DIDO1            | 0,89 |
| poly(rC) binding protein 2; PCBP2 overlapping transcript 1                                   | PCBP2; PCBP2-OT1 | 0,89 |
| Memczak2013 ALT_ACCEPTOR, ALT_DONOR, coding, INTERNAL, intronic best transcript NM_001190821 | SMAD7            | 0,89 |
| G protein-coupled receptor 171                                                               | GPR171           | 0,89 |
| C-type lectin domain family 4, member G                                                      | CLEC4G           | 0,89 |
| arrestin domain containing 1                                                                 | ARRDC1           | 0,89 |
| trimethylguanosine synthase 1                                                                | TGS1             | 0,89 |
| family with sequence similarity 92, member A1                                                | FAM92A1          | 0,89 |
| cytochrome P450, family 2, subfamily A, polypeptide 6                                        | CYP2A6           | 0,89 |
| molybdenum cofactor synthesis 2                                                              | MOCS2            | 0,89 |
| zinc finger protein 333                                                                      | ZNF333           | 0,89 |
| calmodulin-like 5                                                                            | CALML5           | 0,89 |
| pseudouridylate synthase 1                                                                   | PUS1             | 0,89 |

|                                                                                                                                                                                                                   |                       |      |
|-------------------------------------------------------------------------------------------------------------------------------------------------------------------------------------------------------------------|-----------------------|------|
| dachshund family transcription factor 1                                                                                                                                                                           | DACH1                 | 0,89 |
| hydroxyacyl-CoA dehydrogenase/3-ketoacyl-CoA thiolase/enoyl-CoA hydratase (trifunctional protein), beta subunit                                                                                                   | HADHB                 | 0,89 |
| eukaryotic translation initiation factor 4E nuclear import factor 1                                                                                                                                               | EIF4ENIF1             | 0,89 |
| phospholipase C, delta 1                                                                                                                                                                                          | PLCD1                 | 0,89 |
| fibronectin type III and SPRY domain containing 1-like                                                                                                                                                            | FSD1L                 | 0,89 |
| PRAME family member 16; PRAME family member 17                                                                                                                                                                    | PRAMEF16;<br>PRAMEF17 | 0,89 |
| CDC42 small effector 2                                                                                                                                                                                            | CDC42SE2              | 0,89 |
| tripartite motif containing 67                                                                                                                                                                                    | TRIM67                | 0,89 |
| l(3)mbt-like 1 (Drosophila)                                                                                                                                                                                       | L3MBTL1               | 0,89 |
| zinc finger protein 683                                                                                                                                                                                           | ZNF683                | 0,89 |
| neuroblastoma breakpoint family, member 11                                                                                                                                                                        | NBPF11                | 0,89 |
| cartilage associated protein                                                                                                                                                                                      | CRTAP                 | 0,89 |
| NLR family, pyrin domain containing 10                                                                                                                                                                            | NLRP10                | 0,89 |
| cell division cycle 20B                                                                                                                                                                                           | CDC20B                | 0,89 |
| phosphomevalonate kinase                                                                                                                                                                                          | PMVK                  | 0,89 |
| leucine rich repeat containing 4                                                                                                                                                                                  | LRRC4                 | 0,89 |
| aquaporin 4                                                                                                                                                                                                       | AQP4                  | 0,89 |
| fucose-1-phosphate guanylyltransferase                                                                                                                                                                            | FPGT                  | 0,89 |
| growth factor receptor bound protein 14                                                                                                                                                                           | GRB14                 | 0,89 |
| dynein, axonemal, assembly factor 3                                                                                                                                                                               | DNAAF3                | 0,89 |
| short chain dehydrogenase/reductase family 9C, member 7                                                                                                                                                           | SDR9C7                | 0,89 |
| Na <sup>+</sup> /K <sup>+</sup> transporting ATPase interacting 2                                                                                                                                                 | NKAIN2                | 0,89 |
| Synthetic construct Homo sapiens clone IMAGE:100062553, MGC:190557 B melanoma antigen family, member 5 (BAGE5) mRNA, encodes complete protein.; B melanoma antigen family, member 5 [Source:EntrezGene;Acc:85316] | BAGE5                 | 0,89 |
| charged multivesicular body protein 2B                                                                                                                                                                            | CHMP2B                | 0,89 |
| olfactory receptor, family 3, subfamily A, member 3                                                                                                                                                               | OR3A3                 | 0,89 |
| zinc finger protein 250                                                                                                                                                                                           | ZNF250                | 0,89 |
| transmembrane protein 132C                                                                                                                                                                                        | TMEM132C              | 0,89 |
| Transcript Identified by AceView, Entrez Gene ID(s) 5747                                                                                                                                                          | PTK2                  | 0,89 |
| solute carrier family 6 (neurotransmitter transporter), member 5                                                                                                                                                  | SLC6A5                | 0,89 |
| chromosome 16 open reading frame 91                                                                                                                                                                               | C16orf91              | 0,89 |
| keratin associated protein 10-4                                                                                                                                                                                   | KRTAP10-4             | 0,89 |
| integrin beta 6                                                                                                                                                                                                   | ITGB6                 | 0,89 |
| smu-1 suppressor of mec-8 and unc-52 homolog (C. elegans)                                                                                                                                                         | SMU1                  | 0,89 |

|                                                                                           |           |      |
|-------------------------------------------------------------------------------------------|-----------|------|
| natriuretic peptide B                                                                     | NPPB      | 0,89 |
| chromosome 10 open reading frame 120                                                      | C10orf120 | 0,89 |
| translocase of inner mitochondrial membrane 9 homolog (yeast)                             | TIMM9     | 0,89 |
| glutamine rich 2                                                                          | QRICH2    | 0,89 |
| protein kinase (cAMP-dependent, catalytic) inhibitor alpha                                | PKIA      | 0,89 |
| myoregulin                                                                                | MRLN      | 0,89 |
| Jeck2013 ALT_ACCEPTOR, ALT_DONOR, coding, INTERNAL, intronic best transcript NM_001160133 | KCNQ5     | 0,89 |
| kinase non-catalytic C-lobe domain (KIND) containing 1                                    | KNDC1     | 0,89 |
| tRNA nucleotidyl transferase, CCA-adding, 1                                               | TRNT1     | 0,89 |
| tumor necrosis factor receptor superfamily, member 25                                     | TNFRSF25  | 0,89 |
| FLT3-interacting zinc finger 1                                                            | FIZ1      | 0,89 |
| ets variant 2                                                                             | ETV2      | 0,89 |
| PHD finger protein 19                                                                     | PHF19     | 0,89 |
| aminocarboxymuconate semialdehyde decarboxylase                                           | ACMSD     | 0,89 |
| titin                                                                                     | TTN       | 0,89 |
| S1 RNA binding domain 1                                                                   | SRBD1     | 0,89 |
| cadherin 20, type 2                                                                       | CDH20     | 0,89 |
| TAF5-like RNA polymerase II, p300/CBP-associated factor (PCAF)-associated factor, 65kDa   | TAF5L     | 0,89 |
| RAD9-HUS1-RAD1 interacting nuclear orphan 1                                               | RHNO1     | 0,89 |
| epoxide hydrolase 3                                                                       | EPHX3     | 0,89 |
| olfactory receptor, family 10, subfamily A, member 7                                      | OR10A7    | 0,89 |
| ring finger protein 150                                                                   | RNF150    | 0,89 |
| GTP binding protein 6 (putative)                                                          | GTPBP6    | 0,89 |
| leucine rich repeat containing 73                                                         | LRRC73    | 0,89 |
| olfactory receptor, family 1, subfamily E, member 3 (gene/pseudogene)                     | OR1E3     | 0,89 |
| Jeck2013 ALT_ACCEPTOR, ALT_DONOR, coding, INTERNAL, intronic best transcript NM_004787    | SLIT2     | 0,89 |
| neuralized E3 ubiquitin protein ligase 2                                                  | NEURL2    | 0,89 |
| Memczak2013 ANTISENSE, coding, INTERNAL, intronic best transcript NM_006721               | ADK       | 0,89 |
| transforming growth factor, beta-induced, 68kDa                                           | TGFBI     | 0,89 |
| mitochondrial ribosomal protein S18C                                                      | MRPS18C   | 0,89 |
| transition protein 1 (during histone to protamine replacement)                            | TNP1      | 0,89 |
| synaptotagmin XIV                                                                         | SYT14     | 0,89 |
| chromosome 10 open reading frame 25                                                       | C10orf25  | 0,89 |
| gem nuclear organelle associated protein 8                                                | GEMIN8    | 0,89 |
| transmembrane protein 257                                                                 | TMEM257   | 0,89 |
| transmembrane protein 145                                                                 | TMEM145   | 0,89 |
| protein arginine methyltransferase 9                                                      | PRMT9     | 0,89 |

|                                                                                                           |                           |      |
|-----------------------------------------------------------------------------------------------------------|---------------------------|------|
| Fc receptor, IgA, IgM, high affinity                                                                      | FCAMR                     | 0,89 |
| zinc finger protein 532                                                                                   | ZNF532                    | 0,88 |
|                                                                                                           | PRAMEF9                   | 0,88 |
| fibroblast growth factor 17                                                                               | FGF17                     | 0,88 |
| keratin associated protein 8-1                                                                            | KRTAP8-1                  | 0,88 |
| hornerin                                                                                                  | HRNR                      | 0,88 |
| echinoderm microtubule associated protein like 3                                                          | EML3                      | 0,88 |
| lipoprotein lipase                                                                                        | LPL                       | 0,88 |
| tetratricopeptide repeat domain 23                                                                        | TTC23                     | 0,88 |
| chemokine (C-C motif) ligand 14; chemokine (C-C motif) ligand 15; CCL15-CCL14 readthrough (NMD candidate) | CCL14; CCL15; CCL15-CCL14 | 0,88 |
| actin-like 9                                                                                              | ACTL9                     | 0,88 |
| coiled-coil domain containing 87                                                                          | CCDC87                    | 0,88 |
| HTR5A antisense RNA 1                                                                                     | HTR5A-AS1                 | 0,88 |
| dyslexia susceptibility 1 candidate 1                                                                     | DYX1C1                    | 0,88 |
| forkhead box D4-like 3                                                                                    | FOXD4L3                   | 0,88 |
| Zhang2013 ALT_ACCEPTOR, ALT_DONOR, coding, INTERNAL, intronic best transcript NM_001145297                | EXOC7                     | 0,88 |
| methionine sulfoxide reductase B1                                                                         | MSRB1                     | 0,88 |
| potassium channel, inwardly rectifying subfamily J, member 6                                              | KCNJ6                     | 0,88 |
| Transcript Identified by AceView, Entrez Gene ID(s) 7881                                                  | KCNAB1                    | 0,88 |
| heat shock transcription factor, Y-linked 2; heat shock transcription factor, Y-linked 1                  | HSFY2; HSFY1              | 0,88 |
| guanylyl cyclase domain containing 1                                                                      | GUCD1                     | 0,88 |
| FRY like transcription coactivator                                                                        | FRYL                      | 0,88 |
| neurexophilin 1                                                                                           | NXPH1                     | 0,88 |
| NHP2 ribonucleoprotein                                                                                    | NHP2                      | 0,88 |
| pancreas specific transcription factor, 1a                                                                | PTF1A                     | 0,88 |
| olfactory receptor, family 13, subfamily G, member 1                                                      | OR13G1                    | 0,88 |
| nucleosome assembly protein 1-like 4                                                                      | NAP1L4                    | 0,88 |
| topoisomerase (DNA) III alpha                                                                             | TOP3A                     | 0,88 |
| MAS1 proto-oncogene like, G protein-coupled receptor                                                      | MAS1L                     | 0,88 |
| B-cell CLL/lymphoma 11B (zinc finger protein)                                                             | BCL11B                    | 0,88 |
| phosphodiesterase 4C, cAMP-specific                                                                       | PDE4C                     | 0,88 |
| Memczak2013 ALT_DONOR, coding, INTERNAL, intronic best transcript NM_001421                               | ELF4                      | 0,88 |
| chromosome 16 open reading frame 78                                                                       | C16orf78                  | 0,88 |
| alpha-1,4-N-acetylglucosaminyltransferase                                                                 | A4GNT                     | 0,88 |
| POM121 transmembrane nucleoporin                                                                          | POM121                    | 0,88 |
| ectonucleotide pyrophosphatase/phosphodiesterase 7                                                        | ENPP7                     | 0,88 |
| exostosin glycosyltransferase 1                                                                           | EXT1                      | 0,88 |
| olfactory receptor, family 6, subfamily C, member 4                                                       | OR6C4                     | 0,88 |
| peptidyl arginine deiminase, type IV                                                                      | PADI4                     | 0,88 |



|                                                                                                            |                 |      |
|------------------------------------------------------------------------------------------------------------|-----------------|------|
| zona pellucida-like domain containing 1                                                                    | ZPLD1           | 0,88 |
| olfactory receptor, family 11, subfamily G, member 2                                                       | OR11G2          | 0,88 |
| major histocompatibility complex, class I, L (pseudogene)                                                  | HLA-L           | 0,88 |
| transducin-like enhancer of split 2                                                                        | TLE2            | 0,88 |
| Kruppel-like factor 15                                                                                     | KLF15           | 0,88 |
| PDS5 cohesin associated factor A                                                                           | PDS5A           | 0,88 |
| sorting nexin family member 21                                                                             | SNX21           | 0,88 |
| Transcript Identified by AceView, Entrez Gene ID(s) 288                                                    | ANK3            | 0,88 |
| leukocyte cell-derived chemotaxin 2                                                                        | LECT2           | 0,88 |
| interferon regulatory factor 2 binding protein 1                                                           | IRF2BP1         | 0,88 |
| speedy/RINGO cell cycle regulator family member E2;<br>speedy/RINGO cell cycle regulator family member E2B | SPDYE2; SPDYE2B | 0,88 |
| speedy/RINGO cell cycle regulator family member E2B                                                        | SPDYE2B         | 0,88 |
| Jrk helix-turn-helix protein                                                                               | JRK             | 0,88 |
| ubiquitin specific peptidase 21                                                                            | USP21           | 0,88 |
| insulinoma-associated 2                                                                                    | INSM2           | 0,88 |
| dopamine receptor D5                                                                                       | DRD5            | 0,88 |
| transient receptor potential cation channel, subfamily M,<br>member 2                                      | TRPM2           | 0,88 |
| secretoglobin, family 2B, member 2                                                                         | SCGB2B2         | 0,88 |
| T cell-interacting, activating receptor on myeloid cells 1                                                 | TARM1           | 0,88 |
| phenylalanine hydroxylase                                                                                  | PAH             | 0,88 |
| syntaxin 1B                                                                                                | STX1B           | 0,88 |
| ubiquitin specific peptidase 43                                                                            | USP43           | 0,88 |
| FLYWCH family member 2                                                                                     | FLYWCH2         | 0,88 |
| ankyrin repeat domain 34A                                                                                  | ANKRD34A        | 0,88 |
| Src homology 2 domain containing E                                                                         | SHE             | 0,88 |
| lysine (K)-specific demethylase 4D                                                                         | KDM4D           | 0,88 |
| chromodomain protein, Y-linked, 1                                                                          | CDY1            | 0,88 |
| nucleosome assembly protein 1-like 1                                                                       | NAP1L1          | 0,88 |
| choline O-acetyltransferase                                                                                | CHAT            | 0,88 |
| PDZ domain containing 2                                                                                    | PDZD2           | 0,88 |
| tumor suppressor candidate 1                                                                               | TUSC1           | 0,88 |
| gamma-glutamyltransferase 7                                                                                | GGT7            | 0,88 |
| ISG15 ubiquitin-like modifier                                                                              | ISG15           | 0,88 |
| meiotic nuclear divisions 1                                                                                | MND1            | 0,88 |
| naked cuticle homolog 2 (Drosophila)                                                                       | NKD2            | 0,88 |
| pre-mRNA processing factor 38A                                                                             | PRPF38A         | 0,88 |
| tripartite motif containing 9                                                                              | TRIM9           | 0,88 |
| sentan, cilia apical structure protein                                                                     | SNTN            | 0,88 |
| rippy transcriptional repressor 2                                                                          | RIPPLY2         | 0,88 |
| serine peptidase inhibitor, Kazal type 5                                                                   | SPINK5          | 0,88 |
| mitochondrial ribosomal protein L3                                                                         | MRPL3           | 0,88 |
| transmembrane 9 superfamily member 3                                                                       | TM9SF3          | 0,88 |

|                                                                                                          |             |      |
|----------------------------------------------------------------------------------------------------------|-------------|------|
| interleukin enhancer binding factor 2                                                                    | ILF2        | 0,88 |
| HscB mitochondrial iron-sulfur cluster co-chaperone                                                      | HSCB        | 0,88 |
| phosphatidylinositol-specific phospholipase C, X domain containing 3                                     | PLCXD3      | 0,88 |
| TROVE domain family, member 2                                                                            | TROVE2      | 0,88 |
| sterile alpha motif domain containing 7                                                                  | SAMD7       | 0,88 |
| excision repair cross-complementation group 3                                                            | ERCC3       | 0,88 |
| cyclic nucleotide binding domain containing 1                                                            | CNBD1       | 0,88 |
| Memczak2013 ANTISENSE, CDS, coding, INTERNAL best transcript NM_153280; Transcript Identified by AceView | UBA1; tydee | 0,88 |
| solute carrier family 22 (organic anion transporter), member 8                                           | SLC22A8     | 0,88 |
| collagen, type XVI, alpha 1                                                                              | COL16A1     | 0,88 |
| chromosome 9 open reading frame 57                                                                       | C9orf57     | 0,88 |
| phospholipase D family, member 6                                                                         | PLD6        | 0,88 |
| poly(A) binding protein, cytoplasmic 5                                                                   | PABPC5      | 0,88 |
| phosphoglycerate kinase 2                                                                                | PGK2        | 0,88 |
| TP53 target 3B                                                                                           | TP53TG3B    | 0,88 |
| Transcript Identified by AceView, Entrez Gene ID(s) 138050                                               | HGSNAT      | 0,88 |
| SWI/SNF related, matrix associated, actin dependent regulator of chromatin, subfamily d, member 1        | SMARCD1     | 0,88 |
| upstream binding transcription factor, RNA polymerase I                                                  | UBTF        | 0,88 |
| Zhang2013 ALT_ACCEPTOR, ALT_DONOR, coding, INTERNAL, intronic best transcript NM_025176                  | NINL        | 0,88 |
| ribosomal protein L4                                                                                     | RPL4        | 0,88 |
| chaperonin containing TCP1, subunit 5 (epsilon)                                                          | CCT5        | 0,88 |
| kinase insert domain receptor                                                                            | KDR         | 0,88 |
| ARFGEF family member 3                                                                                   | ARFGEF3     | 0,88 |
| tachykinin 4 (hemokinin)                                                                                 | TAC4        | 0,88 |
| forkhead box P3                                                                                          | FOXP3       | 0,88 |
| plexin A4                                                                                                | PLXNA4      | 0,88 |
| Memczak2013 ALT_ACCEPTOR, ALT_DONOR, coding, INTERNAL, intronic best transcript NM_006454                | MXD4        | 0,88 |
| ankyrin repeat domain 30A                                                                                | ANKRD30A    | 0,88 |
| RNA 2,3-cyclic phosphate and 5-OH ligase                                                                 | RTCB        | 0,88 |
| glutathione S-transferase mu 5                                                                           | GSTM5       | 0,88 |
| junctional sarcoplasmic reticulum protein 1                                                              | JSRP1       | 0,88 |
| butyrylcholinesterase                                                                                    | BCHE        | 0,88 |
| SSU72 homolog, RNA polymerase II CTD phosphatase                                                         | SSU72       | 0,88 |
| taste receptor, type 2, member 13                                                                        | TAS2R13     | 0,88 |
| methyl-CpG binding domain protein 3-like 4                                                               | MBD3L4      | 0,88 |
| BRX1, biogenesis of ribosomes                                                                            | BRX1        | 0,88 |
| adhesion G protein-coupled receptor G4                                                                   | ADGRG4      | 0,88 |

|                                                                                                                                                                                                                                                                                                                                                                        |                     |      |
|------------------------------------------------------------------------------------------------------------------------------------------------------------------------------------------------------------------------------------------------------------------------------------------------------------------------------------------------------------------------|---------------------|------|
| MYB binding protein (P160) 1a                                                                                                                                                                                                                                                                                                                                          | MYBBP1A             | 0,88 |
| Transcript Identified by AceView, Entrez Gene ID(s) 6777                                                                                                                                                                                                                                                                                                               | STAT5B              | 0,88 |
| Rho GTPase activating protein 11B                                                                                                                                                                                                                                                                                                                                      | ARHGAP11B           | 0,88 |
| family with sequence similarity 161, member A                                                                                                                                                                                                                                                                                                                          | FAM161A             | 0,88 |
| aspartoacylase                                                                                                                                                                                                                                                                                                                                                         | ASPA                | 0,88 |
| CPX chromosome region, candidate 1                                                                                                                                                                                                                                                                                                                                     | CPXCR1              | 0,88 |
| G protein-coupled receptor 26                                                                                                                                                                                                                                                                                                                                          | GPR26               | 0,88 |
| mesoderm induction early response 1, family member 2                                                                                                                                                                                                                                                                                                                   | MIER2               | 0,88 |
| family with sequence similarity 180, member B                                                                                                                                                                                                                                                                                                                          | FAM180B             | 0,88 |
| cryptochrome circadian clock 2                                                                                                                                                                                                                                                                                                                                         | CRY2                | 0,88 |
| chromosome 19 open reading frame 60                                                                                                                                                                                                                                                                                                                                    | C19orf60            | 0,88 |
| SET and MYND domain containing 2                                                                                                                                                                                                                                                                                                                                       | SMYD2               | 0,88 |
| adhesion G protein-coupled receptor L4                                                                                                                                                                                                                                                                                                                                 | ADGRL4              | 0,88 |
| makorin ring finger protein 3                                                                                                                                                                                                                                                                                                                                          | MKRN3               | 0,88 |
| solute carrier family 26 (anion exchanger), member 6;<br>microRNA 6824                                                                                                                                                                                                                                                                                                 | SLC26A6;<br>MIR6824 | 0,88 |
| CTP synthase 2                                                                                                                                                                                                                                                                                                                                                         | CTPS2               | 0,88 |
| superoxide dismutase 2, mitochondrial                                                                                                                                                                                                                                                                                                                                  | SOD2                | 0,88 |
| leucine rich repeat and Ig domain containing 3                                                                                                                                                                                                                                                                                                                         | LINGO3              | 0,88 |
| growth hormone 1                                                                                                                                                                                                                                                                                                                                                       | GH1                 | 0,88 |
| olfactory receptor, family 5, subfamily F, member 1                                                                                                                                                                                                                                                                                                                    | OR5F1               | 0,88 |
| islet cell autoantigen 1                                                                                                                                                                                                                                                                                                                                               | ICA1                | 0,88 |
| phospholipase A2, group IIE                                                                                                                                                                                                                                                                                                                                            | PLA2G2E             | 0,88 |
| SPATA31 subfamily A, member 6                                                                                                                                                                                                                                                                                                                                          | SPATA31A6           | 0,88 |
| kelch-like family member 33                                                                                                                                                                                                                                                                                                                                            | KLHL33              | 0,88 |
| zinc finger protein 48                                                                                                                                                                                                                                                                                                                                                 | ZNF48               | 0,88 |
| K(lysine) acetyltransferase 6B                                                                                                                                                                                                                                                                                                                                         | KAT6B               | 0,88 |
| phospholipase A2, group XIIA                                                                                                                                                                                                                                                                                                                                           | PLA2G12A            | 0,88 |
| solute carrier family 7 (cationic amino acid transporter,<br>y+ system), member 1                                                                                                                                                                                                                                                                                      | SLC7A1              | 0,88 |
| kinesin family member 1A                                                                                                                                                                                                                                                                                                                                               | KIF1A               | 0,88 |
| methylmalonic aciduria (cobalamin deficiency) cblA type                                                                                                                                                                                                                                                                                                                | MMAA                | 0,88 |
| SLIT and NTRK-like family, member 4                                                                                                                                                                                                                                                                                                                                    | SLITRK4             | 0,88 |
| recombination activating gene 2                                                                                                                                                                                                                                                                                                                                        | RAG2                | 0,88 |
| Homo sapiens testis specific protein, Y-linked 3, mRNA<br>(cDNA clone MGC:103998 IMAGE:30915406), complete<br>cds.; Homo sapiens similar to testis specific protein, Y-<br>linked 1, mRNA (cDNA clone MGC:150413<br>IMAGE:40120433), complete cds.; Homo sapiens testis<br>specific protein, Y-linked 3, mRNA (cDNA clone<br>MGC:150414 IMAGE:40120435), complete cds. | TSPY3;<br>LOC728395 | 0,88 |
| SET and MYND domain containing 3                                                                                                                                                                                                                                                                                                                                       | SMYD3               | 0,88 |
| transcription elongation factor, mitochondrial                                                                                                                                                                                                                                                                                                                         | TEFM                | 0,88 |

|                                                                                                             |                                  |      |
|-------------------------------------------------------------------------------------------------------------|----------------------------------|------|
| CDC like kinase 2                                                                                           | CLK2                             | 0,88 |
| nei-like DNA glycosylase 1                                                                                  | NEIL1                            | 0,88 |
| olfactory receptor, family 1, subfamily N, member 1                                                         | OR1N1                            | 0,88 |
| kinesin family member 15                                                                                    | KIF15                            | 0,88 |
| coiled-coil domain containing 12                                                                            | CCDC12                           | 0,88 |
| Sjogren syndrome antigen B (autoantigen La)                                                                 | SSB                              | 0,88 |
| chromosome 11 open reading frame 94                                                                         | C11orf94                         | 0,88 |
| cylicin, basic protein of sperm head cytoskeleton 2                                                         | CYLC2                            | 0,88 |
| long intergenic non-protein coding RNA 1219                                                                 | LINC01219                        | 0,88 |
| olfactory receptor, family 6, subfamily C, member 70                                                        | OR6C70                           | 0,88 |
| phosphatidylinositol glycan anchor biosynthesis class K                                                     | PIGK                             | 0,88 |
| uncharacterized LOC100505478; putative novel transcript                                                     | LOC100505478;<br>RP11-402G3.3    | 0,88 |
| olfactory receptor, family 7, subfamily D, member 4                                                         | OR7D4                            | 0,88 |
| adaptor-related protein complex 3, mu 2 subunit                                                             | AP3M2                            | 0,88 |
| shisa family member 6                                                                                       | SHISA6                           | 0,88 |
| MAM domain containing glycosylphosphatidylinositol anchor 1                                                 | MDGA1                            | 0,88 |
| Down syndrome critical region 4                                                                             | DSCR4                            | 0,88 |
| meiosis 1 associated protein                                                                                | M1AP                             | 0,88 |
| proline-rich transmembrane protein 3                                                                        | PRRT3                            | 0,88 |
| claudin 10                                                                                                  | CLDN10                           | 0,88 |
| testis specific 10 interacting protein                                                                      | TSGA10IP                         | 0,88 |
| ALG1, chitobiosyldiphosphodolichol beta-mannosyltransferase-like                                            | ALG1L                            | 0,88 |
| insulin receptor-related receptor                                                                           | INSRR                            | 0,88 |
| cytochrome c oxidase subunit Vb                                                                             | COX5B                            | 0,88 |
| ribonuclease, RNase A family, 13 (non-active)                                                               | RNASE13                          | 0,88 |
| small nuclear ribonucleoprotein, U11/U12 25kDa subunit                                                      | SNRNP25                          | 0,88 |
| fibulin 7                                                                                                   | FBLN7                            | 0,88 |
| nucleolar protein 4-like                                                                                    | NOL4L                            | 0,88 |
| Memczak2013 ALT_ACCEPTOR, ALT_DONOR, coding, INTERNAL, intronic best transcript NM_173683; novel transcript | AF131215.3; XKR6                 | 0,88 |
| zinc finger protein 628                                                                                     | ZNF628                           | 0,88 |
| ring finger and CCCH-type domains 1                                                                         | RC3H1                            | 0,88 |
| glial cells missing homolog 1 (Drosophila)                                                                  | GCM1                             | 0,88 |
| peptidylprolyl isomerase A (cyclophilin A)-like 4G                                                          | PPIAL4G                          | 0,88 |
| testis highly expressed protein 5; novel transcript; Transcript Identified by AceView                       | THEG5;<br>AC011525.4;<br>pleysey | 0,88 |
| paired related homeobox 1                                                                                   | PRRX1                            | 0,88 |
| chloride channel, voltage-sensitive Ka                                                                      | CLCNKA                           | 0,88 |
| TGF-beta activated kinase 1/MAP3K7 binding protein 3                                                        | TAB3                             | 0,88 |

|                                                                                       |                       |      |
|---------------------------------------------------------------------------------------|-----------------------|------|
| fibrosin-like 1                                                                       | FBRSL1                | 0,88 |
| olfactory receptor, family 6, subfamily N, member 2                                   | OR6N2                 | 0,88 |
| ATPase, H <sup>+</sup> transporting, lysosomal accessory protein 2                    | ATP6AP2               | 0,88 |
| MT-RNR2-like 10                                                                       | MTRNR2L10             | 0,88 |
| tripartite motif containing 45                                                        | TRIM45                | 0,88 |
| submaxillary gland androgen regulated protein 3B                                      | SMR3B                 | 0,88 |
| nyctalopin                                                                            | NYX                   | 0,88 |
| centrosomal protein 295kDa                                                            | CEP295                | 0,88 |
| forkhead box L1-like; novel transcript; Transcript Identified by AceView              | WI2-2373I1.2; pajoyby | 0,88 |
| R3H domain containing 2                                                               | R3HDM2                | 0,88 |
| Transcript Identified by AceView, Entrez Gene ID(s) 5825                              | ABCD3                 | 0,88 |
| neuroligin 3                                                                          | NLGN3                 | 0,88 |
| URB1 ribosome biogenesis 1 homolog (S. cerevisiae)                                    | URB1                  | 0,88 |
| regulatory factor X-associated ankyrin-containing protein                             | RFXANK                | 0,88 |
| ferritin mitochondrial                                                                | FTMT                  | 0,88 |
| platelet derived growth factor D                                                      | PDGFD                 | 0,88 |
| epithelial mitogen                                                                    | EPGN                  | 0,88 |
| prostaglandin-endoperoxide synthase 2 (prostaglandin G/H synthase and cyclooxygenase) | PTGS2                 | 0,88 |
| transmembrane protein 14A                                                             | TMEM14A               | 0,88 |
| MAGE family member A12; CSAG family, member 4 (pseudogene)                            | MAGEA12; CSAG4        | 0,88 |
| hydroletharus syndrome 1                                                              | HYLS1                 | 0,88 |
| succinate-CoA ligase, GDP-forming, beta subunit                                       | SUCLG2                | 0,88 |
| baculoviral IAP repeat containing 8                                                   | BIRC8                 | 0,88 |
| ret finger protein-like 1                                                             | RFPL1                 | 0,88 |
| phosphatidylinositol glycan anchor biosynthesis class L                               | PIGL                  | 0,88 |
| gamma-aminobutyric acid (GABA) A receptor, rho 2                                      | GABRR2                | 0,88 |
| hyaluronan-mediated motility receptor (RHAMM)                                         | HMMR                  | 0,88 |
| S-antigen; retina and pineal gland (arrestin)                                         | SAG                   | 0,88 |
| olfactory receptor, family 4, subfamily L, member 1                                   | OR4L1                 | 0,88 |
| glycyl-tRNA synthetase                                                                | GARS                  | 0,88 |
| family with sequence similarity 71, member A                                          | FAM71A                | 0,88 |
| F-box protein 2                                                                       | FBXO2                 | 0,88 |
| DIS3 homolog, exosome endoribonuclease and 3-5 exoribonuclease                        | DIS3                  | 0,88 |
| MAGE family member B1; MAGE family member B4                                          | MAGEB1; MAGEB4        | 0,88 |
| KRIT1, ankyrin repeat containing                                                      | KRIT1                 | 0,88 |
| HIG1 hypoxia inducible domain family, member 1C                                       | HIGD1C                | 0,88 |
| scinderin                                                                             | SCIN                  | 0,88 |
| olfactory receptor, family 5, subfamily L, member 2                                   | OR5L2                 | 0,88 |

|                                                                                        |               |      |
|----------------------------------------------------------------------------------------|---------------|------|
| hypoxia up-regulated 1                                                                 | HYOU1         | 0,88 |
| CD1e molecule                                                                          | CD1E          | 0,88 |
| Transcript Identified by AceView, Entrez Gene ID(s) 23122                              | CLASP2        | 0,88 |
| CD248 molecule, endosialin                                                             | CD248         | 0,88 |
| homeobox A6                                                                            | HOXA6         | 0,88 |
| family with sequence similarity 69, member C                                           | FAM69C        | 0,88 |
| ankyrin 1, erythrocytic                                                                | ANK1          | 0,88 |
| Fc fragment of IgE, high affinity I, receptor for; alpha polypeptide                   | FCER1A        | 0,88 |
| Transcript Identified by AceView, Entrez Gene ID(s) 93624                              | TADA2B        | 0,88 |
| Jeck2013 ALT_ACCEPTOR, ALT_DONOR, coding, INTERNAL, intronic best transcript NM_015049 | TRAK2         | 0,88 |
| fat mass and obesity associated                                                        | FTO           | 0,88 |
| Jeck2013 ALT_ACCEPTOR, ALT_DONOR, coding, INTERNAL, intronic best transcript NM_006042 | HS3ST3A1      | 0,88 |
| autocrine motility factor receptor, E3 ubiquitin protein ligase                        | AMFR          | 0,88 |
| lymphocyte cytosolic protein 2                                                         | LCP2          | 0,88 |
| adenosine deaminase, tRNA-specific 2                                                   | ADAT2         | 0,88 |
| long intergenic non-protein coding RNA 1342                                            | LINC01342     | 0,88 |
| cell division cycle 6                                                                  | CDC6          | 0,88 |
| ring finger and SPRY domain containing 1                                               | RSPRY1        | 0,88 |
| leucine zipper, putative tumor suppressor 1                                            | LZTS1         | 0,88 |
| olfactory receptor, family 10, subfamily H, member 5                                   | OR10H5        | 0,88 |
| C9orf135 antisense RNA 1 (head to head)                                                | C9orf135-AS1  | 0,88 |
| zinc finger protein 862                                                                | ZNF862        | 0,88 |
| collagen, type VIII, alpha 2                                                           | COL8A2        | 0,88 |
| arginine-glutamic acid dipeptide (RE) repeats                                          | RERE          | 0,88 |
| Jeck2013 ALT_DONOR, coding, INTERNAL, intronic best transcript NM_004515               | ILF2          | 0,88 |
| increased sodium tolerance 1 homolog (yeast)                                           | IST1          | 0,88 |
| deafness, autosomal recessive 31                                                       | DFNB31        | 0,88 |
| olfactory receptor, family 56, subfamily A, member 3                                   | OR56A3        | 0,88 |
| ectonucleoside triphosphate diphosphohydrolase 4; lysyl oxidase-like 2                 | ENTPD4; LOXL2 | 0,88 |
| homeobox B6                                                                            | HOXB6         | 0,88 |
| DEAD (Asp-Glu-Ala-Asp) box polypeptide 60-like                                         | DDX60L        | 0,88 |
| elastase, neutrophil expressed                                                         | ELANE         | 0,88 |
| NADPH oxidase 4                                                                        | NOX4          | 0,88 |
| SH3 and multiple ankyrin repeat domains 1                                              | SHANK1        | 0,88 |
| cytochrome P450, family 4, subfamily F, polypeptide 22                                 | CYP4F22       | 0,88 |
| WDYHV motif containing 1                                                               | WDYHV1        | 0,88 |

|                                                                                                                             |                         |      |
|-----------------------------------------------------------------------------------------------------------------------------|-------------------------|------|
| spastic paraplegia 7 (pure and complicated autosomal recessive)                                                             | SPG7                    | 0,88 |
| erythrocyte membrane protein band 4.2                                                                                       | EPB42                   | 0,88 |
| fucosyltransferase 10 (alpha (1,3) fucosyltransferase)                                                                      | FUT10                   | 0,88 |
| glutathione peroxidase 6                                                                                                    | GPX6                    | 0,88 |
| Transcript Identified by AceView, Entrez Gene ID(s) 108                                                                     | ADCY2                   | 0,88 |
| peptidyl arginine deiminase, type I                                                                                         | PADI1                   | 0,88 |
| 5-azacytidine induced 2                                                                                                     | AZI2                    | 0,88 |
| contactin associated protein-like 5                                                                                         | CNTNAP5                 | 0,88 |
| hedgehog acyltransferase                                                                                                    | HHAT                    | 0,88 |
| podocalyxin-like 2                                                                                                          | PODXL2                  | 0,88 |
| abhydrolase domain containing 17C                                                                                           | ABHD17C                 | 0,88 |
| nucleoredoxin-like 2                                                                                                        | NXNL2                   | 0,88 |
| AT rich interactive domain 1B (SWI1-like)                                                                                   | ARID1B                  | 0,88 |
| potassium channel, voltage gated modifier subfamily V, member 2                                                             | KCNV2                   | 0,88 |
| fibroblast growth factor 7                                                                                                  | FGF7                    | 0,88 |
| sodium channel, voltage gated, type V alpha subunit                                                                         | SCN5A                   | 0,88 |
| polymerase (DNA directed), delta 2, accessory subunit                                                                       | POLD2                   | 0,88 |
| chromosome 9 open reading frame 172                                                                                         | C9orf172                | 0,88 |
| myeloid-derived growth factor                                                                                               | MYDGF                   | 0,88 |
| apoptosis-associated tyrosine kinase                                                                                        | AATK                    | 0,88 |
| olfactory receptor, family 51, subfamily B, member 4                                                                        | OR51B4                  | 0,88 |
| serum response factor                                                                                                       | SRF                     | 0,88 |
| regulator of G protein signaling 9 binding protein                                                                          | RGS9BP                  | 0,88 |
| neurofascin                                                                                                                 | NFASC                   | 0,88 |
| golgin A1                                                                                                                   | GOLGA1                  | 0,88 |
| stromal interaction molecule 2                                                                                              | STIM2                   | 0,88 |
| novel transcript; olfactory receptor, family 5, subfamily H, member 8 (gene/pseudogene) [Source:HGNC Symbol;Acc:HGNC:14773] | RP11-325B23.2;<br>OR5H8 | 0,88 |
| p53-induced death domain protein 1                                                                                          | PIDD1                   | 0,87 |
| microRNA 6809; tensin 1                                                                                                     | MIR6809; TNS1           | 0,87 |
| DDB1 and CUL4 associated factor 16                                                                                          | DCAF16                  | 0,87 |
| olfactory receptor, family 5, subfamily B, member 2                                                                         | OR5B2                   | 0,87 |
| Rho guanine nucleotide exchange factor 1                                                                                    | ARHGEF1                 | 0,87 |
| 2-aminoethanethiol (cysteamine) dioxygenase                                                                                 | ADO                     | 0,87 |
| gap junction protein delta 4                                                                                                | GJD4                    | 0,87 |
| siah E3 ubiquitin protein ligase family member 3                                                                            | SIAH3                   | 0,87 |
| novel transcript; Transcript Identified by AceView, Entrez Gene ID(s) 8559; RP11-295P9.3 (from geneSymbol)                  | RP11-295P9.3;<br>PRPF18 | 0,87 |
| fatty acid binding protein 7, brain                                                                                         | FABP7                   | 0,87 |
| structural maintenance of chromosomes 6                                                                                     | SMC6                    | 0,87 |
| BTB (POZ) domain containing 7                                                                                               | BTBD7                   | 0,87 |

|                                                                                                                                                                                                                                                                                                                                                                                                                                                                                                                                                                                                                                                                                                                                                                                                                                                        |                                                                              |      |
|--------------------------------------------------------------------------------------------------------------------------------------------------------------------------------------------------------------------------------------------------------------------------------------------------------------------------------------------------------------------------------------------------------------------------------------------------------------------------------------------------------------------------------------------------------------------------------------------------------------------------------------------------------------------------------------------------------------------------------------------------------------------------------------------------------------------------------------------------------|------------------------------------------------------------------------------|------|
| nucleoporin like 2                                                                                                                                                                                                                                                                                                                                                                                                                                                                                                                                                                                                                                                                                                                                                                                                                                     | NUPL2                                                                        | 0,87 |
| ADAM metalloproteinase domain 20                                                                                                                                                                                                                                                                                                                                                                                                                                                                                                                                                                                                                                                                                                                                                                                                                       | ADAM20                                                                       | 0,87 |
| zinc finger protein 593                                                                                                                                                                                                                                                                                                                                                                                                                                                                                                                                                                                                                                                                                                                                                                                                                                | ZNF593                                                                       | 0,87 |
| TP53 target 3B                                                                                                                                                                                                                                                                                                                                                                                                                                                                                                                                                                                                                                                                                                                                                                                                                                         | TP53TG3B                                                                     | 0,87 |
| Homo sapiens TP53 target 3B (TP53TG3B), transcript variant 1, mRNA.; Homo sapiens TP53 target 3C (TP53TG3C), transcript variant 1, mRNA.; Homo sapiens TP53 target 3 (TP53TG3), transcript variant 1, mRNA.; Homo sapiens TP53 target 3 (TP53TG3), transcript variant 3, non-coding RNA.; Homo sapiens TP53 target 3B (TP53TG3B), transcript variant 3, non-coding RNA.; Homo sapiens TP53 target 3 (TP53TG3), transcript variant 4, non-coding RNA.; Homo sapiens TP53 target 3C (TP53TG3C), transcript variant 3, non-coding RNA.; TP53-target gene 3 protein; Homo sapiens TP53 target 3, mRNA (cDNA clone MGC:119889 IMAGE:40015196), complete cds.; Homo sapiens TP53 target 3, mRNA (cDNA clone MGC:119888 IMAGE:40015195), complete cds.; TP53-target gene 3 protein [Source:UniProtKB/Swiss-Prot;Acc:Q9ULZ0]                                   | TP53TG3B;<br>TP53TG3C;<br>TP53TG3;<br>LOC102723655;<br>RP11-23E10.6          | 0,87 |
| Homo sapiens TP53 target 3B (TP53TG3B), transcript variant 1, mRNA.; Homo sapiens TP53 target 3C (TP53TG3C), transcript variant 1, mRNA.; Homo sapiens TP53 target 3 (TP53TG3), transcript variant 1, mRNA.; Homo sapiens TP53 target 3 (TP53TG3), transcript variant 3, non-coding RNA.; Homo sapiens TP53 target 3B (TP53TG3B), transcript variant 3, non-coding RNA.; Homo sapiens TP53 target 3 (TP53TG3), transcript variant 4, non-coding RNA.; Homo sapiens TP53 target 3C (TP53TG3C), transcript variant 3, non-coding RNA.; TP53-target gene 3 protein; Homo sapiens TP53 target 3, mRNA (cDNA clone MGC:119889 IMAGE:40015196), complete cds.; Homo sapiens TP53 target 3, mRNA (cDNA clone MGC:119888 IMAGE:40015195), complete cds.; Transcript Identified by AceView; TP53-target gene 3 protein [Source:UniProtKB/Swiss-Prot;Acc:Q9ULZ0] | TP53TG3B;<br>TP53TG3C;<br>TP53TG3;<br>LOC102723655;<br>hotema; RP11-1277H1.5 | 0,87 |
| acyl-CoA synthetase medium-chain family member 4                                                                                                                                                                                                                                                                                                                                                                                                                                                                                                                                                                                                                                                                                                                                                                                                       | ACSM4                                                                        | 0,87 |
| heterogeneous nuclear ribonucleoprotein C-like 3;<br>heterogeneous nuclear ribonucleoprotein C-like 4                                                                                                                                                                                                                                                                                                                                                                                                                                                                                                                                                                                                                                                                                                                                                  | HNRNPCL3;<br>HNRNPCL4                                                        | 0,87 |
| zinc finger protein 586                                                                                                                                                                                                                                                                                                                                                                                                                                                                                                                                                                                                                                                                                                                                                                                                                                | ZNF586                                                                       | 0,87 |
| G protein-coupled receptor 101                                                                                                                                                                                                                                                                                                                                                                                                                                                                                                                                                                                                                                                                                                                                                                                                                         | GPR101                                                                       | 0,87 |
| Zhang2013 ALT_DONOR, coding, INTERNAL, intronic best transcript NM_007184                                                                                                                                                                                                                                                                                                                                                                                                                                                                                                                                                                                                                                                                                                                                                                              | NISCH                                                                        | 0,87 |
| WD repeat domain 35                                                                                                                                                                                                                                                                                                                                                                                                                                                                                                                                                                                                                                                                                                                                                                                                                                    | WDR35                                                                        | 0,87 |
| tau tubulin kinase 2                                                                                                                                                                                                                                                                                                                                                                                                                                                                                                                                                                                                                                                                                                                                                                                                                                   | TTBK2                                                                        | 0,87 |



|                                                                                  |                    |      |
|----------------------------------------------------------------------------------|--------------------|------|
| transcription elongation factor A (SII) N-terminal and central domain containing | TCEANC             | 0,87 |
| solute carrier family 6, member 16                                               | SLC6A16            | 0,87 |
| zinc finger protein 573                                                          | ZNF573             | 0,87 |
| platelet derived growth factor C                                                 | PDGFC              | 0,87 |
| ficolin (collagen/fibrinogen domain containing) 1                                | FCN1               | 0,87 |
| zinc finger protein 764                                                          | ZNF764             | 0,87 |
| neuropeptide Y                                                                   | NPY                | 0,87 |
| solute carrier family 10 (sodium/bile acid cotransporter), member 6              | SLC10A6            | 0,87 |
| olfactory receptor, family 5, subfamily D, member 16                             | OR5D16             | 0,87 |
| solute carrier family 15 (oligopeptide transporter), member 2                    | SLC15A2            | 0,87 |
| palmelphin                                                                       | PALMD              | 0,87 |
| BCL2-like 14 (apoptosis facilitator)                                             | BCL2L14            | 0,87 |
| Wiskott-Aldrich syndrome                                                         | WAS                | 0,87 |
| StAR-related lipid transfer domain containing 9                                  | STARD9             | 0,87 |
| family with sequence similarity 174, member B                                    | FAM174B            | 0,87 |
| retinoid X receptor gamma                                                        | RXRG               | 0,87 |
| forkhead box N1                                                                  | FOXN1              | 0,87 |
| spermidine synthase                                                              | SRM                | 0,87 |
| TBC1 domain family, member 3 pseudogene 5                                        | TBC1D3P5           | 0,87 |
| MAN1B1 antisense RNA 1 (head to head)                                            | MAN1B1-AS1         | 0,87 |
| pleckstrin homology domain containing, family A member 5                         | PLEKHA5            | 0,87 |
| ATP synthase, H <sup>+</sup> transporting, mitochondrial F1 complex, O subunit   | ATP5O              | 0,87 |
| tetratricopeptide repeat domain 23-like                                          | TTC23L             | 0,87 |
| progesterin and adipoQ receptor family member IV                                 | PAQR4              | 0,87 |
| MAGI family member, X-linked                                                     | MAGIX              | 0,87 |
| transglutaminase 4                                                               | TGM4               | 0,87 |
| proteasome subunit alpha 8                                                       | PSMA8              | 0,87 |
| coiled-coil domain containing 148                                                | CCDC148            | 0,87 |
| cell wall biogenesis 43 C-terminal homolog                                       | CWH43              | 0,87 |
| sidekick cell adhesion molecule 1                                                | SDK1               | 0,87 |
| amylase, alpha 2A (pancreatic)                                                   | AMY2A              | 0,87 |
| nuclear protein, ataxia-telangiectasia locus                                     | NPAT               | 0,87 |
| SPATA31 subfamily A, member 3                                                    | SPATA31A3          | 0,87 |
| general transcription factor IIH subunit 4                                       | GTF2H4             | 0,87 |
| kinesin family member 15                                                         | KIF15              | 0,87 |
| keratin associated protein 10-3                                                  | KRTAP10-3          | 0,87 |
| Transcript Identified by AceView, Entrez Gene ID(s) 4345; novel transcript       | CD200; RP11-90K6.1 | 0,87 |
| NCK adaptor protein 1                                                            | NCK1               | 0,87 |
| perilipin 2                                                                      | PLIN2              | 0,87 |

|                                                                                                           |                             |      |
|-----------------------------------------------------------------------------------------------------------|-----------------------------|------|
| serine-rich and transmembrane domain containing 1                                                         | SERTM1                      | 0,87 |
| discs, large (Drosophila) homolog-associated protein 1                                                    | DLGAP1                      | 0,87 |
| pregnancy up-regulated nonubiquitous CaM kinase                                                           | PNCK                        | 0,87 |
| derlin 3                                                                                                  | DERL3                       | 0,87 |
| SIGLEC family like 1                                                                                      | SIGLECL1                    | 0,87 |
| complement component 1, q subcomponent-like 3                                                             | C1QL3                       | 0,87 |
| xylosyltransferase II                                                                                     | XYLT2                       | 0,87 |
| RPL17-C18orf32 readthrough                                                                                | RPL17-C18orf32              | 0,87 |
| glutamyl-prolyl-tRNA synthetase                                                                           | EPRS                        | 0,87 |
| chromosome 1 open reading frame 43                                                                        | C1orf43                     | 0,87 |
| dihydropyrimidinase                                                                                       | DPYS                        | 0,87 |
| Zhang2013 ALT_ACCEPTOR, ALT_DONOR, coding, INTERNAL, intronic best transcript NM_002520                   | NPM1                        | 0,87 |
| chromosome 6 open reading frame 62                                                                        | C6orf62                     | 0,87 |
| clusterin; microRNA 6843                                                                                  | CLU; MIR6843                | 0,87 |
| adhesion G protein-coupled receptor F5                                                                    | ADGRF5                      | 0,87 |
| ribosomal protein L39-like                                                                                | RPL39L                      | 0,87 |
| proline rich 23C                                                                                          | PRR23C                      | 0,87 |
| serum amyloid A1                                                                                          | SAA1                        | 0,87 |
| TatD DNase domain containing 2; ghrelin opposite strand/antisense RNA                                     | TATDN2; GHRLOS              | 0,87 |
| chondroitin sulfate synthase 3                                                                            | CHSY3                       | 0,87 |
| tigger transposable element derived 2                                                                     | TIGD2                       | 0,87 |
| 5-nucleotidase, cytosolic IB; NT5C1B-RDH14 readthrough; retinol dehydrogenase 14 (all-trans/9-cis/11-cis) | NT5C1B; NT5C1B-RDH14; RDH14 | 0,87 |
| cleavage stimulation factor, 3 pre-RNA, subunit 1                                                         | CSTF1                       | 0,87 |
| diacylglycerol kinase theta                                                                               | DGKQ                        | 0,87 |
| Zhang2013 ALT_ACCEPTOR, ALT_DONOR, coding, INTERNAL, intronic best transcript NM_003934                   | FUBP3                       | 0,87 |
| eukaryotic translation initiation factor 4 gamma, 2; small nucleolar RNA, C/D box 97                      | EIF4G2; SNORD97             | 0,87 |
| transmembrane protein 132B                                                                                | TMEM132B                    | 0,87 |
| Transcript Identified by AceView, Entrez Gene ID(s) 10915                                                 | TCERG1                      | 0,87 |
| eukaryotic translation initiation factor 2-alpha kinase 1                                                 | EIF2AK1                     | 0,87 |
| epididymal protein 3A                                                                                     | EDDM3A                      | 0,87 |
| inositol polyphosphate-5-phosphatase D                                                                    | INPP5D                      | 0,87 |
| basic transcription factor 3                                                                              | BTF3                        | 0,87 |
| dual specificity tyrosine-(Y)-phosphorylation regulated kinase 1B                                         | DYRK1B                      | 0,87 |
| collectin sub-family member 10 (C-type lectin)                                                            | COLEC10                     | 0,87 |
| fragile site, folic acid type, rare, fra(10)(q23.3) or fra(10)(q24.2) candidate 1                         | FRA10AC1                    | 0,87 |
| lysyl oxidase-like 3                                                                                      | LOXL3                       | 0,87 |

|                                                                                                                                                                                                                                                                                                                                                                                                                                                                                                                                                                                                                                                                                                                                                                                                                                                                                                                 |                                                                                                                        |      |
|-----------------------------------------------------------------------------------------------------------------------------------------------------------------------------------------------------------------------------------------------------------------------------------------------------------------------------------------------------------------------------------------------------------------------------------------------------------------------------------------------------------------------------------------------------------------------------------------------------------------------------------------------------------------------------------------------------------------------------------------------------------------------------------------------------------------------------------------------------------------------------------------------------------------|------------------------------------------------------------------------------------------------------------------------|------|
| MLX interacting protein                                                                                                                                                                                                                                                                                                                                                                                                                                                                                                                                                                                                                                                                                                                                                                                                                                                                                         | MLXIP                                                                                                                  | 0,87 |
| myosin, heavy chain 2, skeletal muscle, adult                                                                                                                                                                                                                                                                                                                                                                                                                                                                                                                                                                                                                                                                                                                                                                                                                                                                   | MYH2                                                                                                                   | 0,87 |
| sperm associated antigen 6                                                                                                                                                                                                                                                                                                                                                                                                                                                                                                                                                                                                                                                                                                                                                                                                                                                                                      | SPAG6                                                                                                                  | 0,87 |
| glucagon receptor                                                                                                                                                                                                                                                                                                                                                                                                                                                                                                                                                                                                                                                                                                                                                                                                                                                                                               | GCGR                                                                                                                   | 0,87 |
| zinc finger protein 292                                                                                                                                                                                                                                                                                                                                                                                                                                                                                                                                                                                                                                                                                                                                                                                                                                                                                         | ZNF292                                                                                                                 | 0,87 |
| L-3-hydroxyproline dehydratase (trans-)                                                                                                                                                                                                                                                                                                                                                                                                                                                                                                                                                                                                                                                                                                                                                                                                                                                                         | L3HYPDH                                                                                                                | 0,87 |
| pleckstrin homology domain containing, family A (phosphoinositide binding specific) member 1                                                                                                                                                                                                                                                                                                                                                                                                                                                                                                                                                                                                                                                                                                                                                                                                                    | PLEKHA1                                                                                                                | 0,87 |
| SMAD family member 4                                                                                                                                                                                                                                                                                                                                                                                                                                                                                                                                                                                                                                                                                                                                                                                                                                                                                            | SMAD4                                                                                                                  | 0,87 |
| phosphopantothenoylcysteine synthetase; coiled-coil domain containing 30                                                                                                                                                                                                                                                                                                                                                                                                                                                                                                                                                                                                                                                                                                                                                                                                                                        | PPCS; CCDC30                                                                                                           | 0,87 |
| S-antigen; retina and pineal gland (arrestin)                                                                                                                                                                                                                                                                                                                                                                                                                                                                                                                                                                                                                                                                                                                                                                                                                                                                   | SAG                                                                                                                    | 0,87 |
| lin-52 DREAM MuvB core complex component                                                                                                                                                                                                                                                                                                                                                                                                                                                                                                                                                                                                                                                                                                                                                                                                                                                                        | LIN52                                                                                                                  | 0,87 |
| N(alpha)-acetyltransferase 10, NatA catalytic subunit                                                                                                                                                                                                                                                                                                                                                                                                                                                                                                                                                                                                                                                                                                                                                                                                                                                           | NAA10                                                                                                                  | 0,87 |
| uncoupling protein 1 (mitochondrial, proton carrier)                                                                                                                                                                                                                                                                                                                                                                                                                                                                                                                                                                                                                                                                                                                                                                                                                                                            | UCP1                                                                                                                   | 0,87 |
| ADP-ribosylation factor guanine nucleotide-exchange factor 2 (brefeldin A-inhibited)                                                                                                                                                                                                                                                                                                                                                                                                                                                                                                                                                                                                                                                                                                                                                                                                                            | ARFGEF2                                                                                                                | 0,87 |
| zinc finger CCCH-type containing 8                                                                                                                                                                                                                                                                                                                                                                                                                                                                                                                                                                                                                                                                                                                                                                                                                                                                              | ZC3H8                                                                                                                  | 0,87 |
| olfactory receptor, family 5, subfamily A, member 2                                                                                                                                                                                                                                                                                                                                                                                                                                                                                                                                                                                                                                                                                                                                                                                                                                                             | OR5A2                                                                                                                  | 0,87 |
| protease, serine 45                                                                                                                                                                                                                                                                                                                                                                                                                                                                                                                                                                                                                                                                                                                                                                                                                                                                                             | PRSS45                                                                                                                 | 0,87 |
| proline-serine-threonine phosphatase interacting protein 1                                                                                                                                                                                                                                                                                                                                                                                                                                                                                                                                                                                                                                                                                                                                                                                                                                                      | PSTPIP1                                                                                                                | 0,87 |
| chromosome 1 open reading frame 112                                                                                                                                                                                                                                                                                                                                                                                                                                                                                                                                                                                                                                                                                                                                                                                                                                                                             | C1orf112                                                                                                               | 0,87 |
| cell adhesion molecule 3                                                                                                                                                                                                                                                                                                                                                                                                                                                                                                                                                                                                                                                                                                                                                                                                                                                                                        | CADM3                                                                                                                  | 0,87 |
| early B-cell factor 4                                                                                                                                                                                                                                                                                                                                                                                                                                                                                                                                                                                                                                                                                                                                                                                                                                                                                           | EBF4                                                                                                                   | 0,87 |
| lysine (K)-specific demethylase 2B                                                                                                                                                                                                                                                                                                                                                                                                                                                                                                                                                                                                                                                                                                                                                                                                                                                                              | KDM2B                                                                                                                  | 0,87 |
| glutathione S-transferase mu 2 (muscle)                                                                                                                                                                                                                                                                                                                                                                                                                                                                                                                                                                                                                                                                                                                                                                                                                                                                         | GSTM2                                                                                                                  | 0,87 |
| killer cell immunoglobulin-like receptor, two domains, short cytoplasmic tail, 5; killer cell immunoglobulin-like receptor, three domains, long cytoplasmic tail, 2; killer cell immunoglobulin-like receptor, two domains, long cytoplasmic tail, 1; killer cell immunoglobulin-like receptor, three domains, long cytoplasmic tail, 3; killer cell immunoglobulin-like receptor, three domains, long cytoplasmic tail, 1; killer cell immunoglobulin-like receptor, two domains, short cytoplasmic tail, 4; killer cell immunoglobulin-like receptor, two domains, long cytoplasmic tail, 3; killer cell immunoglobulin-like receptor, three domains, short cytoplasmic tail, 1; killer cell immunoglobulin-like receptor, two domains, short cytoplasmic tail, 2; killer cell immunoglobulin-like receptor, two domains, pseudogene 1; killer cell immunoglobulin-like receptor, three domains, pseudogene 1 | KIR2DS5;<br>KIR3DL2; KIR2DL1;<br>KIR3DL3; KIR3DL1;<br>KIR2DS4;<br>KIR2DL3;<br>KIR3DS1;<br>KIR2DS2;<br>KIR2DP1; KIR3DP1 | 0,87 |
| olfactomedin 3                                                                                                                                                                                                                                                                                                                                                                                                                                                                                                                                                                                                                                                                                                                                                                                                                                                                                                  | OLFM3                                                                                                                  | 0,87 |

|                                                                                                      |                        |      |
|------------------------------------------------------------------------------------------------------|------------------------|------|
| long intergenic non-protein coding RNA 550                                                           | LINC00550              | 0,87 |
| fibroblast growth factor (acidic) intracellular binding protein                                      | FIBP                   | 0,87 |
| CASK interacting protein 1                                                                           | CASKIN1                | 0,87 |
| cadherin 6, type 2, K-cadherin (fetal kidney)                                                        | CDH6                   | 0,87 |
| transporter 2, ATP-binding cassette, sub-family B (MDR/TAP)                                          | TAP2                   | 0,87 |
| GM2 ganglioside activator                                                                            | GM2A                   | 0,87 |
| Jeck2013 ALT_DONOR, coding, INTERNAL, intronic best transcript NM_032134                             | QRICH2                 | 0,87 |
| gem nuclear organelle associated protein 4                                                           | GEMIN4                 | 0,87 |
| guanylate cyclase 1, soluble, alpha 2                                                                | GUCY1A2                | 0,87 |
| protein kinase C, delta binding protein                                                              | PRKCDBP                | 0,87 |
| nudix hydrolase 13                                                                                   | NUDT13                 | 0,87 |
| dual specificity phosphatase 21                                                                      | DUSP21                 | 0,87 |
| purinergic receptor P2Y, G-protein coupled, 10                                                       | P2RY10                 | 0,87 |
| B9 protein domain 2                                                                                  | B9D2                   | 0,87 |
| SON DNA binding protein; microRNA 6501                                                               | SON; MIR6501           | 0,87 |
| decapping exoribonuclease                                                                            | DXO                    | 0,87 |
| defensin, beta 104A; defensin, beta 104B                                                             | DEFB104A;<br>DEFB104B  | 0,87 |
| solute carrier family 11 (proton-coupled divalent metal ion transporter), member 1                   | SLC11A1                | 0,87 |
| guanine nucleotide binding protein, alpha transducing 3                                              | GNAT3                  | 0,87 |
| Jeck2013 ALT_ACCEPTOR, ALT_DONOR, coding, INTERNAL, intronic best transcript NM_005119               | THRAP3                 | 0,87 |
| solute carrier family 25 (mitochondrial iron transporter), member 28                                 | SLC25A28               | 0,87 |
| bestrophin 2                                                                                         | BEST2                  | 0,87 |
| SR-related CTD-associated factor 8; T-cell lymphoma invasion and metastasis 2                        | SCAF8; TIAM2           | 0,87 |
| SPANX family, member N4                                                                              | SPANXN4                | 0,87 |
| phosphatidylinositol 4-kinase, catalytic, alpha                                                      | PI4KA                  | 0,87 |
| potassium channel tetramerization domain containing 20                                               | KCTD20                 | 0,87 |
| tubulin polymerization-promoting protein family member 3                                             | TPPP3                  | 0,87 |
| necdin, MAGE family member                                                                           | NDN                    | 0,87 |
| netrin 5                                                                                             | NTN5                   | 0,87 |
| KIRREL3 antisense RNA 3                                                                              | KIRREL3-AS3            | 0,87 |
| ADP-ribosylation factor like GTPase 6 interacting protein 1                                          | ARL6IP1                | 0,87 |
| olfactory receptor, family 51, subfamily A, member 4                                                 | OR51A4                 | 0,87 |
| novel transcript, sense overlapping TTC17; Transcript Identified by AceView, Entrez Gene ID(s) 55761 | RP11-484D2.4;<br>TTC17 | 0,87 |

|                                                                                                                                                                                                                                                                                                                  |                                                            |      |
|------------------------------------------------------------------------------------------------------------------------------------------------------------------------------------------------------------------------------------------------------------------------------------------------------------------|------------------------------------------------------------|------|
| solute carrier family 25, member 53                                                                                                                                                                                                                                                                              | SLC25A53                                                   | 0,87 |
| ST8 alpha-N-acetyl-neuraminide alpha-2,8-sialyltransferase 3                                                                                                                                                                                                                                                     | ST8SIA3                                                    | 0,87 |
| intermediate filament family orphan 1                                                                                                                                                                                                                                                                            | IFFO1                                                      | 0,87 |
| D site of albumin promoter (albumin D-box) binding protein                                                                                                                                                                                                                                                       | DBP                                                        | 0,87 |
| thymosin beta 15B                                                                                                                                                                                                                                                                                                | TMSB15B                                                    | 0,87 |
| M-phase phosphoprotein 9                                                                                                                                                                                                                                                                                         | MPHOSPH9                                                   | 0,87 |
| tubulin folding cofactor A                                                                                                                                                                                                                                                                                       | TBCA                                                       | 0,87 |
| protein serine kinase H2                                                                                                                                                                                                                                                                                         | PSKH2                                                      | 0,87 |
| zinc finger protein 74                                                                                                                                                                                                                                                                                           | ZNF74                                                      | 0,87 |
| solute carrier family 9, subfamily A (NHE4, cation proton antiporter 4), member 4                                                                                                                                                                                                                                | SLC9A4                                                     | 0,87 |
| FPGT-TNNI3K readthrough; fucose-1-phosphate guanylyltransferase                                                                                                                                                                                                                                                  | FPGT-TNNI3K; FPGT                                          | 0,87 |
| transmembrane protein 225-like; Jeck2013 ALT_ACCEPTOR, ALT_DONOR, ncRNA, OVCODE, OVEXON, upstream_start best transcript TCONS_I2_00026125; Salzman2013 ANNOTATED, INTERNAL, ncRNA, OVCODE, OVEXON best transcript TCONS_I2_00026126; novel transcript; Transcript Identified by AceView, Entrez Gene ID(s) 79027 | GS1-259H13.2; TCONS_I2_00026125; TCONS_I2_00026126; ZNF655 | 0,87 |
| GTP binding protein 1                                                                                                                                                                                                                                                                                            | GTPBP1                                                     | 0,87 |
| Memczak2013 ANTISENSE, coding, INTERNAL, UTR3 best transcript NM_014737                                                                                                                                                                                                                                          | RASSF2                                                     | 0,87 |
| bromodomain adjacent to zinc finger domain 2B                                                                                                                                                                                                                                                                    | BAZ2B                                                      | 0,87 |
| transmembrane channel like 3                                                                                                                                                                                                                                                                                     | TMC3                                                       | 0,87 |
| villin-like                                                                                                                                                                                                                                                                                                      | VILL                                                       | 0,87 |
| olfactory receptor, family 10, subfamily A, member 6 (gene/pseudogene)                                                                                                                                                                                                                                           | OR10A6                                                     | 0,87 |
| THO complex 7                                                                                                                                                                                                                                                                                                    | THOC7                                                      | 0,87 |
| MLX interacting protein                                                                                                                                                                                                                                                                                          | MLXIP                                                      | 0,87 |
| maltase-glucoamylase                                                                                                                                                                                                                                                                                             | MGAM                                                       | 0,87 |
| calcium/calmodulin-dependent protein kinase kinase 1, alpha                                                                                                                                                                                                                                                      | CAMKK1                                                     | 0,87 |
| phospholipase A2, group IVA (cytosolic, calcium-dependent)                                                                                                                                                                                                                                                       | PLA2G4A                                                    | 0,87 |
| family with sequence similarity 169, member B                                                                                                                                                                                                                                                                    | FAM169B                                                    | 0,87 |
| DEAH (Asp-Glu-Ala-His) box polypeptide 29                                                                                                                                                                                                                                                                        | DHX29                                                      | 0,87 |
| YjeF N-terminal domain containing 3                                                                                                                                                                                                                                                                              | YJEFN3                                                     | 0,87 |
| CD164 molecule, sialomucin                                                                                                                                                                                                                                                                                       | CD164                                                      | 0,87 |
| toll interacting protein                                                                                                                                                                                                                                                                                         | TOLLIP                                                     | 0,87 |
| programmed cell death 6                                                                                                                                                                                                                                                                                          | PDCD6                                                      | 0,87 |
| chitinase 1 (chitotriosidase)                                                                                                                                                                                                                                                                                    | CHIT1                                                      | 0,87 |
| N(alpha)-acetyltransferase 25, NatB auxiliary subunit                                                                                                                                                                                                                                                            | NAA25                                                      | 0,87 |

|                                                                                                                          |               |      |
|--------------------------------------------------------------------------------------------------------------------------|---------------|------|
| RAB3A interacting protein                                                                                                | RAB3IP        | 0,87 |
| Jeck2013 ALT_ACCEPTOR, ALT_DONOR, coding, INTERNAL, intronic best transcript NM_000127; Transcript Identified by AceView | EXT1; spawla  | 0,87 |
| cap methyltransferase 1                                                                                                  | CMTR1         | 0,87 |
| calcyphosine 2                                                                                                           | CAPS2         | 0,87 |
| protein inhibitor of activated STAT 2                                                                                    | PIAS2         | 0,87 |
| zona pellucida glycoprotein 1 (sperm receptor)                                                                           | ZP1           | 0,87 |
| grainyhead-like transcription factor 1                                                                                   | GRHL1         | 0,87 |
| lactase                                                                                                                  | LCT           | 0,87 |
| BCL2L2-PABPN1 readthrough                                                                                                | BCL2L2-PABPN1 | 0,87 |
| cyclin-dependent kinase-like 5                                                                                           | CDKL5         | 0,87 |
| transmembrane protein 68                                                                                                 | TMEM68        | 0,87 |
| cell division cycle 5-like                                                                                               | CDC5L         | 0,87 |
| HemK methyltransferase family member 1                                                                                   | HEMK1         | 0,87 |
| ankyrin repeat domain 65                                                                                                 | ANKRD65       | 0,87 |
| pleiotropic regulator 1                                                                                                  | PLRG1         | 0,87 |
| zinc finger protein 645                                                                                                  | ZNF645        | 0,87 |
| ELK4, ETS-domain protein (SRF accessory protein 1)                                                                       | ELK4          | 0,87 |
| TSPY-like 5                                                                                                              | TSPYL5        | 0,87 |
| peptidyl arginine deiminase, type IV                                                                                     | PADI4         | 0,87 |
| UHRF1 binding protein 1-like                                                                                             | UHRF1BP1L     | 0,87 |
| cancer antigen 1                                                                                                         | CAGE1         | 0,87 |
| chromosome 9 open reading frame 69                                                                                       | C9orf69       | 0,87 |
| chromosome 9 open reading frame 40                                                                                       | C9orf40       | 0,87 |
| apolipoprotein E                                                                                                         | APOE          | 0,87 |
| DEAH (Asp-Glu-Ala-His) box polypeptide 8                                                                                 | DHX8          | 0,87 |
| chromosome 20 open reading frame 27                                                                                      | C20orf27      | 0,87 |
| proline-rich nuclear receptor coactivator 1                                                                              | PNRC1         | 0,87 |
| uncoupling protein 3 (mitochondrial, proton carrier)                                                                     | UCP3          | 0,87 |
| clarin 3                                                                                                                 | CLRN3         | 0,87 |
| EPPIN-WFDC6 readthrough                                                                                                  | EPPIN-WFDC6   | 0,87 |
| butyrophilin, subfamily 2, member A3, pseudogene                                                                         | BTN2A3P       | 0,87 |
| steroid-5-alpha-reductase, alpha polypeptide 2 (3-oxo-5 alpha-steroid delta 4-dehydrogenase alpha 2)                     | SRD5A2        | 0,87 |
| asporin                                                                                                                  | ASPN          | 0,87 |
| general transcription factor IIIC subunit 1                                                                              | GTF3C1        | 0,87 |
| zinc finger protein 627                                                                                                  | ZNF627        | 0,87 |
| ER lipid raft associated 2                                                                                               | ERLIN2        | 0,87 |
| NADH dehydrogenase (ubiquinone) 1 alpha subcomplex, 6, 14kDa                                                             | NDUFA6        | 0,87 |
| izumo sperm-egg fusion 1                                                                                                 | IZUMO1        | 0,87 |
| neuroblastoma breakpoint family, member 20                                                                               | NBPF20        | 0,87 |
| transmembrane protein 86A                                                                                                | TMEM86A       | 0,87 |
| poly(A) binding protein, nuclear 1                                                                                       | PABPN1        | 0,87 |

|                                                                                        |                        |      |
|----------------------------------------------------------------------------------------|------------------------|------|
| heterochromatin protein 1, binding protein 3                                           | HP1BP3                 | 0,87 |
| ATP5J2-PTCD1 readthrough; pentatricopeptide repeat domain 1                            | ATP5J2-PTCD1;<br>PTCD1 | 0,87 |
| PRAME family member 33, pseudogene                                                     | PRAMEF33P              | 0,87 |
| NLR family, pyrin domain containing 14                                                 | NLRP14                 | 0,87 |
| sulfotransferase family 1A member 1                                                    | SULT1A1                | 0,87 |
| arylacetamide deacetylase-like 4                                                       | AADACL4                | 0,87 |
| G protein-coupled receptor 42 (gene/pseudogene)                                        | GPR42                  | 0,87 |
| ATP binding cassette subfamily A member 10                                             | ABCA10                 | 0,87 |
| Rho GTPase activating protein 15                                                       | ARHGAP15               | 0,87 |
| TRPC5 opposite strand                                                                  | TRPC5OS                | 0,87 |
| ADAM metallopeptidase with thrombospondin type 1 motif 5                               | ADAMTS5                | 0,87 |
| Transcript Identified by AceView, Entrez Gene ID(s) 83699                              | SH3BGRL2               | 0,87 |
| LIM homeobox 3                                                                         | LHX3                   | 0,87 |
| HUS1 checkpoint clamp component B                                                      | HUS1B                  | 0,87 |
| nuclear receptor subfamily 2, group C, member 1                                        | NR2C1                  | 0,87 |
| taste receptor, type 2, member 31                                                      | TAS2R31                | 0,87 |
| siah E3 ubiquitin protein ligase 1                                                     | SIAH1                  | 0,87 |
| family with sequence similarity 174, member B                                          | FAM174B                | 0,87 |
| H2.0-like homeobox                                                                     | HLX                    | 0,87 |
| Memczak2013 ANTISENSE, coding, INTERNAL, intronic best transcript NM_004544            | NDUFA10                | 0,87 |
| olfactory receptor, family 1, subfamily N, member 2                                    | OR1N2                  | 0,87 |
| ATP binding cassette subfamily A member 8                                              | ABCA8                  | 0,87 |
| G protein-coupled receptor 84                                                          | GPR84                  | 0,87 |
| polymerase (DNA-directed), delta interacting protein 3                                 | POLDIP3                | 0,87 |
| trace amine associated receptor 6                                                      | TAAR6                  | 0,87 |
| dpy-19-like 3 (C. elegans)                                                             | DPY19L3                | 0,87 |
| chromosome 15 open reading frame 32                                                    | C15orf32               | 0,87 |
| proline rich 22                                                                        | PRR22                  | 0,87 |
| claudin 24                                                                             | CLDN24                 | 0,87 |
| small nuclear ribonucleoprotein D2 polypeptide                                         | SNRPD2                 | 0,87 |
| inositol hexakisphosphate kinase 1                                                     | IP6K1                  | 0,87 |
| EGF-like, fibronectin type III and laminin G domains                                   | EGFLAM                 | 0,87 |
| Jeck2013 ANTISENSE, CDS, coding, INTERNAL, OVCODE, OVEXON best transcript NM_001042476 | CARHSP1                | 0,87 |
| ceramide-1-phosphate transfer protein                                                  | CPTP                   | 0,87 |
| cytidine and dCMP deaminase domain containing 1                                        | CDADC1                 | 0,87 |
| cysteine conjugate-beta lyase 2; RNA binding motif protein, X-linked-like 1            | CCBL2; RBMXL1          | 0,87 |
| guanine nucleotide binding protein (G protein), gamma 11                               | GNG11                  | 0,87 |
| surfactant protein A1                                                                  | SFTPA1                 | 0,87 |

|                                                                                                                             |                                   |      |
|-----------------------------------------------------------------------------------------------------------------------------|-----------------------------------|------|
| Transcript Identified by AceView, Entrez Gene ID(s) 63892                                                                   | THADA                             | 0,87 |
| poly(ADP-ribose) polymerase 1                                                                                               | PARP1                             | 0,87 |
| chromosome 11 open reading frame 45                                                                                         | C11orf45                          | 0,87 |
| extracellular matrix protein 2, female organ and adipocyte specific                                                         | ECM2                              | 0,87 |
| ubiquitin protein ligase E3 component n-recognin 2                                                                          | UBR2                              | 0,86 |
| ankyrin repeat domain 23                                                                                                    | ANKRD23                           | 0,86 |
| lysine (K)-specific methyltransferase 2E                                                                                    | KMT2E                             | 0,86 |
| t-complex 10-like 2                                                                                                         | TCP10L2                           | 0,86 |
| GATA binding protein 2                                                                                                      | GATA2                             | 0,86 |
| atlastin GTPase 3                                                                                                           | ATL3                              | 0,86 |
| taste receptor, type 2, member 41                                                                                           | TAS2R41                           | 0,86 |
| phosphatidylinositol-3,4,5-trisphosphate-dependent Rac exchange factor 2                                                    | PREX2                             | 0,86 |
| leucine rich repeat containing 4B                                                                                           | LRRC4B                            | 0,86 |
| Rho GTPase activating protein 29                                                                                            | ARHGAP29                          | 0,86 |
| olfactory receptor, family 5, subfamily P, member 3                                                                         | OR5P3                             | 0,86 |
| aquaporin 9                                                                                                                 | AQP9                              | 0,86 |
| family with sequence similarity 215, member A (non-protein coding)                                                          | FAM215A                           | 0,86 |
| spermatogenesis and centriole associated 1-like                                                                             | SPATC1L                           | 0,86 |
| caspase 14                                                                                                                  | CASP14                            | 0,86 |
| eomesodermin                                                                                                                | EOMES                             | 0,86 |
| ubiquitin specific peptidase 26                                                                                             | USP26                             | 0,86 |
| Ras association (RalGDS/AF-6) domain family (N-terminal) member 7                                                           | RASSF7                            | 0,86 |
| sialic acid binding Ig-like lectin 12 (gene/pseudogene)                                                                     | SIGLEC12                          | 0,86 |
| sterile alpha and TIR motif containing 1                                                                                    | SARM1                             | 0,86 |
| cilia and flagella associated protein 43                                                                                    | CFAP43                            | 0,86 |
| transmembrane protein 74                                                                                                    | TMEM74                            | 0,86 |
| keratin associated protein 5-9                                                                                              | KRTAP5-9                          | 0,86 |
| additional sex combs like transcriptional regulator 3                                                                       | ASXL3                             | 0,86 |
| actin-like 7A                                                                                                               | ACTL7A                            | 0,86 |
| calcium channel, voltage-dependent, beta 2 subunit                                                                          | CACNB2                            | 0,86 |
| isopentenyl-diphosphate delta isomerase 2                                                                                   | IDI2                              | 0,86 |
| ecotropic viral integration site 5-like                                                                                     | EVI5L                             | 0,86 |
| serine peptidase inhibitor, Kazal type 8 (putative)                                                                         | SPINK8                            | 0,86 |
| solute carrier organic anion transporter family, member 1A2                                                                 | SLCO1A2                           | 0,86 |
| kallikrein related peptidase 12                                                                                             | KLK12                             | 0,86 |
| methyl-CpG binding domain protein 3-like 2                                                                                  | MBD3L2                            | 0,86 |
| NODAL modulator 3 [Source:HGNC Symbol;Acc:HGNC:25242]; novel transcript, antisense to NOMO3; RP11-517A5.4 (from geneSymbol) | RP11-517A5.5; NOMO3; RP11-517A5.4 | 0,86 |



|                                                                                                                                                                                                                                       |                            |      |
|---------------------------------------------------------------------------------------------------------------------------------------------------------------------------------------------------------------------------------------|----------------------------|------|
| POU class 6 homeobox 1                                                                                                                                                                                                                | POU6F1                     | 0,86 |
| DEP domain containing 4                                                                                                                                                                                                               | DEPDC4                     | 0,86 |
| SPEG complex locus                                                                                                                                                                                                                    | SPEG                       | 0,86 |
| speedy/RINGO cell cycle regulator family member A                                                                                                                                                                                     | SPDYA                      | 0,86 |
| Transcript Identified by AceView, Entrez Gene ID(s) 9088                                                                                                                                                                              | PKMYT1                     | 0,86 |
| DEAD (Asp-Glu-Ala-Asp) box polypeptide 50                                                                                                                                                                                             | DDX50                      | 0,86 |
| Memczak2013 ALT_ACCEPTOR, ALT_DONOR, coding, INTERNAL, intronic best transcript NM_003574                                                                                                                                             | VAPA                       | 0,86 |
| carbohydrate (N-acetylglucosamine 6-O) sulfotransferase 7                                                                                                                                                                             | CHST7                      | 0,86 |
| cyclic nucleotide gated channel alpha 4                                                                                                                                                                                               | CNGA4                      | 0,86 |
| Transcript Identified by AceView, Entrez Gene ID(s) 4591                                                                                                                                                                              | TRIM37                     | 0,86 |
| tripartite motif containing 59                                                                                                                                                                                                        | TRIM59                     | 0,86 |
| ubiquinol-cytochrome c reductase hinge protein like                                                                                                                                                                                   | UQCRHL                     | 0,86 |
| stomatin (EPB72)-like 3                                                                                                                                                                                                               | STOML3                     | 0,86 |
| RPGRIP1-like                                                                                                                                                                                                                          | RPGRIP1L                   | 0,86 |
| 4-hydroxyphenylpyruvate dioxygenase-like                                                                                                                                                                                              | HPDL                       | 0,86 |
| Ellis van Creveld syndrome 2                                                                                                                                                                                                          | EVC2                       | 0,86 |
| nuclear receptor binding SET domain protein 1                                                                                                                                                                                         | NSD1                       | 0,86 |
| heterogeneous nuclear ribonucleoprotein C-like 2 [Source:HGNC Symbol;Acc:HGNC:48813]                                                                                                                                                  | HNRNPCL2                   | 0,86 |
| Homo sapiens similar to testis specific protein, Y-linked 1, mRNA (cDNA clone MGC:150413 IMAGE:40120433), complete cds.; Homo sapiens testis specific protein, Y-linked 3, mRNA (cDNA clone MGC:150414 IMAGE:40120435), complete cds. | LOC728395;<br>TSPY3        | 0,86 |
| Memczak2013 ANTISENSE, CDS, coding, INTERNAL best transcript NM_000714                                                                                                                                                                | TSPO                       | 0,86 |
| autophagy related 10                                                                                                                                                                                                                  | ATG10                      | 0,86 |
| guanine nucleotide binding protein (G protein) alpha 12                                                                                                                                                                               | GNA12                      | 0,86 |
| Transcript Identified by AceView, Entrez Gene ID(s) 55701                                                                                                                                                                             | RP11-998D10.7;<br>FLJ10357 | 0,86 |
| proline synthetase co-transcribed homolog (bacterial)                                                                                                                                                                                 | PROSC                      | 0,86 |
| pleckstrin homology-like domain, family B, member 1; microRNA 6716                                                                                                                                                                    | PHLDB1; MIR6716            | 0,86 |
| zinc finger protein 385D                                                                                                                                                                                                              | ZNF385D                    | 0,86 |
| long intergenic non-protein coding RNA 851                                                                                                                                                                                            | LINC00851                  | 0,86 |
| collagen, type XXVIII, alpha 1                                                                                                                                                                                                        | COL28A1                    | 0,86 |
| chromosome 8 open reading frame 31                                                                                                                                                                                                    | C8orf31                    | 0,86 |
| thymosin beta 15a                                                                                                                                                                                                                     | TMSB15A                    | 0,86 |
| ADAM metallopeptidase with thrombospondin type 1 motif 7                                                                                                                                                                              | ADAMTS7                    | 0,86 |
| caudal type homeobox 4                                                                                                                                                                                                                | CDX4                       | 0,86 |

|                                                                                                                              |          |      |
|------------------------------------------------------------------------------------------------------------------------------|----------|------|
| FEV (ETS oncogene family)                                                                                                    | FEV      | 0,86 |
| importin 9                                                                                                                   | IPO9     | 0,86 |
| helicase with zinc finger 2, transcriptional coactivator                                                                     | HELZ2    | 0,86 |
| T-cell leukemia/lymphoma 1A                                                                                                  | TCL1A    | 0,86 |
| potassium channel, voltage gated Shal related subfamily D, member 2                                                          | KCND2    | 0,86 |
| proline rich 27                                                                                                              | PRR27    | 0,86 |
| family with sequence similarity 197, Y-linked, member 1                                                                      | FAM197Y1 | 0,86 |
| pre-mRNA processing factor 4B                                                                                                | PRPF4B   | 0,86 |
| matrilin 4                                                                                                                   | MATN4    | 0,86 |
| solute carrier family 3 (amino acid transporter heavy chain), member 1                                                       | SLC3A1   | 0,86 |
| Memczak2013 ANTISENSE, CDS, coding, INTERNAL best transcript NM_002649                                                       | PIK3CG   | 0,86 |
| methylthioadenosine phosphorylase                                                                                            | MTAP     | 0,86 |
| unc-5 family C-terminal like                                                                                                 | UNC5CL   | 0,86 |
| ABO blood group (transferase A, alpha 1-3-N-acetylgalactosaminyltransferase; transferase B, alpha 1-3-galactosyltransferase) | ABO      | 0,86 |
| piwi-like RNA-mediated gene silencing 2                                                                                      | PIWIL2   | 0,86 |
| calcium release activated channel regulator 2B                                                                               | CRACR2B  | 0,86 |
| zinc finger protein 780A                                                                                                     | ZNF780A  | 0,86 |
| complement factor H-related 2                                                                                                | CFHR2    | 0,86 |
| lectin, galactoside-binding, soluble, 16                                                                                     | LGALS16  | 0,86 |
| Transcript Identified by AceView, Entrez Gene ID(s) 2043                                                                     | EPHA4    | 0,86 |
| symplesin                                                                                                                    | SYMPK    | 0,86 |
| BCL2-like 14 (apoptosis facilitator)                                                                                         | BCL2L14  | 0,86 |
| regulator of G-protein signaling 21                                                                                          | RGS21    | 0,86 |
| replication factor C subunit 5                                                                                               | RFC5     | 0,86 |
| Zhang2013 ALT_DONOR, coding, INTERNAL, intronic best transcript NM_002482                                                    | NASP     | 0,86 |
| trafficking protein particle complex 13                                                                                      | TRAPPC13 | 0,86 |
| gephyrin                                                                                                                     | GPHN     | 0,86 |
| capping protein (actin filament) muscle Z-line, alpha 2                                                                      | CAPZA2   | 0,86 |
| cilia and flagella associated protein 161                                                                                    | CFAP161  | 0,86 |
| C-type lectin domain family 1, member B                                                                                      | CLEC1B   | 0,86 |
| importin 13                                                                                                                  | IPO13    | 0,86 |
| Memczak2013 ALT_DONOR, coding, INTERNAL, intronic best transcript NM_014739                                                  | BCLAF1   | 0,86 |
| CD200 receptor 1 like                                                                                                        | CD200R1L | 0,86 |
| proprotein convertase subtilisin/kexin type 4                                                                                | PCSK4    | 0,86 |
| TNF receptor-associated factor 2                                                                                             | TRAF2    | 0,86 |
| Rho guanine nucleotide exchange factor 7                                                                                     | ARHGEF7  | 0,86 |

|                                                                                                                 |                  |      |
|-----------------------------------------------------------------------------------------------------------------|------------------|------|
| trace amine associated receptor 5                                                                               | TAAR5            | 0,86 |
| chromosome 14 open reading frame 177                                                                            | C14orf177        | 0,86 |
| metadherin                                                                                                      | MTDH             | 0,86 |
| PHD and ring finger domains 1                                                                                   | PHRF1            | 0,86 |
| transmembrane protein 186                                                                                       | TMEM186          | 0,86 |
| calcium-binding protein, spermatid-specific 1                                                                   | CABS1            | 0,86 |
| cadherin-related 23                                                                                             | CDH23            | 0,86 |
| keratin associated protein 13-1                                                                                 | KRTAP13-1        | 0,86 |
| phospholipase D family, member 3                                                                                | PLD3             | 0,86 |
| eukaryotic translation elongation factor 1 gamma;<br>microRNA 3654                                              | EEF1G; MIR3654   | 0,86 |
| proteasome subunit alpha 3                                                                                      | PSMA3            | 0,86 |
| family with sequence similarity 69, member B                                                                    | FAM69B           | 0,86 |
| thiosulfate sulfurtransferase (rhodanese)-like domain<br>containing 2                                           | TSTD2            | 0,86 |
| mechanistic target of rapamycin (serine/threonine<br>kinase)                                                    | MTOR             | 0,86 |
| src kinase associated phosphoprotein 1                                                                          | SKAP1            | 0,86 |
| Transcript Identified by AceView, Entrez Gene ID(s)<br>10978; novel transcript, sense overlapping CLP1          | CLP1; AP000662.4 | 0,86 |
| chaperonin containing TCP1, subunit 2 (beta)                                                                    | CCT2             | 0,86 |
| origin recognition complex subunit 6                                                                            | ORC6             | 0,86 |
| SKI/DACH domain containing 1                                                                                    | SKIDA1           | 0,86 |
| Transcript Identified by AceView, Entrez Gene ID(s) 10580                                                       | SORBS1           | 0,86 |
| adhesion G protein-coupled receptor B3                                                                          | ADGRB3           | 0,86 |
| fructose-1,6-bisphosphatase 2                                                                                   | FBP2             | 0,86 |
| eukaryotic translation initiation factor 3, subunit B                                                           | EIF3B            | 0,86 |
| Fc receptor-like A                                                                                              | FCRLA            | 0,86 |
| family with sequence similarity 24, member A                                                                    | FAM24A           | 0,86 |
| mucin 16, cell surface associated                                                                               | MUC16            | 0,86 |
| Werner syndrome, RecQ helicase-like                                                                             | WRN              | 0,86 |
| pterin-4 alpha-carbinolamine dehydratase/dimerization<br>cofactor of hepatocyte nuclear factor 1 alpha (TCF1) 2 | PCBD2            | 0,86 |
| brain expressed X-linked 5                                                                                      | BEX5             | 0,86 |
| tetratricopeptide repeat domain 6                                                                               | TTC6             | 0,86 |
| ring finger protein 130                                                                                         | RNF130           | 0,86 |
| non-SMC condensin II complex subunit G2                                                                         | NCAPG2           | 0,86 |
| olfactory receptor, family 10, subfamily X, member 1<br>(gene/pseudogene)                                       | OR10X1           | 0,86 |
| ribosomal protein S10                                                                                           | RPS10            | 0,86 |
| transcription factor Dp family, member 3                                                                        | TFDP3            | 0,86 |
| MAS-related GPR, member X3                                                                                      | MRGPRX3          | 0,86 |
| lin-54 DREAM MuvB core complex component                                                                        | LIN54            | 0,86 |
| ribosomal protein L9                                                                                            | RPL9             | 0,86 |

|                                                                      |           |      |
|----------------------------------------------------------------------|-----------|------|
| ring finger protein 149                                              | RNF149    | 0,86 |
| keratin associated protein 11-1                                      | KRTAP11-1 | 0,86 |
| DAZ associated protein 1                                             | DAZAP1    | 0,86 |
| Fc receptor-like 2                                                   | FCRL2     | 0,86 |
| Transcript Identified by AceView, Entrez Gene ID(s) 5800             | PTPRO     | 0,86 |
| synaptotagmin-like 2                                                 | SYTL2     | 0,86 |
| solute carrier family 37 (glucose-6-phosphate transporter), member 1 | SLC37A1   | 0,86 |
| retinoblastoma-like 1                                                | RBL1      | 0,86 |
| MON1 secretory trafficking family member A                           | MON1A     | 0,86 |
| protein phosphatase 2C-like domain containing 1                      | PP2D1     | 0,86 |
| kelch-like family member 35                                          | KLHL35    | 0,86 |
| epididymal sperm binding protein 1                                   | ELSPBP1   | 0,86 |
| squamous cell carcinoma antigen recognized by T-cells 1              | SART1     | 0,86 |
| family with sequence similarity 43, member B                         | FAM43B    | 0,86 |
| secretogranin V                                                      | SCG5      | 0,86 |
| NADH dehydrogenase (ubiquinone) 1 alpha subcomplex, 1, 7.5kDa        | NDUFA1    | 0,86 |
| tetraspanin 11                                                       | TSPAN11   | 0,86 |
| caspase 10                                                           | CASP10    | 0,86 |
| Transcript Identified by AceView, Entrez Gene ID(s) 80271            | ITPKC     | 0,86 |
| mesoderm posterior bHLH transcription factor 2                       | MESP2     | 0,86 |
| triggering receptor expressed on myeloid cells-like 4                | TREML4    | 0,86 |
| ATPase inhibitory factor 1                                           | ATPIF1    | 0,86 |
| RIMS binding protein 3C                                              | RIMBP3C   | 0,86 |
| structural maintenance of chromosomes 1A                             | SMC1A     | 0,86 |
| phospholipase D family, member 4                                     | PLD4      | 0,86 |
| family with sequence similarity 217, member A                        | FAM217A   | 0,86 |
| olfactory receptor, family 6, subfamily M, member 1                  | OR6M1     | 0,86 |
| regulator of G-protein signaling 12                                  | RGS12     | 0,86 |
| protein kinase C and casein kinase substrate in neurons 1            | PACSIN1   | 0,86 |
| fibroblast growth factor 12                                          | FGF12     | 0,86 |
| multiple coagulation factor deficiency 2                             | MCFD2     | 0,86 |
| kinesin family member 5A                                             | KIF5A     | 0,86 |
| hedgehog acyltransferase                                             | HHAT      | 0,86 |
| Rho-related BTB domain containing 2                                  | RHOBTB2   | 0,86 |
| WAP four-disulfide core domain 11                                    | WFDC11    | 0,86 |
| NADH dehydrogenase (ubiquinone) 1 alpha subcomplex, 10, 42kDa        | NDUFA10   | 0,86 |
| NK1 homeobox 2                                                       | NKX1-2    | 0,86 |
| chromosome 16 open reading frame 96                                  | C16orf96  | 0,86 |

|                                                                                              |                |      |
|----------------------------------------------------------------------------------------------|----------------|------|
| ER degradation enhancer, mannosidase alpha-like 1                                            | EDEM1          | 0,86 |
| endoplasmic reticulum oxidoreductase beta                                                    | ERO1B          | 0,86 |
| transmembrane protein 126A                                                                   | TMEM126A       | 0,86 |
| RNA binding motif, single stranded interacting protein 1;<br>microRNA 4785                   | RBMS1; MIR4785 | 0,86 |
| DEAF1 transcription factor                                                                   | DEAF1          | 0,86 |
| taste receptor, type 2, member 42                                                            | TAS2R42        | 0,86 |
| phenazine biosynthesis-like protein domain containing                                        | PBLD           | 0,86 |
| ADAM metallopeptidase with thrombospondin type 1<br>motif 13                                 | ADAMTS13       | 0,86 |
| immunoglobulin superfamily containing leucine-rich<br>repeat 2                               | ISLR2          | 0,86 |
| protein kinase, X-linked                                                                     | PRKX           | 0,86 |
| sosondowah ankyrin repeat domain family member C                                             | SOWAHC         | 0,86 |
| protein phosphatase, Mg2+/Mn2+ dependent, 1E                                                 | PPM1E          | 0,86 |
| NODAL modulator 2                                                                            | NOMO2          | 0,86 |
| aldo-keto reductase family 1, member C3                                                      | AKR1C3         | 0,86 |
| radial spoke head 10 homolog B2 (Chlamydomonas)                                              | RSPH10B2       | 0,86 |
| kallikrein related peptidase 5                                                               | KLK5           | 0,86 |
| nucleoporin 88kDa                                                                            | NUP88          | 0,86 |
| lysine-rich nucleolar protein 1                                                              | KNOP1          | 0,86 |
| topoisomerase (DNA) I, mitochondrial                                                         | TOP1MT         | 0,86 |
| family with sequence similarity 201, member A                                                | FAM201A        | 0,86 |
| ubiquitin-fold modifier 1                                                                    | UFM1           | 0,86 |
| zinc finger protein 502                                                                      | ZNF502         | 0,86 |
| dipeptidase 3                                                                                | DPEP3          | 0,86 |
| mago homolog, exon junction complex core component                                           | MAGOH          | 0,86 |
| PML-RARA regulated adaptor molecule 1                                                        | PRAM1          | 0,86 |
| basic transcription factor 3-like 4                                                          | BTF3L4         | 0,86 |
| armadillo repeat containing, X-linked 1                                                      | ARMCX1         | 0,86 |
| synapse defective 1, Rho GTPase, homolog 1 (C. elegans)                                      | SYDE1          | 0,86 |
| Memczak2013 ALT_ACCEPTOR, ALT_DONOR, coding,<br>INTERNAL, intronic best transcript NM_020397 | CAMK1D         | 0,86 |
| peptidase D                                                                                  | PEPD           | 0,86 |
| Memczak2013 ALT_ACCEPTOR, ALT_DONOR, coding,<br>INTERNAL, intronic best transcript NM_003664 | AP3B1          | 0,86 |
| Rho GTPase activating protein 8                                                              | ARHGAP8        | 0,86 |
| contactin associated protein-like 3                                                          | CNTNAP3        | 0,86 |
| chromosome 15 open reading frame 62                                                          | C15orf62       | 0,86 |
| zinc finger protein 44                                                                       | ZNF44          | 0,86 |
| zinc finger, AN1-type domain 4                                                               | ZFAND4         | 0,86 |
| chromosome 9 open reading frame 131                                                          | C9orf131       | 0,86 |
| SIX homeobox 6                                                                               | SIX6           | 0,86 |
| major histocompatibility complex, class II, DO beta                                          | HLA-DOB        | 0,86 |

|                                                                                              |             |      |
|----------------------------------------------------------------------------------------------|-------------|------|
| mitogen-activated protein kinase 6                                                           | MAPK6       | 0,86 |
| C-type lectin domain family 2, member B                                                      | CLEC2B      | 0,86 |
| formyl peptide receptor 1                                                                    | FPR1        | 0,86 |
| adrenoceptor beta 1                                                                          | ADRB1       | 0,86 |
| deleted in malignant brain tumors 1                                                          | DMBT1       | 0,86 |
| chemokine (C-X-C motif) receptor 6                                                           | CXCR6       | 0,86 |
| arginyl-tRNA synthetase                                                                      | RARS        | 0,86 |
| BMS1 ribosome biogenesis factor                                                              | BMS1        | 0,86 |
| solute carrier family 16 (monocarboxylate transporter), member 8                             | SLC16A8     | 0,86 |
| phosphodiesterase 4B, cAMP-specific                                                          | PDE4B       | 0,86 |
| long intergenic non-protein coding RNA 1561                                                  | LINC01561   | 0,86 |
| cell division cycle 34                                                                       | CDC34       | 0,86 |
| methyltransferase like 10                                                                    | METTL10     | 0,86 |
| tetratricopeptide repeat domain 22                                                           | TTC22       | 0,86 |
| interleukin 3                                                                                | IL3         | 0,86 |
| killer cell lectin-like receptor subfamily F, member 2                                       | KLRF2       | 0,86 |
| abnormal spindle microtubule assembly                                                        | ASPM        | 0,86 |
| pseudouridine 5-phosphatase                                                                  | PUDP        | 0,86 |
| protein O-linked mannose N-acetylglucosaminyltransferase 2 (beta 1,4-)                       | POMGNT2     | 0,86 |
| NADPH oxidase organizer 1                                                                    | NOXO1       | 0,86 |
| tigger transposable element derived 3                                                        | TIGD3       | 0,86 |
| galectin-related inter-fiber protein                                                         | GRIFIN      | 0,86 |
| Williams-Beuren syndrome chromosome region 17                                                | WBSCR17     | 0,86 |
| proline, glutamate and leucine rich protein 1                                                | PELP1       | 0,86 |
| kinesin family member 18A                                                                    | KIF18A      | 0,86 |
| interferon, beta 1, fibroblast                                                               | IFNB1       | 0,86 |
| ceramide synthase 1; growth differentiation factor 1                                         | CERS1; GDF1 | 0,86 |
| peripheral myelin protein 2                                                                  | PMP2        | 0,86 |
| aminoadipate-semialdehyde dehydrogenase-phosphopantetheinyl transferase                      | AASDHPPT    | 0,86 |
| NFU1 iron-sulfur cluster scaffold                                                            | NFU1        | 0,86 |
| chemokine (C-C motif) ligand 27                                                              | CCL27       | 0,86 |
| Dmx-like 1                                                                                   | DMXL1       | 0,86 |
| autophagy related 4D, cysteine peptidase                                                     | ATG4D       | 0,86 |
| family with sequence similarity 3, member A                                                  | FAM3A       | 0,86 |
| centromere protein K                                                                         | CENPK       | 0,86 |
| kallikrein related peptidase 9                                                               | KLK9        | 0,86 |
| hypermethylated in cancer 1                                                                  | HIC1        | 0,86 |
| src-related kinase lacking C-terminal regulatory tyrosine and N-terminal myristylation sites | SRMS        | 0,86 |
| Memczak2013 ANTISENSE, CDS, coding, INTERNAL, UTR3 best transcript NM_022727                 | TRMT2A      | 0,86 |

|                                                                                                                                                    |                                |      |
|----------------------------------------------------------------------------------------------------------------------------------------------------|--------------------------------|------|
| NADH dehydrogenase (ubiquinone) 1 alpha subcomplex, 13                                                                                             | NDUFA13                        | 0,86 |
| solute carrier family 35, member E2B                                                                                                               | SLC35E2B                       | 0,86 |
| contactin 6                                                                                                                                        | CNTN6                          | 0,86 |
| transmembrane protein 161B                                                                                                                         | TMEM161B                       | 0,86 |
| dual specificity phosphatase 7                                                                                                                     | DUSP7                          | 0,86 |
| Transcript Identified by AceView, Entrez Gene ID(s) 55222                                                                                          | LRRC20                         | 0,85 |
| adenosine A2b receptor                                                                                                                             | ADORA2B                        | 0,85 |
| opsin 1 (cone pigments), medium-wave-sensitive; opsin 1 (cone pigments), medium-wave-sensitive 2; opsin 1 (cone pigments), medium-wave-sensitive 3 | OPN1MW;<br>OPN1MW2;<br>OPN1MW3 | 0,85 |
| myozenin 3                                                                                                                                         | MYOZ3                          | 0,85 |
| chromosome 6 open reading frame 183                                                                                                                | C6orf183                       | 0,85 |
| eukaryotic elongation factor 2 kinase                                                                                                              | EEF2K                          | 0,85 |
| hyaluronan binding protein 2                                                                                                                       | HABP2                          | 0,85 |
| upstream binding transcription factor, RNA polymerase I-like 1                                                                                     | UBTFL1                         | 0,85 |
| hydroxymethylbilane synthase                                                                                                                       | HMBS                           | 0,85 |
| zinc finger protein 785                                                                                                                            | ZNF785                         | 0,85 |
| Transcript Identified by AceView, Entrez Gene ID(s) 240                                                                                            | ALOX5                          | 0,85 |
| kinesin family member 22                                                                                                                           | KIF22                          | 0,85 |
| MYCBP associated protein                                                                                                                           | MYCBPAP                        | 0,85 |
| tankyrase, TRF1-interacting ankyrin-related ADP-ribose polymerase                                                                                  | TNKS                           | 0,85 |
| family with sequence similarity 166, member A                                                                                                      | FAM166A                        | 0,85 |
| dermatopontin                                                                                                                                      | DPT                            | 0,85 |
| thyroglobulin                                                                                                                                      | TG                             | 0,85 |
| beclin 2                                                                                                                                           | BECN2                          | 0,85 |
| ribosomal protein L7a                                                                                                                              | RPL7A                          | 0,85 |
| FAD-dependent oxidoreductase domain containing 1                                                                                                   | FOXRED1                        | 0,85 |
| Rho GTPase activating protein 35                                                                                                                   | ARHGAP35                       | 0,85 |
| tubulin folding cofactor B                                                                                                                         | TBCB                           | 0,85 |
| ankyrin repeat domain 18A; family with sequence similarity 95, member C                                                                            | ANKRD18A;<br>FAM95C            | 0,85 |
| zinc finger protein 16                                                                                                                             | ZNF16                          | 0,85 |
| cholinergic receptor, nicotinic alpha 1                                                                                                            | CHRNA1                         | 0,85 |
| transmembrane protein 25                                                                                                                           | TMEM25                         | 0,85 |
| HECT and RLD domain containing E3 ubiquitin protein ligase 3                                                                                       | HERC3                          | 0,85 |
| xanthine dehydrogenase                                                                                                                             | XDH                            | 0,85 |
| secreted phosphoprotein 2                                                                                                                          | SPP2                           | 0,85 |
| NmrA-like family domain containing 1                                                                                                               | NMRAL1                         | 0,85 |
| Zhang2013 ALT_ACCEPTOR, ALT_DONOR, coding, INTERNAL, intronic best transcript NM_030653                                                            | DDX11                          | 0,85 |

|                                                                                                                             |                                         |      |
|-----------------------------------------------------------------------------------------------------------------------------|-----------------------------------------|------|
| Y box binding protein 2                                                                                                     | YBX2                                    | 0,85 |
| Salzman2013 ALT_ACCEPTOR, ALT_DONOR, coding, INTERNAL, intronic best transcript NM_015092                                   | SMG1                                    | 0,85 |
| succinate dehydrogenase complex subunit D, integral membrane protein                                                        | SDHD                                    | 0,85 |
| zinc finger protein 564                                                                                                     | ZNF564                                  | 0,85 |
| zinc finger, AN1-type domain 1                                                                                              | ZFAND1                                  | 0,85 |
| olfactory receptor, family 12, subfamily D, member 2 (gene/pseudogene)                                                      | OR12D2                                  | 0,85 |
| coiled-coil domain containing 182                                                                                           | CCDC182                                 | 0,85 |
| SLAM family member 6                                                                                                        | SLAMF6                                  | 0,85 |
| zinc finger protein 398                                                                                                     | ZNF398                                  | 0,85 |
| contactin 2 (axonal)                                                                                                        | CNTN2                                   | 0,85 |
| tectorin alpha                                                                                                              | TECTA                                   | 0,85 |
| transient receptor potential cation channel, subfamily C, member 4 associated protein                                       | TRPC4AP                                 | 0,85 |
| transmembrane protease, serine 4                                                                                            | TMPRSS4                                 | 0,85 |
| superoxide dismutase 3, extracellular                                                                                       | SOD3                                    | 0,85 |
| nucleotide binding protein-like                                                                                             | NUBPL                                   | 0,85 |
| 1-acylglycerol-3-phosphate O-acyltransferase 5                                                                              | AGPAT5                                  | 0,85 |
| tetratricopeptide repeat domain 28                                                                                          | TTC28                                   | 0,85 |
| spondin 2, extracellular matrix protein                                                                                     | SPON2                                   | 0,85 |
| uncharacterized LOC100506142; Memczak2013 ANTISENSE, coding, INTERNAL, intronic best transcript NM_012249; novel transcript | LOC100506142;<br>RP11-417F21.1;<br>RHOQ | 0,85 |
| transmembrane channel like 1                                                                                                | TMC1                                    | 0,85 |
| chromosome 17 open reading frame 51                                                                                         | C17orf51                                | 0,85 |
| adaptor-related protein complex 3, beta 1 subunit                                                                           | AP3B1                                   | 0,85 |
| PDLIM1 interacting kinase 1 like                                                                                            | PDIK1L                                  | 0,85 |
| chromosome 14 open reading frame 142                                                                                        | C14orf142                               | 0,85 |
| replication timing regulatory factor 1                                                                                      | RIF1                                    | 0,85 |
| adhesion G protein-coupled receptor B1                                                                                      | ADGRB1                                  | 0,85 |
| deoxyhypusine hydroxylase/monooxygenase                                                                                     | DOHH                                    | 0,85 |
| Transcript Identified by AceView, Entrez Gene ID(s) 8470                                                                    | SORBS2                                  | 0,85 |
| maestro heat-like repeat family member 5                                                                                    | MROH5                                   | 0,85 |
| olfactory receptor, family 13, subfamily A, member 1                                                                        | OR13A1                                  | 0,85 |
| RAB14, member RAS oncogene family                                                                                           | RAB14                                   | 0,85 |
| olfactory receptor, family 51, subfamily V, member 1                                                                        | OR51V1                                  | 0,85 |
| shroom family member 2                                                                                                      | SHROOM2                                 | 0,85 |
| stem-loop binding protein                                                                                                   | SLBP                                    | 0,85 |
| cilia and flagella associated protein 99                                                                                    | CFAP99                                  | 0,85 |
| CD40 ligand                                                                                                                 | CD40LG                                  | 0,85 |
| PRAME family member 8                                                                                                       | PRAMEF8                                 | 0,85 |
| premelanosome protein                                                                                                       | PMEL                                    | 0,85 |



|                                                                          |          |      |
|--------------------------------------------------------------------------|----------|------|
| UDP-GlcNAc:betaGal beta-1,3-N-acetylglucosaminyltransferase-like 1       | B3GNTL1  | 0,85 |
| zinc finger protein 429                                                  | ZNF429   | 0,85 |
| gamma-aminobutyric acid (GABA) A receptor, beta 1                        | GABRB1   | 0,85 |
| DND microRNA-mediated repression inhibitor 1                             | DND1     | 0,85 |
| 5-nucleotidase, cytosolic IA                                             | NT5C1A   | 0,85 |
| structural maintenance of chromosomes flexible hinge domain containing 1 | SMCHD1   | 0,85 |
| solute carrier family 25 (aspartate/glutamate carrier), member 13        | SLC25A13 | 0,85 |
| transmembrane protein 82                                                 | TMEM82   | 0,85 |
| short stature homeobox                                                   | SHOX     | 0,85 |
| T-cell immunoreceptor with Ig and ITIM domains                           | TIGIT    | 0,85 |
| MLX, MAX dimerization protein                                            | MLX      | 0,85 |
| dipeptidyl-peptidase 6                                                   | DPP6     | 0,85 |
| transmembrane protein 52                                                 | TMEM52   | 0,85 |
| solute carrier family 25 (S-adenosylmethionine carrier), member 26       | SLC25A26 | 0,85 |
| Fanconi anemia complementation group G                                   | FANCG    | 0,85 |
| intraflagellar transport 81                                              | IFT81    | 0,85 |
| MMS22-like, DNA repair protein                                           | MMS22L   | 0,85 |
| S100 calcium binding protein A12                                         | S100A12  | 0,85 |
| transcription elongation factor A (SII), 1                               | TCEA1    | 0,85 |
| chromosome 4 open reading frame 27                                       | C4orf27  | 0,85 |
| mex-3 RNA binding family member B                                        | MEX3B    | 0,85 |
| RAB40C, member RAS oncogene family                                       | RAB40C   | 0,85 |
| melanocortin 3 receptor                                                  | MC3R     | 0,85 |
| olfactory receptor, family 6, subfamily K, member 3                      | OR6K3    | 0,85 |
| clavesin 2                                                               | CLVS2    | 0,85 |
| dynein, axonemal, heavy chain 10                                         | DNAH10   | 0,85 |
| NADH dehydrogenase (ubiquinone) 1 alpha subcomplex, 2, 8kDa              | NDUFA2   | 0,85 |
| DEAD (Asp-Glu-Ala-Asp) box polypeptide 60                                | DDX60    | 0,85 |
| secreted LY6/PLAUR domain containing 1                                   | SLURP1   | 0,85 |
| BRF1, RNA polymerase III transcription initiation factor 90 kDa subunit  | BRF1     | 0,85 |
| POU class 3 homeobox 2                                                   | POU3F2   | 0,85 |
| protein kinase C, beta                                                   | PRKCB    | 0,85 |
| zinc finger and BTB domain containing 44                                 | ZBTB44   | 0,85 |
| zinc finger and BTB domain containing 7C                                 | ZBTB7C   | 0,85 |
| cathelicidin antimicrobial peptide                                       | CAMP     | 0,85 |
|                                                                          | LRIG1    | 0,85 |
| olfactory receptor, family 6, subfamily C, member 65                     | OR6C65   | 0,85 |
| BEN domain containing 4                                                  | BEND4    | 0,85 |
| family with sequence similarity 83, member F                             | FAM83F   | 0,85 |

|                                                                                  |                    |      |
|----------------------------------------------------------------------------------|--------------------|------|
| WAP four-disulfide core domain 12                                                | WFDC12             | 0,85 |
| nucleophosmin (nucleolar phosphoprotein B23, numatrin)                           | NPM1               | 0,85 |
| coagulation factor III (thromboplastin, tissue factor)                           | F3                 | 0,85 |
| MAP6 domain containing 1                                                         | MAP6D1             | 0,85 |
| retinoic acid receptor responder (tazarotene induced) 1                          | RARRES1            | 0,85 |
| bone morphogenetic protein 5                                                     | BMP5               | 0,85 |
| Fanconi anemia complementation group F                                           | FANCF              | 0,85 |
| translocase of outer mitochondrial membrane 6 homolog (yeast); prickie homolog 4 | TOMM6;<br>PRICKLE4 | 0,85 |
| WD repeat domain 88                                                              | WDR88              | 0,85 |
| proline-rich coiled-coil 2C                                                      | PRRC2C             | 0,85 |
| zinc finger protein 696                                                          | ZNF696             | 0,85 |
| papillary renal cell carcinoma (translocation-associated)                        | PRCC               | 0,85 |
| brain-enriched guanylate kinase-associated                                       | BEGAIN             | 0,85 |
| aryl hydrocarbon receptor nuclear translocator-like                              | ARNTL              | 0,85 |
| cortexin 1                                                                       | CTXN1              | 0,85 |
| STX16-NPEPL1 readthrough (NMD candidate)                                         | STX16-NPEPL1       | 0,85 |
| pleckstrin                                                                       | PLEK               | 0,85 |
| mucin 3A, cell surface associated                                                | MUC3A              | 0,85 |
| lysine (K)-specific demethylase 4A                                               | KDM4A              | 0,85 |
| zinc finger protein 791                                                          | ZNF791             | 0,85 |
| selectin E                                                                       | SELE               | 0,85 |
| SLIT-ROBO Rho GTPase activating protein 2C                                       | SRGAP2C            | 0,85 |
| RAP1A, member of RAS oncogene family                                             | RAP1A              | 0,85 |
| translocase of outer mitochondrial membrane 22 homolog (yeast)                   | TOMM22             | 0,85 |
| glutamate receptor, ionotropic, N-methyl D-aspartate 1                           | GRIN1              | 0,85 |
| centrosomal protein 250kDa                                                       | CEP250             | 0,85 |
| paired box 3                                                                     | PAX3               | 0,85 |
| family with sequence similarity 69, member A                                     | FAM69A             | 0,85 |
| calcium channel, voltage-dependent, alpha 2/delta subunit 1                      | CACNA2D1           | 0,85 |
| zinc finger protein 12                                                           | ZNF12              | 0,85 |
| membrane-spanning 4-domains, subfamily A, member 8                               | MS4A8              | 0,85 |
| stromal antigen 3-like 1 (pseudogene)                                            | STAG3L1            | 0,85 |
| claudin 12                                                                       | CLDN12             | 0,85 |
| olfactory receptor, family 4, subfamily F, member 15                             | OR4F15             | 0,85 |
| ring finger protein 39                                                           | RNF39              | 0,85 |
| twist family bHLH transcription factor 2                                         | TWIST2             | 0,85 |
| zinc finger protein 672                                                          | ZNF672             | 0,85 |
| low density lipoprotein receptor class A domain containing 3                     | LDLRAD3            | 0,85 |
| doublecortin-like kinase 3                                                       | DCLK3              | 0,85 |

|                                                                                                                |                                  |      |
|----------------------------------------------------------------------------------------------------------------|----------------------------------|------|
| family with sequence similarity 81, member B                                                                   | FAM81B                           | 0,85 |
| forkhead box L2                                                                                                | FOXL2                            | 0,85 |
| required for meiotic nuclear division 5 homolog B                                                              | RMND5B                           | 0,85 |
| uncharacterized LOC285692; novel transcript; Transcript Identified by AceView, Entrez Gene ID(s) 285692; 50834 | LOC285692; CTD-2143L24.1; TAS2R1 | 0,85 |
| solute carrier family 38, member 10                                                                            | SLC38A10                         | 0,85 |
| ADP-ribosylation factor like GTPase 14                                                                         | ARL14                            | 0,85 |
| outer dense fiber of sperm tails 1                                                                             | ODF1                             | 0,85 |
| myosin light chain 5                                                                                           | MYL5                             | 0,85 |
| potassium channel, inwardly rectifying subfamily J, member 18                                                  | KCNJ18                           | 0,85 |
| chordin-like 2                                                                                                 | CHRD12                           | 0,85 |
| deoxythymidylate kinase                                                                                        | DTYMK                            | 0,85 |
| Transcript Identified by AceView, Entrez Gene ID(s) 79868                                                      | ALG13                            | 0,85 |
| integrin alpha 8                                                                                               | ITGA8                            | 0,85 |
| solute carrier family 13 (sodium-dependent dicarboxylate transporter), member 3; TP53 regulating kinase        | SLC13A3; TP53RK                  | 0,85 |
| tyrosine kinase, non-receptor, 1                                                                               | TNK1                             | 0,85 |
| ATP synthase, H <sup>+</sup> transporting, mitochondrial Fo complex subunit F6                                 | ATP5J                            | 0,85 |
| olfactory receptor, family 10, subfamily G, member 4                                                           | OR10G4                           | 0,85 |
| transmembrane protein 55B                                                                                      | TMEM55B                          | 0,85 |
| zinc finger protein 236                                                                                        | ZNF236                           | 0,85 |
| MGAT4 family, member C                                                                                         | MGAT4C                           | 0,85 |
| PRAME family member 2                                                                                          | PRAMEF2                          | 0,85 |
| Transcript Identified by AceView, Entrez Gene ID(s) 63899                                                      | NSUN3                            | 0,85 |
| amyloid beta (A4) precursor protein-binding, family B, member 3                                                | APBB3                            | 0,85 |
| signal-induced proliferation-associated 1 like 3                                                               | SIPA1L3                          | 0,85 |
| forkhead box O3                                                                                                | FOXO3                            | 0,85 |
| CTAGE family, member 8; CTAGE family, member 4                                                                 | CTAGE8; CTAGE4                   | 0,85 |
| diacylglycerol kinase, delta 130kDa                                                                            | DGKD                             | 0,85 |
| zinc finger CCCH-type containing 7B                                                                            | ZC3H7B                           | 0,85 |
| HECT and RLD domain containing E3 ubiquitin protein ligase 5                                                   | HERC5                            | 0,85 |
| uncharacterized LOC101928137; novel transcript                                                                 | LOC101928137; RP11-314D7.2       | 0,85 |
| cysteinyl leukotriene receptor 1                                                                               | CYSLTR1                          | 0,85 |
| embryonic ectoderm development; microRNA 6755                                                                  | EED; MIR6755                     | 0,85 |
| nescient helix-loop-helix 1                                                                                    | NHLH1                            | 0,85 |
| RE1-silencing transcription factor                                                                             | REST                             | 0,85 |

|                                                                                              |                  |      |
|----------------------------------------------------------------------------------------------|------------------|------|
| KIAA1143 [Source:HGNC Symbol;Acc:HGNC:29198]                                                 | KIAA1143         | 0,85 |
| long intergenic non-protein coding RNA 282                                                   | LINC00282        | 0,85 |
| coatamer protein complex subunit zeta 2                                                      | COPZ2            | 0,85 |
| mitochondrial ribosomal protein S14                                                          | MRPS14           | 0,85 |
| heterogeneous nuclear ribonucleoprotein C-like 1                                             | HNRNPCL1         | 0,85 |
| inturned planar cell polarity protein                                                        | INTU             | 0,85 |
| solute carrier family 39 (zinc transporter), member 4                                        | SLC39A4          | 0,85 |
| tectonic family member 1                                                                     | TCTN1            | 0,85 |
| neuroligin 2                                                                                 | NLGN2            | 0,85 |
| zinc finger protein 771                                                                      | ZNF771           | 0,85 |
| uroplakin 2                                                                                  | UPK2             | 0,85 |
| solute carrier family 52 (riboflavin transporter), member 3                                  | SLC52A3          | 0,85 |
| inositol-trisphosphate 3-kinase A                                                            | ITPKA            | 0,85 |
| Memczak2013 ALT_ACCEPTOR, ALT_DONOR, coding, INTERNAL, intronic best transcript NM_001098512 | PRKG1            | 0,85 |
| ADAM metallopeptidase with thrombospondin type 1 motif 13                                    | ADAMTS13         | 0,85 |
| peroxisomal biogenesis factor 5-like                                                         | PEX5L            | 0,85 |
| ring finger protein 113A                                                                     | RNF113A          | 0,85 |
| low density lipoprotein receptor; microRNA 6886                                              | LDLR; MIR6886    | 0,85 |
| IKAROS family zinc finger 1                                                                  | IKZF1            | 0,85 |
| prospero homeobox 2                                                                          | PROX2            | 0,85 |
| multiple EGF-like-domains 10                                                                 | MEGF10           | 0,85 |
| synaptotagmin XIII                                                                           | SYT13            | 0,85 |
| CUGBP, Elav-like family member 4                                                             | CELF4            | 0,85 |
| zinc finger and BTB domain containing 26                                                     | ZBTB26           | 0,85 |
| interleukin 5 receptor, alpha                                                                | IL5RA            | 0,85 |
| ryanodine receptor 1 (skeletal)                                                              | RYR1             | 0,85 |
| GRB10 interacting GYF protein 1                                                              | GIGYF1           | 0,85 |
| trafficking protein particle complex 4                                                       | TRAPPC4          | 0,85 |
| abhydrolase domain containing 16A                                                            | ABHD16A          | 0,85 |
| cyclin-dependent kinase 13                                                                   | CDK13            | 0,85 |
| B-cell CLL/lymphoma 2                                                                        | BCL2             | 0,85 |
| p53-induced death domain protein 1                                                           | PIDD1            | 0,85 |
| Memczak2013 ANTISENSE, coding, INTERNAL, intronic best transcript NM_003940                  | USP13            | 0,85 |
| deltex 3 like, E3 ubiquitin ligase                                                           | DTX3L            | 0,85 |
| keratin associated protein 9-8                                                               | KRTAP9-8         | 0,85 |
| translocase of outer mitochondrial membrane 40 homolog (yeast)-like; microRNA 5187           | TOMM40L; MIR5187 | 0,85 |
| RAB33A, member RAS oncogene family                                                           | RAB33A           | 0,85 |
| disco-interacting protein 2 homolog A                                                        | DIP2A            | 0,85 |
| chitinase, acidic                                                                            | CHIA             | 0,85 |
| DNA-damage inducible 1 homolog 1                                                             | DDI1             | 0,85 |

|                                                                                                                                                                                                                                                                                                                                                                                                                                                                                                                                                                        |                                                                                  |      |
|------------------------------------------------------------------------------------------------------------------------------------------------------------------------------------------------------------------------------------------------------------------------------------------------------------------------------------------------------------------------------------------------------------------------------------------------------------------------------------------------------------------------------------------------------------------------|----------------------------------------------------------------------------------|------|
| BCL2-associated transcription factor 1                                                                                                                                                                                                                                                                                                                                                                                                                                                                                                                                 | BCLAF1                                                                           | 0,85 |
| ribosomal protein S2; small nucleolar RNA, H/ACA box 64;<br>small nucleolar RNA, H/ACA box 10                                                                                                                                                                                                                                                                                                                                                                                                                                                                          | RPS2; SNORA64;<br>SNORA10                                                        | 0,85 |
| p21 protein (Cdc42/Rac)-activated kinase 7                                                                                                                                                                                                                                                                                                                                                                                                                                                                                                                             | PAK7                                                                             | 0,85 |
| olfactory receptor, family 5, subfamily M, member 10                                                                                                                                                                                                                                                                                                                                                                                                                                                                                                                   | OR5M10                                                                           | 0,85 |
| G protein-coupled receptor 25                                                                                                                                                                                                                                                                                                                                                                                                                                                                                                                                          | GPR25                                                                            | 0,85 |
| keratin associated protein 10-10                                                                                                                                                                                                                                                                                                                                                                                                                                                                                                                                       | KRTAP10-10                                                                       | 0,85 |
| peroxiredoxin 1                                                                                                                                                                                                                                                                                                                                                                                                                                                                                                                                                        | PRDX1                                                                            | 0,85 |
| protein phosphatase 1, regulatory subunit 3E                                                                                                                                                                                                                                                                                                                                                                                                                                                                                                                           | PPP1R3E                                                                          | 0,85 |
| nucleosome assembly protein 1-like 6                                                                                                                                                                                                                                                                                                                                                                                                                                                                                                                                   | NAP1L6                                                                           | 0,84 |
| solute carrier family 39 (zinc transporter), member 8                                                                                                                                                                                                                                                                                                                                                                                                                                                                                                                  | SLC39A8                                                                          | 0,84 |
| nucleophosmin/nucleoplasmin 3                                                                                                                                                                                                                                                                                                                                                                                                                                                                                                                                          | NPM3                                                                             | 0,84 |
| coiled-coil domain containing 15                                                                                                                                                                                                                                                                                                                                                                                                                                                                                                                                       | CCDC15                                                                           | 0,84 |
| myosin IIIA                                                                                                                                                                                                                                                                                                                                                                                                                                                                                                                                                            | MYO3A                                                                            | 0,84 |
| resistin                                                                                                                                                                                                                                                                                                                                                                                                                                                                                                                                                               | RETN                                                                             | 0,84 |
| hyaluronan synthase 1                                                                                                                                                                                                                                                                                                                                                                                                                                                                                                                                                  | HAS1                                                                             | 0,84 |
| collagen, type V, alpha 3                                                                                                                                                                                                                                                                                                                                                                                                                                                                                                                                              | COL5A3                                                                           | 0,84 |
| olfactory receptor, family 5, subfamily AC, member 2                                                                                                                                                                                                                                                                                                                                                                                                                                                                                                                   | OR5AC2                                                                           | 0,84 |
| transcriptional adaptor 3                                                                                                                                                                                                                                                                                                                                                                                                                                                                                                                                              | TADA3                                                                            | 0,84 |
| chondroadherin                                                                                                                                                                                                                                                                                                                                                                                                                                                                                                                                                         | CHAD                                                                             | 0,84 |
| endothelin 3                                                                                                                                                                                                                                                                                                                                                                                                                                                                                                                                                           | EDN3                                                                             | 0,84 |
| CD163 molecule                                                                                                                                                                                                                                                                                                                                                                                                                                                                                                                                                         | CD163                                                                            | 0,84 |
| Transcript Identified by AceView, Entrez Gene ID(s)<br>100288237; 7700                                                                                                                                                                                                                                                                                                                                                                                                                                                                                                 | ZNF141                                                                           | 0,84 |
| ankyrin repeat and LEM domain containing 1                                                                                                                                                                                                                                                                                                                                                                                                                                                                                                                             | ANKLE1                                                                           | 0,84 |
| aggrecan                                                                                                                                                                                                                                                                                                                                                                                                                                                                                                                                                               | ACAN                                                                             | 0,84 |
| otogelin                                                                                                                                                                                                                                                                                                                                                                                                                                                                                                                                                               | OTOG                                                                             | 0,84 |
| family with sequence similarity 101, member A                                                                                                                                                                                                                                                                                                                                                                                                                                                                                                                          | FAM101A                                                                          | 0,84 |
| Homo sapiens TBC1 domain family, member 3H (TBC1D3H), mRNA.; Homo sapiens TBC1 domain family, member 3L (TBC1D3L), mRNA.; Homo sapiens TBC1 domain family, member 3I (TBC1D3I), mRNA.; Homo sapiens TBC1 domain family member-like (LOC101060389), mRNA.; TBC1 domain family member-like; Homo sapiens TBC1 domain family, member 3C, mRNA (cDNA clone MGC:87891 IMAGE:5165385), complete cds.; Homo sapiens TBC1 domain family, member 3, mRNA (cDNA clone MGC:87893 IMAGE:5742850), complete cds.; TBC1 domain family, member 3D [Source:HGNC Symbol;Acc:HGNC:28944] | TBC1D3H;<br>TBC1D3L;<br>TBC1D3I;<br>LOC101060389;<br>TBC1D3C;<br>TBC1D3; TBC1D3D | 0,84 |
| hedgehog acyltransferase                                                                                                                                                                                                                                                                                                                                                                                                                                                                                                                                               | HHAT                                                                             | 0,84 |
| mitogen-activated protein kinase kinase kinase kinase 1                                                                                                                                                                                                                                                                                                                                                                                                                                                                                                                | MAP4K1                                                                           | 0,84 |
| GDP-mannose pyrophosphorylase A                                                                                                                                                                                                                                                                                                                                                                                                                                                                                                                                        | GMPPA                                                                            | 0,84 |
| RALY heterogeneous nuclear ribonucleoprotein                                                                                                                                                                                                                                                                                                                                                                                                                                                                                                                           | RALY                                                                             | 0,84 |
| PARP1 binding protein                                                                                                                                                                                                                                                                                                                                                                                                                                                                                                                                                  | PARPBP                                                                           | 0,84 |

|                                                                                         |          |      |
|-----------------------------------------------------------------------------------------|----------|------|
| nuclear pore complex interacting protein family, member A8                              | NPIPA8   | 0,84 |
| thymocyte selection-associated high mobility group box                                  | TOX      | 0,84 |
| C1q and tumor necrosis factor related protein 4                                         | C1QTNF4  | 0,84 |
| sperm associated antigen 8                                                              | SPAG8    | 0,84 |
| pleckstrin homology domain containing, family A member 7                                | PLEKHA7  | 0,84 |
| angiotensin I converting enzyme 2                                                       | ACE2     | 0,84 |
| N-acetyltransferase 10 (GCN5-related)                                                   | NAT10    | 0,84 |
| family with sequence similarity 19 (chemokine (C-C motif)-like), member A1              | FAM19A1  | 0,84 |
| protein tyrosine phosphatase, receptor type, Q                                          | PTPRQ    | 0,84 |
| Transcript Identified by AceView, Entrez Gene ID(s) 26084                               | SGEF     | 0,84 |
| intraflagellar transport 140                                                            | IFT140   | 0,84 |
| homeobox A13                                                                            | HOXA13   | 0,84 |
| secernin 2                                                                              | SCRN2    | 0,84 |
| DnaJ (Hsp40) homolog, subfamily C, member 5 gamma                                       | DNAJC5G  | 0,84 |
| 5-methyltetrahydrofolate-homocysteine methyltransferase reductase                       | MTRR     | 0,84 |
| indoleamine 2,3-dioxygenase 2                                                           | IDO2     | 0,84 |
| COX19 cytochrome c oxidase assembly factor                                              | COX19    | 0,84 |
| mitochondrial ribosomal protein L2                                                      | MRPL2    | 0,84 |
| olfactory receptor, family 6, subfamily C, member 2                                     | OR6C2    | 0,84 |
| guanine nucleotide binding protein (G protein), alpha activating activity polypeptide O | GNAO1    | 0,84 |
| RNA binding motif protein 25                                                            | RBM25    | 0,84 |
| hydroxymethylbilane synthase                                                            | HMBS     | 0,84 |
| semenogelin II                                                                          | SEMG2    | 0,84 |
| left-right determination factor 2                                                       | LEFTY2   | 0,84 |
| abhydrolase domain containing 13                                                        | ABHD13   | 0,84 |
| histone cluster 3, H2a                                                                  | HIST3H2A | 0,84 |
| dual specificity tyrosine-(Y)-phosphorylation regulated kinase 1B                       | DYRK1B   | 0,84 |
| PCF11 cleavage and polyadenylation factor subunit                                       | PCF11    | 0,84 |
| microtubule associated tumor suppressor 1                                               | MTUS1    | 0,84 |
| solute carrier family 9, subfamily A (NHE9, cation proton antiporter 9), member 9       | SLC9A9   | 0,84 |
| branched chain keto acid dehydrogenase E1, beta polypeptide                             | BCKDHB   | 0,84 |
| olfactory receptor, family 2, subfamily F, member 1 (gene/pseudogene)                   | OR2F1    | 0,84 |
| v-mos Moloney murine sarcoma viral oncogene homolog                                     | MOS      | 0,84 |
| PEST proteolytic signal containing nuclear protein                                      | PCNP     | 0,84 |

|                                                                                                           |                  |      |
|-----------------------------------------------------------------------------------------------------------|------------------|------|
| polypeptide N-acetylgalactosaminyltransferase 9                                                           | GALNT9           | 0,84 |
| zinc finger, imprinted 3                                                                                  | ZIM3             | 0,84 |
| N-acetylated alpha-linked acidic dipeptidase-like 2                                                       | NAALADL2         | 0,84 |
| tubulin polymerization-promoting protein family member 2                                                  | TPPP2            | 0,84 |
| WD repeat domain 82                                                                                       | WDR82            | 0,84 |
| synaptotagmin VIII                                                                                        | SYT8             | 0,84 |
| 2,3-bisphosphoglycerate mutase                                                                            | BPGM             | 0,84 |
| endoplasmic reticulum protein 44                                                                          | ERP44            | 0,84 |
| DiGeorge syndrome critical region gene 6                                                                  | DGCR6            | 0,84 |
| carbonic anhydrase VB, mitochondrial                                                                      | CA5B             | 0,84 |
| Transcript Identified by AceView, Entrez Gene ID(s) 56474                                                 | CTPS2            | 0,84 |
| chromosome 17 open reading frame 99                                                                       | C17orf99         | 0,84 |
| fatty acid binding protein 4, adipocyte                                                                   | FABP4            | 0,84 |
| cytochrome P450, family 1, subfamily A, polypeptide 2                                                     | CYP1A2           | 0,84 |
| cerebellin 2 precursor                                                                                    | CBLN2            | 0,84 |
| long intergenic non-protein coding RNA 260                                                                | LINC00260        | 0,84 |
| trafficking protein particle complex 9                                                                    | TRAPPC9          | 0,84 |
| exocyst complex component 4                                                                               | EXOC4            | 0,84 |
| zinc finger protein 638                                                                                   | ZNF638           | 0,84 |
| ring finger protein 212                                                                                   | RNF212           | 0,84 |
| UDP-Gal:betaGlcNAc beta 1,3-galactosyltransferase 4                                                       | B3GALT4          | 0,84 |
| methyl-CpG binding protein 2                                                                              | MECP2            | 0,84 |
| peptidylprolyl isomerase A (cyclophilin A)-like 4F;<br>peptidylprolyl isomerase A (cyclophilin A)-like 4D | PPIAL4F; PPIAL4D | 0,84 |
| interleukin 17C                                                                                           | IL17C            | 0,84 |
| WD repeat domain 3                                                                                        | WDR3             | 0,84 |
| parathymosin                                                                                              | PTMS             | 0,84 |
| ubiquitin specific peptidase 42                                                                           | USP42            | 0,84 |
| synaptopodin 2                                                                                            | SYNPO2           | 0,84 |
| Transcript Identified by AceView, Entrez Gene ID(s) 79598                                                 | CEP97            | 0,84 |

|                                                                                                                                                                                                                                                                                                                                                                                                                                                                                                                                                                                                                                                                                                                                                                                                          |                                |      |
|----------------------------------------------------------------------------------------------------------------------------------------------------------------------------------------------------------------------------------------------------------------------------------------------------------------------------------------------------------------------------------------------------------------------------------------------------------------------------------------------------------------------------------------------------------------------------------------------------------------------------------------------------------------------------------------------------------------------------------------------------------------------------------------------------------|--------------------------------|------|
| hepatoma-derived growth factor-related protein 2;<br>Hepatoma-derived growth factor-related protein 2<br>[Source:UniProtKB/Swiss-Prot;Acc:Q7Z4V5];<br>Salzman2013 ANNOTATED, CDS, coding, OVCODE,<br>OVEXON, UTR5 best transcript NM_001001520;<br>Salzman2013 ANNOTATED, CDS, coding, OVCODE,<br>OVERLAPTX, OVEXON, UTR3, UTR5 best transcript<br>NM_001001520; Salzman2013 ANNOTATED, CDS, coding,<br>INTERNAL, OVCODE, OVEXON best transcript<br>NM_001001520; Salzman2013 ALT_ACCEPTOR, CDS,<br>coding, INTERNAL, intronic, OVCODE, OVEXON best<br>transcript NM_001001520; Salzman2013 ANNOTATED,<br>CDS, coding, OVCODE, OVERLAPTX, OVEXON, UTR3 best<br>transcript NM_001001520; Salzman2013 ALT_DONOR,<br>CDS, coding, INTERNAL, OVCODE, OVERLAPTX, OVEXON,<br>UTR3 best transcript NM_001001520 | HDGFRP2                        | 0,84 |
| mitochondrial ribosomal protein L42                                                                                                                                                                                                                                                                                                                                                                                                                                                                                                                                                                                                                                                                                                                                                                      | MRPL42                         | 0,84 |
| nucleoporin 54kDa                                                                                                                                                                                                                                                                                                                                                                                                                                                                                                                                                                                                                                                                                                                                                                                        | NUP54                          | 0,84 |
| ribosomal protein S25                                                                                                                                                                                                                                                                                                                                                                                                                                                                                                                                                                                                                                                                                                                                                                                    | RPS25                          | 0,84 |
| PDZ domain containing 4                                                                                                                                                                                                                                                                                                                                                                                                                                                                                                                                                                                                                                                                                                                                                                                  | PDZD4                          | 0,84 |
| olfactory receptor, family 5, subfamily D, member 13<br>(gene/pseudogene)                                                                                                                                                                                                                                                                                                                                                                                                                                                                                                                                                                                                                                                                                                                                | OR5D13                         | 0,84 |
| YTH domain containing 1                                                                                                                                                                                                                                                                                                                                                                                                                                                                                                                                                                                                                                                                                                                                                                                  | YTHDC1                         | 0,84 |
| lysine (K)-specific demethylase 5A                                                                                                                                                                                                                                                                                                                                                                                                                                                                                                                                                                                                                                                                                                                                                                       | KDM5A                          | 0,84 |
| S-antigen; retina and pineal gland (arrestin)                                                                                                                                                                                                                                                                                                                                                                                                                                                                                                                                                                                                                                                                                                                                                            | SAG                            | 0,84 |
| kallikrein related peptidase 4                                                                                                                                                                                                                                                                                                                                                                                                                                                                                                                                                                                                                                                                                                                                                                           | KLK4                           | 0,84 |
| nuclear GTPase, germinal center associated                                                                                                                                                                                                                                                                                                                                                                                                                                                                                                                                                                                                                                                                                                                                                               | NUGGC                          | 0,84 |
| contactin 3 (plasmacytoma associated)                                                                                                                                                                                                                                                                                                                                                                                                                                                                                                                                                                                                                                                                                                                                                                    | CNTN3                          | 0,84 |
| phospholipase D2                                                                                                                                                                                                                                                                                                                                                                                                                                                                                                                                                                                                                                                                                                                                                                                         | PLD2                           | 0,84 |
| solute carrier family 1 (glial high affinity glutamate<br>transporter), member 2                                                                                                                                                                                                                                                                                                                                                                                                                                                                                                                                                                                                                                                                                                                         | SLC1A2                         | 0,84 |
| nth-like DNA glycosylase 1                                                                                                                                                                                                                                                                                                                                                                                                                                                                                                                                                                                                                                                                                                                                                                               | NTHL1                          | 0,84 |
| D-amino-acid oxidase                                                                                                                                                                                                                                                                                                                                                                                                                                                                                                                                                                                                                                                                                                                                                                                     | DAO                            | 0,84 |
| Zhang2013 ALT_ACCEPTOR, ALT_DONOR, coding,<br>INTERNAL, intronic best transcript NM_002953                                                                                                                                                                                                                                                                                                                                                                                                                                                                                                                                                                                                                                                                                                               | RPS6KA1                        | 0,84 |
| 3-hydroxyacyl-CoA dehydratase 2                                                                                                                                                                                                                                                                                                                                                                                                                                                                                                                                                                                                                                                                                                                                                                          | HACD2                          | 0,84 |
| sarcolipin                                                                                                                                                                                                                                                                                                                                                                                                                                                                                                                                                                                                                                                                                                                                                                                               | SLN                            | 0,84 |
| polymerase (RNA) II (DNA directed) polypeptide F;<br>microRNA 4534; microRNA 6820                                                                                                                                                                                                                                                                                                                                                                                                                                                                                                                                                                                                                                                                                                                        | POLR2F;<br>MIR4534;<br>MIR6820 | 0,84 |
| phosphatase and actin regulator 4                                                                                                                                                                                                                                                                                                                                                                                                                                                                                                                                                                                                                                                                                                                                                                        | PHACTR4                        | 0,84 |
| zinc finger protein 404                                                                                                                                                                                                                                                                                                                                                                                                                                                                                                                                                                                                                                                                                                                                                                                  | ZNF404                         | 0,84 |
| adducin 1 (alpha)                                                                                                                                                                                                                                                                                                                                                                                                                                                                                                                                                                                                                                                                                                                                                                                        | ADD1                           | 0,84 |
| hydroxymethylbilane synthase                                                                                                                                                                                                                                                                                                                                                                                                                                                                                                                                                                                                                                                                                                                                                                             | HMBS                           | 0,84 |
| WD repeat domain 93                                                                                                                                                                                                                                                                                                                                                                                                                                                                                                                                                                                                                                                                                                                                                                                      | WDR93                          | 0,84 |



|                                                                                              |          |      |
|----------------------------------------------------------------------------------------------|----------|------|
| glutamate receptor, metabotropic 3                                                           | GRM3     | 0,84 |
| copine III                                                                                   | CPNE3    | 0,84 |
| phosphodiesterase 8A                                                                         | PDE8A    | 0,84 |
| UDP glucuronosyltransferase 2 family, polypeptide B17                                        | UGT2B17  | 0,84 |
| zinc finger with KRAB and SCAN domains 2                                                     | ZKSCAN2  | 0,84 |
| WEE1 G2 checkpoint kinase                                                                    | WEE1     | 0,84 |
| zinc finger protein 660                                                                      | ZNF660   | 0,84 |
| sorting nexin 5                                                                              | SNX5     | 0,84 |
| C-type lectin domain family 2, member A                                                      | CLEC2A   | 0,84 |
| putative homeodomain transcription factor 1                                                  | PHTF1    | 0,84 |
| InaF-motif containing 2                                                                      | INAFM2   | 0,84 |
| small EDRK-rich factor 2                                                                     | SERF2    | 0,84 |
| Transcript Identified by AceView, Entrez Gene ID(s)<br>729475                                | RAD51AP2 | 0,84 |
| autoimmune regulator                                                                         | AIRE     | 0,84 |
| solute carrier family 1 (glutamate/neutral amino acid transporter), member 4                 | SLC1A4   | 0,84 |
| ubiquitin conjugating enzyme E2 variant 2                                                    | UBE2V2   | 0,84 |
| chromosome 5 open reading frame 45                                                           | C5orf45  | 0,84 |
| chromosome 9 open reading frame 50                                                           | C9orf50  | 0,84 |
| Jeck2013 ALT_ACCEPTOR, ALT_DONOR, coding, INTERNAL, intronic best transcript NM_001100164    | PHACTR2  | 0,84 |
| testis expressed 36                                                                          | TEX36    | 0,84 |
| olfactory receptor, family 13, subfamily C, member 4                                         | OR13C4   | 0,84 |
| proline rich 15-like                                                                         | PRR15L   | 0,84 |
| SLIT and NTRK-like family, member 1                                                          | SLITRK1  | 0,84 |
| mitochondrial ribosomal protein S35                                                          | MRPS35   | 0,84 |
| canopy FGF signaling regulator 4                                                             | CNPY4    | 0,84 |
| signal transducer and activator of transcription 5B                                          | STAT5B   | 0,84 |
| EP300 interacting inhibitor of differentiation 2B                                            | EID2B    | 0,84 |
| Ts translation elongation factor, mitochondrial                                              | TFSM     | 0,84 |
| pre T-cell antigen receptor alpha                                                            | PTCRA    | 0,84 |
| family with sequence similarity 83, member E                                                 | FAM83E   | 0,84 |
| mitochondrial translational release factor 1-like                                            | MTRF1L   | 0,84 |
| sex comb on midleg-like 2 (Drosophila)                                                       | SCML2    | 0,84 |
| IQ motif containing B1                                                                       | IQCB1    | 0,84 |
| testis expressed 13A                                                                         | TEX13A   | 0,84 |
| DDB1 and CUL4 associated factor 12-like 2                                                    | DCAF12L2 | 0,84 |
| Memczak2013 ANTISENSE, CDS, coding, INTERNAL, intronic best transcript NM_004475             | FLOT2    | 0,84 |
| parvin, beta                                                                                 | PARVB    | 0,84 |
| coiled-coil domain containing 38                                                             | CCDC38   | 0,84 |
| huntingtin interacting protein 1 related                                                     | HIP1R    | 0,84 |
| Memczak2013 ALT_ACCEPTOR, ALT_DONOR, coding, INTERNAL, intronic best transcript NM_001164162 | PPP6R3   | 0,84 |

|                                                                                                |             |      |
|------------------------------------------------------------------------------------------------|-------------|------|
| NADH dehydrogenase (ubiquinone) complex I, assembly factor 2                                   | NDUFAF2     | 0,84 |
| zinc finger protein 385D                                                                       | ZNF385D     | 0,84 |
| E74-like factor 2 (ets domain transcription factor)                                            | ELF2        | 0,84 |
| basigin (Ok blood group)                                                                       | BSG         | 0,84 |
| signal-regulatory protein delta                                                                | SIRPD       | 0,84 |
| SIL1 nucleotide exchange factor                                                                | SIL1        | 0,84 |
| kidney associated antigen 1                                                                    | KAAG1       | 0,84 |
| CUGBP, Elav-like family member 5                                                               | CELF5       | 0,84 |
| pepsinogen 3, group I (pepsinogen A); pepsinogen 4, group I (pepsinogen A)                     | PGA3; PGA4  | 0,84 |
| HOXA cluster antisense RNA 3                                                                   | HOXA-AS3    | 0,84 |
| INO80B-WBP1 readthrough (NMD candidate)                                                        | INO80B-WBP1 | 0,84 |
| C-type lectin domain family 12, member B                                                       | CLEC12B     | 0,84 |
| family with sequence similarity 209, member B                                                  | FAM209B     | 0,84 |
| ribosomal protein L18                                                                          | RPL18       | 0,84 |
| microsomal glutathione S-transferase 1                                                         | MGST1       | 0,84 |
| MYCBP-associated, testis expressed 1                                                           | MAATS1      | 0,84 |
| solute carrier family 35, member E3                                                            | SLC35E3     | 0,84 |
| DCN1, defective in cullin neddylation 1, domain containing 5                                   | DCUN1D5     | 0,84 |
| zinc finger protein 467                                                                        | ZNF467      | 0,84 |
| olfactory receptor, family 51, subfamily E, member 1                                           | OR51E1      | 0,84 |
| centrosomal protein 95kDa                                                                      | CEP95       | 0,84 |
| ATP binding cassette subfamily D member 1                                                      | ABCD1       | 0,84 |
| FYN binding protein                                                                            | FYB         | 0,84 |
| mitochondrial ribosomal protein L36                                                            | MRPL36      | 0,84 |
| peptidyl arginine deiminase, type I                                                            | PADI1       | 0,84 |
| CDGSH iron sulfur domain 2                                                                     | CISD2       | 0,84 |
| jumonji domain containing 4                                                                    | JMJD4       | 0,84 |
| keratin associated protein 13-2                                                                | KRTAP13-2   | 0,84 |
| homocysteine-inducible, endoplasmic reticulum stress-inducible, ubiquitin-like domain member 1 | HERPUD1     | 0,84 |
| F-box protein 44                                                                               | FBXO44      | 0,84 |
| zinc finger protein 320                                                                        | ZNF320      | 0,84 |
| homeobox A2                                                                                    | HOXA2       | 0,84 |
| poly(A)-specific ribonuclease                                                                  | PARN        | 0,84 |
| echinoderm microtubule associated protein like 1                                               | EML1        | 0,84 |
| hexamethylene bis-acetamide inducible 1                                                        | HEXIM1      | 0,84 |
| dual specificity tyrosine-(Y)-phosphorylation regulated kinase 2                               | DYRK2       | 0,84 |
| 5-oxoprolinase (ATP-hydrolysing)                                                               | OPLAH       | 0,84 |
| interleukin 26                                                                                 | IL26        | 0,84 |
| retinal pigment epithelium-specific protein 65kDa                                              | RPE65       | 0,84 |

|                                                                                   |                |      |
|-----------------------------------------------------------------------------------|----------------|------|
| sphingomyelin phosphodiesterase 3, neutral membrane (neutral sphingomyelinase II) | SMPD3          | 0,84 |
| ER membrane protein complex subunit 6                                             | EMC6           | 0,84 |
| SET domain containing 2                                                           | SETD2          | 0,84 |
| defensin, beta 115                                                                | DEFB115        | 0,84 |
| ST8 alpha-N-acetyl-neuraminide alpha-2,8-sialyltransferase 6                      | ST8SIA6        | 0,84 |
| docking protein 1                                                                 | DOK1           | 0,84 |
| coiled-coil domain containing 78                                                  | CCDC78         | 0,84 |
| ALG12, alpha-1,6-mannosyltransferase                                              | ALG12          | 0,84 |
| apolipoprotein L, 5                                                               | APOL5          | 0,84 |
| WD repeat, sterile alpha motif and U-box domain containing 1                      | WDSUB1         | 0,84 |
| lecithin retinol acyltransferase (phosphatidylcholine--retinol O-acyltransferase) | LRAT           | 0,84 |
| BRCA1 associated protein 1                                                        | BAP1           | 0,84 |
| tripartite motif containing 64                                                    | TRIM64         | 0,84 |
| GRIP1 associated protein 1                                                        | GRIPAP1        | 0,84 |
| solute carrier family 35 (GDP-fucose transporter), member C1                      | SLC35C1        | 0,84 |
| C1q and tumor necrosis factor related protein 7                                   | C1QTNF7        | 0,84 |
| complement component 1, q subcomponent, C chain                                   | C1QC           | 0,84 |
| potassium channel, inwardly rectifying subfamily J, member 9                      | KCNJ9          | 0,84 |
| ubiquitin specific peptidase 50                                                   | USP50          | 0,84 |
| GIN5 complex subunit 3 (Psf3 homolog)                                             | GIN53          | 0,84 |
| ribosomal RNA processing 8, methyltransferase, homolog (yeast)                    | RRP8           | 0,84 |
| ribosomal protein L10; small nucleolar RNA, H/ACA box 70                          | RPL10; SNORA70 | 0,84 |
| mitochondrial ribosome-associated GTPase 2                                        | MTG2           | 0,84 |
| Mdm1 nuclear protein                                                              | MDM1           | 0,84 |
| long intergenic non-protein coding RNA 1225                                       | LINC01225      | 0,84 |
| growth factor receptor bound protein 2                                            | GRB2           | 0,84 |
| ADP-ribosylhydrolase like 2                                                       | ADPRHL2        | 0,84 |
| COMM domain containing 9                                                          | COMMD9         | 0,84 |
| cleavage and polyadenylation specific factor 7                                    | CPSF7          | 0,84 |
| Ral GEF with PH domain and SH3 binding motif 2                                    | RALGPS2        | 0,84 |
| signal-induced proliferation-associated 1 like 1                                  | SIPA1L1        | 0,84 |
| ribosomal protein L8; microRNA 6850                                               | RPL8; MIR6850  | 0,84 |
| amyloid beta (A4) precursor protein-binding, family A, member 1                   | APBA1          | 0,84 |
| zinc finger, MYM-type 4                                                           | ZMYM4          | 0,84 |
| pecanex-like 4 (Drosophila)                                                       | PCNXL4         | 0,84 |
| protocadherin beta 1                                                              | PCDHB1         | 0,84 |

|                                                                       |                    |      |
|-----------------------------------------------------------------------|--------------------|------|
| olfactory receptor, family 2, subfamily L, member 3                   | OR2L3              | 0,84 |
| CD38 molecule                                                         | CD38               | 0,84 |
| forkhead box O6                                                       | FOXO6              | 0,83 |
| SEC24 homolog B, COPII coat complex component                         | SEC24B             | 0,83 |
| olfactory receptor, family 8, subfamily B, member 3                   | OR8B3              | 0,83 |
| ribosomal protein L26                                                 | RPL26              | 0,83 |
| GS homeobox 2                                                         | GSX2               | 0,83 |
| adenylate kinase 7                                                    | AK7                | 0,83 |
| short chain dehydrogenase/reductase family 39U, member 1              | SDR39U1            | 0,83 |
| chromosome 16 open reading frame 13                                   | C16orf13           | 0,83 |
| small integral membrane protein 1 (Vel blood group)                   | SMIM1              | 0,83 |
| family with sequence similarity 26, member E                          | FAM26E             | 0,83 |
| chromosome 11 open reading frame 42                                   | C11orf42           | 0,83 |
| cytoplasmic polyadenylation element binding protein 3                 | CPEB3              | 0,83 |
| maltase-glucoamylase                                                  | MGAM               | 0,83 |
| estrogen-related receptor alpha                                       | ESRRA              | 0,83 |
| family with sequence similarity 153, member C, pseudogene             | FAM153C            | 0,83 |
| WD repeat domain 89                                                   | WDR89              | 0,83 |
| PDZ and LIM domain 2 (mystique)                                       | PDLIM2             | 0,83 |
| RBPJ interacting and tubulin associated 1                             | RITA1              | 0,83 |
| adhesion G protein-coupled receptor L3                                | ADGRL3             | 0,83 |
| tubulin, gamma 2                                                      | TUBG2              | 0,83 |
| SMC5-SMC6 complex localization factor 1                               | SLF1               | 0,83 |
| chromosome 1 open reading frame 109                                   | C1orf109           | 0,83 |
| protein kinase C, theta                                               | PRKCQ              | 0,83 |
| retinoblastoma-like 2                                                 | RBL2               | 0,83 |
| exocyst complex component 6B                                          | EXOC6B             | 0,83 |
| Transcript Identified by AceView, Entrez Gene ID(s) 1997; 100128628   | ELF1               | 0,83 |
| ubiquitin protein ligase E3C                                          | UBE3C              | 0,83 |
| phospholipid phosphatase related 5                                    | PLPPR5             | 0,83 |
| ATP binding cassette subfamily G member 4                             | ABCG4              | 0,83 |
| neuronatin                                                            | NNAT               | 0,83 |
| kinase D-interacting substrate 220kDa                                 | KIDINS220          | 0,83 |
| Transcript Identified by AceView, Entrez Gene ID(s) 4702              | NDUFA8             | 0,83 |
| ribosomal protein S11; small nucleolar RNA, C/D box 35B               | RPS11;<br>SNORD35B | 0,83 |
| solute carrier family 35, member G3                                   | SLC35G3            | 0,83 |
| UDP-Gal:betaGlcNAc beta 1,3-galactosyltransferase 2                   | B3GALT2            | 0,83 |
| olfactory receptor, family 8, subfamily B, member 4 (gene/pseudogene) | OR8B4              | 0,83 |
| growth differentiation factor 6                                       | GDF6               | 0,83 |

|                                                                                           |                      |      |
|-------------------------------------------------------------------------------------------|----------------------|------|
| atypical chemokine receptor 3                                                             | ACKR3                | 0,83 |
| translocase of inner mitochondrial membrane 50 homolog ( <i>S. cerevisiae</i> )           | TIMM50               | 0,83 |
| kelch-like family member 26                                                               | KLHL26               | 0,83 |
| Rho GTPase activating protein 11B                                                         | ARHGAP11B            | 0,83 |
| ribosomal protein L37                                                                     | RPL37                | 0,83 |
| DiGeorge syndrome critical region gene 6-like                                             | DGCR6L               | 0,83 |
| Transcript Identified by AceView, Entrez Gene ID(s) 10485; novel transcript               | C1orf61; RP11-98G7.1 | 0,83 |
| gap junction protein beta 2                                                               | GJB2                 | 0,83 |
| ATPase, class VI, type 11A                                                                | ATP11A               | 0,83 |
| mannosidase, alpha, class 2B, member 1                                                    | MAN2B1               | 0,83 |
| neuronal PAS domain protein 2                                                             | NPAS2                | 0,83 |
| protease, serine, 56                                                                      | PRSS56               | 0,83 |
| nuclear receptor binding protein 1                                                        | NRBP1                | 0,83 |
| lipoprotein, Lp(a)                                                                        | LPA                  | 0,83 |
| impact RWD domain protein                                                                 | IMPACT               | 0,83 |
| adenylate kinase 2                                                                        | AK2                  | 0,83 |
| cerebral cavernous malformation 2-like                                                    | CCM2L                | 0,83 |
| cytochrome P450, family 7, subfamily B, polypeptide 1                                     | CYP7B1               | 0,83 |
| chromosome 3 open reading frame 14                                                        | C3orf14              | 0,83 |
| zinc finger and SCAN domain containing 12                                                 | ZSCAN12              | 0,83 |
| growth arrest and DNA-damage-inducible, gamma interacting protein 1                       | GADD45GIP1           | 0,83 |
| olfactory receptor, family 4, subfamily K, member 5                                       | OR4K5                | 0,83 |
| coatamer protein complex subunit epsilon                                                  | COPE                 | 0,83 |
| lactoperoxidase                                                                           | LPO                  | 0,83 |
| leucine-rich repeat, immunoglobulin-like and transmembrane domains 3                      | LRIT3                | 0,83 |
| solute carrier family 16, member 9                                                        | SLC16A9              | 0,83 |
| zinc finger protein 780A                                                                  | ZNF780A              | 0,83 |
| pentatricopeptide repeat domain 1                                                         | PTCD1                | 0,83 |
| Memczak2013 ALT_ACCEPTOR, ALT_DONOR, coding, INTERNAL, intronic best transcript NM_004972 | JAK2                 | 0,83 |
| exosome component 3                                                                       | EXOSC3               | 0,83 |
| phosphatidylinositol glycan anchor biosynthesis class U                                   | PIGU                 | 0,83 |
| nuclear transcription factor Y subunit alpha                                              | NFYA                 | 0,83 |
| insulin-like growth factor binding protein, acid labile subunit                           | IGFALS               | 0,83 |
| progesterone receptor                                                                     | PGR                  | 0,83 |
| serine/threonine kinase 19                                                                | STK19                | 0,83 |
| olfactory receptor, family 52, subfamily I, member 1                                      | OR52I1               | 0,83 |
| leptin receptor; leptin receptor overlapping transcript                                   | LEPR; LEPROT         | 0,83 |
| cholinergic receptor, nicotinic epsilon                                                   | CHRNE                | 0,83 |
| glutathione peroxidase 3                                                                  | GPX3                 | 0,83 |

|                                                                                                           |           |      |
|-----------------------------------------------------------------------------------------------------------|-----------|------|
| Zhang2013 ALT_ACCEPTOR, ALT_DONOR, coding, INTERNAL, intronic best transcript NM_014238                   | KSR1      | 0,83 |
| NADH dehydrogenase (ubiquinone) 1 alpha subcomplex, 10, 42kDa                                             | NDUFA10   | 0,83 |
| CART prepropeptide                                                                                        | CARTPT    | 0,83 |
| olfactory receptor, family 6, subfamily J, member 1 (gene/pseudogene)                                     | OR6J1     | 0,83 |
| acidic nuclear phosphoprotein 32 family member D                                                          | ANP32D    | 0,83 |
| nuclear transcription factor Y subunit gamma                                                              | NFYC      | 0,83 |
| deoxyribonuclease II, lysosomal                                                                           | DNASE2    | 0,83 |
| nuclear pore complex interacting protein family, member A7                                                | NPIPA7    | 0,83 |
| chromosome 21 open reading frame 62                                                                       | C21orf62  | 0,83 |
| diacylglycerol kinase, delta 130kDa                                                                       | DGKD      | 0,83 |
| RAB3A, member RAS oncogene family                                                                         | RAB3A     | 0,83 |
| Transcript Identified by AceView, Entrez Gene ID(s) 8502                                                  | PKP4      | 0,83 |
| crumbs family member 3                                                                                    | CRB3      | 0,83 |
| chromosome 19 open reading frame 71                                                                       | C19orf71  | 0,83 |
| neurofibromin 1                                                                                           | NF1       | 0,83 |
| ANKH inorganic pyrophosphate transport regulator                                                          | ANKH      | 0,83 |
| tyrosyl-tRNA synthetase 2, mitochondrial                                                                  | YARS2     | 0,83 |
| protein tyrosine phosphatase, receptor type, f polypeptide (PTPRF), interacting protein (liprin), alpha 1 | PPFIA1    | 0,83 |
| BRICHOS domain containing 5                                                                               | BRICD5    | 0,83 |
| collagen, type XX, alpha 1                                                                                | COL20A1   | 0,83 |
| collagen, type XVIII, alpha 1                                                                             | COL18A1   | 0,83 |
| RNA binding motif (RNP1, RRM) protein 3                                                                   | RBM3      | 0,83 |
| olfactory receptor, family 8, subfamily D, member 1                                                       | OR8D1     | 0,83 |
| zinc finger, MIZ-type containing 1                                                                        | ZMIZ1     | 0,83 |
| formin like 3                                                                                             | FMNL3     | 0,83 |
| natural cytotoxicity triggering receptor 1                                                                | NCR1      | 0,83 |
| long intergenic non-protein coding RNA 273                                                                | LINC00273 | 0,83 |
| SRR1 domain containing                                                                                    | SRRD      | 0,83 |
| pre-mRNA processing factor 19                                                                             | PRPF19    | 0,83 |
| mitogen-activated protein kinase 9                                                                        | MAPK9     | 0,83 |
| dynein, light chain, roadblock-type 2                                                                     | DYNLRB2   | 0,83 |
| tripartite motif containing 31                                                                            | TRIM31    | 0,83 |
| transmembrane protein 123                                                                                 | TMEM123   | 0,83 |
| pepsinogen 5, group I (pepsinogen A)                                                                      | PGA5      | 0,83 |
| basic leucine zipper and W2 domains 2                                                                     | BZW2      | 0,83 |
| surfeit 1                                                                                                 | SURF1     | 0,83 |
| U2 small nuclear RNA auxiliary factor 1                                                                   | U2AF1     | 0,83 |
| Memczak2013 ANTISENSE, CDS, coding, INTERNAL, intronic best transcript NM_139235                          | NOL6      | 0,83 |

|                                                                                                          |                        |      |
|----------------------------------------------------------------------------------------------------------|------------------------|------|
| transmembrane protein 168                                                                                | TMEM168                | 0,83 |
| activating signal cointegrator 1 complex subunit 3                                                       | ASCC3                  | 0,83 |
| carbohydrate (chondroitin 4) sulfotransferase 12                                                         | CHST12                 | 0,83 |
| steroid 5 alpha-reductase 3                                                                              | SRD5A3                 | 0,83 |
| receptor (chemosensory) transporter protein 4                                                            | RTP4                   | 0,83 |
| uncharacterized LOC401081; uncharacterized LOC401081<br>[Source:EntrezGene;Acc:401081]; novel transcript | FLJ22763; RP11-59E19.1 | 0,83 |
| zinc finger and BTB domain containing 47                                                                 | ZBTB47                 | 0,83 |
| anti-silencing function 1B histone chaperone                                                             | ASF1B                  | 0,83 |
| tudor domain containing 10                                                                               | TDRD10                 | 0,83 |
| methyltransferase like 15                                                                                | METTL15                | 0,83 |
| protease, serine, 8                                                                                      | PRSS8                  | 0,83 |
| follistatin like 1; microRNA 198                                                                         | FSTL1; MIR198          | 0,83 |
| galactokinase 2                                                                                          | GALK2                  | 0,83 |
| TRPM8 channel-associated factor 2                                                                        | TCAF2                  | 0,83 |
| Transcript Identified by AceView, Entrez Gene ID(s)<br>126231                                            | ZNF573                 | 0,83 |
| surfeit 1                                                                                                | SURF1                  | 0,83 |
| trehalase                                                                                                | TREH                   | 0,83 |
| oxytocin receptor                                                                                        | OXTR                   | 0,83 |
| glycine dehydrogenase (decarboxylating)                                                                  | GLDC                   | 0,83 |
| family with sequence similarity 186, member A                                                            | FAM186A                | 0,83 |
| APH1A gamma secretase subunit                                                                            | APH1A                  | 0,83 |
| ALG10, alpha-1,2-glucosyltransferase                                                                     | ALG10                  | 0,83 |
| Transcript Identified by AceView, Entrez Gene ID(s) 7248                                                 | TSC1                   | 0,83 |
| phosphatidylinositol 4-kinase, catalytic, alpha pseudogene<br>2                                          | PI4KAP2                | 0,83 |
| RNA binding protein, fox-1 homolog (C. elegans) 3                                                        | RBFOX3                 | 0,83 |
| PMS1 homolog 2, mismatch repair system component<br>pseudogene 3                                         | PMS2P3                 | 0,83 |
| HLA complex group 9 (non-protein coding)                                                                 | HCG9                   | 0,83 |
| proteasome 26S subunit, ATPase 6                                                                         | PSMC6                  | 0,83 |
| SRC kinase signaling inhibitor 1                                                                         | SRCIN1                 | 0,83 |
| TAR (HIV-1) RNA binding protein 2                                                                        | TARBP2                 | 0,83 |
| chromosome 22 open reading frame 34                                                                      | C22orf34               | 0,83 |
| proline rich 30                                                                                          | PRR30                  | 0,83 |
| docking protein 4                                                                                        | DOK4                   | 0,83 |
| CoA synthase                                                                                             | COASY                  | 0,83 |
| FUN14 domain containing 2                                                                                | FUNDC2                 | 0,83 |
| kin of IRRE like 3 (Drosophila)                                                                          | KIRREL3                | 0,83 |
| exocyst complex component 3                                                                              | EXOC3                  | 0,83 |

|                                                                                                                                                                                                                       |                                  |      |
|-----------------------------------------------------------------------------------------------------------------------------------------------------------------------------------------------------------------------|----------------------------------|------|
| uncharacterized protein LOC158434 [Source:RefSeq peptide;Acc:NP_001243337]; uncharacterized LOC158434; Protein LOC158434 [Source:UniProtKB/TrEMBL;Acc:A0A087X204]; novel transcript; Transcript Identified by AceView | RP11-569G13.3; LOC158434; setora | 0,83 |
| amyloid P component, serum                                                                                                                                                                                            | APCS                             | 0,83 |
| zinc finger protein 713                                                                                                                                                                                               | ZNF713                           | 0,83 |
| tripartite motif containing 49                                                                                                                                                                                        | TRIM49                           | 0,83 |
| Transcript Identified by AceView, Entrez Gene ID(s) 51011                                                                                                                                                             | FAHD2A                           | 0,83 |
| forkhead box S1                                                                                                                                                                                                       | FOXS1                            | 0,83 |
| NUT family member 2A                                                                                                                                                                                                  | NUTM2A                           | 0,83 |
| THAP domain containing 7                                                                                                                                                                                              | THAP7                            | 0,83 |
| glutathione peroxidase 5                                                                                                                                                                                              | GPX5                             | 0,83 |
| plexin A1                                                                                                                                                                                                             | PLXNA1                           | 0,83 |
| solute carrier family 25 (mitochondrial carrier; dicarboxylate transporter), member 10                                                                                                                                | SLC25A10                         | 0,83 |
| Fas apoptotic inhibitory molecule                                                                                                                                                                                     | FAIM                             | 0,83 |
| neuroblastoma amplified sequence                                                                                                                                                                                      | NBAS                             | 0,83 |
| ovochymase 1                                                                                                                                                                                                          | OVCH1                            | 0,83 |
| regulator of G-protein signaling 1                                                                                                                                                                                    | RGS1                             | 0,83 |
| family with sequence similarity 231, member B                                                                                                                                                                         | FAM231B                          | 0,83 |
| sucrase-isomaltase (alpha-glucosidase)                                                                                                                                                                                | SI                               | 0,83 |
| late cornified envelope 6A                                                                                                                                                                                            | LCE6A                            | 0,83 |
| eukaryotic translation elongation factor 1 delta (guanine nucleotide exchange protein)                                                                                                                                | EEF1D                            | 0,83 |
| ubiquitin-conjugating enzyme E2R 2                                                                                                                                                                                    | UBE2R2                           | 0,83 |
| ribonuclease H2, subunit B                                                                                                                                                                                            | RNASEH2B                         | 0,83 |
| gem nuclear organelle associated protein 2                                                                                                                                                                            | GEMIN2                           | 0,83 |
| guanine nucleotide binding protein (G protein), gamma 13                                                                                                                                                              | GNG13                            | 0,83 |
| interferon, alpha 16                                                                                                                                                                                                  | IFNA16                           | 0,83 |
| coenzyme Q7 homolog, ubiquinone (yeast)                                                                                                                                                                               | COQ7                             | 0,83 |
| serine/threonine kinase 31                                                                                                                                                                                            | STK31                            | 0,83 |
| CD1d molecule                                                                                                                                                                                                         | CD1D                             | 0,83 |
| Memczak2013 ANTISENSE, CDS, coding, INTERNAL best transcript NM_030821                                                                                                                                                | PLA2G12A                         | 0,83 |
| leucine rich repeat containing 56                                                                                                                                                                                     | LRRC56                           | 0,83 |
| IQ motif and ubiquitin domain containing                                                                                                                                                                              | IQUB                             | 0,83 |
| neuritin 1                                                                                                                                                                                                            | NRN1                             | 0,83 |
| wingless-type MMTV integration site family member 2                                                                                                                                                                   | WNT2                             | 0,83 |
| chromosome 3 open reading frame 70                                                                                                                                                                                    | C3orf70                          | 0,83 |
| fms-related tyrosine kinase 1                                                                                                                                                                                         | FLT1                             | 0,83 |
| DCC netrin 1 receptor                                                                                                                                                                                                 | DCC                              | 0,83 |
| actin-like 6B                                                                                                                                                                                                         | ACTL6B                           | 0,83 |



|                                                                                                                  |            |      |
|------------------------------------------------------------------------------------------------------------------|------------|------|
| cystatin E/M                                                                                                     | CST6       | 0,83 |
| solute carrier family 14 (urea transporter), member 1<br>(Kidd blood group)                                      | SLC14A1    | 0,83 |
| trafficking protein particle complex 4                                                                           | TRAPPC4    | 0,83 |
| carcinoembryonic antigen-related cell adhesion molecule<br>7                                                     | CEACAM7    | 0,83 |
| UBE2F-SCLY readthrough (NMD candidate)                                                                           | UBE2F-SCLY | 0,83 |
| leukocyte immunoglobulin-like receptor, subfamily B<br>(with TM and ITIM domains), member 1                      | LILRB1     | 0,83 |
| natriuretic peptide A                                                                                            | NPPA       | 0,83 |
| kelch-like family member 11                                                                                      | KLHL11     | 0,83 |
| adipocyte plasma membrane associated protein                                                                     | APMAP      | 0,83 |
| folate hydrolase 1B                                                                                              | FOLH1B     | 0,83 |
| NSE4 homolog A, SMC5-SMC6 complex component                                                                      | NSMCE4A    | 0,83 |
| myosin, heavy chain 15                                                                                           | MYH15      | 0,83 |
| TEA domain family member 3                                                                                       | TEAD3      | 0,83 |
| protein tyrosine phosphatase, receptor-type, Z<br>polypeptide 1                                                  | PTPRZ1     | 0,83 |
| Era-like 12S mitochondrial rRNA chaperone 1                                                                      | ERAL1      | 0,83 |
| olfactory receptor, family 2, subfamily T, member 10                                                             | OR2T10     | 0,83 |
| apolipoprotein C-I                                                                                               | APOC1      | 0,83 |
| roundabout guidance receptor 2                                                                                   | ROBO2      | 0,83 |
| zinc finger protein 2                                                                                            | ZNF2       | 0,83 |
| chromosome 8 open reading frame 44                                                                               | C8orf44    | 0,83 |
| family with sequence similarity 167, member A                                                                    | FAM167A    | 0,83 |
| solute carrier family 25 (S-adenosylmethionine carrier),<br>member 26                                            | SLC25A26   | 0,83 |
| late cornified envelope 5A                                                                                       | LCE5A      | 0,83 |
| solute carrier family 35, member A5                                                                              | SLC35A5    | 0,83 |
| olfactory receptor, family 9, subfamily Q, member 1                                                              | OR9Q1      | 0,83 |
| polymerase (RNA) II (DNA directed) polypeptide M                                                                 | POLR2M     | 0,83 |
| phosphoinositide-interacting regulator of transient<br>receptor potential channels                               | PIRT       | 0,83 |
| ST6 (alpha-N-acetyl-neuraminy-2,3-beta-galactosyl-1,3)-<br>N-acetylgalactosaminide alpha-2,6-sialyltransferase 3 | ST6GALNAC3 | 0,83 |
| protocadherin 19                                                                                                 | PCDH19     | 0,83 |
| ubiquitin-conjugating enzyme E2L 6                                                                               | UBE2L6     | 0,83 |
| zinc finger protein 287                                                                                          | ZNF287     | 0,83 |
| contactin 5                                                                                                      | CNTN5      | 0,83 |
| PR domain containing 6                                                                                           | PRDM6      | 0,83 |
| olfactory receptor, family 1, subfamily E, member 2                                                              | OR1E2      | 0,83 |
| olfactory receptor, family 5, subfamily B, member 12                                                             | OR5B12     | 0,83 |
| carcinoembryonic antigen-related cell adhesion molecule<br>16                                                    | CEACAM16   | 0,83 |

|                                                                                         |            |      |
|-----------------------------------------------------------------------------------------|------------|------|
| CREB binding protein                                                                    | CREBBP     | 0,83 |
| AGPAT4 intronic transcript 1                                                            | AGPAT4-IT1 | 0,83 |
| zinc finger and SCAN domain containing 16                                               | ZSCAN16    | 0,83 |
| keratin associated protein 13-3                                                         | KRTAP13-3  | 0,83 |
| CD8a molecule                                                                           | CD8A       | 0,83 |
| RCSD domain containing 1                                                                | RCSD1      | 0,83 |
| glutamate receptor, ionotropic, AMPA 4                                                  | GRIA4      | 0,83 |
| HIG1 hypoxia inducible domain family, member 2A                                         | HIGD2A     | 0,83 |
| zinc finger and BTB domain containing 49                                                | ZBTB49     | 0,83 |
| OTU deubiquitinase 6A                                                                   | OTUD6A     | 0,83 |
| mannosyl (alpha-1,6-)-glycoprotein beta-1,6-N-acetyl-glucosaminyltransferase, isozyme B | MGAT5B     | 0,83 |
| oxidoreductase-like domain containing 1                                                 | OXLD1      | 0,83 |
| X-ray repair complementing defective repair in Chinese hamster cells 6                  | XRCC6      | 0,83 |
| CKLF-like MARVEL transmembrane domain containing 5                                      | CMTM5      | 0,83 |
| RAP2A, member of RAS oncogene family                                                    | RAP2A      | 0,83 |
| mucin 22                                                                                | MUC22      | 0,83 |
| fumarylacetoacetate hydrolase domain containing 2B                                      | FAHD2B     | 0,83 |
| ribosomal protein L7a                                                                   | RPL7A      | 0,82 |
| zinc finger protein 804B                                                                | ZNF804B    | 0,82 |
| family with sequence similarity 111, member A                                           | FAM111A    | 0,82 |
| phosphatidylethanolamine-binding protein 4                                              | PEBP4      | 0,82 |
| olfactory receptor, family 10, subfamily J, member 5                                    | OR10J5     | 0,82 |
| pleckstrin and Sec7 domain containing 3                                                 | PSD3       | 0,82 |
| ring finger protein 8, E3 ubiquitin protein ligase                                      | RNF8       | 0,82 |
| interactor of little elongation complex ELL subunit 1                                   | ICE1       | 0,82 |
| dedicator of cytokinesis 2                                                              | DOCK2      | 0,82 |
| family with sequence similarity 153, member B                                           | FAM153B    | 0,82 |
| 2-5-oligoadenylate synthetase-like                                                      | OASL       | 0,82 |
| CCCTC-binding factor (zinc finger protein)-like                                         | CTCFL      | 0,82 |
| heme binding protein 1                                                                  | HEBP1      | 0,82 |
| aldo-keto reductase family 1, member C1                                                 | AKR1C1     | 0,82 |
| NADH dehydrogenase (ubiquinone) flavoprotein 3, 10kDa                                   | NDUFV3     | 0,82 |
| KIAA0825                                                                                | KIAA0825   | 0,82 |
| secretoglobin, family 1D, member 1                                                      | SCGB1D1    | 0,82 |
| N-acetyltransferase 9 (GCN5-related, putative)                                          | NAT9       | 0,82 |
| DENN/MADD domain containing 4C                                                          | DENND4C    | 0,82 |
| prostaglandin E receptor 3 (subtype EP3)                                                | PTGER3     | 0,82 |
| chromosome 7 open reading frame 62                                                      | C7orf62    | 0,82 |
| Transcript Identified by AceView, Entrez Gene ID(s) 51684                               | SUFU       | 0,82 |
| membrane associated ring finger 9                                                       | MARCH9     | 0,82 |
| small nuclear ribonucleoprotein, U1 70kDa subunit                                       | SNRNP70    | 0,82 |

|                                                                                                                                                                                                                                                                                                                                                |                                      |      |
|------------------------------------------------------------------------------------------------------------------------------------------------------------------------------------------------------------------------------------------------------------------------------------------------------------------------------------------------|--------------------------------------|------|
| chondroadherin-like                                                                                                                                                                                                                                                                                                                            | CHADL                                | 0,82 |
| Transcript Identified by AceView, Entrez Gene ID(s) 79572                                                                                                                                                                                                                                                                                      | ATP13A3                              | 0,82 |
| glycerol-3-phosphate dehydrogenase 1-like                                                                                                                                                                                                                                                                                                      | GPD1L                                | 0,82 |
| septin 9                                                                                                                                                                                                                                                                                                                                       | sept-09                              | 0,82 |
| Transcript Identified by AceView, Entrez Gene ID(s) 6502                                                                                                                                                                                                                                                                                       | SKP2                                 | 0,82 |
| signal sequence receptor, gamma (translocon-associated protein gamma)                                                                                                                                                                                                                                                                          | SSR3                                 | 0,82 |
| myelin oligodendrocyte glycoprotein                                                                                                                                                                                                                                                                                                            | MOG                                  | 0,82 |
| formin 1                                                                                                                                                                                                                                                                                                                                       | FMN1                                 | 0,82 |
| ankyrin repeat and SOCS box containing 8                                                                                                                                                                                                                                                                                                       | ASB8                                 | 0,82 |
| spalt-like transcription factor 3                                                                                                                                                                                                                                                                                                              | SALL3                                | 0,82 |
| zinc finger and BTB domain containing 16                                                                                                                                                                                                                                                                                                       | ZBTB16                               | 0,82 |
| SAM and SH3 domain containing 1                                                                                                                                                                                                                                                                                                                | SASH1                                | 0,82 |
| TEN1 CST complex subunit; cyclin-dependent kinase 3; TEN1-CDK3 readthrough (NMD candidate)                                                                                                                                                                                                                                                     | TEN1; CDK3; TEN1-CDK3                | 0,82 |
| TAO kinase 2                                                                                                                                                                                                                                                                                                                                   | TAOK2                                | 0,82 |
| neudesin neurotrophic factor                                                                                                                                                                                                                                                                                                                   | NENF                                 | 0,82 |
| egl-9 family hypoxia-inducible factor 1                                                                                                                                                                                                                                                                                                        | EGLN1                                | 0,82 |
| deoxyribonuclease I-like 3                                                                                                                                                                                                                                                                                                                     | DNASE1L3                             | 0,82 |
| methyltransferase like 14                                                                                                                                                                                                                                                                                                                      | METTL14                              | 0,82 |
| CTAGE family, member 15                                                                                                                                                                                                                                                                                                                        | CTAGE15                              | 0,82 |
| lin-7 homolog B (C. elegans)                                                                                                                                                                                                                                                                                                                   | LIN7B                                | 0,82 |
| cerebellar degeneration related protein 1                                                                                                                                                                                                                                                                                                      | CDR1                                 | 0,82 |
| deafness, autosomal recessive 59                                                                                                                                                                                                                                                                                                               | DFNB59                               | 0,82 |
| tripartite motif containing 7                                                                                                                                                                                                                                                                                                                  | TRIM7                                | 0,82 |
| Homo sapiens GTP binding protein 6 (putative) (GTPBP6), mRNA.; GTP binding protein 6 (putative) [Source:HGNC Symbol;Acc:HGNC:30189]; Homo sapiens GTP binding protein 6 (putative), mRNA (cDNA clone MGC:1170 IMAGE:3528598), complete cds.; Salzman2013 ANNOTATED, CDS, coding, INTERNAL, OVCODE, OVERLAPTX, OVEXON best transcript NM_012227 | GTPBP6                               | 0,82 |
| adhesion molecule with Ig-like domain 3                                                                                                                                                                                                                                                                                                        | AMIGO3                               | 0,82 |
| zinc finger protein 589                                                                                                                                                                                                                                                                                                                        | ZNF589                               | 0,82 |
| poly(ADP-ribose) polymerase family member 10                                                                                                                                                                                                                                                                                                   | PARP10                               | 0,82 |
| myosin light chain kinase family member 4                                                                                                                                                                                                                                                                                                      | MYLK4                                | 0,82 |
| tumor protein p53                                                                                                                                                                                                                                                                                                                              | TP53                                 | 0,82 |
| uncharacterized LOC101928877; novel transcript; Transcript Identified by AceView, Entrez Gene ID(s) 291                                                                                                                                                                                                                                        | LOC101928877; RP11-386B13.3; SLC25A4 | 0,82 |
| asparagine synthetase domain containing 1                                                                                                                                                                                                                                                                                                      | ASNSD1                               | 0,82 |
| dishevelled segment polarity protein 1; microRNA 6808                                                                                                                                                                                                                                                                                          | DVL1; MIR6808                        | 0,82 |

|                                                                                               |              |      |
|-----------------------------------------------------------------------------------------------|--------------|------|
| zinc finger protein 45                                                                        | ZNF45        | 0,82 |
| SERTA domain containing 4                                                                     | SERTAD4      | 0,82 |
| SEC31 homolog A, COPII coat complex component                                                 | SEC31A       | 0,82 |
| tripartite motif containing 66                                                                | TRIM66       | 0,82 |
| transmembrane protein 38B                                                                     | TMEM38B      | 0,82 |
| zinc finger, DHHC-type containing 23                                                          | ZDHHC23      | 0,82 |
| gem nuclear organelle associated protein 7                                                    | GEMIN7       | 0,82 |
| mitochondrial ribosomal protein L10                                                           | MRPL10       | 0,82 |
| olfactory receptor, family 2, subfamily H, member 2                                           | OR2H2        | 0,82 |
| solute carrier family 22 (organic cation/carnitine transporter), member 16                    | SLC22A16     | 0,82 |
| myosin IIIB                                                                                   | MYO3B        | 0,82 |
| Jeck2013 ANTISENSE, CDS, coding, INTERNAL, intronic, OVCODE, OVEXON best transcript NM_012335 | MYO1F        | 0,82 |
| methylcrotonoyl-CoA carboxylase 1                                                             | MCCC1        | 0,82 |
| sushi domain containing 3                                                                     | SUSD3        | 0,82 |
| solute carrier family 1 (glial high affinity glutamate transporter), member 3                 | SLC1A3       | 0,82 |
| S100P binding protein                                                                         | S100PBP      | 0,82 |
| zinc finger protein 98                                                                        | ZNF98        | 0,82 |
| zinc finger protein 787                                                                       | ZNF787       | 0,82 |
| nuclear prelamin A recognition factor                                                         | NARF         | 0,82 |
| NODAL modulator 1                                                                             | NOMO1        | 0,82 |
| syntrophin, beta 2 (dystrophin-associated protein A1, 59kDa, basic component 2)               | SNTB2        | 0,82 |
| glucosidase, alpha; acid                                                                      | GAA          | 0,82 |
| polyamine modulated factor 1 binding protein 1                                                | PMFBP1       | 0,82 |
| Memczak2013 ALT_ACCEPTOR, ALT_DONOR, coding, INTERNAL, intronic best transcript NM_203487     | PCDH9        | 0,82 |
| transmembrane and coiled-coil domain family 1                                                 | TMCC1        | 0,82 |
| unc-5 netrin receptor D                                                                       | UNC5D        | 0,82 |
| ubiquitin specific peptidase 44                                                               | USP44        | 0,82 |
| calcium and integrin binding family member 2                                                  | CIB2         | 0,82 |
| chromosome 10 open reading frame 126                                                          | C10orf126    | 0,82 |
| MAF1 homolog, negative regulator of RNA polymerase III                                        | MAF1         | 0,82 |
| phosphatidylinositol glycan anchor biosynthesis class O                                       | PIGO         | 0,82 |
| hydroxy-delta-5-steroid dehydrogenase, 3 beta- and steroid delta-isomerase 2                  | HSD3B2       | 0,82 |
| zinc finger protein 474-like                                                                  | LOC100505841 | 0,82 |
| pre-B lymphocyte 1                                                                            | VPREB1       | 0,82 |
| speedy/RINGO cell cycle regulator family member E3                                            | SPDYE3       | 0,82 |
| CASP2 and RIPK1 domain containing adaptor with death domain                                   | CRADD        | 0,82 |

|                                                                                                                                                                                                                                                                                                                                                                                           |                                     |      |
|-------------------------------------------------------------------------------------------------------------------------------------------------------------------------------------------------------------------------------------------------------------------------------------------------------------------------------------------------------------------------------------------|-------------------------------------|------|
| Transcript Identified by AceView, Entrez Gene ID(s) 10580                                                                                                                                                                                                                                                                                                                                 | SORBS1                              | 0,82 |
| polypeptide N-acetylgalactosaminyltransferase 15                                                                                                                                                                                                                                                                                                                                          | GALNT15                             | 0,82 |
| Transcript Identified by AceView, Entrez Gene ID(s) 9736                                                                                                                                                                                                                                                                                                                                  | USP34                               | 0,82 |
| Homo sapiens coiled-coil domain containing 101 pseudogene (LOC388242), non-coding RNA.; Homo sapiens SAGA complex associated factor 29 pseudogene (LOC613038), non-coding RNA.; Transcript Identified by AceView, Entrez Gene ID(s) 613038, RefSeq ID(s) NR_002557; Transcript Identified by AceView, Entrez Gene ID(s) 613038; Protein LOC101929849 [Source:UniProtKB/TrEMBL;Acc:HOYHN6] | LOC388242; LOC613038; RP11-347C12.3 | 0,82 |
| purine-rich element binding protein G                                                                                                                                                                                                                                                                                                                                                     | PURG                                | 0,82 |
| endothelin converting enzyme 1                                                                                                                                                                                                                                                                                                                                                            | ECE1                                | 0,82 |
| fem-1 homolog b (C. elegans)                                                                                                                                                                                                                                                                                                                                                              | FEM1B                               | 0,82 |
| NK3 homeobox 1                                                                                                                                                                                                                                                                                                                                                                            | NKX3-1                              | 0,82 |
| phosphatidylserine synthase 2                                                                                                                                                                                                                                                                                                                                                             | PTDSS2                              | 0,82 |
| IGF like family member 1                                                                                                                                                                                                                                                                                                                                                                  | IGFL1                               | 0,82 |
| nuclear factor of kappa light polypeptide gene enhancer in B-cells inhibitor, epsilon                                                                                                                                                                                                                                                                                                     | NFKBIE                              | 0,82 |
| phosphatidylethanolamine N-methyltransferase                                                                                                                                                                                                                                                                                                                                              | PEMT                                | 0,82 |
| scavenger receptor class B, member 2                                                                                                                                                                                                                                                                                                                                                      | SCARB2                              | 0,82 |
| eukaryotic translation initiation factor 3, subunit E                                                                                                                                                                                                                                                                                                                                     | EIF3E                               | 0,82 |
| synaptotagmin binding, cytoplasmic RNA interacting protein                                                                                                                                                                                                                                                                                                                                | SYNCRIP                             | 0,82 |
| long intergenic non-protein coding RNA 452                                                                                                                                                                                                                                                                                                                                                | LINC00452                           | 0,82 |
| WAP four-disulfide core domain 13                                                                                                                                                                                                                                                                                                                                                         | WFDC13                              | 0,82 |
| psoriasis susceptibility 1 candidate 2                                                                                                                                                                                                                                                                                                                                                    | PSORS1C2                            | 0,82 |
| surfeit 1                                                                                                                                                                                                                                                                                                                                                                                 | SURF1                               | 0,82 |
| protocadherin beta 7                                                                                                                                                                                                                                                                                                                                                                      | PCDHB7                              | 0,82 |
| Salzman2013 ALT_ACCEPTOR, ALT_DONOR, coding, INTERNAL, intronic best transcript NM_004540                                                                                                                                                                                                                                                                                                 | NCAM2                               | 0,82 |
| testis specific protein, Y-linked 10                                                                                                                                                                                                                                                                                                                                                      | TSPY10                              | 0,82 |
| CLPTM1-like                                                                                                                                                                                                                                                                                                                                                                               | CLPTM1L                             | 0,82 |
| antizyme inhibitor 2                                                                                                                                                                                                                                                                                                                                                                      | AZIN2                               | 0,82 |
| RAD54 homolog B (S. cerevisiae); fibrinogen silencer binding protein                                                                                                                                                                                                                                                                                                                      | RAD54B; FSBP                        | 0,82 |
| aldolase B, fructose-bisphosphate                                                                                                                                                                                                                                                                                                                                                         | ALDOB                               | 0,82 |
| chloride intracellular channel 5                                                                                                                                                                                                                                                                                                                                                          | CLIC5                               | 0,82 |
| rabaptin, RAB GTPase binding effector protein 2                                                                                                                                                                                                                                                                                                                                           | RABEP2                              | 0,82 |
| transketolase                                                                                                                                                                                                                                                                                                                                                                             | TKT                                 | 0,82 |
| Ras-related GTP binding A                                                                                                                                                                                                                                                                                                                                                                 | RRAGA                               | 0,82 |

|                                                                                                                                                                                                   |                                       |      |
|---------------------------------------------------------------------------------------------------------------------------------------------------------------------------------------------------|---------------------------------------|------|
| matrin 3; small nucleolar RNA, H/ACA box 74A; small nucleolar RNA host gene 4                                                                                                                     | MATR3;<br>SNORA74A;<br>SNHG4          | 0,82 |
| MHC class I polypeptide-related sequence B                                                                                                                                                        | MICB                                  | 0,82 |
| kelch-like family member 17                                                                                                                                                                       | KLHL17                                | 0,82 |
| pleckstrin homology domain containing, family S member 1                                                                                                                                          | PLEKHS1                               | 0,82 |
| catsper channel auxiliary subunit beta                                                                                                                                                            | CATSPERB                              | 0,82 |
| purinergic receptor P2Y, G-protein coupled, 12                                                                                                                                                    | P2RY12                                | 0,82 |
| myeloid/lymphoid or mixed-lineage leukemia; translocated to, 6                                                                                                                                    | MLLT6                                 | 0,82 |
| family with sequence similarity 46, member A                                                                                                                                                      | FAM46A                                | 0,82 |
| eukaryotic translation initiation factor 4 gamma, 1                                                                                                                                               | EIF4G1                                | 0,82 |
| lysozyme G-like 1                                                                                                                                                                                 | LYG1                                  | 0,82 |
| anaphase promoting complex subunit 10                                                                                                                                                             | ANAPC10                               | 0,82 |
| protein interacting with cyclin A1                                                                                                                                                                | PROCA1                                | 0,82 |
| olfactory receptor, family 2, subfamily L, member 2                                                                                                                                               | OR2L2                                 | 0,82 |
| Memczak2013 ANTISENSE, coding, INTERNAL, UTR5 best transcript NM_005583                                                                                                                           | LYL1                                  | 0,82 |
| hes family bHLH transcription factor 3                                                                                                                                                            | HES3                                  | 0,82 |
| interleukin 18 receptor 1                                                                                                                                                                         | IL18R1                                | 0,82 |
| fin bud initiation factor homolog (zebrafish)                                                                                                                                                     | FIBIN                                 | 0,82 |
| uncharacterized LOC100129940; Transcript Identified by AceView; novel transcript, antisense to HMGA2                                                                                              | LOC100129940;<br>flanu; RP11-366L20.2 | 0,82 |
| ssu-2 homolog (C. elegans)                                                                                                                                                                        | SSUH2                                 | 0,82 |
| Rho GTPase activating protein 15                                                                                                                                                                  | ARHGAP15                              | 0,82 |
| glycoprotein hormones, alpha polypeptide                                                                                                                                                          | CGA                                   | 0,82 |
| enhancer of mRNA decapping 4                                                                                                                                                                      | EDC4                                  | 0,82 |
| asparagine-linked glycosylation 1-like 9, pseudogene                                                                                                                                              | ALG1L9P                               | 0,82 |
| adhesion G protein-coupled receptor B2                                                                                                                                                            | ADGRB2                                | 0,82 |
| DDB1 and CUL4 associated factor 8-like 1                                                                                                                                                          | DCAF8L1                               | 0,82 |
| ets variant 5                                                                                                                                                                                     | ETV5                                  | 0,82 |
| small integral membrane protein 17                                                                                                                                                                | SMIM17                                | 0,82 |
| protein kinase, cAMP-dependent, catalytic, beta                                                                                                                                                   | PRKACB                                | 0,82 |
| Transcript Identified by AceView, Entrez Gene ID(s) 2788                                                                                                                                          | GNG7                                  | 0,82 |
| proteasome subunit beta 4                                                                                                                                                                         | PSMB4                                 | 0,82 |
| uncharacterized DKFZp779M0652; Transcript Identified by AceView, Entrez Gene ID(s) 374387, RefSeq ID(s) NR_027134; novel transcript; uncharacterized DKFZp779M0652 [Source:EntrezGene;Acc:374387] | DKFZp779M0652;<br>CTD-2210P24.4       | 0,82 |
| interleukin 9 receptor                                                                                                                                                                            | IL9R                                  | 0,82 |

|                                                                                                                                                                                                                                                                                                                                                                                                                                                        |                 |      |
|--------------------------------------------------------------------------------------------------------------------------------------------------------------------------------------------------------------------------------------------------------------------------------------------------------------------------------------------------------------------------------------------------------------------------------------------------------|-----------------|------|
| Homo sapiens interleukin 9 receptor (IL9R), transcript variant 1, mRNA.; Homo sapiens interleukin 9 receptor (IL9R), transcript variant 2, mRNA.; interleukin 9 receptor [Source:HGNC Symbol;Acc:HGNC:6030]; Homo sapiens interleukin 9 receptor, mRNA (cDNA clone MGC:59852 IMAGE:6304829), complete cds.; Transcript Identified by AceView, Entrez Gene ID(s) 3581, RefSeq ID(s) NM_002186; Transcript Identified by AceView, Entrez Gene ID(s) 3581 | IL9R            | 0,82 |
| olfactory receptor family 4 subfamily E member 1 (gene/pseudogene) [Source:HGNC Symbol;Acc:HGNC:8296]                                                                                                                                                                                                                                                                                                                                                  | OR4E1           | 0,82 |
| sigma non-opioid intracellular receptor 1                                                                                                                                                                                                                                                                                                                                                                                                              | SIGMAR1         | 0,82 |
| bromodomain PHD finger transcription factor                                                                                                                                                                                                                                                                                                                                                                                                            | BPTF            | 0,82 |
| DENN/MADD domain containing 6A                                                                                                                                                                                                                                                                                                                                                                                                                         | DENND6A         | 0,82 |
| hypoxia up-regulated 1                                                                                                                                                                                                                                                                                                                                                                                                                                 | HYOU1           | 0,82 |
| mitochondrial tRNA translation optimization 1                                                                                                                                                                                                                                                                                                                                                                                                          | MTO1            | 0,82 |
| zinc finger protein 721; ATP binding cassette subfamily A member 11, pseudogene                                                                                                                                                                                                                                                                                                                                                                        | ZNF721; ABCA11P | 0,82 |
| serine peptidase inhibitor, Kazal type 2 (acrosin-trypsin inhibitor)                                                                                                                                                                                                                                                                                                                                                                                   | SPINK2          | 0,82 |
| mitochondrial ribosomal protein S9                                                                                                                                                                                                                                                                                                                                                                                                                     | MRPS9           | 0,82 |
| POU class 5 homeobox 1                                                                                                                                                                                                                                                                                                                                                                                                                                 | POU5F1          | 0,82 |
| ribosomal protein L7a                                                                                                                                                                                                                                                                                                                                                                                                                                  | RPL7A           | 0,82 |
| NLR family, CARD domain containing 5                                                                                                                                                                                                                                                                                                                                                                                                                   | NLRC5           | 0,82 |
| BUD13 homolog                                                                                                                                                                                                                                                                                                                                                                                                                                          | BUD13           | 0,82 |
| protein phosphatase 2, regulatory subunit B, beta                                                                                                                                                                                                                                                                                                                                                                                                      | PPP2R3B         | 0,82 |
| protein phosphatase 2, regulatory subunit B, beta                                                                                                                                                                                                                                                                                                                                                                                                      | PPP2R3B         | 0,82 |
| dpy-19-like 1 (C. elegans)                                                                                                                                                                                                                                                                                                                                                                                                                             | DPY19L1         | 0,82 |
| protein kinase, AMP-activated, beta 1 non-catalytic subunit                                                                                                                                                                                                                                                                                                                                                                                            | PRKAB1          | 0,82 |
| deoxyguanosine kinase                                                                                                                                                                                                                                                                                                                                                                                                                                  | DGUOK           | 0,82 |
| long intergenic non-protein coding RNA 1126                                                                                                                                                                                                                                                                                                                                                                                                            | LINC01126       | 0,82 |
| Myb/SANT-like DNA-binding domain containing 4 with coiled-coils                                                                                                                                                                                                                                                                                                                                                                                        | MSANTD4         | 0,82 |
| CCZ1 homolog B, vacuolar protein trafficking and biogenesis associated                                                                                                                                                                                                                                                                                                                                                                                 | CCZ1B           | 0,82 |
| D-tyrosyl-tRNA deacylase 2 (putative)                                                                                                                                                                                                                                                                                                                                                                                                                  | DTD2            | 0,82 |
| ADAM metallopeptidase domain 30                                                                                                                                                                                                                                                                                                                                                                                                                        | ADAM30          | 0,82 |
| Jeck2013 ALT_ACCEPTOR, ALT_DONOR, coding, INTERNAL, intronic best transcript NM_133459                                                                                                                                                                                                                                                                                                                                                                 | CCBE1           | 0,82 |
| lactate dehydrogenase D                                                                                                                                                                                                                                                                                                                                                                                                                                | LDHD            | 0,82 |
| neurotrophic tyrosine kinase, receptor, type 3                                                                                                                                                                                                                                                                                                                                                                                                         | NTRK3           | 0,82 |
| zinc finger protein 75D                                                                                                                                                                                                                                                                                                                                                                                                                                | ZNF75D          | 0,82 |
| solute carrier family 35, member G1                                                                                                                                                                                                                                                                                                                                                                                                                    | SLC35G1         | 0,82 |

|                                                                                                                                                             |                                             |      |
|-------------------------------------------------------------------------------------------------------------------------------------------------------------|---------------------------------------------|------|
| tripartite motif containing 14                                                                                                                              | TRIM14                                      | 0,82 |
| epidermal growth factor receptor pathway substrate 15-like 1                                                                                                | EPS15L1                                     | 0,82 |
| colipase-like 1                                                                                                                                             | CLPSL1                                      | 0,82 |
| integrator complex subunit 8                                                                                                                                | INTS8                                       | 0,82 |
| olfactory receptor, family 56, subfamily B, member 1                                                                                                        | OR56B1                                      | 0,82 |
| olfactory receptor, family 51, subfamily F, member 1 (gene/pseudogene)                                                                                      | OR51F1                                      | 0,82 |
| chymase 1, mast cell                                                                                                                                        | CMA1                                        | 0,82 |
| crystallin beta B2                                                                                                                                          | CRYBB2                                      | 0,82 |
| mitochondrial ribosomal protein L43                                                                                                                         | MRPL43                                      | 0,82 |
| ankyrin repeat domain 18B                                                                                                                                   | ANKRD18B                                    | 0,82 |
| peptidoglycan recognition protein 2                                                                                                                         | PGLYRP2                                     | 0,82 |
| Transcript Identified by AceView, Entrez Gene ID(s) 26010                                                                                                   | SPATS2L                                     | 0,82 |
| methylthioribose-1-phosphate isomerase 1                                                                                                                    | MRI1                                        | 0,82 |
| mitogen-activated protein kinase 1                                                                                                                          | MAPK1                                       | 0,82 |
| heparan sulfate (glucosamine) 3-O-sulfotransferase 2                                                                                                        | HS3ST2                                      | 0,82 |
| melanocortin 4 receptor                                                                                                                                     | MC4R                                        | 0,82 |
| ring finger and WD repeat domain 2, E3 ubiquitin protein ligase                                                                                             | RFWD2                                       | 0,82 |
| lymphocyte antigen 6 complex, locus E                                                                                                                       | LY6E                                        | 0,82 |
| voltage-dependent anion channel 3                                                                                                                           | VDAC3                                       | 0,82 |
| DEAH (Asp-Glu-Ala-His) box polypeptide 36                                                                                                                   | DHX36                                       | 0,82 |
| defensin, beta 127                                                                                                                                          | DEFB127                                     | 0,82 |
| 5-nucleotidase, cytosolic IIIA                                                                                                                              | NT5C3A                                      | 0,82 |
| lymphocyte antigen 86                                                                                                                                       | LY86                                        | 0,82 |
| Transcript Identified by AceView, Entrez Gene ID(s) 225                                                                                                     | ABCD2                                       | 0,82 |
| Rho GTPase activating protein 11B                                                                                                                           | ARHGAP11B                                   | 0,82 |
| glutamyl-tRNA synthetase 2, mitochondrial                                                                                                                   | EARS2                                       | 0,82 |
| NADH dehydrogenase (ubiquinone) 1 alpha subcomplex, 3, 9kDa                                                                                                 | NDUFA3                                      | 0,82 |
| argonaute RISC catalytic component 4                                                                                                                        | ago-04                                      | 0,82 |
| chemokine (C motif) ligand 1                                                                                                                                | XCL1                                        | 0,82 |
| neuroblastoma breakpoint family, member 9                                                                                                                   | NBPF9                                       | 0,82 |
| obscurin, cytoskeletal calmodulin and titin-interacting RhoGEF                                                                                              | OBSCN                                       | 0,82 |
| ribosomal protein L15                                                                                                                                       | RPL15                                       | 0,81 |
| HCLS1 associated protein X-1                                                                                                                                | HAX1                                        | 0,81 |
| SPATA31 subfamily C, member 1                                                                                                                               | SPATA31C1                                   | 0,81 |
| ribosomal protein L4; small nucleolar RNA, C/D box 16; small nucleolar RNA, C/D box 18A; small nucleolar RNA, C/D box 18B; small nucleolar RNA, C/D box 18C | RPL4; SNORD16; SNORD18A; SNORD18B; SNORD18C | 0,81 |
| odd-skipped related transcription factor 1                                                                                                                  | OSR1                                        | 0,81 |



|                                                                                                                                                                                                                                                                                                                                                                                                                                                                                                                                                                                                                                                                                                                                                                                                                                                                                                                               |              |      |
|-------------------------------------------------------------------------------------------------------------------------------------------------------------------------------------------------------------------------------------------------------------------------------------------------------------------------------------------------------------------------------------------------------------------------------------------------------------------------------------------------------------------------------------------------------------------------------------------------------------------------------------------------------------------------------------------------------------------------------------------------------------------------------------------------------------------------------------------------------------------------------------------------------------------------------|--------------|------|
| claudin 16                                                                                                                                                                                                                                                                                                                                                                                                                                                                                                                                                                                                                                                                                                                                                                                                                                                                                                                    | CLDN16       | 0,81 |
| solute carrier family 22, member 25                                                                                                                                                                                                                                                                                                                                                                                                                                                                                                                                                                                                                                                                                                                                                                                                                                                                                           | SLC22A25     | 0,81 |
| olfactory receptor, family 9, subfamily G, member 1;<br>olfactory receptor, family 9, subfamily G, member 9                                                                                                                                                                                                                                                                                                                                                                                                                                                                                                                                                                                                                                                                                                                                                                                                                   | OR9G1; OR9G9 | 0,81 |
| membrane protein, palmitoylated 5                                                                                                                                                                                                                                                                                                                                                                                                                                                                                                                                                                                                                                                                                                                                                                                                                                                                                             | MPP5         | 0,81 |
| sphingosine-1-phosphate receptor 5                                                                                                                                                                                                                                                                                                                                                                                                                                                                                                                                                                                                                                                                                                                                                                                                                                                                                            | S1PR5        | 0,81 |
| lysine (K)-specific methyltransferase 5A                                                                                                                                                                                                                                                                                                                                                                                                                                                                                                                                                                                                                                                                                                                                                                                                                                                                                      | KMT5A        | 0,81 |
| c-src tyrosine kinase                                                                                                                                                                                                                                                                                                                                                                                                                                                                                                                                                                                                                                                                                                                                                                                                                                                                                                         | CSK          | 0,81 |
| carbohydrate kinase domain containing                                                                                                                                                                                                                                                                                                                                                                                                                                                                                                                                                                                                                                                                                                                                                                                                                                                                                         | CARKD        | 0,81 |
| olfactory receptor, family 12, subfamily D, member 3                                                                                                                                                                                                                                                                                                                                                                                                                                                                                                                                                                                                                                                                                                                                                                                                                                                                          | OR12D3       | 0,81 |
| SLIT-ROBO Rho GTPase activating protein 2B                                                                                                                                                                                                                                                                                                                                                                                                                                                                                                                                                                                                                                                                                                                                                                                                                                                                                    | SRGAP2B      | 0,81 |
| ribosomal protein S15                                                                                                                                                                                                                                                                                                                                                                                                                                                                                                                                                                                                                                                                                                                                                                                                                                                                                                         | RPS15        | 0,81 |
| tumor necrosis factor receptor superfamily, member 10c,<br>decoy without an intracellular domain                                                                                                                                                                                                                                                                                                                                                                                                                                                                                                                                                                                                                                                                                                                                                                                                                              | TNFRSF10C    | 0,81 |
| solute carrier family 44 (choline transporter), member 2                                                                                                                                                                                                                                                                                                                                                                                                                                                                                                                                                                                                                                                                                                                                                                                                                                                                      | SLC44A2      | 0,81 |
| GLI family zinc finger 2                                                                                                                                                                                                                                                                                                                                                                                                                                                                                                                                                                                                                                                                                                                                                                                                                                                                                                      | GLI2         | 0,81 |
| meprin A, alpha (PABA peptide hydrolase)                                                                                                                                                                                                                                                                                                                                                                                                                                                                                                                                                                                                                                                                                                                                                                                                                                                                                      | MEP1A        | 0,81 |
| F-box and WD repeat domain containing 2                                                                                                                                                                                                                                                                                                                                                                                                                                                                                                                                                                                                                                                                                                                                                                                                                                                                                       | FBXW2        | 0,81 |
| thyrotropin-releasing hormone                                                                                                                                                                                                                                                                                                                                                                                                                                                                                                                                                                                                                                                                                                                                                                                                                                                                                                 | TRH          | 0,81 |
| ribosomal protein S15a                                                                                                                                                                                                                                                                                                                                                                                                                                                                                                                                                                                                                                                                                                                                                                                                                                                                                                        | RPS15A       | 0,81 |
| PAP associated domain containing 5                                                                                                                                                                                                                                                                                                                                                                                                                                                                                                                                                                                                                                                                                                                                                                                                                                                                                            | PAPD5        | 0,81 |
| acyl-CoA oxidase 3, pristanoyl                                                                                                                                                                                                                                                                                                                                                                                                                                                                                                                                                                                                                                                                                                                                                                                                                                                                                                | ACOX3        | 0,81 |
| Homo sapiens CD99 molecule (CD99), transcript variant 2,<br>mRNA.; Homo sapiens CD99 molecule (CD99), transcript<br>variant 3, mRNA.; Homo sapiens CD99 molecule (CD99),<br>transcript variant 1, mRNA.; CD99 molecule<br>[Source:HGNC Symbol;Acc:HGNC:7082]; Homo sapiens<br>CD99 molecule, mRNA (cDNA clone MGC:2282<br>IMAGE:3161673), complete cds.; Homo sapiens CD99<br>molecule, mRNA (cDNA clone MGC:3938<br>IMAGE:2906143), complete cds.; Homo sapiens CD99<br>molecule, mRNA (cDNA clone MGC:19734<br>IMAGE:3606974), complete cds.; Homo sapiens CD99<br>molecule, mRNA (cDNA clone MGC:4214<br>IMAGE:2957883), complete cds.; Homo sapiens CD99<br>molecule, mRNA (cDNA clone MGC:14521<br>IMAGE:4094268), complete cds.; Salzman2013<br>ANNOTATED, CDS, coding, INTERNAL, OVCODE, OVEXON<br>best transcript NM_002414; Salzman2013 ANNOTATED,<br>CDS, coding, OVCODE, OVEXON, UTR3 best transcript<br>NM_002414 | CD99         | 0,81 |
| RecQ mediated genome instability 2                                                                                                                                                                                                                                                                                                                                                                                                                                                                                                                                                                                                                                                                                                                                                                                                                                                                                            | RMI2         | 0,81 |
| Zhang2013 ALT_ACCEPTOR, ALT_DONOR, coding,<br>INTERNAL, intronic best transcript NM_198253                                                                                                                                                                                                                                                                                                                                                                                                                                                                                                                                                                                                                                                                                                                                                                                                                                    | TERT         | 0,81 |
| sperm associated antigen 7                                                                                                                                                                                                                                                                                                                                                                                                                                                                                                                                                                                                                                                                                                                                                                                                                                                                                                    | SPAG7        | 0,81 |

|                                                                   |               |      |
|-------------------------------------------------------------------|---------------|------|
| tenascin R                                                        | TNR           | 0,81 |
| NODAL modulator 3; NODAL modulator 2                              | NOMO3; NOMO2  | 0,81 |
| zinc finger protein 91                                            | ZNF91         | 0,81 |
| splicing factor proline/glutamine-rich                            | SFPQ          | 0,81 |
| HtrA serine peptidase 1                                           | HTRA1         | 0,81 |
| Transcript Identified by AceView, Entrez Gene ID(s) 1803          | DPP4          | 0,81 |
| zinc finger protein 768                                           | ZNF768        | 0,81 |
| CD2 molecule                                                      | CD2           | 0,81 |
| coiled-coil domain containing 146                                 | CCDC146       | 0,81 |
| crooked neck pre-mRNA splicing factor 1                           | CRNKL1        | 0,81 |
| transmembrane 4 L six family member 18                            | TM4SF18       | 0,81 |
| v-maf avian musculoaponeurotic fibrosarcoma oncogene homolog      | MAF           | 0,81 |
| nicotinamide nucleotide adenylyltransferase 2                     | NMNAT2        | 0,81 |
| thyroid stimulating hormone receptor                              | TSHR          | 0,81 |
| ubiquinol-cytochrome c reductase complex assembly factor 3        | UQCC3         | 0,81 |
| peptidase domain containing associated with muscle regeneration 1 | PAMR1         | 0,81 |
| polyhomeotic homolog 2 (Drosophila); microRNA 3605                | PHC2; MIR3605 | 0,81 |
| Transcript Identified by AceView, Entrez Gene ID(s) 22985         | ACIN1         | 0,81 |
| complement factor H-related 1                                     | CFHR1         | 0,81 |
| neurotrophin 3                                                    | NTF3          | 0,81 |
| actin, gamma 2, smooth muscle, enteric                            | ACTG2         | 0,81 |
| RNA binding motif protein 11                                      | RBM11         | 0,81 |
| olfactory receptor, family 6, subfamily B, member 1               | OR6B1         | 0,81 |
| UBX domain protein 4                                              | UBXN4         | 0,81 |
| chemokine (C-X-C motif) ligand 6                                  | CXCL6         | 0,81 |
| PSMA3 antisense RNA 1                                             | PSMA3-AS1     | 0,81 |
| oviductal glycoprotein 1                                          | OVGP1         | 0,81 |
| Transcript Identified by AceView, Entrez Gene ID(s) 285074; 5343  | PLGLB1        | 0,81 |
| clustered mitochondria (cluA/CLU1) homolog                        | CLUH          | 0,81 |
| DEXH (Asp-Glu-X-His) box polypeptide 58                           | DHX58         | 0,81 |
| endosulfine alpha                                                 | ENSA          | 0,81 |
| family with sequence similarity 110, member A                     | FAM110A       | 0,81 |
| olfactory receptor, family 8, subfamily K, member 1               | OR8K1         | 0,81 |
| adaptor-related protein complex 4, epsilon 1 subunit              | AP4E1         | 0,81 |
| serine/arginine repetitive matrix 1                               | SRRM1         | 0,81 |
| presenilin associated, rhomboid-like                              | PARL          | 0,81 |
| keratin associated protein 4-9                                    | KRTAP4-9      | 0,81 |
| olfactory receptor, family 5, subfamily P, member 3               | OR5P3         | 0,81 |
| cyclic nucleotide gated channel alpha 2                           | CNGA2         | 0,81 |

|                                                                                                       |                         |      |
|-------------------------------------------------------------------------------------------------------|-------------------------|------|
| ribosomal protein S6 kinase, 70kDa, polypeptide 1                                                     | RPS6KB1                 | 0,81 |
| proteasome activator subunit 3                                                                        | PSME3                   | 0,81 |
| solute carrier family 36 (proton/amino acid symporter), member 2                                      | SLC36A2                 | 0,81 |
| F-box protein 43                                                                                      | FBXO43                  | 0,81 |
| mitochondrial ribosomal protein S24                                                                   | MRPS24                  | 0,81 |
| Jeck2013 ANTISENSE, INTERNAL, intronic, ncRNA, OVEXON best transcript NR_036569                       | PILRB                   | 0,81 |
| peroxisomal biogenesis factor 3                                                                       | PEX3                    | 0,81 |
| 5-nucleotidase domain containing 1                                                                    | NT5DC1                  | 0,81 |
| inositol polyphosphate-5-phosphatase D                                                                | INPP5D                  | 0,81 |
| sorting nexin 31                                                                                      | SNX31                   | 0,81 |
| protein phosphatase 2, regulatory subunit B, alpha                                                    | PPP2R5A                 | 0,81 |
| MLX interacting protein                                                                               | MLXIP                   | 0,81 |
| heat shock 27kDa protein 3                                                                            | HSPB3                   | 0,81 |
| spermatogenesis associated 9                                                                          | SPATA9                  | 0,81 |
| crystallin gamma C                                                                                    | CRYGC                   | 0,81 |
| zinc finger protein 541                                                                               | ZNF541                  | 0,81 |
| signal peptide peptidase like 2A                                                                      | SPPL2A                  | 0,81 |
| uncharacterized LOC651430; uncharacterized LOC651430 [Source:EntrezGene;Acc:651430]; novel transcript | FLJ38576; RP11-173M11.6 | 0,81 |
| Memczak2013 ANTISENSE, coding, INTERNAL, intronic best transcript NM_014117                           | C16orf72                | 0,81 |
| aquarius intron-binding spliceosomal factor                                                           | AQR                     | 0,81 |
| Jeck2013 ALT_ACCEPTOR, ALT_DONOR, coding, INTERNAL, intronic best transcript NM_004249                | RAB28                   | 0,81 |
| cytochrome P450, family 11, subfamily B, polypeptide 2                                                | CYP11B2                 | 0,81 |
| ST8 alpha-N-acetyl-neuraminide alpha-2,8-sialyltransferase 1                                          | ST8SIA1                 | 0,81 |
| forkhead box P2                                                                                       | FOXP2                   | 0,81 |
| cytochrome P450, family 2, subfamily J, polypeptide 2                                                 | CYP2J2                  | 0,81 |
| oocyte expressed protein                                                                              | OOEP                    | 0,81 |
| chromosome 12 open reading frame 74                                                                   | C12orf74                | 0,81 |
| POU class 3 homeobox 4                                                                                | POU3F4                  | 0,81 |
| ribosomal RNA processing 7 homolog A                                                                  | RRP7A                   | 0,81 |
| potassium channel subfamily M regulatory beta subunit 1                                               | KCNMB1                  | 0,81 |
| thioredoxin-related transmembrane protein 4                                                           | TMX4                    | 0,81 |
| Usher syndrome 1C binding protein 1                                                                   | USHBP1                  | 0,81 |
| ribosomal protein L7                                                                                  | RPL7                    | 0,81 |
| guanine nucleotide binding protein (G protein), gamma 2                                               | GNG2                    | 0,81 |
| dihydrofolate reductase                                                                               | DHFR                    | 0,81 |
| forkhead box J1                                                                                       | FOXJ1                   | 0,81 |

|                                                                                                                                                         |               |      |
|---------------------------------------------------------------------------------------------------------------------------------------------------------|---------------|------|
| leucine aminopeptidase 3                                                                                                                                | LAP3          | 0,81 |
| dendrocyte expressed seven transmembrane protein                                                                                                        | DCSTAMP       | 0,81 |
| resistin like beta                                                                                                                                      | RETNLB        | 0,81 |
| pelota homolog (Drosophila); integrin alpha 1                                                                                                           | PELO; ITGA1   | 0,81 |
| echinoderm microtubule associated protein like 5                                                                                                        | EML5          | 0,81 |
| Memczak2013 ANTISENSE, coding, INTERNAL, UTR3 best transcript NM_032434                                                                                 | ZNF512        | 0,81 |
| ribosomal protein L22                                                                                                                                   | RPL22         | 0,81 |
| C-type lectin domain family 18, member A                                                                                                                | CLEC18A       | 0,81 |
| GTPase activating protein and VPS9 domains 1                                                                                                            | GAPVD1        | 0,81 |
| solute carrier family 12 (potassium/chloride transporter), member 4                                                                                     | SLC12A4       | 0,81 |
| POU class 2 homeobox 1                                                                                                                                  | POU2F1        | 0,81 |
| Transcript Identified by AceView, Entrez Gene ID(s) 23175                                                                                               | LPIN1         | 0,81 |
| small ubiquitin-like modifier 2                                                                                                                         | SUMO2         | 0,81 |
| family with sequence similarity 216, member A                                                                                                           | FAM216A       | 0,81 |
| uroporphyrinogen III synthase                                                                                                                           | UROS          | 0,81 |
| cornichon family AMPA receptor auxiliary protein 4                                                                                                      | CNIH4         | 0,81 |
| POP5 homolog, ribonuclease P/MRP subunit                                                                                                                | POP5          | 0,81 |
| unc-5 netrin receptor B                                                                                                                                 | UNC5B         | 0,81 |
| NADH dehydrogenase (ubiquinone) Fe-S protein 1, 75kDa (NADH-coenzyme Q reductase); glycine cleavage system protein H (aminomethyl carrier) pseudogene 3 | NDUFS1; GCSP3 | 0,81 |
| mediator complex subunit 20                                                                                                                             | MED20         | 0,81 |
| hypoxia up-regulated 1                                                                                                                                  | HYOU1         | 0,81 |
| zinc finger protein 720                                                                                                                                 | ZNF720        | 0,81 |
| REX4 homolog, 3'-5' exonuclease [Source:HGNC Symbol;Acc:HGNC:12820]                                                                                     | REXO4         | 0,81 |
| chromosome 7 open reading frame 65                                                                                                                      | C7orf65       | 0,81 |
| defensin, beta 105A                                                                                                                                     | DEFB105A      | 0,81 |
| inositol polyphosphate-5-phosphatase D                                                                                                                  | INPP5D        | 0,81 |
| Meis homeobox 1                                                                                                                                         | MEIS1         | 0,81 |
| family with sequence similarity 9, member A                                                                                                             | FAM9A         | 0,81 |
| protease, serine 50                                                                                                                                     | PRSS50        | 0,81 |
| regulatory factor X, 2 (influences HLA class II expression)                                                                                             | RFX2          | 0,81 |
| polymerase (RNA) II (DNA directed) polypeptide J4, pseudogene                                                                                           | POLR2J4       | 0,81 |
| BRCA1-associated ATM activator 1                                                                                                                        | BRAT1         | 0,81 |
| dolichyl-phosphate mannosyltransferase polypeptide 1, catalytic subunit                                                                                 | DPM1          | 0,81 |
| roundabout guidance receptor 1                                                                                                                          | ROBO1         | 0,81 |
| Jeck2013 ALT_ACCEPTOR, ALT_DONOR, coding, INTERNAL, intronic best transcript NM_017774                                                                  | CDKAL1        | 0,81 |

|                                                                        |               |      |
|------------------------------------------------------------------------|---------------|------|
| plastin 1                                                              | PLS1          | 0,81 |
| interleukin 1 receptor associated kinase 1; microRNA 718               | IRAK1; MIR718 | 0,81 |
| MTOR associated protein, LST8 homolog                                  | MLST8         | 0,81 |
| SH2 domain containing 3C                                               | SH2D3C        | 0,81 |
| POU class 4 homeobox 2                                                 | POU4F2        | 0,81 |
| chromosome 4 open reading frame 50                                     | C4orf50       | 0,81 |
| Bardet-Biedl syndrome 9                                                | BBS9          | 0,81 |
| zinc finger protein 470                                                | ZNF470        | 0,81 |
| kallikrein related peptidase 3                                         | KLK3          | 0,81 |
| dishevelled segment polarity protein 3                                 | DVL3          | 0,81 |
| Memczak2013 ANTISENSE, CDS, coding, INTERNAL best transcript NM_014931 | PPP6R1        | 0,81 |
| NYN domain and retroviral integrase containing                         | NYNRIN        | 0,81 |
| ermin                                                                  | ERMN          | 0,81 |
| RAN, member RAS oncogene family                                        | RAN           | 0,81 |
| cytochrome b561 family, member D2                                      | CYB561D2      | 0,81 |
| heterogeneous nuclear ribonucleoprotein D                              | HNRNPD        | 0,81 |
| proline rich Gla (G-carboxyglutamic acid) 3 (transmembrane)            | PRRG3         | 0,81 |
| tafazzin                                                               | TAZ           | 0,81 |
| family with sequence similarity 216, member B                          | FAM216B       | 0,81 |
| leucine rich repeat containing 45                                      | LRRC45        | 0,81 |
| carbonic anhydrase XIII                                                | CA13          | 0,81 |
| ATP/GTP binding protein-like 1                                         | AGBL1         | 0,81 |
| collagen, type VI, alpha 2                                             | COL6A2        | 0,81 |
| ectonucleotide pyrophosphatase/phosphodiesterase 5 (putative)          | ENPP5         | 0,81 |
| Transcript Identified by AceView, Entrez Gene ID(s) 3775               | KCNK1         | 0,81 |
| methyl-CpG binding domain protein 6                                    | MBD6          | 0,81 |
| olfactory receptor, family 8, subfamily K, member 5                    | OR8K5         | 0,81 |
| NADPH oxidase activator 1                                              | NOXA1         | 0,81 |
| dihydropyrimidinase-like 5                                             | DPYSL5        | 0,81 |
| chromosome 16 open reading frame 59                                    | C16orf59      | 0,81 |
| glyoxalase I                                                           | GLO1          | 0,81 |
| chromosome 15 open reading frame 43                                    | C15orf43      | 0,81 |
| secretogranin III                                                      | SCG3          | 0,81 |
| hyaluronan binding protein 4                                           | HABP4         | 0,81 |
| transcription elongation factor B polypeptide 3B (elongin A2)          | TCEB3B        | 0,81 |
| Memczak2013 ANTISENSE, CDS, coding, INTERNAL best transcript NM_025268 | TMEM121       | 0,81 |
| maestro heat-like repeat family member 6                               | MROH6         | 0,81 |
| ribosomal protein S25                                                  | RPS25         | 0,81 |

|                                                                                            |                                      |      |
|--------------------------------------------------------------------------------------------|--------------------------------------|------|
| Transcript Identified by AceView, Entrez Gene ID(s) 1768                                   | DNAH6                                | 0,81 |
| small nucleolar RNA, C/D box 49A; small nucleolar RNA, C/D box 65; LRRC75A antisense RNA 1 | SNORD49A;<br>SNORD65;<br>LRRC75A-AS1 | 0,81 |
| chromosome 14 open reading frame 169                                                       | C14orf169                            | 0,81 |
| transmembrane BAX inhibitor motif containing 4                                             | TMBIM4                               | 0,81 |
| WD repeat and SOCS box containing 1                                                        | WSB1                                 | 0,81 |
| ring finger protein 41, E3 ubiquitin protein ligase                                        | RNF41                                | 0,81 |
| forkhead box N2                                                                            | FOXN2                                | 0,81 |
| double homeobox 5                                                                          | DUX5                                 | 0,81 |
| ATPase, H <sup>+</sup> transporting, lysosomal 70kDa, V1 subunit A                         | ATP6V1A                              | 0,81 |
| zinc finger, RAN-binding domain containing 2                                               | ZRANB2                               | 0,81 |
| potassium channel tetramerization domain containing 2                                      | KCTD2                                | 0,81 |
| NK6 homeobox 1                                                                             | NKX6-1                               | 0,81 |
| tubulin tyrosine ligase-like family member 2                                               | TTLL2                                | 0,81 |
| complement component 5a receptor 1                                                         | C5AR1                                | 0,81 |
| UDP-Gal:betaGlcNAc beta 1,4- galactosyltransferase, polypeptide 3                          | B4GALT3                              | 0,81 |
| ubiquitin specific peptidase 28                                                            | USP28                                | 0,81 |
| family with sequence similarity 153, member A                                              | FAM153A                              | 0,81 |
| retrotransposon gag domain containing 1                                                    | RGAG1                                | 0,81 |
| GDP-mannose pyrophosphorylase B                                                            | GMPPB                                | 0,81 |
| heterogeneous nuclear ribonucleoprotein C-like 4                                           | HNRNPCL4                             | 0,81 |
| hydroxymethylbilane synthase                                                               | HMBS                                 | 0,81 |
| USO1 vesicle transport factor                                                              | USO1                                 | 0,81 |
| coenzyme Q5, methyltransferase                                                             | COQ5                                 | 0,81 |
| leucine rich repeat containing 30                                                          | LRRC30                               | 0,81 |
| CUB and zona pellucida-like domains 1                                                      | CUZD1                                | 0,81 |
| Memczak2013 ALT_ACCEPTOR, ALT_DONOR, coding, INTERNAL, intronic best transcript NM_020896  | OSBPL5                               | 0,81 |
| integrin alpha 11                                                                          | ITGA11                               | 0,81 |
| ribosomal protein S24                                                                      | RPS24                                | 0,81 |
| cilia and flagella associated protein 74                                                   | CFAP74                               | 0,81 |
| far upstream element (FUSE) binding protein 1                                              | FUBP1                                | 0,81 |
| diacylglycerol kinase, delta 130kDa                                                        | DGKD                                 | 0,81 |
| family with sequence similarity 133, member A pseudogene                                   | LOC100421561                         | 0,81 |
| melanocortin 2 receptor (adrenocorticotrophic hormone)                                     | MC2R                                 | 0,81 |
| proteasome (prosome, macropain) assembly chaperone 4                                       | PSMG4                                | 0,81 |
| zinc finger protein 75a                                                                    | ZNF75A                               | 0,81 |
| gremlin 1, DAN family BMP antagonist [Source:HGNC Symbol;Acc:HGNC:2001]                    | GREM1                                | 0,81 |

|                                                                          |          |      |
|--------------------------------------------------------------------------|----------|------|
| hyperpolarization activated cyclic nucleotide gated potassium channel 2  | HCN2     | 0,81 |
| DnaJ (Hsp40) homolog, subfamily C, member 21                             | DNAJC21  | 0,81 |
| AT rich interactive domain 1A (SWI-like)                                 | ARID1A   | 0,81 |
| coiled-coil-helix-coiled-coil-helix domain containing 4                  | CHCHD4   | 0,81 |
| chromosome 11 open reading frame 87                                      | C11orf87 | 0,81 |
| calcium channel, voltage-dependent, T type, alpha 1G subunit             | CACNA1G  | 0,81 |
| solute carrier family 25 (glutamate carrier), member 18                  | SLC25A18 | 0,81 |
| lipase, hormone-sensitive                                                | LIPE     | 0,80 |
| corticotropin releasing hormone                                          | CRH      | 0,80 |
| Transcript Identified by AceView, Entrez Gene ID(s) 153339               | TMEM167A | 0,80 |
| TPX2, microtubule-associated                                             | TPX2     | 0,80 |
| chromosome 19 open reading frame 24                                      | C19orf24 | 0,80 |
| SH3-domain GRB2-like 3                                                   | SH3GL3   | 0,80 |
| Jeck2013 ALT_DONOR, coding, INTERNAL, intronic best transcript NM_006845 | KIF2C    | 0,80 |
| centromere protein I                                                     | CENPI    | 0,80 |
| G protein-coupled receptor kinase 5                                      | GRK5     | 0,80 |
| leucine rich repeat containing 59                                        | LRRC59   | 0,80 |
| autophagy related 5                                                      | ATG5     | 0,80 |
| chromosome 2 open reading frame 47                                       | C2orf47  | 0,80 |
| KIAA1024                                                                 | KIAA1024 | 0,80 |
| mitochondrial ribosomal protein L54                                      | MRPL54   | 0,80 |
| testis development related protein                                       | TDRP     | 0,80 |
| WDFY family member 4                                                     | WDFY4    | 0,80 |
| COP9 signalosome subunit 2                                               | COPS2    | 0,80 |
| ribosomal protein L11                                                    | RPL11    | 0,80 |
| transcription factor 24                                                  | TCF24    | 0,80 |
| major histocompatibility complex, class II, DP alpha 1                   | HLA-DPA1 | 0,80 |
| centrosomal protein 192kDa                                               | CEP192   | 0,80 |
| cysteine rich hydrophobic domain 1                                       | CHIC1    | 0,80 |
| methylenetetrahydrofolate dehydrogenase (NADP+ dependent) 2-like         | MTHFD2L  | 0,80 |
| coiled-coil domain containing 190                                        | CCDC190  | 0,80 |
| protocadherin 10                                                         | PCDH10   | 0,80 |
| splicing factor 3b subunit 2                                             | SF3B2    | 0,80 |
| N-deacetylase/N-sulfotransferase (heparan glucosaminy) 4                 | NDST4    | 0,80 |
| RUN and FYVE domain containing 3                                         | RUFY3    | 0,80 |
| Transcript Identified by AceView, Entrez Gene ID(s) 2890                 | GRIA1    | 0,80 |
| chromosome 4 open reading frame 26                                       | C4orf26  | 0,80 |

|                                                                                                                                   |                                              |      |
|-----------------------------------------------------------------------------------------------------------------------------------|----------------------------------------------|------|
| Transcript Identified by AceView, Entrez Gene ID(s) 5747                                                                          | PTK2                                         | 0,80 |
| phosphorylase kinase, beta                                                                                                        | PHKB                                         | 0,80 |
| slit guidance ligand 2                                                                                                            | SLIT2                                        | 0,80 |
| olfactory receptor, family 2, subfamily AP, member 1                                                                              | OR2AP1                                       | 0,80 |
| zinc finger protein 35                                                                                                            | ZNF35                                        | 0,80 |
| GDNF family receptor alpha 3                                                                                                      | GFRA3                                        | 0,80 |
| dishevelled-binding antagonist of beta-catenin 1                                                                                  | DACT1                                        | 0,80 |
| serine/arginine-rich splicing factor 10                                                                                           | SRSF10                                       | 0,80 |
| protein phosphatase 1, regulatory subunit 26                                                                                      | PPP1R26                                      | 0,80 |
| ribosomal protein L17; small nucleolar RNA, C/D box 58A;<br>small nucleolar RNA, C/D box 58B; small nucleolar RNA,<br>C/D box 58C | RPL17;<br>SNORD58A;<br>SNORD58B;<br>SNORD58C | 0,80 |
| CCAAT/enhancer binding protein (C/EBP), delta                                                                                     | CEBPD                                        | 0,80 |
| l(3)mbt-like 4 (Drosophila)                                                                                                       | L3MBTL4                                      | 0,80 |
| isoprenylcysteine carboxyl methyltransferase                                                                                      | ICMT                                         | 0,80 |
| keratin associated protein 5-7                                                                                                    | KRTAP5-7                                     | 0,80 |
| boule homolog, RNA binding protein                                                                                                | BOLL                                         | 0,80 |
| Transcript Identified by AceView, Entrez Gene ID(s) 90338                                                                         | ZNF160                                       | 0,80 |
| flavin containing monooxygenase 4                                                                                                 | FMO4                                         | 0,80 |
| Rh-associated glycoprotein                                                                                                        | RHAG                                         | 0,80 |
| docking protein 7                                                                                                                 | DOK7                                         | 0,80 |
| PARK2 co-regulated                                                                                                                | PACRG                                        | 0,80 |
| SWI/SNF related, matrix associated, actin dependent<br>regulator of chromatin, subfamily c, member 1                              | SMARCC1                                      | 0,80 |
| deleted in lymphocytic leukemia 2 (non-protein coding);<br>microRNA 15a; microRNA 16-1; microRNA 3613                             | DLEU2; MIR15A;<br>MIR16-1;<br>MIR3613        | 0,80 |
| synaptosome associated protein 25kDa                                                                                              | SNAP25                                       | 0,80 |
| odd-skipped related transcription factor 2                                                                                        | OSR2                                         | 0,80 |
| C-x(9)-C motif containing 1                                                                                                       | CMC1                                         | 0,80 |
| prostaglandin D2 synthase 21kDa (brain)                                                                                           | PTGDS                                        | 0,80 |
| MNAT CDK-activating kinase assembly factor 1                                                                                      | MNAT1                                        | 0,80 |
| late endosomal/lysosomal adaptor, MAPK and MTOR<br>activator 2                                                                    | LAMTOR2                                      | 0,80 |
| junctional sarcoplasmic reticulum protein 1                                                                                       | JSRP1                                        | 0,80 |
| chromosome 12 open reading frame 42                                                                                               | C12orf42                                     | 0,80 |
| tachykinin receptor 1                                                                                                             | TACR1                                        | 0,80 |
| leucine rich repeat protein 1; ras homolog family member<br>Q pseudogene 1                                                        | LRR1; RHOQP1                                 | 0,80 |
| SVOP-like                                                                                                                         | SVOPL                                        | 0,80 |
| Memczak2013 ANTISENSE, CDS, coding, INTERNAL,<br>intronic best transcript NM_178860                                               | SEZ6                                         | 0,80 |



|                                                                                           |                |      |
|-------------------------------------------------------------------------------------------|----------------|------|
| carnosine dipeptidase 1 (metallopeptidase M20 family)                                     | CNDP1          | 0,80 |
| zinc finger with KRAB and SCAN domains 7                                                  | ZKSCAN7        | 0,80 |
| zinc finger protein 780B                                                                  | ZNF780B        | 0,80 |
| phospholipase C, beta 3 (phosphatidylinositol-specific)                                   | PLCB3          | 0,80 |
| relaxin/insulin-like family peptide receptor 4                                            | RXFP4          | 0,80 |
| regenerating islet-derived 1 alpha                                                        | REG1A          | 0,80 |
| proteoglycan 3                                                                            | PRG3           | 0,80 |
| 5-nucleotidase, cytosolic IIIB                                                            | NT5C3B         | 0,80 |
| fibronectin type III domain containing 9                                                  | FNDC9          | 0,80 |
| transmembrane phosphatase with tensin homology                                            | TPTE           | 0,80 |
| sorting nexin 10                                                                          | SNX10          | 0,80 |
| phospholipase C-like 1                                                                    | PLCL1          | 0,80 |
| NADH dehydrogenase (ubiquinone) 1 alpha subcomplex, 6, 14kDa                              | NDUFA6         | 0,80 |
| kinesin family member 2B                                                                  | KIF2B          | 0,80 |
| receptor-interacting serine-threonine kinase 3                                            | RIPK3          | 0,80 |
| SEC23 interacting protein                                                                 | SEC23IP        | 0,80 |
| vasohibin 1                                                                               | VASH1          | 0,80 |
| hypoxia inducible lipid droplet-associated                                                | HILPDA         | 0,80 |
| Transcript Identified by AceView, Entrez Gene ID(s) 1767                                  | DNAH5          | 0,80 |
| Transcript Identified by AceView, Entrez Gene ID(s) 55040                                 | EPN3           | 0,80 |
| major facilitator superfamily domain containing 13A                                       | MFSD13A        | 0,80 |
| Salzman2013 ANNOTATED, coding, OVEXON, UTR5 best transcript NM_001005862                  | ERBB2          | 0,80 |
| neurofibromin 2 (merlin)                                                                  | NF2            | 0,80 |
| dynein, axonemal, heavy chain 14                                                          | DNAH14         | 0,80 |
| wingless-type MMTV integration site family, member 8A                                     | WNT8A          | 0,80 |
| wingless-type MMTV integration site family, member 3A                                     | WNT3A          | 0,80 |
| cell division cycle and apoptosis regulator 1; small nucleolar RNA, C/D box 98            | CCAR1; SNORD98 | 0,80 |
| transmembrane protein 229B                                                                | TMEM229B       | 0,80 |
| chondroitin sulfate synthase 1                                                            | CHSY1          | 0,80 |
| lipoma HMGIC fusion partner-like 3                                                        | LHFPL3         | 0,80 |
| tumor necrosis factor receptor superfamily, member 13B                                    | TNFRSF13B      | 0,80 |
| olfactory receptor, family 51, subfamily M, member 1                                      | OR51M1         | 0,80 |
| cyclin-dependent kinase 10                                                                | CDK10          | 0,80 |
| Memczak2013 ALT_ACCEPTOR, ALT_DONOR, coding, INTERNAL, intronic best transcript NM_020820 | PREX1          | 0,80 |
| F-box protein 46                                                                          | FBXO46         | 0,80 |
| arginyl aminopeptidase (aminopeptidase B)-like 1                                          | RNPEPL1        | 0,80 |

|                                                                                                                                                                                                                                                                           |                                       |      |
|---------------------------------------------------------------------------------------------------------------------------------------------------------------------------------------------------------------------------------------------------------------------------|---------------------------------------|------|
| transcription elongation regulator 1-like                                                                                                                                                                                                                                 | TCERG1L                               | 0,80 |
| immunity-related GTPase family, cinema                                                                                                                                                                                                                                    | IRGC                                  | 0,80 |
| protease, serine 53                                                                                                                                                                                                                                                       | PRSS53                                | 0,80 |
| heterogeneous nuclear ribonucleoprotein K; microRNA 7-1                                                                                                                                                                                                                   | HNRNPK; MIR7-1                        | 0,80 |
| dual specificity phosphatase 15                                                                                                                                                                                                                                           | DUSP15                                | 0,80 |
| olfactory receptor, family 10, subfamily W, member 1                                                                                                                                                                                                                      | OR10W1                                | 0,80 |
| testis, prostate and placenta expressed                                                                                                                                                                                                                                   | TEPP                                  | 0,80 |
| SET domain containing 9                                                                                                                                                                                                                                                   | SETD9                                 | 0,80 |
| zinc finger, DBF-type containing 2                                                                                                                                                                                                                                        | ZDBF2                                 | 0,80 |
| potassium channel, voltage gated shaker related subfamily A, member 10                                                                                                                                                                                                    | KCNA10                                | 0,80 |
| IMP (inosine 5-monophosphate) dehydrogenase 2                                                                                                                                                                                                                             | IMPDH2                                | 0,80 |
| olfactory receptor, family 10, subfamily G, member 9                                                                                                                                                                                                                      | OR10G9                                | 0,80 |
| transmembrane protein 191B                                                                                                                                                                                                                                                | TMEM191B                              | 0,80 |
| olfactory receptor, family 4, subfamily B, member 1                                                                                                                                                                                                                       | OR4B1                                 | 0,80 |
| cholinergic receptor, nicotinic alpha 2                                                                                                                                                                                                                                   | CHRNA2                                | 0,80 |
| Homo sapiens uncharacterized LOC102724238 (LOC102724238), long non-coding RNA.; Homo sapiens uncharacterized LOC554249 (LOC554249), long non-coding RNA.; Homo sapiens hypothetical LOC554249, mRNA (cDNA clone MGC:99799 IMAGE:6378300), complete cds.; novel transcript | LOC102724238; LOC554249; RP11-111F5.4 | 0,80 |
| gelsolin                                                                                                                                                                                                                                                                  | GSN                                   | 0,80 |
| 1-aminocyclopropane-1-carboxylate synthase homolog (inactive)                                                                                                                                                                                                             | ACCS                                  | 0,80 |
| eukaryotic translation elongation factor 1 alpha 1 pseudogene 5                                                                                                                                                                                                           | EEF1A1P5                              | 0,80 |
| zinc finger protein 655                                                                                                                                                                                                                                                   | ZNF655                                | 0,80 |
| glutathione S-transferase theta 2 (gene/pseudogene); glutathione S-transferase theta 2B (gene/pseudogene)                                                                                                                                                                 | GSTT2; GSTT2B                         | 0,80 |
| runt-related transcription factor 1; translocated to, 1 (cyclin D-related)                                                                                                                                                                                                | RUNX1T1                               | 0,80 |
| GABA(A) receptor-associated protein like 2                                                                                                                                                                                                                                | GABARAPL2                             | 0,80 |
| olfactory receptor, family 6, subfamily C, member 74                                                                                                                                                                                                                      | OR6C74                                | 0,80 |
| Thy-1 cell surface antigen                                                                                                                                                                                                                                                | THY1                                  | 0,80 |
| long intergenic non-protein coding RNA 663                                                                                                                                                                                                                                | LINC00663                             | 0,80 |
| MAM domain containing 4                                                                                                                                                                                                                                                   | MAMDC4                                | 0,80 |
| cyclin I family, member 2                                                                                                                                                                                                                                                 | CCNI2                                 | 0,80 |
| prostaglandin E synthase 2                                                                                                                                                                                                                                                | PTGES2                                | 0,80 |
| cytochrome c oxidase subunit VIIc; microRNA 3607                                                                                                                                                                                                                          | COX7C; MIR3607                        | 0,80 |
| paraneoplastic Ma antigen 2                                                                                                                                                                                                                                               | PNMA2                                 | 0,80 |
| Sec61 translocon gamma subunit                                                                                                                                                                                                                                            | SEC61G                                | 0,80 |
| solute carrier family 16, member 13                                                                                                                                                                                                                                       | SLC16A13                              | 0,80 |
| YY1 associated factor 2                                                                                                                                                                                                                                                   | YAF2                                  | 0,80 |

|                                                                                                                   |            |      |
|-------------------------------------------------------------------------------------------------------------------|------------|------|
| YEATS domain containing 2                                                                                         | YEATS2     | 0,80 |
| cytochrome P450, family 11, subfamily B, polypeptide 1                                                            | CYP11B1    | 0,80 |
| dishevelled segment polarity protein 2                                                                            | DVL2       | 0,80 |
| ring finger protein 139                                                                                           | RNF139     | 0,80 |
| prodynorphin                                                                                                      | PDYN       | 0,80 |
| protein tyrosine phosphatase, receptor type, U                                                                    | PTPRU      | 0,80 |
| ubiquitin-conjugating enzyme E2S                                                                                  | UBE2S      | 0,80 |
| caspase recruitment domain family, member 18                                                                      | CARD18     | 0,80 |
| phosphoglucomutase 5                                                                                              | PGM5       | 0,80 |
| armadillo repeat containing, X-linked 4                                                                           | ARMCX4     | 0,80 |
| NADH dehydrogenase (ubiquinone) Fe-S protein 3, 30kDa<br>(NADH-coenzyme Q reductase)                              | NDUFS3     | 0,80 |
| fibroblast growth factor 11                                                                                       | FGF11      | 0,80 |
| translocase of outer mitochondrial membrane 40<br>homolog (yeast)                                                 | TOMM40     | 0,80 |
| tumor necrosis factor, alpha-induced protein 3                                                                    | TNFAIP3    | 0,80 |
| carboxypeptidase Z; G protein-coupled receptor 78                                                                 | CPZ; GPR78 | 0,80 |
| ubiquinol-cytochrome c reductase, complex III subunit X                                                           | UQCR10     | 0,80 |
| protein tyrosine phosphatase, non-receptor type 2                                                                 | PTPN2      | 0,80 |
| KH domain containing, RNA binding, signal transduction<br>associated 3                                            | KHDRBS3    | 0,80 |
| CUGBP, Elav-like family member 2                                                                                  | CELF2      | 0,80 |
| zinc finger, BED-type containing 5                                                                                | ZBED5      | 0,80 |
| C-type lectin domain family 11, member A                                                                          | CLEC11A    | 0,80 |
| nuclear assembly factor 1 ribonucleoprotein                                                                       | NAF1       | 0,80 |
| hydroxycarboxylic acid receptor 3                                                                                 | HCAR3      | 0,80 |
| olfactory receptor, family 10, subfamily AC, member 1<br>(gene/pseudogene) [Source:HGNC<br>Symbol;Acc:HGNC:14758] | OR10AC1    | 0,80 |
| optic atrophy 3 (autosomal recessive, with chorea and<br>spastic paraplegia)                                      | OPA3       | 0,80 |
| advanced glycosylation end product-specific receptor                                                              | AGER       | 0,80 |
| uridine monophosphate synthetase                                                                                  | UMPS       | 0,80 |
| F-box and WD repeat domain containing 8                                                                           | FBXW8      | 0,80 |
| RNA binding protein, fox-1 homolog (C. elegans) 1                                                                 | RBFox1     | 0,80 |
| cyclin-dependent kinase-like 4                                                                                    | CDKL4      | 0,80 |
| B-cell CLL/lymphoma 7B                                                                                            | BCL7B      | 0,80 |
| chromosome 18 open reading frame 42                                                                               | C18orf42   | 0,80 |
| cell division cycle 40                                                                                            | CDC40      | 0,80 |
| UTP3, small subunit (SSU) processome component,<br>homolog (S. cerevisiae)                                        | UTP3       | 0,80 |
| polymerase (DNA directed), alpha 1, catalytic subunit                                                             | POLA1      | 0,80 |
| frizzled class receptor 3                                                                                         | FZD3       | 0,80 |
| dematin actin binding protein                                                                                     | DMTN       | 0,80 |
| heat shock 70kDa protein 14                                                                                       | HSPA14     | 0,80 |

|                                                                                         |             |      |
|-----------------------------------------------------------------------------------------|-------------|------|
| DEAD (Asp-Glu-Ala-Asp) box helicase 17                                                  | DDX17       | 0,80 |
| dimethylglycine dehydrogenase                                                           | DMGDH       | 0,80 |
| eukaryotic translation initiation factor 4H                                             | EIF4H       | 0,80 |
| heterogeneous nuclear ribonucleoprotein M                                               | HNRNPM      | 0,80 |
| RNA binding motif protein 17                                                            | RBM17       | 0,80 |
| Memczak2013 ANTISENSE, coding, INTERNAL, intronic<br>best transcript NM_152756          | RICTOR      | 0,80 |
| GPN-loop GTPase 3                                                                       | GPN3        | 0,80 |
| checkpoint kinase 1                                                                     | CHEK1       | 0,80 |
| transmembrane 9 superfamily member 2                                                    | TM9SF2      | 0,80 |
| mahogunin ring finger 1, E3 ubiquitin protein ligase                                    | MGRN1       | 0,80 |
| Transcript Identified by AceView, Entrez Gene ID(s)<br>123355                           | LRRC28      | 0,80 |
| TM2 domain containing 2                                                                 | TM2D2       | 0,80 |
| telomerase reverse transcriptase                                                        | TERT        | 0,80 |
| ribosomal protein S12                                                                   | RPS12       | 0,80 |
| TMEM147 antisense RNA 1                                                                 | TMEM147-AS1 | 0,80 |
| small integral membrane protein 11A                                                     | SMIM11A     | 0,80 |
| calcium binding protein 7                                                               | CABP7       | 0,80 |
| olfactory receptor, family 7, subfamily A, member 17                                    | OR7A17      | 0,80 |
| kelch-like family member 8                                                              | KLHL8       | 0,80 |
| ectonucleoside triphosphate diphosphohydrolase 2                                        | ENTPD2      | 0,80 |
| small proline-rich protein 4                                                            | SPRR4       | 0,80 |
| signal peptidase complex subunit 3                                                      | SPCS3       | 0,80 |
| RAD54-like 2 ( <i>S. cerevisiae</i> )                                                   | RAD54L2     | 0,80 |
| ATP synthase, H <sup>+</sup> transporting, mitochondrial Fo complex<br>subunit G2       | ATP5L2      | 0,80 |
| serine/threonine kinase-like domain containing 1<br>[Source:HGNC Symbol;Acc:HGNC:28669] | STKLD1      | 0,80 |
| MANSC domain containing 1                                                               | MANSC1      | 0,80 |
| cation channel, sperm associated 2                                                      | CATSPER2    | 0,80 |
| tumor protein p63 regulated 1                                                           | TPRG1       | 0,80 |
| peptidyl arginine deiminase, type I                                                     | PADI1       | 0,79 |
| suppressor of tumorigenicity 20                                                         | ST20        | 0,79 |
| Memczak2013 ANTISENSE, coding, INTERNAL, intronic<br>best transcript NM_152996          | ST6GALNAC3  | 0,79 |
| nitric oxide synthase 2, inducible                                                      | NOS2        | 0,79 |
| MOK protein kinase                                                                      | MOK         | 0,79 |
| translocase of inner mitochondrial membrane 17<br>homolog A (yeast)                     | TIMM17A     | 0,79 |
| taxilin gamma pseudogene, Y-linked                                                      | TXLNGY      | 0,79 |
| olfactory receptor, family 8, subfamily J, member 2<br>(gene/pseudogene)                | OR8J2       | 0,79 |
| TAM41 mitochondrial translocator assembly and<br>maintenance homolog                    | TAMM41      | 0,79 |

|                                                                                                                                              |                  |      |
|----------------------------------------------------------------------------------------------------------------------------------------------|------------------|------|
| phospholamban                                                                                                                                | PLN              | 0,79 |
| ribosomal protein L9                                                                                                                         | RPL9             | 0,79 |
| ADAM metallopeptidase with thrombospondin type 1 motif 19                                                                                    | ADAMTS19         | 0,79 |
| complement component 1, q subcomponent binding protein                                                                                       | C1QBP            | 0,79 |
| zinc finger and BTB domain containing 22                                                                                                     | ZBTB22           | 0,79 |
| splicing factor 3b subunit 3                                                                                                                 | SF3B3            | 0,79 |
| trinucleotide repeat containing 6C                                                                                                           | TNRC6C           | 0,79 |
| glycogen synthase 1 (muscle)                                                                                                                 | GYS1             | 0,79 |
| NADH dehydrogenase (ubiquinone) 1 alpha subcomplex, 10, 42kDa                                                                                | NDUFA10          | 0,79 |
| ZNF436 antisense RNA 1                                                                                                                       | ZNF436-AS1       | 0,79 |
| CCZ1 homolog, vacuolar protein trafficking and biogenesis associated; CCZ1 homolog B, vacuolar protein trafficking and biogenesis associated | CCZ1; CCZ1B      | 0,79 |
| EWS RNA binding protein 1                                                                                                                    | EWSR1            | 0,79 |
| long intergenic non-protein coding RNA 1521                                                                                                  | LINC01521        | 0,79 |
| euchromatic histone-lysine N-methyltransferase 1                                                                                             | EHMT1            | 0,79 |
| chromosome 17 open reading frame 58                                                                                                          | C17orf58         | 0,79 |
| PRAME family member 7; PRAME family member 8                                                                                                 | PRAMEF7; PRAMEF8 | 0,79 |
| polymerase (RNA) III (DNA directed) polypeptide A, 155kDa                                                                                    | POLR3A           | 0,79 |
| sodium channel, voltage gated, type XI alpha subunit                                                                                         | SCN11A           | 0,79 |
| keratin associated protein 9-1                                                                                                               | KRTAP9-1         | 0,79 |
| inositol polyphosphate-5-phosphatase D                                                                                                       | INPP5D           | 0,79 |
| phosphatidylinositol glycan anchor biosynthesis class S                                                                                      | PIGS             | 0,79 |
| chitinase 1 (chitotriosidase)                                                                                                                | CHIT1            | 0,79 |
| cytochrome c oxidase assembly factor 3                                                                                                       | COA3             | 0,79 |
| signal peptide, CUB domain, EGF-like 3                                                                                                       | SCUBE3           | 0,79 |
| ceramide synthase 3                                                                                                                          | CERS3            | 0,79 |
| tubulin, gamma complex associated protein 3                                                                                                  | TUBGCP3          | 0,79 |
| G protein-coupled receptor 173                                                                                                               | GPR173           | 0,79 |
| maturin, neural progenitor differentiation regulator homolog (Xenopus)                                                                       | MTURN            | 0,79 |
| family with sequence similarity 84, member B                                                                                                 | FAM84B           | 0,79 |
| SRY box 18                                                                                                                                   | SOX18            | 0,79 |
| NK6 homeobox 2                                                                                                                               | NKX6-2           | 0,79 |
| regulator of G-protein signaling 16                                                                                                          | RGS16            | 0,79 |
| chromosome 11 open reading frame 58                                                                                                          | C11orf58         | 0,79 |
| caspase recruitment domain family, member 10                                                                                                 | CARD10           | 0,79 |
| olfactory receptor, family 10, subfamily K, member 1                                                                                         | OR10K1           | 0,79 |
| chromosome 3 open reading frame 20                                                                                                           | C3orf20          | 0,79 |
| hydroxymethylbilane synthase                                                                                                                 | HMBS             | 0,79 |

|                                                                                                                                                                                                                |                                                                                |      |
|----------------------------------------------------------------------------------------------------------------------------------------------------------------------------------------------------------------|--------------------------------------------------------------------------------|------|
| PTPN13-like, Y-linked 2; PTPN13-like, Y-linked stomatin (EPB72)-like 2                                                                                                                                         | PRY2; PRY                                                                      | 0,79 |
| protein-kinase, interferon-inducible double stranded RNA dependent inhibitor, repressor of (P58 repressor)                                                                                                     | STOML2                                                                         | 0,79 |
| PRKRIR                                                                                                                                                                                                         |                                                                                | 0,79 |
| sphingomyelin phosphodiesterase 2, neutral membrane (neutral sphingomyelinase)                                                                                                                                 | SMPD2                                                                          | 0,79 |
| CD101 molecule                                                                                                                                                                                                 | CD101                                                                          | 0,79 |
| ADP-ribosylation factor 4                                                                                                                                                                                      | ARF4                                                                           | 0,79 |
| F-box and WD repeat domain containing 11                                                                                                                                                                       | FBXW11                                                                         | 0,79 |
| ring finger protein 214                                                                                                                                                                                        | RNF214                                                                         | 0,79 |
| glycoprotein A33 (transmembrane)                                                                                                                                                                               | GPA33                                                                          | 0,79 |
| tubulin, gamma complex associated protein 5                                                                                                                                                                    | TUBGCP5                                                                        | 0,79 |
| protease, serine 35                                                                                                                                                                                            | PRSS35                                                                         | 0,79 |
| doublecortin-like kinase 2                                                                                                                                                                                     | DCLK2                                                                          | 0,79 |
| zinc finger CCCH-type, antiviral 1                                                                                                                                                                             | ZC3HAV1                                                                        | 0,79 |
| arylsulfatase family, member J                                                                                                                                                                                 | ARSJ                                                                           | 0,79 |
| Memczak2013 ANTISENSE, coding, INTERNAL, UTR3 best transcript NM_175920                                                                                                                                        | LNPEP                                                                          | 0,79 |
| angio-associated migratory cell protein                                                                                                                                                                        | AAMP                                                                           | 0,79 |
| forkhead box D4-like 1                                                                                                                                                                                         | FOXD4L1                                                                        | 0,79 |
| Memczak2013 ALT_ACCEPTOR, ALT_DONOR, coding, INTERNAL, intronic best transcript NM_001204883                                                                                                                   | RAB43                                                                          | 0,79 |
| olfactory receptor, family 5, subfamily B, member 3                                                                                                                                                            | OR5B3                                                                          | 0,79 |
| phosphatidylinositol 4-kinase, catalytic, alpha pseudogene 1                                                                                                                                                   | PI4KAP1                                                                        | 0,79 |
| cysteine-rich secretory protein 1                                                                                                                                                                              | CRISP1                                                                         | 0,79 |
| protease, serine, 21 (testisin)                                                                                                                                                                                | PRSS21                                                                         | 0,79 |
| Memczak2013 ALT_ACCEPTOR, ALT_DONOR, coding, INTERNAL, intronic best transcript NM_001006634                                                                                                                   | ARHGAP17                                                                       | 0,79 |
| tumor protein p53 inducible protein 13                                                                                                                                                                         | TP53I13                                                                        | 0,79 |
| CCNT2 antisense RNA 1                                                                                                                                                                                          | CCNT2-AS1                                                                      | 0,79 |
| HAUS augmin like complex subunit 5                                                                                                                                                                             | HAUS5                                                                          | 0,79 |
| adaptor-related protein complex 5, sigma 1 subunit                                                                                                                                                             | AP5S1                                                                          | 0,79 |
| RAD21 cohesin complex component like 1                                                                                                                                                                         | RAD21L1                                                                        | 0,79 |
| NOP56 ribonucleoprotein; small nucleolar RNA, C/D box 57; small nucleolar RNA, C/D box 56; small nucleolar RNA, H/ACA box 51; small nucleolar RNA, C/D box 110; small nucleolar RNA, C/D box 86; microRNA 1292 | NOP56;<br>SNORD57;<br>SNORD56;<br>SNORA51;<br>SNORD110;<br>SNORD86;<br>MIR1292 | 0,79 |
| chromosome 14 open reading frame 93                                                                                                                                                                            | C14orf93                                                                       | 0,79 |
| insulin-like 5                                                                                                                                                                                                 | INSL5                                                                          | 0,79 |
| G-patch domain containing 8                                                                                                                                                                                    | GPATCH8                                                                        | 0,79 |
| protein phosphatase 1, regulatory subunit 3A                                                                                                                                                                   | PPP1R3A                                                                        | 0,79 |

|                                                                                                                                                                                                                                                                                                                                     |            |      |
|-------------------------------------------------------------------------------------------------------------------------------------------------------------------------------------------------------------------------------------------------------------------------------------------------------------------------------------|------------|------|
| Zhang2013 ALT_ACCEPTOR, ALT_DONOR, coding, INTERNAL, intronic best transcript NM_018198                                                                                                                                                                                                                                             | DNAJC11    | 0,79 |
| inositol polyphosphate-4-phosphatase type II B                                                                                                                                                                                                                                                                                      | INPP4B     | 0,79 |
| necdin-like 2, SMC5-SMC6 complex component                                                                                                                                                                                                                                                                                          | NDNL2      | 0,79 |
| DMRT-like family C2                                                                                                                                                                                                                                                                                                                 | DMRTC2     | 0,79 |
| protein phosphatase 4, regulatory subunit 3A                                                                                                                                                                                                                                                                                        | PPP4R3A    | 0,79 |
| chromosome 16 open reading frame 95                                                                                                                                                                                                                                                                                                 | C16orf95   | 0,79 |
| PYD and CARD domain containing                                                                                                                                                                                                                                                                                                      | PYCARD     | 0,79 |
| zinc finger protein 37A                                                                                                                                                                                                                                                                                                             | ZNF37A     | 0,79 |
| olfactory receptor, family 56, subfamily A, member 5                                                                                                                                                                                                                                                                                | OR56A5     | 0,79 |
| chondroitin sulfate N-acetylgalactosaminyltransferase 1                                                                                                                                                                                                                                                                             | CSGALNACT1 | 0,79 |
| POC1 centriolar protein A                                                                                                                                                                                                                                                                                                           | POC1A      | 0,79 |
| 15 kDa selenoprotein; Salzman2013 ANNOTATED, CDS, coding, INTERNAL, OVCODE, OVEXON best transcript NM_004261; Transcript Identified by AceView, Entrez Gene ID(s) 9403, RefSeq ID(s) NM_203341; Transcript Identified by AceView, Entrez Gene ID(s) 9403, RefSeq ID(s) NM_004261; 15 kDa selenoprotein [Source:EntrezGene;Acc:9403] | sept-15    | 0,79 |
| KRI1 homolog                                                                                                                                                                                                                                                                                                                        | KRI1       | 0,79 |
| patatin-like phospholipase domain containing 4                                                                                                                                                                                                                                                                                      | PNPLA4     | 0,79 |
| cleavage and polyadenylation specific factor 4                                                                                                                                                                                                                                                                                      | CPSF4      | 0,79 |
| fibroblast growth factor binding protein 1                                                                                                                                                                                                                                                                                          | FGFBP1     | 0,79 |
| proliferating cell nuclear antigen                                                                                                                                                                                                                                                                                                  | PCNA       | 0,79 |
| solute carrier family 2 (facilitated glucose transporter), member 6 [Source:HGNC Symbol;Acc:HGNC:11011]                                                                                                                                                                                                                             | SLC2A6     | 0,79 |
| solute carrier family 25 (mitochondrial oxoadipate carrier), member 21                                                                                                                                                                                                                                                              | SLC25A21   | 0,79 |
| regulator of chromosome condensation (RCC1) and BTB (POZ) domain containing protein 2                                                                                                                                                                                                                                               | RCBTB2     | 0,79 |
| out at first homolog                                                                                                                                                                                                                                                                                                                | OAF        | 0,79 |
| golgi transport 1B                                                                                                                                                                                                                                                                                                                  | GOLT1B     | 0,79 |
| lipase, family member N                                                                                                                                                                                                                                                                                                             | LIPN       | 0,79 |
| killin, p53-regulated DNA replication inhibitor                                                                                                                                                                                                                                                                                     | KLLN       | 0,79 |
| carbohydrate (N-acetylglucosamine 6-O) sulfotransferase 6                                                                                                                                                                                                                                                                           | CHST6      | 0,79 |
| zinc finger protein 517                                                                                                                                                                                                                                                                                                             | ZNF517     | 0,79 |
| major histocompatibility complex, class I, V (pseudogene)                                                                                                                                                                                                                                                                           | HLA-V      | 0,79 |
| WD repeat domain 61                                                                                                                                                                                                                                                                                                                 | WDR61      | 0,79 |
| eukaryotic translation initiation factor 2B, subunit 4 delta, 67kDa                                                                                                                                                                                                                                                                 | EIF2B4     | 0,79 |
| DEAH (Asp-Glu-Ala-His) box helicase 30                                                                                                                                                                                                                                                                                              | DHX30      | 0,79 |
| anoctamin 6                                                                                                                                                                                                                                                                                                                         | ANO6       | 0,79 |
| ribosomal protein L7a                                                                                                                                                                                                                                                                                                               | RPL7A      | 0,79 |

|                                                                                |              |      |
|--------------------------------------------------------------------------------|--------------|------|
| olfactory receptor, family 2, subfamily T, member 8                            | OR2T8        | 0,79 |
| endothelin converting enzyme-like 1                                            | ECEL1        | 0,79 |
| glucuronidase, beta                                                            | GUSB         | 0,79 |
| molybdenum cofactor sulfurase                                                  | MOCOS        | 0,79 |
| G protein-coupled receptor 22                                                  | GPR22        | 0,79 |
| pre-mRNA processing factor 39                                                  | PRPF39       | 0,79 |
| olfactory receptor, family 4, subfamily F, member 3                            | OR4F3        | 0,79 |
| double zinc ribbon and ankyrin repeat domains 1                                | DZANK1       | 0,79 |
| Transcript Identified by AceView, Entrez Gene ID(s) 91694                      | LONRF1       | 0,79 |
| thyroid hormone receptor interactor 10                                         | TRIP10       | 0,79 |
| OTU deubiquitinase 7A                                                          | OTUD7A       | 0,79 |
| galactosidase beta 1; transmembrane protein with metallophosphoesterase domain | GLB1; TMPPE  | 0,79 |
| WNK lysine deficient protein kinase 2                                          | WNK2         | 0,79 |
| SH3-domain binding protein 1; pyridoxal (pyridoxine, vitamin B6) phosphatase   | SH3BP1; PDXP | 0,79 |
| Transcript Identified by AceView, Entrez Gene ID(s) 51128                      | SAR1B        | 0,79 |
| adaptor-related protein complex 1 associated regulatory protein                | AP1AR        | 0,79 |
| calcium binding protein 39-like                                                | CAB39L       | 0,79 |
| double homeobox 1                                                              | DUX1         | 0,79 |
| catechol-O-methyltransferase domain containing 1                               | COMTD1       | 0,79 |
| SPATA31 subfamily D, member 1                                                  | SPATA31D1    | 0,79 |
| GLE1 RNA export mediator                                                       | GLE1         | 0,79 |
| granzyme M                                                                     | GZMM         | 0,79 |
| glutamic-oxaloacetic transaminase 1-like 1                                     | GOT1L1       | 0,79 |
| coiled-coil domain containing 155                                              | CCDC155      | 0,79 |
| RNA binding motif protein 45                                                   | RBM45        | 0,79 |
| Sp4 transcription factor                                                       | SP4          | 0,79 |
| chromosome 20 open reading frame 96                                            | C20orf96     | 0,79 |
| golgin A2 pseudogene 5                                                         | GOLGA2P5     | 0,79 |
| galactosidase beta 1 like 2                                                    | GLB1L2       | 0,79 |
| zinc finger protein 14                                                         | ZNF14        | 0,79 |
| carbonic anhydrase VIII                                                        | CA8          | 0,79 |
| amylase, alpha 1C (salivary); amylase, alpha 1A (salivary)                     | AMY1C; AMY1A | 0,79 |
| kelch-like family member 3                                                     | KLHL3        | 0,79 |
| calcineurin-like EF-hand protein 1                                             | CHP1         | 0,79 |
| phosphoinositide-3-kinase, regulatory subunit 5                                | PIK3R5       | 0,79 |
| membrane associated ring finger 10                                             | MARCH10      | 0,79 |
| surfeit 6                                                                      | SURF6        | 0,79 |
| family with sequence similarity 120C                                           | FAM120C      | 0,79 |
| speedy/RINGO cell cycle regulator family member E5                             | SPDYE5       | 0,79 |



|                                                                                                                                               |                        |      |
|-----------------------------------------------------------------------------------------------------------------------------------------------|------------------------|------|
| RAB37, member RAS oncogene family                                                                                                             | RAB37                  | 0,79 |
| adenylate cyclase 10 (soluble)                                                                                                                | ADCY10                 | 0,79 |
| chromosome 17 open reading frame 102                                                                                                          | C17orf102              | 0,79 |
| small nuclear ribonucleoprotein D3 polypeptide                                                                                                | SNRPD3                 | 0,79 |
| ash1 (absent, small, or homeotic)-like (Drosophila);<br>microRNA 555                                                                          | ASH1L; MIR555          | 0,79 |
| family with sequence similarity 133, member B                                                                                                 | FAM133B                | 0,79 |
| ankyrin repeat and SOCS box containing 11, E3 ubiquitin<br>protein ligase                                                                     | ASB11                  | 0,79 |
| calsequestrin 1 (fast-twitch, skeletal muscle)                                                                                                | CASQ1                  | 0,79 |
| T-box 10                                                                                                                                      | TBX10                  | 0,79 |
| trafficking protein particle complex 4                                                                                                        | TRAPPC4                | 0,79 |
| olfactory receptor, family 6, subfamily C, member 76                                                                                          | OR6C76                 | 0,79 |
| cytoskeleton associated protein 2-like                                                                                                        | CKAP2L                 | 0,79 |
| cytochrome b561 family, member D2                                                                                                             | CYB561D2               | 0,79 |
| succinate dehydrogenase complex assembly factor 1                                                                                             | SDHAF1                 | 0,79 |
| dispatched homolog 2 (Drosophila)                                                                                                             | DISP2                  | 0,79 |
| golgin A6 family-like 22; golgin A6 family-like 1                                                                                             | GOLGA6L22;<br>GOLGA6L1 | 0,79 |
| chromosome 1 open reading frame 174                                                                                                           | C1orf174               | 0,79 |
| zinc and ring finger 4                                                                                                                        | ZNRF4                  | 0,79 |
| methylenetetrahydrofolate dehydrogenase (NADP+<br>dependent) 1, methenyltetrahydrofolate cyclohydrolase,<br>formyltetrahydrofolate synthetase | MTHFD1                 | 0,79 |
| yippee like 1                                                                                                                                 | YPEL1                  | 0,79 |
| chromosome 19 open reading frame 54                                                                                                           | C19orf54               | 0,79 |
| Transcript Identified by AceView, Entrez Gene ID(s) 23358                                                                                     | USP24                  | 0,79 |
| gem nuclear organelle associated protein 6                                                                                                    | GEMIN6                 | 0,79 |
| extra spindle pole bodies like 1, separase                                                                                                    | ESPL1                  | 0,79 |
| recombination signal binding protein for immunoglobulin<br>kappa J region                                                                     | RBPJ                   | 0,79 |
| solute carrier family 19 (folate transporter), member 1                                                                                       | SLC19A1                | 0,79 |
| acetoacetyl-CoA synthetase                                                                                                                    | AACS                   | 0,79 |
| RELT-like 1                                                                                                                                   | RELL1                  | 0,79 |
| G-patch domain containing 1                                                                                                                   | GPATCH1                | 0,79 |
| immunoglobulin superfamily, member 21                                                                                                         | IGSF21                 | 0,79 |
| transmembrane protein 254                                                                                                                     | TMEM254                | 0,79 |
| G-patch domain containing 2                                                                                                                   | GPATCH2                | 0,79 |
| Transcript Identified by AceView, Entrez Gene ID(s)<br>118424                                                                                 | UBE2J2                 | 0,79 |
| transmembrane protein 266                                                                                                                     | TMEM266                | 0,79 |
| cell division cycle 25C                                                                                                                       | CDC25C                 | 0,79 |
| activator of basal transcription 1                                                                                                            | ABT1                   | 0,79 |
| sel-1 suppressor of lin-12-like (C. elegans)                                                                                                  | SEL1L                  | 0,79 |

|                                                                                                                  |                                     |      |
|------------------------------------------------------------------------------------------------------------------|-------------------------------------|------|
| ankyrin repeat and SOCS box containing 7                                                                         | ASB7                                | 0,79 |
| peptidylprolyl isomerase G (cyclophilin G)                                                                       | PPIG                                | 0,79 |
| kallikrein related peptidase 10                                                                                  | KLK10                               | 0,79 |
| zinc finger protein 546                                                                                          | ZNF546                              | 0,79 |
| tumor necrosis factor, alpha-induced protein 6                                                                   | TNFAIP6                             | 0,79 |
| gamma-aminobutyric acid (GABA) A receptor, gamma 1                                                               | GABRG1                              | 0,79 |
| tripartite motif containing 28                                                                                   | TRIM28                              | 0,79 |
| Eukaryotic translation initiation factor 3 subunit F<br>[Source:UniProtKB/Swiss-Prot;Acc:O00303]                 | EIF3F                               | 0,79 |
| kelch-like family member 42                                                                                      | KLHL42                              | 0,79 |
| ribosomal protein S13; small nucleolar RNA, C/D box 14B                                                          | RPS13;<br>SNORD14B                  | 0,79 |
| transmembrane protein 26                                                                                         | TMEM26                              | 0,79 |
| oligodendrocyte myelin glycoprotein                                                                              | OMG                                 | 0,79 |
| thymosin beta 15B                                                                                                | TMSB15B                             | 0,78 |
| tetratricopeptide repeat domain 5                                                                                | TTC5                                | 0,78 |
| oxoglutarate dehydrogenase-like                                                                                  | OGDHL                               | 0,78 |
| olfactory receptor, family 13, subfamily C, member 7<br>(gene/pseudogene) [Source:HGNC<br>Symbol;Acc:HGNC:15102] | OR13C7                              | 0,78 |
| pancreatic lipase-related protein 1                                                                              | PNLIPRP1                            | 0,78 |
| aurora kinase A                                                                                                  | AURKA                               | 0,78 |
| zinc finger protein 445                                                                                          | ZNF445                              | 0,78 |
| diphthamide biosynthesis 3 pseudogene 1                                                                          | DPH3P1                              | 0,78 |
| ribosomal protein S6 kinase, 90kDa, polypeptide 1                                                                | RPS6KA1                             | 0,78 |
| taste receptor, type 2, member 19                                                                                | TAS2R19                             | 0,78 |
| methionyl aminopeptidase type 1D (mitochondrial)                                                                 | METAP1D                             | 0,78 |
| F-box and leucine-rich repeat protein 19                                                                         | FBXL19                              | 0,78 |
| glycine amidinotransferase (L-arginine:glycine<br>amidinotransferase)                                            | GATM                                | 0,78 |
| heterogeneous nuclear ribonucleoprotein L                                                                        | HNRNPL                              | 0,78 |
| DENN/MADD domain containing 6B                                                                                   | DENND6B                             | 0,78 |
| uncharacterized LOC283710; novel transcript; Transcript<br>Identified by AceView                                 | LOC283710; RP11-<br>16E12.2; rukama | 0,78 |
| matrilin 2                                                                                                       | MATN2                               | 0,78 |
| phosphorylase kinase, gamma 1 (muscle)                                                                           | PHKG1                               | 0,78 |
| sec1 family domain containing 1                                                                                  | SCFD1                               | 0,78 |
| heat shock transcription factor 2                                                                                | HSF2                                | 0,78 |
| glucagon                                                                                                         | GCG                                 | 0,78 |
| X-linked Kx blood group related 4                                                                                | XKR4                                | 0,78 |
| tyrosine kinase, non-receptor, 2                                                                                 | TNK2                                | 0,78 |
| TBC1 domain family, member 14                                                                                    | TBC1D14                             | 0,78 |
| cystic fibrosis transmembrane conductance regulator                                                              | CFTR                                | 0,78 |
| ras homolog family member T1                                                                                     | RHOT1                               | 0,78 |

|                                                                                                           |                  |      |
|-----------------------------------------------------------------------------------------------------------|------------------|------|
| chromosome 11 open reading frame 84                                                                       | C11orf84         | 0,78 |
| potassium channel, voltage gated Shaw related subfamily C, member 2                                       | KCNC2            | 0,78 |
| polymerase (RNA) I polypeptide B                                                                          | POLR1B           | 0,78 |
| diacylglycerol kinase, delta 130kDa                                                                       | DGKD             | 0,78 |
| hepatoma derived growth factor-like 1                                                                     | HDGFL1           | 0,78 |
| lactamase, beta-like 1                                                                                    | LACTBL1          | 0,78 |
| YY1 associated protein 1                                                                                  | YY1AP1           | 0,78 |
| cyclin E1                                                                                                 | CCNE1            | 0,78 |
| ribosomal protein L37a                                                                                    | RPL37A           | 0,78 |
| mucin 1, cell surface associated                                                                          | MUC1             | 0,78 |
| cadherin-related family member 3                                                                          | CDHR3            | 0,78 |
| aldehyde dehydrogenase 3 family, member B2                                                                | ALDH3B2          | 0,78 |
| transmembrane protein 134                                                                                 | TMEM134          | 0,78 |
| long intergenic non-protein coding RNA 934                                                                | LINC00934        | 0,78 |
| G protein-coupled receptor kinase 1                                                                       | GRK1             | 0,78 |
| cytidine monophosphate (UMP-CMP) kinase 2, mitochondrial                                                  | CMPK2            | 0,78 |
| poly(rC) binding protein 1                                                                                | PCBP1            | 0,78 |
| phosphodiesterase 6B, cGMP-specific, rod, beta                                                            | PDE6B            | 0,78 |
| serpin peptidase inhibitor, clade B (ovalbumin), member 6                                                 | SERPINB6         | 0,78 |
| retinal G protein coupled receptor                                                                        | RGR              | 0,78 |
| lipin 1; microRNA 548s                                                                                    | LPIN1; MIR548S   | 0,78 |
| proline rich 5 (renal)                                                                                    | PRR5             | 0,78 |
| Dmx-like 2                                                                                                | DMXL2            | 0,78 |
| mitogen-activated protein kinase-activated protein kinase 5; ADAM metallopeptidase domain 1A (pseudogene) | MAPKAPK5; ADAM1A | 0,78 |
| chloride channel, nucleotide-sensitive, 1A                                                                | CLNS1A           | 0,78 |
| CTAGE family, member 5                                                                                    | CTAGE5           | 0,78 |
| ribosomal protein L30                                                                                     | RPL30            | 0,78 |
| PDZ domain containing 8                                                                                   | PDZD8            | 0,78 |
| olfactory receptor, family 8, subfamily G, member 1 (gene/pseudogene)                                     | OR8G1            | 0,78 |
| proline rich 34                                                                                           | PRR34            | 0,78 |
| KIAA0100                                                                                                  | KIAA0100         | 0,78 |
| interferon regulatory factor 2                                                                            | IRF2             | 0,78 |
| doublecortin                                                                                              | DCX              | 0,78 |
| bromodomain and WD repeat domain containing 1                                                             | BRWD1            | 0,78 |
| kinesin family member 15                                                                                  | KIF15            | 0,78 |
| gap junction protein alpha 1                                                                              | GJA1             | 0,78 |
| Jeck2013 ANTISENSE, CDS, coding, INTERNAL, intronic, OVCODE, OVEXON best transcript NM_015466             | PTPN23           | 0,78 |

|                                                                                              |               |      |
|----------------------------------------------------------------------------------------------|---------------|------|
| olfactory receptor, family 10, subfamily C, member 1<br>(gene/pseudogene)                    | OR10C1        | 0,78 |
| solute carrier family 17 (organic anion transporter),<br>member 1                            | SLC17A1       | 0,78 |
| non-POU domain containing, octamer-binding                                                   | NONO          | 0,78 |
| protein phosphatase 4, regulatory subunit 3B                                                 | PPP4R3B       | 0,78 |
| protease, serine, 57                                                                         | PRSS57        | 0,78 |
| cubilin (intrinsic factor-cobalamin receptor)                                                | CUBN          | 0,78 |
| ribosomal protein SA pseudogene 58; ribosomal protein<br>SA                                  | RPSAP58; RPSA | 0,78 |
| zinc finger protein 546                                                                      | ZNF546        | 0,78 |
| Memczak2013 ANTISENSE, CDS, coding, INTERNAL, UTR3<br>best transcript NM_005999              | TSNAX         | 0,78 |
| Transcript Identified by AceView, Entrez Gene ID(s) 10211                                    | FLOT1         | 0,78 |
| secreted frizzled-related protein 2                                                          | SFRP2         | 0,78 |
| chromosome 14 open reading frame 132                                                         | C14orf132     | 0,78 |
| SOS Ras/Rho guanine nucleotide exchange factor 2                                             | SOS2          | 0,78 |
| tryptophan rich basic protein                                                                | WRB           | 0,78 |
| protein tyrosine kinase 2 beta                                                               | PTK2B         | 0,78 |
| protease, serine, 3                                                                          | PRSS3         | 0,78 |
| sorting nexin 15                                                                             | SNX15         | 0,78 |
| olfactory receptor, family 2, subfamily T, member 12                                         | OR2T12        | 0,78 |
| carcinoembryonic antigen-related cell adhesion molecule<br>3                                 | CEACAM3       | 0,78 |
| tumor-associated calcium signal transducer 2                                                 | TACSTD2       | 0,78 |
| transmembrane protein 183B                                                                   | TMEM183B      | 0,78 |
| RNA pseudouridylate synthase domain containing 2                                             | RPUSD2        | 0,78 |
| peroxisomal biogenesis factor 12                                                             | PEX12         | 0,78 |
| brain abundant, membrane attached signal protein 1                                           | BASP1         | 0,78 |
| hydroxymethylbilane synthase                                                                 | HMBS          | 0,78 |
| transcription elongation factor A (SII)-like 7                                               | TCEAL7        | 0,78 |
| spermatogenesis associated 4                                                                 | SPATA4        | 0,78 |
| chromodomain protein, Y-linked, 1B; chromodomain<br>protein, Y-linked, 1                     | CDY1B; CDY1   | 0,78 |
| ArfGAP with GTPase domain, ankyrin repeat and PH<br>domain 4                                 | AGAP4         | 0,78 |
| Memczak2013 ANTISENSE, CDS, coding, INTERNAL,<br>intronic, UTR3 best transcript NM_001099678 | LRRC58        | 0,78 |
| lymphocyte antigen 6 complex, locus G6E (pseudogene)                                         | LY6G6E        | 0,78 |
| chromosome 14 open reading frame 166                                                         | C14orf166     | 0,78 |
| radial spoke head 4 homolog A (Chlamydomonas)                                                | RSPH4A        | 0,78 |
| NACC family member 2, BEN and BTB (POZ) domain<br>containing                                 | NACC2         | 0,78 |
| NOP14 nucleolar protein                                                                      | NOP14         | 0,78 |

|                                                                                                                  |                     |      |
|------------------------------------------------------------------------------------------------------------------|---------------------|------|
| cytochrome P450, family 2, subfamily R, polypeptide 1                                                            | CYP2R1              | 0,78 |
| serine/threonine kinase-like domain containing 1                                                                 | STKLD1              | 0,78 |
| pleiotrophin                                                                                                     | PTN                 | 0,78 |
| HD domain containing 3                                                                                           | HDDC3               | 0,78 |
| dipeptidyl-peptidase 4                                                                                           | DPP4                | 0,78 |
| SHC (Src homology 2 domain containing) transforming protein 2                                                    | SHC2                | 0,78 |
| olfactory receptor, family 1, subfamily C, member 1                                                              | OR1C1               | 0,78 |
| dynein, axonemal, assembly factor 2                                                                              | DNAAF2              | 0,78 |
| cullin 1                                                                                                         | CUL1                | 0,78 |
| solute carrier family 16 (monocarboxylate transporter), member 1                                                 | SLC16A1             | 0,78 |
| telomeric repeat binding factor (NIMA-interacting) 1                                                             | TERF1               | 0,78 |
| protoporphyrinogen oxidase                                                                                       | PPOX                | 0,78 |
| olfactomedin like 2B                                                                                             | OLFML2B             | 0,78 |
| histone cluster 4, H4                                                                                            | HIST4H4             | 0,78 |
| guanine nucleotide binding protein (G protein), beta polypeptide 4                                               | GNB4                | 0,78 |
| Rho guanine nucleotide exchange factor 17                                                                        | ARHGEF17            | 0,78 |
| cysteine-rich PAK1 inhibitor                                                                                     | CRIPAK              | 0,78 |
| chromatin target of PRMT1                                                                                        | CHTOP               | 0,78 |
| chemokine (C motif) ligand 2                                                                                     | XCL2                | 0,78 |
| transcription factor 7-like 1 (T-cell specific, HMG-box)                                                         | TCF7L1              | 0,78 |
| ZFP92 zinc finger protein                                                                                        | ZFP92               | 0,78 |
| mex-3 RNA binding family member D                                                                                | MEX3D               | 0,78 |
| Memczak2013 ANTISENSE, coding, INTERNAL, intronic best transcript NM_001033556                                   | PPM1B               | 0,78 |
| decapping enzyme, scavenger                                                                                      | DCPS                | 0,78 |
| Memczak2013 ALT_ACCEPTOR, ALT_DONOR, coding, INTERNAL, intronic best transcript NM_033028                        | BBS4                | 0,78 |
| sperm antigen with calponin homology and coiled-coil domains 1-like                                              | SPECC1L             | 0,78 |
| Rab interacting lysosomal protein-like 1                                                                         | RILPL1              | 0,78 |
| solute carrier family 25 (mitochondrial carrier; phosphate carrier), member 3; small nucleolar RNA, H/ACA box 53 | SLC25A3;<br>SNORA53 | 0,78 |
| protein tyrosine phosphatase, receptor type, S                                                                   | PTPRS               | 0,78 |
| melanin-concentrating hormone receptor 2                                                                         | MCHR2               | 0,78 |
| exocyst complex component 7; microRNA 6868                                                                       | EXOC7; MIR6868      | 0,78 |
| transmembrane protein 202                                                                                        | TMEM202             | 0,78 |
| SHANK2 antisense RNA 3                                                                                           | SHANK2-AS3          | 0,78 |
| tetraspanin 16                                                                                                   | TSPAN16             | 0,78 |
| cilia and flagella associated protein 126                                                                        | CFAP126             | 0,78 |
| Enah/Vasp-like                                                                                                   | EVL                 | 0,78 |
| somatostatin                                                                                                     | SST                 | 0,78 |

|                                                                                                                                                                                                                                                                                                                                                                                                                                                                                   |                |      |
|-----------------------------------------------------------------------------------------------------------------------------------------------------------------------------------------------------------------------------------------------------------------------------------------------------------------------------------------------------------------------------------------------------------------------------------------------------------------------------------|----------------|------|
| aspartyl aminopeptidase                                                                                                                                                                                                                                                                                                                                                                                                                                                           | DNPEP          | 0,78 |
| CD99 molecule                                                                                                                                                                                                                                                                                                                                                                                                                                                                     | CD99           | 0,78 |
| transmembrane protein 247                                                                                                                                                                                                                                                                                                                                                                                                                                                         | TMEM247        | 0,78 |
| dual specificity phosphatase 16                                                                                                                                                                                                                                                                                                                                                                                                                                                   | DUSP16         | 0,78 |
| keratin associated protein 4-6                                                                                                                                                                                                                                                                                                                                                                                                                                                    | KRTAP4-6       | 0,78 |
| nuclear receptor coactivator 6                                                                                                                                                                                                                                                                                                                                                                                                                                                    | NCOA6          | 0,78 |
| ST7 antisense RNA 1                                                                                                                                                                                                                                                                                                                                                                                                                                                               | ST7-AS1        | 0,78 |
| Purkinje cell protein 2                                                                                                                                                                                                                                                                                                                                                                                                                                                           | PCP2           | 0,78 |
| solute carrier family 18 (vesicular monoamine transporter), member 1                                                                                                                                                                                                                                                                                                                                                                                                              | SLC18A1        | 0,78 |
| tweety family member 3                                                                                                                                                                                                                                                                                                                                                                                                                                                            | TTYH3          | 0,78 |
| metaxin 3                                                                                                                                                                                                                                                                                                                                                                                                                                                                         | MTX3           | 0,78 |
| hydroxy-delta-5-steroid dehydrogenase, 3 beta- and steroid delta-isomerase 7                                                                                                                                                                                                                                                                                                                                                                                                      | HSD3B7         | 0,78 |
| adenylosuccinate lyase                                                                                                                                                                                                                                                                                                                                                                                                                                                            | ADSL           | 0,78 |
| syntaxin 10                                                                                                                                                                                                                                                                                                                                                                                                                                                                       | STX10          | 0,78 |
| ubiquitin-like modifier activating enzyme 2                                                                                                                                                                                                                                                                                                                                                                                                                                       | UBA2           | 0,78 |
| Zhang2013 ALT_ACCEPTOR, ALT_DONOR, coding, INTERNAL, intronic best transcript NM_032737                                                                                                                                                                                                                                                                                                                                                                                           | LMNB2          | 0,78 |
| cleavage stimulation factor, 3 pre-RNA, subunit 3                                                                                                                                                                                                                                                                                                                                                                                                                                 | CSTF3          | 0,78 |
| apolipoprotein B mRNA editing enzyme, catalytic polypeptide-like 2                                                                                                                                                                                                                                                                                                                                                                                                                | APOBEC2        | 0,78 |
| translin-associated factor X interacting protein 1                                                                                                                                                                                                                                                                                                                                                                                                                                | TSNAXIP1       | 0,78 |
| sprouty RTK signaling antagonist 3                                                                                                                                                                                                                                                                                                                                                                                                                                                | SPRY3          | 0,78 |
| Homo sapiens sprouty RTK signaling antagonist 3 (SPRY3), transcript variant 1, mRNA.; sprouty homolog 3 (Drosophila) [Source:HGNC Symbol;Acc:HGNC:11271]; Homo sapiens sprouty homolog 3 (Drosophila), mRNA (cDNA clone MGC:97072 IMAGE:7262284), complete cds.; Homo sapiens sprouty homolog 3 (Drosophila), mRNA (cDNA clone MGC:103904 IMAGE:30915293), complete cds.; Homo sapiens sprouty homolog 3 (Drosophila), mRNA (cDNA clone MGC:104063 IMAGE:30915511), complete cds. | SPRY3          | 0,78 |
| regulator of G-protein signaling 3                                                                                                                                                                                                                                                                                                                                                                                                                                                | RGS3           | 0,78 |
| SRY box 10                                                                                                                                                                                                                                                                                                                                                                                                                                                                        | SOX10          | 0,78 |
| Memczak2013 ALT_ACCEPTOR, ALT_DONOR, coding, INTERNAL, intronic best transcript NM_001142333                                                                                                                                                                                                                                                                                                                                                                                      | RBFOX1         | 0,78 |
| DEAH (Asp-Glu-Ala-His) box helicase 9                                                                                                                                                                                                                                                                                                                                                                                                                                             | DHX9           | 0,78 |
| small ArfGAP2                                                                                                                                                                                                                                                                                                                                                                                                                                                                     | SMAP2          | 0,78 |
| regulator of chromosome condensation 2                                                                                                                                                                                                                                                                                                                                                                                                                                            | RCC2           | 0,78 |
| vesicle (multivesicular body) trafficking 1                                                                                                                                                                                                                                                                                                                                                                                                                                       | VTA1           | 0,78 |
| MKL/myocardin-like 2; TVP23C pseudogene 2                                                                                                                                                                                                                                                                                                                                                                                                                                         | MKL2; TVP23CP2 | 0,78 |
| lectin, mannose-binding 2                                                                                                                                                                                                                                                                                                                                                                                                                                                         | LMAN2          | 0,78 |
| hemoglobin, gamma G; hemoglobin, gamma A                                                                                                                                                                                                                                                                                                                                                                                                                                          | HBG2; HBG1     | 0,78 |

|                                                                                             |                 |      |
|---------------------------------------------------------------------------------------------|-----------------|------|
| CHKB-CPT1B readthrough (NMD candidate)                                                      | CHKB-CPT1B      | 0,78 |
| dynein heavy chain domain 1                                                                 | DNHD1           | 0,78 |
| Transcript Identified by AceView, Entrez Gene ID(s)<br>153129                               | SLC38A9         | 0,78 |
| solute carrier family 25 (mitochondrial carrier; adenine nucleotide translocator), member 6 | SLC25A6         | 0,78 |
| acid phosphatase 1, soluble                                                                 | ACP1            | 0,78 |
| dimethylglycine dehydrogenase                                                               | DMGDH           | 0,78 |
| eukaryotic translation initiation factor 4 gamma, 3                                         | EIF4G3          | 0,78 |
| potassium channel tetramerization domain containing 21                                      | KCTD21          | 0,78 |
| hedgehog acyltransferase                                                                    | HHAT            | 0,78 |
| phospholipase A2, group III                                                                 | PLA2G3          | 0,78 |
| olfactory receptor, family 1, subfamily F, member 1                                         | OR1F1           | 0,78 |
| autophagy related 9A                                                                        | ATG9A           | 0,78 |
| KAT8 regulatory NSL complex subunit 3                                                       | KANSL3          | 0,78 |
| KH-type splicing regulatory protein; microRNA 3940                                          | KHSRP; MIR3940  | 0,78 |
| guanine nucleotide binding protein-like 3 (nucleolar); small nucleolar RNA, C/D box 19B     | GNL3; SNORD19B  | 0,78 |
| chibby homolog 1 (Drosophila)                                                               | CBY1            | 0,78 |
| chromodomain helicase DNA binding protein 9                                                 | CHD9            | 0,78 |
| mal, T-cell differentiation protein                                                         | MAL             | 0,78 |
| claudin domain containing 2                                                                 | CLDND2          | 0,78 |
| indian hedgehog                                                                             | IHH             | 0,78 |
| gamma-glutamyltransferase light chain 1                                                     | GGTLC1          | 0,78 |
| zinc finger protein 91                                                                      | ZNF91           | 0,78 |
| uncharacterized protein MGC27345                                                            | MGC27345        | 0,78 |
| ubiquitin specific peptidase 22                                                             | USP22           | 0,78 |
| DNA replication helicase/nuclease 2                                                         | DNA2            | 0,78 |
| ferredoxin 1                                                                                | FDX1            | 0,78 |
| ADP-ribosylation factor 5                                                                   | ARF5            | 0,78 |
| dynein, axonemal, light chain 1                                                             | DNAL1           | 0,78 |
| transmembrane protein with EGF-like and two follistatin-like domains 1                      | TMEFF1          | 0,78 |
| cytochrome c oxidase subunit VIIa polypeptide 2 like                                        | COX7A2L         | 0,78 |
| keratin associated protein 19-6                                                             | KRTAP19-6       | 0,78 |
| protein arginine methyltransferase 7                                                        | PRMT7           | 0,78 |
| Vpr (HIV-1) binding protein                                                                 | VPRBP           | 0,78 |
| oncoprotein induced transcript 3                                                            | OIT3            | 0,78 |
| ribosomal protein L18a; small nucleolar RNA, H/ACA box 68                                   | RPL18A; SNORA68 | 0,78 |
| xylosyltransferase I                                                                        | XYLT1           | 0,78 |
| NHL repeat containing 2                                                                     | NHLRC2          | 0,78 |
| X-linked Kx blood group related 8                                                           | XKR8            | 0,78 |
| BCL2-like 14 (apoptosis facilitator)                                                        | BCL2L14         | 0,78 |

|                                                                                                                                                                                                                                           |                                                  |      |
|-------------------------------------------------------------------------------------------------------------------------------------------------------------------------------------------------------------------------------------------|--------------------------------------------------|------|
| solute carrier family 25 (mitochondrial carrier; adenine nucleotide translocator), member 6                                                                                                                                               | SLC25A6                                          | 0,78 |
| mitochondrial calcium uptake family, member 3                                                                                                                                                                                             | MICU3                                            | 0,78 |
| T cell receptor gamma joining 1; T cell receptor gamma constant 2; T cell receptor gamma joining 2; T cell receptor gamma variable 9; T cell receptor gamma constant 1; T cell receptor gamma joining P; T cell receptor gamma joining P2 | TRGJ1; TRGC2; TRGJ2; TRGV9; TRGC1; TRGJP; TRGJP2 | 0,78 |
| ZNF503 antisense RNA 2                                                                                                                                                                                                                    | ZNF503-AS2                                       | 0,78 |
| family with sequence similarity 195, member A                                                                                                                                                                                             | FAM195A                                          | 0,78 |
| von Willebrand factor C domain containing protein 2-like                                                                                                                                                                                  | VWC2L                                            | 0,78 |
| MAD2 mitotic arrest deficient-like 1 (yeast)                                                                                                                                                                                              | MAD2L1                                           | 0,78 |
| zinc finger protein 444                                                                                                                                                                                                                   | ZNF444                                           | 0,78 |
| WD repeat domain 18                                                                                                                                                                                                                       | WDR18                                            | 0,78 |
| keratin 72, type II                                                                                                                                                                                                                       | KRT72                                            | 0,78 |
| zinc finger, ZZ-type with EF-hand domain 1                                                                                                                                                                                                | ZZEF1                                            | 0,78 |
| zinc finger protein 563                                                                                                                                                                                                                   | ZNF563                                           | 0,78 |
| glutathione S-transferase alpha 3                                                                                                                                                                                                         | GSTA3                                            | 0,78 |
| Zic family member 3                                                                                                                                                                                                                       | ZIC3                                             | 0,78 |
| Transcript Identified by AceView, Entrez Gene ID(s) 4642; novel transcript, sense intronic MYO1D                                                                                                                                          | RP11-466A19.5; MYO1D                             | 0,78 |
| ring finger and CCCH-type domains 2                                                                                                                                                                                                       | RC3H2                                            | 0,77 |
| Memczak2013 ALT_ACCEPTOR, ALT_DONOR, coding, INTERNAL, intronic best transcript NM_139207                                                                                                                                                 | NAP1L1                                           | 0,77 |
| chromosome 7 open reading frame 73                                                                                                                                                                                                        | C7orf73                                          | 0,77 |
| protocadherin beta 8                                                                                                                                                                                                                      | PCDHB8                                           | 0,77 |
| heat shock factor binding protein 1                                                                                                                                                                                                       | HSBP1                                            | 0,77 |
| mannosidase, beta A, lysosomal                                                                                                                                                                                                            | MANBA                                            | 0,77 |
| RNA binding motif protein 15                                                                                                                                                                                                              | RBM15                                            | 0,77 |
| tripartite motif containing 2                                                                                                                                                                                                             | TRIM2                                            | 0,77 |
| UFM1-specific ligase 1                                                                                                                                                                                                                    | UFL1                                             | 0,77 |
| chromosome 16 open reading frame 47                                                                                                                                                                                                       | C16orf47                                         | 0,77 |
| keratin associated protein 4-5                                                                                                                                                                                                            | KRTAP4-5                                         | 0,77 |
| eukaryotic translation initiation factor 2, subunit 3 gamma, 52kDa                                                                                                                                                                        | EIF2S3                                           | 0,77 |
| uncharacterized LOC100505549; Salzman2013 ANNOTATED, CDS, coding, OVCODE, OVERLAPTX, OVEXON, UTR3, UTR5 best transcript NM_001242804; novel transcript, antisense to ATP8B1                                                               | LOC100505549; RP11-35G9.3                        | 0,77 |
| fibroblast growth factor receptor substrate 2                                                                                                                                                                                             | FRS2                                             | 0,77 |
| sushi domain containing 6                                                                                                                                                                                                                 | SUSD6                                            | 0,77 |
| translocated promoter region, nuclear basket protein                                                                                                                                                                                      | TPR                                              | 0,77 |
| leucine rich repeat containing 69; microRNA 4661                                                                                                                                                                                          | LRRC69; MIR4661                                  | 0,77 |



|                                                                                                   |                       |      |
|---------------------------------------------------------------------------------------------------|-----------------------|------|
| novel transcript, antisense to KCNIP4; Transcript Identified by AceView, Entrez Gene ID(s) 133015 | RP11-362J17.1; PACRGL | 0,77 |
| SHC (Src homology 2 domain containing) transforming protein 3                                     | SHC3                  | 0,77 |
| interleukin 16                                                                                    | IL16                  | 0,77 |
| fibroblast growth factor 21                                                                       | FGF21                 | 0,77 |
| mucolipin 2                                                                                       | MCOLN2                | 0,77 |
| prolyl 4-hydroxylase, alpha polypeptide II                                                        | P4HA2                 | 0,77 |
| WD repeat domain 46; microRNA 6873                                                                | WDR46; MIR6873        | 0,77 |
| zinc finger, X-linked, duplicated A                                                               | ZXDA                  | 0,77 |
| R3H domain and coiled-coil containing 1                                                           | R3HCC1                | 0,77 |
| Transcript Identified by AceView, Entrez Gene ID(s) 10777                                         | ARPP21                | 0,77 |
| DDRGK domain containing 1                                                                         | DDRGK1                | 0,77 |
| leucine rich adaptor protein 1                                                                    | LURAP1                | 0,77 |
| chaperonin containing TCP1, subunit 6B (zeta 2)                                                   | CCT6B                 | 0,77 |
| sialic acid binding Ig-like lectin 8                                                              | SIGLEC8               | 0,77 |
| autophagy related 4B, cysteine peptidase                                                          | ATG4B                 | 0,77 |
| synaptotagmin-like 4                                                                              | SYTL4                 | 0,77 |
| zinc finger and SCAN domain containing 5B                                                         | ZSCAN5B               | 0,77 |
| zinc finger, BED-type containing 9                                                                | ZBED9                 | 0,77 |
| GNAS complex locus                                                                                | GNAS                  | 0,77 |
| DEAH (Asp-Glu-Ala-Asp/His) box polypeptide 57                                                     | DHX57                 | 0,77 |
| transmembrane p24 trafficking protein family member 8                                             | TMED8                 | 0,77 |
| PDX1 C-terminal inhibiting factor 1                                                               | PCIF1                 | 0,77 |
| vomerol nasal 1 receptor 2                                                                        | VN1R2                 | 0,77 |
| galanin receptor 1                                                                                | GALR1                 | 0,77 |
| transformer 2 alpha homolog (Drosophila)                                                          | TRA2A                 | 0,77 |
| olfactory receptor, family 1, subfamily E, member 1                                               | OR1E1                 | 0,77 |
| chromosome 14 open reading frame 80                                                               | C14orf80              | 0,77 |
| LIM domain only 1 (rhombotin 1)                                                                   | LMO1                  | 0,77 |
| zinc finger, MYND-type containing 15                                                              | ZMYND15               | 0,77 |
| cut-like homeobox 2                                                                               | CUX2                  | 0,77 |
| neuropeptide S receptor 1                                                                         | NPSR1                 | 0,77 |
| zinc finger protein 546                                                                           | ZNF546                | 0,77 |
| lensin, lens protein with glutamine synthetase domain                                             | LGSN                  | 0,77 |
| exocyst complex component 3-like 4                                                                | EXOC3L4               | 0,77 |
| ATPase family, AAA domain containing 3C                                                           | ATAD3C                | 0,77 |
| archain 1                                                                                         | ARCN1                 | 0,77 |
| actin binding Rho activating protein                                                              | ABRA                  | 0,77 |
| ribophorin II                                                                                     | RPN2                  | 0,77 |
| transmembrane and tetratricopeptide repeat containing 3                                           | TMTC3                 | 0,77 |
| olfactory receptor, family 5, subfamily M, member 9                                               | OR5M9                 | 0,77 |

|                                                                                                                                                                                                                                                                                                                                                        |                    |      |
|--------------------------------------------------------------------------------------------------------------------------------------------------------------------------------------------------------------------------------------------------------------------------------------------------------------------------------------------------------|--------------------|------|
| olfactory receptor, family 56, subfamily A, member 4                                                                                                                                                                                                                                                                                                   | OR56A4             | 0,77 |
| MAP kinase interacting serine/threonine kinase 1                                                                                                                                                                                                                                                                                                       | MKNK1              | 0,77 |
| histone cluster 1, H4f                                                                                                                                                                                                                                                                                                                                 | HIST1H4F           | 0,77 |
| achaete-scute family bHLH transcription factor 4                                                                                                                                                                                                                                                                                                       | ASCL4              | 0,77 |
| ArfGAP with GTPase domain, ankyrin repeat and PH domain 6                                                                                                                                                                                                                                                                                              | AGAP6              | 0,77 |
| major facilitator superfamily domain containing 9                                                                                                                                                                                                                                                                                                      | MFSD9              | 0,77 |
| dynein, axonemal, heavy chain 8                                                                                                                                                                                                                                                                                                                        | DNAH8              | 0,77 |
| uroplakin 1A                                                                                                                                                                                                                                                                                                                                           | UPK1A              | 0,77 |
| zinc finger protein 200                                                                                                                                                                                                                                                                                                                                | ZNF200             | 0,77 |
| Jeck2013 ALT_ACCEPTOR, ALT_DONOR, coding, INTERNAL, intronic best transcript NM_016836                                                                                                                                                                                                                                                                 | RBMS1              | 0,77 |
| SAFB-like, transcription modulator                                                                                                                                                                                                                                                                                                                     | SLTM               | 0,77 |
| cystic fibrosis transmembrane conductance regulator                                                                                                                                                                                                                                                                                                    | CFTR               | 0,77 |
| ubiquitin specific peptidase 33                                                                                                                                                                                                                                                                                                                        | USP33              | 0,77 |
| TBC1 domain family, member 9B (with GRAM domain)                                                                                                                                                                                                                                                                                                       | TBC1D9B            | 0,77 |
| transmembrane protease, serine 6                                                                                                                                                                                                                                                                                                                       | TMPRSS6            | 0,77 |
| microtubule-associated protein 1 light chain 3 beta                                                                                                                                                                                                                                                                                                    | MAP1LC3B           | 0,77 |
| protein tyrosine phosphatase, non-receptor type 20                                                                                                                                                                                                                                                                                                     | PTPN20             | 0,77 |
| zinc finger protein 131                                                                                                                                                                                                                                                                                                                                | ZNF131             | 0,77 |
| THAP domain containing 9                                                                                                                                                                                                                                                                                                                               | THAP9              | 0,77 |
| complement component 1, r subcomponent                                                                                                                                                                                                                                                                                                                 | C1R                | 0,77 |
| adenosylhomocysteinase                                                                                                                                                                                                                                                                                                                                 | AHCY               | 0,77 |
| dehydrogenase/reductase (SDR family) member 4 like 1                                                                                                                                                                                                                                                                                                   | DHRS4L1            | 0,77 |
| cysteine rich with EGF-like domains 1                                                                                                                                                                                                                                                                                                                  | CRELD1             | 0,77 |
| Homo sapiens serine/threonine kinase 19 (STK19), transcript variant 1, mRNA.; Homo sapiens serine/threonine kinase 19 (STK19), transcript variant 2, mRNA.; Homo sapiens serine/threonine kinase 19 (STK19), transcript variant 3, non-coding RNA.; Homo sapiens serine/threonine kinase 19, mRNA (cDNA clone MGC:117388 IMAGE:5165123), complete cds. | STK19              | 0,77 |
| tRNA methyltransferase O                                                                                                                                                                                                                                                                                                                               | TRMO               | 0,77 |
| exosome component 6                                                                                                                                                                                                                                                                                                                                    | EXOSC6             | 0,77 |
| Transcript Identified by AceView, Entrez Gene ID(s) 55008; novel transcript                                                                                                                                                                                                                                                                            | RP11-10L7.1; HERC6 | 0,77 |
| RAB9B, member RAS oncogene family                                                                                                                                                                                                                                                                                                                      | RAB9B              | 0,77 |
| fibrinogen-like 2                                                                                                                                                                                                                                                                                                                                      | FGL2               | 0,77 |
| RNA binding motif protein 12; copine I                                                                                                                                                                                                                                                                                                                 | RBM12; CPNE1       | 0,77 |
| lysine (K)-specific methyltransferase 2D                                                                                                                                                                                                                                                                                                               | KMT2D              | 0,77 |
| acireductone dioxygenase 1                                                                                                                                                                                                                                                                                                                             | ADI1               | 0,77 |
| polysaccharide biosynthesis domain containing 1                                                                                                                                                                                                                                                                                                        | PBDC1              | 0,77 |
| cadherin 8, type 2                                                                                                                                                                                                                                                                                                                                     | CDH8               | 0,77 |
| tumor necrosis factor (ligand) superfamily, member 13                                                                                                                                                                                                                                                                                                  | TNFSF13            | 0,77 |
| KIF25 antisense RNA 1                                                                                                                                                                                                                                                                                                                                  | KIF25-AS1          | 0,77 |

|                                                                           |          |      |
|---------------------------------------------------------------------------|----------|------|
| olfactory receptor, family 4, subfamily C, member 16<br>(gene/pseudogene) | OR4C16   | 0,77 |
| chromosome 12 open reading frame 76                                       | C12orf76 | 0,77 |
| lymphocyte antigen 6 complex, locus E                                     | LY6E     | 0,77 |
| short chain dehydrogenase/reductase family 16C,<br>member 5               | SDR16C5  | 0,77 |
| zinc finger protein 354C                                                  | ZNF354C  | 0,77 |
| primary cilia formation                                                   | PIFO     | 0,77 |
| Transcript Identified by AceView, Entrez Gene ID(s) 4646                  | MYO6     | 0,77 |
| atonal bHLH transcription factor 7                                        | ATOH7    | 0,77 |
| spastin                                                                   | SPAST    | 0,77 |
| inner mitochondrial membrane peptidase subunit 2                          | IMMP2L   | 0,77 |
| macrophage erythroblast attacher                                          | MAEA     | 0,77 |
| phosphodiesterase 4A, cAMP-specific                                       | PDE4A    | 0,77 |
| transcription factor EB                                                   | TFEB     | 0,77 |
| par-3 family cell polarity regulator beta                                 | PARD3B   | 0,77 |
| C-type lectin domain family 12, member A                                  | CLEC12A  | 0,77 |
| EYA transcriptional coactivator and phosphatase 4                         | EYA4     | 0,77 |
| storkhead box 2                                                           | STOX2    | 0,77 |
| transient receptor potential cation channel, subfamily C,<br>member 7     | TRPC7    | 0,77 |
| hydroxymethylbilane synthase                                              | HMBS     | 0,77 |
| Rab acceptor 1 (prenylated)                                               | RABAC1   | 0,77 |
| serine/threonine kinase 25                                                | STK25    | 0,77 |
| nuclear export mediator factor                                            | NEMF     | 0,77 |
| PTPN13-like, Y-linked pseudogene 4                                        | PRYP4    | 0,77 |
| zinc finger, SWIM-type containing 2                                       | ZSWIM2   | 0,77 |
| leucine rich repeat containing 74B                                        | LRRC74B  | 0,77 |
| achaete-scute family bHLH transcription factor 3                          | ASCL3    | 0,77 |
| polycomb group ring finger 6                                              | PCGF6    | 0,77 |
| cysteine/tyrosine-rich 1                                                  | CYR1     | 0,77 |
| chromosome 1 open reading frame 50                                        | C1orf50  | 0,77 |
| G protein-coupled receptor 107                                            | GPR107   | 0,77 |
| peptidyl-tRNA hydrolase domain containing 1                               | PTRHD1   | 0,77 |
| polymerase (RNA) II (DNA directed) polypeptide I,<br>14.5kDa              | POLR2I   | 0,77 |
| protein phosphatase 1, regulatory subunit 27                              | PPP1R27  | 0,77 |
| tRNA methyltransferase 11 homolog                                         | TRMT11   | 0,77 |
| zinc finger protein 658B, pseudogene                                      | ZNF658B  | 0,77 |
| CAP-GLY domain containing linker protein 3                                | CLIP3    | 0,77 |
| castor zinc finger 1                                                      | CASZ1    | 0,77 |
| cytochrome P450, family 46, subfamily A, polypeptide 1                    | CYP46A1  | 0,77 |
| Transcript Identified by AceView, Entrez Gene ID(s) 2891                  | GRIA2    | 0,77 |

|                                                                                                                                 |                         |      |
|---------------------------------------------------------------------------------------------------------------------------------|-------------------------|------|
| Transcript Identified by AceView, Entrez Gene ID(s) 26275                                                                       | HIBCH                   | 0,77 |
| RPS10-NUDT3 readthrough                                                                                                         | RPS10-NUDT3             | 0,77 |
| hydroxyacid oxidase 2 (long chain)                                                                                              | HAO2                    | 0,77 |
| chromosome 19 open reading frame 18                                                                                             | C19orf18                | 0,77 |
| MCF.2 cell line derived transforming sequence like                                                                              | MCF2L                   | 0,77 |
| ribonuclease P/MRP 40kDa subunit                                                                                                | RPP40                   | 0,77 |
| peptidylprolyl isomerase A (cyclophilin A)-like 4F                                                                              | PPIAL4F                 | 0,77 |
| scaffolding protein involved in DNA repair                                                                                      | SPIDR                   | 0,77 |
| high density lipoprotein binding protein                                                                                        | HDLBP                   | 0,77 |
| pleckstrin homology domain containing, family H (with MyTH4 domain) member 3                                                    | PLEKHH3                 | 0,77 |
| late cornified envelope 3B                                                                                                      | LCE3B                   | 0,77 |
| family with sequence similarity 182, member B                                                                                   | FAM182B                 | 0,77 |
| chromobox homolog 1                                                                                                             | CBX1                    | 0,77 |
| elongation factor, RNA polymerase II, 2                                                                                         | ELL2                    | 0,77 |
| zinc finger protein 799                                                                                                         | ZNF799                  | 0,77 |
| lysosomal protein transmembrane 4 alpha                                                                                         | LAPTM4A                 | 0,77 |
| LIM and senescent cell antigen-like domains 3-like; LIM and senescent cell antigen-like domains 3                               | LIMS3L; LIMS3           | 0,77 |
| RCD1 required for cell differentiation1 homolog (S. pombe)                                                                      | RQCD1                   | 0,77 |
| chromosome 6 open reading frame 201                                                                                             | C6orf201                | 0,77 |
| ankyrin repeat and sterile alpha motif domain containing 6                                                                      | ANKS6                   | 0,77 |
| glycine C-acetyltransferase                                                                                                     | GCAT                    | 0,77 |
| Transcript Identified by AceView, Entrez Gene ID(s) 57504                                                                       | MTA3                    | 0,77 |
| immunoglobulin-like domain containing receptor 1                                                                                | ILDR1                   | 0,77 |
| ubiquitin associated protein 1 like                                                                                             | UBAP1L                  | 0,77 |
| heterogeneous nuclear ribonucleoprotein C-like 1                                                                                | HNRNPCL1                | 0,77 |
| WD repeat domain 45B                                                                                                            | WDR45B                  | 0,77 |
| mitochondrial ribosomal protein L22                                                                                             | MRPL22                  | 0,77 |
| heparan sulfate (glucosamine) 3-O-sulfotransferase 1                                                                            | HS3ST1                  | 0,77 |
| leucine rich repeat containing 36                                                                                               | LRRC36                  | 0,77 |
| ribosomal protein L3; small nucleolar RNA, C/D box 83B; small nucleolar RNA, C/D box 43                                         | RPL3; SNORD83B; SNORD43 | 0,77 |
| small integral membrane protein 11A                                                                                             | SMIM11A                 | 0,77 |
| latexin                                                                                                                         | LXN                     | 0,77 |
| Transcript Identified by AceView; Zhang2013<br>ALT_ACCEPTOR, ALT_DONOR, coding, INTERNAL, intronic<br>best transcript NM_006548 | dorsnarby;<br>IGF2BP2   | 0,77 |
| S-antigen; retina and pineal gland (arrestin)                                                                                   | SAG                     | 0,77 |
| cytoplasmic FMR1 interacting protein 2                                                                                          | CYFIP2                  | 0,77 |

|                                                                                          |              |      |
|------------------------------------------------------------------------------------------|--------------|------|
| unc-119 lipid binding chaperone                                                          | UNC119       | 0,77 |
| UFM1-specific peptidase 1 (inactive)                                                     | UFSP1        | 0,77 |
| Transcript Identified by AceView, Entrez Gene ID(s) 10896                                | OCLM         | 0,77 |
| protein kinase, cAMP-dependent, regulatory, type I, beta                                 | PRKAR1B      | 0,77 |
| synaptotagmin XVII                                                                       | SYT17        | 0,77 |
| phosphatase and tensin homolog                                                           | PTEN         | 0,77 |
| apolipoprotein B receptor                                                                | APOBR        | 0,77 |
| nicalin                                                                                  | NCLN         | 0,77 |
| catenin (cadherin-associated protein), alpha 2                                           | CTNNA2       | 0,77 |
| disco-interacting protein 2 homolog C                                                    | DIP2C        | 0,77 |
| RNA binding motif protein 23                                                             | RBM23        | 0,77 |
| SAP30-like                                                                               | SAP30L       | 0,77 |
| zinc finger protein 496                                                                  | ZNF496       | 0,77 |
| protein O-linked mannose N-acetylglucosaminyltransferase 1 (beta 1,2-)                   | POMGNT1      | 0,77 |
| EPS8-like 2                                                                              | EPS8L2       | 0,77 |
| chromosome 1 open reading frame 216                                                      | C1orf216     | 0,77 |
| interleukin 1 receptor accessory protein                                                 | IL1RAP       | 0,77 |
| peroxisomal biogenesis factor 6                                                          | PEX6         | 0,77 |
| guanine nucleotide binding protein (G protein), alpha 14                                 | GNA14        | 0,77 |
| calsyntenin 3                                                                            | CLSTN3       | 0,77 |
| DEAD (Asp-Glu-Ala-Asp) box helicase 1                                                    | DDX1         | 0,77 |
| N(alpha)-acetyltransferase 38, NatC auxiliary subunit                                    | NAA38        | 0,76 |
| guanine nucleotide binding protein (G protein), gamma transducing activity polypeptide 1 | GNGT1        | 0,76 |
| DnaJ (Hsp40) homolog, subfamily C, member 6                                              | DNAJC6       | 0,76 |
| Memczak2013 ANTISENSE, CDS, coding, INTERNAL best transcript NM_012433                   | SF3B1        | 0,76 |
| nerve growth factor (beta polypeptide)                                                   | NGF          | 0,76 |
| trafficking protein particle complex 12                                                  | TRAPPC12     | 0,76 |
| epidermal growth factor                                                                  | EGF          | 0,76 |
| PRAME family member 10                                                                   | PRAMEF10     | 0,76 |
| signal recognition particle 9kDa                                                         | SRP9         | 0,76 |
| NUT family member 2D                                                                     | NUTM2D       | 0,76 |
| empty spiracles homeobox 1                                                               | EMX1         | 0,76 |
| translocation associated membrane protein 1-like 1                                       | TRAM1L1      | 0,76 |
| pentatricopeptide repeat domain 3                                                        | PTCD3        | 0,76 |
| amylase, alpha 1B (salivary); amylase, alpha 1A (salivary)                               | AMY1B; AMY1A | 0,76 |
| alpha-2-macroglobulin-like 1                                                             | A2ML1        | 0,76 |
| family with sequence similarity 98, member C                                             | FAM98C       | 0,76 |
| potassium channel, inwardly rectifying subfamily J, member 13                            | KCNJ13       | 0,76 |

|                                                                                           |                 |      |
|-------------------------------------------------------------------------------------------|-----------------|------|
| ZFP1 zinc finger protein                                                                  | ZFP1            | 0,76 |
| cytoskeleton associated protein 5; small nucleolar RNA, C/D box 67                        | CKAP5; SNORD67  | 0,76 |
| 4-hydroxy-2-oxoglutarate aldolase 1                                                       | HOGA1           | 0,76 |
| ring finger protein 169                                                                   | RNF169          | 0,76 |
| EPH receptor A4                                                                           | EPHA4           | 0,76 |
| aldehyde dehydrogenase 1 family, member L1                                                | ALDH1L1         | 0,76 |
| PRP40 pre-mRNA processing factor 40 homolog A                                             | PRPF40A         | 0,76 |
| Cbl proto-oncogene C, E3 ubiquitin protein ligase                                         | CBLC            | 0,76 |
| cripto, FRL-1, cryptic family 1B; cripto, FRL-1, cryptic family 1                         | CFC1B; CFC1     | 0,76 |
| olfactory receptor, family 2, subfamily T, member 33                                      | OR2T33          | 0,76 |
| Salzman2013 ANNOTATED, CDS, coding, INTERNAL, OVCODE, OVEXON best transcript NM_001201380 | CNTNAP3B        | 0,76 |
| chromosome 16 open reading frame 52                                                       | C16orf52        | 0,76 |
| zinc finger protein 77                                                                    | ZNF77           | 0,76 |
| proteasome subunit alpha 2                                                                | PSMA2           | 0,76 |
| attractin-like 1                                                                          | ATRNL1          | 0,76 |
| ATPase, class VI, type 11C                                                                | ATP11C          | 0,76 |
| transferrin receptor                                                                      | TFRC            | 0,76 |
| sodium channel, voltage gated, type III alpha subunit                                     | SCN3A           | 0,76 |
| ArfGAP with RhoGAP domain, ankyrin repeat and PH domain 1                                 | ARAP1           | 0,76 |
| structural maintenance of chromosomes 5                                                   | SMC5            | 0,76 |
| calmodulin-lysine N-methyltransferase                                                     | CAMKMT          | 0,76 |
| hydroxymethylbilane synthase                                                              | HMBS            | 0,76 |
| leucine rich repeat containing 58                                                         | LRRC58          | 0,76 |
| hair growth associated                                                                    | HR              | 0,76 |
| purinergic receptor P2Y, G-protein coupled, 2                                             | P2RY2           | 0,76 |
| WD repeat domain 70                                                                       | WDR70           | 0,76 |
| aspartyl-tRNA synthetase                                                                  | DARS            | 0,76 |
| chromobox homolog 5; microRNA 3198-2                                                      | CBX5; MIR3198-2 | 0,76 |
| thioredoxin reductase 3                                                                   | TXNRD3          | 0,76 |
| non imprinted in Prader-Willi/Angelman syndrome 2                                         | NIPA2           | 0,76 |
| RFNG O-fucosylpeptide 3-beta-N-acetylglucosaminyltransferase                              | RFNG            | 0,76 |
| tectonic family member 2                                                                  | TCTN2           | 0,76 |
| ubiquitin-like modifier activating enzyme 3                                               | UBA3            | 0,76 |
| leucine rich repeat containing 71                                                         | LRRC71          | 0,76 |
| phosphoribosyl pyrophosphate amidotransferase                                             | PPAT            | 0,76 |
| Wilms tumor 1 associated protein                                                          | WTAP            | 0,76 |
| male-specific lethal 1 homolog (Drosophila)                                               | MSL1            | 0,76 |
| potassium channel tetramerization domain containing 7                                     | KCTD7           | 0,76 |
| Jeck2013 ALT_ACCEPTOR, ALT_DONOR, coding, INTERNAL, intronic best transcript NM_004529    | MLLT3           | 0,76 |

|                                                                                     |            |      |
|-------------------------------------------------------------------------------------|------------|------|
| nanos homolog 1 (Drosophila)                                                        | NANOS1     | 0,76 |
| PAX3 and PAX7 binding protein 1                                                     | PAXBP1     | 0,76 |
| RASSF1 antisense RNA 1                                                              | RASSF1-AS1 | 0,76 |
| growth factor independent 1 transcription repressor                                 | GFI1       | 0,76 |
| defensin, beta 110                                                                  | DEFB110    | 0,76 |
| RAB1A, member RAS oncogene family                                                   | RAB1A      | 0,76 |
| chromosome 2 open reading frame 27A                                                 | C2orf27A   | 0,76 |
| retinitis pigmentosa 1 (autosomal dominant)                                         | RP1        | 0,76 |
| purinergic receptor P2X, ligand gated ion channel, 3                                | P2RX3      | 0,76 |
| coiled-coil domain containing 177                                                   | CCDC177    | 0,76 |
| nephronophthisis 3 (adolescent)                                                     | NPHP3      | 0,76 |
| cadherin 3, type 1, P-cadherin (placental)                                          | CDH3       | 0,76 |
| oligodendrocyte transcription factor 3                                              | OLIG3      | 0,76 |
| vanin 3                                                                             | VNN3       | 0,76 |
| solute carrier family 22, member 17                                                 | SLC22A17   | 0,76 |
| proteasome subunit beta 5                                                           | PSMB5      | 0,76 |
| protocadherin beta 9                                                                | PCDHB9     | 0,76 |
| idnK, gluconokinase homolog (E. coli)                                               | IDNK       | 0,76 |
| B-Raf proto-oncogene, serine/threonine kinase                                       | BRAF       | 0,76 |
| leucine twenty homeobox                                                             | LEUTX      | 0,76 |
| RAS-like, family 10, member B                                                       | RASL10B    | 0,76 |
| VMA21 vacuolar H <sup>+</sup> -ATPase homolog (S. cerevisiae)                       | VMA21      | 0,76 |
| zinc finger, MYM-type 2                                                             | ZMYM2      | 0,76 |
| zinc finger protein 302                                                             | ZNF302     | 0,76 |
| troponin I type 1 (skeletal, slow)                                                  | TNNI1      | 0,76 |
| chemokine (C-X3-C motif) receptor 1                                                 | CX3CR1     | 0,76 |
| Jeck2013 ANTISENSE, CDS, coding, INTERNAL, OVCODE, OVEXON best transcript NM_130803 | MEN1       | 0,76 |
| angiotensin II receptor, type 2                                                     | AGTR2      | 0,76 |
| protein tyrosine kinase 2                                                           | PTK2       | 0,76 |
| rhophilin, Rho GTPase binding protein 2                                             | RHPN2      | 0,76 |
| zinc metalloproteinase STE24                                                        | ZMPSTE24   | 0,76 |
| histidine triad nucleotide binding protein 1                                        | HINT1      | 0,76 |
| limb and CNS expressed 1 like                                                       | LIX1L      | 0,76 |
| interferon, alpha 2                                                                 | IFNA2      | 0,76 |
| GTPase, IMAP family member 2                                                        | GIMAP2     | 0,76 |
| fibronectin type III domain containing 1                                            | FNDC1      | 0,76 |
| dynein, cytoplasmic 2, light intermediate chain 1                                   | DYNC2LI1   | 0,76 |
| solute carrier organic anion transporter family, member 4A1                         | SLCO4A1    | 0,76 |
| eukaryotic translation initiation factor 3, subunit F                               | EIF3F      | 0,76 |
| ribosomal protein L14                                                               | RPL14      | 0,76 |
| short stature homeobox                                                              | SHOX       | 0,76 |

|                                                                                                                                                              |                                              |      |
|--------------------------------------------------------------------------------------------------------------------------------------------------------------|----------------------------------------------|------|
| Transcript Identified by AceView; Jeck2013<br>ALT_ACCEPTOR, ALT_DONOR, coding, INTERNAL, intronic<br>best transcript NM_001003679; putative novel transcript | boyboy; RP4-<br>630A11.3; LEPR               | 0,76 |
| neuropeptide S                                                                                                                                               | NPS                                          | 0,76 |
| ribosomal protein S29                                                                                                                                        | RPS29                                        | 0,76 |
| family with sequence similarity 171, member A2                                                                                                               | FAM171A2                                     | 0,76 |
| sterol O-acyltransferase 1                                                                                                                                   | SOAT1                                        | 0,76 |
| ribosomal protein L23a; small nucleolar RNA, C/D box 4B;<br>small nucleolar RNA, C/D box 42B; small nucleolar RNA,<br>C/D box 42A                            | RPL23A;<br>SNORD4B;<br>SNORD42B;<br>SNORD42A | 0,76 |
| polyglutamine binding protein 1                                                                                                                              | PQBP1                                        | 0,76 |
| nicotinamide nucleotide adenylyltransferase 1                                                                                                                | NMNAT1                                       | 0,76 |
| RFPL3 antisense                                                                                                                                              | RFPL3S                                       | 0,76 |
| transmembrane protein 260                                                                                                                                    | TMEM260                                      | 0,76 |
| Transcript Identified by AceView, Entrez Gene ID(s) 55604                                                                                                    | LRRC16A                                      | 0,76 |
| StAR-related lipid transfer domain containing 7                                                                                                              | STARD7                                       | 0,76 |
| ADAM metalloproteinase with thrombospondin type 1<br>motif 8                                                                                                 | ADAMTS8                                      | 0,76 |
| essential meiotic structure-specific endonuclease subunit<br>2                                                                                               | EME2                                         | 0,76 |
| lysine (K)-specific demethylase 8                                                                                                                            | KDM8                                         | 0,76 |
| keratin associated protein 6-3                                                                                                                               | KRTAP6-3                                     | 0,76 |
|                                                                                                                                                              | LRIG1                                        | 0,76 |
| hydroxymethylbilane synthase                                                                                                                                 | HMBS                                         | 0,76 |
| Transcript Identified by AceView, Entrez Gene ID(s) 23126                                                                                                    | POGZ                                         | 0,76 |
| Jeck2013 ANTISENSE, coding, INTERNAL, intronic best<br>transcript NM_014191                                                                                  | SCN8A                                        | 0,76 |
| long intergenic non-protein coding RNA 473                                                                                                                   | LINC00473                                    | 0,76 |
| CD5 molecule-like                                                                                                                                            | CD5L                                         | 0,76 |
| REX4 homolog, 3-5 exonuclease                                                                                                                                | REXO4                                        | 0,76 |
| olfactory receptor, family 4, subfamily S, member 1                                                                                                          | OR4S1                                        | 0,76 |
| mitogen-activated protein kinase 14                                                                                                                          | MAPK14                                       | 0,76 |
| NLR family, pyrin domain containing 3                                                                                                                        | NLRP3                                        | 0,76 |
| SET domain, bifurcated 1                                                                                                                                     | SETDB1                                       | 0,76 |
| transmembrane protein 65                                                                                                                                     | TMEM65                                       | 0,76 |
| MGAT4 family, member E, pseudogene                                                                                                                           | MGAT4EP                                      | 0,76 |
| jagunal homolog 1                                                                                                                                            | JAGN1                                        | 0,76 |
| taste receptor, type 2, member 5                                                                                                                             | TAS2R5                                       | 0,76 |
| cytochrome b5 reductase 3                                                                                                                                    | CYB5R3                                       | 0,76 |
| myelin regulatory factor                                                                                                                                     | MYRF                                         | 0,76 |
| sterile alpha motif domain containing 1                                                                                                                      | SAMD1                                        | 0,76 |



|                                                                                                      |                                |      |
|------------------------------------------------------------------------------------------------------|--------------------------------|------|
| pericentrin                                                                                          | PCNT                           | 0,76 |
| TBC1 domain family, member 3K                                                                        | TBC1D3K                        | 0,76 |
| ribosomal protein S6 kinase, 70kDa, polypeptide 2                                                    | RPS6KB2                        | 0,76 |
| LYR motif containing 1                                                                               | LYRM1                          | 0,76 |
| TraB domain containing                                                                               | TRABD                          | 0,76 |
| leucine-rich repeat LGI family, member 4                                                             | LGI4                           | 0,76 |
| programmed cell death 2                                                                              | PDCD2                          | 0,76 |
| proline rich 36                                                                                      | PRR36                          | 0,76 |
| BTB (POZ) domain containing 3                                                                        | BTBD3                          | 0,76 |
| vitamin K epoxide reductase complex subunit 1                                                        | VKORC1                         | 0,76 |
| poly(A) binding protein interacting protein 1                                                        | PAIP1                          | 0,76 |
| cysteine-rich secretory protein LCCL domain containing 1                                             | CRISPLD1                       | 0,76 |
| nuclear receptor subfamily 1, group I, member 3                                                      | NR1I3                          | 0,76 |
| transmembrane protein 109                                                                            | TMEM109                        | 0,76 |
| Fanconi anemia complementation group C                                                               | FANCC                          | 0,76 |
| eukaryotic translation initiation factor 3, subunit E                                                | EIF3E                          | 0,76 |
| ribosomal protein L9 pseudogene 7                                                                    | RPL9P7                         | 0,76 |
| sorting nexin 33                                                                                     | SNX33                          | 0,76 |
| BCL2/adenovirus E1B 19kDa interacting protein 1                                                      | BNIP1                          | 0,76 |
| methylenetetrahydrofolate reductase (NAD(P)H)                                                        | MTHFR                          | 0,76 |
| ankyrin repeat domain 9                                                                              | ANKRD9                         | 0,76 |
| Treacher Collins-Franceschetti syndrome 1                                                            | TCOF1                          | 0,76 |
| KDEL (Lys-Asp-Glu-Leu) endoplasmic reticulum protein retention receptor 1                            | KDELR1                         | 0,76 |
| zinc finger protein 546                                                                              | ZNF546                         | 0,76 |
| leukotriene A4 hydrolase                                                                             | LTA4H                          | 0,76 |
| oculomedin                                                                                           | OCLM                           | 0,76 |
| solute carrier family 35, member F5                                                                  | SLC35F5                        | 0,76 |
| phosphoribosylaminoimidazole carboxylase, phosphoribosylaminoimidazole succinocarboxamide synthetase | PAICS                          | 0,76 |
| uncharacterized LOC101928694; novel transcript, antisense to LIPC                                    | LOC101928694;<br>RP11-355N15.1 | 0,76 |
| olfactory receptor, family 4, subfamily C, member 12                                                 | OR4C12                         | 0,76 |
| C2 calcium-dependent domain containing 2                                                             | C2CD2                          | 0,76 |
| diphthamide biosynthesis 5                                                                           | DPH5                           | 0,76 |
| HECT and RLD domain containing E3 ubiquitin protein ligase family member 6                           | HERC6                          | 0,76 |
| BRCA1/BRCA2-containing complex subunit 3                                                             | BRCC3                          | 0,76 |
| NADH dehydrogenase (ubiquinone) 1 alpha subcomplex, 10, 42kDa                                        | NDUFA10                        | 0,76 |
| Gilles de la Tourette syndrome chromosome region, candidate 1 (non-protein coding)                   | GTSCR1                         | 0,76 |
| KIAA0368                                                                                             | KIAA0368                       | 0,76 |

|                                                                                                           |                     |      |
|-----------------------------------------------------------------------------------------------------------|---------------------|------|
| olfactory receptor, family 2, subfamily G, member 3                                                       | OR2G3               | 0,76 |
| MOB kinase activator 1A                                                                                   | MOB1A               | 0,76 |
| leukocyte immunoglobulin-like receptor, subfamily A (with TM domain), member 2                            | LILRA2              | 0,76 |
| serine/threonine kinase 32B                                                                               | STK32B              | 0,76 |
| phosphogluconate dehydrogenase                                                                            | PGD                 | 0,76 |
| histone cluster 1, H2ba                                                                                   | HIST1H2BA           | 0,76 |
| integrin alpha 2b                                                                                         | ITGA2B              | 0,76 |
| cytochrome P450, family 26, subfamily A, polypeptide 1                                                    | CYP26A1             | 0,76 |
| CD300 molecule-like family member d                                                                       | CD300LD             | 0,75 |
| Memczak2013 ALT_ACCEPTOR, ALT_DONOR, coding, INTERNAL, intronic best transcript NM_212471                 | PRKAR1A             | 0,75 |
| hephaestin-like 1                                                                                         | HEPHL1              | 0,75 |
| SIL1 nucleotide exchange factor                                                                           | SIL1                | 0,75 |
| wntless Wnt ligand secretion mediator                                                                     | WLS                 | 0,75 |
| binder of sperm protein homolog 1                                                                         | BSPH1               | 0,75 |
| F-box protein 8                                                                                           | FBXO8               | 0,75 |
| multiple C2 domains, transmembrane 2                                                                      | MCTP2               | 0,75 |
| surfeit 4                                                                                                 | SURF4               | 0,75 |
| chromosome 20 open reading frame 196                                                                      | C20orf196           | 0,75 |
| Memczak2013 ANTISENSE, coding, INTERNAL, UTR5 best transcript NM_003494; Transcript Identified by AceView | DYSF; kydor         | 0,75 |
| lectin, galactoside-binding, soluble, 9C; lectin, galactoside-binding, soluble, 9B                        | LGALS9C;<br>LGALS9B | 0,75 |
| microtubule-associated protein 9                                                                          | MAP9                | 0,75 |
| serine/threonine kinase 32A                                                                               | STK32A              | 0,75 |
| zinc finger protein 213                                                                                   | ZNF213              | 0,75 |
| Transcript Identified by AceView, Entrez Gene ID(s) 10082                                                 | GPC6                | 0,75 |
| NK2 homeobox 1                                                                                            | NKX2-1              | 0,75 |
| homeodomain interacting protein kinase 3                                                                  | HIPK3               | 0,75 |
| hydroxymethylbilane synthase                                                                              | HMBS                | 0,75 |
| anoctamin 7                                                                                               | ANO7                | 0,75 |
| calcium and integrin binding 1 (calmyrin)                                                                 | CIB1                | 0,75 |
| kelch-like family member 1                                                                                | KLHL1               | 0,75 |
| bromo adjacent homology domain containing 1                                                               | BAHD1               | 0,75 |
| GPALPP motifs containing 1                                                                                | GPALPP1             | 0,75 |
| RAN binding protein 3                                                                                     | RANBP3              | 0,75 |
| TEK tyrosine kinase, endothelial                                                                          | TEK                 | 0,75 |
| abhydrolase domain containing 3                                                                           | ABHD3               | 0,75 |
| transmembrane protein 178A                                                                                | TMEM178A            | 0,75 |
| heterogeneous nuclear ribonucleoprotein H2 (H)                                                            | HNRNPH2             | 0,75 |
| acyl-CoA dehydrogenase, C-2 to C-3 short chain                                                            | ACADS               | 0,75 |
| WAP four-disulfide core domain 5                                                                          | WFDC5               | 0,75 |

|                                                                                                                                                    |                                 |      |
|----------------------------------------------------------------------------------------------------------------------------------------------------|---------------------------------|------|
| Memczak2013 ANTISENSE, coding, INTERNAL, intronic<br>best transcript NM_001242765                                                                  | DLGAP1                          | 0,75 |
| exocyst complex component 6                                                                                                                        | EXOC6                           | 0,75 |
| cation channel, sperm associated 3                                                                                                                 | CATSPER3                        | 0,75 |
| peroxisomal biogenesis factor 5                                                                                                                    | PEX5                            | 0,75 |
| thrombospondin-type laminin G domain and EAR repeats                                                                                               | TSPEAR                          | 0,75 |
| ribosomal protein S27                                                                                                                              | RPS27                           | 0,75 |
| syntaxin 5                                                                                                                                         | STX5                            | 0,75 |
| G protein-coupled receptor, class C, group 5, member B                                                                                             | GPRC5B                          | 0,75 |
| myeloid/lymphoid or mixed-lineage leukemia;<br>translocated to, 10                                                                                 | MLLT10                          | 0,75 |
| ribosomal protein S23                                                                                                                              | RPS23                           | 0,75 |
| zinc finger and SCAN domain containing 32                                                                                                          | ZSCAN32                         | 0,75 |
| ADP-ribosylation factor like GTPase 6 interacting protein<br>4                                                                                     | ARL6IP4                         | 0,75 |
| histone cluster 3, H3                                                                                                                              | HIST3H3                         | 0,75 |
| D4, zinc and double PHD fingers, family 3                                                                                                          | DPF3                            | 0,75 |
| pecanex homolog (Drosophila)                                                                                                                       | PCNX                            | 0,75 |
| forkhead box D4-like 4                                                                                                                             | FOXD4L4                         | 0,75 |
| leucine rich repeat transmembrane neuronal 4                                                                                                       | LRRTM4                          | 0,75 |
| unc-13 homolog B (C. elegans)                                                                                                                      | UNC13B                          | 0,75 |
| ubiquitin conjugating enzyme E2N-like<br>(gene/pseudogene)                                                                                         | UBE2NL                          | 0,75 |
| glucose-6-phosphate isomerase                                                                                                                      | GPI                             | 0,75 |
| activating transcription factor 7 interacting protein                                                                                              | ATF7IP                          | 0,75 |
| guanine nucleotide binding protein (G protein), beta<br>polypeptide 2-like 1; small nucleolar RNA, C/D box 95;<br>small nucleolar RNA, C/D box 96A | GNB2L1;<br>SNORD95;<br>SNORD96A | 0,75 |
| gap junction protein delta 3                                                                                                                       | GJD3                            | 0,75 |
| intraflagellar transport 27                                                                                                                        | IFT27                           | 0,75 |
| kinesin family member 15                                                                                                                           | KIF15                           | 0,75 |
| neuro-oncological ventral antigen 1                                                                                                                | NOVA1                           | 0,75 |
| fukutin                                                                                                                                            | FKTN                            | 0,75 |
| heparan-alpha-glucosaminide N-acetyltransferase                                                                                                    | HGSNAT                          | 0,75 |
| adrenoceptor alpha 1B                                                                                                                              | ADRA1B                          | 0,75 |
| tectonin beta-propeller repeat containing 2                                                                                                        | TECPR2                          | 0,75 |
| nicotinamide riboside kinase 1                                                                                                                     | NMRK1                           | 0,75 |
| N(alpha)-acetyltransferase 40, NatD catalytic subunit                                                                                              | NAA40                           | 0,75 |
| platelet/endothelial cell adhesion molecule 1                                                                                                      | PECAM1                          | 0,75 |
| RUN and SH3 domain containing 1                                                                                                                    | RUSC1                           | 0,75 |
| zinc finger protein 500                                                                                                                            | ZNF500                          | 0,75 |
| NFKB repressing factor                                                                                                                             | NKRF                            | 0,75 |
| DCN1, defective in cullin neddylation 1, domain<br>containing 2                                                                                    | DCUN1D2                         | 0,75 |

|                                                                                                                                                              |                                                          |      |
|--------------------------------------------------------------------------------------------------------------------------------------------------------------|----------------------------------------------------------|------|
| mitochondrial fission process 1                                                                                                                              | MTFP1                                                    | 0,75 |
| ATP binding cassette subfamily A member 13                                                                                                                   | ABCA13                                                   | 0,75 |
| ribosomal protein L13a; small nucleolar RNA, C/D box 35A; small nucleolar RNA, C/D box 34; small nucleolar RNA, C/D box 33; small nucleolar RNA, C/D box 32A | RPL13A;<br>SNORD35A;<br>SNORD34;<br>SNORD33;<br>SNORD32A | 0,75 |
| poly(A) binding protein, cytoplasmic 4 (inducible form)                                                                                                      | PABPC4                                                   | 0,75 |
| F-box and WD repeat domain containing 10                                                                                                                     | FBXW10                                                   | 0,75 |
| ribosomal protein L27                                                                                                                                        | RPL27                                                    | 0,75 |
| olfactory receptor, family 2, subfamily M, member 3                                                                                                          | OR2M3                                                    | 0,75 |
| fumarylacetoacetate hydrolase domain containing 1                                                                                                            | FAHD1                                                    | 0,75 |
| apelin receptor                                                                                                                                              | APLNR                                                    | 0,75 |
| EXOC3 antisense RNA 1                                                                                                                                        | EXOC3-AS1                                                | 0,75 |
| lipopolysaccharide-induced TNF factor                                                                                                                        | LITAF                                                    | 0,75 |
| family with sequence similarity 193, member A                                                                                                                | FAM193A                                                  | 0,75 |
| serine/threonine kinase 35                                                                                                                                   | STK35                                                    | 0,75 |
| ribosomal RNA processing 12 homolog                                                                                                                          | RRP12                                                    | 0,75 |
| Transcript Identified by AceView, Entrez Gene ID(s) 23126                                                                                                    | POGZ                                                     | 0,75 |
| microtubule-associated protein, RP/EB family, member 2                                                                                                       | MAPRE2                                                   | 0,75 |
| ubiquitin-conjugating enzyme E2C                                                                                                                             | UBE2C                                                    | 0,75 |
| coiled-coil-helix-coiled-coil-helix domain containing 7                                                                                                      | CHCHD7                                                   | 0,75 |
| ADAM metallopeptidase with thrombospondin type 1 motif 13                                                                                                    | ADAMTS13                                                 | 0,75 |
| cullin-associated and neddylation-dissociated 2 (putative)                                                                                                   | CAND2                                                    | 0,75 |
| family with sequence similarity 102, member B                                                                                                                | FAM102B                                                  | 0,75 |
| mitochondrial ribosomal protein S36                                                                                                                          | MRPS36                                                   | 0,75 |
| Memczak2013 ANTISENSE, CDS, coding, INTERNAL best transcript NM_015070                                                                                       | ZC3H13                                                   | 0,75 |
| Memczak2013 ANTISENSE, coding, INTERNAL, intronic best transcript NM_001165899                                                                               | PDE4D                                                    | 0,75 |
| chemokine (C-X-C motif) receptor 1                                                                                                                           | CXCR1                                                    | 0,75 |
| Mov10 RISC complex RNA helicase                                                                                                                              | MOV10                                                    | 0,75 |
| Rho guanine nucleotide exchange factor 38                                                                                                                    | ARHGEF38                                                 | 0,75 |
| cystin 1                                                                                                                                                     | CYS1                                                     | 0,75 |
| protocadherin beta 16                                                                                                                                        | PCDHB16                                                  | 0,75 |
| SSSCA1 antisense RNA 1 (head to head)                                                                                                                        | SSSCA1-AS1                                               | 0,75 |
| tubulin, gamma complex associated protein 4                                                                                                                  | TUBGCP4                                                  | 0,75 |
| eva-1 homolog A (C. elegans)                                                                                                                                 | EVA1A                                                    | 0,75 |
| ring finger protein 26                                                                                                                                       | RNF26                                                    | 0,75 |
| myocardin                                                                                                                                                    | MYOCD                                                    | 0,75 |
| zinc finger, MYM-type 1                                                                                                                                      | ZMYM1                                                    | 0,75 |

|                                                                                           |           |      |
|-------------------------------------------------------------------------------------------|-----------|------|
| BCL2-associated X protein                                                                 | BAX       | 0,75 |
| mediator complex subunit 18                                                               | MED18     | 0,75 |
| zinc finger protein 484                                                                   | ZNF484    | 0,75 |
| acid sensing ion channel 1                                                                | ASIC1     | 0,75 |
| stromal antigen 3-like 2 (pseudogene)                                                     | STAG3L2   | 0,75 |
| ubiquitin protein ligase E3D                                                              | UBE3D     | 0,75 |
| SH3 domain containing 19                                                                  | SH3D19    | 0,75 |
| myelin protein zero-like 1                                                                | MPZL1     | 0,75 |
| integrin-binding sialoprotein                                                             | IBSP      | 0,75 |
| RNA binding motif protein 44                                                              | RBM44     | 0,75 |
| matrix metalloproteinase 9                                                                | MMP9      | 0,75 |
| Transcript Identified by AceView, Entrez Gene ID(s) 10777                                 | ARPP21    | 0,75 |
| NADH dehydrogenase (ubiquinone) 1 beta subcomplex, 1, 7kDa                                | NDUFB1    | 0,75 |
| RASD family, member 2                                                                     | RASD2     | 0,75 |
| structure specific recognition protein 1                                                  | SSRP1     | 0,75 |
| methionyl aminopeptidase 2                                                                | METAP2    | 0,75 |
| Memczak2013 ALT_ACCEPTOR, ALT_DONOR, coding, INTERNAL, intronic best transcript NM_022492 | TTC31     | 0,75 |
| Transcript Identified by AceView, Entrez Gene ID(s) 5019                                  | OXCT1     | 0,75 |
| ribosomal protein L6                                                                      | RPL6      | 0,75 |
| Down syndrome critical region 8                                                           | DSCR8     | 0,75 |
| emopamil binding protein-like                                                             | EBPL      | 0,75 |
| KIAA1191                                                                                  | KIAA1191  | 0,75 |
| X-linked Kx blood group                                                                   | XK        | 0,75 |
| Transcript Identified by AceView, Entrez Gene ID(s) 10450                                 | PPIE      | 0,75 |
| ring finger protein 5, E3 ubiquitin protein ligase                                        | RNF5      | 0,75 |
| granzyme K                                                                                | GZMK      | 0,75 |
| PACRG antisense RNA 3                                                                     | PACRG-AS3 | 0,75 |
| fragile X mental retardation 1                                                            | FMR1      | 0,75 |
| transmembrane protein 204                                                                 | TMEM204   | 0,75 |
| spermatogenesis associated 5                                                              | SPATA5    | 0,75 |
| protamine 2                                                                               | PRM2      | 0,75 |
| forkhead box G1                                                                           | FOXG1     | 0,75 |
| phospholipase A2, group XVI                                                               | PLA2G16   | 0,75 |
| C1q and tumor necrosis factor related protein 3                                           | C1QTNF3   | 0,75 |
| eukaryotic translation elongation factor 1 alpha 1                                        | EEF1A1    | 0,75 |
| non-SMC condensin II complex subunit H2                                                   | NCAPH2    | 0,75 |
| Transcript Identified by AceView, Entrez Gene ID(s) 404636                                | FAM45A    | 0,75 |
| synaptotagmin XV                                                                          | SYT15     | 0,75 |
| proteasome subunit beta 6                                                                 | PSMB6     | 0,75 |

|                                                                                               |                |      |
|-----------------------------------------------------------------------------------------------|----------------|------|
| family with sequence similarity 161, member B                                                 | FAM161B        | 0,75 |
| mitochondrial ribosomal protein L4                                                            | MRPL4          | 0,75 |
| fructosamine 3 kinase                                                                         | FN3K           | 0,75 |
| ring finger protein 24                                                                        | RNF24          | 0,75 |
| butyrophilin-like 10                                                                          | BTNL10         | 0,75 |
| cyclin J                                                                                      | CCNJ           | 0,75 |
| X-linked Kx blood group related 6                                                             | XKR6           | 0,75 |
| adaptor protein, phosphotyrosine interaction, PH domain and leucine zipper containing 2       | APPL2          | 0,75 |
| Jeck2013 ANTISENSE, CDS, coding, INTERNAL, intronic, OVCODE, OVEXON best transcript NM_003131 | SRF            | 0,75 |
| split hand/foot malformation (ectrodactyly) type 1                                            | SHFM1          | 0,75 |
| zinc finger protein 891                                                                       | ZNF891         | 0,75 |
| chromodomain protein, Y-linked, 2B; chromodomain protein, Y-linked, 2A                        | CDY2B; CDY2A   | 0,75 |
| transforming growth factor beta regulator 4; small nucleolar RNA, H/ACA box 5B                | TBRG4; SNORA5B | 0,75 |
| cyclin-dependent kinase 12                                                                    | CDK12          | 0,75 |
| olfactory receptor, family 6, subfamily Y, member 1                                           | OR6Y1          | 0,75 |
| Transcript Identified by AceView, Entrez Gene ID(s) 4674                                      | NAP1L2         | 0,75 |
| G protein-coupled receptor 52                                                                 | GPR52          | 0,75 |
| solute carrier family 2 (facilitated glucose/fructose transporter), member 5                  | SLC2A5         | 0,75 |
| astacin-like metallo-endopeptidase (M12 family)                                               | ASTL           | 0,75 |
| glyoxalase domain containing 4                                                                | GLOD4          | 0,75 |
| zinc finger protein 607                                                                       | ZNF607         | 0,75 |
| retinoblastoma binding protein 7                                                              | RBBP7          | 0,75 |
| solute carrier family 15, member 5                                                            | SLC15A5        | 0,75 |
| RIC1 homolog, RAB6A GEF complex partner 1                                                     | RIC1           | 0,75 |
| Fanconi anemia core complex associated protein 100                                            | FAAP100        | 0,74 |
| BCL2-like 14 (apoptosis facilitator)                                                          | BCL2L14        | 0,74 |
| serrate, RNA effector molecule                                                                | SRRT           | 0,74 |
| SEC62 homolog, preprotein translocation factor                                                | SEC62          | 0,74 |
| PCI domain containing 2                                                                       | PCID2          | 0,74 |
| olfactory receptor, family 6, subfamily C, member 68                                          | OR6C68         | 0,74 |
| calcium channel flower domain containing 1                                                    | CACFD1         | 0,74 |
| Memczak2013 ANTISENSE, CDS, coding, INTERNAL best transcript NM_006044                        | HDAC6          | 0,74 |
| pseudouridylate synthase 7 (putative)                                                         | PUS7           | 0,74 |
| zinc finger protein 263                                                                       | ZNF263         | 0,74 |
| MAS-related GPR, member E                                                                     | MRGPRE         | 0,74 |
| Cdk5 and Abl enzyme substrate 1                                                               | CABLES1        | 0,74 |
| tripartite motif containing 52                                                                | TRIM52         | 0,74 |
| RAB15, member RAS oncogene family                                                             | RAB15          | 0,74 |

|                                                                                                                                                                                       |                                 |      |
|---------------------------------------------------------------------------------------------------------------------------------------------------------------------------------------|---------------------------------|------|
| Transcript Identified by AceView, Entrez Gene ID(s) 22873                                                                                                                             | DZIP1                           | 0,74 |
| forkhead box M1                                                                                                                                                                       | FOXM1                           | 0,74 |
| potassium channel, voltage gated subfamily E regulatory beta subunit 4                                                                                                                | KCNE4                           | 0,74 |
| aldehyde dehydrogenase 9 family, member A1                                                                                                                                            | ALDH9A1                         | 0,74 |
| magnesium-dependent phosphatase 1; NEDD8-MDP1 readthrough; neural precursor cell expressed, developmentally down-regulated 8; charged multivesicular body protein 4A                  | MDP1; NEDD8-MDP1; NEDD8; CHMP4A | 0,74 |
| NADH dehydrogenase (ubiquinone) Fe-S protein 4, 18kDa (NADH-coenzyme Q reductase)                                                                                                     | NDUFS4                          | 0,74 |
| nuclear pore complex interacting protein family, member A7; nuclear pore complex interacting protein family, member A8; polycystic kidney disease 1 (autosomal dominant) pseudogene 1 | NPIPA7; NPIPA8; PKD1P1          | 0,74 |
| RIC8 guanine nucleotide exchange factor B                                                                                                                                             | RIC8B                           | 0,74 |
| FYVE, RhoGEF and PH domain containing 1                                                                                                                                               | FGD1                            | 0,74 |
| replication timing regulatory factor 1                                                                                                                                                | RIF1                            | 0,74 |
| mitochondrial ribosomal protein L39                                                                                                                                                   | MRPL39                          | 0,74 |
| POM121 transmembrane nucleoporin-like 12                                                                                                                                              | POM121L12                       | 0,74 |
| gamma-glutamyltransferase 6                                                                                                                                                           | GGT6                            | 0,74 |
| RANBP2-like and GRIP domain containing 4                                                                                                                                              | RGPD4                           | 0,74 |
| nudix hydrolase 11                                                                                                                                                                    | NUDT11                          | 0,74 |
| KH domain containing, RNA binding, signal transduction associated 3                                                                                                                   | KHDRBS3                         | 0,74 |
| ataxin 10                                                                                                                                                                             | ATXN10                          | 0,74 |
| ring finger protein 133                                                                                                                                                               | RNF133                          | 0,74 |
| nudix hydrolase 22                                                                                                                                                                    | NUDT22                          | 0,74 |
| hCG1657980; Transcript Identified by AceView, Entrez Gene ID(s) 200726, RefSeq ID(s) NM_001102659; novel transcript                                                                   | LOC200726; AC010731.4           | 0,74 |
| ribosomal protein L34                                                                                                                                                                 | RPL34                           | 0,74 |
| gap junction protein gamma 3                                                                                                                                                          | GJC3                            | 0,74 |
| dipeptidyl-peptidase 10 (inactive)                                                                                                                                                    | DPP10                           | 0,74 |
| TATA element modulatory factor 1                                                                                                                                                      | TMF1                            | 0,74 |
| potassium channel, calcium activated intermediate/small conductance subfamily N alpha, member 3                                                                                       | KCNN3                           | 0,74 |
| armadillo repeat containing, X-linked 6                                                                                                                                               | ARMCX6                          | 0,74 |
| N(alpha)-acetyltransferase 16, NatA auxiliary subunit                                                                                                                                 | NAA16                           | 0,74 |
| chromosome X open reading frame 40A                                                                                                                                                   | CXorf40A                        | 0,74 |
| zinc finger protein 286B; forkhead box O3B pseudogene                                                                                                                                 | ZNF286B; FOXO3B                 | 0,74 |
| phosphoribosyl transferase domain containing 1                                                                                                                                        | PRTFDC1                         | 0,74 |

|                                                                                                                    |                                    |      |
|--------------------------------------------------------------------------------------------------------------------|------------------------------------|------|
| NADH dehydrogenase (ubiquinone) Fe-S protein 6, 13kDa (NADH-coenzyme Q reductase)                                  | NDUFS6                             | 0,74 |
| ATP synthase, H <sup>+</sup> transporting, mitochondrial Fo complex subunit C2 (subunit 9)                         | ATP5G2                             | 0,74 |
| zinc finger protein 780A                                                                                           | ZNF780A                            | 0,74 |
| transmembrane protein 67                                                                                           | TMEM67                             | 0,74 |
| N-deacetylase/N-sulfotransferase (heparan glucosaminyl) 2                                                          | NDST2                              | 0,74 |
| inducible T-cell co-stimulator                                                                                     | ICOS                               | 0,74 |
| histone cluster 1, H2bj                                                                                            | HIST1H2BJ                          | 0,74 |
| protein phosphatase 1, regulatory subunit 3D                                                                       | PPP1R3D                            | 0,74 |
| zinc finger protein 852                                                                                            | ZNF852                             | 0,74 |
| glycerol-3-phosphate dehydrogenase 2                                                                               | GPD2                               | 0,74 |
| Rho guanine nucleotide exchange factor 28                                                                          | ARHGEF28                           | 0,74 |
| TGFB1-induced anti-apoptotic factor 1; myosin XVIII A                                                              | TIAF1; MYO18A                      | 0,74 |
| proline rich 7 (synaptic)                                                                                          | PRR7                               | 0,74 |
| solute carrier family 5 (sodium/multivitamin and iodide cotransporter), member 6                                   | SLC5A6                             | 0,74 |
| synovial apoptosis inhibitor 1, synoviolin                                                                         | SYVN1                              | 0,74 |
| heat shock factor binding protein 1-like 1                                                                         | HSBP1L1                            | 0,74 |
| sodium channel, voltage gated, type II alpha subunit                                                               | SCN2A                              | 0,74 |
| perilipin 2                                                                                                        | PLIN2                              | 0,74 |
| ataxin 7-like 3                                                                                                    | ATXN7L3                            | 0,74 |
| ring finger protein 148                                                                                            | RNF148                             | 0,74 |
| olfactory receptor, family 2, subfamily G, member 6                                                                | OR2G6                              | 0,74 |
| POTE ankyrin domain family, member B2; POTE ankyrin domain family, member B; POTE ankyrin domain family, member B3 | POTEB2; POTEB; POTEB3              | 0,74 |
| dystrobrevin binding protein 1                                                                                     | DTNBP1                             | 0,74 |
| MPV17 mitochondrial membrane protein-like 2                                                                        | MPV17L2                            | 0,74 |
| zinc finger protein 620                                                                                            | ZNF620                             | 0,74 |
| SID1 transmembrane family, member 2                                                                                | SIDT2                              | 0,74 |
| stress-associated endoplasmic reticulum protein family member 2                                                    | SERP2                              | 0,74 |
| Transcript Identified by AceView, Entrez Gene ID(s) 80205                                                          | CHD9                               | 0,74 |
| uncharacterized LOC399886; Transcript Identified by AceView, Entrez Gene ID(s) 399886; novel transcript            | LOC399886; RP11-430H10.2; FLJ41423 | 0,74 |
| non-SMC condensin II complex subunit D3                                                                            | NCAPD3                             | 0,74 |
| solute carrier family 16 (monocarboxylate transporter), member 1                                                   | SLC16A1                            | 0,74 |
| WAS/WASL interacting protein family, member 1                                                                      | WIPF1                              | 0,74 |
| leucine, glutamate and lysine rich 1                                                                               | LEKR1                              | 0,74 |
| proline-rich coiled-coil 1                                                                                         | PRRC1                              | 0,74 |



|                                                                                                                                                                                                                                       |                  |      |
|---------------------------------------------------------------------------------------------------------------------------------------------------------------------------------------------------------------------------------------|------------------|------|
| cullin 4B                                                                                                                                                                                                                             | CUL4B            | 0,74 |
| SH2B adaptor protein 1                                                                                                                                                                                                                | SH2B1            | 0,74 |
| SFT2 domain containing 2                                                                                                                                                                                                              | SFT2D2           | 0,74 |
| ecto-NOX disulfide-thiol exchanger 2                                                                                                                                                                                                  | ENOX2            | 0,74 |
| uronyl-2-sulfotransferase                                                                                                                                                                                                             | UST              | 0,74 |
| WD repeat domain 48                                                                                                                                                                                                                   | WDR48            | 0,74 |
| CDC42 effector protein (Rho GTPase binding) 1                                                                                                                                                                                         | CDC42EP1         | 0,74 |
| tRNA methyltransferase 1 like                                                                                                                                                                                                         | TRMT1L           | 0,74 |
| transcription factor CP2                                                                                                                                                                                                              | TFCP2            | 0,74 |
| secernin 3                                                                                                                                                                                                                            | SCRN3            | 0,74 |
| G protein-coupled receptor 32                                                                                                                                                                                                         | GPR32            | 0,74 |
| pyruvate dehydrogenase (lipoamide) alpha 2                                                                                                                                                                                            | PDHA2            | 0,74 |
| opsin 3                                                                                                                                                                                                                               | OPN3             | 0,74 |
| jumonji domain containing 6                                                                                                                                                                                                           | JMJD6            | 0,74 |
| small G protein signaling modulator 3                                                                                                                                                                                                 | SGSM3            | 0,74 |
| GATA binding protein 6                                                                                                                                                                                                                | GATA6            | 0,74 |
| storkhead box 1                                                                                                                                                                                                                       | STOX1            | 0,74 |
| chromosome 16 open reading frame 58                                                                                                                                                                                                   | C16orf58         | 0,74 |
| F-box protein 9                                                                                                                                                                                                                       | FBXO9            | 0,74 |
| carbonyl reductase 1                                                                                                                                                                                                                  | CBR1             | 0,74 |
| serine/threonine kinase 38 like                                                                                                                                                                                                       | STK38L           | 0,74 |
| leucine zipper, putative tumor suppressor family member 3; Leucine zipper putative tumor suppressor 3<br>[Source:UniProtKB/Swiss-Prot;Acc:O60299]; Salzman2013 ANNOTATED, CDS, coding, OVCODE, OVEXON, UTR5 best transcript NM_014731 | LZTS3; ProSAP1P1 | 0,74 |
| LSM8 homolog, U6 small nuclear RNA associated                                                                                                                                                                                         | LSM8             | 0,74 |
| nuclear factor of kappa light polypeptide gene enhancer in B-cells inhibitor, zeta                                                                                                                                                    | NFKBIZ           | 0,74 |
| fat storage-inducing transmembrane protein 2                                                                                                                                                                                          | FITM2            | 0,74 |
| mitogen-activated protein kinase 8                                                                                                                                                                                                    | MAPK8            | 0,74 |
| zinc finger family member 788                                                                                                                                                                                                         | ZNF788           | 0,74 |
| Transcript Identified by AceView, Entrez Gene ID(s) 116441                                                                                                                                                                            | TM4SF18          | 0,74 |
| gem nuclear organelle associated protein 5                                                                                                                                                                                            | GEMIN5           | 0,74 |
| glucoside xylosyltransferase 1                                                                                                                                                                                                        | GXYLT1           | 0,74 |
| BPI fold containing family B, member 3                                                                                                                                                                                                | BPIFB3           | 0,74 |
| WD and tetratricopeptide repeats 1                                                                                                                                                                                                    | WDTC1            | 0,74 |
| ubiquitin specific peptidase 31                                                                                                                                                                                                       | USP31            | 0,74 |
| v-crkl avian sarcoma virus CT10 oncogene homolog-like                                                                                                                                                                                 | CRKL             | 0,74 |
| family with sequence similarity 45, member A                                                                                                                                                                                          | FAM45A           | 0,74 |
| mitochondrial translational initiation factor 3                                                                                                                                                                                       | MTIF3            | 0,74 |
| long intergenic non-protein coding RNA 1549                                                                                                                                                                                           | LINC01549        | 0,74 |
| olfactory receptor, family 4, subfamily X, member 1 (gene/pseudogene)                                                                                                                                                                 | OR4X1            | 0,74 |

|                                                                                                                                                                                                                                                                                                                                                                                                                      |                               |      |
|----------------------------------------------------------------------------------------------------------------------------------------------------------------------------------------------------------------------------------------------------------------------------------------------------------------------------------------------------------------------------------------------------------------------|-------------------------------|------|
| Memczak2013 ALT_ACCEPTOR, ALT_DONOR, coding, INTERNAL, intronic best transcript NM_012479                                                                                                                                                                                                                                                                                                                            | YWHAG                         | 0,74 |
| transient receptor potential cation channel, subfamily C, member 2-like; Salzman2013 ANNOTATED, INTERNAL, ncRNA, OVEXON best transcript NR_029192; Transcript Identified by AceView, Entrez Gene ID(s) 100133315, RefSeq ID(s) NR_029192; Transcript Identified by AceView, Entrez Gene ID(s) 100133315; Putative short transient receptor potential channel 2-like protein [Source:UniProtKB/Swiss-Prot;Acc:Q6ZNB5] | LOC100133315;<br>RP11-849H4.2 | 0,74 |
| kaptin (actin binding protein)                                                                                                                                                                                                                                                                                                                                                                                       | KPTN                          | 0,74 |
| DDB1 and CUL4 associated factor 7                                                                                                                                                                                                                                                                                                                                                                                    | DCAF7                         | 0,74 |
| oxidoreductase NAD-binding domain containing 1                                                                                                                                                                                                                                                                                                                                                                       | OXNAD1                        | 0,74 |
| RFT1 homolog                                                                                                                                                                                                                                                                                                                                                                                                         | RFT1                          | 0,74 |
| radial spoke head 1 homolog (Chlamydomonas)                                                                                                                                                                                                                                                                                                                                                                          | RSPH1                         | 0,74 |
| corepressor interacting with RBPJ, 1                                                                                                                                                                                                                                                                                                                                                                                 | CIR1                          | 0,74 |
| elongator acetyltransferase complex subunit 2                                                                                                                                                                                                                                                                                                                                                                        | ELP2                          | 0,74 |
| tumor protein p53 inducible protein 11                                                                                                                                                                                                                                                                                                                                                                               | TP53I11                       | 0,74 |
| golgi phosphoprotein 3-like                                                                                                                                                                                                                                                                                                                                                                                          | GOLPH3L                       | 0,74 |
| ribosomal protein L35                                                                                                                                                                                                                                                                                                                                                                                                | RPL35                         | 0,74 |
| glycosylphosphatidylinositol anchored molecule like                                                                                                                                                                                                                                                                                                                                                                  | GML                           | 0,74 |
| anaphase promoting complex subunit 16                                                                                                                                                                                                                                                                                                                                                                                | ANAPC16                       | 0,74 |
| UBA domain containing 1                                                                                                                                                                                                                                                                                                                                                                                              | UBAC1                         | 0,74 |
| secretion associated, Ras related GTPase 1B                                                                                                                                                                                                                                                                                                                                                                          | SAR1B                         | 0,74 |
| chromosome 20 open reading frame 203                                                                                                                                                                                                                                                                                                                                                                                 | C20orf203                     | 0,74 |
| zinc finger protein 615                                                                                                                                                                                                                                                                                                                                                                                              | ZNF615                        | 0,74 |
| nuclear respiratory factor 1                                                                                                                                                                                                                                                                                                                                                                                         | NRF1                          | 0,74 |
| coatomer protein complex subunit alpha                                                                                                                                                                                                                                                                                                                                                                               | COPA                          | 0,74 |
| Memczak2013 ALT_ACCEPTOR, ALT_DONOR, coding, INTERNAL, intronic best transcript NM_022479                                                                                                                                                                                                                                                                                                                            | WBSCR17                       | 0,74 |
| zinc finger and BTB domain containing 46                                                                                                                                                                                                                                                                                                                                                                             | ZBTB46                        | 0,74 |
| caspase 7                                                                                                                                                                                                                                                                                                                                                                                                            | CASP7                         | 0,74 |
| serine dehydratase                                                                                                                                                                                                                                                                                                                                                                                                   | SDS                           | 0,74 |
| TSPY-like 4                                                                                                                                                                                                                                                                                                                                                                                                          | TSPYL4                        | 0,74 |
| amino-terminal enhancer of split                                                                                                                                                                                                                                                                                                                                                                                     | AES                           | 0,74 |
| mitochondrial ribosomal protein L41                                                                                                                                                                                                                                                                                                                                                                                  | MRPL41                        | 0,74 |
| heterogeneous nuclear ribonucleoprotein D like                                                                                                                                                                                                                                                                                                                                                                       | HNRNPDL                       | 0,74 |
| reticulocalbin 3, EF-hand calcium binding domain                                                                                                                                                                                                                                                                                                                                                                     | RCN3                          | 0,74 |
| Memczak2013 ALT_ACCEPTOR, ALT_DONOR, coding, INTERNAL, intronic best transcript NM_001166007                                                                                                                                                                                                                                                                                                                         | EPB41                         | 0,74 |
| adenosine deaminase-like                                                                                                                                                                                                                                                                                                                                                                                             | ADAL                          | 0,74 |
| MAU2 sister chromatid cohesion factor                                                                                                                                                                                                                                                                                                                                                                                | MAU2                          | 0,74 |
| NUT family member 2B                                                                                                                                                                                                                                                                                                                                                                                                 | NUTM2B                        | 0,74 |
| zinc finger protein 587B                                                                                                                                                                                                                                                                                                                                                                                             | ZNF587B                       | 0,74 |

|                                                                                                                      |                     |      |
|----------------------------------------------------------------------------------------------------------------------|---------------------|------|
| Transcript Identified by AceView; Memczak2013<br>ANTISENSE, CDS, coding, INTERNAL, UTR3 best transcript<br>NM_004526 | goyborbu; MCM2      | 0,74 |
| WD repeat domain 4                                                                                                   | WDR4                | 0,74 |
| TBC1 (tre-2/USP6, BUB2, cdc16) domain family, member 1                                                               | TBC1D1              | 0,74 |
| transmembrane protein 9                                                                                              | TMEM9               | 0,74 |
| threonyl-tRNA synthetase 2, mitochondrial (putative);<br>microRNA 6878                                               | TARS2; MIR6878      | 0,74 |
| peptidylprolyl isomerase B (cyclophilin B)                                                                           | PPIB                | 0,74 |
| ring finger protein 123                                                                                              | RNF123              | 0,73 |
| fatty acid binding protein 2, intestinal                                                                             | FABP2               | 0,73 |
| claudin 11                                                                                                           | CLDN11              | 0,73 |
| stanniocalcin 2                                                                                                      | STC2                | 0,73 |
| ninjurin 1                                                                                                           | NINJ1               | 0,73 |
| aldehyde dehydrogenase 7 family, member A1                                                                           | ALDH7A1             | 0,73 |
| heterogeneous nuclear ribonucleoprotein A1                                                                           | HNRNPA1             | 0,73 |
| SEC22 homolog C, vesicle trafficking protein                                                                         | SEC22C              | 0,73 |
| signal-regulatory protein alpha                                                                                      | SIRPA               | 0,73 |
| ubiquitination factor E4B                                                                                            | UBE4B               | 0,73 |
| zinc finger protein 664                                                                                              | ZNF664              | 0,73 |
| erythropoietin receptor                                                                                              | EPOR                | 0,73 |
| kinesin family member 5B                                                                                             | KIF5B               | 0,73 |
| calnexin                                                                                                             | CANX                | 0,73 |
| dedicator of cytokinesis 8                                                                                           | DOCK8               | 0,73 |
| ninein-like                                                                                                          | NINL                | 0,73 |
| glutamyl-tRNA(Gln) amidotransferase, subunit C                                                                       | GATC                | 0,73 |
| matrix metalloproteinase 11                                                                                          | MMP11               | 0,73 |
| serine/arginine-rich splicing factor 7                                                                               | SRSF7               | 0,73 |
| ribosomal protein L23a pseudogene 5                                                                                  | RPL23AP5            | 0,73 |
| decapping mRNA 1A                                                                                                    | DCP1A               | 0,73 |
| stromal antigen 3-like 3 (pseudogene); stromal antigen 3-<br>like 2 (pseudogene)                                     | STAG3L3;<br>STAG3L2 | 0,73 |
| olfactory receptor, family 4, subfamily F, member 5                                                                  | OR4F5               | 0,73 |
| olfactory receptor, family 10, subfamily H, member 1                                                                 | OR10H1              | 0,73 |
| sushi, nidogen and EGF-like domains 1                                                                                | SNED1               | 0,73 |
| ecotropic viral integration site 5                                                                                   | EVI5                | 0,73 |
| SLAM family member 8                                                                                                 | SLAMF8              | 0,73 |
| InaD-like (Drosophila)                                                                                               | INADL               | 0,73 |
| caspase 16, pseudogene                                                                                               | CASP16P             | 0,73 |
| Transcript Identified by AceView, Entrez Gene ID(s) 9793                                                             | CKAP5               | 0,73 |
| zinc finger protein 780A                                                                                             | ZNF780A             | 0,73 |
| ubiquitin conjugating enzyme E2N                                                                                     | UBE2N               | 0,73 |
| synaptonemal complex central element protein 2                                                                       | SYCE2               | 0,73 |

|                                                                                                           |                     |      |
|-----------------------------------------------------------------------------------------------------------|---------------------|------|
| chromosome 5 open reading frame 66                                                                        | C5orf66             | 0,73 |
| deleted in lung and esophageal cancer 1                                                                   | DLEC1               | 0,73 |
| Memczak2013 ALT_ACCEPTOR, ALT_DONOR, coding, INTERNAL, intronic best transcript NM_018460                 | ARHGAP15            | 0,73 |
| fibrillin 3                                                                                               | FBN3                | 0,73 |
| vasohibin 2                                                                                               | VASH2               | 0,73 |
| poly(A) binding protein interacting protein 2                                                             | PAIP2               | 0,73 |
| minichromosome maintenance complex component 7                                                            | MCM7                | 0,73 |
| major facilitator superfamily domain containing 3                                                         | MFSD3               | 0,73 |
| NADH dehydrogenase (ubiquinone) 1 beta subcomplex, 6, 17kDa                                               | NDUFB6              | 0,73 |
| RecQ helicase-like 4                                                                                      | RECQL4              | 0,73 |
| secreted phosphoprotein 1                                                                                 | SPP1                | 0,73 |
| keratin associated protein 23-1                                                                           | KRTAP23-1           | 0,73 |
| eukaryotic translation elongation factor 2; small nucleolar RNA, C/D box 37                               | EEF2; SNORD37       | 0,73 |
| aminoadipate-semialdehyde dehydrogenase                                                                   | AASDH               | 0,73 |
| armadillo repeat containing 12                                                                            | ARMC12              | 0,73 |
| zinc finger protein 565                                                                                   | ZNF565              | 0,73 |
| leucine rich repeat containing 20                                                                         | LRRC20              | 0,73 |
| olfactory receptor, family 52, subfamily L, member 1                                                      | OR52L1              | 0,73 |
| annexin A9                                                                                                | ANXA9               | 0,73 |
| Transcript Identified by AceView, Entrez Gene ID(s) 57798; novel transcript, antisense to ERVW-1 and PEX1 | AC007566.10; GATAD1 | 0,73 |
| S-antigen; retina and pineal gland (arrestin)                                                             | SAG                 | 0,73 |
| protein phosphatase 4, regulatory subunit 1                                                               | PPP4R1              | 0,73 |
| ring finger protein 166                                                                                   | RNF166              | 0,73 |
| proline-rich basic protein 1                                                                              | PROB1               | 0,73 |
| calcium channel flower domain containing 1                                                                | CACFD1              | 0,73 |
| tumor protein p63 regulated 1-like                                                                        | TPRG1L              | 0,73 |
| histone deacetylase 11                                                                                    | HDAC11              | 0,73 |
| ATP synthase, H <sup>+</sup> transporting, mitochondrial Fo complex subunit F2                            | ATP5J2              | 0,73 |
| FAT atypical cadherin 4                                                                                   | FAT4                | 0,73 |
| minichromosome maintenance 10 replication initiation factor                                               | MCM10               | 0,73 |
| family with sequence similarity 199, X-linked                                                             | FAM199X             | 0,73 |
| anoctamin 8                                                                                               | ANO8                | 0,73 |
| KH domain containing, RNA binding, signal transduction associated 1                                       | KHDRBS1             | 0,73 |
| zinc finger and SCAN domain containing 29                                                                 | ZSCAN29             | 0,73 |
| RWD domain containing 4                                                                                   | RWDD4               | 0,73 |
| DCN1, defective in cullin neddylation 1, domain containing 4                                              | DCUN1D4             | 0,73 |
| protein geranylgeranyltransferase type I, beta subunit                                                    | PGGT1B              | 0,73 |

|                                                                                  |                                     |      |
|----------------------------------------------------------------------------------|-------------------------------------|------|
| LHX4 antisense RNA 1; acyl-CoA binding domain containing 6                       | LHX4-AS1; ACBD6                     | 0,73 |
| tight junction protein 2                                                         | TJP2                                | 0,73 |
| zinc finger protein 442                                                          | ZNF442                              | 0,73 |
| ADP-ribosylation factor interacting protein 2                                    | ARFIP2                              | 0,73 |
| olfactory receptor, family 2, subfamily AE, member 1                             | OR2AE1                              | 0,73 |
| DDB1 and CUL4 associated factor 5                                                | DCAF5                               | 0,73 |
| tRNA methyltransferase 61B                                                       | TRMT61B                             | 0,73 |
| isoleucyl-tRNA synthetase 2, mitochondrial                                       | IARS2                               | 0,73 |
| carbohydrate (chondroitin 6) sulfotransferase 3                                  | CHST3                               | 0,73 |
| SURP and G-patch domain containing 2                                             | SUGP2                               | 0,73 |
| MIF antisense RNA 1                                                              | MIF-AS1                             | 0,73 |
| hematopoietic SH2 domain containing                                              | HSH2D                               | 0,73 |
| agouti related neuropeptide                                                      | AGRP                                | 0,73 |
| sperm associated antigen 1                                                       | SPAG1                               | 0,73 |
| zinc ribbon domain containing 1                                                  | ZNRD1                               | 0,73 |
| Myb-related transcription factor, partner of profilin                            | MYPOP                               | 0,73 |
| fatty acyl CoA reductase 1                                                       | FAR1                                | 0,73 |
| inositol 1,4,5-trisphosphate receptor, type 1                                    | ITPR1                               | 0,73 |
| CXXC finger protein 1                                                            | CXXC1                               | 0,73 |
| MALT1 paracaspase                                                                | MALT1                               | 0,73 |
| F-box protein 21                                                                 | FBXO21                              | 0,73 |
| glioma tumor suppressor candidate region gene 2; small nucleolar RNA, C/D box 23 | GLTSCR2;<br>SNORD23                 | 0,73 |
| Rho GTPase activating protein 26                                                 | ARHGAP26                            | 0,73 |
| Rho GTPase activating protein 32                                                 | ARHGAP32                            | 0,73 |
| polycomb group ring finger 2                                                     | PCGF2                               | 0,73 |
| exportin, tRNA                                                                   | XPOT                                | 0,73 |
| calcium channel flower domain containing 1                                       | CACFD1                              | 0,73 |
| Transcript Identified by AceView, Entrez Gene ID(s) 10580                        | SORBS1                              | 0,73 |
| zinc finger protein 552                                                          | ZNF552                              | 0,73 |
| coiled-coil and C2 domain containing 2B                                          | CC2D2B                              | 0,73 |
| heterogeneous nuclear ribonucleoprotein A3; microRNA 4444-2; microRNA 4444-1     | HNRNPA3;<br>MIR4444-2;<br>MIR4444-1 | 0,73 |
| oxysterol binding protein-like 9                                                 | OSBPL9                              | 0,73 |
| BCL2 binding component 3; microRNA 3191                                          | BBC3; MIR3191                       | 0,73 |
| zinc finger protein 425                                                          | ZNF425                              | 0,73 |
| kinesin family member 15                                                         | KIF15                               | 0,73 |
| negative elongation factor complex member A; microRNA 943                        | NELFA; MIR943                       | 0,73 |
| cilia and flagella associated protein 221                                        | CFAP221                             | 0,73 |
| long intergenic non-protein coding RNA 1089                                      | LINC01089                           | 0,73 |
| SMC5-SMC6 complex localization factor 2                                          | SLF2                                | 0,73 |

|                                                                                                        |                    |      |
|--------------------------------------------------------------------------------------------------------|--------------------|------|
| synuclein alpha                                                                                        | SNCA               | 0,73 |
| Rac GTPase activating protein 1                                                                        | RACGAP1            | 0,73 |
| ATPase type 13A1                                                                                       | ATP13A1            | 0,73 |
| KISS1 receptor                                                                                         | KISS1R             | 0,73 |
| ankyrin repeat and MYND domain containing 2                                                            | ANKMY2             | 0,73 |
| dicarbonyl/L-xylulose reductase                                                                        | DCXR               | 0,73 |
| Memczak2013 ANTISENSE, CDS, coding, INTERNAL, UTR3<br>best transcript NM_004521                        | KIF5B              | 0,73 |
| aquaporin 12A                                                                                          | AQP12A             | 0,73 |
| GH3 domain containing                                                                                  | GHDC               | 0,73 |
| transmembrane protein 63B                                                                              | TMEM63B            | 0,73 |
| amnion associated transmembrane protein                                                                | AMN                | 0,73 |
| Transcript Identified by AceView, Entrez Gene ID(s) 54875                                              | CNTLN              | 0,73 |
| melanocortin 2 receptor accessory protein                                                              | MRAP               | 0,73 |
| golgin A3                                                                                              | GOLGA3             | 0,73 |
| chromosome 2 open reading frame 78                                                                     | C2orf78            | 0,73 |
| histone cluster 3, H2bb                                                                                | HIST3H2BB          | 0,73 |
| Memczak2013 ANTISENSE, CDS, coding, INTERNAL,<br>intronic best transcript NM_003049                    | SLC10A1            | 0,73 |
| solute carrier family 6 (neutral amino acid transporter),<br>member 18                                 | SLC6A18            | 0,73 |
| component of oligomeric golgi complex 4                                                                | COG4               | 0,73 |
| carcinoembryonic antigen-related cell adhesion molecule<br>5                                           | CEACAM5            | 0,73 |
| transmembrane 4 L six family member 5                                                                  | TM4SF5             | 0,73 |
| neuroblastoma breakpoint family, member 6;<br>neuroblastoma breakpoint family, member 5,<br>pseudogene | NBPF6; NBPF5P      | 0,73 |
| septin 12                                                                                              | sept-12            | 0,73 |
| cAMP responsive element binding protein 1                                                              | CREB1              | 0,73 |
| calcyphosine-like                                                                                      | CAPSL              | 0,73 |
| NPC1-like 1                                                                                            | NPC1L1             | 0,73 |
| Zhang2013 ALT_ACCEPTOR, ALT_DONOR, coding,<br>INTERNAL, intronic best transcript NM_001146018          | TJAP1              | 0,73 |
| MGA, MAX dimerization protein                                                                          | MGA                | 0,73 |
| osteoglycin                                                                                            | OGN                | 0,73 |
| acidic nuclear phosphoprotein 32 family member A                                                       | ANP32A             | 0,73 |
| zinc finger protein 35                                                                                 | ZNF35              | 0,73 |
| transmembrane protein 258; microRNA 611                                                                | TMEM258;<br>MIR611 | 0,73 |
| leucine rich repeat containing 23                                                                      | LRRC23             | 0,73 |
| anoctamin 1, calcium activated chloride channel                                                        | ANO1               | 0,73 |
| Rho GTPase activating protein 24                                                                       | ARHGAP24           | 0,73 |
| surfactant protein A2; surfactant protein A1                                                           | SFTPA2; SFTPA1     | 0,73 |

|                                                                                          |                |      |
|------------------------------------------------------------------------------------------|----------------|------|
| polymerase (DNA-directed), delta interacting protein 2                                   | POLDIP2        | 0,73 |
| vascular endothelial growth factor B                                                     | VEGFB          | 0,73 |
| zinc finger with KRAB and SCAN domains 7                                                 | ZKSCAN7        | 0,73 |
| centrosomal protein 162kDa                                                               | CEP162         | 0,73 |
| SRY box 11                                                                               | SOX11          | 0,73 |
| family with sequence similarity 208, member B                                            | FAM208B        | 0,73 |
| ATP synthase, H <sup>+</sup> transporting, mitochondrial F1 complex, gamma polypeptide 1 | ATP5C1         | 0,73 |
| nicotinamide N-methyltransferase                                                         | NNMT           | 0,73 |
| olfactory receptor, family 8, subfamily A, member 1                                      | OR8A1          | 0,73 |
| secreted frizzled-related protein 5                                                      | SFRP5          | 0,73 |
| zinc finger protein 10                                                                   | ZNF10          | 0,73 |
| olfactory receptor, family 2, subfamily J, member 1 (gene/pseudogene)                    | OR2J1          | 0,73 |
| ribosomal protein S25                                                                    | RPS25          | 0,73 |
| axin 1                                                                                   | AXIN1          | 0,73 |
| caldesmon 1                                                                              | CALD1          | 0,73 |
| cleavage and polyadenylation specific factor 2                                           | CPSF2          | 0,73 |
| calponin 3, acidic                                                                       | CNN3           | 0,73 |
| eukaryotic translation initiation factor 4E binding protein 1                            | EIF4EBP1       | 0,73 |
| PRAME family member 10                                                                   | PRAMEF10       | 0,73 |
| dynein, light chain, LC8-type 2                                                          | DYNLL2         | 0,73 |
| Zhang2013 ALT_ACCEPTOR, ALT_DONOR, coding, INTERNAL, intronic best transcript NM_003908  | EIF2S2         | 0,73 |
| stathmin 1; microRNA 3917                                                                | STMN1; MIR3917 | 0,73 |
| SUB1 homolog, transcriptional regulator                                                  | SUB1           | 0,73 |
| paired related homeobox 2                                                                | PRRX2          | 0,73 |
| Transcript Identified by AceView, Entrez Gene ID(s) 7752                                 | ZNF200         | 0,73 |
| sterol carrier protein 2                                                                 | SCP2           | 0,73 |
| LY6/PLAUR domain containing 8                                                            | LYPD8          | 0,73 |
| guanylate binding protein 1, interferon-inducible                                        | GBP1           | 0,73 |
| serine hydrolase-like (pseudogene)                                                       | SERHL          | 0,73 |
| cornichon family AMPA receptor auxiliary protein 3                                       | CNIH3          | 0,73 |
| fermitin family member 2                                                                 | FERMT2         | 0,73 |
| SWIM-type zinc finger 7 associated protein 1                                             | SWSAP1         | 0,73 |
| transmembrane protein 203                                                                | TMEM203        | 0,73 |
| angiogenic factor with G-patch and FHA domains 1                                         | AGGF1          | 0,73 |
| replication timing regulatory factor 1                                                   | RIF1           | 0,73 |
| McKusick-Kaufman syndrome                                                                | MKKS           | 0,73 |
| syntaxin binding protein 6 (amisyn)                                                      | STXBP6         | 0,73 |
| purinergic receptor P2Y, G-protein coupled, 1                                            | P2RY1          | 0,73 |
| integrin beta 8                                                                          | ITGB8          | 0,73 |
| integrin beta 6                                                                          | ITGB6          | 0,73 |

|                                                                                |              |      |
|--------------------------------------------------------------------------------|--------------|------|
| tachykinin, precursor 1                                                        | TAC1         | 0,73 |
| zinc finger protein 439                                                        | ZNF439       | 0,73 |
| churchill domain containing 1                                                  | CHURC1       | 0,73 |
| protein phosphatase 2, regulatory subunit B, delta                             | PPP2R5D      | 0,72 |
| serine/threonine/tyrosine interacting protein                                  | STYX         | 0,72 |
| taste receptor, type 2, member 46                                              | TAS2R46      | 0,72 |
| leucine-rich repeat kinase 1                                                   | LRRK1        | 0,72 |
| proline-rich protein HaeIII subfamily 1                                        | PRH1         | 0,72 |
| surfeit 4                                                                      | SURF4        | 0,72 |
| zinc finger protein 577                                                        | ZNF577       | 0,72 |
| MCM3AP antisense RNA 1                                                         | MCM3AP-AS1   | 0,72 |
| vacuolar protein sorting 13 homolog B (yeast)                                  | VPS13B       | 0,72 |
| serine/threonine kinase 24                                                     | STK24        | 0,72 |
| COP9 signalosome subunit 6                                                     | COPS6        | 0,72 |
| methyltransferase like 25                                                      | METTL25      | 0,72 |
| cilia and flagella associated protein 46                                       | CFAP46       | 0,72 |
| Memczak2013 ANTISENSE, coding, INTERNAL, intronic<br>best transcript NM_198390 | CMIP         | 0,72 |
| AAR2 splicing factor homolog                                                   | AAR2         | 0,72 |
| TBC1 domain family, member 30                                                  | TBC1D30      | 0,72 |
| Transcript Identified by AceView, Entrez Gene ID(s) 9659                       | PDE4DIP      | 0,72 |
| zinc finger and BTB domain containing 39                                       | ZBTB39       | 0,72 |
| dihydrofolate reductase; dihydrofolate reductase<br>pseudogene 1               | DHFR; DHFRP1 | 0,72 |
| ZFP3 zinc finger protein                                                       | ZFP3         | 0,72 |
| platelet-derived growth factor receptor, alpha<br>polypeptide                  | PDGFRA       | 0,72 |
| adducin 2 (beta)                                                               | ADD2         | 0,72 |
| small integral membrane protein 20                                             | SMIM20       | 0,72 |
| Memczak2013 ANTISENSE, CDS, coding, INTERNAL best<br>transcript NM_004396      | DDX5         | 0,72 |
| RAB40B, member RAS oncogene family                                             | RAB40B       | 0,72 |
| ATPase, Na <sup>+</sup> /K <sup>+</sup> transporting, alpha 1 polypeptide      | ATP1A1       | 0,72 |
| MED14 opposite strand                                                          | MED14OS      | 0,72 |
| lysine (K)-specific demethylase 5D                                             | KDM5D        | 0,72 |
| chromosome 1 open reading frame 186                                            | C1orf186     | 0,72 |
| Memczak2013 ANTISENSE, CDS, coding, INTERNAL best<br>transcript NM_018031      | WDR6         | 0,72 |
| cyclin-dependent kinase 20                                                     | CDK20        | 0,72 |
| UV stimulated scaffold protein A                                               | UVSSA        | 0,72 |
| flap structure-specific endonuclease 1                                         | FEN1         | 0,72 |
| Transcript Identified by AceView, Entrez Gene ID(s) 80305                      | TRABD        | 0,72 |
| Morf4 family associated protein 1-like 1                                       | MRFAP1L1     | 0,72 |



|                                                                                                                                                            |                                            |      |
|------------------------------------------------------------------------------------------------------------------------------------------------------------|--------------------------------------------|------|
| zinc finger, DHHC-type containing 15                                                                                                                       | ZDHHC15                                    | 0,72 |
| uncharacterized LOC388282; novel transcript                                                                                                                | LOC388282; CTD-260009.1                    | 0,72 |
| transient receptor potential cation channel, subfamily C, member 4                                                                                         | TRPC4                                      | 0,72 |
| transmembrane protein 19                                                                                                                                   | TMEM19                                     | 0,72 |
| Transcript Identified by AceView, Entrez Gene ID(s) 10777                                                                                                  | ARPP21                                     | 0,72 |
| Transcript Identified by AceView, Entrez Gene ID(s) 23126                                                                                                  | POGZ                                       | 0,72 |
| penta-EF-hand domain containing 1                                                                                                                          | PEF1                                       | 0,72 |
| regulator of calcineurin 2                                                                                                                                 | RCAN2                                      | 0,72 |
| coiled-coil domain containing 134                                                                                                                          | CCDC134                                    | 0,72 |
| trichorhinophalangeal syndrome I                                                                                                                           | TRPS1                                      | 0,72 |
| HFM1, ATP-dependent DNA helicase homolog                                                                                                                   | HFM1                                       | 0,72 |
| eukaryotic translation initiation factor 4B                                                                                                                | EIF4B                                      | 0,72 |
| protein phosphatase 2A activator, regulatory subunit 4                                                                                                     | PPP2R4                                     | 0,72 |
| Yip1 domain family member 6                                                                                                                                | YIPF6                                      | 0,72 |
| Transcript Identified by AceView, Entrez Gene ID(s) 2903                                                                                                   | GRIN2A                                     | 0,72 |
| nuclear pore complex interacting protein family, member A2                                                                                                 | NPIPA2                                     | 0,72 |
| Jeck2013 ALT_ACCEPTOR, ALT_DONOR, coding, INTERNAL, intronic, OVERLAPTX best transcript NM_024911                                                          | WLS                                        | 0,72 |
| cell division cycle 26                                                                                                                                     | CDC26                                      | 0,72 |
| zinc finger protein 660                                                                                                                                    | ZNF660                                     | 0,72 |
| angiomotin; microRNA 4329                                                                                                                                  | AMOT; MIR4329                              | 0,72 |
| phosphatidylinositol glycan anchor biosynthesis class H                                                                                                    | PIGH                                       | 0,72 |
| tetratricopeptide repeat domain 21B                                                                                                                        | TTC21B                                     | 0,72 |
| zinc finger protein 326                                                                                                                                    | ZNF326                                     | 0,72 |
| wingless-type MMTV integration site family, member 3                                                                                                       | WNT3                                       | 0,72 |
| GDP dissociation inhibitor 2                                                                                                                               | GDI2                                       | 0,72 |
| anomalous homeobox                                                                                                                                         | ANHX                                       | 0,72 |
| insulin-like growth factor 2 mRNA binding protein 2                                                                                                        | IGF2BP2                                    | 0,72 |
| dynamin 1-like                                                                                                                                             | DNM1L                                      | 0,72 |
| ribosomal protein S8; small nucleolar RNA, C/D box 55; small nucleolar RNA, C/D box 46; small nucleolar RNA, C/D box 38A; small nucleolar RNA, C/D box 38B | RPS8; SNORD55; SNORD46; SNORD38A; SNORD38B | 0,72 |
| caspase 9                                                                                                                                                  | CASP9                                      | 0,72 |
| interleukin 18 binding protein                                                                                                                             | IL18BP                                     | 0,72 |
| cell division cycle associated 4                                                                                                                           | CDCA4                                      | 0,72 |
| small nuclear ribonucleoprotein polypeptide G                                                                                                              | SNRPG                                      | 0,72 |
| prostaglandin F2 receptor inhibitor                                                                                                                        | PTGFRN                                     | 0,72 |

|                                                                                                                                                                                |                                               |      |
|--------------------------------------------------------------------------------------------------------------------------------------------------------------------------------|-----------------------------------------------|------|
| ER lipid raft associated 1                                                                                                                                                     | ERLIN1                                        | 0,72 |
| tetratricopeptide repeat domain 7A                                                                                                                                             | TTC7A                                         | 0,72 |
| cell death-inducing p53 target 1                                                                                                                                               | CDIP1                                         | 0,72 |
| olfactory receptor, family 8, subfamily B, member 8                                                                                                                            | OR8B8                                         | 0,72 |
| zinc finger protein 181                                                                                                                                                        | ZNF181                                        | 0,72 |
| FK506 binding protein like                                                                                                                                                     | FKBPL                                         | 0,72 |
| Jeck2013 ALT_DONOR, coding, INTERNAL, intronic best transcript NM_016732                                                                                                       | RALY                                          | 0,72 |
| SH3 domain containing ring finger 3                                                                                                                                            | SH3RF3                                        | 0,72 |
| erythrocyte membrane protein band 4.1 like 5                                                                                                                                   | EPB41L5                                       | 0,72 |
| siah E3 ubiquitin protein ligase 2                                                                                                                                             | SIAH2                                         | 0,72 |
| Transcript Identified by AceView, Entrez Gene ID(s) 23184; novel transcript, antisense to CEMIP                                                                                | RP11-351M8.2; MESDC2; RP11-351M8.1            | 0,72 |
| SWI/SNF related, matrix associated, actin dependent regulator of chromatin, subfamily a, member 2                                                                              | SMARCA2                                       | 0,72 |
| speckle-type POZ protein-like                                                                                                                                                  | SPOPL                                         | 0,72 |
| NCK-associated protein 5-like                                                                                                                                                  | NCKAP5L                                       | 0,72 |
| erythrocyte membrane protein band 4.1-like 2                                                                                                                                   | EPB41L2                                       | 0,72 |
| zinc finger protein 660                                                                                                                                                        | ZNF660                                        | 0,72 |
| zinc finger protein 32                                                                                                                                                         | ZNF32                                         | 0,72 |
| coactivator-associated arginine methyltransferase 1                                                                                                                            | CARM1                                         | 0,72 |
| Transcript Identified by AceView, Entrez Gene ID(s) 166378                                                                                                                     | SPATA5                                        | 0,72 |
| protein associated with topoisomerase II homolog 1 (yeast)                                                                                                                     | PATL1                                         | 0,72 |
| acyl-CoA binding domain containing 3                                                                                                                                           | ACBD3                                         | 0,72 |
| solute carrier family 22 (organic cation/carnitine transporter), member 5                                                                                                      | SLC22A5                                       | 0,72 |
| moesin                                                                                                                                                                         | MSN                                           | 0,72 |
| zinc finger protein 35                                                                                                                                                         | ZNF35                                         | 0,72 |
| polymerase (RNA) I polypeptide D                                                                                                                                               | POLR1D                                        | 0,72 |
| Salzman2013 ANTISENSE, CDS, coding, INTERNAL, intronic, OVCODE, OVERLAPTX, OVEXON, UTR3 best transcript NM_015178; novel transcript, antisense to RHOBTB2                      | RP11-875O11.1; RHOBTB2                        | 0,72 |
| Homo sapiens TMLHE antisense RNA 1 (TMLHE-AS1), long non-coding RNA.; uncharacterized LOC101927830; Transcript Identified by AceView, Entrez Gene ID(s) 1193; novel transcript | TMLHE-AS1; LOC101927830; CLIC2; RP13-228J13.1 | 0,72 |
| trans-golgi network protein 2                                                                                                                                                  | TGOLN2                                        | 0,72 |
| signal recognition particle 68kDa                                                                                                                                              | SRP68                                         | 0,72 |
| regulator of chromosome condensation 1; small nucleolar RNA, H/ACA box 73A; small nucleolar RNA host gene 3; small nucleolar RNA, H/ACA box 73B                                | RCC1; SNORA73A; SNHG3; SNORA73B               | 0,72 |

|                                                                                               |                           |      |
|-----------------------------------------------------------------------------------------------|---------------------------|------|
| inositol polyphosphate-5-phosphatase D                                                        | INPP5D                    | 0,72 |
| poly (ADP-ribose) glycohydrolase                                                              | PARG                      | 0,72 |
| histone cluster 2, H2aa4; histone cluster 2, H2aa3                                            | HIST2H2AA4;<br>HIST2H2AA3 | 0,72 |
| leucine twenty homeobox                                                                       | LEUTX                     | 0,72 |
| ribosomal protein L19                                                                         | RPL19                     | 0,72 |
| Transcript Identified by AceView, Entrez Gene ID(s) 57448                                     | BIRC6                     | 0,72 |
| nudix hydrolase 2                                                                             | NUDT2                     | 0,72 |
| vesicle associated membrane protein 4                                                         | VAMP4                     | 0,72 |
| DnaJ (Hsp40) homolog, subfamily B, member 9                                                   | DNAJB9                    | 0,72 |
| histone cluster 1, H2aa                                                                       | HIST1H2AA                 | 0,72 |
| Memczak2013 ANTISENSE, coding, INTERNAL, UTR3 best transcript NM_001195737                    | FAM213B                   | 0,72 |
| 3(2), 5-bisphosphate nucleotidase 1                                                           | BPNT1                     | 0,72 |
| chromosome 12 open reading frame 10                                                           | C12orf10                  | 0,72 |
| hydroxycarboxylic acid receptor 2                                                             | HCAR2                     | 0,72 |
| ankyrin repeat and zinc finger domain containing 1                                            | ANKZF1                    | 0,72 |
| SEC24 homolog C, COPII coat complex component                                                 | SEC24C                    | 0,72 |
| calcium channel flower domain containing 1                                                    | CACFD1                    | 0,72 |
| hypoxia up-regulated 1                                                                        | HYOU1                     | 0,72 |
| TNF receptor-associated factor 7, E3 ubiquitin protein ligase                                 | TRAF7                     | 0,72 |
| abhydrolase domain containing 17B                                                             | ABHD17B                   | 0,72 |
| prenyl (decaprenyl) diphosphate synthase, subunit 1                                           | PDSS1                     | 0,72 |
| dehydrogenase/reductase (SDR family) member 4                                                 | DHRS4                     | 0,72 |
| patched 2                                                                                     | PTCH2                     | 0,72 |
| transmembrane protein 170A                                                                    | TMEM170A                  | 0,72 |
| transforming growth factor beta receptor II                                                   | TGFBR2                    | 0,72 |
| Jeck2013 ANTISENSE, CDS, coding, INTERNAL, intronic, OVCODE, OVEXON best transcript NM_181453 | GCC2                      | 0,72 |
| DNA (cytosine-5-)-methyltransferase 1                                                         | DNMT1                     | 0,72 |
| aarF domain containing kinase 2                                                               | ADCK2                     | 0,72 |
| Src homology 2 domain containing adaptor protein B                                            | SHB                       | 0,72 |
| Zhang2013 ALT_ACCEPTOR, ALT_DONOR, coding, INTERNAL, intronic best transcript NM_001042576    | RRBP1                     | 0,72 |
| RAN binding protein 2                                                                         | RANBP2                    | 0,72 |
| reticulon 4 receptor                                                                          | RTN4R                     | 0,72 |
| forkhead box D4-like 6                                                                        | FOXD4L6                   | 0,71 |
| PRR5-ARHGAP8 readthrough                                                                      | PRR5-ARHGAP8              | 0,71 |
| calcium channel flower domain containing 1                                                    | CACFD1                    | 0,71 |
| family with sequence similarity 151, member B                                                 | FAM151B                   | 0,71 |
| surfeit 1                                                                                     | SURF1                     | 0,71 |
| aminopeptidase-like 1                                                                         | NPEPL1                    | 0,71 |
| leucine rich repeat containing 27                                                             | LRRC27                    | 0,71 |

|                                                                                                      |                                 |      |
|------------------------------------------------------------------------------------------------------|---------------------------------|------|
| claudin 20                                                                                           | CLDN20                          | 0,71 |
| mindbomb E3 ubiquitin protein ligase 2                                                               | MIB2                            | 0,71 |
| mitochondrial ribosomal protein S17                                                                  | MRPS17                          | 0,71 |
| Transcript Identified by AceView, Entrez Gene ID(s) 55619                                            | DOCK10                          | 0,71 |
| aminomethyltransferase; nicolin 1                                                                    | AMT; NICN1                      | 0,71 |
| exocyst complex component 3                                                                          | EXOC3                           | 0,71 |
| LETM1 domain containing 1                                                                            | LETMD1                          | 0,71 |
| leucine rich repeat containing 34                                                                    | LRRC34                          | 0,71 |
| proline-rich protein HaellI subfamily 2                                                              | PRH2                            | 0,71 |
| Bardet-Biedl syndrome 2                                                                              | BBS2                            | 0,71 |
| protocadherin beta 6                                                                                 | PCDHB6                          | 0,71 |
| leucine rich repeat containing 28                                                                    | LRRC28                          | 0,71 |
| transcription termination factor, RNA polymerase II                                                  | TTF2                            | 0,71 |
| collagen, type IV, alpha 2                                                                           | COL4A2                          | 0,71 |
| C7orf55-LUC7L2 readthrough; LUC7-like 2 pre-mRNA splicing factor; chromosome 7 open reading frame 55 | C7orf55-LUC7L2; LUC7L2; C7orf55 | 0,71 |
| zinc finger protein, FOG family member 1                                                             | ZFPM1                           | 0,71 |
| TYMS opposite strand                                                                                 | TYMSOS                          | 0,71 |
| ubiquinol-cytochrome c reductase binding protein                                                     | UQCRB                           | 0,71 |
| fer (fps/fes related) tyrosine kinase                                                                | FER                             | 0,71 |
| ZFP69 zinc finger protein                                                                            | ZFP69                           | 0,71 |
| gamma-aminobutyric acid (GABA) A receptor, rho 3 (gene/pseudogene)                                   | GABRR3                          | 0,71 |
| complexin 4                                                                                          | CPLX4                           | 0,71 |
| olfactory receptor, family 5, subfamily B, member 17                                                 | OR5B17                          | 0,71 |
| tripartite motif containing 24                                                                       | TRIM24                          | 0,71 |
| family with sequence similarity 181, member A                                                        | FAM181A                         | 0,71 |
| chromosome 5 open reading frame 46                                                                   | C5orf46                         | 0,71 |
| histidine triad nucleotide binding protein 2                                                         | HINT2                           | 0,71 |
| angiopoietin like 2                                                                                  | ANGPTL2                         | 0,71 |
| fibrillarin                                                                                          | FBL                             | 0,71 |
| nuclear pore complex interacting protein family, member A5                                           | NPIPA5                          | 0,71 |
| glutathione S-transferase omega 1                                                                    | GSTO1                           | 0,71 |
| ligase III, DNA, ATP-dependent                                                                       | LIG3                            | 0,71 |
| ribonuclease P/MRP 25kDa subunit-like                                                                | RPP25L                          | 0,71 |
| sortilin-related VPS10 domain containing receptor 3                                                  | SORCS3                          | 0,71 |
| solute carrier family 50 (sugar efflux transporter), member 1                                        | SLC50A1                         | 0,71 |
| growth factor, augments of liver regeneration                                                        | GFER                            | 0,71 |
| exportin 4                                                                                           | XPO4                            | 0,71 |
| RNA binding motif protein 43                                                                         | RBM43                           | 0,71 |
| K(lysine) acetyltransferase 6B                                                                       | KAT6B                           | 0,71 |

|                                                                                        |                         |      |
|----------------------------------------------------------------------------------------|-------------------------|------|
| Transcript Identified by AceView, Entrez Gene ID(s) 26064                              | RAI14                   | 0,71 |
| ADAMTS like 3                                                                          | ADAMTSL3                | 0,71 |
| peroxisomal biogenesis factor 10                                                       | PEX10                   | 0,71 |
| eukaryotic translation termination factor 1                                            | ETF1                    | 0,71 |
| brain expressed, associated with NEDD4, 1                                              | BEAN1                   | 0,71 |
| collagen beta(1-O)galactosyltransferase 1                                              | COLGALT1                | 0,71 |
| cysteine rich, DPF motif domain containing 1                                           | CDPF1                   | 0,71 |
| zinc finger protein 546                                                                | ZNF546                  | 0,71 |
| family with sequence similarity 174, member A                                          | FAM174A                 | 0,71 |
| BPI fold containing family B, member 6                                                 | BPIFB6                  | 0,71 |
| matrix-remodelling associated 5                                                        | MXRA5                   | 0,71 |
| nuclear pore complex interacting protein family, member A1                             | NPIPA1                  | 0,71 |
| ankyrin repeat domain 20 family, member A3; ankyrin repeat domain 20 family, member A2 | ANKRD20A3;<br>ANKRD20A2 | 0,71 |
| regulator of chromosome condensation 2                                                 | RCC2                    | 0,71 |
| family with sequence similarity 53, member C                                           | FAM53C                  | 0,71 |
| transmembrane protein 265; Snf2-related CREBBP activator protein                       | TMEM265; SRCAP          | 0,71 |
| Transcript Identified by AceView, Entrez Gene ID(s) 10371                              | SEMA3A                  | 0,71 |
| serpin peptidase inhibitor, clade I (neuroserpin), member 1                            | SERPINI1                | 0,71 |
| acyl-CoA synthetase bubbligum family member 2                                          | ACSBG2                  | 0,71 |
| tetratricopeptide repeat domain 17                                                     | TTC17                   | 0,71 |
| heart development protein with EGF-like domains 1                                      | HEG1                    | 0,71 |
| sorting nexin 22                                                                       | SNX22                   | 0,71 |
| ring finger protein 183                                                                | RNF183                  | 0,71 |
| olfactory receptor, family 10, subfamily K, member 2                                   | OR10K2                  | 0,71 |
| cutaneous T-cell lymphoma-associated antigen 1                                         | CTAGE1                  | 0,71 |
| microtubule associated serine/threonine kinase 3                                       | MAST3                   | 0,71 |
| calcium/calmodulin-dependent protein kinase II inhibitor 1                             | CAMK2N1                 | 0,71 |
| PGAM family member 5, serine/threonine protein phosphatase, mitochondrial              | PGAM5                   | 0,71 |
| ZFP36 ring finger protein-like 2                                                       | ZFP36L2                 | 0,71 |
| KIAA0319-like                                                                          | KIAA0319L               | 0,71 |
| sprouty RTK signaling antagonist 1                                                     | SPRY1                   | 0,71 |
| defensin, beta 128                                                                     | DEFB128                 | 0,71 |
| glycine N-methyltransferase                                                            | GNMT                    | 0,71 |
| SMG6 nonsense mediated mRNA decay factor                                               | SMG6                    | 0,71 |
| testis expressed 35                                                                    | TEX35                   | 0,71 |
| histone cluster 1, H1a                                                                 | HIST1H1A                | 0,71 |
| ribosomal protein L29                                                                  | RPL29                   | 0,71 |

|                                                                                           |          |      |
|-------------------------------------------------------------------------------------------|----------|------|
| zinc finger protein 550                                                                   | ZNF550   | 0,71 |
| cytochrome c oxidase subunit IV isoform 2 (lung)                                          | COX4I2   | 0,71 |
| TBC1 domain family, member 15                                                             | TBC1D15  | 0,71 |
| proline rich 4 (lacrimal)                                                                 | PRR4     | 0,71 |
| SMYD family member 5                                                                      | SMYD5    | 0,71 |
| Jeck2013 ALT_ACCEPTOR, ALT_DONOR, coding, INTERNAL, intronic best transcript NM_024524    | ATP13A3  | 0,71 |
| ArfGAP with GTPase domain, ankyrin repeat and PH domain 5                                 | AGAP5    | 0,71 |
| KDEL (Lys-Asp-Glu-Leu) endoplasmic reticulum protein retention receptor 3                 | KDELR3   | 0,71 |
| histone cluster 1, H3g                                                                    | HIST1H3G | 0,71 |
| SLIT-ROBO Rho GTPase activating protein 2                                                 | SRGAP2   | 0,71 |
| argonaute RISC catalytic component 1                                                      | ago-01   | 0,71 |
| Memczak2013 ANTISENSE, CDS, coding, INTERNAL best transcript NM_004946                    | DOCK2    | 0,71 |
| unc-50 homolog (C. elegans)                                                               | UNC50    | 0,71 |
| kinesin light chain 4                                                                     | KLC4     | 0,71 |
| Jeck2013 ANTISENSE, coding, INTERNAL, intronic best transcript NM_003380                  | VIM      | 0,71 |
| TRAF-interacting protein with forkhead-associated domain                                  | TIFA     | 0,71 |
| poly(A) binding protein, cytoplasmic 3                                                    | PABPC3   | 0,71 |
| chromobox homolog 7                                                                       | CBX7     | 0,71 |
| hydroxymethylbilane synthase                                                              | HMBS     | 0,71 |
| VPS29 retromer complex component                                                          | VPS29    | 0,71 |
| TAO kinase 3                                                                              | TAOK3    | 0,71 |
| nuclear transport factor 2-like export factor 1                                           | NXT1     | 0,71 |
| Memczak2013 ALT_ACCEPTOR, ALT_DONOR, coding, INTERNAL, intronic best transcript NM_006828 | ASCC3    | 0,71 |
| solute carrier family 30 (zinc transporter), member 5                                     | SLC30A5  | 0,71 |
| guanine monophosphate synthase                                                            | GMPS     | 0,71 |
| dual specificity phosphatase 16                                                           | DUSP16   | 0,71 |
| tankyrase, TRF1-interacting ankyrin-related ADP-ribose polymerase                         | TNKS     | 0,71 |
| ALG2, alpha-1,3/1,6-mannosyltransferase                                                   | ALG2     | 0,71 |
| CCR4-NOT transcription complex subunit 8                                                  | CNOT8    | 0,71 |
| heat shock 60kDa protein 1 (chaperonin)                                                   | HSPD1    | 0,71 |
| lactate dehydrogenase A                                                                   | LDHA     | 0,71 |
| family with sequence similarity 124 member A                                              | FAM124A  | 0,71 |
| LEM domain containing 3                                                                   | LEMD3    | 0,71 |
| nucleoporin 188kDa                                                                        | NUP188   | 0,71 |
| chromosome 16 open reading frame 87                                                       | C16orf87 | 0,71 |
| WD repeat domain 5                                                                        | WDR5     | 0,71 |
| zinc finger protein, FOG family member 2                                                  | ZFPM2    | 0,71 |

|                                                                                                        |                           |      |
|--------------------------------------------------------------------------------------------------------|---------------------------|------|
| anoctamin 3                                                                                            | ANO3                      | 0,71 |
| RANBP2-like and GRIP domain containing 8; RANBP2-like and GRIP domain containing 6                     | RGPD8; RGPD6              | 0,71 |
| LIM domain only 2 (rhombotin-like 1)                                                                   | LMO2                      | 0,71 |
| signal recognition particle receptor, B subunit                                                        | SRPRB                     | 0,71 |
| N-acetylglucosamine-1-phosphate transferase, alpha and beta subunits                                   | GNPTAB                    | 0,71 |
| RB-associated KRAB zinc finger; RBAK-RBAKDN readthrough; RBAK downstream neighbor (non-protein coding) | RBAK; RBAK-RBAKDN; RBAKDN | 0,71 |
| family with sequence similarity 168, member B                                                          | FAM168B                   | 0,70 |
| autism susceptibility candidate 2                                                                      | AUTS2                     | 0,70 |
| sperm associated antigen 17                                                                            | SPAG17                    | 0,70 |
| G protein-coupled receptor 141                                                                         | GPR141                    | 0,70 |
| C-terminal binding protein 2                                                                           | CTBP2                     | 0,70 |
| thymidylate synthetase                                                                                 | TYMS                      | 0,70 |
| carboxypeptidase E                                                                                     | CPE                       | 0,70 |
| F-box and leucine-rich repeat protein 12                                                               | FBXL12                    | 0,70 |
| TBC1 domain family, member 3G                                                                          | TBC1D3G                   | 0,70 |
| CD93 molecule                                                                                          | CD93                      | 0,70 |
| LYR motif containing 5                                                                                 | LYRM5                     | 0,70 |
| zinc finger, DHHC-type containing 19                                                                   | ZDHHC19                   | 0,70 |
| erythroid differentiation regulatory factor 1                                                          | EDRF1                     | 0,70 |
| microtubule associated protein tau                                                                     | MAPT                      | 0,70 |
| RANBP2-like and GRIP domain containing 3                                                               | RGPD3                     | 0,70 |
| TNFAIP3 interacting protein 3                                                                          | TNIP3                     | 0,70 |
| translocation associated membrane protein 1                                                            | TRAM1                     | 0,70 |
| olfactory receptor, family 2, subfamily M, member 7                                                    | OR2M7                     | 0,70 |
| ribosomal protein L35a                                                                                 | RPL35A                    | 0,70 |
| olfactory receptor, family 14, subfamily J, member 1                                                   | OR14J1                    | 0,70 |
| cytosolic iron-sulfur assembly component 1                                                             | CIAO1                     | 0,70 |
| N-myristoyltransferase 2                                                                               | NMT2                      | 0,70 |
| troponin I type 2 (skeletal, fast)                                                                     | TNNI2                     | 0,70 |
| ribosomal protein L23; small nucleolar RNA, H/ACA box 21                                               | RPL23; SNORA21            | 0,70 |
| regulator of G-protein signaling 18                                                                    | RGS18                     | 0,70 |
| zinc finger protein 396                                                                                | ZNF396                    | 0,70 |
| transducin (beta)-like 1, Y-linked                                                                     | TBL1Y                     | 0,70 |
| Kv channel interacting protein 2                                                                       | KCNIP2                    | 0,70 |
| zinc finger protein 277                                                                                | ZNF277                    | 0,70 |
| QKI, KH domain containing, RNA binding                                                                 | QKI                       | 0,70 |
| family with sequence similarity 134, member C                                                          | FAM134C                   | 0,70 |
| chromosome 7 open reading frame 49                                                                     | C7orf49                   | 0,70 |
| phospholipid scramblase 1                                                                              | PLSCR1                    | 0,70 |
| zinc finger protein 780A                                                                               | ZNF780A                   | 0,70 |

|                                                                                                          |              |      |
|----------------------------------------------------------------------------------------------------------|--------------|------|
| eukaryotic translation initiation factor 3, subunit J                                                    | EIF3J        | 0,70 |
| glutamate receptor, ionotropic, N-methyl D-aspartate 2B                                                  | GRIN2B       | 0,70 |
| RAB15 effector protein                                                                                   | REP15        | 0,70 |
| retinol binding protein 2, cellular                                                                      | RBP2         | 0,70 |
| dedicator of cytokinesis 7                                                                               | DOCK7        | 0,70 |
| SRSF protein kinase 1                                                                                    | SRPK1        | 0,70 |
| thymocyte nuclear protein 1                                                                              | THYN1        | 0,70 |
| TBC1 domain family, member 8 (with GRAM domain)                                                          | TBC1D8       | 0,70 |
| Ly1 antibody reactive                                                                                    | LYAR         | 0,70 |
| ADAM metallopeptidase with thrombospondin type 1 motif 13                                                | ADAMTS13     | 0,70 |
| cadherin-related family member 1                                                                         | CDHR1        | 0,70 |
| Ral GTPase activating protein, alpha subunit 2 (catalytic)                                               | RALGAPA2     | 0,70 |
| lymphocyte antigen 6 complex, locus H                                                                    | LY6H         | 0,70 |
| Fas-activated serine/threonine kinase                                                                    | FASTK        | 0,70 |
| zinc finger, RAN-binding domain containing 1                                                             | ZRANB1       | 0,70 |
| integrin, beta 2 (complement component 3 receptor 3 and 4 subunit)                                       | ITGB2        | 0,70 |
| dedicator of cytokinesis 3                                                                               | DOCK3        | 0,70 |
| MAD2 mitotic arrest deficient-like 2 (yeast)                                                             | MAD2L2       | 0,70 |
| chromosome 1 open reading frame 198                                                                      | C1orf198     | 0,70 |
| histone cluster 1, H2ak                                                                                  | HIST1H2AK    | 0,70 |
| cancer/testis antigen 1B                                                                                 | CTAG1B       | 0,70 |
| heterogeneous nuclear ribonucleoprotein F                                                                | HNRNPF       | 0,70 |
| signal recognition particle 19kDa; zinc finger (CCCH type), RNA binding motif and serine/arginine rich 1 | SRP19; ZRSR1 | 0,70 |
| zinc finger protein 658                                                                                  | ZNF658       | 0,70 |
| exocyst complex component 4                                                                              | EXOC4        | 0,70 |
| zinc finger and BTB domain containing 33                                                                 | ZBTB33       | 0,70 |
| Transcript Identified by AceView, Entrez Gene ID(s) 130507                                               | UBR3         | 0,70 |
| eukaryotic translation initiation factor 2B, subunit 5 epsilon, 82kDa                                    | EIF2B5       | 0,70 |
| PC4 and SFRS1 interacting protein 1                                                                      | PSIP1        | 0,70 |
| zinc activated ligand-gated ion channel                                                                  | ZACN         | 0,70 |
| nuclear receptor coactivator 1                                                                           | NCOA1        | 0,70 |
| Zhang2013 ALT_ACCEPTOR, ALT_DONOR, coding, INTERNAL, intronic, OVERLAPTX best transcript NM_017623       | CNNM3        | 0,70 |
| chromosome 11 open reading frame 57                                                                      | C11orf57     | 0,70 |
| NCK adaptor protein 2                                                                                    | NCK2         | 0,70 |
| Transcript Identified by AceView, Entrez Gene ID(s) 85444                                                | LRRCC1       | 0,70 |



|                                                                                                                                                                               |                                 |      |
|-------------------------------------------------------------------------------------------------------------------------------------------------------------------------------|---------------------------------|------|
| zinc finger protein 443                                                                                                                                                       | ZNF443                          | 0,70 |
| uncharacterized LOC654841; Salzman2013 ANTISENSE, CDS, coding, INTERNAL, intronic, OVCODE, OVERLAPTX, OVEXON best transcript NM_000091; novel transcript, antisense to COL4A3 | LOC654841; AC097662.2; COL4A3   | 0,70 |
| Transcript Identified by AceView, Entrez Gene ID(s) 54556                                                                                                                     | ING3                            | 0,70 |
| mirror-image polydactyly 1                                                                                                                                                    | MIPOL1                          | 0,70 |
| tumor necrosis factor receptor superfamily, member 11a, NFKB activator                                                                                                        | TNFRSF11A                       | 0,70 |
| leucine rich repeat containing 1                                                                                                                                              | LRRC1                           | 0,70 |
| ER degradation enhancer, mannosidase alpha-like 2                                                                                                                             | EDEM2                           | 0,70 |
| heterogeneous nuclear ribonucleoprotein U-like 2                                                                                                                              | HNRNPUL2                        | 0,70 |
| M-phase phosphoprotein 8                                                                                                                                                      | MPHOSPH8                        | 0,70 |
| ORAI calcium release-activated calcium modulator 3                                                                                                                            | ORAI3                           | 0,70 |
| RAB11B, member RAS oncogene family                                                                                                                                            | RAB11B                          | 0,70 |
| protein phosphatase 1, regulatory subunit 12B                                                                                                                                 | PPP1R12B                        | 0,70 |
| Transcript Identified by AceView, Entrez Gene ID(s) 998                                                                                                                       | CDC42                           | 0,70 |
| mediator complex subunit 12                                                                                                                                                   | MED12                           | 0,70 |
| arylsulfatase B                                                                                                                                                               | ARSB                            | 0,70 |
| trimethyllysine hydroxylase, epsilon                                                                                                                                          | TMLHE                           | 0,70 |
| Zhang2013 ALT_ACCEPTOR, ALT_DONOR, coding, INTERNAL, intronic best transcript NM_058230                                                                                       | ZNF354B                         | 0,70 |
| mitochondrial ribosomal protein L40                                                                                                                                           | MRPL40                          | 0,70 |
| cornulin                                                                                                                                                                      | CRNN                            | 0,70 |
| ribosomal protein S25                                                                                                                                                         | RPS25                           | 0,70 |
| coiled-coil domain containing 126                                                                                                                                             | CCDC126                         | 0,70 |
| transmembrane p24 trafficking protein 4                                                                                                                                       | TMED4                           | 0,70 |
| cystathionine gamma-lyase                                                                                                                                                     | CTH                             | 0,70 |
| PHD finger protein 2                                                                                                                                                          | PHF2                            | 0,70 |
| DnaJ (Hsp40) homolog, subfamily C , member 25                                                                                                                                 | DNAJC25                         | 0,70 |
| inositol hexakisphosphate kinase 2                                                                                                                                            | IP6K2                           | 0,70 |
| membrane associated guanylate kinase, WW and PDZ domain containing 1                                                                                                          | MAGI1                           | 0,70 |
| cytochrome b561                                                                                                                                                               | CYB561                          | 0,70 |
| pre-mRNA processing factor 38B                                                                                                                                                | PRPF38B                         | 0,70 |
| glutamate rich 3                                                                                                                                                              | ERICH3                          | 0,70 |
| etoposide induced 2.4                                                                                                                                                         | EI24                            | 0,70 |
| Nedd4 family interacting protein 2                                                                                                                                            | NDFIP2                          | 0,70 |
| nascent polypeptide-associated complex alpha subunit 2                                                                                                                        | NACA2                           | 0,70 |
| TSEN34 tRNA splicing endonuclease subunit                                                                                                                                     | TSEN34                          | 0,70 |
| chromosome 9 open reading frame 3; microRNA 24-1; microRNA 23b; microRNA 27b                                                                                                  | C9orf3; MIR24-1; MIR23B; MIR27B | 0,70 |
| zinc finger protein 70                                                                                                                                                        | ZNF70                           | 0,70 |

|                                                                                                           |          |      |
|-----------------------------------------------------------------------------------------------------------|----------|------|
| phosphatidylinositol glycan anchor biosynthesis class P                                                   | PIGP     | 0,70 |
| major histocompatibility complex, class I, E                                                              | HLA-E    | 0,70 |
| inositol polyphosphate-5-phosphatase F                                                                    | INPP5F   | 0,70 |
| solute carrier family 26 (anion exchanger), member 3                                                      | SLC26A3  | 0,70 |
| ArfGAP with RhoGAP domain, ankyrin repeat and PH domain 2                                                 | ARAP2    | 0,70 |
| olfactory receptor, family 12, subfamily D, member 1 (gene/pseudogene) [Source:HGNC Symbol;Acc:HGNC:8177] | OR12D1   | 0,70 |
| poly-U binding splicing factor 60KDa                                                                      | PUF60    | 0,70 |
| zinc finger protein 780B                                                                                  | ZNF780B  | 0,70 |
| capicua transcriptional repressor                                                                         | CIC      | 0,70 |
| ribosomal protein L7                                                                                      | RPL7     | 0,70 |
| tubby bipartite transcription factor                                                                      | TUB      | 0,70 |
| solute carrier family 25 (mitochondrial carnitine/acylcarnitine carrier), member 29                       | SLC25A29 | 0,70 |
| retinol dehydrogenase 13 (all-trans/9-cis)                                                                | RDH13    | 0,70 |
| DNA cross-link repair 1A                                                                                  | DCLRE1A  | 0,70 |
| Zhang2013 ALT_ACCEPTOR, ALT_DONOR, coding, INTERNAL, intronic best transcript NM_003086                   | SNAPC4   | 0,70 |
| cyclin C                                                                                                  | CCNC     | 0,70 |
| family with sequence similarity 217, member B                                                             | FAM217B  | 0,70 |
| glycerol kinase 5 (putative)                                                                              | GK5      | 0,70 |
| BRCA1 associated RING domain 1                                                                            | BARD1    | 0,70 |
| caseinolytic mitochondrial matrix peptidase chaperone subunit                                             | CLPX     | 0,70 |
| protein inhibitor of activated STAT 4                                                                     | PIAS4    | 0,70 |
| 4-aminobutyrate aminotransferase                                                                          | ABAT     | 0,70 |
| fem-1 homolog a (C. elegans)                                                                              | FEM1A    | 0,70 |
| tryptophanyl tRNA synthetase 2, mitochondrial                                                             | WARS2    | 0,70 |
| ubiquitin specific peptidase 1                                                                            | USP1     | 0,70 |
| phospholipid scramblase 2                                                                                 | PLSCR2   | 0,70 |
| taperin                                                                                                   | TPRN     | 0,70 |
| glutamate receptor, metabotropic 2                                                                        | GRM2     | 0,70 |
| Memczak2013 ALT_ACCEPTOR, ALT_DONOR, coding, INTERNAL, intronic best transcript NM_002919                 | RFX3     | 0,70 |
| C-type lectin domain family 18, member B                                                                  | CLEC18B  | 0,70 |
| fucosyltransferase 3 (galactoside 3(4)-L-fucosyltransferase, Lewis blood group)                           | FUT3     | 0,70 |
| dipeptidyl-peptidase 8                                                                                    | DPP8     | 0,70 |
| signal sequence receptor, alpha                                                                           | SSR1     | 0,70 |
| kelch-like family member 23                                                                               | KLHL23   | 0,70 |
| glutamate receptor, metabotropic 6                                                                        | GRM6     | 0,70 |
| zinc finger protein 639                                                                                   | ZNF639   | 0,70 |

|                                                                                              |                       |      |
|----------------------------------------------------------------------------------------------|-----------------------|------|
| Memczak2013 ANTISENSE, CDS, coding, INTERNAL best transcript NM_145295                       | ZNF627                | 0,70 |
| solute carrier family 26 (anion exchanger), member 8                                         | SLC26A8               | 0,70 |
| Transcript Identified by AceView, Entrez Gene ID(s) 23122                                    | CLASP2                | 0,70 |
| SFT2 domain containing 1                                                                     | SFT2D1                | 0,70 |
| CREB regulated transcription coactivator 3                                                   | CRTC3                 | 0,70 |
| salt-inducible kinase 2                                                                      | SIK2                  | 0,70 |
| TSEN54 tRNA splicing endonuclease subunit                                                    | TSEN54                | 0,70 |
| DnaJ (Hsp40) homolog, subfamily C, member 9                                                  | DNAJC9                | 0,69 |
| intermediate filament family orphan 2                                                        | IFFO2                 | 0,69 |
| PIGB opposite strand 1; RAB27A, member RAS oncogene family                                   | PIGBOS1;<br>RAB27A    | 0,69 |
| Transcript Identified by AceView, Entrez Gene ID(s) 10426                                    | TUBGCP3               | 0,69 |
| HID1 domain containing                                                                       | HID1                  | 0,69 |
| chromosome 9 open reading frame 116                                                          | C9orf116              | 0,69 |
| ring finger protein 1                                                                        | RING1                 | 0,69 |
| Transcript Identified by AceView, Entrez Gene ID(s) 10363                                    | HMG20A                | 0,69 |
| coatomer protein complex subunit gamma 1                                                     | COPG1                 | 0,69 |
| high mobility group nucleosomal binding domain 4                                             | HMGN4                 | 0,69 |
| tachykinin 3                                                                                 | TAC3                  | 0,69 |
| PHD finger protein 10                                                                        | PHF10                 | 0,69 |
| structural maintenance of chromosomes 3                                                      | SMC3                  | 0,69 |
| Memczak2013 ANTISENSE, coding, INTERNAL, intronic best transcript NM_014371; TEC             | AC006128.2;<br>AKAP8L | 0,69 |
| ribosomal protein S20; small nucleolar RNA, C/D box 54                                       | RPS20; SNORD54        | 0,69 |
| chromosome 1 open reading frame 116                                                          | C1orf116              | 0,69 |
| nucleolar protein 7                                                                          | NOL7                  | 0,69 |
| solute carrier family 10 (sodium/bile acid cotransporter), member 2                          | SLC10A2               | 0,69 |
| coiled-coil domain containing 34                                                             | CCDC34                | 0,69 |
| WAS protein family, member 1                                                                 | WASF1                 | 0,69 |
| v-ets avian erythroblastosis virus E26 oncogene homolog 2                                    | ETS2                  | 0,69 |
| Memczak2013 ALT_ACCEPTOR, ALT_DONOR, coding, INTERNAL, intronic best transcript NM_001163435 | TBCK                  | 0,69 |
| ring finger protein 121                                                                      | RNF121                | 0,69 |
| trypsin domain containing 1                                                                  | TYSND1                | 0,69 |
| retinoblastoma 1                                                                             | RB1                   | 0,69 |
| aquaporin 6, kidney specific                                                                 | AQP6                  | 0,69 |
| leucine rich repeat containing 19                                                            | LRRC19                | 0,69 |
| aryl hydrocarbon receptor interacting protein                                                | AIP                   | 0,69 |
| inhibin alpha                                                                                | INHA                  | 0,69 |

|                                                                                                                                                                                                                                                              |                                          |      |
|--------------------------------------------------------------------------------------------------------------------------------------------------------------------------------------------------------------------------------------------------------------|------------------------------------------|------|
| serine/threonine kinase 16                                                                                                                                                                                                                                   | STK16                                    | 0,69 |
| GTF2I repeat domain containing 2B                                                                                                                                                                                                                            | GTF2IRD2B                                | 0,69 |
| uncharacterized LOC101928161; Salzman2013 ANTISENSE, coding, INTERNAL, intronic, OVERLAPTX best transcript NM_207363; novel transcript, antisense to NCKAP5; Transcript Identified by AceView                                                                | LOC101928161; AC010890.1; NCKAP5; spawfa | 0,69 |
| heterogeneous nuclear ribonucleoprotein A1 pseudogene 33; long intergenic non-protein coding RNA 842; annexin A8-like 1                                                                                                                                      | HNRNPA1P33; LINC00842; ANXA8L1           | 0,69 |
| family with sequence similarity 98, member A                                                                                                                                                                                                                 | FAM98A                                   | 0,69 |
| G protein-coupled receptor 179                                                                                                                                                                                                                               | GPR179                                   | 0,69 |
| olfactory receptor, family 2, subfamily T, member 29                                                                                                                                                                                                         | OR2T29                                   | 0,69 |
| uncharacterized LOC643355; putative novel transcript; Transcript Identified by AceView                                                                                                                                                                       | LOC643355; RP11-88H9.2; toyfawbu         | 0,69 |
| spectrin, beta, non-erythrocytic 4                                                                                                                                                                                                                           | SPTBN4                                   | 0,69 |
| adenylosuccinate synthase like 1                                                                                                                                                                                                                             | ADSSL1                                   | 0,69 |
| serine/arginine-rich splicing factor 1                                                                                                                                                                                                                       | SRSF1                                    | 0,69 |
| ArfGAP with GTPase domain, ankyrin repeat and PH domain 1                                                                                                                                                                                                    | AGAP1                                    | 0,69 |
| H2A histone family, member Y                                                                                                                                                                                                                                 | H2AFY                                    | 0,69 |
| phosphoglycerate mutase 1 (brain)                                                                                                                                                                                                                            | PGAM1                                    | 0,69 |
| disrupted in renal carcinoma 3                                                                                                                                                                                                                               | DIRC3                                    | 0,69 |
| ATPase, class II, type 9B                                                                                                                                                                                                                                    | ATP9B                                    | 0,69 |
| Homo sapiens DiGeorge syndrome critical region gene 6 (DGCR6), mRNA.; protein DGCR6; Homo sapiens DiGeorge syndrome critical region gene 6, mRNA (cDNA clone MGC:54086 IMAGE:5229172), complete cds.; Protein DGCR6 [Source:UniProtKB/Swiss-Prot;Acc:Q14129] | DGCR6; LOC102724770                      | 0,69 |
| adenosylmethionine decarboxylase 1                                                                                                                                                                                                                           | AMD1                                     | 0,69 |
| interferon-related developmental regulator 2                                                                                                                                                                                                                 | IFRD2                                    | 0,69 |
| excision repair cross-complementation group 8                                                                                                                                                                                                                | ERCC8                                    | 0,69 |
| transmembrane protein 101                                                                                                                                                                                                                                    | TMEM101                                  | 0,69 |
| mitochondrial ribosomal protein L51                                                                                                                                                                                                                          | MRPL51                                   | 0,69 |
| TSPY-like 1                                                                                                                                                                                                                                                  | TSPYL1                                   | 0,69 |
| ubiquitin specific peptidase 9, X-linked                                                                                                                                                                                                                     | USP9X                                    | 0,69 |
| transmembrane protein 74B                                                                                                                                                                                                                                    | TMEM74B                                  | 0,69 |
| spen family transcriptional repressor                                                                                                                                                                                                                        | SPEN                                     | 0,69 |
| septin 2                                                                                                                                                                                                                                                     | sept-02                                  | 0,69 |
| KIAA0895-like                                                                                                                                                                                                                                                | KIAA0895L                                | 0,69 |
| zinc finger protein 566                                                                                                                                                                                                                                      | ZNF566                                   | 0,69 |
| rearranged L-myc fusion                                                                                                                                                                                                                                      | RLF                                      | 0,69 |
| NADH dehydrogenase (ubiquinone) 1 alpha subcomplex, 5                                                                                                                                                                                                        | NDUFA5                                   | 0,69 |
| ribosomal protein S3; small nucleolar RNA, C/D box 15A                                                                                                                                                                                                       | RPS3; SNORD15A                           | 0,69 |
| eukaryotic translation initiation factor 1A, Y-linked                                                                                                                                                                                                        | EIF1AY                                   | 0,69 |

|                                                                                                                                                                                                                                                                                                                                                                                                                                                                                                                                                                                                                                                                                                                                                                                                                                                                                                     |                 |      |
|-----------------------------------------------------------------------------------------------------------------------------------------------------------------------------------------------------------------------------------------------------------------------------------------------------------------------------------------------------------------------------------------------------------------------------------------------------------------------------------------------------------------------------------------------------------------------------------------------------------------------------------------------------------------------------------------------------------------------------------------------------------------------------------------------------------------------------------------------------------------------------------------------------|-----------------|------|
| Transcript Identified by AceView, Entrez Gene ID(s) 64062                                                                                                                                                                                                                                                                                                                                                                                                                                                                                                                                                                                                                                                                                                                                                                                                                                           | RBM26           | 0,69 |
| Parkinson disease 7 domain containing 1                                                                                                                                                                                                                                                                                                                                                                                                                                                                                                                                                                                                                                                                                                                                                                                                                                                             | PDDC1           | 0,69 |
| Memczak2013 ANTISENSE, CDS, coding, INTERNAL best transcript NM_001127491                                                                                                                                                                                                                                                                                                                                                                                                                                                                                                                                                                                                                                                                                                                                                                                                                           | ITGB2           | 0,69 |
| transmembrane protein 201                                                                                                                                                                                                                                                                                                                                                                                                                                                                                                                                                                                                                                                                                                                                                                                                                                                                           | TMEM201         | 0,69 |
| sulfatase 2                                                                                                                                                                                                                                                                                                                                                                                                                                                                                                                                                                                                                                                                                                                                                                                                                                                                                         | SULF2           | 0,69 |
| solute carrier family 9, subfamily A (NHE6, cation proton antiporter 6), member 6                                                                                                                                                                                                                                                                                                                                                                                                                                                                                                                                                                                                                                                                                                                                                                                                                   | SLC9A6          | 0,69 |
| Homo sapiens phosphoglycerate mutase 1 (brain), mRNA (cDNA clone MGC:8462 IMAGE:2821567), complete cds.;<br>Homo sapiens phosphoglycerate mutase 1 (brain), mRNA (cDNA clone MGC:19732 IMAGE:3604026), complete cds.;<br>Homo sapiens phosphoglycerate mutase 1 (brain), mRNA (cDNA clone MGC:15086 IMAGE:4299008), complete cds.;<br>Homo sapiens phosphoglycerate mutase 1 (brain), mRNA (cDNA clone MGC:61519 IMAGE:5787678), complete cds.;<br>Homo sapiens phosphoglycerate mutase 1 (brain), mRNA (cDNA clone MGC:71323 IMAGE:6584466), complete cds.;<br>Homo sapiens phosphoglycerate mutase 1 (brain), mRNA (cDNA clone MGC:87445 IMAGE:5262935), complete cds.;<br>Homo sapiens phosphoglycerate mutase 1 (brain), mRNA (cDNA clone MGC:88744 IMAGE:6297173), complete cds.;<br>Homo sapiens phosphoglycerate mutase 1 (brain), mRNA (cDNA clone MGC:189702 IMAGE:8862699), complete cds. | PGAM1           | 0,69 |
| acidic nuclear phosphoprotein 32 family member C                                                                                                                                                                                                                                                                                                                                                                                                                                                                                                                                                                                                                                                                                                                                                                                                                                                    | ANP32C          | 0,69 |
| zinc finger protein 546                                                                                                                                                                                                                                                                                                                                                                                                                                                                                                                                                                                                                                                                                                                                                                                                                                                                             | ZNF546          | 0,69 |
| transmembrane protein 255A                                                                                                                                                                                                                                                                                                                                                                                                                                                                                                                                                                                                                                                                                                                                                                                                                                                                          | TMEM255A        | 0,69 |
| cytochrome c oxidase subunit IV isoform 1                                                                                                                                                                                                                                                                                                                                                                                                                                                                                                                                                                                                                                                                                                                                                                                                                                                           | COX4I1          | 0,69 |
| spermatogenesis associated 1                                                                                                                                                                                                                                                                                                                                                                                                                                                                                                                                                                                                                                                                                                                                                                                                                                                                        | SPATA1          | 0,69 |
| Transcript Identified by AceView, Entrez Gene ID(s) 5108                                                                                                                                                                                                                                                                                                                                                                                                                                                                                                                                                                                                                                                                                                                                                                                                                                            | PCM1            | 0,69 |
| polycomb group ring finger 3                                                                                                                                                                                                                                                                                                                                                                                                                                                                                                                                                                                                                                                                                                                                                                                                                                                                        | PCGF3           | 0,69 |
| DDB1 and CUL4 associated factor 10                                                                                                                                                                                                                                                                                                                                                                                                                                                                                                                                                                                                                                                                                                                                                                                                                                                                  | DCAF10          | 0,69 |
| natriuretic peptide receptor 3                                                                                                                                                                                                                                                                                                                                                                                                                                                                                                                                                                                                                                                                                                                                                                                                                                                                      | NPR3            | 0,69 |
| striatin, calmodulin binding protein 4                                                                                                                                                                                                                                                                                                                                                                                                                                                                                                                                                                                                                                                                                                                                                                                                                                                              | STRN4           | 0,69 |
| diacylglycerol kinase, delta 130kDa                                                                                                                                                                                                                                                                                                                                                                                                                                                                                                                                                                                                                                                                                                                                                                                                                                                                 | DGKD            | 0,69 |
| afamin                                                                                                                                                                                                                                                                                                                                                                                                                                                                                                                                                                                                                                                                                                                                                                                                                                                                                              | AFM             | 0,69 |
| ALG1, chitobiosyldiphosphodolichol beta-mannosyltransferase; NAGPA antisense RNA 1                                                                                                                                                                                                                                                                                                                                                                                                                                                                                                                                                                                                                                                                                                                                                                                                                  | ALG1; NAGPA-AS1 | 0,69 |
| ribosomal protein S6 kinase, 52kDa, polypeptide 1                                                                                                                                                                                                                                                                                                                                                                                                                                                                                                                                                                                                                                                                                                                                                                                                                                                   | RPS6KC1         | 0,69 |
| calreticulin                                                                                                                                                                                                                                                                                                                                                                                                                                                                                                                                                                                                                                                                                                                                                                                                                                                                                        | CALR            | 0,69 |

|                                                                                                            |                              |      |
|------------------------------------------------------------------------------------------------------------|------------------------------|------|
| leucine rich repeat containing 37B                                                                         | LRRC37B                      | 0,69 |
| NIN1/RPN12 binding protein 1 homolog                                                                       | NOB1                         | 0,69 |
| upstream transcription factor 1                                                                            | USF1                         | 0,69 |
| olfactory receptor, family 2, subfamily AK, member 2                                                       | OR2AK2                       | 0,69 |
| uncharacterized LOC100130357; novel transcript,<br>antisense to PHACTR1                                    | LOC100130357;<br>RP1-257A7.4 | 0,69 |
| glutathione peroxidase 2                                                                                   | GPX2                         | 0,69 |
| ARV1 homolog, fatty acid homeostasis modulator                                                             | ARV1                         | 0,69 |
| prolyl 4-hydroxylase, beta polypeptide                                                                     | P4HB                         | 0,69 |
| solute carrier family 2 (facilitated glucose transporter),<br>member 6 [Source:HGNC Symbol;Acc:HGNC:11011] | SLC2A6                       | 0,69 |
| nicastrin                                                                                                  | NCSTN                        | 0,69 |
| collagen, type XV, alpha 1                                                                                 | COL15A1                      | 0,69 |
| diphosphoinositol pentakisphosphate kinase 2                                                               | PPIP5K2                      | 0,69 |
| NUF2, NDC80 kinetochore complex component                                                                  | NUF2                         | 0,69 |
| zinc finger protein 747                                                                                    | ZNF747                       | 0,69 |
| Transcript Identified by AceView, Entrez Gene ID(s) 8502                                                   | PKP4                         | 0,69 |
| pancreatic lipase-related protein 2                                                                        | PNLIPRP2                     | 0,69 |
| aconitase 1, soluble                                                                                       | ACO1                         | 0,69 |
| stromal antigen 1                                                                                          | STAG1                        | 0,69 |
| histidine triad nucleotide binding protein 3                                                               | HINT3                        | 0,69 |
| transmembrane protein 70; ribosomal protein S20<br>pseudogene 21                                           | TMEM70;<br>RPS20P21          | 0,69 |
| zinc finger and BTB domain containing 7B                                                                   | ZBTB7B                       | 0,69 |
| pumilio RNA binding family member 2                                                                        | PUM2                         | 0,69 |
| BCL2-associated athanogene                                                                                 | BAG1                         | 0,69 |
| CCR4-NOT transcription complex subunit 2                                                                   | CNOT2                        | 0,69 |
| HESX homeobox 1                                                                                            | HESX1                        | 0,69 |
| Transcript Identified by AceView, Entrez Gene ID(s) 23126                                                  | POGZ                         | 0,69 |
| La ribonucleoprotein domain family, member 1B                                                              | LARP1B                       | 0,69 |
| GATA zinc finger domain containing 1                                                                       | GATAD1                       | 0,69 |
| YLP motif containing 1                                                                                     | YLPM1                        | 0,69 |
| keratin associated protein 10-7; keratin associated<br>protein 10-8                                        | KRTAP10-7;<br>KRTAP10-8      | 0,69 |
| transmembrane protein 184A                                                                                 | TMEM184A                     | 0,69 |
| SH3 and SYLF domain containing 1                                                                           | SH3YL1                       | 0,69 |
| LysM, putative peptidoglycan-binding, domain containing<br>4                                               | LYSMD4                       | 0,69 |
| replication initiator 1                                                                                    | REPIN1                       | 0,69 |
| exosome component 4; microRNA 6847                                                                         | EXOSC4; MIR6847              | 0,69 |
| procollagen-lysine, 2-oxoglutarate 5-dioxygenase 3                                                         | PLOD3                        | 0,69 |

|                                                                                                                                                                                   |                 |      |
|-----------------------------------------------------------------------------------------------------------------------------------------------------------------------------------|-----------------|------|
| translocase of outer mitochondrial membrane 70 homolog A ( <i>S. cerevisiae</i> )                                                                                                 | TOMM70A         | 0,69 |
| ATPase family, AAA domain containing 3A                                                                                                                                           | ATAD3A          | 0,68 |
| polypeptide N-acetylgalactosaminyltransferase 2                                                                                                                                   | GALNT2          | 0,68 |
| transmembrane 9 superfamily member 1                                                                                                                                              | TM9SF1          | 0,68 |
| ribosomal protein S27a                                                                                                                                                            | RPS27A          | 0,68 |
| nuclear factor related to kappaB binding protein                                                                                                                                  | NFRKB           | 0,68 |
| Salzman2013 ANNOTATED, CDS, coding, INTERNAL, OVCODE, OVEXON best transcript NM_001190810; centaurin, gamma-like family, member 11 pseudogene [Source:HGNC Symbol;Acc:HGNC:23660] | AGAP9; CTGLF11P | 0,68 |
| FGFR1 oncogene partner 2                                                                                                                                                          | FGFR1OP2        | 0,68 |
| nicotinamide nucleotide adenyllyltransferase 3                                                                                                                                    | NMNAT3          | 0,68 |
| runt-related transcription factor 1                                                                                                                                               | RUNX1           | 0,68 |
| ATP binding cassette subfamily C member 5                                                                                                                                         | ABCC5           | 0,68 |
| ATPase, class VI, type 11B                                                                                                                                                        | ATP11B          | 0,68 |
| speckle-type POZ protein                                                                                                                                                          | SPOP            | 0,68 |
| damage-specific DNA binding protein 1                                                                                                                                             | DDB1            | 0,68 |
| ankyrin repeat domain 36B                                                                                                                                                         | ANKRD36B        | 0,68 |
| scaffold attachment factor B                                                                                                                                                      | SAFB            | 0,68 |
| elastin microfibril interfacer 1                                                                                                                                                  | EMILIN1         | 0,68 |
| protocadherin beta 2                                                                                                                                                              | PCDHB2          | 0,68 |
| forkhead box O1                                                                                                                                                                   | FOXO1           | 0,68 |
| synapse defective 1, Rho GTPase, homolog 2 ( <i>C. elegans</i> )                                                                                                                  | SYDE2           | 0,68 |
| multimerin 1                                                                                                                                                                      | MMRN1           | 0,68 |
| olfactory receptor, family 8, subfamily G, member 2                                                                                                                               | OR8G2           | 0,68 |
| G protein-coupled receptor kinase 4                                                                                                                                               | GRK4            | 0,68 |
| Ets2 repressor factor                                                                                                                                                             | ERF             | 0,68 |
| keratinocyte differentiation factor 1                                                                                                                                             | KDF1            | 0,68 |
| CTBP1 antisense RNA 2 (head to head)                                                                                                                                              | CTBP1-AS2       | 0,68 |
| serologically defined colon cancer antigen 3                                                                                                                                      | SDCCAG3         | 0,68 |
| occludin/ELL domain containing 1                                                                                                                                                  | OCEL1           | 0,68 |
| c-fos induced growth factor (vascular endothelial growth factor D)                                                                                                                | FIGF            | 0,68 |
| Rho guanine nucleotide exchange factor 11                                                                                                                                         | ARHGEF11        | 0,68 |
| acyl-CoA thioesterase 13                                                                                                                                                          | ACOT13          | 0,68 |
| NmrA-like family domain containing 1                                                                                                                                              | NMRAL1          | 0,68 |
| nuclear pore complex interacting protein family, member A3                                                                                                                        | NPIPA3          | 0,68 |
| natriuretic peptide receptor 2                                                                                                                                                    | NPR2            | 0,68 |
| peroxisome proliferator-activated receptor gamma                                                                                                                                  | PPARG           | 0,68 |
| family with sequence similarity 198, member B                                                                                                                                     | FAM198B         | 0,68 |
| D-2-hydroxyglutarate dehydrogenase                                                                                                                                                | D2HGDH          | 0,68 |
| zinc finger protein 22                                                                                                                                                            | ZNF22           | 0,68 |

|                                                                                                            |           |      |
|------------------------------------------------------------------------------------------------------------|-----------|------|
| Kruppel-like factor 3 (basic)                                                                              | KLF3      | 0,68 |
| beta-1,3-N-acetylgalactosaminyltransferase 2                                                               | B3GALNT2  | 0,68 |
| surfeit 1                                                                                                  | SURF1     | 0,68 |
| embigin                                                                                                    | EMB       | 0,68 |
| chromosome 6 open reading frame 120                                                                        | C6orf120  | 0,68 |
| Memczak2013 ANTISENSE, coding, INTERNAL, intronic<br>best transcript NM_005225                             | E2F1      | 0,68 |
| elongator acetyltransferase complex subunit 5                                                              | ELP5      | 0,68 |
| F-box protein 25                                                                                           | FBXO25    | 0,68 |
| oxidation resistance 1                                                                                     | OXR1      | 0,68 |
| spermatogenesis associated 7                                                                               | SPATA7    | 0,68 |
| olfactory receptor, family 2, subfamily T, member 6                                                        | OR2T6     | 0,68 |
| hepatoma-derived growth factor                                                                             | HDGF      | 0,68 |
| chromosome 10 open reading frame 111                                                                       | C10orf111 | 0,68 |
| SWI/SNF related, matrix associated, actin dependent<br>regulator of chromatin, subfamily b, member 1       | SMARCB1   | 0,68 |
| coenzyme Q3 methyltransferase                                                                              | COQ3      | 0,68 |
| NEDD8 activating enzyme E1 subunit 1                                                                       | NAE1      | 0,68 |
| SAC3 domain containing 1                                                                                   | SAC3D1    | 0,68 |
| dpy-19-like 4 (C. elegans)                                                                                 | DPY19L4   | 0,68 |
| vomer nasal 1 receptor 1                                                                                   | VN1R1     | 0,68 |
| Memczak2013 ANTISENSE, CDS, coding, INTERNAL best<br>transcript NM_006184                                  | NUCB1     | 0,68 |
| leucyl-tRNA synthetase 2, mitochondrial                                                                    | LARS2     | 0,68 |
| ribophorin I                                                                                               | RPN1      | 0,68 |
| intraflagellar transport 20                                                                                | IFT20     | 0,68 |
| ciliary neurotrophic factor                                                                                | CNTF      | 0,68 |
| nonhomologous end-joining factor 1                                                                         | NHEJ1     | 0,68 |
| cancer susceptibility candidate 5                                                                          | CASC5     | 0,68 |
| malonyl-CoA decarboxylase                                                                                  | MLYCD     | 0,68 |
| phosphatidylinositol glycan anchor biosynthesis class M                                                    | PIGM      | 0,68 |
| phosphodiesterase 7A                                                                                       | PDE7A     | 0,68 |
| pre-B-cell leukemia homeobox interacting protein 1                                                         | PBXIP1    | 0,68 |
| acidic nuclear phosphoprotein 32 family member B                                                           | ANP32B    | 0,68 |
| inositol polyphosphate-5-phosphatase J                                                                     | INPP5J    | 0,68 |
| adenosine deaminase, RNA-specific                                                                          | ADAR      | 0,68 |
| lysine (K)-specific demethylase 3B                                                                         | KDM3B     | 0,68 |
| cathepsin K                                                                                                | CTSK      | 0,68 |
| solute carrier family 2 (facilitated glucose transporter),<br>member 6 [Source:HGNC Symbol;Acc:HGNC:11011] | SLC2A6    | 0,68 |
| receptor (chemosensory) transporter protein 5 (putative)                                                   | RTP5      | 0,68 |
| torsin family 3, member A                                                                                  | TOR3A     | 0,68 |
| alkylglycerol monooxygenase                                                                                | AGMO      | 0,68 |
| inositol polyphosphate-5-phosphatase A                                                                     | INPP5A    | 0,68 |



|                                                                                                |          |      |
|------------------------------------------------------------------------------------------------|----------|------|
| Memczak2013 ANTISENSE, coding, INTERNAL, intronic<br>best transcript NM_001161841              | SULF2    | 0,68 |
| phosphomannomutase 1                                                                           | PMM1     | 0,68 |
| zinc finger protein 830                                                                        | ZNF830   | 0,68 |
| purine-rich element binding protein A                                                          | PURA     | 0,68 |
| cytohesin 1                                                                                    | CYTH1    | 0,68 |
| musashi RNA binding protein 1                                                                  | MSI1     | 0,68 |
| adaptor-related protein complex 5, beta 1 subunit                                              | AP5B1    | 0,68 |
| myeloid/lymphoid or mixed-lineage leukemia;<br>translocated to, 3                              | MLLT3    | 0,68 |
| heterogeneous nuclear ribonucleoprotein R                                                      | HNRNPR   | 0,68 |
| mitochondrial ribosomal protein S27                                                            | MRPS27   | 0,68 |
| UDP-glucuronate decarboxylase 1                                                                | UXS1     | 0,68 |
| sphingosine kinase 1                                                                           | SPHK1    | 0,68 |
| hexamethylene bis-acetamide inducible 2                                                        | HEXIM2   | 0,68 |
| sterile alpha motif domain containing 9                                                        | SAMD9    | 0,68 |
| neural retina leucine zipper                                                                   | NRL      | 0,68 |
| bone morphogenetic protein receptor type IB                                                    | BMPR1B   | 0,68 |
| Rho guanine nucleotide exchange factor (GEF) 12                                                | ARHGEF12 | 0,68 |
| sideroflexin 1                                                                                 | SFXN1    | 0,68 |
| Sin3A associated protein 30kDa                                                                 | SAP30    | 0,68 |
| olfactory receptor, family 2, subfamily G, member 2                                            | OR2G2    | 0,68 |
| defensin, beta 131                                                                             | DEFB131  | 0,68 |
| thioesterase superfamily member 5                                                              | THEM5    | 0,68 |
| Transcript Identified by AceView, Entrez Gene ID(s)<br>220972                                  | MARCH8   | 0,68 |
| TBC1 domain family, member 10B                                                                 | TBC1D10B | 0,68 |
| RAB28, member RAS oncogene family                                                              | RAB28    | 0,68 |
| eukaryotic translation initiation factor 4E binding protein<br>2                               | EIF4EBP2 | 0,68 |
| histone cluster 1, H3e                                                                         | HIST1H3E | 0,68 |
| family with sequence similarity 76, member A                                                   | FAM76A   | 0,68 |
| spermatogenesis associated 18                                                                  | SPATA18  | 0,68 |
| tissue factor pathway inhibitor (lipoprotein-associated<br>coagulation inhibitor)              | TFPI     | 0,68 |
| cellular repressor of E1A-stimulated genes 2                                                   | CREG2    | 0,68 |
| F-box and WD repeat domain containing 4                                                        | FBXW4    | 0,68 |
| ribosomal protein, large, P0                                                                   | RPLP0    | 0,68 |
| mediator complex subunit 12 like                                                               | MED12L   | 0,68 |
| calcium/calmodulin-dependent protein kinase I                                                  | CAMK1    | 0,68 |
| solute carrier family 25 (mitochondrial carrier; adenine<br>nucleotide translocator), member 4 | SLC25A4  | 0,68 |
| transmembrane protein 60                                                                       | TMEM60   | 0,68 |
| pumilio RNA binding family member 1                                                            | PUM1     | 0,68 |
| lin-7 homolog C (C. elegans)                                                                   | LIN7C    | 0,68 |

|                                                                                                                           |                            |      |
|---------------------------------------------------------------------------------------------------------------------------|----------------------------|------|
| adhesion G protein-coupled receptor L2                                                                                    | ADGRL2                     | 0,68 |
| gonadotropin releasing hormone 2                                                                                          | GNRH2                      | 0,68 |
| tigger transposable element derived 4                                                                                     | TIGD4                      | 0,68 |
| sulfotransferase family 4A member 1                                                                                       | SULT4A1                    | 0,68 |
| immunity-related GTPase family, Q                                                                                         | IRGQ                       | 0,68 |
| thioredoxin-related transmembrane protein 1                                                                               | TMX1                       | 0,68 |
| GrpE-like 2, mitochondrial (E. coli)                                                                                      | GRPEL2                     | 0,68 |
| taste receptor, type 2, member 50                                                                                         | TAS2R50                    | 0,68 |
| voltage-dependent anion channel 1                                                                                         | VDAC1                      | 0,68 |
| mitogen-activated protein kinase kinase kinase 3                                                                          | MAP3K3                     | 0,67 |
| importin 8                                                                                                                | IPO8                       | 0,67 |
| solute carrier family 39 (zinc transporter), member 1                                                                     | SLC39A1                    | 0,67 |
| acyl-CoA dehydrogenase family, member 9                                                                                   | ACAD9                      | 0,67 |
| heat shock 70kDa protein 5 (glucose-regulated protein, 78kDa)                                                             | HSPA5                      | 0,67 |
| cell growth regulator with ring finger domain 1                                                                           | CGRRF1                     | 0,67 |
| lysine (K)-specific demethylase 5B                                                                                        | KDM5B                      | 0,67 |
| free fatty acid receptor 3                                                                                                | FFAR3                      | 0,67 |
| beta-defensin 131-like                                                                                                    | LOC100129216               | 0,67 |
| phosphomannomutase 2                                                                                                      | PMM2                       | 0,67 |
| cytochrome P450, family 21, subfamily A, polypeptide 1 pseudogene; cytochrome P450, family 21, subfamily A, polypeptide 2 | CYP21A1P;<br>CYP21A2       | 0,67 |
| adenylate kinase 3                                                                                                        | AK3                        | 0,67 |
| histone cluster 1, H2bc                                                                                                   | HIST1H2BC                  | 0,67 |
| RANBP2-like and GRIP domain containing 6; RANBP2-like and GRIP domain containing 5                                        | RGPD6; RGPD5               | 0,67 |
| acyl-CoA dehydrogenase family, member 10                                                                                  | ACAD10                     | 0,67 |
| Transcript Identified by AceView, Entrez Gene ID(s) 84909; novel transcript                                               | C9orf3; RP11-49014.3       | 0,67 |
| sorting nexin 14                                                                                                          | SNX14                      | 0,67 |
| coiled-coil domain containing 64B                                                                                         | CCDC64B                    | 0,67 |
| THO complex 2                                                                                                             | THOC2                      | 0,67 |
| PAF1 homolog, Paf1/RNA polymerase II complex component                                                                    | PAF1                       | 0,67 |
| chromosome 7 open reading frame 60                                                                                        | C7orf60                    | 0,67 |
| nudix hydrolase 4 pseudogene 1; nudix hydrolase 4 pseudogene 2; nudix hydrolase 4                                         | NUDT4P1;<br>NUDT4P2; NUDT4 | 0,67 |
| nudix hydrolase 4; nudix hydrolase 4 pseudogene 1                                                                         | NUDT4; NUDT4P1             | 0,67 |
| phosphoglycerate kinase 1                                                                                                 | PGK1                       | 0,67 |
| tetratricopeptide repeat domain 9C                                                                                        | TTC9C                      | 0,67 |
| zinc finger protein 780B                                                                                                  | ZNF780B                    | 0,67 |
| SEC31 homolog B, COPII coat complex component                                                                             | SEC31B                     | 0,67 |

|                                                                                           |                |      |
|-------------------------------------------------------------------------------------------|----------------|------|
| protein tyrosine phosphatase, non-receptor type 18 (brain-derived)                        | PTPN18         | 0,67 |
| protein kinase, interferon-inducible double stranded RNA dependent activator              | PRKRA          | 0,67 |
| xyloside xylosyltransferase 1                                                             | XXYLT1         | 0,67 |
| H2B histone family, member M                                                              | H2BFM          | 0,67 |
| SCY1-like, kinase-like 1                                                                  | SCYL1          | 0,67 |
| inositol polyphosphate-5-phosphatase D                                                    | INPP5D         | 0,67 |
| acyl-CoA synthetase long-chain family member 6                                            | ACSL6          | 0,67 |
| olfactory receptor, family 2, subfamily T, member 3                                       | OR2T3          | 0,67 |
| bromodomain adjacent to zinc finger domain 1B                                             | BAZ1B          | 0,67 |
| leucine rich repeat containing 39                                                         | LRRC39         | 0,67 |
| macrophage migration inhibitory factor (glycosylation-inhibiting factor)                  | MIF            | 0,67 |
|                                                                                           | LRIG1          | 0,67 |
| SUMO1/sentrin specific peptidase 1                                                        | SENP1          | 0,67 |
| surfeit 1                                                                                 | SURF1          | 0,67 |
| LDL receptor related protein 1                                                            | LRP1           | 0,67 |
| Transcript Identified by AceView, Entrez Gene ID(s) 7073                                  | TIAL1          | 0,67 |
| serine racemase                                                                           | SRR            | 0,67 |
| inter-alpha-trypsin inhibitor heavy chain family, member 5                                | ITIH5          | 0,67 |
| Memczak2013 ALT_ACCEPTOR, ALT_DONOR, coding, INTERNAL, intronic best transcript NM_005534 | IFNGR2         | 0,67 |
| protein kinase C substrate 80K-H                                                          | PRKCSH         | 0,67 |
| golgi-associated PDZ and coiled-coil motif containing                                     | GOPC           | 0,67 |
| 5-hydroxymethylcytosine (hmC) binding, ES cell-specific                                   | HMCES          | 0,67 |
| F-box protein 34                                                                          | FBXO34         | 0,67 |
| activating transcription factor 7 interacting protein 2                                   | ATF7IP2        | 0,67 |
| UXT antisense RNA 1                                                                       | UXT-AS1        | 0,67 |
| FERM, ARH/RhoGEF and pleckstrin domain protein 1; microRNA 3170                           | FARP1; MIR3170 | 0,67 |
| transmembrane protein 5                                                                   | TMEM5          | 0,67 |
| thymine DNA glycosylase                                                                   | TDG            | 0,67 |
| SIN3 transcription regulator family member A                                              | SIN3A          | 0,67 |
| cleavage and polyadenylation specific factor 6                                            | CPSF6          | 0,67 |
| high mobility group nucleosome binding domain 1                                           | HMGN1          | 0,67 |
| golgin A5                                                                                 | GOLGA5         | 0,67 |
| zinc finger protein 780B                                                                  | ZNF780B        | 0,67 |
| protein kinase, cAMP-dependent, catalytic, alpha                                          | PRKACA         | 0,67 |
| lysine (K)-specific methyltransferase 2A                                                  | KMT2A          | 0,67 |
| coiled-coil domain containing 121                                                         | CCDC121        | 0,67 |
| mitochondrial ribosomal protein L30                                                       | MRPL30         | 0,67 |

|                                                                                                              |                 |      |
|--------------------------------------------------------------------------------------------------------------|-----------------|------|
| Transcript Identified by AceView, Entrez Gene ID(s) 83941                                                    | TM2D1           | 0,67 |
| kinesin family member 15                                                                                     | KIF15           | 0,67 |
| peroxiredoxin 3                                                                                              | PRDX3           | 0,67 |
| DCN1, defective in cullin neddylation 1, domain containing 1                                                 | DCUN1D1         | 0,67 |
| SIX homeobox 1                                                                                               | SIX1            | 0,67 |
| REX4 homolog, 3'-5' exonuclease [Source:HGNC Symbol;Acc:HGNC:12820]                                          | REXO4           | 0,67 |
| RNA polymerase II associated protein 3                                                                       | RPAP3           | 0,67 |
| zinc finger protein 689                                                                                      | ZNF689          | 0,67 |
| histone cluster 1, H2be                                                                                      | HIST1H2BE       | 0,67 |
| polymerase (RNA) III (DNA directed) polypeptide B                                                            | POLR3B          | 0,67 |
| WWC2 antisense RNA 2                                                                                         | WWC2-AS2        | 0,67 |
| ras homolog family member T2                                                                                 | RHOT2           | 0,67 |
| OTU deubiquitinase with linear linkage specificity                                                           | OTULIN          | 0,67 |
| gremlin 1, DAN family BMP antagonist [Source:HGNC Symbol;Acc:HGNC:2001]                                      | GREM1           | 0,67 |
| F-box protein, helicase, 18                                                                                  | FBXO18          | 0,67 |
| tubulin tyrosine ligase-like family member 5                                                                 | TTLL5           | 0,67 |
| chromosome 22 open reading frame 29; guanine nucleotide binding protein (G protein), beta polypeptide 1-like | C22orf29; GNB1L | 0,67 |
| hydroxymethylbilane synthase                                                                                 | HMBS            | 0,67 |
| N(alpha)-acetyltransferase 60, NatF catalytic subunit                                                        | NAA60           | 0,67 |
| transcriptional adaptor 2B                                                                                   | TADA2B          | 0,67 |
| N-myc downstream regulated 1                                                                                 | NDRG1           | 0,67 |
| Jeck2013 ANTISENSE, coding, INTERNAL, intronic best transcript NM_000088                                     | COL1A1          | 0,67 |
| zinc finger protein 253                                                                                      | ZNF253          | 0,67 |
| synaptic vesicle glycoprotein 2C                                                                             | SV2C            | 0,67 |
| hyaluronoglucosaminidase 2                                                                                   | HYAL2           | 0,67 |
| Zhang2013 ALT_ACCEPTOR, ALT_DONOR, coding, INTERNAL, intronic, OVERLAPTX, OVEXON best transcript NM_003315   | DNAJC7          | 0,67 |
| serine/arginine-rich splicing factor 8                                                                       | SRSF8           | 0,67 |
| chemokine (C-X-C motif) ligand 5                                                                             | CXCL5           | 0,67 |
| HECT domain containing E3 ubiquitin protein ligase 2                                                         | HECTD2          | 0,67 |
| histone cluster 1, H4i                                                                                       | HIST1H4I        | 0,67 |
| RPA interacting protein                                                                                      | RPAIN           | 0,67 |
| olfactory receptor, family 4, subfamily F, member 17                                                         | OR4F17          | 0,67 |
| polycystin (PKD) family receptor for egg jelly                                                               | PKDREJ          | 0,67 |
| WD repeat domain 90                                                                                          | WDR90           | 0,67 |
| fibrillarin                                                                                                  | FBL             | 0,67 |

|                                                                                           |                 |      |
|-------------------------------------------------------------------------------------------|-----------------|------|
| Transcript Identified by AceView, Entrez Gene ID(s) 8438                                  | RAD54L          | 0,67 |
| ST3 beta-galactoside alpha-2,3-sialyltransferase 2                                        | ST3GAL2         | 0,67 |
| zinc finger protein 780A                                                                  | ZNF780A         | 0,67 |
| von Willebrand factor A domain containing 9                                               | VWA9            | 0,67 |
| t-complex 10-like                                                                         | TCP10L          | 0,67 |
| Transcript Identified by AceView, Entrez Gene ID(s) 10558                                 | SPTLC1          | 0,67 |
| RAD51 paralog B                                                                           | RAD51B          | 0,67 |
| PR domain containing 8                                                                    | PRDM8           | 0,67 |
| surfeit 4                                                                                 | SURF4           | 0,67 |
| nucleobindin 1                                                                            | NUCB1           | 0,67 |
| regulator of chromosome condensation 2                                                    | RCC2            | 0,67 |
| kelch-like family member 25                                                               | KLHL25          | 0,67 |
| peptidylprolyl isomerase domain and WD repeat containing 1                                | PPWD1           | 0,67 |
| chromosome 10 open reading frame 128                                                      | C10orf128       | 0,67 |
| phosphoprotein membrane anchor with glycosphingolipid microdomains 1                      | PAG1            | 0,67 |
| AFG3-like AAA ATPase 2                                                                    | AFG3L2          | 0,67 |
| cytochrome P450, family 2, subfamily U, polypeptide 1                                     | CYP2U1          | 0,67 |
| ELAV like RNA binding protein 1                                                           | ELAVL1          | 0,67 |
| protein phosphatase 1, regulatory subunit 9A                                              | PPP1R9A         | 0,67 |
| CD180 molecule                                                                            | CD180           | 0,67 |
| cytokine receptor-like factor 1                                                           | CRLF1           | 0,66 |
| transmembrane protease, serine 3                                                          | TMPRSS3         | 0,66 |
| hexosaminidase (glycosyl hydrolase family 20, catalytic domain) containing                | HEXDC           | 0,66 |
| Leber congenital amaurosis 5                                                              | LCA5            | 0,66 |
| RWD domain containing 1                                                                   | RWDD1           | 0,66 |
| chromosome 8 open reading frame 59                                                        | C8orf59         | 0,66 |
| ubiquitin protein ligase E3 component n-recogin 3 (putative)                              | UBR3            | 0,66 |
| catenin (cadherin-associated protein), beta 1                                             | CTNNB1          | 0,66 |
| dendritic cell-associated nuclear protein                                                 | DCANP1          | 0,66 |
| transmembrane and coiled-coil domains 6                                                   | TMCO6           | 0,66 |
| Memczak2013 ALT_ACCEPTOR, ALT_DONOR, coding, INTERNAL, intronic best transcript NM_006667 | PGRMC1          | 0,66 |
| oxidoreductase NAD-binding domain containing 1                                            | OXNAD1          | 0,66 |
| HECT domain containing E3 ubiquitin protein ligase 4; microRNA 6861                       | HECTD4; MIR6861 | 0,66 |
| protocadherin beta 12                                                                     | PCDHB12         | 0,66 |
| Transcript Identified by AceView, Entrez Gene ID(s) 31                                    | ACACA           | 0,66 |
| beta 3-glucosyltransferase                                                                | B3GLCT          | 0,66 |
| N-myc (and STAT) interactor                                                               | NMI             | 0,66 |

|                                                                                  |               |      |
|----------------------------------------------------------------------------------|---------------|------|
| mannosidase, alpha, class 2B, member 2                                           | MAN2B2        | 0,66 |
| protein phosphatase, Mg2+/Mn2+ dependent, 1F                                     | PPM1F         | 0,66 |
| fibrillarin                                                                      | FBL           | 0,66 |
| pseudouridylate synthase-like 1                                                  | PUSL1         | 0,66 |
| muscle-related coiled-coil protein                                               | MURC          | 0,66 |
| Transcript Identified by AceView, Entrez Gene ID(s) 8148                         | TAF15         | 0,66 |
| Transcript Identified by AceView, Entrez Gene ID(s) 10019                        | SH2B3         | 0,66 |
| TSPY-like 6                                                                      | TSPYL6        | 0,66 |
| COMM domain containing 10                                                        | COMMD10       | 0,66 |
| ribokinase; BRE antisense RNA 1                                                  | RBKS; BRE-AS1 | 0,66 |
| guanosine monophosphate reductase 2                                              | GMPR2         | 0,66 |
| protein phosphatase, Mg2+/Mn2+ dependent, 1D                                     | PPM1D         | 0,66 |
| ISL LIM homeobox 1                                                               | ISL1          | 0,66 |
| transmembrane protein 30C                                                        | TMEM30C       | 0,66 |
| spermatogenesis associated 5-like 1                                              | SPATA5L1      | 0,66 |
| F-box protein 11                                                                 | FBXO11        | 0,66 |
| opsin 1 (cone pigments), medium-wave-sensitive 2                                 | OPN1MW2       | 0,66 |
| LIM and senescent cell antigen-like domains 1                                    | LIMS1         | 0,66 |
| VANGL planar cell polarity protein 1                                             | VANGL1        | 0,66 |
| hydroxymethylbilane synthase                                                     | HMBS          | 0,66 |
| signal transducer and activator of transcription 3 (acute-phase response factor) | STAT3         | 0,66 |
| zinc finger protein 548                                                          | ZNF548        | 0,66 |
| epithelial cell adhesion molecule                                                | EPCAM         | 0,66 |
| BMP and activin membrane-bound inhibitor                                         | BAMBI         | 0,66 |
| kinesin family member 15                                                         | KIF15         | 0,66 |
| CCZ1 homolog B, vacuolar protein trafficking and biogenesis associated           | CCZ1B         | 0,66 |
| retinoic acid induced 1                                                          | RAI1          | 0,66 |
| cilia and flagella associated protein 100                                        | CFAP100       | 0,66 |
| ankyrin repeat and SOCS box containing 1                                         | ASB1          | 0,66 |
| translocase of inner mitochondrial membrane 13 homolog (yeast)                   | TIMM13        | 0,66 |
| cochlin                                                                          | COCH          | 0,66 |
| 3-hydroxyisobutyryl-CoA hydrolase                                                | HIBCH         | 0,66 |
| histone cluster 1, H4g                                                           | HIST1H4G      | 0,66 |
|                                                                                  | PRAMEF9       | 0,66 |
| NOP2/Sun domain family, member 4                                                 | NSUN4         | 0,66 |
| zinc finger protein 451                                                          | ZNF451        | 0,66 |
| chloride intracellular channel 4                                                 | CLIC4         | 0,66 |
| inhibitor of growth family member 4                                              | ING4          | 0,66 |
| chromosome 4 open reading frame 3                                                | C4orf3        | 0,66 |
| transcription factor A, mitochondrial                                            | TFAM          | 0,66 |

|                                                                                                   |               |      |
|---------------------------------------------------------------------------------------------------|---------------|------|
| diacylglycerol kinase, delta 130kDa                                                               | DGKD          | 0,66 |
| basal body orientation factor 1                                                                   | BBOF1         | 0,66 |
| glutaryl-CoA dehydrogenase                                                                        | GCDH          | 0,66 |
| olfactory receptor, family 7, subfamily G, member 1                                               | OR7G1         | 0,66 |
| biogenesis of lysosomal organelles complex-1, subunit 5, muted                                    | BLOC1S5       | 0,66 |
| claudin 15                                                                                        | CLDN15        | 0,66 |
| calcium/calmodulin-dependent protein kinase II gamma                                              | CAMK2G        | 0,66 |
| TRAF-type zinc finger domain containing 1                                                         | TRAFD1        | 0,66 |
| solute carrier family 38, member 2                                                                | SLC38A2       | 0,66 |
| hydroxyacid oxidase (glycolate oxidase) 1                                                         | HAO1          | 0,66 |
| golgin A4                                                                                         | GOLGA4        | 0,66 |
| colorectal cancer associated 1                                                                    | COLCA1        | 0,66 |
| 5-3 exoribonuclease 1                                                                             | XRN1          | 0,66 |
| TAF5 RNA polymerase II, TATA box binding protein (TBP)-associated factor, 100kDa                  | TAF5          | 0,66 |
| F-box protein 39                                                                                  | FBXO39        | 0,66 |
| Transcript Identified by AceView, Entrez Gene ID(s) 9759                                          | HDAC4         | 0,66 |
| EF-hand calcium binding domain 2                                                                  | EFCAB2        | 0,66 |
| zinc finger protein 821                                                                           | ZNF821        | 0,66 |
| Transcript Identified by AceView, Entrez Gene ID(s) 3988                                          | LIPA          | 0,66 |
| growth differentiation factor 11                                                                  | GDF11         | 0,66 |
| ELOVL fatty acid elongase 6                                                                       | ELOVL6        | 0,66 |
| A kinase (PRKA) anchor protein 7                                                                  | AKAP7         | 0,66 |
| protein arginine methyltransferase 2                                                              | PRMT2         | 0,66 |
| inhibitor of growth family member 1                                                               | ING1          | 0,66 |
| kinesin family member 15                                                                          | KIF15         | 0,66 |
| dual specificity phosphatase 22                                                                   | DUSP22        | 0,66 |
| Memczak2013 ANTISENSE, coding, INTERNAL, intronic best transcript NM_020821                       | VPS13C        | 0,66 |
| cytochrome P450, family 7, subfamily A, polypeptide 1                                             | CYP7A1        | 0,66 |
| lysine-rich coiled-coil 1                                                                         | KRCC1         | 0,66 |
| anaphase promoting complex subunit 4                                                              | ANAPC4        | 0,66 |
| SWI/SNF related, matrix associated, actin dependent regulator of chromatin, subfamily e, member 1 | SMARCE1       | 0,66 |
| inositol polyphosphate-5-phosphatase D                                                            | INPP5D        | 0,66 |
| excision repair cross-complementation group 5                                                     | ERCC5         | 0,66 |
| GCN1 eIF2 alpha kinase activator homolog; microRNA 4498                                           | GCN1; MIR4498 | 0,66 |
| phosphoinositide kinase, FYVE finger containing                                                   | PIKFYVE       | 0,66 |
| galactosamine (N-acetyl)-6-sulfatase                                                              | GALNS         | 0,66 |
| SREBF chaperone                                                                                   | SCAP          | 0,66 |
| GC-rich promoter binding protein 1-like 1                                                         | GPBP1L1       | 0,66 |

|                                                                                          |                        |      |
|------------------------------------------------------------------------------------------|------------------------|------|
| zinc finger protein 24                                                                   | ZNF24                  | 0,66 |
| intraflagellar transport 74                                                              | IFT74                  | 0,66 |
| cell division cycle associated 8                                                         | CDCA8                  | 0,66 |
| nuclear receptor subfamily 1, group D, member 2                                          | NR1D2                  | 0,66 |
| UBA domain containing 2                                                                  | UBAC2                  | 0,66 |
| spermatogenesis associated 2-like                                                        | SPATA2L                | 0,66 |
| long intergenic non-protein coding RNA 1465                                              | LINC01465              | 0,66 |
| Zhang2013 ALT_ACCEPTOR, ALT_DONOR, coding, INTERNAL, intronic best transcript NM_015179  | RRP12                  | 0,66 |
| GrpE-like 1, mitochondrial (E. coli)                                                     | GRPEL1                 | 0,66 |
| TAR (HIV-1) RNA binding protein 1                                                        | TARBP1                 | 0,66 |
| ribosomal protein L5; small nucleolar RNA, C/D box 21; small nucleolar RNA, H/ACA box 66 | RPL5; SNORD21; SNORA66 | 0,66 |
| SRSF protein kinase 2                                                                    | SRPK2                  | 0,66 |
| neuralized E3 ubiquitin protein ligase 4                                                 | NEURL4                 | 0,66 |
| taspase 1                                                                                | TASP1                  | 0,66 |
| unc-51 like autophagy activating kinase 2                                                | ULK2                   | 0,66 |
| EF-hand calcium binding domain 12                                                        | EFCAB12                | 0,66 |
| HECT domain and ankyrin repeat containing E3 ubiquitin protein ligase 1                  | HACE1                  | 0,66 |
| leukocyte immunoglobulin-like receptor, subfamily A (with TM domain), member 4           | LILRA4                 | 0,66 |
| thiosulfate sulfurtransferase (rhodanese)-like domain containing 1                       | TSTD1                  | 0,66 |
| MAP7 domain containing 2                                                                 | MAP7D2                 | 0,66 |
| cytochrome c-1                                                                           | CYC1                   | 0,66 |
| negative elongation factor complex member C/D                                            | NELFCD                 | 0,66 |
| Jeck2013 ALT_ACCEPTOR, ALT_DONOR, coding, INTERNAL, intronic best transcript NM_020177   | FEM1C                  | 0,66 |
| EGF containing fibulin-like extracellular matrix protein 2                               | EFEMP2                 | 0,66 |
| fucosidase, alpha-L- 1, tissue                                                           | FUCA1                  | 0,66 |
| VPS26 retromer complex component B                                                       | VPS26B                 | 0,66 |
| N-acetylneuraminic acid phosphatase                                                      | NANP                   | 0,66 |
| activating transcription factor 4                                                        | ATF4                   | 0,66 |
| Transcript Identified by AceView, Entrez Gene ID(s) 254251                               | LCORL                  | 0,66 |
| signal transducing adaptor family member 2                                               | STAP2                  | 0,66 |
| K(lysine) acetyltransferase 5                                                            | KAT5                   | 0,66 |
| pyruvate carboxylase                                                                     | PC                     | 0,66 |
| chromosome 16 open reading frame 54                                                      | C16orf54               | 0,66 |
| WD repeat domain, phosphoinositide interacting 1                                         | WIP1                   | 0,66 |
| stromal antigen 3                                                                        | STAG3                  | 0,66 |
| EH domain binding protein 1                                                              | EHBP1                  | 0,66 |
| spermatogenesis associated, serine-rich 2                                                | SPATS2                 | 0,66 |
| zinc finger, FYVE domain containing 21                                                   | ZFYVE21                | 0,66 |



|                                                                                                         |                     |      |
|---------------------------------------------------------------------------------------------------------|---------------------|------|
| MANSC domain containing 1                                                                               | MANSC1              | 0,65 |
| PAX interacting (with transcription-activation domain) protein 1                                        | PAXIP1              | 0,65 |
| ligase I, DNA, ATP-dependent                                                                            | LIG1                | 0,65 |
| mitochondrial fission regulator 1                                                                       | MTFR1               | 0,65 |
| formiminotransferase cyclodeaminase N-terminal like                                                     | FTCDNL1             | 0,65 |
| nudix hydrolase 12                                                                                      | NUDT12              | 0,65 |
| DEAH (Asp-Glu-Ala-His) box helicase 15                                                                  | DHX15               | 0,65 |
| establishment of sister chromatid cohesion N-acetyltransferase 1                                        | ESCO1               | 0,65 |
| cathepsin H                                                                                             | CTSH                | 0,65 |
| Transcript Identified by AceView, Entrez Gene ID(s) 8470                                                | SORBS2              | 0,65 |
| uracil phosphoribosyltransferase (FUR1) homolog (S. cerevisiae)                                         | UPRT                | 0,65 |
| apolipoprotein L, 3                                                                                     | APOL3               | 0,65 |
| cullin 7                                                                                                | CUL7                | 0,65 |
| NIPA-like domain containing 2                                                                           | NIPAL2              | 0,65 |
| COBW domain containing 5                                                                                | CBWD5               | 0,65 |
| sorting nexin 13                                                                                        | SNX13               | 0,65 |
| proline-rich protein HaellI subfamily 1; taste receptor, type 2, member 14; proline rich 4 (lacrimal)   | PRH1; TAS2R14; PRR4 | 0,65 |
| transcription elongation factor B (SIII), polypeptide 2 (18kDa, elongin B)                              | TCEB2               | 0,65 |
| solute carrier family 2 (facilitated glucose transporter), member 6 [Source:HGNC Symbol;Acc:HGNC:11011] | SLC2A6              | 0,65 |
| platelet factor 4                                                                                       | PF4                 | 0,65 |
| THAP domain containing 5                                                                                | THAP5               | 0,65 |
| Transcript Identified by AceView, Entrez Gene ID(s) 6872                                                | TAF1                | 0,65 |
| fibromodulin                                                                                            | FMOD                | 0,65 |
| potassium voltage-gated channel, modifier subfamily S, member 3                                         | KCNS3               | 0,65 |
| Memczak2013 ANTISENSE, CDS, coding, INTERNAL best transcript NM_001195422                               | GTPBP3              | 0,65 |
| ADAM metalloproteinase domain 32                                                                        | ADAM32              | 0,65 |
| RNA pseudouridylate synthase domain containing 4                                                        | RPUSD4              | 0,65 |
| ribosomal protein L13; small nucleolar RNA, C/D box 68                                                  | RPL13; SNORD68      | 0,65 |
| transmembrane protein 219                                                                               | TMEM219             | 0,65 |
| solute carrier family 25, member 48                                                                     | SLC25A48            | 0,65 |
| Memczak2013 ANTISENSE, coding, INTERNAL, intronic best transcript NM_006322                             | TUBGCP3             | 0,65 |
| oxoeicosanoid (OXE) receptor 1                                                                          | OXER1               | 0,65 |
| methionyl-tRNA synthetase; microRNA 6758                                                                | MARS; MIR6758       | 0,65 |
| zinc finger protein 839                                                                                 | ZNF839              | 0,65 |

|                                                                              |                            |      |
|------------------------------------------------------------------------------|----------------------------|------|
| hydroxysteroid (17-beta) dehydrogenase 11                                    | HSD17B11                   | 0,65 |
| calcium channel, voltage-dependent, beta 4 subunit                           | CACNB4                     | 0,65 |
| fibronectin leucine rich transmembrane protein 3                             | FLRT3                      | 0,65 |
| TNNI3 interacting kinase                                                     | TNNI3K                     | 0,65 |
| transcription factor Dp-1                                                    | TFDP1                      | 0,65 |
| enoyl-CoA hydratase domain containing 2                                      | ECHDC2                     | 0,65 |
| GID complex subunit 4 homolog                                                | GID4                       | 0,65 |
| 3-hydroxyanthranilate 3,4-dioxygenase                                        | HAAO                       | 0,65 |
| dual specificity phosphatase 19                                              | DUSP19                     | 0,65 |
| ZHX1-C8orf76 readthrough                                                     | ZHX1-C8orf76               | 0,65 |
| diacylglycerol kinase, delta 130kDa                                          | DGKD                       | 0,65 |
| family with sequence similarity 155, member A                                | FAM155A                    | 0,65 |
| CCR4-NOT transcription complex subunit 1; small nucleolar RNA, H/ACA box 50A | CNOT1;<br>SNORA50A         | 0,65 |
| GC-rich sequence DNA-binding factor 2                                        | GCFC2                      | 0,65 |
| beta-2-microglobulin                                                         | B2M                        | 0,65 |
| TMEM110-MUSTN1 readthrough; transmembrane protein 110                        | TMEM110-MUSTN1;<br>TMEM110 | 0,65 |
| scaffold attachment factor B2                                                | SAFB2                      | 0,65 |
| transmembrane protein 177                                                    | TMEM177                    | 0,65 |
| ubiquitously transcribed tetratricopeptide repeat containing, Y-linked       | UTY                        | 0,65 |
| DEAD (Asp-Glu-Ala-Asp) box polypeptide 46                                    | DDX46                      | 0,65 |
| solute carrier family 27 (fatty acid transporter), member 3                  | SLC27A3                    | 0,65 |
| kinesin family member 16B                                                    | KIF16B                     | 0,65 |
| scribbled planar cell polarity protein; microRNA 937                         | SCRIB; MIR937              | 0,65 |
| solute carrier family 22, member 10                                          | SLC22A10                   | 0,65 |
| hydroxymethylbilane synthase                                                 | HMBS                       | 0,65 |
| minichromosome maintenance complex component 4                               | MCM4                       | 0,65 |
| diffuse panbronchiolitis critical region 1                                   | DPCR1                      | 0,65 |
| WAPL cohesin release factor                                                  | WAPL                       | 0,65 |
| Transcript Identified by AceView, Entrez Gene ID(s) 7037                     | TFRC                       | 0,65 |
| UDP-glucose glycoprotein glucosyltransferase 2                               | UGGT2                      | 0,65 |
| zinc finger and BTB domain containing 14                                     | ZBTB14                     | 0,65 |
| lysine (K)-specific demethylase 4C                                           | KDM4C                      | 0,65 |
| pyruvate dehydrogenase phosphatase regulatory subunit                        | PDPR                       | 0,65 |
| hemochromatosis                                                              | HFE                        | 0,65 |
| V-set and immunoglobulin domain containing 10                                | VSIG10                     | 0,65 |
| Transcript Identified by AceView, Entrez Gene ID(s) 3839                     | KPNA3                      | 0,65 |
| protocadherin beta 14                                                        | PCDHB14                    | 0,65 |

|                                                                                                                                                                                                                                                                                                                                                                                                                                                                                                                           |                                                                                             |      |
|---------------------------------------------------------------------------------------------------------------------------------------------------------------------------------------------------------------------------------------------------------------------------------------------------------------------------------------------------------------------------------------------------------------------------------------------------------------------------------------------------------------------------|---------------------------------------------------------------------------------------------|------|
| ribosomal protein S6 kinase, 90kDa, polypeptide 2                                                                                                                                                                                                                                                                                                                                                                                                                                                                         | RPS6KA2                                                                                     | 0,65 |
| mitogen-activated protein kinase kinase 2                                                                                                                                                                                                                                                                                                                                                                                                                                                                                 | MAP2K2                                                                                      | 0,65 |
| zinc finger protein 232                                                                                                                                                                                                                                                                                                                                                                                                                                                                                                   | ZNF232                                                                                      | 0,65 |
| zinc finger protein 780B                                                                                                                                                                                                                                                                                                                                                                                                                                                                                                  | ZNF780B                                                                                     | 0,65 |
| zinc finger protein 780B                                                                                                                                                                                                                                                                                                                                                                                                                                                                                                  | ZNF780B                                                                                     | 0,65 |
| small integral membrane protein 19                                                                                                                                                                                                                                                                                                                                                                                                                                                                                        | SMIM19                                                                                      | 0,65 |
| transmembrane protein 128                                                                                                                                                                                                                                                                                                                                                                                                                                                                                                 | TMEM128                                                                                     | 0,65 |
| ASH1L antisense RNA 1                                                                                                                                                                                                                                                                                                                                                                                                                                                                                                     | ASH1L-AS1                                                                                   | 0,65 |
| sulfotransferase family 1B member 1                                                                                                                                                                                                                                                                                                                                                                                                                                                                                       | SULT1B1                                                                                     | 0,65 |
| FK506 binding protein 3                                                                                                                                                                                                                                                                                                                                                                                                                                                                                                   | FKBP3                                                                                       | 0,65 |
| zinc finger protein 852                                                                                                                                                                                                                                                                                                                                                                                                                                                                                                   | ZNF852                                                                                      | 0,65 |
| PTPN13-like, Y-linked; PTPN13-like, Y-linked 2                                                                                                                                                                                                                                                                                                                                                                                                                                                                            | PRY; PRY2                                                                                   | 0,65 |
| small ubiquitin-like modifier 4                                                                                                                                                                                                                                                                                                                                                                                                                                                                                           | SUMO4                                                                                       | 0,65 |
| biogenesis of lysosomal organelles complex-1, subunit 4, cappuccino                                                                                                                                                                                                                                                                                                                                                                                                                                                       | BLOC1S4                                                                                     | 0,65 |
| splicing factor 1                                                                                                                                                                                                                                                                                                                                                                                                                                                                                                         | SF1                                                                                         | 0,65 |
| replication protein A3                                                                                                                                                                                                                                                                                                                                                                                                                                                                                                    | RPA3                                                                                        | 0,65 |
| Jeck2013 ALT_ACCEPTOR, ALT_DONOR, coding, INTERNAL, intronic best transcript NM_012474                                                                                                                                                                                                                                                                                                                                                                                                                                    | UCK2                                                                                        | 0,65 |
| LDL receptor related protein 6                                                                                                                                                                                                                                                                                                                                                                                                                                                                                            | LRP6                                                                                        | 0,65 |
| serine/arginine-rich splicing factor 2; microRNA 636                                                                                                                                                                                                                                                                                                                                                                                                                                                                      | SRSF2; MIR636                                                                               | 0,65 |
| tripartite motif containing 41                                                                                                                                                                                                                                                                                                                                                                                                                                                                                            | TRIM41                                                                                      | 0,65 |
| coagulation factor XIII, B polypeptide                                                                                                                                                                                                                                                                                                                                                                                                                                                                                    | F13B                                                                                        | 0,65 |
| STEAP family member 3, metalloredutase                                                                                                                                                                                                                                                                                                                                                                                                                                                                                    | STEAP3                                                                                      | 0,65 |
| transmembrane protein 41A                                                                                                                                                                                                                                                                                                                                                                                                                                                                                                 | TMEM41A                                                                                     | 0,65 |
| golgi glycoprotein 1                                                                                                                                                                                                                                                                                                                                                                                                                                                                                                      | GLG1                                                                                        | 0,65 |
| Transcript Identified by AceView, Entrez Gene ID(s) 93663; 253582; Jeck2013 ALT_ACCEPTOR, ALT_DONOR, downstream_end, ncRNA, OVEXON, upstream_start best transcript TCONS_I2_00025470; Jeck2013 ALT_ACCEPTOR, ncRNA, OVEXON, upstream_start best transcript TCONS_I2_00024911; Salzman2013 ANTISENSE, CDS, coding, downstream_end, intronic, OVCODE, OVEXON, UTR3 best transcript NM_000426; Salzman2013 ANNOTATED, INTERNAL, ncRNA, OVEXON best transcript TCONS_I2_00025470; putative novel transcript; novel transcript | C6orf191andARH GAP18; RP1-69D17.4; RP1-69D17.3; TCONS_I2_00025470; TCONS_I2_00024911; LAMA2 | 0,65 |
| forkhead box B1                                                                                                                                                                                                                                                                                                                                                                                                                                                                                                           | FOXB1                                                                                       | 0,65 |
| chromatin licensing and DNA replication factor 1                                                                                                                                                                                                                                                                                                                                                                                                                                                                          | CDT1                                                                                        | 0,65 |
| nudE neurodevelopment protein 1-like 1                                                                                                                                                                                                                                                                                                                                                                                                                                                                                    | NDEL1                                                                                       | 0,65 |
| all-trans retinoic acid-induced differentiation factor                                                                                                                                                                                                                                                                                                                                                                                                                                                                    | ATRAID                                                                                      | 0,65 |
| citrate lyase beta like                                                                                                                                                                                                                                                                                                                                                                                                                                                                                                   | CLYBL                                                                                       | 0,65 |
| zinc finger protein 33B                                                                                                                                                                                                                                                                                                                                                                                                                                                                                                   | ZNF33B                                                                                      | 0,65 |
| methylcrotonoyl-CoA carboxylase 2                                                                                                                                                                                                                                                                                                                                                                                                                                                                                         | MCCC2                                                                                       | 0,65 |

|                                                                                      |                 |      |
|--------------------------------------------------------------------------------------|-----------------|------|
| solute carrier family 35 (UDP-xylose/UDP-N-acetylglucosamine transporter), member B4 | SLC35B4         | 0,65 |
| phosphatidylinositol glycan anchor biosynthesis class Y; PIGY upstream reading frame | PIGY; PYURF     | 0,65 |
| PYM homolog 1, exon junction complex associated factor                               | PYM1            | 0,65 |
| dual specificity tyrosine-(Y)-phosphorylation regulated kinase 4                     | DYRK4           | 0,65 |
| SERPINE1 mRNA binding protein 1                                                      | SERBP1          | 0,65 |
| tumor protein p53 inducible nuclear protein 1                                        | TP53INP1        | 0,65 |
| elastin microfibril interfacier 2                                                    | EMILIN2         | 0,65 |
| transmembrane protein 169                                                            | TMEM169         | 0,65 |
| neuron navigator 2                                                                   | NAV2            | 0,65 |
| post-GPI attachment to proteins 3                                                    | PGAP3           | 0,65 |
| Transcript Identified by AceView, Entrez Gene ID(s) 375248                           | ANKRD36         | 0,65 |
| trans-golgi network vesicle protein 23 homolog B (S. cerevisiae)                     | TVP23B          | 0,65 |
| nudix hydrolase 18                                                                   | NUDT18          | 0,65 |
| Yip1 domain family member 5                                                          | YIPF5           | 0,65 |
| HLA complex P5 (non-protein coding)                                                  | HCP5            | 0,65 |
| sestrin 3                                                                            | SESN3           | 0,65 |
| prenyl (decaprenyl) diphosphate synthase, subunit 2                                  | PDSS2           | 0,65 |
| ribosomal protein L39; small nucleolar RNA, H/ACA box 69                             | RPL39; SNORA69  | 0,65 |
| pericentriolar material 1                                                            | PCM1            | 0,65 |
| UDP-GlcNAc:betaGal beta-1,3-N-acetylglucosaminyltransferase 2                        | B3GNT2          | 0,65 |
| hemoglobin, zeta                                                                     | HBZ             | 0,65 |
| poly(A) binding protein, cytoplasmic 1; microRNA 7705                                | PABPC1; MIR7705 | 0,65 |
| TBC1 domain family, member 9 (with GRAM domain)                                      | TBC1D9          | 0,65 |
| dual specificity phosphatase 16                                                      | DUSP16          | 0,65 |
| NLR family member X1                                                                 | NLRX1           | 0,65 |
| G protein-coupled receptor 18                                                        | GPR18           | 0,65 |
| glutathione S-transferase alpha 5                                                    | GSTA5           | 0,65 |
| echinoderm microtubule associated protein like 6                                     | EML6            | 0,65 |
| SERTA domain containing 3                                                            | SERTAD3         | 0,64 |
| DnaJ (Hsp40) homolog, subfamily B, member 11                                         | DNAJB11         | 0,64 |
| GTP cyclohydrolase 1                                                                 | GCH1            | 0,64 |
| mitogen-activated protein kinase 3                                                   | MAPK3           | 0,64 |
| RCC1 domain containing 1                                                             | RCCD1           | 0,64 |
| acyl-CoA binding domain containing 7                                                 | ACBD7           | 0,64 |
| interleukin 13 receptor, alpha 1                                                     | IL13RA1         | 0,64 |
| ring finger protein 208                                                              | RNF208          | 0,64 |

|                                                                                                                 |                      |      |
|-----------------------------------------------------------------------------------------------------------------|----------------------|------|
| Zhang2013 ALT_ACCEPTOR, ALT_DONOR, coding, INTERNAL, intronic best transcript NM_030653                         | DDX11                | 0,64 |
| midasin AAA ATPase 1                                                                                            | MDN1                 | 0,64 |
| S100 calcium binding protein A1                                                                                 | S100A1               | 0,64 |
| RAS-like, family 11, member A                                                                                   | RASL11A              | 0,64 |
| zinc finger protein 605                                                                                         | ZNF605               | 0,64 |
| PRAME family member 15; PRAME family member 9                                                                   | PRAMEF15;<br>PRAMEF9 | 0,64 |
| tribbles pseudokinase 2                                                                                         | TRIB2                | 0,64 |
| ribosomal protein L18a                                                                                          | RPL18A               | 0,64 |
| Memczak2013 ANTISENSE, coding, INTERNAL, intronic best transcript NM_001202514                                  | MXD1                 | 0,64 |
| proteasome 26S subunit, ATPase 3                                                                                | PSMC3                | 0,64 |
| SLCO4A1 antisense RNA 1                                                                                         | SLCO4A1-AS1          | 0,64 |
| Zhang2013 ALT_ACCEPTOR, ALT_DONOR, coding, INTERNAL, intronic best transcript NM_002473                         | MYH9                 | 0,64 |
| tet methylcytosine dioxygenase 3                                                                                | TET3                 | 0,64 |
| SWI/SNF-related, matrix-associated actin-dependent regulator of chromatin, subfamily a, containing DEAD/H box 1 | SMARCAD1             | 0,64 |
| cysteine-rich protein 3                                                                                         | CRIP3                | 0,64 |
| PRC1 antisense RNA 1                                                                                            | PRC1-AS1             | 0,64 |
| serpin peptidase inhibitor, clade B (ovalbumin), member 9                                                       | SERPINB9             | 0,64 |
| protein tyrosine phosphatase, receptor type, G                                                                  | PTPRG                | 0,64 |
| zinc finger protein 254                                                                                         | ZNF254               | 0,64 |
| protein regulator of cytokinesis 1                                                                              | PRC1                 | 0,64 |
| Transcript Identified by AceView, Entrez Gene ID(s) 9665                                                        | KIAA0430             | 0,64 |
| integrin alpha 10                                                                                               | ITGA10               | 0,64 |
| proline-rich protein BstNI subfamily 2                                                                          | PRB2                 | 0,64 |
| siah E3 ubiquitin protein ligase 1                                                                              | SIAH1                | 0,64 |
| Transcript Identified by AceView, Entrez Gene ID(s) 11157                                                       | LSM6                 | 0,64 |
| mannosidase, endo-alpha-like                                                                                    | MANEAL               | 0,64 |
| importin 7; small nucleolar RNA, H/ACA box 23                                                                   | IPO7; SNORA23        | 0,64 |
| BLOC-1 related complex subunit 6                                                                                | BORCS6               | 0,64 |
| ATP citrate lyase                                                                                               | ACLY                 | 0,64 |
| Abelson helper integration site 1                                                                               | AHI1                 | 0,64 |
| H3 histone, family 3A; H3 histone, family 3A, pseudogene 4                                                      | H3F3A; H3F3AP4       | 0,64 |
| transducin (beta)-like 2                                                                                        | TBL2                 | 0,64 |
| leucine rich repeat containing 37B                                                                              | LRR37B               | 0,64 |
| Transcript Identified by AceView, Entrez Gene ID(s) 3632                                                        | INPP5A               | 0,64 |

|                                                                                                          |                       |      |
|----------------------------------------------------------------------------------------------------------|-----------------------|------|
| BCL6 corepressor-like 1                                                                                  | BCORL1                | 0,64 |
| phosphodiesterase 3B, cGMP-inhibited                                                                     | PDE3B                 | 0,64 |
| zinc finger, CCHC domain containing 5                                                                    | ZCCHC5                | 0,64 |
| zinc finger and SCAN domain containing 25                                                                | ZSCAN25               | 0,64 |
| serum/glucocorticoid regulated kinase family, member 3                                                   | SGK3                  | 0,64 |
| Memczak2013 ALT_ACCEPTOR, ALT_DONOR, coding, INTERNAL, intronic best transcript NM_006537                | USP3                  | 0,64 |
| solute carrier family 35, member E1                                                                      | SLC35E1               | 0,64 |
| PHD finger protein 3                                                                                     | PHF3                  | 0,64 |
| xeroderma pigmentosum, complementation group A                                                           | XPA                   | 0,64 |
| SH3 domain binding glutamate-rich protein like 2                                                         | SH3BGRL2              | 0,64 |
| kelch-like family member 22                                                                              | KLHL22                | 0,64 |
| spectrin repeat containing, nuclear envelope family member 3                                             | SYNE3                 | 0,64 |
| transmembrane protein 62                                                                                 | TMEM62                | 0,64 |
| protein-L-isoaspartate (D-aspartate) O-methyltransferase domain containing 2                             | PCMTD2                | 0,64 |
| ankyrin repeat domain 36C                                                                                | ANKRD36C              | 0,64 |
| TP53 regulated inhibitor of apoptosis 1                                                                  | TRIAP1                | 0,64 |
| RAD1 checkpoint DNA exonuclease                                                                          | RAD1                  | 0,64 |
| estrogen receptor binding site associated, antigen, 9                                                    | EBAG9                 | 0,64 |
| suppression of tumorigenicity 14 (colon carcinoma)                                                       | ST14                  | 0,64 |
| peroxisomal biogenesis factor 11 beta                                                                    | PEX11B                | 0,64 |
| Salzman2013 ANTISENSE, coding, INTERNAL, intronic, OVERLAPTX best transcript NM_152516; novel transcript | AC018462.2;<br>COMMD1 | 0,64 |
| F-box and leucine-rich repeat protein 17                                                                 | FBXL17                | 0,64 |
| cytochrome P450, family 27, subfamily A, polypeptide 1                                                   | CYP27A1               | 0,64 |
| Meis homeobox 2                                                                                          | MEIS2                 | 0,64 |
| hypoxia up-regulated 1                                                                                   | HYOU1                 | 0,64 |
| polybromo 1                                                                                              | PBRM1                 | 0,64 |
| TM4SF19 antisense RNA 1                                                                                  | TM4SF19-AS1           | 0,64 |
| C1QTNF3-AMACR readthrough (NMD candidate)                                                                | C1QTNF3-AMACR         | 0,64 |
| 3-oxoacyl-ACP synthase, mitochondrial                                                                    | OXSM                  | 0,64 |
| GTPase activating protein (SH3 domain) binding protein 1                                                 | G3BP1                 | 0,64 |
| Transcript Identified by AceView, Entrez Gene ID(s) 221937                                               | FO XK1                | 0,64 |
| superkiller viralicidic activity 2-like 2 (S. cerevisiae)                                                | SKIV2L2               | 0,64 |
| golgi phosphoprotein 3 (coat-protein)                                                                    | GOLPH3                | 0,64 |
| ribosomal protein S21                                                                                    | RPS21                 | 0,64 |
| polypeptide N-acetylgalactosaminyltransferase 16                                                         | GALNT16               | 0,64 |
| dermatan sulfate epimerase                                                                               | DSE                   | 0,64 |
| nucleolar protein 11                                                                                     | NOL11                 | 0,64 |

|                                                                     |                           |      |
|---------------------------------------------------------------------|---------------------------|------|
| phospholipase D1, phosphatidylcholine-specific                      | PLD1                      | 0,64 |
| nuclear receptor interacting protein 1                              | NRIP1                     | 0,64 |
| fibrillarin                                                         | FBL                       | 0,64 |
| tyrosylprotein sulfotransferase 1                                   | TPST1                     | 0,64 |
| serine/threonine kinase 11                                          | STK11                     | 0,64 |
| zinc finger protein 366                                             | ZNF366                    | 0,64 |
| PTPN13-like, Y-linked pseudogene 3                                  | PRYP3                     | 0,64 |
| negative elongation factor complex member B                         | NELFB                     | 0,64 |
| centrin 2                                                           | CETN2                     | 0,64 |
| frizzled-related protein                                            | FRZB                      | 0,64 |
| F-box protein 31                                                    | FBXO31                    | 0,64 |
| zinc finger protein 599                                             | ZNF599                    | 0,64 |
| N-acetylglucosamine-1-phosphodiester alpha-N-acetylglucosaminidase  | NAGPA                     | 0,64 |
| ATPase, class V, type 10D                                           | ATP10D                    | 0,64 |
| cornichon family AMPA receptor auxiliary protein 1                  | CNIH1                     | 0,64 |
| fibroblast growth factor receptor 2                                 | FGFR2                     | 0,64 |
| chromosome 16 open reading frame 70                                 | C16orf70                  | 0,64 |
| adhesion G protein-coupled receptor F3                              | ADGRF3                    | 0,64 |
| RAD21 cohesin complex component; microRNA 3610                      | RAD21; MIR3610            | 0,64 |
| zinc finger CCCH-type containing 12B                                | ZC3H12B                   | 0,64 |
| NADH dehydrogenase (ubiquinone) 1 beta subcomplex, 4, 15kDa         | NDUFB4                    | 0,64 |
| F-box and leucine-rich repeat protein 4                             | FBXL4                     | 0,64 |
| synaptogyrin 1                                                      | SYNGR1                    | 0,64 |
| FSHD region gene 1 family member B, pseudogene                      | FRG1BP                    | 0,64 |
| RAB26, member RAS oncogene family                                   | RAB26                     | 0,64 |
| family with sequence similarity 219, member B                       | FAM219B                   | 0,64 |
| protein O-fucosyltransferase 2                                      | POFUT2                    | 0,64 |
| interferon, omega 1                                                 | IFNW1                     | 0,64 |
| desumoylating isopeptidase 2                                        | DESI2                     | 0,64 |
| histone cluster 2, H2aa3; histone cluster 2, H2aa4                  | HIST2H2AA3;<br>HIST2H2AA4 | 0,64 |
| patched domain containing 3                                         | PTCHD3                    | 0,64 |
| apolipoprotein B mRNA editing enzyme, catalytic polypeptide-like 3G | APOBEC3G                  | 0,64 |
| zinc and ring finger 2, E3 ubiquitin protein ligase                 | ZNRF2                     | 0,64 |
| mitochondrial ribosomal protein S31                                 | MRPS31                    | 0,64 |
| endoplasmic reticulum aminopeptidase 2                              | ERAP2                     | 0,64 |
| interleukin enhancer binding factor 3                               | ILF3                      | 0,64 |
| nuclear factor, erythroid 2-like 2                                  | NFE2L2                    | 0,64 |
| MAF transcriptional regulator RNA                                   | MAFTRR                    | 0,64 |
| dual specificity phosphatase 16                                     | DUSP16                    | 0,64 |

|                                                                                                                                                              |                                              |      |
|--------------------------------------------------------------------------------------------------------------------------------------------------------------|----------------------------------------------|------|
| Jeck2013 ALT_ACCEPTOR, ALT_DONOR, coding, INTERNAL, intronic best transcript NM_001037131; Transcript Identified by AceView                                  | AGAP1; noygloy; torkeybo                     | 0,64 |
| trafficking protein particle complex 6A                                                                                                                      | TRAPPC6A                                     | 0,64 |
| catenin (cadherin-associated protein), delta 1                                                                                                               | CTNND1                                       | 0,64 |
| ELM2 and Myb/SANT-like domain containing 1                                                                                                                   | ELMSAN1                                      | 0,63 |
| pre-mRNA processing factor 8                                                                                                                                 | PRPF8                                        | 0,63 |
| COP9 signalosome subunit 5                                                                                                                                   | COPS5                                        | 0,63 |
| TBC1 domain family, member 5                                                                                                                                 | TBC1D5                                       | 0,63 |
| Eukaryotic translation initiation factor 3 subunit F [Source:UniProtKB/Swiss-Prot;Acc:O00303]                                                                | EIF3F                                        | 0,63 |
| angel homolog 2 (Drosophila)                                                                                                                                 | ANGEL2                                       | 0,63 |
| family with sequence similarity 96, member A                                                                                                                 | FAM96A                                       | 0,63 |
| H2A histone family, member V                                                                                                                                 | H2AFV                                        | 0,63 |
| lysine (K)-specific demethylase 1A; microRNA 3115                                                                                                            | KDM1A; MIR3115                               | 0,63 |
| pleckstrin homology domain containing, family J member 1; microRNA 6789                                                                                      | PLEKHJ1; MIR6789                             | 0,63 |
| contactin associated protein 1                                                                                                                               | CNTNAP1                                      | 0,63 |
| ribosomal protein L7a; small nucleolar RNA, C/D box 36C; small nucleolar RNA, C/D box 36B; small nucleolar RNA, C/D box 24; small nucleolar RNA, C/D box 36A | RPL7A; SNORD36C; SNORD36B; SNORD24; SNORD36A | 0,63 |
| chromosome 21 open reading frame 2                                                                                                                           | C21orf2                                      | 0,63 |
| chromosome 1 open reading frame 210                                                                                                                          | C1orf210                                     | 0,63 |
| collagen, type IV, alpha 6                                                                                                                                   | COL4A6                                       | 0,63 |
| translocase of inner mitochondrial membrane 10 homolog B (yeast)                                                                                             | TIMM10B                                      | 0,63 |
| NDC80 kinetochore complex component                                                                                                                          | NDC80                                        | 0,63 |
| collagen, type III, alpha 1; microRNA 3606                                                                                                                   | COL3A1; MIR3606                              | 0,63 |
| annexin A6                                                                                                                                                   | ANXA6                                        | 0,63 |
| mediator complex subunit 29                                                                                                                                  | MED29                                        | 0,63 |
| phospholysine phosphohistidine inorganic pyrophosphate phosphatase                                                                                           | LHPP                                         | 0,63 |
| F-box protein 22                                                                                                                                             | FBXO22                                       | 0,63 |
| ubiquinol-cytochrome c reductase, Rieske iron-sulfur polypeptide 1                                                                                           | UQCRCF1                                      | 0,63 |
| excision repair cross-complementation group 6-like 2                                                                                                         | ERCC6L2                                      | 0,63 |
| K(lysine) acetyltransferase 6B                                                                                                                               | KAT6B                                        | 0,63 |
| 3-hydroxybutyrate dehydrogenase, type 2                                                                                                                      | BDH2                                         | 0,63 |
| palmitoyl-protein thioesterase 2; EGF-like-domain, multiple 8; PPT2-EGFL8 readthrough (NMD candidate)                                                        | PPT2; EGFL8; PPT2-EGFL8                      | 0,63 |
| mitotic spindle organizing protein 2B                                                                                                                        | MZT2B                                        | 0,63 |
| calsyntenin 1                                                                                                                                                | CLSTN1                                       | 0,63 |



|                                                                                                    |                    |      |
|----------------------------------------------------------------------------------------------------|--------------------|------|
| THAP domain containing 4                                                                           | THAP4              | 0,63 |
| Z-DNA binding protein 1                                                                            | ZBP1               | 0,63 |
| RNA pseudouridylate synthase domain containing 1                                                   | RPUSD1             | 0,63 |
| KAT8 regulatory NSL complex subunit 2; small nucleolar RNA, H/ACA box 2B                           | KANSL2;<br>SNORA2B | 0,63 |
| PHD finger protein 13                                                                              | PHF13              | 0,63 |
| U2 snRNP-associated SURP domain containing                                                         | U2SURP             | 0,63 |
| zinc finger protein 174                                                                            | ZNF174             | 0,63 |
| kringle containing transmembrane protein 1                                                         | KREMEN1            | 0,63 |
| coiled-coil domain containing 170                                                                  | CCDC170            | 0,63 |
| ATP binding cassette subfamily C member 12                                                         | ABCC12             | 0,63 |
| SUMO1/sentrin specific peptidase 6                                                                 | SENP6              | 0,63 |
| phosphoribosyl pyrophosphate synthetase-associated protein 2                                       | PRPSAP2            | 0,63 |
| intercellular adhesion molecule 1                                                                  | ICAM1              | 0,63 |
| nuclear cap binding protein subunit 1                                                              | NCBP1              | 0,63 |
| bromodomain and WD repeat domain containing 3                                                      | BRWD3              | 0,63 |
| alpha-methylacyl-CoA racemase                                                                      | AMACR              | 0,63 |
| leucine rich repeat transmembrane neuronal 4                                                       | LRRTM4             | 0,63 |
| TM2 domain containing 3                                                                            | TM2D3              | 0,63 |
| LSM14A mRNA processing body assembly factor                                                        | LSM14A             | 0,63 |
| post-GPI attachment to proteins 1                                                                  | PGAP1              | 0,63 |
| dimethylarginine dimethylaminohydrolase 1                                                          | DDAH1              | 0,63 |
| endoplasmic reticulum metallopeptidase 1                                                           | ERMP1              | 0,63 |
| sorting nexin 7                                                                                    | SNX7               | 0,63 |
| zinc finger protein 624                                                                            | ZNF624             | 0,63 |
| dihydrolipoamide dehydrogenase                                                                     | DLD                | 0,63 |
| WD repeat containing planar cell polarity effector                                                 | WDPCP              | 0,63 |
| lactotransferrin                                                                                   | LTF                | 0,63 |
| Memczak2013 ALT_ACCEPTOR, ALT_DONOR, coding, INTERNAL, intronic best transcript NM_001174072       | SERINC5            | 0,63 |
| ARHGAP19-SLIT1 readthrough (NMD candidate)                                                         | ARHGAP19-SLIT1     | 0,63 |
| synaptonemal complex protein 3                                                                     | SYCP3              | 0,63 |
| MON2 homolog, regulator of endosome-to-Golgi trafficking                                           | MON2               | 0,63 |
| hydroxymethylbilane synthase                                                                       | HMBS               | 0,63 |
| lysosomal-associated membrane protein 2                                                            | LAMP2              | 0,63 |
| chromosome 8 open reading frame 82; leucine rich repeat containing 24                              | C8orf82; LRRC24    | 0,63 |
| TAF6-like RNA polymerase II, p300/CBP-associated factor (PCAF)-associated factor, 65kDa            | TAF6L              | 0,63 |
| Zhang2013 ALT_ACCEPTOR, ALT_DONOR, coding, INTERNAL, intronic, OVERLAPTX best transcript NM_002140 | HNRNPK             | 0,63 |
| junctional adhesion molecule 3                                                                     | JAM3               | 0,63 |

|                                                                                        |           |      |
|----------------------------------------------------------------------------------------|-----------|------|
| family with sequence similarity 151, member A                                          | FAM151A   | 0,63 |
| histone cluster 1, H3a                                                                 | HIST1H3A  | 0,63 |
| mitochondrial ribosomal protein L34                                                    | MRPL34    | 0,63 |
| exportin 7                                                                             | XPO7      | 0,63 |
| Transcript Identified by AceView, Entrez Gene ID(s) 26009                              | ZZZ3      | 0,63 |
| forkhead box A1                                                                        | FOXA1     | 0,63 |
| talin 2                                                                                | TLN2      | 0,63 |
| adenosylhomocysteinase-like 2                                                          | AHCYL2    | 0,63 |
| CTD small phosphatase like 2                                                           | CTDSPL2   | 0,63 |
| SUZ12 polycomb repressive complex 2 subunit                                            | SUZ12     | 0,63 |
| MYC binding protein 2, E3 ubiquitin protein ligase                                     | MYCBP2    | 0,63 |
| coiled-coil domain containing 68                                                       | CCDC68    | 0,63 |
| tumor necrosis factor (ligand) superfamily, member 14                                  | TNFSF14   | 0,63 |
| LSM family member 14B                                                                  | LSM14B    | 0,63 |
| olfactomedin like 1                                                                    | OLFML1    | 0,63 |
| BCL2/adenovirus E1B 19kD interacting protein like                                      | BNIPL     | 0,63 |
| excision repair cross-complementation group 2                                          | ERCC2     | 0,63 |
| DIRAS family, GTP-binding RAS-like 1                                                   | DIRAS1    | 0,63 |
| protein serine kinase H1                                                               | PSKH1     | 0,63 |
| serine/threonine protein kinase 26                                                     | STK26     | 0,63 |
| mitochondrial ribosomal protein S34                                                    | MRPS34    | 0,63 |
| DOT1-like histone H3K79 methyltransferase                                              | DOT1L     | 0,63 |
| M-phase specific PLK1 interacting protein                                              | MPLKIP    | 0,63 |
| mitochondrial ribosomal protein L12                                                    | MRPL12    | 0,63 |
| solute carrier family 35 (UDP-N-acetylglucosamine (UDP-GlcNAc) transporter), member A3 | SLC35A3   | 0,63 |
| ADP-dependent glucokinase                                                              | ADPGK     | 0,63 |
| frataxin                                                                               | FXN       | 0,63 |
| oligosaccharyltransferase complex subunit pseudogene 1                                 | OSTCP1    | 0,63 |
| cytochrome P450, family 21, subfamily A, polypeptide 2                                 | CYP21A2   | 0,63 |
| fibrillarin                                                                            | FBL       | 0,63 |
| GRB2-associated binding protein 1                                                      | GAB1      | 0,63 |
| small EDRK-rich factor 2                                                               | SERF2     | 0,63 |
| C1GALT1 specific chaperone 1                                                           | C1GALT1C1 | 0,63 |
| arsenite methyltransferase                                                             | AS3MT     | 0,63 |
| chromosome 19 open reading frame 12                                                    | C19orf12  | 0,63 |
| transmembrane anterior posterior transformation 1                                      | TAPT1     | 0,63 |
| zinc finger protein 572                                                                | ZNF572    | 0,63 |
| teratocarcinoma-derived growth factor 1                                                | TDGF1     | 0,63 |
| biorientation of chromosomes in cell division 1                                        | BOD1      | 0,63 |
| Ewing tumor-associated antigen 1                                                       | ETAA1     | 0,63 |
| enoyl-CoA delta isomerase 1                                                            | ECI1      | 0,62 |
| ring-box 1, E3 ubiquitin protein ligase                                                | RBX1      | 0,62 |

|                                                                                                                                                                                                                                                                                                                                                                               |                          |      |
|-------------------------------------------------------------------------------------------------------------------------------------------------------------------------------------------------------------------------------------------------------------------------------------------------------------------------------------------------------------------------------|--------------------------|------|
| hypoxia up-regulated 1                                                                                                                                                                                                                                                                                                                                                        | HYOU1                    | 0,62 |
| follistatin-like 4                                                                                                                                                                                                                                                                                                                                                            | FSTL4                    | 0,62 |
| vacuolar protein sorting 37 homolog D (S. cerevisiae)                                                                                                                                                                                                                                                                                                                         | VPS37D                   | 0,62 |
| LPS-responsive vesicle trafficking, beach and anchor containing                                                                                                                                                                                                                                                                                                               | LRBA                     | 0,62 |
| transmembrane protein 94; microRNA 6785                                                                                                                                                                                                                                                                                                                                       | TMEM94;<br>MIR6785       | 0,62 |
| AT rich interactive domain 3A (BRIGHT-like)                                                                                                                                                                                                                                                                                                                                   | ARID3A                   | 0,62 |
| mitogen-activated protein kinase kinase 7                                                                                                                                                                                                                                                                                                                                     | MAP2K7                   | 0,62 |
| D-aspartate oxidase                                                                                                                                                                                                                                                                                                                                                           | DDO                      | 0,62 |
| meiosis-specific nuclear structural 1                                                                                                                                                                                                                                                                                                                                         | MNS1                     | 0,62 |
| ADP-ribosylation factor like GTPase 17B                                                                                                                                                                                                                                                                                                                                       | ARL17B                   | 0,62 |
| ER degradation enhancer, mannosidase alpha-like 3                                                                                                                                                                                                                                                                                                                             | EDEM3                    | 0,62 |
| KIAA1586                                                                                                                                                                                                                                                                                                                                                                      | KIAA1586                 | 0,62 |
| ankyrin repeat and SOCS box containing 3                                                                                                                                                                                                                                                                                                                                      | ASB3                     | 0,62 |
| coiled-coil domain containing 69                                                                                                                                                                                                                                                                                                                                              | CCDC69                   | 0,62 |
| interleukin 19                                                                                                                                                                                                                                                                                                                                                                | IL19                     | 0,62 |
| mitochondrial ribosomal protein L57                                                                                                                                                                                                                                                                                                                                           | MRPL57                   | 0,62 |
| tyrosine kinase 2                                                                                                                                                                                                                                                                                                                                                             | TYK2                     | 0,62 |
| phosphatidylinositol-4-phosphate 3-kinase, catalytic subunit type 2 beta                                                                                                                                                                                                                                                                                                      | PIK3C2B                  | 0,62 |
| secretory carrier membrane protein 5                                                                                                                                                                                                                                                                                                                                          | SCAMP5                   | 0,62 |
| frizzled class receptor 9                                                                                                                                                                                                                                                                                                                                                     | FZD9                     | 0,62 |
| Rho GTPase activating protein 44                                                                                                                                                                                                                                                                                                                                              | ARHGAP44                 | 0,62 |
| Transcript Identified by AceView, Entrez Gene ID(s) 84267                                                                                                                                                                                                                                                                                                                     | C9orf64                  | 0,62 |
| inositol-tetrakisphosphate 1-kinase                                                                                                                                                                                                                                                                                                                                           | ITPK1                    | 0,62 |
| TGF-beta activated kinase 1/MAP3K7 binding protein 1                                                                                                                                                                                                                                                                                                                          | TAB1                     | 0,62 |
| long intergenic non-protein coding RNA 1578                                                                                                                                                                                                                                                                                                                                   | LINC01578                | 0,62 |
| C2 calcium-dependent domain containing 5                                                                                                                                                                                                                                                                                                                                      | C2CD5                    | 0,62 |
| Transcript Identified by AceView, Entrez Gene ID(s) 51008                                                                                                                                                                                                                                                                                                                     | ASCC1                    | 0,62 |
| MPN domain containing                                                                                                                                                                                                                                                                                                                                                         | MPND                     | 0,62 |
| lysosomal-associated membrane protein family, member 5                                                                                                                                                                                                                                                                                                                        | LAMP5                    | 0,62 |
| Homo sapiens H3 histone, family 3A, pseudogene 4 (H3F3AP4), non-coding RNA.; Homo sapiens H3 histone, family 3A, mRNA (cDNA clone MGC:47761 IMAGE:6014954), complete cds.; Homo sapiens H3 histone, family 3B (H3.3B), mRNA (cDNA clone MGC:87782 IMAGE:3884607), complete cds.; Homo sapiens H3 histone, family 3A, mRNA (cDNA clone MGC:87783 IMAGE:5162817), complete cds. | H3F3AP4; H3F3A;<br>H3F3B | 0,62 |
| enkurin domain containing 1                                                                                                                                                                                                                                                                                                                                                   | ENKD1                    | 0,62 |
| SAYSVFN motif domain containing 1                                                                                                                                                                                                                                                                                                                                             | SAYSD1                   | 0,62 |

|                                                                              |                |      |
|------------------------------------------------------------------------------|----------------|------|
| bromodomain containing 1                                                     | BRD1           | 0,62 |
| HEAT repeat containing 3                                                     | HEATR3         | 0,62 |
| ribosomal protein L7a                                                        | RPL7A          | 0,62 |
| NIMA-related kinase 9                                                        | NEK9           | 0,62 |
| myosin light chain 6B                                                        | MYL6B          | 0,62 |
| ATP synthase, H+ transporting, mitochondrial Fo complex subunit s (factor B) | ATP5S          | 0,62 |
| MDM2 binding protein                                                         | MTBP           | 0,62 |
| family with sequence similarity 210, member B                                | FAM210B        | 0,62 |
| ribosomal protein S16                                                        | RPS16          | 0,62 |
| zinc finger protein 131                                                      | ZNF131         | 0,62 |
| zinc finger protein 546                                                      | ZNF546         | 0,62 |
| plakophilin 2                                                                | PKP2           | 0,62 |
| collagen, type VIII, alpha 1                                                 | COL8A1         | 0,62 |
| NADPH oxidase 3                                                              | NOX3           | 0,62 |
| tetratricopeptide repeat domain 8                                            | TTC8           | 0,62 |
| SET binding protein 1                                                        | SETBP1         | 0,62 |
| spectrin repeat containing, nuclear envelope family member 4                 | SYNE4          | 0,62 |
| isoamyl acetate-hydrolyzing esterase 1 homolog                               | IAH1           | 0,62 |
| ribosomal protein L31                                                        | RPL31          | 0,62 |
| transmembrane protein, adipocyte associated 1                                | TPRA1          | 0,62 |
| solute carrier family 26 (anion exchanger), member 5                         | SLC26A5        | 0,62 |
| spindlin family, member 3                                                    | SPIN3          | 0,62 |
| B-cell scaffold protein with ankyrin repeats 1                               | BANK1          | 0,62 |
| PIH1 domain containing 1                                                     | PIH1D1         | 0,62 |
| family with sequence similarity 195, member A                                | FAM195A        | 0,62 |
| hes family bHLH transcription factor 6                                       | HES6           | 0,62 |
| inositol polyphosphate-1-phosphatase                                         | INPP1          | 0,62 |
| ankyrin repeat domain 10                                                     | ANKRD10        | 0,62 |
| KIAA1958                                                                     | KIAA1958       | 0,62 |
| protein arginine methyltransferase 6                                         | PRMT6          | 0,62 |
| activin A receptor type IIA                                                  | ACVR2A         | 0,62 |
| single-pass membrane protein with aspartate-rich tail 1                      | SMDT1          | 0,62 |
| FXYP domain containing ion transport regulator 3; microRNA 6887              | FXYP3; MIR6887 | 0,62 |
| armadillo repeat containing, X-linked 3                                      | ARMCX3         | 0,62 |
| nitric oxide associated 1                                                    | NOA1           | 0,62 |
| taste receptor, type 2, member 10                                            | TAS2R10        | 0,62 |
| PMS1 homolog 1, mismatch repair system component                             | PMS1           | 0,62 |
| cadherin-related family member 3                                             | CDHR3          | 0,62 |
| ankyrin repeat and sterile alpha motif domain containing 1B                  | ANKS1B         | 0,62 |
| zinc finger protein 700                                                      | ZNF700         | 0,62 |

|                                                                                                                                             |                                  |      |
|---------------------------------------------------------------------------------------------------------------------------------------------|----------------------------------|------|
| leucine-rich repeats and immunoglobulin-like domains 2                                                                                      | LRIG2                            | 0,62 |
| ribonuclease H2, subunit A                                                                                                                  | RNASEH2A                         | 0,62 |
| uncharacterized LOC100130691; Transcript Identified by AceView, Entrez Gene ID(s) 100130691; 4780, RefSeq ID(s) NR_026966; novel transcript | LOC100130691; AC074286.1; NFE2L2 | 0,62 |
| forkhead box A2                                                                                                                             | FOXA2                            | 0,62 |
| Fanconi anemia complementation group M                                                                                                      | FANCM                            | 0,62 |
| period circadian clock 2                                                                                                                    | PER2                             | 0,62 |
| erythrocyte membrane protein band 4.1 like 4B                                                                                               | EPB41L4B                         | 0,62 |
| centrosomal protein 63kDa                                                                                                                   | CEP63                            | 0,62 |
| SAC1 suppressor of actin mutations 1-like (yeast)                                                                                           | SACM1L                           | 0,62 |
| sarcoglycan zeta                                                                                                                            | SGCZ                             | 0,62 |
| transducin-like enhancer of split 4                                                                                                         | TLE4                             | 0,62 |
| proline rich 11                                                                                                                             | PRR11                            | 0,62 |
| eukaryotic translation initiation factor 1A, X-linked                                                                                       | EIF1AX                           | 0,62 |
| exosome component 8                                                                                                                         | EXOSC8                           | 0,62 |
| defensin, beta 133                                                                                                                          | DEFB133                          | 0,62 |
| phosphoglycerate mutase family member 4                                                                                                     | PGAM4                            | 0,62 |
| ALG11, alpha-1,2-mannosyltransferase; UTP14, U3 small nucleolar ribonucleoprotein, homolog C (yeast)                                        | ALG11; UTP14C                    | 0,62 |
| transmembrane and coiled-coil domains 4                                                                                                     | TMCO4                            | 0,62 |
| amyloid beta (A4) precursor protein                                                                                                         | APP                              | 0,62 |
| nudix hydrolase 21                                                                                                                          | NUDT21                           | 0,62 |
| X-ray repair complementing defective repair in Chinese hamster cells 1                                                                      | XRCC1                            | 0,62 |
| calpain 12                                                                                                                                  | CAPN12                           | 0,62 |
| magnesium transporter 1                                                                                                                     | MAGT1                            | 0,62 |
| ARP8 actin-related protein 8 homolog (yeast)                                                                                                | ACTR8                            | 0,62 |
| secreted frizzled-related protein 4                                                                                                         | SFRP4                            | 0,62 |
| A kinase (PRKA) anchor protein 5                                                                                                            | AKAP5                            | 0,62 |
|                                                                                                                                             | LRIG1                            | 0,62 |
| argonaute RISC catalytic component 3                                                                                                        | ago-03                           | 0,62 |
| BCDIN3 domain containing                                                                                                                    | BCDIN3D                          | 0,62 |
| olfactory receptor, family 6, subfamily P, member 1                                                                                         | OR6P1                            | 0,62 |
| N-deacetylase/N-sulfotransferase (heparan glucosaminyl) 1                                                                                   | NDST1                            | 0,62 |
| zinc finger protein 547; trafficking protein particle complex 2B; trafficking protein particle complex 2                                    | ZNF547; TRAPPC2B; TRAPPC2        | 0,62 |
| IKBKB interacting protein                                                                                                                   | IKBIP                            | 0,62 |
| zw10 kinetochore protein                                                                                                                    | ZW10                             | 0,61 |
| coiled-coil domain containing 180                                                                                                           | CCDC180                          | 0,61 |
| proline-rich nuclear receptor coactivator 2                                                                                                 | PNRC2                            | 0,61 |
| propionyl-CoA carboxylase beta subunit                                                                                                      | PCCB                             | 0,61 |

|                                                                                                  |         |      |
|--------------------------------------------------------------------------------------------------|---------|------|
| ribosomal protein S25                                                                            | RPS25   | 0,61 |
| kinectin 1 (kinesin receptor)                                                                    | KTN1    | 0,61 |
| polymerase (RNA) III (DNA directed) polypeptide E (80kD)                                         | POLR3E  | 0,61 |
| ZFP41 zinc finger protein                                                                        | ZFP41   | 0,61 |
| mediator complex subunit 22                                                                      | MED22   | 0,61 |
| leucine-rich repeats and IQ motif containing 3                                                   | LRRIQ3  | 0,61 |
| RNA binding motif protein 4B                                                                     | RBM4B   | 0,61 |
| peroxiredoxin 2                                                                                  | PRDX2   | 0,61 |
| carnitine palmitoyltransferase 1B (muscle)                                                       | CPT1B   | 0,61 |
| euchromatic histone-lysine N-methyltransferase 2                                                 | EHMT2   | 0,61 |
| adenosine deaminase, RNA-specific, B1                                                            | ADARB1  | 0,61 |
| acyl-CoA dehydrogenase, C-4 to C-12 straight chain                                               | ACADM   | 0,61 |
| PAP associated domain containing 7                                                               | PAPD7   | 0,61 |
| interferon, alpha-inducible protein 6                                                            | IFI6    | 0,61 |
| Eukaryotic translation initiation factor 3 subunit F<br>[Source:UniProtKB/Swiss-Prot;Acc:O00303] | EIF3F   | 0,61 |
| DEAD (Asp-Glu-Ala-Asp) box helicase 3, X-linked                                                  | DDX3X   | 0,61 |
| ATPase family, AAA domain containing 3B                                                          | ATAD3B  | 0,61 |
| solute carrier family 6 (neurotransmitter transporter),<br>member 4                              | SLC6A4  | 0,61 |
| electron-transfer-flavoprotein, alpha polypeptide                                                | ETFA    | 0,61 |
| ankyrin repeat domain 36                                                                         | ANKRD36 | 0,61 |
| homeobox A3                                                                                      | HOXA3   | 0,61 |
| abhydrolase domain containing 8                                                                  | ABHD8   | 0,61 |
| anaphase promoting complex subunit 2                                                             | ANAPC2  | 0,61 |
| phosphatidylinositol glycan anchor biosynthesis class L                                          | PIGL    | 0,61 |
| mitochondrial elongation factor 1                                                                | MIEF1   | 0,61 |
| ECSIT signalling integrator                                                                      | ECSIT   | 0,61 |
| SEC22 homolog B, vesicle trafficking protein<br>(gene/pseudogene)                                | SEC22B  | 0,61 |
| solute carrier family 27 (fatty acid transporter), member<br>2                                   | SLC27A2 | 0,61 |
| zinc finger protein 770                                                                          | ZNF770  | 0,61 |
| soosondowah ankyrin repeat domain family member A                                                | SOWAHA  | 0,61 |
| zinc finger, HIT-type containing 3                                                               | ZNHIT3  | 0,61 |
| sideroflexin 4                                                                                   | SFXN4   | 0,61 |
| ceramide kinase                                                                                  | CERK    | 0,61 |
| Finkel-Biskis-Reilly murine sarcoma virus (FBR-MuSV)<br>ubiquitously expressed                   | FAU     | 0,61 |
| TNF receptor-associated protein 1                                                                | TRAP1   | 0,61 |
| family with sequence similarity 229, member B                                                    | FAM229B | 0,61 |
| Jeck2013 ALT_ACCEPTOR, ALT_DONOR, coding,<br>INTERNAL, intronic best transcript NM_004307        | APBB2   | 0,61 |

|                                                                                                                                       |                                             |      |
|---------------------------------------------------------------------------------------------------------------------------------------|---------------------------------------------|------|
| minichromosome maintenance 9 homologous recombination repair factor                                                                   | MCM9                                        | 0,61 |
| mitochondrial ribosomal protein L11                                                                                                   | MRPL11                                      | 0,61 |
| nudix hydrolase 7                                                                                                                     | NUDT7                                       | 0,61 |
| Rap guanine nucleotide exchange factor 4                                                                                              | RAPGEF4                                     | 0,61 |
| F-box protein 38                                                                                                                      | FBXO38                                      | 0,61 |
| zinc finger protein 660                                                                                                               | ZNF660                                      | 0,61 |
| trans-2,3-enoyl-CoA reductase; microRNA 639                                                                                           | TECR; MIR639                                | 0,61 |
| HIV-1 Tat specific factor 1                                                                                                           | HTATSF1                                     | 0,61 |
| DnaJ (Hsp40) homolog, subfamily C, member 4                                                                                           | DNAJC4                                      | 0,61 |
| HIRA interacting protein 3                                                                                                            | HIRIP3                                      | 0,61 |
| olfactory receptor, family 2, subfamily J, member 3                                                                                   | OR2J3                                       | 0,61 |
| acylphosphatase 2, muscle type                                                                                                        | ACYP2                                       | 0,61 |
| v-myc avian myelocytomatosis viral oncogene homolog                                                                                   | MYC                                         | 0,61 |
| small nuclear RNA activating complex polypeptide 2                                                                                    | SNAPC2                                      | 0,61 |
| mitochondrial assembly of ribosomal large subunit 1                                                                                   | MALSU1                                      | 0,61 |
| methyltransferase like 17                                                                                                             | METTL17                                     | 0,61 |
| WNK lysine deficient protein kinase 3                                                                                                 | WNK3                                        | 0,61 |
| ankyrin repeat and KH domain containing 1; eukaryotic translation initiation factor 4E binding protein 3; ANKHD1-EIF4EBP3 readthrough | ANKHD1;<br>EIF4EBP3;<br>ANKHD1-<br>EIF4EBP3 | 0,61 |
| COP9 signalosome subunit 4                                                                                                            | COPS4                                       | 0,61 |
| SAMM50 sorting and assembly machinery component                                                                                       | SAMM50                                      | 0,61 |
| SAGA complex associated factor 29                                                                                                     | SGF29                                       | 0,61 |
| zinc finger protein 852                                                                                                               | ZNF852                                      | 0,61 |
| LON peptidase N-terminal domain and ring finger 1                                                                                     | LONRF1                                      | 0,61 |
| transmembrane protein 27                                                                                                              | TMEM27                                      | 0,61 |
| mortality factor 4 like 1                                                                                                             | MORF4L1                                     | 0,61 |
| transformer 2 beta homolog (Drosophila)                                                                                               | TRA2B                                       | 0,61 |
| DnaJ (Hsp40) homolog, subfamily C, member 14                                                                                          | DNAJC14                                     | 0,61 |
| mastermind-like transcriptional coactivator 2                                                                                         | MAML2                                       | 0,61 |
| NADH dehydrogenase (ubiquinone) 1 alpha subcomplex, 11, 14.7kDa                                                                       | NDUFA11                                     | 0,61 |
| golgin A2                                                                                                                             | GOLGA2                                      | 0,61 |
| receptor-interacting serine-threonine kinase 4                                                                                        | RIPK4                                       | 0,61 |
| succinate dehydrogenase complex assembly factor 4                                                                                     | SDHAF4                                      | 0,61 |
| DBF4 zinc finger                                                                                                                      | DBF4                                        | 0,61 |
| TAP binding protein (tapasin)                                                                                                         | TAPBP                                       | 0,61 |
| transmembrane protein 38A                                                                                                             | TMEM38A                                     | 0,61 |
| CHURC1-FNTB readthrough                                                                                                               | CHURC1-FNTB                                 | 0,61 |
| nuclear prelamin A recognition factor-like                                                                                            | NARFL                                       | 0,61 |
| fibrillarin                                                                                                                           | FBL                                         | 0,61 |
| dymeclin                                                                                                                              | DYM                                         | 0,61 |
| hypoxia up-regulated 1                                                                                                                | HYOU1                                       | 0,61 |

|                                                                                         |                     |      |
|-----------------------------------------------------------------------------------------|---------------------|------|
| enoyl-CoA hydratase, short chain, 1, mitochondrial                                      | ECHS1               | 0,61 |
| protein disulfide isomerase family A member 3                                           | PDIA3               | 0,61 |
| nudix hydrolase 16 like 1                                                               | NUDT16L1            | 0,61 |
| NIMA-related kinase 10                                                                  | NEK10               | 0,61 |
| protein phosphatase 1, regulatory subunit 8                                             | PPP1R8              | 0,61 |
| nuclear receptor coactivator 5                                                          | NCOA5               | 0,61 |
| GPR75-ASB3 readthrough                                                                  | GPR75-ASB3          | 0,61 |
| synaptotagmin VII                                                                       | SYT7                | 0,61 |
| histone cluster 1, H2bd                                                                 | HIST1H2BD           | 0,61 |
| kallikrein B1                                                                           | KLKB1               | 0,61 |
| diacylglycerol kinase, delta 130kDa                                                     | DGKD                | 0,61 |
| Transcript Identified by AceView, Entrez Gene ID(s) 6764                                | ST5                 | 0,61 |
| FANCD2/FANCI-associated nuclease 1                                                      | FAN1                | 0,60 |
| hect domain and RLD 2 pseudogene 2                                                      | HERC2P2             | 0,60 |
| NCBP2 antisense RNA 2 (head to head)                                                    | NCBP2-AS2           | 0,60 |
| peptidase (mitochondrial processing) beta                                               | PMPCB               | 0,60 |
| Transcript Identified by AceView, Entrez Gene ID(s) 10915                               | TCERG1              | 0,60 |
| endonuclease V                                                                          | ENDOV               | 0,60 |
| ADP-ribosylation factor guanine nucleotide-exchange factor 1 (brefeldin A-inhibited)    | ARFGEF1             | 0,60 |
| MIS18 binding protein 1                                                                 | MIS18BP1            | 0,60 |
| transforming growth factor beta receptor III like                                       | TGFBR3L             | 0,60 |
| zinc finger protein 594                                                                 | ZNF594              | 0,60 |
| CENPB DNA-binding domain containing 1                                                   | CENPBD1             | 0,60 |
| atlastin GTPase 2                                                                       | ATL2                | 0,60 |
| integrator complex subunit 9                                                            | INTS9               | 0,60 |
| scavenger receptor class B, member 1                                                    | SCARB1              | 0,60 |
| solute carrier family 16 (monocarboxylate transporter), member 3; microRNA 6787         | SLC16A3;<br>MIR6787 | 0,60 |
| NADH dehydrogenase (ubiquinone) 1 beta subcomplex, 10, 22kDa                            | NDUFB10             | 0,60 |
| zinc finger protein 781                                                                 | ZNF781              | 0,60 |
| Transcript Identified by AceView, Entrez Gene ID(s) 26249                               | KLHL3               | 0,60 |
| KIAA1257                                                                                | KIAA1257            | 0,60 |
| transmembrane protein 91                                                                | TMEM91              | 0,60 |
| golgi reassembly stacking protein 1                                                     | GORASP1             | 0,60 |
| Zhang2013 ALT_ACCEPTOR, ALT_DONOR, coding, INTERNAL, intronic best transcript NM_182706 | SCRIB               | 0,60 |
| interferon gamma receptor 2 (interferon gamma transducer 1)                             | IFNGR2              | 0,60 |
| amelogenin, Y-linked                                                                    | AMELY               | 0,60 |
| quiescin Q6 sulfhydryl oxidase 2                                                        | QSOX2               | 0,60 |



|                                                                                                                           |                          |      |
|---------------------------------------------------------------------------------------------------------------------------|--------------------------|------|
| cyclin-dependent kinase 2                                                                                                 | CDK2                     | 0,60 |
| translational activator of mitochondrially encoded cytochrome c oxidase I                                                 | TACO1                    | 0,60 |
| chromatin accessibility complex 1                                                                                         | CHRA1                    | 0,60 |
| serine hydroxymethyltransferase 2 (mitochondrial)                                                                         | SHMT2                    | 0,60 |
| zinc finger protein 606                                                                                                   | ZNF606                   | 0,60 |
| Rap guanine nucleotide exchange factor 5                                                                                  | RAPGEF5                  | 0,60 |
| myosin IG                                                                                                                 | MYO1G                    | 0,60 |
| vacuolar protein sorting 13 homolog A (S. cerevisiae)                                                                     | VPS13A                   | 0,60 |
| mesoderm development candidate 2                                                                                          | MESDC2                   | 0,60 |
| high mobility group box 3                                                                                                 | HMGB3                    | 0,60 |
| zinc finger, CCHC domain containing 13                                                                                    | ZCCHC13                  | 0,60 |
| HECT domain containing E3 ubiquitin protein ligase 1                                                                      | HECTD1                   | 0,60 |
| F-box and WD repeat domain containing 5                                                                                   | FBXW5                    | 0,60 |
| ATP binding cassette subfamily B member 6 (Langereis blood group)                                                         | ABCB6                    | 0,60 |
| high mobility group 20B                                                                                                   | HMG20B                   | 0,60 |
| REX4 homolog, 3'-5' exonuclease [Source:HGNC Symbol;Acc:HGNC:12820]                                                       | REXO4                    | 0,60 |
| opioid growth factor receptor                                                                                             | OGFR                     | 0,60 |
| Rho GTPase activating protein 19                                                                                          | ARHGAP19                 | 0,60 |
| tudor domain containing 3                                                                                                 | TDRD3                    | 0,60 |
| tetratricopeptide repeat domain 33                                                                                        | TTC33                    | 0,60 |
| transcription elongation factor A (SII)-like 8                                                                            | TCEAL8                   | 0,60 |
| seven transmembrane helix receptor; Transcript Identified by AceView, Entrez Gene ID(s) 650293, RefSeq ID(s) NM_001040071 | LOC650293                | 0,60 |
| chromosome 22 open reading frame 46                                                                                       | C22orf46                 | 0,60 |
| LYR motif containing 7                                                                                                    | LYRM7                    | 0,60 |
| tudor domain containing 7                                                                                                 | TDRD7                    | 0,60 |
| bora, aurora kinase A activator                                                                                           | BORA                     | 0,60 |
| NADH dehydrogenase (ubiquinone) 1 beta subcomplex, 8, 19kDa                                                               | NDUFB8                   | 0,60 |
| glucosamine-phosphate N-acetyltransferase 1                                                                               | GNPNAT1                  | 0,60 |
| E74-like factor 3 (ets domain transcription factor, epithelial-specific )                                                 | ELF3                     | 0,60 |
| protein O-fucosyltransferase 1; microRNA 1825                                                                             | POFUT1;<br>MIR1825       | 0,60 |
| ribosomal protein SA; small nucleolar RNA, H/ACA box 62; small nucleolar RNA, H/ACA box 6                                 | RPSA; SNORA62;<br>SNORA6 | 0,60 |
| transmembrane protease, serine 11D                                                                                        | TMPRSS11D                | 0,60 |
| Transcript Identified by AceView, Entrez Gene ID(s) 6904                                                                  | TBCD                     | 0,60 |
| SEC11 homolog A, signal peptidase complex subunit                                                                         | SEC11A                   | 0,60 |

|                                                                                                                                                                                                                                                                                    |                   |      |
|------------------------------------------------------------------------------------------------------------------------------------------------------------------------------------------------------------------------------------------------------------------------------------|-------------------|------|
| aryl-hydrocarbon receptor repressor; programmed cell death 6                                                                                                                                                                                                                       | AHRR; PDCD6       | 0,60 |
| ZXD family zinc finger C                                                                                                                                                                                                                                                           | ZXDC              | 0,60 |
| glutathione peroxidase 4                                                                                                                                                                                                                                                           | GPX4              | 0,60 |
| transducer of ERBB2, 1                                                                                                                                                                                                                                                             | TOB1              | 0,60 |
| purinergic receptor P2Y, G-protein coupled, 8                                                                                                                                                                                                                                      | P2RY8             | 0,60 |
| Homo sapiens purinergic receptor P2Y, G-protein coupled, 8 (P2RY8), mRNA.; purinergic receptor P2Y, G-protein coupled, 8 [Source:HGNC Symbol;Acc:HGNC:15524]; Homo sapiens purinergic receptor P2Y, G-protein coupled, 8, mRNA (cDNA clone MGC:50878 IMAGE:5787268), complete cds. | P2RY8             | 0,60 |
| laminin, gamma 1 (formerly LAMB2)                                                                                                                                                                                                                                                  | LAMC1             | 0,60 |
| GINS complex subunit 2 (Psf2 homolog)                                                                                                                                                                                                                                              | GINS2             | 0,60 |
| Bcl2 modifying factor                                                                                                                                                                                                                                                              | BMF               | 0,60 |
| pyrophosphatase (inorganic) 1                                                                                                                                                                                                                                                      | PPA1              | 0,60 |
| nudix hydrolase 6                                                                                                                                                                                                                                                                  | NUDT6             | 0,60 |
| FK506 binding protein 8                                                                                                                                                                                                                                                            | FKBP8             | 0,60 |
| adaptor-related protein complex 4, mu 1 subunit                                                                                                                                                                                                                                    | AP4M1             | 0,60 |
| zinc finger protein 133                                                                                                                                                                                                                                                            | ZNF133            | 0,60 |
| zinc finger protein 497; alpha-1-B glycoprotein                                                                                                                                                                                                                                    | ZNF497; A1BG      | 0,60 |
| BIVM-ERCC5 readthrough                                                                                                                                                                                                                                                             | BIVM-ERCC5        | 0,60 |
| olfactory receptor, family 2, subfamily C, member 1                                                                                                                                                                                                                                | OR2C1             | 0,60 |
| hepatitis A virus cellular receptor 1                                                                                                                                                                                                                                              | HAVCR1            | 0,60 |
| Jeck2013 ALT_ACCEPTOR, ALT_DONOR, coding, INTERNAL, intronic best transcript NM_001167740                                                                                                                                                                                          | SMYD3             | 0,60 |
| REX4 homolog, 3'-5' exonuclease [Source:HGNC Symbol;Acc:HGNC:12820]                                                                                                                                                                                                                | REXO4             | 0,60 |
| BCL2/adenovirus E1B 19kDa interacting protein 3                                                                                                                                                                                                                                    | BNIP3             | 0,60 |
| advillin                                                                                                                                                                                                                                                                           | AVIL              | 0,60 |
| zinc finger protein 763                                                                                                                                                                                                                                                            | ZNF763            | 0,60 |
| aspartic peptidase, retroviral-like 1; PCBP1 antisense RNA 1                                                                                                                                                                                                                       | ASPRV1; PCBP1-AS1 | 0,60 |
| Salzman2013 ANTISENSE, CDS, coding, INTERNAL, intronic, OVCODE, OVERLAPTX, OVEXON, UTR5 best transcript NM_005603                                                                                                                                                                  | ATP8B1            | 0,60 |
| activin A receptor type IC                                                                                                                                                                                                                                                         | ACVR1C            | 0,60 |
| tubulin tyrosine ligase-like family member 10                                                                                                                                                                                                                                      | TTLL10            | 0,60 |
| Transcript Identified by AceView, Entrez Gene ID(s) 23126                                                                                                                                                                                                                          | POGZ              | 0,60 |
| pleckstrin homology domain containing, family H (with MyTH4 domain) member 1                                                                                                                                                                                                       | PLEKHH1           | 0,60 |
| phosphatidylinositol-5-phosphate 4-kinase, type II, beta                                                                                                                                                                                                                           | PIP4K2B           | 0,60 |
| chromosome 15 open reading frame 61                                                                                                                                                                                                                                                | C15orf61          | 0,60 |
| pleiomorphic adenoma gene-like 2                                                                                                                                                                                                                                                   | PLAGL2            | 0,59 |

|                                                                                           |                |      |
|-------------------------------------------------------------------------------------------|----------------|------|
| laminin, alpha 5; microRNA 4758                                                           | LAMA5; MIR4758 | 0,59 |
| peroxisomal membrane protein 2                                                            | PXMP2          | 0,59 |
| FAST kinase domains 3                                                                     | FASTKD3        | 0,59 |
| neurobeachin                                                                              | NBEA           | 0,59 |
| progesterone receptor membrane component 1                                                | PGRMC1         | 0,59 |
| kinesin family member 4A                                                                  | KIF4A          | 0,59 |
| catechol-O-methyltransferase; microRNA 4761                                               | COMT; MIR4761  | 0,59 |
| YES proto-oncogene 1, Src family tyrosine kinase                                          | YES1           | 0,59 |
| nudix hydrolase 4                                                                         | NUDT4          | 0,59 |
| CXXC finger protein 5                                                                     | CXXC5          | 0,59 |
| zinc finger and BTB domain containing 34                                                  | ZBTB34         | 0,59 |
| ArfGAP with SH3 domain, ankyrin repeat and PH domain 3                                    | ASAP3          | 0,59 |
| nucleoporin 133kDa                                                                        | NUP133         | 0,59 |
| transmembrane protein 211                                                                 | TMEM211        | 0,59 |
| Transcript Identified by AceView, Entrez Gene ID(s) 4683                                  | NBN            | 0,59 |
| SKI proto-oncogene                                                                        | SKI            | 0,59 |
| STARD7 antisense RNA 1                                                                    | STARD7-AS1     | 0,59 |
| MRG/MORF4L binding protein                                                                | MRGBP          | 0,59 |
| BCL2-related ovarian killer                                                               | BOK            | 0,59 |
| ubiquitin specific peptidase 24                                                           | USP24          | 0,59 |
| adrenergic, beta, receptor kinase 2                                                       | ADRBK2         | 0,59 |
| transcription factor B1, mitochondrial                                                    | TFB1M          | 0,59 |
| plakophilin 4                                                                             | PKP4           | 0,59 |
| Transcript Identified by AceView, Entrez Gene ID(s) 153129                                | SLC38A9        | 0,59 |
| CD7 molecule                                                                              | CD7            | 0,59 |
| ring finger protein 175                                                                   | RNF175         | 0,59 |
| Memczak2013 ANTISENSE, coding, INTERNAL, intronic best transcript NM_001144382            | PLCL2          | 0,59 |
| succinate-CoA ligase, alpha subunit                                                       | SUCLG1         | 0,59 |
| protein kinase C and casein kinase substrate in neurons 3                                 | PACSIN3        | 0,59 |
| tectonic family member 3                                                                  | TCTN3          | 0,59 |
| zinc finger protein 780A                                                                  | ZNF780A        | 0,59 |
| ELL associated factor 2                                                                   | EAF2           | 0,59 |
| splicing factor proline/glutamine-rich                                                    | SFPQ           | 0,59 |
| SNF related kinase                                                                        | SNRK           | 0,59 |
| Salzman2013 ALT_ACCEPTOR, ALT_DONOR, coding, INTERNAL, intronic best transcript NM_080476 | PIGU           | 0,59 |
| POZ (BTB) and AT hook containing zinc finger 1                                            | PATZ1          | 0,59 |
| cysteine conjugate-beta lyase, cytoplasmic                                                | CCBL1          | 0,59 |
| Memczak2013 ANTISENSE, CDS, coding, INTERNAL best transcript NM_012235                    | SCAP           | 0,59 |

|                                                                                           |               |      |
|-------------------------------------------------------------------------------------------|---------------|------|
| component of oligomeric golgi complex 2                                                   | COG2          | 0,59 |
| endoplasmic reticulum protein 29                                                          | ERP29         | 0,59 |
| RAB20, member RAS oncogene family                                                         | RAB20         | 0,59 |
| syntaxin 17                                                                               | STX17         | 0,59 |
| fibrillarin                                                                               | FBL           | 0,59 |
| fibrillarin                                                                               | FBL           | 0,59 |
| tripartite motif containing 13; potassium channel regulator                               | TRIM13; KCNRG | 0,59 |
| nuclear transport factor 2-like export factor 2                                           | NXT2          | 0,59 |
| leucine rich repeat containing 2                                                          | LRRC2         | 0,59 |
| REX4 homolog, 3'-5' exonuclease [Source:HGNC Symbol;Acc:HGNC:12820]                       | REXO4         | 0,59 |
| transcription elongation factor A (SII)-like 1                                            | TCEAL1        | 0,59 |
| flotillin 1                                                                               | FLOT1         | 0,59 |
| Memczak2013 ANTISENSE, CDS, coding, INTERNAL best transcript NM_005207                    | CRKL          | 0,59 |
| coatomer protein complex subunit beta 1                                                   | COPB1         | 0,59 |
| phosphatase, orphan 2                                                                     | PHOSPHO2      | 0,59 |
| Williams-Beuren syndrome chromosome region 16                                             | WBSCR16       | 0,59 |
| immunoglobulin superfamily, member 8                                                      | IGSF8         | 0,59 |
| nuclear envelope integral membrane protein 2                                              | NEMP2         | 0,59 |
| transmembrane and ubiquitin-like domain containing 1                                      | TMUB1         | 0,59 |
| zinc finger protein 33A                                                                   | ZNF33A        | 0,59 |
| diacylglycerol kinase, delta 130kDa                                                       | DGKD          | 0,59 |
| WD repeat domain 6                                                                        | WDR6          | 0,59 |
| dCMP deaminase                                                                            | DCTD          | 0,59 |
| nucleotide binding protein-like                                                           | NUBPL         | 0,59 |
| chromosome 1 open reading frame 53                                                        | C1orf53       | 0,59 |
| adiponectin receptor 2                                                                    | ADIPOR2       | 0,59 |
| Transcript Identified by AceView, Entrez Gene ID(s) 51339                                 | DACT1         | 0,59 |
| zyg-11 family member B, cell cycle regulator                                              | ZYG11B        | 0,59 |
| reactive oxygen species modulator 1                                                       | ROMO1         | 0,59 |
| prolactin regulatory element binding                                                      | PREB          | 0,59 |
| single-pass membrane protein with coiled-coil domains 4                                   | SMCO4         | 0,59 |
| u3 small nucleolar ribonucleoprotein protein MPP10-like                                   | LOC643802     | 0,59 |
| piezo-type mechanosensitive ion channel component 2                                       | PIEZO2        | 0,59 |
| multiple EGF-like-domains 8                                                               | MEGF8         | 0,59 |
| PHD finger protein 14                                                                     | PHF14         | 0,59 |
| histone deacetylase 8                                                                     | HDAC8         | 0,59 |
| gamma-glutamylcyclotransferase                                                            | GGCT          | 0,59 |
| Jeck2013 ALT_ACCEPTOR, ALT_DONOR, coding, INTERNAL, intronic best transcript NM_001145418 | TTC28         | 0,59 |
| zinc finger protein 510                                                                   | ZNF510        | 0,59 |

|                                                                                                                                                                       |                          |      |
|-----------------------------------------------------------------------------------------------------------------------------------------------------------------------|--------------------------|------|
| MHC class I polypeptide-related sequence A                                                                                                                            | MICA                     | 0,59 |
| acyl-CoA synthetase family member 2                                                                                                                                   | ACSF2                    | 0,59 |
| FK506 binding protein 2                                                                                                                                               | FKBP2                    | 0,58 |
| nuclear casein kinase and cyclin-dependent kinase substrate 1                                                                                                         | NUCKS1                   | 0,58 |
| notchless homolog 1 (Drosophila)                                                                                                                                      | NLE1                     | 0,58 |
| HEAT repeat containing 5A                                                                                                                                             | HEATR5A                  | 0,58 |
| thymopoietin                                                                                                                                                          | TMPO                     | 0,58 |
| Transcript Identified by AceView, Entrez Gene ID(s) 84312                                                                                                             | BRMS1L                   | 0,58 |
| ethylmalonyl-CoA decarboxylase 1                                                                                                                                      | ECHDC1                   | 0,58 |
| acetyl-CoA acetyltransferase 1                                                                                                                                        | ACAT1                    | 0,58 |
| family with sequence similarity 63, member A                                                                                                                          | FAM63A                   | 0,58 |
| Transcript Identified by AceView, Entrez Gene ID(s) 7813                                                                                                              | EVI5                     | 0,58 |
| BORCS7-ASMT readthrough (NMD candidate)                                                                                                                               | BORCS7-ASMT              | 0,58 |
| syntaxin binding protein 4                                                                                                                                            | STXBP4                   | 0,58 |
| acetyl-CoA carboxylase alpha                                                                                                                                          | ACACA                    | 0,58 |
| armadillo repeat containing 2                                                                                                                                         | ARMC2                    | 0,58 |
| P450 (cytochrome) oxidoreductase; microRNA 4651                                                                                                                       | POR; MIR4651             | 0,58 |
| Transcript Identified by AceView, Entrez Gene ID(s) 7752                                                                                                              | ZNF200                   | 0,58 |
| solute carrier family 27 (fatty acid transporter), member 5                                                                                                           | SLC27A5                  | 0,58 |
| asialoglycoprotein receptor 2                                                                                                                                         | ASGR2                    | 0,58 |
| zinc finger and SCAN domain containing 2                                                                                                                              | ZSCAN2                   | 0,58 |
| uridine-cytidine kinase 1-like 1; microRNA 1914                                                                                                                       | UCKL1; MIR1914           | 0,58 |
| RAB38, member RAS oncogene family                                                                                                                                     | RAB38                    | 0,58 |
| mitochondrial ribosomal protein L1                                                                                                                                    | MRPL1                    | 0,58 |
| TSPY-like 2                                                                                                                                                           | TSPYL2                   | 0,58 |
| proline rich membrane anchor 1                                                                                                                                        | PRIMA1                   | 0,58 |
| ribosomal protein S7                                                                                                                                                  | RPS7                     | 0,58 |
| DDHD domain containing 2                                                                                                                                              | DDHD2                    | 0,58 |
| centlein, centrosomal protein                                                                                                                                         | CNTLN                    | 0,58 |
| lactation elevated 1                                                                                                                                                  | LACE1                    | 0,58 |
| zinc finger protein 684                                                                                                                                               | ZNF684                   | 0,58 |
| transmembrane protein 150C                                                                                                                                            | TMEM150C                 | 0,58 |
| choline/ethanolamine phosphotransferase 1                                                                                                                             | CEPT1                    | 0,58 |
| selenocysteine lyase                                                                                                                                                  | SCLY                     | 0,58 |
| N-methylpurine DNA glycosylase                                                                                                                                        | MPG                      | 0,58 |
| olfactory receptor, family 4, subfamily F, member 29;<br>olfactory receptor, family 4, subfamily F, member 3;<br>olfactory receptor, family 4, subfamily F, member 16 | OR4F29; OR4F3;<br>OR4F16 | 0,58 |
| olfactory receptor, family 4, subfamily F, member 16;<br>olfactory receptor, family 4, subfamily F, member 29                                                         | OR4F16; OR4F29           | 0,58 |

|                                                                                     |                 |      |
|-------------------------------------------------------------------------------------|-----------------|------|
| suppressor of cytokine signaling 1                                                  | SOCS1           | 0,58 |
| glioblastoma amplified sequence                                                     | GBAS            | 0,58 |
| Transcript Identified by AceView, Entrez Gene ID(s) 8997                            | KALRN           | 0,58 |
| lectin, mannose-binding, 1                                                          | LMAN1           | 0,58 |
| RAD54-like ( <i>S. cerevisiae</i> )                                                 | RAD54L          | 0,58 |
| Memczak2013 ANTISENSE, coding, INTERNAL, intronic<br>best transcript NM_205548      | FAM151B         | 0,58 |
| 2,4-dienoyl-CoA reductase 1, mitochondrial                                          | DECR1           | 0,58 |
| ring finger protein 126                                                             | RNF126          | 0,58 |
| family with sequence similarity 118, member A                                       | FAM118A         | 0,58 |
| glypican 3                                                                          | GPC3            | 0,58 |
| SH3 and PX domains 2A                                                               | SH3PXD2A        | 0,58 |
| zinc finger protein 580; zinc finger protein 581                                    | ZNF580; ZNF581  | 0,58 |
| pyruvate dehydrogenase kinase, isozyme 1                                            | PDK1            | 0,58 |
| secretion associated, Ras related GTPase 1A                                         | SAR1A           | 0,58 |
| tetraspanin 8                                                                       | TSPAN8          | 0,58 |
| carbamoyl-phosphate synthetase 2, aspartate<br>transcarbamylase, and dihydroorotase | CAD             | 0,58 |
| transforming, acidic coiled-coil containing protein 3                               | TACC3           | 0,58 |
| zinc finger protein 852                                                             | ZNF852          | 0,58 |
| kinesin family member 2C                                                            | KIF2C           | 0,58 |
| SLAIN motif family member 1                                                         | SLAIN1          | 0,58 |
| FXD domain containing ion transport regulator 2                                     | FXD2            | 0,58 |
| lysine (K)-specific methyltransferase 5C                                            | KMT5C           | 0,58 |
| histone deacetylase 5                                                               | HDAC5           | 0,58 |
| myosin, heavy chain 10, non-muscle                                                  | MYH10           | 0,58 |
| ChaC glutathione-specific gamma-<br>glutamylcyclotransferase 1                      | CHAC1           | 0,58 |
| ring finger protein 13                                                              | RNF13           | 0,58 |
| UDP glucuronosyltransferase 2 family, polypeptide B15                               | UGT2B15         | 0,58 |
| coiled-coil domain containing 142; mitochondrial<br>ribosomal protein L53           | CCDC142; MRPL53 | 0,58 |
| zinc finger protein 852                                                             | ZNF852          | 0,58 |
| solute carrier family 10, member 7                                                  | SLC10A7         | 0,58 |
| discs, large ( <i>Drosophila</i> ) homolog-associated protein 5                     | DLGAP5          | 0,58 |
| male germ cell-associated kinase                                                    | MAK             | 0,58 |
| ephrin-B2                                                                           | EFNB2           | 0,58 |
| transmembrane p24 trafficking protein 10                                            | TMED10          | 0,58 |
| acyl-CoA synthetase family member 3                                                 | ACSF3           | 0,58 |
| glutathione S-transferase mu 1                                                      | GSTM1           | 0,58 |
| glomulin, FKBP associated protein                                                   | GLMN            | 0,58 |
| mannose receptor, C type 2                                                          | MRC2            | 0,58 |
| transmembrane protein 121                                                           | TMEM121         | 0,58 |

|                                                                     |                |      |
|---------------------------------------------------------------------|----------------|------|
| Transcript Identified by AceView, Entrez Gene ID(s) 51663           | ZFR            | 0,58 |
| REV1, DNA directed polymerase                                       | REV1           | 0,58 |
| phosphoserine aminotransferase 1                                    | PSAT1          | 0,58 |
| BEN domain containing 3                                             | BEND3          | 0,58 |
| zinc finger protein 644                                             | ZNF644         | 0,58 |
| zinc finger protein 101                                             | ZNF101         | 0,58 |
| chromosome 3 open reading frame 35                                  | C3orf35        | 0,58 |
| RAN binding protein 1                                               | RANBP1         | 0,58 |
| serine/arginine-rich splicing factor 9                              | SRSF9          | 0,58 |
| translation machinery associated 16 homolog                         | TMA16          | 0,58 |
| mannose phosphate isomerase                                         | MPI            | 0,58 |
| Transcript Identified by AceView, Entrez Gene ID(s) 158219          | TTC39B         | 0,58 |
| ankyrin repeat domain 26                                            | ANKRD26        | 0,58 |
| zinc finger protein 780A                                            | ZNF780A        | 0,58 |
| ribosomal protein, large, P1                                        | RPLP1          | 0,58 |
| armadillo repeat containing 1                                       | ARMC1          | 0,58 |
| transcription factor-like 5 (basic helix-loop-helix)                | TCFL5          | 0,58 |
| solute carrier family 2 (facilitated glucose transporter), member 6 | SLC2A6         | 0,58 |
| GTP binding protein 3 (mitochondrial)                               | GTPBP3         | 0,58 |
| serine/arginine-rich splicing factor 3                              | SRSF3          | 0,58 |
| glutathione S-transferase mu 2 (muscle)                             | GSTM2          | 0,58 |
| Bet1 golgi vesicular membrane trafficking protein                   | BET1           | 0,58 |
| collagen, type XXVI, alpha 1                                        | COL26A1        | 0,58 |
| enhancer of rudimentary homolog (Drosophila)                        | ERH            | 0,58 |
| mitotic spindle organizing protein 2A; microRNA 4784                | MZT2A; MIR4784 | 0,58 |
| ST3 beta-galactoside alpha-2,3-sialyltransferase 1                  | ST3GAL1        | 0,58 |
| endoplasmic reticulum oxidoreductase alpha                          | ERO1A          | 0,58 |
| SET domain containing 3                                             | SETD3          | 0,58 |
| mitochondrial ribosomal protein L19                                 | MRPL19         | 0,58 |
| protein phosphatase 1, regulatory subunit 3C                        | PPP1R3C        | 0,58 |
| ST3 beta-galactoside alpha-2,3-sialyltransferase 5                  | ST3GAL5        | 0,58 |
| fibrillarin                                                         | FBL            | 0,58 |
| vacuolar protein sorting 13 homolog C (S. cerevisiae)               | VPS13C         | 0,58 |
| histone cluster 1, H2ah                                             | HIST1H2AH      | 0,58 |
| succinate dehydrogenase complex subunit A, flavoprotein (Fp)        | SDHA           | 0,58 |
| beta-site APP-cleaving enzyme 1                                     | BACE1          | 0,58 |
| chromobox homolog 2                                                 | CBX2           | 0,58 |
| potassium channel subfamily M regulatory beta subunit 3             | KCNMB3         | 0,58 |
| chromosome 19 open reading frame 52                                 | C19orf52       | 0,57 |
| long intergenic non-protein coding RNA 174                          | LINC00174      | 0,57 |

|                                                                                                                          |                            |      |
|--------------------------------------------------------------------------------------------------------------------------|----------------------------|------|
| NIMA-related kinase 8                                                                                                    | NEK8                       | 0,57 |
| abhydrolase domain containing 17A                                                                                        | ABHD17A                    | 0,57 |
| proteasome subunit beta 8                                                                                                | PSMB8                      | 0,57 |
| G protein-coupled receptor kinase 6                                                                                      | GRK6                       | 0,57 |
| integrator complex subunit 6                                                                                             | INTS6                      | 0,57 |
| mannosidase, alpha, class 2A, member 2                                                                                   | MAN2A2                     | 0,57 |
| glutaredoxin 2                                                                                                           | GLRX2                      | 0,57 |
| zinc finger protein 780B                                                                                                 | ZNF780B                    | 0,57 |
| TOPBP1-interacting checkpoint and replication regulator                                                                  | TICRR                      | 0,57 |
| osteosarcoma amplified 9, endoplasmic reticulum lectin                                                                   | OS9                        | 0,57 |
| ephrin-A4                                                                                                                | EFNA4                      | 0,57 |
| Jeck2013 ALT_ACCEPTOR, ALT_DONOR, coding, INTERNAL, intronic best transcript NM_000127; Transcript Identified by AceView | EXT1; hunera               | 0,57 |
| shroom family member 1                                                                                                   | SHROOM1                    | 0,57 |
| ADP-ribosylation factor like GTPase 6 interacting protein 6                                                              | ARL6IP6                    | 0,57 |
| ornithine decarboxylase antizyme 2                                                                                       | OAZ2                       | 0,57 |
| kelch repeat and BTB (POZ) domain containing 6                                                                           | KBTBD6                     | 0,57 |
| chromosome 2 open reading frame 82                                                                                       | C2orf82                    | 0,57 |
| polycystic kidney disease 1 (autosomal dominant); microRNA 6511b-2; microRNA 6511b-1                                     | PKD1; MIR6511B2; MIR6511B1 | 0,57 |
| HAUS augmin like complex subunit 7; three prime repair exonuclease 2                                                     | HAUS7; TREX2               | 0,57 |
| SDS3 homolog, SIN3A corepressor complex component                                                                        | SUDS3                      | 0,57 |
| small nuclear ribonucleoprotein, U11/U12 48KDa subunit                                                                   | SNRNP48                    | 0,57 |
| zinc finger, CCHC domain containing 24                                                                                   | ZCCHC24                    | 0,57 |
| UDP-glucose glycoprotein glucosyltransferase 1                                                                           | UGGT1                      | 0,57 |
| solute carrier family 29 (equilibrative nucleoside transporter), member 2                                                | SLC29A2                    | 0,57 |
| polymerase (DNA directed), epsilon 2, accessory subunit                                                                  | POLE2                      | 0,57 |
| transmembrane p24 trafficking protein 2                                                                                  | TMED2                      | 0,57 |
| serpin peptidase inhibitor, clade A (alpha-1 antiproteinase, antitrypsin), member 2 (gene/pseudogene)                    | SERPINA2                   | 0,57 |
| ribose 5-phosphate isomerase A                                                                                           | RPIA                       | 0,57 |
| RNA binding motif protein, X-linked; small nucleolar RNA, C/D box 61                                                     | RBMX; SNORD61              | 0,57 |
| cereblon                                                                                                                 | CRBN                       | 0,57 |
| KIAA1147                                                                                                                 | KIAA1147                   | 0,57 |
| histone deacetylase 3                                                                                                    | HDAC3                      | 0,57 |
| family with sequence similarity 186, member B                                                                            | FAM186B                    | 0,57 |



|                                                                                                          |                                       |      |
|----------------------------------------------------------------------------------------------------------|---------------------------------------|------|
| solute carrier family 25 (mitochondrial carrier; adenine nucleotide translocator), member 5              | SLC25A5                               | 0,57 |
| protein kinase, DNA-activated, catalytic polypeptide                                                     | PRKDC                                 | 0,57 |
| cleavage and polyadenylation specific factor 1; microRNA 939; microRNA 1234; microRNA 6849               | CPSF1; MIR939;<br>MIR1234;<br>MIR6849 | 0,57 |
| ribosomal protein L7a                                                                                    | RPL7A                                 | 0,57 |
| FK506 binding protein 10                                                                                 | FKBP10                                | 0,57 |
| inhibitor of growth family member 5                                                                      | ING5                                  | 0,57 |
| prostaglandin D2 receptor 2                                                                              | PTGDR2                                | 0,57 |
| spermatogenesis associated 24                                                                            | SPATA24                               | 0,57 |
| solute carrier family 35 (adenosine 3-phospho 5-phosphosulfate transporter), member B2; microRNA 4647    | SLC35B2;<br>MIR4647                   | 0,57 |
| DiGeorge syndrome critical region gene 2; DiGeorge syndrome critical region gene 11 (non-protein coding) | DGCR2; DGCR11                         | 0,57 |
| receptor-like tyrosine kinase                                                                            | RYK                                   | 0,57 |
| chromodomain helicase DNA binding protein 7                                                              | CHD7                                  | 0,57 |
| insulin like growth factor binding protein 3                                                             | IGFBP3                                | 0,57 |
| high mobility group 20A                                                                                  | HMG20A                                | 0,57 |
| potassium channel, voltage gated Shaw related subfamily C, member 1                                      | KCNC1                                 | 0,57 |
| potassium channel, voltage gated modifier subfamily G, member 3                                          | KCNG3                                 | 0,57 |
| ring finger protein 144A                                                                                 | RNF144A                               | 0,57 |
| ubiquitin-conjugating enzyme E2, J2                                                                      | UBE2J2                                | 0,57 |
| ubiquitin conjugating enzyme E2T                                                                         | UBE2T                                 | 0,57 |
| regulator of chromosome condensation 2                                                                   | RCC2                                  | 0,57 |
| priapism ring finger 2, E3 ubiquitin protein ligase                                                      | PJA2                                  | 0,57 |
| malate dehydrogenase 1                                                                                   | MDH1                                  | 0,57 |
| peroxisomal biogenesis factor 11 alpha                                                                   | PEX11A                                | 0,57 |
| zinc finger and SCAN domain containing 5A                                                                | ZSCAN5A                               | 0,57 |
| Fanconi anemia complementation group A                                                                   | FANCA                                 | 0,57 |
| HNF1 homeobox B                                                                                          | HNF1B                                 | 0,57 |
| solute carrier family 35 (UDP-galactose transporter), member A2                                          | SLC35A2                               | 0,57 |
| saccharopine dehydrogenase (putative)                                                                    | SCCPDH                                | 0,57 |
| small nuclear ribonucleoprotein, U5 40kDa subunit                                                        | SNRNP40                               | 0,57 |
| DEAD (Asp-Glu-Ala-Asp) box helicase 3, Y-linked                                                          | DDX3Y                                 | 0,57 |
| coatamer protein complex subunit beta 2 (beta prime)                                                     | COPB2                                 | 0,57 |
| histone cluster 2, H3d                                                                                   | HIST2H3D                              | 0,57 |
| ribonuclease H2, subunit C                                                                               | RNASEH2C                              | 0,57 |
| protein disulfide isomerase family A, member 6                                                           | PDIA6                                 | 0,57 |
| focadhesin                                                                                               | FOCAD                                 | 0,57 |

|                                                                                                                                                      |                               |      |
|------------------------------------------------------------------------------------------------------------------------------------------------------|-------------------------------|------|
| glutamic-pyruvate transaminase (alanine aminotransferase)                                                                                            | GPT                           | 0,57 |
| adenylate cyclase 5                                                                                                                                  | ADCY5                         | 0,57 |
| thyroid hormone receptor, alpha                                                                                                                      | THRA                          | 0,57 |
| mediator complex subunit 28                                                                                                                          | MED28                         | 0,57 |
| baculoviral IAP repeat containing 5                                                                                                                  | BIRC5                         | 0,57 |
| zinc finger protein 573                                                                                                                              | ZNF573                        | 0,57 |
| AT rich interactive domain 2 (ARID, RFX-like)                                                                                                        | ARID2                         | 0,57 |
| mediator complex subunit 13-like                                                                                                                     | MED13L                        | 0,57 |
| family with sequence similarity 168, member A                                                                                                        | FAM168A                       | 0,57 |
| centromere protein E                                                                                                                                 | CENPE                         | 0,57 |
| NDUFC2-KCTD14 readthrough; NADH dehydrogenase (ubiquinone) 1, subcomplex unknown, 2, 14.5kDa; potassium channel tetramerization domain containing 14 | NDUFC2-KCTD14; NDUFC2; KCTD14 | 0,57 |
| pyruvate dehydrogenase (lipoamide) alpha 1                                                                                                           | PDHA1                         | 0,57 |
| Sep (O-phosphoserine) tRNA:Sec (selenocysteine) tRNA synthase                                                                                        | SEPSECS                       | 0,57 |
| sulfatase modifying factor 1                                                                                                                         | SUMF1                         | 0,57 |
| pyruvate dehydrogenase kinase, isozyme 2                                                                                                             | PDK2                          | 0,57 |
| ribosomal protein S29; ribosomal protein L32 pseudogene 29                                                                                           | RPS29; RPL32P29               | 0,57 |
| polycystic kidney disease 2 (autosomal dominant)                                                                                                     | PKD2                          | 0,57 |
| nuclear receptor coactivator 2                                                                                                                       | NCOA2                         | 0,57 |
| THAP domain containing 11                                                                                                                            | THAP11                        | 0,57 |
| ArfGAP with GTPase domain, ankyrin repeat and PH domain 3                                                                                            | AGAP3                         | 0,57 |
| mitogen-activated protein kinase kinase kinase 4                                                                                                     | MAP3K4                        | 0,57 |
| tetraspanin 12                                                                                                                                       | TSPAN12                       | 0,56 |
| zinc finger protein 76                                                                                                                               | ZNF76                         | 0,56 |
| WD repeat domain 81                                                                                                                                  | WDR81                         | 0,56 |
| RAB42, member RAS oncogene family                                                                                                                    | RAB42                         | 0,56 |
| endonuclease G                                                                                                                                       | ENDOG                         | 0,56 |
| cell division cycle associated 3                                                                                                                     | CDCA3                         | 0,56 |
| long intergenic non-protein coding RNA 494                                                                                                           | LINC00494                     | 0,56 |
| olfactory receptor, family 2, subfamily J, member 2                                                                                                  | OR2J2                         | 0,56 |
| glucuronic acid epimerase                                                                                                                            | GLCE                          | 0,56 |
| Transcript Identified by AceView, Entrez Gene ID(s) 7184                                                                                             | HSP90B1                       | 0,56 |
| sema domain, transmembrane domain (TM), and cytoplasmic domain, (semaphorin) 6C                                                                      | SEMA6C                        | 0,56 |
| VCP-interacting membrane selenoprotein                                                                                                               | VIMP                          | 0,56 |
| Src homology 2 domain containing F                                                                                                                   | SHF                           | 0,56 |
| zinc finger protein 629                                                                                                                              | ZNF629                        | 0,56 |
| ubiquitin family domain containing 1                                                                                                                 | UBFD1                         | 0,56 |

|                                                                                            |              |      |
|--------------------------------------------------------------------------------------------|--------------|------|
| solute carrier family 26 (anion exchanger), member 2                                       | SLC26A2      | 0,56 |
| regulatory solute carrier protein, family 1, member 1;<br>DNA-damage inducible 1 homolog 2 | RSC1A1; DDI2 | 0,56 |
| ATPase, H <sup>+</sup> transporting, lysosomal accessory protein 1                         | ATP6AP1      | 0,56 |
| TIA1 cytotoxic granule-associated RNA binding protein                                      | TIA1         | 0,56 |
| SNF2 histone linker PHD RING helicase, E3 ubiquitin<br>protein ligase                      | SHPRH        | 0,56 |
| geminin, DNA replication inhibitor                                                         | GMNN         | 0,56 |
| H1 histone family, member X                                                                | H1FX         | 0,56 |
| aldehyde dehydrogenase 2 family (mitochondrial)                                            | ALDH2        | 0,56 |
| lamin B receptor                                                                           | LBR          | 0,56 |
| sex hormone-binding globulin                                                               | SHBG         | 0,56 |
| TMX2-CTNND1 readthrough (NMD candidate)                                                    | TMX2-CTNND1  | 0,56 |
| CDGSH iron sulfur domain 3                                                                 | CISD3        | 0,56 |
| ATP binding cassette subfamily B member 7                                                  | ABCB7        | 0,56 |
| Rho guanine nucleotide exchange factor 26                                                  | ARHGEF26     | 0,56 |
| zinc finger protein 780A                                                                   | ZNF780A      | 0,56 |
| kinesin family member 1C                                                                   | KIF1C        | 0,56 |
| solute carrier family 39 (zinc transporter), member 3                                      | SLC39A3      | 0,56 |
| suppressor of variegation 3-9 homolog 2 (Drosophila)                                       | SUV39H2      | 0,56 |
| acyl-CoA synthetase short-chain family member 3                                            | ACSS3        | 0,56 |
| rhomboid, veinlet-like 2 (Drosophila)                                                      | RHBDL2       | 0,56 |
| 5-methyltetrahydrofolate-homocysteine<br>methyltransferase reductase                       | MTRR         | 0,56 |
| chromosome 1 open reading frame 56                                                         | C1orf56      | 0,56 |
| paralemmin                                                                                 | PALM         | 0,56 |
| myocyte enhancer factor 2C                                                                 | MEF2C        | 0,56 |
| Transcript Identified by AceView, Entrez Gene ID(s) 23112                                  | TNRC6B       | 0,56 |
| hyaluronoglucosaminidase 3                                                                 | HYAL3        | 0,56 |
| WW and C2 domain containing 2                                                              | WWC2         | 0,56 |
| proline-rich transmembrane protein 1                                                       | PRRT1        | 0,56 |
| suppressor of cancer cell invasion; golgin A1                                              | SCAI; GOLGA1 | 0,56 |
| acylphosphatase 2, muscle type                                                             | ACYP2        | 0,56 |
| zinc finger protein 189                                                                    | ZNF189       | 0,56 |
| Memczak2013 ANTISENSE, CDS, coding, INTERNAL best<br>transcript NM_153341                  | RNF19B       | 0,56 |
| hook microtubule-tethering protein 2                                                       | HOOK2        | 0,56 |
| SR-related CTD-associated factor 11                                                        | SCAF11       | 0,56 |
| 6-phosphogluconolactonase                                                                  | PGLS         | 0,56 |
| family with sequence similarity 213, member A                                              | FAM213A      | 0,56 |
| transmembrane protein 117                                                                  | TMEM117      | 0,56 |
| LIM domain kinase 2                                                                        | LIMK2        | 0,56 |
| arylsulfatase family, member I                                                             | ARSI         | 0,56 |
| forkhead box K2                                                                            | FO XK2       | 0,56 |

|                                                                                                                                                   |                                                |      |
|---------------------------------------------------------------------------------------------------------------------------------------------------|------------------------------------------------|------|
| chromosome 7 open reading frame 31                                                                                                                | C7orf31                                        | 0,56 |
| fibrillarin                                                                                                                                       | FBL                                            | 0,56 |
| methyltransferase like 21B                                                                                                                        | METTTL21B                                      | 0,56 |
| zinc finger protein 780B                                                                                                                          | ZNF780B                                        | 0,56 |
| leukocyte receptor cluster (LRC) member 9                                                                                                         | LENG9                                          | 0,56 |
| mitogen-activated protein kinase kinase kinase 4                                                                                                  | MAP4K4                                         | 0,56 |
| pyrophosphatase (inorganic) 2                                                                                                                     | PPA2                                           | 0,56 |
| zinc finger protein 682                                                                                                                           | ZNF682                                         | 0,56 |
| period circadian clock 1; microRNA 6883                                                                                                           | PER1; MIR6883                                  | 0,56 |
| ubiquitin-like modifier activating enzyme 5                                                                                                       | UBA5                                           | 0,56 |
| Rab geranylgeranyltransferase, beta subunit; small nucleolar RNA, C/D box 45B; small nucleolar RNA, C/D box 45A; small nucleolar RNA, C/D box 45C | RABGGTB;<br>SNORD45B;<br>SNORD45A;<br>SNORD45C | 0,56 |
| Transcript Identified by AceView, Entrez Gene ID(s) 11059                                                                                         | WWP1                                           | 0,56 |
| zinc finger protein 772                                                                                                                           | ZNF772                                         | 0,56 |
| Memczak2013 ALT_ACCEPTOR, ALT_DONOR, coding, INTERNAL, intronic best transcript NM_003959                                                         | HIP1R                                          | 0,56 |
| KIAA2026                                                                                                                                          | KIAA2026                                       | 0,56 |
| ribosomal protein S9                                                                                                                              | RPS9                                           | 0,56 |
| cytochrome P450, family 3, subfamily A, polypeptide 7; CYP3A7-CYP3A51P readthrough                                                                | CYP3A7; CYP3A7-CYP3A51P                        | 0,56 |
| protein arginine methyltransferase 1                                                                                                              | PRMT1                                          | 0,56 |
| zinc finger protein 160                                                                                                                           | ZNF160                                         | 0,56 |
| ankyrin repeat domain 13A                                                                                                                         | ANKRD13A                                       | 0,55 |
| histone deacetylase 2                                                                                                                             | HDAC2                                          | 0,55 |
| neural precursor cell expressed, developmentally down-regulated 9                                                                                 | NEDD9                                          | 0,55 |
| cardiolipin synthase 1                                                                                                                            | CRLS1                                          | 0,55 |
| ZBED6 C-terminal like                                                                                                                             | ZBED6CL                                        | 0,55 |
| zinc finger protein 282                                                                                                                           | ZNF282                                         | 0,55 |
| leucine zipper transcription factor like 1                                                                                                        | LZTFL1                                         | 0,55 |
| muscleblind-like splicing regulator 3                                                                                                             | MBNL3                                          | 0,55 |
| uridine-cytidine kinase 1                                                                                                                         | UCK1                                           | 0,55 |
| growth factor receptor bound protein 7                                                                                                            | GRB7                                           | 0,55 |
| helicase, lymphoid-specific                                                                                                                       | HELLS                                          | 0,55 |
| mitochondrial ribosomal protein L13                                                                                                               | MRPL13                                         | 0,55 |
| xylosylprotein beta 1,4-galactosyltransferase, polypeptide 7                                                                                      | B4GALT7                                        | 0,55 |
| ribonucleoprotein, PTB-binding 1                                                                                                                  | RAVER1                                         | 0,55 |
| CREB/ATF bZIP transcription factor                                                                                                                | CREBZF                                         | 0,55 |
| LysM, putative peptidoglycan-binding, domain containing 3                                                                                         | LYSMD3                                         | 0,55 |
| dCTP pyrophosphatase 1                                                                                                                            | DCTPP1                                         | 0,55 |

|                                                                                                                                     |                              |      |
|-------------------------------------------------------------------------------------------------------------------------------------|------------------------------|------|
| potassium channel tetramerization domain containing 15                                                                              | KCTD15                       | 0,55 |
| heterogeneous nuclear ribonucleoprotein A2/B1                                                                                       | HNRNPA2B1                    | 0,55 |
| zinc finger protein 286A                                                                                                            | ZNF286A                      | 0,55 |
| neogenin 1                                                                                                                          | NEO1                         | 0,55 |
| APAF1 interacting protein                                                                                                           | APIP                         | 0,55 |
| methylmalonyl-CoA mutase                                                                                                            | MUT                          | 0,55 |
| LIM domain only 4                                                                                                                   | LMO4                         | 0,55 |
| zinc finger, FYVE domain containing 16                                                                                              | ZFYVE16                      | 0,55 |
| dual specificity phosphatase 16                                                                                                     | DUSP16                       | 0,55 |
| thioredoxin-like 4A                                                                                                                 | TXNL4A                       | 0,55 |
| histidine ammonia-lyase                                                                                                             | HAL                          | 0,55 |
| NIPA-like domain containing 1                                                                                                       | NIPAL1                       | 0,55 |
| hect domain and RLD 2 pseudogene 3                                                                                                  | HERC2P3                      | 0,55 |
| NIMA-related kinase 4                                                                                                               | NEK4                         | 0,55 |
| major histocompatibility complex, class I, B                                                                                        | HLA-B                        | 0,55 |
| zinc finger protein 233                                                                                                             | ZNF233                       | 0,55 |
| G protein-coupled receptor 75                                                                                                       | GPR75                        | 0,55 |
| LSM7 homolog, U6 small nuclear RNA and mRNA degradation associated                                                                  | LSM7                         | 0,55 |
| breast cancer 2, early onset                                                                                                        | BRCA2                        | 0,55 |
| chromosome 19 open reading frame 43                                                                                                 | C19orf43                     | 0,55 |
| aquaporin 11                                                                                                                        | AQP11                        | 0,55 |
| secretagogen, EF-hand calcium binding protein                                                                                       | SCGN                         | 0,55 |
| reversion-inducing-cysteine-rich protein with kazal motifs                                                                          | RECK                         | 0,55 |
| hypermethylated in cancer 2                                                                                                         | HIC2                         | 0,55 |
| surfeit 4                                                                                                                           | SURF4                        | 0,55 |
| fibronectin 1                                                                                                                       | FN1                          | 0,55 |
| ribosomal protein S3A; small nucleolar RNA, C/D box 73A                                                                             | RPS3A;<br>SNORD73A           | 0,55 |
| transferrin receptor 2                                                                                                              | TFR2                         | 0,55 |
| UDP glucuronosyltransferase 2 family, polypeptide A2;<br>UDP glucuronosyltransferase 2 family, polypeptide A1,<br>complex locus     | UGT2A2; UGT2A1               | 0,55 |
| metallo-beta-lactamase domain containing 2                                                                                          | MBLAC2                       | 0,55 |
| mitotic spindle organizing protein 1                                                                                                | MZT1                         | 0,55 |
| solute carrier family 39 (zinc transporter), member 10                                                                              | SLC39A10                     | 0,55 |
| Bet1 golgi vesicular membrane trafficking protein-like                                                                              | BET1L                        | 0,55 |
| pyruvate dehydrogenase complex, component X                                                                                         | PDHX                         | 0,55 |
| TBC1 domain family, member 12                                                                                                       | TBC1D12                      | 0,55 |
| dolichyl-phosphate mannosyltransferase polypeptide 3                                                                                | DPM3                         | 0,55 |
| uncharacterized protein LOC100652758 [Source:RefSeq<br>peptide;Acc:NP_001265011]; uncharacterized<br>LOC100652758; novel transcript | RP11-54C4.3;<br>LOC100652758 | 0,55 |

|                                                                                                                       |                  |      |
|-----------------------------------------------------------------------------------------------------------------------|------------------|------|
| peptide deformylase (mitochondrial); component of oligomeric golgi complex 8; transmembrane p24 trafficking protein 6 | PDF; COG8; TMED6 | 0,55 |
| nuclear factor I/X (CCAAT-binding transcription factor)                                                               | NFIX             | 0,55 |
| cyclin and CBS domain divalent metal cation transport mediator 2                                                      | CNNM2            | 0,55 |
| Memczak2013 ANTISENSE, CDS, coding, INTERNAL best transcript NM_004719                                                | SCAF11           | 0,55 |
| crystallin beta-gamma domain containing 3                                                                             | CRYBG3           | 0,55 |
| eukaryotic translation initiation factor 2A, 65kDa                                                                    | EIF2A            | 0,55 |
| ATP binding cassette subfamily D member 3                                                                             | ABCD3            | 0,55 |
| 3-hydroxy-3-methylglutaryl-CoA synthase 2 (mitochondrial)                                                             | HMGCS2           | 0,55 |
| fibrillarin                                                                                                           | FBL              | 0,55 |
| ARP3 actin-related protein 3 homolog C (yeast)                                                                        | ACTR3C           | 0,55 |
| zinc finger, DHHC-type containing 20                                                                                  | ZDHHC20          | 0,55 |
| signal peptidase complex subunit 2                                                                                    | SPCS2            | 0,55 |
| t-complex 10-like 2                                                                                                   | TCP10L2          | 0,55 |
| palmitoyl-protein thioesterase 1                                                                                      | PPT1             | 0,55 |
| prolyl 3-hydroxylase 3                                                                                                | P3H3             | 0,55 |
| KIAA1109                                                                                                              | KIAA1109         | 0,55 |
| GLTSCR1-like                                                                                                          | GLTSCR1L         | 0,55 |
| COBW domain containing 2                                                                                              | CBWD2            | 0,55 |
| caspase activity and apoptosis inhibitor 1                                                                            | CAAP1            | 0,55 |
| programmed cell death 7                                                                                               | PDCD7            | 0,55 |
| osteopetrosis associated transmembrane protein 1                                                                      | OSTM1            | 0,55 |
| myomesin 1                                                                                                            | MYOM1            | 0,55 |
| formimidoyltransferase cyclodeaminase                                                                                 | FTCD             | 0,55 |
| ATP/GTP binding protein-like 3                                                                                        | AGBL3            | 0,55 |
| small nuclear ribonucleoprotein polypeptide A                                                                         | SNRPA1           | 0,55 |
| AT hook containing transcription factor 1                                                                             | AHCTF1           | 0,55 |
| ribosome binding protein 1                                                                                            | RRBP1            | 0,55 |
| ubiquitin specific peptidase 37                                                                                       | USP37            | 0,55 |
| patched domain containing 4                                                                                           | PTCHD4           | 0,55 |
| family with sequence similarity 185, member A                                                                         | FAM185A          | 0,55 |
| WD repeat containing, antisense to TP73                                                                               | WRAP73           | 0,55 |
| histone cluster 2, H2ac                                                                                               | HIST2H2AC        | 0,54 |
| zinc finger, BED-type containing 8                                                                                    | ZBED8            | 0,54 |
| lamin B2; microRNA 7108                                                                                               | LMNB2; MIR7108   | 0,54 |
| neuroepithelial cell transforming 1                                                                                   | NET1             | 0,54 |
| zinc finger, BED-type containing 3                                                                                    | ZBED3            | 0,54 |
| heat shock protein 90kDa beta (Grp94), member 1; microRNA 3652                                                        | HSP90B1; MIR3652 | 0,54 |
| solute carrier family 33 (acetyl-CoA transporter), member 1                                                           | SLC33A1          | 0,54 |

|                                                                                            |                          |      |
|--------------------------------------------------------------------------------------------|--------------------------|------|
| allograft inflammatory factor 1-like                                                       | AIF1L                    | 0,54 |
| NUS1 dehydrololichyl diphosphate synthase subunit                                          | NUS1                     | 0,54 |
| transmembrane protein 245                                                                  | TMEM245                  | 0,54 |
| small nucleolar RNA, C/D box 102; small nucleolar RNA, H/ACA box 27; ribosomal protein L21 | SNORD102; SNORA27; RPL21 | 0,54 |
| component of oligomeric golgi complex 3                                                    | COG3                     | 0,54 |
| histone cluster 1, H2bm                                                                    | HIST1H2BM                | 0,54 |
| required for meiotic nuclear division 5 homolog A                                          | RMND5A                   | 0,54 |
| pyridoxal (pyridoxine, vitamin B6) kinase                                                  | PDXK                     | 0,54 |
| surfeit 4                                                                                  | SURF4                    | 0,54 |
| hydroxylysine kinase                                                                       | HYKK                     | 0,54 |
| additional sex combs like transcriptional regulator 1                                      | ASXL1                    | 0,54 |
| HAUS augmin like complex subunit 1                                                         | HAUS1                    | 0,54 |
| staphylococcal nuclease and tudor domain containing 1; SND1 intronic transcript 1          | SND1; SND1-IT1           | 0,54 |
| surfeit 4                                                                                  | SURF4                    | 0,54 |
| solute carrier family 2 (facilitated glucose transporter), member 4                        | SLC2A4                   | 0,54 |
| fibrillarin                                                                                | FBL                      | 0,54 |
| round spermatid basic protein 1                                                            | RSBN1                    | 0,54 |
| janus kinase and microtubule interacting protein 2                                         | JAKMIP2                  | 0,54 |
| tripartite motif containing 4                                                              | TRIM4                    | 0,54 |
| major histocompatibility complex, class I, C                                               | HLA-C                    | 0,54 |
| glutathione S-transferase alpha 2                                                          | GSTA2                    | 0,54 |
| FERM, ARH/RhoGEF and pleckstrin domain protein 2                                           | FARP2                    | 0,54 |
| TAF11 RNA polymerase II, TATA box binding protein (TBP)-associated factor, 28kDa           | TAF11                    | 0,54 |
| fibroblast growth factor receptor 1                                                        | FGFR1                    | 0,54 |
| KIAA0141                                                                                   | KIAA0141                 | 0,54 |
| ras homolog family member J                                                                | RHOJ                     | 0,54 |
| cysteine rich with EGF-like domains 2                                                      | CRELD2                   | 0,54 |
| interleukin 1 receptor associated kinase 1 binding protein 1                               | IRAK1BP1                 | 0,54 |
| HECT and RLD domain containing E3 ubiquitin protein ligase 2                               | HERC2                    | 0,54 |
| EPM2A (laforin) interacting protein 1                                                      | EPM2AIP1                 | 0,54 |
| cilia and flagella associated protein 20                                                   | CFAP20                   | 0,54 |
| homeobox containing 1                                                                      | HMBOX1                   | 0,54 |
| inversin                                                                                   | INVS                     | 0,54 |
| zinc finger protein 248                                                                    | ZNF248                   | 0,54 |
| enhancer of zeste 2 polycomb repressive complex 2 subunit                                  | EZH2                     | 0,54 |
| zinc finger protein 429                                                                    | ZNF429                   | 0,54 |
| spermatogenesis associated 25                                                              | SPATA25                  | 0,54 |
| C-terminal binding protein 1                                                               | CTBP1                    | 0,54 |

|                                                                                                             |                                  |      |
|-------------------------------------------------------------------------------------------------------------|----------------------------------|------|
| heterogeneous nuclear ribonucleoprotein L-like                                                              | HNRNPLL                          | 0,54 |
| leucine rich repeat containing 61                                                                           | LRRC61                           | 0,54 |
| v-akt murine thymoma viral oncogene homolog 2                                                               | AKT2                             | 0,54 |
| histone cluster 1, H2bi                                                                                     | HIST1H2BI                        | 0,54 |
| acetyl-CoA acyltransferase 2                                                                                | ACAA2                            | 0,54 |
| ectonucleoside triphosphate diphosphohydrolase 6 (putative)                                                 | ENTPD6                           | 0,54 |
| ST6 (alpha-N-acetyl-neuraminy-2,3-beta-galactosyl-1,3)-N-acetylglactosaminide alpha-2,6-sialyltransferase 6 | ST6GALNAC6                       | 0,54 |
| cadherin, EGF LAG seven-pass G-type receptor 2                                                              | CELSR2                           | 0,54 |
| multiple endocrine neoplasia I                                                                              | MEN1                             | 0,54 |
| translocase of outer mitochondrial membrane 20 homolog (yeast)                                              | TOMM20                           | 0,54 |
| Memczak2013 ANTISENSE, CDS, coding, INTERNAL, UTR3 best transcript NM_001752                                | CAT                              | 0,54 |
| small nuclear ribonucleoprotein polypeptide F                                                               | SNRPF                            | 0,54 |
| pleckstrin homology domain containing, family A (phosphoinositide binding specific) member 8                | PLEKHA8                          | 0,54 |
| deoxyuridine triphosphatase                                                                                 | DUT                              | 0,54 |
| DnaJ (Hsp40) homolog, subfamily A, member 3                                                                 | DNAJA3                           | 0,54 |
| HNF1 homeobox A                                                                                             | HNF1A                            | 0,54 |
| uncharacterized LOC730183; Transcript Identified by AceView; novel transcript, antisense to SRCAP           | LOC730183; RP11-146F11.1; hitema | 0,54 |
| Rap guanine nucleotide exchange factor 6                                                                    | RAPGEF6                          | 0,54 |
| neuroligin 4, X-linked                                                                                      | NLGN4X                           | 0,54 |
| GID complex subunit 8                                                                                       | GID8                             | 0,54 |
| serpin peptidase inhibitor, clade A (alpha-1 antiproteinase, antitrypsin), member 9                         | SERPINA9                         | 0,54 |
| 1-acylglycerol-3-phosphate O-acyltransferase 2                                                              | AGPAT2                           | 0,54 |
| leucine zipper and CTNNBIP1 domain containing                                                               | LZIC                             | 0,54 |
| trafficking protein particle complex 5                                                                      | TRAPPC5                          | 0,54 |
| coiled-coil-helix-coiled-coil-helix domain containing 1                                                     | CHCHD1                           | 0,54 |
| sirtuin 5                                                                                                   | SIRT5                            | 0,54 |
| enolase 3 (beta, muscle)                                                                                    | ENO3                             | 0,54 |
| TLC domain containing 1                                                                                     | TLCD1                            | 0,54 |
| Transcript Identified by AceView, Entrez Gene ID(s) 3069                                                    | HDLBP                            | 0,54 |
| BCL2/adenovirus E1B 19kDa interacting protein 3-like                                                        | BNIP3L                           | 0,54 |
| solute carrier family 25 (pyrimidine nucleotide carrier), member 36                                         | SLC25A36                         | 0,54 |
| farnesyltransferase, CAAX box, beta                                                                         | FNTB                             | 0,54 |
| DEP domain containing 1                                                                                     | DEPDC1                           | 0,54 |
| mortality factor 4 like 2                                                                                   | MORF4L2                          | 0,54 |
| regulation of nuclear pre-mRNA domain containing 1A                                                         | RPRD1A                           | 0,54 |



|                                                                                                                   |                       |      |
|-------------------------------------------------------------------------------------------------------------------|-----------------------|------|
| mitogen-activated protein kinase kinase kinase 11                                                                 | MAP3K11               | 0,54 |
| nuclear factor, interleukin 3 regulated                                                                           | NFIL3                 | 0,54 |
| protein tyrosine phosphatase, receptor type, N polypeptide 2                                                      | PTPRN2                | 0,54 |
| cancer susceptibility candidate 4                                                                                 | CASC4                 | 0,54 |
| signal transducer and activator of transcription 2                                                                | STAT2                 | 0,54 |
| major facilitator superfamily domain containing 8                                                                 | MFSD8                 | 0,53 |
| zinc finger with KRAB and SCAN domains 1                                                                          | ZKSCAN1               | 0,53 |
| utrophin                                                                                                          | UTRN                  | 0,53 |
| von Willebrand factor A domain containing 8; microRNA 5006                                                        | VWA8; MIR5006         | 0,53 |
| serum/glucocorticoid regulated kinase 2                                                                           | SGK2                  | 0,53 |
| motor neuron and pancreas homeobox 1                                                                              | MNX1                  | 0,53 |
| zinc finger protein 503                                                                                           | ZNF503                | 0,53 |
| eukaryotic translation initiation factor 2-alpha kinase 3                                                         | EIF2AK3               | 0,53 |
| acyl-CoA binding domain containing 4                                                                              | ACBD4                 | 0,53 |
| minichromosome maintenance complex component 5                                                                    | MCM5                  | 0,53 |
| aldehyde dehydrogenase 5 family, member A1                                                                        | ALDH5A1               | 0,53 |
| transmembrane protein 223                                                                                         | TMEM223               | 0,53 |
| major facilitator superfamily domain containing 14A                                                               | MFSD14A               | 0,53 |
| breast cancer metastasis-suppressor 1-like                                                                        | BRMS1L                | 0,53 |
| carcinoembryonic antigen-related cell adhesion molecule 1 (biliary glycoprotein)                                  | CEACAM1               | 0,53 |
| ubiquitin specific peptidase 30                                                                                   | USP30                 | 0,53 |
| HECT, UBA and WWE domain containing 1, E3 ubiquitin protein ligase                                                | HUWE1                 | 0,53 |
| BLOC1S5-TXNDC5 readthrough (NMD candidate)                                                                        | BLOC1S5-TXNDC5        | 0,53 |
| RAP1 GTPase activating protein                                                                                    | RAP1GAP               | 0,53 |
| poly(A) binding protein interacting protein 2 [Source:EntrezGene;Acc:51247]; novel transcript, antisense to PAIP2 | PAIP2; CTB-43P18.1    | 0,53 |
| copper chaperone for superoxide dismutase                                                                         | CCS                   | 0,53 |
| centrosomal protein 350kDa                                                                                        | CEP350                | 0,53 |
| COBW domain containing 1                                                                                          | CBWD1                 | 0,53 |
| zinc finger protein 780A                                                                                          | ZNF780A               | 0,53 |
| long intergenic non-protein coding RNA 493                                                                        | LINC00493             | 0,53 |
| POU class 2 associating factor 1                                                                                  | POU2AF1               | 0,53 |
| KAT8 regulatory NSL complex subunit 1 like                                                                        | KANSL1L               | 0,53 |
| beta-1,4-N-acetyl-galactosaminyl transferase 3                                                                    | B4GALNT3              | 0,53 |
| translocase of outer mitochondrial membrane 7 homolog (yeast)                                                     | TOMM7                 | 0,53 |
| selenophosphate synthetase 2                                                                                      | SEPHS2                | 0,53 |
| ribosomal protein S14                                                                                             | RPS14                 | 0,53 |
| ankyrin repeat domain 57 pseudogene                                                                               | LOC389834; AL354822.1 | 0,53 |

|                                                                                            |                |      |
|--------------------------------------------------------------------------------------------|----------------|------|
| arylsulfatase family, member K                                                             | ARSK           | 0,53 |
| AT rich interactive domain 4A (RBP1-like)                                                  | ARID4A         | 0,53 |
| ALG5, dolichyl-phosphate beta-glucosyltransferase                                          | ALG5           | 0,53 |
| sterol regulatory element binding transcription factor 1                                   | SREBF1         | 0,53 |
| chromosome 17 open reading frame 100                                                       | C17orf100      | 0,53 |
| oncostatin M receptor                                                                      | OSMR           | 0,53 |
| zinc finger protein 511                                                                    | ZNF511         | 0,53 |
| gamma-secretase activating protein                                                         | GSAP           | 0,53 |
| transmembrane protein 214                                                                  | TMEM214        | 0,53 |
| ribosomal protein L10a                                                                     | RPL10A         | 0,53 |
| ribosomal protein L21                                                                      | RPL21          | 0,53 |
| BRI3 binding protein                                                                       | BRI3BP         | 0,53 |
| coiled-coil domain containing 117                                                          | CCDC117        | 0,53 |
| low density lipoprotein receptor class A domain<br>containing 4                            | LDLRAD4        | 0,53 |
| RNA binding motif protein 8A                                                               | RBM8A          | 0,53 |
| protein phosphatase, Mg2+/Mn2+ dependent, 1K                                               | PPM1K          | 0,53 |
| polymerase (RNA) III (DNA directed) polypeptide D, 44kDa                                   | POLR3D         | 0,53 |
| nuclear factor of activated T-cells 5, tonicity-responsive                                 | NFAT5          | 0,53 |
| aldehyde dehydrogenase 1 family, member A1                                                 | ALDH1A1        | 0,53 |
| Yip1 domain family member 2                                                                | YIPF2          | 0,53 |
| ATP binding cassette subfamily G member 5                                                  | ABCG5          | 0,53 |
| myeloid differentiation primary response 88                                                | MYD88          | 0,53 |
| cancer susceptibility candidate 10                                                         | CASC10         | 0,53 |
| inhibitor of growth family member 3                                                        | ING3           | 0,53 |
| arginyltransferase 1                                                                       | ATE1           | 0,53 |
| chromodomain helicase DNA binding protein 1-like                                           | CHD1L          | 0,53 |
| TYRO3 protein tyrosine kinase                                                              | TYRO3          | 0,53 |
| histone cluster 2, H2bf                                                                    | HIST2H2BF      | 0,53 |
| ATP synthase, H+ transporting, mitochondrial Fo complex<br>subunit C3 (subunit 9)          | ATP5G3         | 0,53 |
| programmed cell death 4 (neoplastic transformation<br>inhibitor); microRNA 4680            | PDCD4; MIR4680 | 0,53 |
| solute carrier family 51, alpha subunit                                                    | SLC51A         | 0,53 |
| Memczak2013 ANTISENSE, CDS, coding, INTERNAL best<br>transcript NM_014709                  | USP34          | 0,53 |
| mitochondrial transcription termination factor 2                                           | MTERF2         | 0,53 |
| histone cluster 1, H3c                                                                     | HIST1H3C       | 0,53 |
| SRY box 8                                                                                  | SOX8           | 0,53 |
| COBW domain containing 3                                                                   | CBWD3          | 0,53 |
| stromal cell derived factor 4                                                              | SDF4           | 0,53 |
| Zhang2013 ALT_ACCEPTOR, ALT_DONOR, coding,<br>INTERNAL, intronic best transcript NM_173595 | ANKRD52        | 0,53 |
| casein kinase 1, gamma 2                                                                   | CSNK1G2        | 0,53 |

|                                                                                             |                     |      |
|---------------------------------------------------------------------------------------------|---------------------|------|
| chromosome 17 open reading frame 75                                                         | C17orf75            | 0,53 |
| chromobox homolog 3                                                                         | CBX3                | 0,53 |
| WAP, follistatin/kazal, immunoglobulin, kunitz and netrin domain containing 1               | WFIKKN1             | 0,53 |
| SCAN domain containing 1                                                                    | SCAND1              | 0,53 |
| DEP domain containing MTOR-interacting protein family with sequence similarity 8, member A1 | DEPTOR              | 0,53 |
| FAM8A1                                                                                      | FAM8A1              | 0,53 |
| glucosidase, alpha; neutral AB                                                              | GANAB               | 0,53 |
| chromosome 6 open reading frame 106                                                         | C6orf106            | 0,53 |
| MRS2 magnesium transporter                                                                  | MRS2                | 0,53 |
| Memczak2013 ALT_ACCEPTOR, ALT_DONOR, coding, INTERNAL, intronic best transcript NM_021156   | TMX4                | 0,53 |
| lysine (K)-specific demethylase 6A                                                          | KDM6A               | 0,53 |
| transmembrane protein 57                                                                    | TMEM57              | 0,53 |
| golgin, RAB6-interacting                                                                    | GORAB               | 0,53 |
| suppressor of cytokine signaling 5                                                          | SOCS5               | 0,53 |
| ATP synthase mitochondrial F1 complex assembly factor 1                                     | ATPAF1              | 0,53 |
| poliovirus receptor-related 2 (herpesvirus entry mediator B)                                | PVRL2               | 0,53 |
| CCAAT/enhancer binding protein (C/EBP), alpha                                               | CEBPA               | 0,52 |
| Yae1 domain containing 1                                                                    | YAE1D1              | 0,52 |
| tetratricopeptide repeat domain 13                                                          | TTC13               | 0,52 |
| intraflagellar transport 172                                                                | IFT172              | 0,52 |
| XRCC6 binding protein 1                                                                     | XRCC6BP1            | 0,52 |
| SMAD family member 6                                                                        | SMAD6               | 0,52 |
| unc-119 lipid binding chaperone B; microRNA 4700                                            | UNC119B;<br>MIR4700 | 0,52 |
| Transcript Identified by AceView, Entrez Gene ID(s) 63898                                   | SH2D4A              | 0,52 |
| sorbitol dehydrogenase                                                                      | SORD                | 0,52 |
| sirtuin 3                                                                                   | SIRT3               | 0,52 |
| DNA fragmentation factor, 40kDa, beta polypeptide (caspase-activated DNase)                 | DFFB                | 0,52 |
| insulin-like growth factor 1 receptor                                                       | IGF1R               | 0,52 |
| chromosome 8 open reading frame 49                                                          | C8orf49             | 0,52 |
| NAD synthetase 1                                                                            | NADSYN1             | 0,52 |
| TruB pseudouridine (psi) synthase family member 1                                           | TRUB1               | 0,52 |
| Sec23 homolog A, COPII coat complex component                                               | SEC23A              | 0,52 |
| mitogen-activated protein kinase kinase kinase 13                                           | MAP3K13             | 0,52 |
| ephrin-A2                                                                                   | EFNA2               | 0,52 |
| jade family PHD finger 3                                                                    | JADE3               | 0,52 |
| serine palmitoyltransferase, small subunit A                                                | SPTSSA              | 0,52 |
| transmembrane protein 18                                                                    | TMEM18              | 0,52 |
| glyoxylate reductase/hydroxypyruvate reductase                                              | GRHPR               | 0,52 |

|                                                                                                                                                                 |                               |      |
|-----------------------------------------------------------------------------------------------------------------------------------------------------------------|-------------------------------|------|
| dedicator of cytokinesis 6                                                                                                                                      | DOCK6                         | 0,52 |
| tetraspanin 3                                                                                                                                                   | TSPAN3                        | 0,52 |
| ornithine carbamoyltransferase                                                                                                                                  | OTC                           | 0,52 |
| alpha thalassemia/mental retardation syndrome X-linked                                                                                                          | ATRX                          | 0,52 |
| synovial sarcoma, X breakpoint 2 interacting protein                                                                                                            | SSX2IP                        | 0,52 |
| ribosomal protein S5                                                                                                                                            | RPS5                          | 0,52 |
| small integral membrane protein 8                                                                                                                               | SMIM8                         | 0,52 |
| bromodomain containing 3                                                                                                                                        | BRD3                          | 0,52 |
| tripartite motif containing 10                                                                                                                                  | TRIM10                        | 0,52 |
| acyl-CoA synthetase medium-chain family member 5                                                                                                                | ACSM5                         | 0,52 |
| heparan sulfate 2-O-sulfotransferase 1                                                                                                                          | HS2ST1                        | 0,52 |
| NIMA-related kinase 3                                                                                                                                           | NEK3                          | 0,52 |
| ZFP69 zinc finger protein B                                                                                                                                     | ZFP69B                        | 0,52 |
| small nuclear ribonucleoprotein polypeptide N; SNRPN upstream reading frame; small nucleolar RNA, C/D box 107; Prader Willi/Angelman region RNA, SNRPN neighbor | SNRPN; SNURF; SNORD107; PWARN | 0,52 |
| COX18 cytochrome c oxidase assembly factor                                                                                                                      | COX18                         | 0,52 |
| kinesin family member 13B                                                                                                                                       | KIF13B                        | 0,52 |
| beta-transducin repeat containing E3 ubiquitin protein ligase                                                                                                   | BTRC                          | 0,52 |
| THO complex 1                                                                                                                                                   | THOC1                         | 0,52 |
| ATPase, Na <sup>+</sup> /K <sup>+</sup> transporting, beta 3 polypeptide                                                                                        | ATP1B3                        | 0,52 |
| dimethylarginine dimethylaminohydrolase 2                                                                                                                       | DDAH2                         | 0,52 |
| colony stimulating factor 3 receptor                                                                                                                            | CSF3R                         | 0,52 |
| arginase 1                                                                                                                                                      | ARG1                          | 0,52 |
| transmembrane p24 trafficking protein 5                                                                                                                         | TMED5                         | 0,52 |
| Memczak2013 ANTISENSE, CDS, coding, INTERNAL best transcript NM_001206844                                                                                       | TGOLN2                        | 0,52 |
| A kinase (PRKA) anchor protein 9                                                                                                                                | AKAP9                         | 0,52 |
| protein tyrosine phosphatase type IVA, member 3                                                                                                                 | PTP4A3                        | 0,52 |
| MAGE family member H1                                                                                                                                           | MAGEH1                        | 0,52 |
| cyclin Y                                                                                                                                                        | CCNY                          | 0,52 |
| adenomatosis polyposis coli down-regulated 1                                                                                                                    | APCDD1                        | 0,52 |
| calpain 7                                                                                                                                                       | CAPN7                         | 0,52 |
| adaptor protein, phosphotyrosine interaction, PH domain and leucine zipper containing 1                                                                         | APPL1                         | 0,52 |
| HECT and RLD domain containing E3 ubiquitin protein ligase family member 1                                                                                      | HERC1                         | 0,52 |
| CD83 molecule                                                                                                                                                   | CD83                          | 0,52 |
| septin 8                                                                                                                                                        | sept-08                       | 0,52 |
| solute carrier family 23 (ascorbic acid transporter), member 1                                                                                                  | SLC23A1                       | 0,52 |
| metastasis associated 1 family member 3                                                                                                                         | MTA3                          | 0,52 |

|                                                                                                                                                                                                                                                                                                                                                                                                                                                                                                                                                                                                                                                                                                                                                                               |              |      |
|-------------------------------------------------------------------------------------------------------------------------------------------------------------------------------------------------------------------------------------------------------------------------------------------------------------------------------------------------------------------------------------------------------------------------------------------------------------------------------------------------------------------------------------------------------------------------------------------------------------------------------------------------------------------------------------------------------------------------------------------------------------------------------|--------------|------|
| zinc finger, matrin-type 3                                                                                                                                                                                                                                                                                                                                                                                                                                                                                                                                                                                                                                                                                                                                                    | ZMAT3        | 0,52 |
| insulin receptor                                                                                                                                                                                                                                                                                                                                                                                                                                                                                                                                                                                                                                                                                                                                                              | INSR         | 0,52 |
| MYC induced nuclear antigen                                                                                                                                                                                                                                                                                                                                                                                                                                                                                                                                                                                                                                                                                                                                                   | MINA         | 0,52 |
| chromosome 8 open reading frame 4                                                                                                                                                                                                                                                                                                                                                                                                                                                                                                                                                                                                                                                                                                                                             | C8orf4       | 0,52 |
| THAP domain containing, apoptosis associated protein 2                                                                                                                                                                                                                                                                                                                                                                                                                                                                                                                                                                                                                                                                                                                        | THAP2        | 0,52 |
| SPC25, NDC80 kinetochore complex component                                                                                                                                                                                                                                                                                                                                                                                                                                                                                                                                                                                                                                                                                                                                    | SPC25        | 0,52 |
| Homo sapiens ribosomal protein L21, mRNA (cDNA clone MGC:2150 IMAGE:3543702), complete cds.; Homo sapiens ribosomal protein L21, mRNA (cDNA clone MGC:4136 IMAGE:2964441), complete cds.; Homo sapiens ribosomal protein L21, mRNA (cDNA clone MGC:71252 IMAGE:6084268), complete cds.; Homo sapiens ribosomal protein L21, mRNA (cDNA clone MGC:88165 IMAGE:4281405), complete cds.; Homo sapiens ribosomal protein L21, mRNA (cDNA clone MGC:88326 IMAGE:4248655), complete cds.; Homo sapiens ribosomal protein L21, mRNA (cDNA clone MGC:88334 IMAGE:3931616), complete cds.; Homo sapiens ribosomal protein L21, mRNA (cDNA clone MGC:88581 IMAGE:4901492), complete cds.; Homo sapiens ribosomal protein L21, mRNA (cDNA clone MGC:104275 IMAGE:6724053), complete cds. | RPL21        | 0,52 |
| complement component 8, beta polypeptide                                                                                                                                                                                                                                                                                                                                                                                                                                                                                                                                                                                                                                                                                                                                      | C8B          | 0,52 |
| malectin                                                                                                                                                                                                                                                                                                                                                                                                                                                                                                                                                                                                                                                                                                                                                                      | MLEC         | 0,52 |
| coiled-coil domain containing 65                                                                                                                                                                                                                                                                                                                                                                                                                                                                                                                                                                                                                                                                                                                                              | CCDC65       | 0,52 |
| suppressor of IKBKE 1                                                                                                                                                                                                                                                                                                                                                                                                                                                                                                                                                                                                                                                                                                                                                         | SIKE1        | 0,52 |
| interferon-induced protein 35                                                                                                                                                                                                                                                                                                                                                                                                                                                                                                                                                                                                                                                                                                                                                 | IFI35        | 0,52 |
| family with sequence similarity 126, member A                                                                                                                                                                                                                                                                                                                                                                                                                                                                                                                                                                                                                                                                                                                                 | FAM126A      | 0,52 |
| alcohol dehydrogenase 4 (class II), pi polypeptide                                                                                                                                                                                                                                                                                                                                                                                                                                                                                                                                                                                                                                                                                                                            | ADH4         | 0,52 |
| phosphoinositide-3-kinase, regulatory subunit 3 (gamma)                                                                                                                                                                                                                                                                                                                                                                                                                                                                                                                                                                                                                                                                                                                       | PIK3R3       | 0,52 |
| hypoxia up-regulated 1                                                                                                                                                                                                                                                                                                                                                                                                                                                                                                                                                                                                                                                                                                                                                        | HYOU1        | 0,51 |
| histone deacetylase 4                                                                                                                                                                                                                                                                                                                                                                                                                                                                                                                                                                                                                                                                                                                                                         | HDAC4        | 0,51 |
| ribosomal protein S6                                                                                                                                                                                                                                                                                                                                                                                                                                                                                                                                                                                                                                                                                                                                                          | RPS6         | 0,51 |
| selenoprotein T; SELT protein; Selenoprotein T; cDNA FLJ90525 fis, clone NT2RP4001001, highly similar to Selenoprotein T [Source:UniProtKB/TrEMBL;Acc:Q6IAK0]; Transcript Identified by AceView, Entrez Gene ID(s) 51714                                                                                                                                                                                                                                                                                                                                                                                                                                                                                                                                                      | SELT; SELT.1 | 0,51 |
| REV3 like, DNA directed polymerase zeta catalytic subunit                                                                                                                                                                                                                                                                                                                                                                                                                                                                                                                                                                                                                                                                                                                     | REV3L        | 0,51 |
| pleiomorphic adenoma gene 1                                                                                                                                                                                                                                                                                                                                                                                                                                                                                                                                                                                                                                                                                                                                                   | PLAG1        | 0,51 |
| TEA domain family member 2                                                                                                                                                                                                                                                                                                                                                                                                                                                                                                                                                                                                                                                                                                                                                    | TEAD2        | 0,51 |
| apolipoprotein L, 6                                                                                                                                                                                                                                                                                                                                                                                                                                                                                                                                                                                                                                                                                                                                                           | APOL6        | 0,51 |
| ATP binding cassette subfamily C member 6                                                                                                                                                                                                                                                                                                                                                                                                                                                                                                                                                                                                                                                                                                                                     | ABCC6        | 0,51 |

|                                                                                                                          |                                  |      |
|--------------------------------------------------------------------------------------------------------------------------|----------------------------------|------|
| collagen, type XI, alpha 2                                                                                               | COL11A2                          | 0,51 |
| prostate tumor overexpressed 1; microRNA 4749                                                                            | PTOV1; MIR4749                   | 0,51 |
| carnitine O-acetyltransferase                                                                                            | CRAT                             | 0,51 |
| Transcript Identified by AceView, Entrez Gene ID(s) 5771                                                                 | PTPN2                            | 0,51 |
| dolichyl-diphosphooligosaccharide--protein glycosyltransferase subunit (non-catalytic)                                   | DDOST                            | 0,51 |
| nudix hydrolase 3                                                                                                        | NUDT3                            | 0,51 |
| chromosome 2 open reading frame 68                                                                                       | C2orf68                          | 0,51 |
| BCL2-associated athanogene 4                                                                                             | BAG4                             | 0,51 |
| kelch-like ECH-associated protein 1                                                                                      | KEAP1                            | 0,51 |
| mitochondrial ribosomal protein L17                                                                                      | MRPL17                           | 0,51 |
| LDL receptor related protein 6                                                                                           | LRP6                             | 0,51 |
| methyl-CpG binding domain protein 3                                                                                      | MBD3                             | 0,51 |
| phosphoenolpyruvate carboxykinase 2 (mitochondrial)                                                                      | PCK2                             | 0,51 |
| solute carrier family 2 (facilitated glucose transporter), member 13                                                     | SLC2A13                          | 0,51 |
| Jeck2013 ALT_ACCEPTOR, ALT_DONOR, coding, INTERNAL, intronic best transcript NM_030796                                   | VOPP1                            | 0,51 |
| family with sequence similarity 213, member B                                                                            | FAM213B                          | 0,51 |
| ARP3 actin-related protein 3 homolog B (yeast)                                                                           | ACTR3B                           | 0,51 |
| lysine (K)-specific demethylase 4B                                                                                       | KDM4B                            | 0,51 |
| dyskeratosis congenita 1, dyskerin; small nucleolar RNA, H/ACA box 36A; small nucleolar RNA, H/ACA box 56; microRNA 664b | DKC1; SNORA36A; SNORA56; MIR664B | 0,51 |
| suppressor of cytokine signaling 7                                                                                       | SOCS7                            | 0,51 |
| Fanconi anemia complementation group L                                                                                   | FANCL                            | 0,51 |
| retinoblastoma binding protein 9                                                                                         | RBBP9                            | 0,51 |
| Jeck2013 ALT_ACCEPTOR, ALT_DONOR, coding, INTERNAL, intronic best transcript NM_002841                                   | PTPRG                            | 0,51 |
| Wolf-Hirschhorn syndrome candidate 1                                                                                     | WHSC1                            | 0,51 |
| dihydrolipoamide branched chain transacylase E2                                                                          | DBT                              | 0,51 |
| glutathione S-transferase mu 4                                                                                           | GSTM4                            | 0,51 |
| von Hippel-Lindau binding protein 1                                                                                      | VBP1                             | 0,51 |
| N-acyl phosphatidylethanolamine phospholipase D                                                                          | NAPEPLD                          | 0,51 |
| MID1 interacting protein 1                                                                                               | MID1IP1                          | 0,51 |
| homeobox D3                                                                                                              | HOXD3                            | 0,51 |
| arginyl-tRNA synthetase 2, mitochondrial                                                                                 | RARS2                            | 0,51 |
| CKLF-like MARVEL transmembrane domain containing 4                                                                       | CMTM4                            | 0,51 |
| zinc finger protein 395                                                                                                  | ZNF395                           | 0,51 |
| acyl-CoA synthetase short-chain family member 2                                                                          | ACSS2                            | 0,51 |
| lysophosphatidylglycerol acyltransferase 1                                                                               | LPGAT1                           | 0,51 |
| distal-less homeobox 4                                                                                                   | DLX4                             | 0,51 |
| TBC1 domain family, member 24                                                                                            | TBC1D24                          | 0,51 |

|                                                                                         |                          |      |
|-----------------------------------------------------------------------------------------|--------------------------|------|
| DNA methyltransferase 1 associated protein 1                                            | DMAP1                    | 0,51 |
| dystroglycan 1 (dystrophin-associated glycoprotein 1)                                   | DAG1                     | 0,51 |
| jumping translocation breakpoint                                                        | JTB                      | 0,51 |
| KIAA1715                                                                                | KIAA1715                 | 0,51 |
| FSHD region gene 1 pseudogene                                                           | LOC283788;<br>AL592183.1 | 0,51 |
| prolyl 4-hydroxylase, alpha polypeptide II                                              | P4HA2                    | 0,51 |
| family with sequence similarity 53, member B                                            | FAM53B                   | 0,51 |
| ArfGAP with coiled-coil, ankyrin repeat and PH domains 3                                | ACAP3                    | 0,51 |
| hook microtubule-tethering protein 1                                                    | HOOK1                    | 0,51 |
| integrator complex subunit 2                                                            | INTS2                    | 0,51 |
| dehydrogenase E1 and transketolase domain containing 1                                  | DHTKD1                   | 0,51 |
| K(lysine) acetyltransferase 8                                                           | KAT8                     | 0,51 |
| LEO1 homolog, Paf1/RNA polymerase II complex component                                  | LEO1                     | 0,51 |
| F-box protein 4                                                                         | FBXO4                    | 0,51 |
| zinc finger, CCHC domain containing 11                                                  | ZCCHC11                  | 0,51 |
| histone cluster 1, H2ai                                                                 | HIST1H2AI                | 0,51 |
| CD14 molecule                                                                           | CD14                     | 0,51 |
| MYC binding protein; gap junction protein alpha 9                                       | MYCBP; GJA9              | 0,51 |
| Transcript Identified by AceView, Entrez Gene ID(s) 6660                                | SOX5                     | 0,51 |
| claudin 1                                                                               | CLDN1                    | 0,51 |
| post-GPI attachment to proteins 2                                                       | PGAP2                    | 0,51 |
| death-associated protein                                                                | DAP                      | 0,51 |
| core-binding factor, runt domain, alpha subunit 2;<br>translocated to, 2                | CBFA2T2                  | 0,51 |
| zinc finger protein 69                                                                  | ZNF69                    | 0,51 |
| cytoskeleton-associated protein 4                                                       | CKAP4                    | 0,51 |
| serine/threonine kinase-like domain containing 1<br>[Source:HGNC Symbol;Acc:HGNC:28669] | STKLD1                   | 0,51 |
| NCK interacting protein with SH3 domain                                                 | NCKIPSD                  | 0,51 |
| sprouty RTK signaling antagonist 2                                                      | SPRY2                    | 0,51 |
| PET117 homolog; CSRP2 binding protein                                                   | PET117; CSRP2BP          | 0,51 |
| RNA binding motif protein 10                                                            | RBM10                    | 0,51 |
| lipocalin 15                                                                            | LCN15                    | 0,51 |
| aurora kinase B                                                                         | AURKB                    | 0,51 |
| chromosome 9 open reading frame 64                                                      | C9orf64                  | 0,51 |
| cilia and flagella associated protein 97                                                | CFAP97                   | 0,51 |
| ADP-ribosylation factor like GTPase 17B; ADP-ribosylation factor like GTPase 17A        | ARL17B; ARL17A           | 0,50 |
| Sec61 translocon alpha 1 subunit                                                        | SEC61A1                  | 0,50 |
| nuclear receptor subfamily 6, group A, member 1                                         | NR6A1                    | 0,50 |

|                                                                                                            |                                      |      |
|------------------------------------------------------------------------------------------------------------|--------------------------------------|------|
| Transcript Identified by AceView, Entrez Gene ID(s) 8565                                                   | YARS                                 | 0,50 |
| hypoxia up-regulated 1                                                                                     | HYOU1                                | 0,50 |
| small nuclear ribonucleoprotein polypeptides B and B1                                                      | SNRPB                                | 0,50 |
| inositol monophosphatase domain containing 1                                                               | IMPAD1                               | 0,50 |
| dehydrogenase/reductase (SDR family) member 13                                                             | DHRS13                               | 0,50 |
| fetuin B                                                                                                   | FETUB                                | 0,50 |
| FRY microtubule binding protein                                                                            | FRY                                  | 0,50 |
| nipsnap homolog 1 (C. elegans)                                                                             | NIPSNAP1                             | 0,50 |
| death-associated protein kinase 1                                                                          | DAPK1                                | 0,50 |
| cytochrome b5 domain containing 2                                                                          | CYB5D2                               | 0,50 |
| suppression of tumorigenicity 7; ST7 overlapping transcript 4; ST7 overlapping transcript 3; microRNA 6132 | ST7; ST7-OT4;<br>ST7-OT3;<br>MIR6132 | 0,50 |
| ataxin 7-like 3B                                                                                           | ATXN7L3B                             | 0,50 |
| Dexi homolog (mouse)                                                                                       | DEXI                                 | 0,50 |
| GTP cyclohydrolase I feedback regulator                                                                    | GCHFR                                | 0,50 |
| histone cluster 1, H2aj                                                                                    | HIST1H2AJ                            | 0,50 |
| naked cuticle homolog 1 (Drosophila)                                                                       | NKD1                                 | 0,50 |
| aldehyde dehydrogenase 16 family, member A1                                                                | ALDH16A1                             | 0,50 |
| proteasome activator subunit 1                                                                             | PSME1                                | 0,50 |
| helicase with zinc finger                                                                                  | HELZ                                 | 0,50 |
| chromosome 2 open reading frame 15                                                                         | C2orf15                              | 0,50 |
| HAUS augmin like complex subunit 4; microRNA 4707                                                          | HAUS4; MIR4707                       | 0,50 |
| calcium/calmodulin-dependent protein kinase kinase 2, beta                                                 | CAMKK2                               | 0,50 |
| Alstrom syndrome protein 1                                                                                 | ALMS1                                | 0,50 |
| inter-alpha-trypsin inhibitor heavy chain family, member 4                                                 | ITIH4                                | 0,50 |
| mitochondrial ribosomal protein S26                                                                        | MRPS26                               | 0,50 |
| plexin B1                                                                                                  | PLXNB1                               | 0,50 |
| G-2 and S-phase expressed 1                                                                                | GTSE1                                | 0,50 |
| N-acetylglucosaminidase, alpha                                                                             | NAGLU                                | 0,50 |
| SUMO-interacting motifs containing 1                                                                       | SIMC1                                | 0,50 |
| KCTD21 antisense RNA 1                                                                                     | KCTD21-AS1                           | 0,50 |
| BLOC-1 related complex subunit 7                                                                           | BORCS7                               | 0,50 |
| polyamine-modulated factor 1; PMF1-BGLAP readthrough; bone gamma-carboxyglutamate (gla) protein            | PMF1; PMF1-BGLAP; BGLAP              | 0,50 |
| centrosomal protein 57kDa                                                                                  | CEP57                                | 0,50 |
| immediate early response 3 interacting protein 1                                                           | IER3IP1                              | 0,50 |
| cyclin G1                                                                                                  | CCNG1                                | 0,50 |
| ADP-ribosylation factor like GTPase 5A                                                                     | ARL5A                                | 0,50 |
| zinc finger protein 3                                                                                      | ZNF3                                 | 0,50 |
| TGFB-induced factor homeobox 2                                                                             | TGIF2                                | 0,50 |



|                                                                                                                                                                                                                             |                                        |      |
|-----------------------------------------------------------------------------------------------------------------------------------------------------------------------------------------------------------------------------|----------------------------------------|------|
| signal sequence receptor, delta                                                                                                                                                                                             | SSR4                                   | 0,50 |
| A kinase (PRKA) anchor protein 1                                                                                                                                                                                            | AKAP1                                  | 0,50 |
| alkylglycerone phosphate synthase                                                                                                                                                                                           | AGPS                                   | 0,50 |
| AU RNA binding protein/enoyl-CoA hydratase                                                                                                                                                                                  | AUH                                    | 0,50 |
| guanine nucleotide binding protein (G protein), alpha 11 (Gq class)                                                                                                                                                         | GNA11                                  | 0,50 |
| mitochondrial ribosomal protein L23                                                                                                                                                                                         | MRPL23                                 | 0,50 |
| ADAM metallopeptidase domain 10                                                                                                                                                                                             | ADAM10                                 | 0,50 |
| mediator complex subunit 4                                                                                                                                                                                                  | MED4                                   | 0,50 |
| glycine amidinotransferase (L-arginine:glycine amidinotransferase)                                                                                                                                                          | GATM                                   | 0,50 |
| ash2 (absent, small, or homeotic)-like (Drosophila)                                                                                                                                                                         | ASH2L                                  | 0,50 |
| retinoid X receptor alpha; microRNA 4669                                                                                                                                                                                    | RXRA; MIR4669                          | 0,50 |
| abhydrolase domain containing 14A                                                                                                                                                                                           | ABHD14A                                | 0,50 |
| nuclear receptor coactivator 4                                                                                                                                                                                              | NCOA4                                  | 0,50 |
| SET domain containing 5                                                                                                                                                                                                     | SETD5                                  | 0,50 |
| solute carrier family 39, member 9                                                                                                                                                                                          | SLC39A9                                | 0,50 |
| frizzled class receptor 5                                                                                                                                                                                                   | FZD5                                   | 0,50 |
| ATP synthase, H <sup>+</sup> transporting, mitochondrial F1 complex, alpha subunit 1, cardiac muscle                                                                                                                        | ATP5A1                                 | 0,50 |
| transmembrane protein 106A                                                                                                                                                                                                  | TMEM106A                               | 0,50 |
| ribosomal protein S19                                                                                                                                                                                                       | RPS19                                  | 0,50 |
| phosphodiesterase 9A                                                                                                                                                                                                        | PDE9A                                  | 0,50 |
| family with sequence similarity 57, member A                                                                                                                                                                                | FAM57A                                 | 0,50 |
| Zhang2013 ALT_ACCEPTOR, ALT_DONOR, coding, INTERNAL, intronic best transcript NM_152227                                                                                                                                     | SNX5                                   | 0,50 |
| Homo sapiens mitochondrial ribosomal protein L23 (MRPL23), mRNA.; 39S ribosomal protein L23, mitochondrial-like; Homo sapiens mitochondrial ribosomal protein L23, mRNA (cDNA clone MGC:12795 IMAGE:4298000), complete cds. | MRPL23;<br>LOC102724828;<br>AC004556.1 | 0,50 |
| solute carrier family 36 (proton/amino acid symporter), member 4                                                                                                                                                            | SLC36A4                                | 0,50 |
| transmembrane protein 165                                                                                                                                                                                                   | TMEM165                                | 0,50 |
| solute carrier family 7 (amino acid transporter light chain, bo,+ system), member 9                                                                                                                                         | SLC7A9                                 | 0,50 |
| myeloid/lymphoid or mixed-lineage leukemia; translocated to, 4                                                                                                                                                              | MLLT4                                  | 0,50 |
| zinc finger, CCHC domain containing 14                                                                                                                                                                                      | ZCCHC14                                | 0,50 |
| chromodomain helicase DNA binding protein 6                                                                                                                                                                                 | CHD6                                   | 0,50 |
| ADP-ribosylation factor GTPase activating protein 3                                                                                                                                                                         | ARFGAP3                                | 0,50 |
| KIAA0895                                                                                                                                                                                                                    | KIAA0895                               | 0,50 |
| protocadherin beta 5                                                                                                                                                                                                        | PCDHB5                                 | 0,49 |
| v-akt murine thymoma viral oncogene homolog 1                                                                                                                                                                               | AKT1                                   | 0,49 |
| polymerase (RNA) II (DNA directed) polypeptide H                                                                                                                                                                            | POLR2H                                 | 0,49 |

|                                                                                              |                     |      |
|----------------------------------------------------------------------------------------------|---------------------|------|
| DnaJ (Hsp40) homolog, subfamily C, member 22                                                 | DNAJC22             | 0,49 |
| orosomucoid 2                                                                                | ORM2                | 0,49 |
| Raf-1 proto-oncogene, serine/threonine kinase                                                | RAF1                | 0,49 |
| fibulin 1                                                                                    | FBLN1               | 0,49 |
| Jeck2013 ALT_DONOR, coding, INTERNAL, intronic best transcript NM_152227                     | SNX5                | 0,49 |
| paralemmin 3                                                                                 | PALM3               | 0,49 |
| family with sequence similarity 195, member B                                                | FAM195B             | 0,49 |
| solute carrier family 26 (anion exchanger), member 1                                         | SLC26A1             | 0,49 |
| gasdermin D                                                                                  | GSDMD               | 0,49 |
| inter-alpha-trypsin inhibitor heavy chain 2                                                  | ITIH2               | 0,49 |
| pecanex-like 3 (Drosophila)                                                                  | PCNXL3              | 0,49 |
| cell migration inducing protein, hyaluronan binding                                          | CEMIP               | 0,49 |
| signal peptidase complex subunit 2                                                           | SPCS2               | 0,49 |
| microRNA 1199                                                                                | MIR1199             | 0,49 |
| REX4 homolog, 3'-5' exonuclease [Source:HGNC Symbol;Acc:HGNC:12820]                          | REXO4               | 0,49 |
| histone cluster 1, H4j                                                                       | HIST1H4J            | 0,49 |
| dihydrolipoamide S-acetyltransferase                                                         | DLAT                | 0,49 |
| enoyl-CoA delta isomerase 2                                                                  | ECI2                | 0,49 |
| carbonic anhydrase IX                                                                        | CA9                 | 0,49 |
| KIAA1919                                                                                     | KIAA1919            | 0,49 |
| transformation/transcription domain-associated protein                                       | TRRAP               | 0,49 |
| alcohol dehydrogenase 5 (class III), chi polypeptide                                         | ADH5                | 0,49 |
| phosphatidylinositol glycan anchor biosynthesis class N                                      | PIGN                | 0,49 |
| ATPase, aminophospholipid transporter, class I, type 8B, member 2                            | ATP8B2              | 0,49 |
| coiled-coil domain containing 138                                                            | CCDC138             | 0,49 |
| ATPase, class V, type 10A                                                                    | ATP10A              | 0,49 |
| FUS RNA binding protein                                                                      | FUS                 | 0,49 |
| dihydropyrimidine dehydrogenase                                                              | DPYD                | 0,49 |
| adenylate cyclase 1 (brain)                                                                  | ADCY1               | 0,49 |
| nucleoporin 160kDa                                                                           | NUP160              | 0,49 |
| NFKB activating protein                                                                      | NKAP                | 0,49 |
| family with sequence similarity 156, member B; family with sequence similarity 156, member A | FAM156B;<br>FAM156A | 0,49 |
| phosphatidylinositol glycan anchor biosynthesis class F                                      | PIGF                | 0,49 |
| SEC24 homolog A, COPII coat complex component                                                | SEC24A              | 0,49 |
| SEC16 homolog B, endoplasmic reticulum export factor                                         | SEC16B              | 0,49 |
| ATPase family, AAA domain containing 5                                                       | ATAD5               | 0,49 |
| mesoderm induction early response 1, family member 3                                         | MIER3               | 0,49 |
| trafficking protein particle complex 4                                                       | TRAPPC4             | 0,49 |
| carbonyl reductase 4                                                                         | CBR4                | 0,49 |
| ring finger protein 19A, RBR E3 ubiquitin protein ligase                                     | RNF19A              | 0,49 |
| dishevelled associated activator of morphogenesis 1                                          | DAAM1               | 0,49 |

|                                                                                  |           |      |
|----------------------------------------------------------------------------------|-----------|------|
| pituitary tumor-transforming 1                                                   | PTTG1     | 0,49 |
| selenophosphate synthetase 1                                                     | SEPHS1    | 0,49 |
| ring finger protein 187                                                          | RNF187    | 0,49 |
| zinc finger, RAN-binding domain containing 3                                     | ZRANB3    | 0,49 |
| zinc finger protein 460                                                          | ZNF460    | 0,49 |
| 5-methyltetrahydrofolate-homocysteine<br>methyltransferase                       | MTR       | 0,49 |
| transmembrane protein 140                                                        | TMEM140   | 0,49 |
| solute carrier family 25, member 40                                              | SLC25A40  | 0,49 |
| general transcription factor Ili                                                 | GTF2I     | 0,49 |
| homeobox and leucine zipper encoding                                             | HOMEZ     | 0,49 |
| ubiquitin specific peptidase 13 (isopeptidase T-3)                               | USP13     | 0,49 |
| LEM domain containing 2                                                          | LEMD2     | 0,49 |
| Ral GEF with PH domain and SH3 binding motif 1                                   | RALGPS1   | 0,49 |
| ATM serine/threonine kinase                                                      | ATM       | 0,49 |
| solute carrier family 25, member 30                                              | SLC25A30  | 0,49 |
| NADH dehydrogenase (ubiquinone) complex I, assembly<br>factor 6                  | NDUFAF6   | 0,49 |
| ceramide synthase 4                                                              | CERS4     | 0,49 |
| family with sequence similarity 234, member B                                    | FAM234B   | 0,49 |
| T-box 2                                                                          | TBX2      | 0,49 |
| zinc finger protein 782                                                          | ZNF782    | 0,49 |
| ankyrin repeat domain 52                                                         | ANKRD52   | 0,49 |
| minichromosome maintenance complex component 2                                   | MCM2      | 0,49 |
| thioredoxin domain containing 16                                                 | TXNDC16   | 0,49 |
| protein tyrosine phosphatase, mitochondrial 1                                    | PTPMT1    | 0,49 |
| phosphoinositide-3-kinase, regulatory subunit 1 (alpha)                          | PIK3R1    | 0,49 |
| chromobox homolog 8                                                              | CBX8      | 0,49 |
| ATP synthase, H <sup>+</sup> transporting, mitochondrial Fo complex<br>subunit E | ATP5I     | 0,49 |
| chromosome 21 open reading frame 140                                             | C21orf140 | 0,49 |
| chromosome 21 open reading frame 140                                             | C21orf140 | 0,49 |
| ubiquitin specific peptidase 34                                                  | USP34     | 0,49 |
| dystrophin                                                                       | DMD       | 0,49 |
| CD320 molecule                                                                   | CD320     | 0,49 |
| iron responsive element binding protein 2                                        | IREB2     | 0,49 |
| UDP-Gal:betaGal beta 1,3-galactosyltransferase 6                                 | B3GALT6   | 0,49 |
| serine peptidase inhibitor, Kazal type 1                                         | SPINK1    | 0,49 |
| chromosome 3 open reading frame 33                                               | C3orf33   | 0,49 |
| mutS homolog 2                                                                   | MSH2      | 0,49 |

|                                                                                                                                                                                                                                                                                                                                                                          |                        |      |
|--------------------------------------------------------------------------------------------------------------------------------------------------------------------------------------------------------------------------------------------------------------------------------------------------------------------------------------------------------------------------|------------------------|------|
| selenoprotein O; selenoprotein O<br>[Source:EntrezGene;Acc:83642]; Salzman2013<br>ANNOTATED, CDS, coding, INTERNAL, OVCODE,<br>OVERLAPTX, OVEXON best transcript NM_031454;<br>Salzman2013 ANNOTATED, CDS, coding, OVCODE,<br>OVERLAPTX, OVEXON, UTR3 best transcript NM_031454;<br>Transcript Identified by AceView, Entrez Gene ID(s)<br>83642, RefSeq ID(s) NM_031454 | SELO                   | 0,49 |
| interleukin 22 receptor, alpha 1                                                                                                                                                                                                                                                                                                                                         | IL22RA1                | 0,49 |
| family with sequence similarity 13, member B                                                                                                                                                                                                                                                                                                                             | FAM13B                 | 0,48 |
| apoptosis-inducing factor, mitochondrion-associated, 3                                                                                                                                                                                                                                                                                                                   | AIFM3                  | 0,48 |
| SWI/SNF related, matrix associated, actin dependent<br>regulator of chromatin, subfamily d, member 2                                                                                                                                                                                                                                                                     | SMARCD2                | 0,48 |
| Bardet-Biedl syndrome 5                                                                                                                                                                                                                                                                                                                                                  | BBS5                   | 0,48 |
| nucleoside-triphosphatase, cancer-related                                                                                                                                                                                                                                                                                                                                | NTPCR                  | 0,48 |
| short coiled-coil protein                                                                                                                                                                                                                                                                                                                                                | SCOC                   | 0,48 |
| phospholipid phosphatase 3                                                                                                                                                                                                                                                                                                                                               | PLPP3                  | 0,48 |
| zinc finger protein 217                                                                                                                                                                                                                                                                                                                                                  | ZNF217                 | 0,48 |
| Transcript Identified by AceView, Entrez Gene ID(s) 8660                                                                                                                                                                                                                                                                                                                 | IRS2                   | 0,48 |
| cytochrome c oxidase assembly factor 5                                                                                                                                                                                                                                                                                                                                   | COA5                   | 0,48 |
| poly(ADP-ribose) polymerase family member 12                                                                                                                                                                                                                                                                                                                             | PARP12                 | 0,48 |
| pygopus family PHD finger 2                                                                                                                                                                                                                                                                                                                                              | PYGO2                  | 0,48 |
| solute carrier family 7 (neutral amino acid transporter<br>light chain, asc system), member 10                                                                                                                                                                                                                                                                           | SLC7A10                | 0,48 |
| alkB homolog 5, RNA demethylase                                                                                                                                                                                                                                                                                                                                          | ALKBH5                 | 0,48 |
| phytanoyl-CoA 2-hydroxylase                                                                                                                                                                                                                                                                                                                                              | PHYH                   | 0,48 |
| homeodomain interacting protein kinase 2                                                                                                                                                                                                                                                                                                                                 | HIPK2                  | 0,48 |
| MAM and LDL receptor class A domain containing 1                                                                                                                                                                                                                                                                                                                         | MALRD1                 | 0,48 |
| serum/glucocorticoid regulated kinase family, member 3;<br>C8orf44-SGK3 readthrough                                                                                                                                                                                                                                                                                      | SGK3; C8orf44-<br>SGK3 | 0,48 |
| surfeit 4                                                                                                                                                                                                                                                                                                                                                                | SURF4                  | 0,48 |
| UHRF1 binding protein 1                                                                                                                                                                                                                                                                                                                                                  | UHRF1BP1               | 0,48 |
| DDB1 and CUL4 associated factor 11                                                                                                                                                                                                                                                                                                                                       | DCAF11                 | 0,48 |
| adenylate cyclase 6; microRNA 4701                                                                                                                                                                                                                                                                                                                                       | ADCY6; MIR4701         | 0,48 |
| zinc finger protein 219                                                                                                                                                                                                                                                                                                                                                  | ZNF219                 | 0,48 |
| talin 2                                                                                                                                                                                                                                                                                                                                                                  | TLN2                   | 0,48 |
| inner centromere protein                                                                                                                                                                                                                                                                                                                                                 | INCENP                 | 0,48 |
| solute carrier family 35 (UDP-GlcNAc/UDP-glucose<br>transporter), member D2                                                                                                                                                                                                                                                                                              | SLC35D2                | 0,48 |
| glucoside xylosyltransferase 2                                                                                                                                                                                                                                                                                                                                           | GXYLT2                 | 0,48 |
| musashi RNA binding protein 2                                                                                                                                                                                                                                                                                                                                            | MSI2                   | 0,48 |
| nudix hydrolase 8                                                                                                                                                                                                                                                                                                                                                        | NUDT8                  | 0,48 |
| REST corepressor 2                                                                                                                                                                                                                                                                                                                                                       | RCOR2                  | 0,48 |
| WW domain containing oxidoreductase                                                                                                                                                                                                                                                                                                                                      | WWOX                   | 0,48 |

|                                                                                                                                                                               |                                 |      |
|-------------------------------------------------------------------------------------------------------------------------------------------------------------------------------|---------------------------------|------|
| UDP-Gal:betaGlcNAc beta 1,4- galactosyltransferase, polypeptide 4                                                                                                             | B4GALT4                         | 0,48 |
| WAS protein family, member 3                                                                                                                                                  | WASF3                           | 0,48 |
| nuclear receptor coactivator 7                                                                                                                                                | NCOA7                           | 0,48 |
| IMP3, U3 small nucleolar ribonucleoprotein                                                                                                                                    | IMP3                            | 0,48 |
| catalase                                                                                                                                                                      | CAT                             | 0,48 |
| mediator complex subunit 30                                                                                                                                                   | MED30                           | 0,48 |
| leukemia NUP98 fusion partner 1                                                                                                                                               | LNP1                            | 0,48 |
| CD46 molecule, complement regulatory protein                                                                                                                                  | CD46                            | 0,48 |
| fms-related tyrosine kinase 3 ligand                                                                                                                                          | FLT3LG                          | 0,48 |
| ATP binding cassette subfamily A member 1                                                                                                                                     | ABCA1                           | 0,48 |
| protein kinase, cAMP-dependent, regulatory, type I, alpha                                                                                                                     | PRKAR1A                         | 0,48 |
| ephrin-A3                                                                                                                                                                     | EFNA3                           | 0,48 |
| N-deacetylase/N-sulfotransferase (heparan glucosaminy) 1                                                                                                                      | NDST1                           | 0,48 |
| membrane bound transcription factor peptidase, site 1                                                                                                                         | MBTPS1                          | 0,48 |
| chromosome 6 open reading frame 48; small nucleolar RNA, C/D box 52; small nucleolar RNA, C/D box 48                                                                          | C6orf48;<br>SNORD52;<br>SNORD48 | 0,48 |
| transcription elongation factor A (SII), 2                                                                                                                                    | TCEA2                           | 0,48 |
| nuclear factor I/A                                                                                                                                                            | NFIA                            | 0,48 |
| notum pectinacetyltransferase homolog (Drosophila)                                                                                                                            | NOTUM                           | 0,48 |
| TM2 domain containing 3                                                                                                                                                       | TM2D3                           | 0,48 |
| tubulin, delta 1                                                                                                                                                              | TUBD1                           | 0,48 |
| mitochondrial fission regulator 1                                                                                                                                             | MTFR1                           | 0,48 |
| glyceronephosphate O-acyltransferase                                                                                                                                          | GNPAT                           | 0,48 |
| solute carrier family 9, subfamily B (NHA2, cation proton antiporter 2), member 2                                                                                             | SLC9B2                          | 0,48 |
| ATP/GTP binding protein-like 5                                                                                                                                                | AGBL5                           | 0,48 |
| decapping mRNA 2                                                                                                                                                              | DCP2                            | 0,48 |
| family with sequence similarity 20, member B                                                                                                                                  | FAM20B                          | 0,48 |
| transient receptor potential cation channel, subfamily V, member 1                                                                                                            | TRPV1                           | 0,48 |
| enoyl-CoA hydratase 1, peroxisomal                                                                                                                                            | ECH1                            | 0,48 |
| SIVA1, apoptosis-inducing factor                                                                                                                                              | SIVA1                           | 0,48 |
| KDEL (Lys-Asp-Glu-Leu) containing 2                                                                                                                                           | KDELC2                          | 0,48 |
| N-acetyltransferase 8-like (GCN5-related, putative)                                                                                                                           | NAT8L                           | 0,48 |
| Salzman2013 ALT_ACCEPTOR, CDS, coding, INTERNAL, OVCODE, OVEXON best transcript NM_004892; Salzman2013 ANNOTATED, CDS, coding, OVCODE, OVEXON, UTR3 best transcript NM_004892 | SEC22B                          | 0,48 |
| MACRO domain containing 1                                                                                                                                                     | MACROD1                         | 0,48 |
| phosphatidylinositol glycan anchor biosynthesis class V                                                                                                                       | PIGV                            | 0,48 |
| peroxisomal biogenesis factor 13                                                                                                                                              | PEX13                           | 0,48 |

|                                                                                                                                  |                             |      |
|----------------------------------------------------------------------------------------------------------------------------------|-----------------------------|------|
| Memczak2013 ANTISENSE, coding, INTERNAL, intronic best transcript NM_181893                                                      | UBE2D3                      | 0,48 |
| phosphoglycolate phosphatase                                                                                                     | PGP                         | 0,48 |
| zinc finger protein 780A                                                                                                         | ZNF780A                     | 0,47 |
| ubiquitin-conjugating enzyme E2, J1                                                                                              | UBE2J1                      | 0,47 |
| CCAAT/enhancer binding protein (C/EBP), gamma                                                                                    | CEBPG                       | 0,47 |
| upstream transcription factor family member 3                                                                                    | USF3                        | 0,47 |
| DTW domain containing 2                                                                                                          | DTWD2                       | 0,47 |
| nuclear factor of activated T-cells, cytoplasmic, calcineurin-dependent 3                                                        | NFATC3                      | 0,47 |
| vascular endothelial growth factor A                                                                                             | VEGFA                       | 0,47 |
| Memczak2013 ANTISENSE, CDS, coding, INTERNAL best transcript NM_022047                                                           | DEF6                        | 0,47 |
| mitochondrial calcium uptake 1                                                                                                   | MICU1                       | 0,47 |
| kinesin family member 11                                                                                                         | KIF11                       | 0,47 |
| desmocollin 2                                                                                                                    | DSC2                        | 0,47 |
| COMM domain containing 2                                                                                                         | COMMD2                      | 0,47 |
| RAR-related orphan receptor A                                                                                                    | RORA                        | 0,47 |
| mannosyl (alpha-1,3-)-glycoprotein beta-1,2-N-acetylglucosaminyltransferase                                                      | MGAT1                       | 0,47 |
| testis expressed 2                                                                                                               | TEX2                        | 0,47 |
| chromosome 21 open reading frame 33                                                                                              | C21orf33                    | 0,47 |
| Transcript Identified by AceView, Entrez Gene ID(s) 27086; novel transcript, sense intronic to FOXP1                             | FOXP1; RP11-298C2.1         | 0,47 |
| sirtuin 4                                                                                                                        | SIRT4                       | 0,47 |
| adrenergic, beta, receptor kinase 1                                                                                              | ADRBK1                      | 0,47 |
| zinc finger protein, Y-linked                                                                                                    | ZFY                         | 0,47 |
| cell division cycle 23                                                                                                           | CDC23                       | 0,47 |
| elongator acetyltransferase complex subunit 6                                                                                    | ELP6                        | 0,47 |
| zinc finger protein 614                                                                                                          | ZNF614                      | 0,47 |
| ATPase family, AAA domain containing 2B                                                                                          | ATAD2B                      | 0,47 |
| NPR2-like, GATOR1 complex subunit                                                                                                | NPRL2                       | 0,47 |
| trans-golgi network vesicle protein 23 homolog C (S. cerevisiae); CMT1A duplicated region transcript 4; TVP23C-CDRT4 readthrough | TVP23C; CDRT4; TVP23C-CDRT4 | 0,47 |
| glutaminyl-peptide cyclotransferase-like                                                                                         | QPCTL                       | 0,47 |
| calumenin                                                                                                                        | CALU                        | 0,47 |
| atractin                                                                                                                         | ATRNL                       | 0,47 |
| collagen, type II, alpha 1                                                                                                       | COL2A1                      | 0,47 |
| echinoderm microtubule associated protein like 4                                                                                 | EML4                        | 0,47 |
| PRELI domain containing 2                                                                                                        | PRELID2                     | 0,47 |
| MAGE family member D2                                                                                                            | MAGED2                      | 0,47 |
| solute carrier family 22 (organic anion transporter), member 7                                                                   | SLC22A7                     | 0,47 |
| interleukin 7                                                                                                                    | IL7                         | 0,47 |

|                                                                        |          |      |
|------------------------------------------------------------------------|----------|------|
| Transcript Identified by AceView, Entrez Gene ID(s)<br>378465; 65125   | WNK1     | 0,47 |
| N-acetylated alpha-linked acidic dipeptidase-like 1                    | NAALADL1 | 0,47 |
| SET domain, bifurcated 2                                               | SETDB2   | 0,47 |
| retinoblastoma binding protein 4                                       | RBBP4    | 0,47 |
| solute carrier family 31 (copper transporter), member 1                | SLC31A1  | 0,47 |
| ARP1 actin-related protein 1 homolog B, centractin beta<br>(yeast)     | ACTR1B   | 0,47 |
| family with sequence similarity 222, member A                          | FAM222A  | 0,47 |
| ER membrane protein complex subunit 8                                  | EMC8     | 0,47 |
| baculoviral IAP repeat containing 6                                    | BIRC6    | 0,47 |
| G kinase anchoring protein 1                                           | GKAP1    | 0,47 |
| histone cluster 1, H1b                                                 | HIST1H1B | 0,47 |
| prospero homeobox 1                                                    | PROX1    | 0,47 |
| F-box and leucine-rich repeat protein 21<br>(gene/pseudogene)          | FBXL21   | 0,47 |
| phospholipid phosphatase 5                                             | PLPP5    | 0,47 |
| tripartite motif containing 65                                         | TRIM65   | 0,47 |
| triosephosphate isomerase 1                                            | TPI1     | 0,47 |
| heat shock protein 70kDa family, member 13                             | HSPA13   | 0,47 |
| patatin-like phospholipase domain containing 2                         | PNPLA2   | 0,47 |
| chloride channel, voltage-sensitive 6                                  | CLCN6    | 0,47 |
| sulfite oxidase                                                        | SUOX     | 0,47 |
| mitochondrial ribosomal protein L50                                    | MRPL50   | 0,47 |
| proline-rich transmembrane protein 1                                   | PRRT1    | 0,47 |
| guanine nucleotide binding protein (G protein), alpha z<br>polypeptide | GNAZ     | 0,47 |
| small integral membrane protein 3                                      | SMIM3    | 0,47 |
| calcium modulating ligand                                              | CAMLG    | 0,47 |
| ribosomal protein S27-like                                             | RPS27L   | 0,47 |
| PWWP domain containing 2A                                              | PWWP2A   | 0,47 |
| FAD-dependent oxidoreductase domain containing 2                       | FOXRED2  | 0,47 |
| lethal giant larvae homolog 2 (Drosophila)                             | LLGL2    | 0,47 |
| transient receptor potential cation channel, subfamily C,<br>member 1  | TRPC1    | 0,47 |
| sterol regulatory element binding transcription factor 2               | SREBF2   | 0,47 |
| zinc finger protein 362                                                | ZNF362   | 0,46 |
| Transcript Identified by AceView, Entrez Gene ID(s) 8613               | PPAP2B   | 0,46 |
| protein-O-mannose kinase                                               | POMK     | 0,46 |
| Transcript Identified by AceView, Entrez Gene ID(s) 5825               | ABCD3    | 0,46 |
| isovaleryl-CoA dehydrogenase                                           | IVD      | 0,46 |
| chromosome 15 open reading frame 40                                    | C15orf40 | 0,46 |
| cystatin C                                                             | CST3     | 0,46 |

|                                                                              |                 |      |
|------------------------------------------------------------------------------|-----------------|------|
| leucine rich repeat and coiled-coil centrosomal protein 1                    | LRRCC1          | 0,46 |
| LDL receptor related protein 11                                              | LRP11           | 0,46 |
| ets variant 4                                                                | ETV4            | 0,46 |
| glutaminyl-tRNA synthetase; microRNA 6890                                    | QARS; MIR6890   | 0,46 |
| apolipoprotein B                                                             | APOB            | 0,46 |
| acyl-CoA synthetase long-chain family member 3                               | ACSL3           | 0,46 |
| potassium channel tetramerization domain containing 6                        | KCTD6           | 0,46 |
| V-set and immunoglobulin domain containing 10                                | VSIG10          | 0,46 |
| cullin-associated and neddylation-dissociated 1                              | CAND1           | 0,46 |
| RING1 and YY1 binding protein                                                | RYBP            | 0,46 |
| lysozyme                                                                     | LYZ             | 0,46 |
| ST20-MTHFS readthrough                                                       | ST20-MTHFS      | 0,46 |
| RALBP1 associated Eps domain containing 2                                    | REPS2           | 0,46 |
| heterogeneous nuclear ribonucleoprotein A0                                   | HNRNPA0         | 0,46 |
| NME/NM23 nucleoside diphosphate kinase 4                                     | NME4            | 0,46 |
| galactose-3-O-sulfotransferase 1                                             | GAL3ST1         | 0,46 |
| ring finger protein 170; microRNA 4469                                       | RNF170; MIR4469 | 0,46 |
| protein phosphatase 1, catalytic subunit, gamma isozyme                      | PPP1CC          | 0,46 |
| abhydrolase domain containing 10                                             | ABHD10          | 0,46 |
| LSM6 homolog, U6 small nuclear RNA and mRNA degradation associated           | LSM6            | 0,46 |
| hormonally up-regulated Neu-associated kinase                                | HUNK            | 0,46 |
| PAN2 poly(A) specific ribonuclease subunit; canopy FGF signaling regulator 2 | PAN2; CNPY2     | 0,46 |
| Ly6/neurotoxin 1                                                             | LYNX1           | 0,46 |
| hypoxia up-regulated 1                                                       | HYOU1           | 0,46 |
| nuclear autoantigenic sperm protein (histone-binding)                        | NASP            | 0,46 |
| ligand dependent nuclear receptor corepressor like                           | LCORL           | 0,46 |
| transcription factor AP-4 (activating enhancer binding protein 4)            | TFAP4           | 0,46 |
| protease-associated domain containing 1                                      | PRADC1          | 0,46 |
| pseudouridylate synthase 7-like                                              | PUS7L           | 0,46 |
| egl-9 family hypoxia-inducible factor 3                                      | EGLN3           | 0,46 |
| rhotekin                                                                     | RTKN            | 0,46 |
| 3-phosphoinositide dependent protein kinase 1                                | PDPK1           | 0,46 |
| B9 protein domain 1                                                          | B9D1            | 0,46 |
| lipoic acid synthetase                                                       | LIAS            | 0,46 |
| coiled-coil domain containing 85C                                            | CCDC85C         | 0,46 |
| spalt-like transcription factor 1                                            | SALL1           | 0,46 |
| formin like 2                                                                | FMNL2           | 0,46 |
| zinc finger protein 512B                                                     | ZNF512B         | 0,46 |
| chloride channel, voltage-sensitive 2                                        | CLCN2           | 0,46 |



|                                                                                                      |                         |      |
|------------------------------------------------------------------------------------------------------|-------------------------|------|
| visinin like 1                                                                                       | VSNL1                   | 0,46 |
| zinc finger, AN1-type domain 2B                                                                      | ZFAND2B                 | 0,46 |
| PQ loop repeat containing 1                                                                          | PQLC1                   | 0,46 |
| bleomycin hydrolase                                                                                  | BLMH                    | 0,46 |
| methylenetetrahydrofolate dehydrogenase (NADP+ dependent) 2, methenyltetrahydrofolate cyclohydrolase | MTHFD2                  | 0,46 |
| histone cluster 1, H2a1; histone cluster 1, H2bn                                                     | HIST1H2AL;<br>HIST1H2BN | 0,46 |
| nuclear receptor subfamily 5, group A, member 1                                                      | NR5A1                   | 0,46 |
| surfeit 4                                                                                            | SURF4                   | 0,46 |
| geranylgeranyl diphosphate synthase 1                                                                | GGPS1                   | 0,46 |
| folliculin interacting protein 2                                                                     | FNIP2                   | 0,46 |
| tetraspanin 9                                                                                        | TSPAN9                  | 0,46 |
| cell division cycle 14B                                                                              | CDC14B                  | 0,46 |
| zinc finger, DHHC-type containing 4                                                                  | ZDHHC4                  | 0,46 |
| NADH dehydrogenase (ubiquinone) 1 beta subcomplex, 11, 17.3kDa                                       | NDUFB11                 | 0,46 |
| sema domain, immunoglobulin domain (Ig), short basic domain, secreted, (semaphorin) 3A               | SEMA3A                  | 0,46 |
| proline rich 4 (lacrimal)                                                                            | PRR4                    | 0,46 |
| 2-phosphoxylose phosphatase 1                                                                        | PXYLP1                  | 0,46 |
| NLR family, apoptosis inhibitory protein                                                             | NAIP                    | 0,46 |
| exostosin glycosyltransferase 2                                                                      | EXT2                    | 0,46 |
| orosomucoid 1                                                                                        | ORM1                    | 0,46 |
| arrestin, beta 1                                                                                     | ARRB1                   | 0,46 |
| CTD small phosphatase like                                                                           | CTDSPL                  | 0,46 |
| PDZ binding kinase                                                                                   | PBK                     | 0,46 |
| ankyrin repeat domain 17                                                                             | ANKRD17                 | 0,46 |
| carbohydrate (N-acetylgalactosamine 4-O) sulfotransferase 14                                         | CHST14                  | 0,46 |
| MYC-associated zinc finger protein (purine-binding transcription factor)                             | MAZ                     | 0,46 |
| 5,10-methenyltetrahydrofolate synthetase (5-formyltetrahydrofolate cyclo-ligase)                     | MTHFS                   | 0,46 |
| leucine rich repeat and Ig domain containing 4                                                       | LINGO4                  | 0,46 |
| surfeit 4                                                                                            | SURF4                   | 0,46 |
| family with sequence similarity 189, member B                                                        | FAM189B                 | 0,46 |
| dual specificity phosphatase 16                                                                      | DUSP16                  | 0,46 |
| histone cluster 1, H4e                                                                               | HIST1H4E                | 0,46 |
| POP7 homolog, ribonuclease P/MRP subunit                                                             | POP7                    | 0,46 |
| RAN binding protein 3-like                                                                           | RANBP3L                 | 0,46 |
| histone cluster 1, H1c                                                                               | HIST1H1C                | 0,45 |
| phosphoglucomutase 3                                                                                 | PGM3                    | 0,45 |
| bone morphogenetic protein receptor type IA                                                          | BMPR1A                  | 0,45 |
| carboxypeptidase D                                                                                   | CPD                     | 0,45 |

|                                                                                                 |                        |      |
|-------------------------------------------------------------------------------------------------|------------------------|------|
| hydroxyacylglutathione hydrolase                                                                | HAGH                   | 0,45 |
| mannosidase, alpha, class 1A, member 2                                                          | MAN1A2                 | 0,45 |
| importin 5                                                                                      | IPO5                   | 0,45 |
| CCR4-NOT transcription complex subunit 6-like                                                   | CNOT6L                 | 0,45 |
| coiled-coil domain containing 163, pseudogene                                                   | CCDC163P               | 0,45 |
| EPH receptor A1                                                                                 | EPHA1                  | 0,45 |
| taste receptor, type 2, member 30; taste receptor, type 2, member 43; proline rich 4 (lacrimal) | TAS2R30; TAS2R43; PRR4 | 0,45 |
| zinc finger, MYND-type containing 19                                                            | ZMYND19                | 0,45 |
| proteasome subunit beta 9                                                                       | PSMB9                  | 0,45 |
| polypeptide N-acetylgalactosaminyltransferase 1                                                 | GALNT1                 | 0,45 |
| DENN/MADD domain containing 5B                                                                  | DENND5B                | 0,45 |
| mitogen-activated protein kinase kinase 5                                                       | MAP2K5                 | 0,45 |
| LDL receptor related protein associated protein 1                                               | LRPAP1                 | 0,45 |
| aldehyde dehydrogenase 4 family, member A1                                                      | ALDH4A1                | 0,45 |
| acidic nuclear phosphoprotein 32 family member E                                                | ANP32E                 | 0,45 |
| StAR-related lipid transfer domain containing 13                                                | STARD13                | 0,45 |
| nephronophthisis 4                                                                              | NPHP4                  | 0,45 |
| coxsackie virus and adenovirus receptor                                                         | CXADR                  | 0,45 |
| hypoxia up-regulated 1                                                                          | HYOU1                  | 0,45 |
| laminin, beta 2 (laminin S)                                                                     | LAMB2                  | 0,45 |
| Transcript Identified by AceView, Entrez Gene ID(s) 23126                                       | POGZ                   | 0,45 |
| vav 2 guanine nucleotide exchange factor                                                        | VAV2                   | 0,45 |
| mannosyl (alpha-1,6-)-glycoprotein beta-1,2-N-acetylglucosaminyltransferase                     | MGAT2                  | 0,45 |
| ankyrin 2, neuronal                                                                             | ANK2                   | 0,45 |
| ATP binding cassette subfamily D member 4                                                       | ABCD4                  | 0,45 |
| akirin 1                                                                                        | AKIRIN1                | 0,45 |
| CTD small phosphatase 2                                                                         | CTDSP2                 | 0,45 |
| thioredoxin domain containing 11                                                                | TXNDC11                | 0,45 |
| zinc finger protein, X-linked                                                                   | ZFX                    | 0,45 |
| ATPase, Na <sup>+</sup> /K <sup>+</sup> transporting, beta 1 polypeptide                        | ATP1B1                 | 0,45 |
| C1q and tumor necrosis factor related protein 6                                                 | C1QTNF6                | 0,45 |
| Transcript Identified by AceView, Entrez Gene ID(s) 10926                                       | DBF4                   | 0,45 |
| protein kinase domain containing, cytoplasmic                                                   | PKDCC                  | 0,45 |
| ADP-ribosylation factor like GTPase 1                                                           | ARL1                   | 0,45 |
| UDP-Gal:betaGlcNAc beta 1,4- galactosyltransferase, polypeptide 2                               | B4GALT2                | 0,45 |
| mitochondrial ribosomal protein L48                                                             | MRPL48                 | 0,45 |
| Memczak2013 ALT_ACCEPTOR, ALT_DONOR, coding, INTERNAL, intronic best transcript NM_002015       | FOXO1                  | 0,45 |
| integral membrane protein 2B                                                                    | ITM2B                  | 0,45 |
| RPARP antisense RNA 1                                                                           | RPARP-AS1              | 0,45 |

|                                                                                         |                        |      |
|-----------------------------------------------------------------------------------------|------------------------|------|
| G-protein signaling modulator 2                                                         | GPSM2                  | 0,45 |
| hypoxia up-regulated 1                                                                  | HYOU1                  | 0,45 |
| zinc finger homeobox 3                                                                  | ZFHX3                  | 0,44 |
| PDZ domain containing 1                                                                 | PDZK1                  | 0,44 |
| peptidylprolyl isomerase C (cyclophilin C)                                              | PPIC                   | 0,44 |
| zinc fingers and homeoboxes 2                                                           | ZHX2                   | 0,44 |
| DDB1 and CUL4 associated factor 12                                                      | DCAF12                 | 0,44 |
| ankyrin repeat domain 16                                                                | ANKRD16                | 0,44 |
| COBW domain containing 6; COBW domain containing 5;<br>COBW domain containing 7         | CBWD6; CBWD5;<br>CBWD7 | 0,44 |
| solute carrier family 22, member 23                                                     | SLC22A23               | 0,44 |
| leucine zipper-EF-hand containing transmembrane<br>protein 1                            | LETM1                  | 0,44 |
| acetyl-CoA carboxylase beta                                                             | ACACB                  | 0,44 |
| RWD domain containing 2A                                                                | RWDD2A                 | 0,44 |
| ubiquitin specific peptidase 7 (herpes virus-associated)                                | USP7                   | 0,44 |
| ribosomal protein L7a                                                                   | RPL7A                  | 0,44 |
| CMT1A duplicated region transcript 1                                                    | CDRT1                  | 0,44 |
| transmembrane protein 198                                                               | TMEM198                | 0,44 |
| WW domain containing transcription regulator 1                                          | WWTR1                  | 0,44 |
| mucin 15, cell surface associated                                                       | MUC15                  | 0,44 |
| EH domain containing 3                                                                  | EHD3                   | 0,44 |
| chemokine (C-C motif) ligand 16                                                         | CCL16                  | 0,44 |
| CCR4-NOT transcription complex subunit 11                                               | CNOT11                 | 0,44 |
| tRNA 5-methylaminomethyl-2-thiouridylate<br>methyltransferase                           | TRMU                   | 0,44 |
| spire-type actin nucleation factor 2                                                    | SPIRE2                 | 0,44 |
| kelch domain containing 10                                                              | KLHDC10                | 0,44 |
| zinc finger and BTB domain containing 5                                                 | ZBTB5                  | 0,44 |
| dihydropyrimidinase-like 2                                                              | DPYSL2                 | 0,44 |
| serpin peptidase inhibitor, clade A (alpha-1<br>antiproteinase, antitrypsin), member 12 | SERPINA12              | 0,44 |
| apolipoprotein H (beta-2-glycoprotein I)                                                | APOH                   | 0,44 |
| testis expressed 264                                                                    | TEX264                 | 0,44 |
| B-cell CLL/lymphoma 6                                                                   | BCL6                   | 0,44 |
| cathepsin C                                                                             | CTSC                   | 0,44 |
| solute carrier family 2 (facilitated glucose transporter),<br>member 9                  | SLC2A9                 | 0,44 |
| arginine vasopressin-induced 1                                                          | AVPI1                  | 0,44 |
| v-rel avian reticuloendotheliosis viral oncogene homolog                                | REL                    | 0,44 |
| PDS5 cohesin associated factor B                                                        | PDS5B                  | 0,44 |
| centrin 3                                                                               | CETN3                  | 0,44 |
| tweety family member 1                                                                  | TTYH1                  | 0,44 |
| histone deacetylase 6                                                                   | HDAC6                  | 0,44 |

|                                                                                                                                                                                      |               |      |
|--------------------------------------------------------------------------------------------------------------------------------------------------------------------------------------|---------------|------|
| abhydrolase domain containing 18                                                                                                                                                     | ABHD18        | 0,44 |
| mannosyl-oligosaccharide glucosidase                                                                                                                                                 | MOGS          | 0,44 |
| grancalcin, EF-hand calcium binding protein                                                                                                                                          | GCA           | 0,44 |
| unkempt family zinc finger                                                                                                                                                           | UNK           | 0,44 |
| thyrotrophic embryonic factor                                                                                                                                                        | TEF           | 0,44 |
| THO complex 6                                                                                                                                                                        | THOC6         | 0,44 |
| aminoacylase 3                                                                                                                                                                       | ACY3          | 0,44 |
| heat shock transcription factor 2 binding protein                                                                                                                                    | HSF2BP        | 0,44 |
| zinc finger protein 660                                                                                                                                                              | ZNF660        | 0,44 |
| Memczak2013 ALT_ACCEPTOR, ALT_DONOR, coding, INTERNAL, intronic best transcript NM_001008895                                                                                         | CUL4A         | 0,44 |
| vacuolar protein sorting 51 homolog (S. cerevisiae)                                                                                                                                  | VPS51         | 0,44 |
| chromosome 19 open reading frame 66                                                                                                                                                  | C19orf66      | 0,44 |
| kinesin family member 18B                                                                                                                                                            | KIF18B        | 0,44 |
| zinc finger protein 514                                                                                                                                                              | ZNF514        | 0,44 |
| myotubularin 1                                                                                                                                                                       | MTM1          | 0,44 |
| UBX domain protein 7                                                                                                                                                                 | UBXN7         | 0,44 |
| forkhead box O4                                                                                                                                                                      | FOXO4         | 0,44 |
| carboxypeptidase Q                                                                                                                                                                   | CPQ           | 0,44 |
| Transcript Identified by AceView, Entrez Gene ID(s) 27332                                                                                                                            | ZNF638        | 0,44 |
| Memczak2013 ANTISENSE, CDS, coding, downstream_end, upstream_start, UTR3, UTR5 best transcript NM_004065; CDR1 antisense RNA; CDR1 antisense RNA [Source:HGNC Symbol;Acc:HGNC:48926] | CDR1; CDR1-AS | 0,44 |
| serine/arginine-rich splicing factor 4                                                                                                                                               | SRSF4         | 0,44 |
| arylsulfatase E (chondrodysplasia punctata 1)                                                                                                                                        | ARSE          | 0,44 |
| carnitine palmitoyltransferase 2                                                                                                                                                     | CPT2          | 0,44 |
| cytoskeleton associated protein 2                                                                                                                                                    | CKAP2         | 0,43 |
| inositol-3-phosphate synthase 1                                                                                                                                                      | ISYNA1        | 0,43 |
| fibronectin type III domain containing 3B                                                                                                                                            | FNDC3B        | 0,43 |
| SEC63 homolog, protein translocation regulator                                                                                                                                       | SEC63         | 0,43 |
| acyl-CoA oxidase 1, palmitoyl                                                                                                                                                        | ACOX1         | 0,43 |
| carnosine N-methyltransferase 1                                                                                                                                                      | CARNMT1       | 0,43 |
| transmembrane protease, serine 2                                                                                                                                                     | TMPRSS2       | 0,43 |
| pleckstrin homology domain containing, family A (phosphoinositide binding specific) member 2                                                                                         | PLEKHA2       | 0,43 |
| YEATS domain containing 4                                                                                                                                                            | YEATS4        | 0,43 |
| caspase 8 associated protein 2                                                                                                                                                       | CASP8AP2      | 0,43 |
| ATPase family, AAA domain containing 2                                                                                                                                               | ATAD2         | 0,43 |
| dual specificity phosphatase 6                                                                                                                                                       | DUSP6         | 0,43 |
| transmembrane protein 263                                                                                                                                                            | TMEM263       | 0,43 |
| cytochrome P450, family 4, subfamily F, polypeptide 12                                                                                                                               | CYP4F12       | 0,43 |
| contactin associated protein-like 3B                                                                                                                                                 | CNTNAP3B      | 0,43 |
| thyroid hormone receptor, beta                                                                                                                                                       | THRB          | 0,43 |

|                                                                                                                    |                                                          |      |
|--------------------------------------------------------------------------------------------------------------------|----------------------------------------------------------|------|
| solute carrier family 43 (amino acid system L transporter), member 1                                               | SLC43A1                                                  | 0,43 |
| replication factor C subunit 1                                                                                     | RFC1                                                     | 0,43 |
| nuclear receptor subfamily 2, group F, member 1                                                                    | NR2F1                                                    | 0,43 |
| anaphase promoting complex subunit 5                                                                               | ANAPC5                                                   | 0,43 |
| solute carrier family 17 (vesicular nucleotide transporter), member 9                                              | SLC17A9                                                  | 0,43 |
| transforming growth factor, beta receptor 1                                                                        | TGFBR1                                                   | 0,43 |
| KIAA1841                                                                                                           | KIAA1841                                                 | 0,43 |
| transmembrane protein 98                                                                                           | TMEM98                                                   | 0,43 |
| Memczak2013 ALT_ACCEPTOR, ALT_DONOR, coding, INTERNAL, intronic best transcript NM_024766                          | CAMKMT                                                   | 0,43 |
| miR-17-92 cluster host gene; microRNA 17; microRNA 18a; microRNA 19a; microRNA 19b-1; microRNA 20a; microRNA 92a-1 | MIR17HG; MIR17; MIR18A; MIR19A; MIR19B1; MIR20A; MIR92A1 | 0,43 |
| family with sequence similarity 58, member A                                                                       | FAM58A                                                   | 0,43 |
| zinc finger protein 318                                                                                            | ZNF318                                                   | 0,43 |
| mitochondrial pyruvate carrier 2                                                                                   | MPC2                                                     | 0,43 |
| choline dehydrogenase                                                                                              | CHDH                                                     | 0,43 |
| solute carrier family 37 (glucose-6-phosphate transporter), member 4 [Source:HGNC Symbol;Acc:HGNC:4061]            | SLC37A4                                                  | 0,43 |
| germ cell-less, spermatogenesis associated 1                                                                       | GMCL1                                                    | 0,43 |
| ADAM metallopeptidase with thrombospondin type 1 motif 6                                                           | ADAMTS6                                                  | 0,43 |
| phosphate cytidylyltransferase 1, choline, beta                                                                    | PCYT1B                                                   | 0,43 |
| acetyl-CoA acyltransferase 1                                                                                       | ACAA1                                                    | 0,43 |
| round spermatid basic protein 1-like                                                                               | RSBN1L                                                   | 0,43 |
| ventral anterior homeobox 2                                                                                        | VAX2                                                     | 0,43 |
| Opa interacting protein 5                                                                                          | OIP5                                                     | 0,43 |
| transmembrane protein 129, E3 ubiquitin protein ligase                                                             | TMEM129                                                  | 0,43 |
| asparaginyl-tRNA synthetase 2, mitochondrial (putative)                                                            | NARS2                                                    | 0,43 |
| nucleoporin 205kDa                                                                                                 | NUP205                                                   | 0,43 |
| plasmolipin                                                                                                        | PLLP                                                     | 0,43 |
| solute carrier family 37 (glucose-6-phosphate transporter), member 4                                               | SLC37A4                                                  | 0,43 |
| cyclin B1                                                                                                          | CCNB1                                                    | 0,43 |
| cellular repressor of E1A-stimulated genes 1                                                                       | CREG1                                                    | 0,43 |
| Hermansky-Pudlak syndrome 4                                                                                        | HPS4                                                     | 0,43 |
| RAB43, member RAS oncogene family                                                                                  | RAB43                                                    | 0,43 |

|                                                                                                        |                        |      |
|--------------------------------------------------------------------------------------------------------|------------------------|------|
| novel transcript; Transcript Identified by AceView, Entrez<br>Gene ID(s) 55737                         | RP11-93O14.2;<br>VPS35 | 0,43 |
| DnaJ (Hsp40) homolog, subfamily C, member 12                                                           | DNAJC12                | 0,43 |
| peroxiredoxin 4                                                                                        | PRDX4                  | 0,43 |
| coiled-coil domain containing 183; RAB, member RAS<br>oncogene family-like 6                           | CCDC183; RABL6         | 0,43 |
| gamma-glutamyl carboxylase                                                                             | GGCX                   | 0,43 |
| single stranded DNA binding protein 4                                                                  | SSBP4                  | 0,43 |
| runt-related transcription factor 1                                                                    | RUNX1                  | 0,43 |
| proline rich Gla (G-carboxyglutamic acid) 4<br>(transmembrane)                                         | PRRG4                  | 0,42 |
| IgA-inducing protein                                                                                   | IGIP                   | 0,42 |
| sorting nexin 4                                                                                        | SNX4                   | 0,42 |
| armadillo repeat containing 5                                                                          | ARMC5                  | 0,42 |
| NLR family, apoptosis inhibitory protein                                                               | NAIP                   | 0,42 |
| multivesicular body subunit 12A; BST2 interferon<br>stimulated positive regulator (non-protein coding) | MVB12A; BISPR          | 0,42 |
| adrenoceptor alpha 2C                                                                                  | ADRA2C                 | 0,42 |
| angel homolog 1 (Drosophila)                                                                           | ANGEL1                 | 0,42 |
| pyroglutamyl-peptidase I                                                                               | PGPEP1                 | 0,42 |
| CNKSR family member 3                                                                                  | CNKSR3                 | 0,42 |
| protein kinase, AMP-activated, beta 2 non-catalytic<br>subunit                                         | PRKAB2                 | 0,42 |
| histone cluster 1, H1e                                                                                 | HIST1H1E               | 0,42 |
| nuclear factor of kappa light polypeptide gene enhancer<br>in B-cells inhibitor, alpha                 | NFKBIA                 | 0,42 |
| phosphodiesterase 3B, cGMP-inhibited                                                                   | PDE3B                  | 0,42 |
| chemokine (C-C motif) receptor 6                                                                       | CCR6                   | 0,42 |
| quinolate phosphoribosyltransferase                                                                    | QPRT                   | 0,42 |
| carbohydrate (N-acetylgalactosamine 4-O)<br>sulfotransferase 9                                         | CHST9                  | 0,42 |
| cAMP responsive element binding protein 3-like 2                                                       | CREB3L2                | 0,42 |
| ATPase, Ca++ transporting, plasma membrane 2                                                           | ATP2B2                 | 0,42 |
| chromosome 21 open reading frame 33                                                                    | C21orf33               | 0,42 |
| adenosine monophosphate deaminase 2                                                                    | AMPD2                  | 0,42 |
| phytanoyl-CoA 2-hydroxylase interacting protein-like                                                   | PHYHIPL                | 0,42 |
| centriole, cilia and spindle-associated protein                                                        | CCSAP                  | 0,42 |
| twinfilin actin binding protein 2                                                                      | TWF2                   | 0,42 |
| secreted and transmembrane 1                                                                           | SECTM1                 | 0,42 |
| pantothenate kinase 3                                                                                  | PANK3                  | 0,42 |
| ST3 beta-galactoside alpha-2,3-sialyltransferase 6                                                     | ST3GAL6                | 0,42 |
| interleukin 6 signal transducer                                                                        | IL6ST                  | 0,42 |
| apolipoprotein A-V                                                                                     | APOA5                  | 0,42 |
| leucine-rich repeat containing G protein-coupled receptor<br>4                                         | LGR4                   | 0,42 |

|                                                                                                          |                                |      |
|----------------------------------------------------------------------------------------------------------|--------------------------------|------|
| Transcript Identified by AceView, Entrez Gene ID(s) 58155                                                | PTBP2                          | 0,42 |
| kelch domain containing 3                                                                                | KLHDC3                         | 0,42 |
| uroplakin 3A                                                                                             | UPK3A                          | 0,42 |
| synaptojanin 2                                                                                           | SYNJ2                          | 0,42 |
| mannosidase, endo-alpha                                                                                  | MANEA                          | 0,42 |
| MCF.2 cell line derived transforming sequence like                                                       | MCF2L                          | 0,42 |
| mitogen-activated protein kinase kinase kinase 8                                                         | MAP3K8                         | 0,42 |
| NIMA-related kinase 6                                                                                    | NEK6                           | 0,42 |
| SFT2 domain containing 3                                                                                 | SFT2D3                         | 0,42 |
| protein C (inactivator of coagulation factors Va and VIIIa)                                              | PROC                           | 0,42 |
| kinesin family member C1                                                                                 | KIFC1                          | 0,42 |
| ribosomal protein L27a; small nucleolar RNA, H/ACA box 3A; small nucleolar RNA, H/ACA box 3B             | RPL27A;<br>SNORA3A;<br>SNORA3B | 0,42 |
| dehydrogenase/reductase (SDR family) member 11                                                           | DHRS11                         | 0,42 |
| SRY box 12                                                                                               | SOX12                          | 0,42 |
| topoisomerase (DNA) II beta; microRNA 4442                                                               | TOP2B; MIR4442                 | 0,42 |
| pituitary tumor-transforming 2                                                                           | PTTG2                          | 0,42 |
| tRNA 5-methylaminomethyl-2-thiouridylate methyltransferase                                               | TRMU                           | 0,42 |
| TRPM8 channel-associated factor 1                                                                        | TCAF1                          | 0,42 |
| LSM11, U7 small nuclear RNA associated                                                                   | LSM11                          | 0,42 |
| leucine rich repeat containing 75B                                                                       | LRRC75B                        | 0,41 |
| tight junction protein 3                                                                                 | TJP3                           | 0,41 |
| histone cluster 1, H4k                                                                                   | HIST1H4K                       | 0,41 |
| WD repeat and FYVE domain containing 2                                                                   | WDFY2                          | 0,41 |
| TMED7-TICAM2 readthrough; toll-like receptor adaptor molecule 2; transmembrane p24 trafficking protein 7 | TMED7-TICAM2;<br>TICAM2; TMED7 | 0,41 |
| histone cluster 1, H2bg                                                                                  | HIST1H2BG                      | 0,41 |
| mannosyl (alpha-1,6-)-glycoprotein beta-1,6-N-acetylglucosaminyltransferase                              | MGAT5                          | 0,41 |
| isocitrate dehydrogenase 2 (NADP+), mitochondrial                                                        | IDH2                           | 0,41 |
| inhibin beta E                                                                                           | INHBE                          | 0,41 |
| calmodulin regulated spectrin-associated protein family, member 3                                        | CAMSAP3                        | 0,41 |
| sex comb on midleg homolog 1 (Drosophila)                                                                | SCMH1                          | 0,41 |
| StAR-related lipid transfer domain containing 10                                                         | STARD10                        | 0,41 |
| transmembrane protein 216                                                                                | TMEM216                        | 0,41 |
| Rho guanine nucleotide exchange factor (GEF) 40                                                          | ARHGEF40                       | 0,41 |
| PHD finger protein 8                                                                                     | PHF8                           | 0,41 |
| N-acyl ethanolamine acid amidase                                                                         | NAAA                           | 0,41 |
| chromosome 1 open reading frame 233                                                                      | C1orf233                       | 0,41 |
| phosphoserine phosphatase                                                                                | PSPH                           | 0,41 |

|                                                                                                 |                     |      |
|-------------------------------------------------------------------------------------------------|---------------------|------|
| receptor accessory protein 6                                                                    | REEP6               | 0,41 |
| electron-transfer-flavoprotein, beta polypeptide                                                | ETFB                | 0,41 |
| H2A histone family, member X                                                                    | H2AFX               | 0,41 |
| family with sequence similarity 19 (chemokine (C-C motif)-like), member A4                      | FAM19A4             | 0,41 |
| growth arrest-specific 2 like 3                                                                 | GAS2L3              | 0,41 |
| retinol binding protein 4, plasma                                                               | RBP4                | 0,41 |
| calcium channel flower domain containing 1                                                      | CACFD1              | 0,41 |
| glycine cleavage system protein H (aminomethyl carrier)                                         | GCSH                | 0,41 |
| minichromosome maintenance complex component 6                                                  | MCM6                | 0,41 |
| tetratricopeptide repeat domain 39C                                                             | TTC39C              | 0,41 |
| solute carrier family 25 (mitochondrial carrier; ornithine transporter) member 15; microRNA 621 | SLC25A15;<br>MIR621 | 0,41 |
| hypoxia up-regulated 1                                                                          | HYOU1               | 0,41 |
| FYVE, RhoGEF and PH domain containing 4                                                         | FGD4                | 0,41 |
| solute carrier family 18, subfamily B, member 1                                                 | SLC18B1             | 0,41 |
| eukaryotic translation elongation factor 1 beta 2; small nucleolar RNA, H/ACA box 41            | EEF1B2;<br>SNORA41  | 0,41 |
| fumarate hydratase                                                                              | FH                  | 0,41 |
| sestrin 1                                                                                       | SESN1               | 0,41 |
| ring finger protein 122                                                                         | RNF122              | 0,41 |
| cell division cycle 25A                                                                         | CDC25A              | 0,41 |
| surfeit 4                                                                                       | SURF4               | 0,41 |
| pyruvate dehydrogenase kinase, isozyme 3                                                        | PDK3                | 0,41 |
| DnaJ (Hsp40) homolog, subfamily C, member 19                                                    | DNAJC19             | 0,41 |
| mitochondrial ribosomal protein L14                                                             | MRPL14              | 0,41 |
| Rab interacting lysosomal protein-like 2                                                        | RILPL2              | 0,41 |
| solute carrier family 35 (UDP-GlcA/UDP-GalNAc transporter), member D1                           | SLC35D1             | 0,41 |
| NEDD4 binding protein 2-like 1                                                                  | N4BP2L1             | 0,41 |
| mannosidase, alpha, class 1A, member 1                                                          | MAN1A1              | 0,41 |
| ADP-ribosylation factor like GTPase 5A                                                          | ARL5A               | 0,41 |
| transcription factor Dp-2 (E2F dimerization partner 2)                                          | TFDP2               | 0,41 |
| amylo-alpha-1, 6-glucosidase, 4-alpha-glucanotransferase                                        | AGL                 | 0,41 |
| endoplasmic reticulum lectin 1                                                                  | ERLEC1              | 0,41 |
| TBC1 domain family, member 16                                                                   | TBC1D16             | 0,41 |
| absent in melanoma 1                                                                            | AIM1                | 0,41 |
| zinc finger protein 652                                                                         | ZNF652              | 0,41 |
| prolylcarboxypeptidase                                                                          | PRCP                | 0,41 |
| histone cluster 1, H2bf                                                                         | HIST1H2BF           | 0,41 |
| solute carrier family 6 (neurotransmitter transporter), member 8                                | SLC6A8              | 0,41 |
| methylsterol monooxygenase 1                                                                    | MSMO1               | 0,41 |



|                                                             |          |      |
|-------------------------------------------------------------|----------|------|
| insulin like growth factor binding protein 1                | IGFBP1   | 0,41 |
| zinc finger protein 740                                     | ZNF740   | 0,41 |
| FAM3C pseudogene                                            | FAM3C2   | 0,41 |
| myotubularin related protein 4                              | MTMR4    | 0,41 |
| F-box protein 5                                             | FBXO5    | 0,41 |
| cyclin-dependent kinase 6                                   | CDK6     | 0,41 |
| tripartite motif containing 16                              | TRIM16   | 0,41 |
| matrix metalloproteinase 15 (membrane-inserted)             | MMP15    | 0,41 |
| BRCA1 interacting protein C-terminal helicase 1             | BRIP1    | 0,40 |
| forkhead box N3                                             | FOXN3    | 0,40 |
| rotekin 2                                                   | RTKN2    | 0,40 |
| WW domain containing E3 ubiquitin protein ligase 1          | WWP1     | 0,40 |
| hypoxia up-regulated 1                                      | HYOU1    | 0,40 |
| ORMDL sphingolipid biosynthesis regulator 3                 | ORMDL3   | 0,40 |
| ankyrin repeat and SOCS box containing 9                    | ASB9     | 0,40 |
| ribonuclease T2                                             | RNASET2  | 0,40 |
| glycerophosphodiester phosphodiesterase domain containing 1 | GDPD1    | 0,40 |
| primase, DNA, polypeptide 1 (49kDa)                         | PRIM1    | 0,40 |
| homogentisate 1,2-dioxygenase                               | HGD      | 0,40 |
| chromosome 17 open reading frame 96                         | C17orf96 | 0,40 |
| valyl-tRNA synthetase 2, mitochondrial                      | VAR2     | 0,40 |
| acyl-CoA synthetase medium-chain family member 3            | ACSM3    | 0,40 |
| CKLF-like MARVEL transmembrane domain containing 8          | CMTM8    | 0,40 |
| apoptosis-inducing factor, mitochondrion-associated, 1      | AIFM1    | 0,40 |
| tetratricopeptide repeat domain 32                          | TTC32    | 0,40 |
| phosphodiesterase 3A, cGMP-inhibited                        | PDE3A    | 0,40 |
| USP6 N-terminal like                                        | USP6NL   | 0,40 |
| exostosin-like glycosyltransferase 2                        | EXTL2    | 0,40 |
| cyclin B2                                                   | CCNB2    | 0,40 |
| phosphoglycerate dehydrogenase                              | PHGDH    | 0,40 |
| nucleolar and spindle associated protein 1                  | NUSAP1   | 0,40 |
| metastasis associated 1                                     | MTA1     | 0,40 |
| procollagen-lysine, 2-oxoglutarate 5-dioxygenase 1          | PLOD1    | 0,40 |
| glutamine--fructose-6-phosphate transaminase 1              | GFPT1    | 0,40 |
| cyclin-dependent kinase 19                                  | CDK19    | 0,40 |
| nuclear receptor subfamily 5, group A, member 2             | NR5A2    | 0,40 |
| centromere protein V                                        | CENPV    | 0,40 |
| jade family PHD finger 1                                    | JADE1    | 0,40 |
| TBC1 domain family, member 8B (with GRAM domain)            | TBC1D8B  | 0,40 |
| spastic paraplegia 20 (Troyer syndrome)                     | SPG20    | 0,40 |
| monoacylglycerol O-acyltransferase 2                        | MOGAT2   | 0,40 |
| ADP-ribosylation factor like GTPase 3                       | ARL3     | 0,40 |
| leucine rich repeat containing 8 family, member D           | LRRC8D   | 0,40 |
| ectonucleoside triphosphate diphosphohydrolase 5            | ENTPD5   | 0,40 |

|                                                                                                                                  |                       |      |
|----------------------------------------------------------------------------------------------------------------------------------|-----------------------|------|
| phosphofructokinase, liver                                                                                                       | PFKL                  | 0,40 |
| cyclin-dependent kinase inhibitor 1B (p27, Kip1)                                                                                 | CDKN1B                | 0,40 |
| zinc finger, DHHC-type containing 17                                                                                             | ZDHHC17               | 0,40 |
| chromosome 8 open reading frame 37                                                                                               | C8orf37               | 0,40 |
| family with sequence similarity 117, member B                                                                                    | FAM117B               | 0,40 |
| monoacylglycerol O-acyltransferase 1                                                                                             | MOGAT1                | 0,40 |
| mutS homolog 6                                                                                                                   | MSH6                  | 0,40 |
| ELMO/CED-12 domain containing 2                                                                                                  | ELMOD2                | 0,39 |
| hypoxia up-regulated 1                                                                                                           | HYOU1                 | 0,39 |
| transmembrane protein 181                                                                                                        | TMEM181               | 0,39 |
| KDEL (Lys-Asp-Glu-Leu) endoplasmic reticulum protein retention receptor 2                                                        | KDEL2                 | 0,39 |
| spalt-like transcription factor 2                                                                                                | SALL2                 | 0,39 |
| ubiquitin specific peptidase 2                                                                                                   | USP2                  | 0,39 |
| solute carrier family 38, member 5                                                                                               | SLC38A5               | 0,39 |
| 5-nucleotidase domain containing 2                                                                                               | NT5DC2                | 0,39 |
| Jeck2013 ALT_ACCEPTOR, ALT_DONOR, coding, INTERNAL, intronic best transcript NM_000314; novel transcript, sense intronic to PTEN | RP11-380G5.2;<br>PTEN | 0,39 |
| galactose mutarotase (aldose 1-epimerase)                                                                                        | GALM                  | 0,39 |
| hypoxia up-regulated 1                                                                                                           | HYOU1                 | 0,39 |
| cell growth regulator with EF-hand domain 1                                                                                      | CGREF1                | 0,39 |
| cyclin A2                                                                                                                        | CCNA2                 | 0,39 |
| glycine cleavage system protein H (aminomethyl carrier)                                                                          | GCSH                  | 0,39 |
| transmembrane protein 86B                                                                                                        | TMEM86B               | 0,39 |
|                                                                                                                                  | LRIG1                 | 0,39 |
| nucleobindin 2                                                                                                                   | NUCB2                 | 0,39 |
| cytochrome P450, family 19, subfamily A, polypeptide 1                                                                           | CYP19A1               | 0,39 |
| XIAP associated factor 1                                                                                                         | XAF1                  | 0,39 |
| cyclin-dependent kinase inhibitor 3                                                                                              | CDKN3                 | 0,39 |
| stress-associated endoplasmic reticulum protein 1                                                                                | SERP1                 | 0,39 |
| leucine zipper, putative tumor suppressor 2                                                                                      | LZTS2                 | 0,39 |
| adhesion G protein-coupled receptor G6                                                                                           | ADGRG6                | 0,39 |
| mitogen-activated protein kinase kinase kinase 1, E3 ubiquitin protein ligase                                                    | MAP3K1                | 0,39 |
| coproporphyrinogen oxidase                                                                                                       | CPOX                  | 0,39 |
| ER membrane protein complex subunit 9                                                                                            | EMC9                  | 0,39 |
| adhesion G protein-coupled receptor A3                                                                                           | ADGRA3                | 0,39 |
| calcium regulated heat stable protein 1                                                                                          | CARHSP1               | 0,39 |
| hydroxysteroid (17-beta) dehydrogenase 12                                                                                        | HSD17B12              | 0,39 |
| acyl-CoA synthetase medium-chain family member 2A                                                                                | ACSM2A                | 0,39 |
| mesoderm specific transcript                                                                                                     | MEST                  | 0,39 |
| proteasome activator subunit 2; microRNA 7703                                                                                    | PSME2; MIR7703        | 0,39 |
| pantothenate kinase 2                                                                                                            | PANK2                 | 0,39 |

|                                                                                        |          |      |
|----------------------------------------------------------------------------------------|----------|------|
| ubiquitin domain containing 2                                                          | UBTD2    | 0,39 |
| zinc finger protein 792                                                                | ZNF792   | 0,39 |
| G protein-coupled receptor 157                                                         | GPR157   | 0,39 |
| hypoxia up-regulated 1                                                                 | HYOU1    | 0,39 |
| sortilin 1                                                                             | SORT1    | 0,39 |
| phosphatidylcholine transfer protein                                                   | PCTP     | 0,39 |
| chondroitin polymerizing factor                                                        | CHPF     | 0,39 |
| glycerol kinase                                                                        | GK       | 0,39 |
| lectin, galactoside-binding, soluble, 2                                                | LGALS2   | 0,39 |
| Jeck2013 ALT_ACCEPTOR, ALT_DONOR, coding, INTERNAL, intronic best transcript NM_005766 | FARP1    | 0,39 |
| coiled-coil domain containing 138                                                      | CCDC138  | 0,39 |
| hypoxia up-regulated 1                                                                 | HYOU1    | 0,39 |
| zinc finger CCH-type, antiviral 1-like                                                 | ZC3HAV1L | 0,39 |
| DIS3 like exosome 3-5 exoribonuclease                                                  | DIS3L    | 0,39 |
| mitochondrial ribosomal protein L16                                                    | MRPL16   | 0,38 |
| NudC domain containing 2                                                               | NUDCD2   | 0,38 |
| ribosomal modification protein rimK-like family member A                               | RIMKLA   | 0,38 |
| glutathione S-transferase alpha 4                                                      | GSTA4    | 0,38 |
| ADP-ribosylation factor like GTPase 4D                                                 | ARL4D    | 0,38 |
| NHL repeat containing 3                                                                | NHLRC3   | 0,38 |
| homeobox D4                                                                            | HOXD4    | 0,38 |
| Janus kinase 3                                                                         | JAK3     | 0,38 |
| transient receptor potential cation channel, subfamily V, member 4                     | TRPV4    | 0,38 |
| serpin peptidase inhibitor, clade G (C1 inhibitor), member 1                           | SERPING1 | 0,38 |
| solute carrier family 44 (choline transporter), member 1                               | SLC44A1  | 0,38 |
| Yip1 interacting factor homolog A (S. cerevisiae)                                      | YIF1A    | 0,38 |
| SEC24 homolog D, COPII coat complex component                                          | SEC24D   | 0,38 |
| natural killer cell cytotoxicity receptor 3 ligand 1                                   | NCR3LG1  | 0,38 |
| ankyrin repeat and SOCS box containing 13                                              | ASB13    | 0,38 |
| splicing factor 3b, subunit 1, 155kDa                                                  | SF3B1    | 0,38 |
| family with sequence similarity 136, member A                                          | FAM136A  | 0,38 |
| cytochrome P450, family 3, subfamily A, polypeptide 43                                 | CYP3A43  | 0,38 |
| proline/serine-rich coiled-coil 1                                                      | PSRC1    | 0,38 |
| mannosidase, alpha, class 1B, member 1                                                 | MAN1B1   | 0,38 |
| CAS1 domain containing 1                                                               | CASD1    | 0,38 |
| zinc finger protein 346                                                                | ZNF346   | 0,38 |
| zinc finger protein 358                                                                | ZNF358   | 0,38 |
| proteasome 26S subunit, non-ATPase 10                                                  | PSMD10   | 0,38 |
| hyaluronoglucosaminidase 1                                                             | HYAL1    | 0,38 |
| calcineurin binding protein 1                                                          | CABIN1   | 0,38 |
| tetratricopeptide repeat domain 6                                                      | TTC6     | 0,38 |

|                                                                                                                  |                      |      |
|------------------------------------------------------------------------------------------------------------------|----------------------|------|
| polo-like kinase 1                                                                                               | PLK1                 | 0,38 |
| family with sequence similarity 13, member A                                                                     | FAM13A               | 0,38 |
| transmembrane protein 143                                                                                        | TMEM143              | 0,38 |
| thioredoxin domain containing 5 (endoplasmic reticulum)                                                          | TXNDC5               | 0,38 |
| basic, immunoglobulin-like variable motif containing                                                             | BIVM                 | 0,38 |
| hydroxysteroid dehydrogenase like 2                                                                              | HSDL2                | 0,37 |
| Sec61 translocon beta subunit                                                                                    | SEC61B               | 0,37 |
| sideroflexin 2                                                                                                   | SFXN2                | 0,37 |
| family with sequence similarity 35, member A                                                                     | FAM35A               | 0,37 |
| NAD(P) dependent steroid dehydrogenase-like                                                                      | NSDHL                | 0,37 |
| protein phosphatase 6, regulatory subunit 2                                                                      | PPP6R2               | 0,37 |
| chromobox homolog 4                                                                                              | CBX4                 | 0,37 |
| histone cluster 2, H2ab                                                                                          | HIST2H2AB            | 0,37 |
| KIAA0101; casein kinase 1, gamma 1                                                                               | KIAA0101;<br>CSNK1G1 | 0,37 |
| protein phosphatase 4, regulatory subunit 2                                                                      | PPP4R2               | 0,37 |
| LDL receptor related protein 4                                                                                   | LRP4                 | 0,37 |
| phospholipase D1, phosphatidylcholine-specific                                                                   | PLD1                 | 0,37 |
| LDL receptor related protein 6                                                                                   | LRP6                 | 0,37 |
| epilepsy, progressive myoclonus type 2A, Lafora disease (laforin)                                                | EPM2A                | 0,37 |
| pleckstrin homology domain containing, family G (with RhoGef domain) member 6                                    | PLEKHG6              | 0,37 |
| maestro heat-like repeat family member 8                                                                         | MROH8                | 0,37 |
| integrator complex subunit 10                                                                                    | INTS10               | 0,37 |
| sema domain, immunoglobulin domain (Ig), transmembrane domain (TM) and short cytoplasmic domain, (semaphorin) 4C | SEMA4C               | 0,37 |
| FK506 binding protein 7                                                                                          | FKBP7                | 0,37 |
| FERM domain containing 3                                                                                         | FRMD3                | 0,37 |
| F-box protein 17                                                                                                 | FBXO17               | 0,37 |
| centromere protein F                                                                                             | CENPF                | 0,37 |
| histone cluster 1, H2ag                                                                                          | HIST1H2AG            | 0,37 |
| sepiapterin reductase (7,8-dihydrobiopterin:NADP+ oxidoreductase)                                                | SPR                  | 0,37 |
| calmegin                                                                                                         | CLGN                 | 0,37 |
| dicer 1, ribonuclease type III                                                                                   | DICER1               | 0,37 |
| component of oligomeric golgi complex 6                                                                          | COG6                 | 0,37 |
| solute carrier family 25, member 43                                                                              | SLC25A43             | 0,37 |
| mitochondrial amidoxime reducing component 2                                                                     | MARC2                | 0,37 |
| platelet-derived growth factor receptor, beta polypeptide                                                        | PDGFRB               | 0,37 |
| noncompact myelin associated protein                                                                             | NCMAP                | 0,37 |
| signal peptide peptidase like 2B                                                                                 | SPPL2B               | 0,37 |

|                                                                                   |                         |      |
|-----------------------------------------------------------------------------------|-------------------------|------|
| cytochrome P450, family 4, subfamily V, polypeptide 2                             | CYP4V2                  | 0,37 |
| follistatin                                                                       | FST                     | 0,37 |
| Pim-2 proto-oncogene, serine/threonine kinase                                     | PIM2                    | 0,37 |
| tetraspanin 33                                                                    | TSPAN33                 | 0,37 |
| UPF1 regulator of nonsense transcripts homolog (yeast)                            | UPF1                    | 0,37 |
| E2F transcription factor 5, p130-binding                                          | E2F5                    | 0,37 |
| DENN/MADD domain containing 1B                                                    | DENND1B                 | 0,37 |
| ankyrin repeat and sterile alpha motif domain containing 4B                       | ANKS4B                  | 0,37 |
| polypeptide N-acetylgalactosaminyltransferase 13                                  | GALNT13                 | 0,37 |
| carbohydrate (N-acetylgalactosamine 4-sulfate 6-O) sulfotransferase 15            | CHST15                  | 0,37 |
| carbonic anhydrase XIII                                                           | CA13                    | 0,37 |
| Cbp/p300-interacting transactivator, with Glu/Asp rich carboxy-terminal domain, 2 | CITED2                  | 0,37 |
| hCG2028352-like; novel transcript                                                 | LOC729970; RP4-639F20.1 | 0,37 |
| transmembrane protein 243, mitochondrial                                          | TMEM243                 | 0,37 |
| cystathionine-beta-synthase                                                       | CBS                     | 0,37 |
| NHS-like 1                                                                        | NHSL1                   | 0,37 |
| triple QxxK/R motif containing                                                    | TRIQQ                   | 0,37 |
| gelsolin                                                                          | GSN                     | 0,37 |
| minichromosome maintenance complex component 3                                    | MCM3                    | 0,37 |
| tetratricopeptide repeat domain 3                                                 | TTC3                    | 0,37 |
| Werner helicase interacting protein 1                                             | WRNIP1                  | 0,37 |
| ankyrin repeat domain 46                                                          | ANKRD46                 | 0,37 |
| succinate dehydrogenase complex assembly factor 3                                 | SDHAF3                  | 0,36 |
| immunoglobulin superfamily, member 23                                             | IGSF23                  | 0,36 |
| neuronal guanine nucleotide exchange factor                                       | NGEF                    | 0,36 |
| acyl-CoA synthetase short-chain family member 3                                   | ACSS3                   | 0,36 |
| TNF receptor-associated factor 4                                                  | TRAF4                   | 0,36 |
| glutamate-ammonia ligase                                                          | GLUL                    | 0,36 |
| mannosidase, alpha, class 2A, member 1                                            | MAN2A1                  | 0,36 |
| interleukin 27 receptor, alpha                                                    | IL27RA                  | 0,36 |
| high mobility group nucleosomal binding domain 3                                  | HMG3                    | 0,36 |
| kelch domain containing 2                                                         | KLHDC2                  | 0,36 |
| ALG14, UDP-N-acetylglucosaminyltransferase subunit                                | ALG14                   | 0,36 |
| diacylglycerol O-acyltransferase 1; microRNA 6848                                 | DGAT1; MIR6848          | 0,36 |
| GTF2I repeat domain containing 2; GTF2I repeat domain containing 2B               | GTF2IRD2; GTF2IRD2B     | 0,36 |
| transmembrane p24 trafficking protein 9                                           | TMED9                   | 0,36 |
| histone cluster 1, H3f                                                            | HIST1H3F                | 0,36 |
| fat storage-inducing transmembrane protein 1                                      | FITM1                   | 0,36 |
| hexokinase 2                                                                      | HK2                     | 0,36 |

|                                                                                                           |                                 |      |
|-----------------------------------------------------------------------------------------------------------|---------------------------------|------|
| serpin peptidase inhibitor, clade A (alpha-1 antiproteinase, antitrypsin), member 1                       | SERPINA1                        | 0,36 |
| zinc finger protein 275                                                                                   | ZNF275                          | 0,36 |
| Rho guanine nucleotide exchange factor 10 like                                                            | ARHGEF10L                       | 0,36 |
| serine palmitoyltransferase, long chain base subunit 3                                                    | SPTLC3                          | 0,36 |
| solute carrier family 38, member 3                                                                        | SLC38A3                         | 0,36 |
| mitochondrial fission regulator 1-like                                                                    | MTFR1L                          | 0,36 |
| DEP domain containing 7                                                                                   | DEPDC7                          | 0,36 |
| cysteine dioxygenase type 1                                                                               | CDO1                            | 0,36 |
| histone cluster 1, H3b                                                                                    | HIST1H3B                        | 0,36 |
| DnaJ (Hsp40) homolog, subfamily C, member 3                                                               | DNAJC3                          | 0,36 |
| yippee like 3                                                                                             | YPEL3                           | 0,36 |
| family with sequence similarity 19 (chemokine (C-C motif)-like), member A5                                | FAM19A5                         | 0,36 |
| solute carrier family 25 (mitochondrial carrier; phosphate carrier), member 23                            | SLC25A23                        | 0,36 |
| small nucleolar RNA, H/ACA box 17A; small nucleolar RNA, H/ACA box 17B; small nucleolar RNA host gene 7   | SNORA17A;<br>SNORA17B;<br>SNHG7 | 0,36 |
| methionine adenosyltransferase I, alpha                                                                   | MAT1A                           | 0,36 |
| tripartite motif containing 71, E3 ubiquitin protein ligase                                               | TRIM71                          | 0,36 |
| Jeck2013 ALT_ACCEPTOR, ALT_DONOR, coding, INTERNAL, intronic, OVERLAPTX, OVEXON best transcript NM_000942 | PPIB                            | 0,36 |
| histamine N-methyltransferase                                                                             | HNMT                            | 0,36 |
| DEAH (Asp-Glu-Ala-His) box polypeptide 33                                                                 | DHX33                           | 0,36 |
| nuclear factor of activated T-cells, cytoplasmic, calcineurin-dependent 2                                 | NFATC2                          | 0,36 |
| ethanolamine kinase 1                                                                                     | ETNK1                           | 0,36 |
| mercaptopyruvate sulfurtransferase                                                                        | MPST                            | 0,36 |
| lin-7 homolog A (C. elegans)                                                                              | LIN7A                           | 0,36 |
| progesterone receptor membrane component 2                                                                | PGRMC2                          | 0,36 |
| ATPase, class VI, type 11A                                                                                | ATP11A                          | 0,36 |
| Transcript Identified by AceView, Entrez Gene ID(s) 8395                                                  | PIP5K1B                         | 0,36 |
| cyclin B1 interacting protein 1, E3 ubiquitin protein ligase; small nucleolar RNA, C/D box 126            | CCNB1IP1;<br>SNORD126           | 0,36 |
| COX11 cytochrome c oxidase copper chaperone                                                               | COX11                           | 0,36 |
| dolichyldiphosphatase 1                                                                                   | DOLPP1                          | 0,36 |
| family with sequence similarity 156, member A                                                             | FAM156A                         | 0,36 |
| ectodermal-neural cortex 1 (with BTB domain)                                                              | ENC1                            | 0,36 |
| cystathionine-beta-synthase                                                                               | CBS                             | 0,35 |
| nuclear factor of kappa light polypeptide gene enhancer in B-cells 1                                      | NFKB1                           | 0,35 |

|                                                                                                        |                    |      |
|--------------------------------------------------------------------------------------------------------|--------------------|------|
| Sad1 and UNC84 domain containing 2                                                                     | SUN2               | 0,35 |
| ubiquitin-like modifier activating enzyme 7; microRNA 5193                                             | UBA7; MIR5193      | 0,35 |
| SWI/SNF related, matrix associated, actin dependent regulator of chromatin, subfamily a, member 1      | SMARCA1            | 0,35 |
| serpin peptidase inhibitor, clade F (alpha-2 antiplasmin, pigment epithelium derived factor), member 1 | SERPINF1           | 0,35 |
| protein O-glucosyltransferase 1                                                                        | POGLUT1            | 0,35 |
| chromosome 12 open reading frame 57; RNA, U7 small nuclear 1                                           | C12orf57; RNU7-1   | 0,35 |
| cytochrome P450, family 2, subfamily W, polypeptide 1                                                  | CYP2W1             | 0,35 |
| transmembrane protein 39A                                                                              | TMEM39A            | 0,35 |
| high mobility group AT-hook 2                                                                          | HMGA2              | 0,35 |
| regulatory factor X, 5 (influences HLA class II expression)                                            | RFX5               | 0,35 |
| heat-responsive protein 12                                                                             | HRSP12             | 0,35 |
| Transcript Identified by AceView, Entrez Gene ID(s) 2146                                               | EZH2               | 0,35 |
| NGFI-A binding protein 1                                                                               | NAB1               | 0,35 |
| peroxisomal trans-2-enoyl-CoA reductase                                                                | PECR               | 0,35 |
| cyclin-dependent kinase inhibitor 2C (p18, inhibits CDK4)                                              | CDKN2C             | 0,35 |
| prolyl 4-hydroxylase, alpha polypeptide I                                                              | P4HA1              | 0,35 |
| MAGE family member F1                                                                                  | MAGEF1             | 0,35 |
| kazrin, periplakin interacting protein                                                                 | KAZN               | 0,35 |
| TBC1 domain family, member 4                                                                           | TBC1D4             | 0,35 |
| Fc fragment of IgG binding protein                                                                     | FCGBP              | 0,35 |
| inhibitor of DNA binding 1, dominant negative helix-loop-helix protein                                 | ID1                | 0,35 |
| solute carrier family 22, member 31                                                                    | SLC22A31           | 0,35 |
| methyltransferase like 21A                                                                             | METTL21A           | 0,35 |
| LDL receptor related protein 5                                                                         | LRP5               | 0,35 |
| PRELI domain containing 3A                                                                             | PRELID3A           | 0,35 |
| taste receptor, type 2, member 14                                                                      | TAS2R14            | 0,35 |
| hypoxia up-regulated 1                                                                                 | HYOU1              | 0,35 |
| ATPase, Ca++ transporting, plasma membrane 1                                                           | ATP2B1             | 0,35 |
| contactin associated protein-like 3 pseudogene 2; contactin associated protein-like 3                  | CNTNAP3P2; CNTNAP3 | 0,35 |
| golgi integral membrane protein 4                                                                      | GOLIM4             | 0,35 |
| IQ motif and Sec7 domain 1                                                                             | IQSEC1             | 0,35 |
| dopey family member 1                                                                                  | DOPEY1             | 0,35 |
| protogenin                                                                                             | PRTG               | 0,35 |
| 3-phosphoadenosine 5-phosphosulfate synthase 1                                                         | PAPSS1             | 0,35 |
| centromere protein A                                                                                   | CENPA              | 0,35 |
| Rho-related BTB domain containing 1                                                                    | RHOBTB1            | 0,35 |
| myotubularin related protein 12                                                                        | MTMR12             | 0,35 |

|                                                                                                              |                   |      |
|--------------------------------------------------------------------------------------------------------------|-------------------|------|
| chemokine (C-X-C motif) ligand 16                                                                            | CXCL16            | 0,35 |
| solute carrier family 11 (proton-coupled divalent metal ion transporter), member 2                           | SLC11A2           | 0,35 |
| sorting nexin 1                                                                                              | SNX1              | 0,35 |
| histone cluster 1, H2ae                                                                                      | HIST1H2AE         | 0,35 |
| solute carrier family 6 (neurotransmitter transporter), member 11                                            | SLC6A11           | 0,35 |
| zinc finger and SCAN domain containing 5A                                                                    | ZSCAN5A           | 0,34 |
| small integral membrane protein 24                                                                           | SMIM24            | 0,34 |
| sedoheptulokinase; transient receptor potential cation channel, subfamily V, member 1                        | SHPK; TRPV1       | 0,34 |
| UDP-N-acetylglucosamine pyrophosphorylase 1                                                                  | UAP1              | 0,34 |
| fatty acid desaturase 1; microRNA 1908                                                                       | FADS1; MIR1908    | 0,34 |
| Rho guanine nucleotide exchange factor 25                                                                    | ARHGEF25          | 0,34 |
| reticulocalbin 2, EF-hand calcium binding domain                                                             | RCN2              | 0,34 |
| complement component 1, r subcomponent-like                                                                  | C1RL              | 0,34 |
| EF-hand calcium binding domain 11                                                                            | EFCAB11           | 0,34 |
| tripartite motif containing 50                                                                               | TRIM50            | 0,34 |
| Ras association (RalGDS/AF-6) domain family member 4                                                         | RASSF4            | 0,34 |
| chromosome 14 open reading frame 1                                                                           | C14orf1           | 0,34 |
| nuclear receptor subfamily 2, group F, member 6                                                              | NR2F6             | 0,34 |
| zinc finger protein 107; microRNA 6839                                                                       | ZNF107; MIR6839   | 0,34 |
| threonyl-tRNA synthetase-like 2                                                                              | TARSL2            | 0,34 |
| beta-1,4-N-acetyl-galactosaminyl transferase 4                                                               | B4GALNT4          | 0,34 |
| myosin VC                                                                                                    | MYO5C             | 0,34 |
| guanine nucleotide binding protein (G protein), gamma 4                                                      | GNG4              | 0,34 |
| ubiquitin-like with PHD and ring finger domains 1                                                            | UHRF1             | 0,34 |
| pellino E3 ubiquitin protein ligase 1                                                                        | PELI1             | 0,34 |
| lin-28 homolog B (C. elegans)                                                                                | LIN28B            | 0,34 |
| hydroxysteroid (17-beta) dehydrogenase 4                                                                     | HSD17B4           | 0,34 |
| protein phosphatase 4, regulatory subunit 4                                                                  | PPP4R4            | 0,34 |
| protein tyrosine phosphatase, non-receptor type 4 (megakaryocyte)                                            | PTPN4             | 0,34 |
| interferon regulatory factor 2 binding protein 2                                                             | IRF2BP2           | 0,34 |
| golgin B1                                                                                                    | GOLGB1            | 0,34 |
| solute carrier family 9, subfamily A (NHE3, cation proton antiporter 3), member 3 regulator 1; microRNA 3615 | SLC9A3R1; MIR3615 | 0,34 |
| phosphorylase kinase, alpha 2 (liver)                                                                        | PHKA2             | 0,34 |
| mbt domain containing 1                                                                                      | MBTD1             | 0,34 |
| NADH dehydrogenase (ubiquinone) Fe-S protein 7, 20kDa (NADH-coenzyme Q reductase)                            | NDUFS7            | 0,34 |



|                                                                                               |                        |      |
|-----------------------------------------------------------------------------------------------|------------------------|------|
| nudix hydrolase 16                                                                            | NUDT16                 | 0,34 |
| uracil DNA glycosylase                                                                        | UNG                    | 0,33 |
| protein S (alpha)                                                                             | PROS1                  | 0,33 |
| epoxide hydrolase 2, cytoplasmic                                                              | EPHX2                  | 0,33 |
| cyclic nucleotide binding domain containing 2                                                 | CNBD2                  | 0,33 |
| glucuronidase, beta pseudogene 2                                                              | GUSBP2                 | 0,33 |
| selenoprotein N, 1                                                                            | SEPN1                  | 0,33 |
| dipeptidase 1 (renal)                                                                         | DPEP1                  | 0,33 |
| septin 6                                                                                      | sept-06                | 0,33 |
| phosphorylase, glycogen, liver                                                                | PYGL                   | 0,33 |
| histone cluster 1, H2am; histone cluster 1, H3j                                               | HIST1H2AM;<br>HIST1H3J | 0,33 |
| nuclear receptor subfamily 0, group B, member 2                                               | NROB2                  | 0,33 |
| histone cluster 1, H3h                                                                        | HIST1H3H               | 0,33 |
| melanoma inhibitory activity 2                                                                | MIA2                   | 0,33 |
| zinc finger and BTB domain containing 12                                                      | ZBTB12                 | 0,33 |
| insulin-like growth factor 2; INS-IGF2 readthrough                                            | IGF2; INS-IGF2         | 0,33 |
| pregnancy-zone protein                                                                        | PZP                    | 0,33 |
| zinc and ring finger 1, E3 ubiquitin protein ligase                                           | ZNRF1                  | 0,33 |
| solute carrier family 19 (folate transporter), member 1                                       | SLC19A1                | 0,33 |
| alpha-2-glycoprotein 1, zinc-binding                                                          | AZGP1                  | 0,33 |
| EPH receptor B4                                                                               | EPHB4                  | 0,33 |
| CD74 molecule, major histocompatibility complex, class II invariant chain                     | CD74                   | 0,33 |
| family with sequence similarity 3, member C                                                   | FAM3C                  | 0,33 |
| chromosome 11 open reading frame 71                                                           | C11orf71               | 0,33 |
| solute carrier family 9, subfamily A (NHE3, cation proton antiporter 3), member 3 regulator 2 | SLC9A3R2               | 0,33 |
| inositol(myo)-1(or 4)-monophosphatase 2                                                       | IMPA2                  | 0,33 |
| prominin 1                                                                                    | PROM1                  | 0,32 |
| alkB homolog 7                                                                                | ALKBH7                 | 0,32 |
| ST6 beta-galactosamide alpha-2,6-sialyltransferase 1                                          | ST6GAL1                | 0,32 |
| metaxin 2                                                                                     | MTX2                   | 0,32 |
| leucine-rich alpha-2-glycoprotein 1                                                           | LRG1                   | 0,32 |
| pre-B-cell leukemia homeobox 2                                                                | PBX2                   | 0,32 |
| histone cluster 1, H4a                                                                        | HIST1H4A               | 0,32 |
| ubiquitin specific peptidase 27, X-linked                                                     | USP27X                 | 0,32 |
| arylformamidase                                                                               | AFMID                  | 0,32 |
| platelet-derived growth factor receptor-like                                                  | PDGFRL                 | 0,32 |
| chromosome 1 open reading frame 115                                                           | C1orf115               | 0,32 |
| cyclin-dependent kinase 1                                                                     | CDK1                   | 0,32 |
| protocadherin beta 13                                                                         | PCDHB13                | 0,32 |
| family with sequence similarity 208, member A                                                 | FAM208A                | 0,32 |
| neighbor of BRCA1 gene 1                                                                      | NBR1                   | 0,32 |
| zinc finger, CCHC domain containing 3                                                         | ZCCHC3                 | 0,32 |

|                                                                                        |          |      |
|----------------------------------------------------------------------------------------|----------|------|
| brain expressed X-linked 1                                                             | BEX1     | 0,32 |
| choline kinase alpha                                                                   | CHKA     | 0,32 |
| phosphodiesterase 4D, cAMP-specific                                                    | PDE4D    | 0,32 |
| tetraspanin 6                                                                          | TSPAN6   | 0,32 |
| family with sequence similarity 171, member A1                                         | FAM171A1 | 0,32 |
| period circadian clock 3                                                               | PER3     | 0,32 |
| mesencephalic astrocyte-derived neurotrophic factor                                    | MANF     | 0,32 |
| transcriptional adaptor 1                                                              | TADA1    | 0,32 |
| Jeck2013 ALT_ACCEPTOR, ALT_DONOR, coding, INTERNAL, intronic best transcript NM_145177 | DHRX     | 0,32 |
| zinc finger protein 331                                                                | ZNF331   | 0,32 |
| WD repeat domain 59                                                                    | WDR59    | 0,32 |
| aminolevulinate dehydratase                                                            | ALAD     | 0,32 |
| prenylcysteine oxidase 1                                                               | PCYOX1   | 0,32 |
| SH2 domain containing 4A                                                               | SH2D4A   | 0,32 |
| transmembrane protein 53                                                               | TMEM53   | 0,32 |
| secreted protein, acidic, cysteine-rich (osteonectin)                                  | SPARC    | 0,32 |
|                                                                                        | LRIG1    | 0,32 |
| hexose-6-phosphate dehydrogenase (glucose 1-dehydrogenase)                             | H6PD     | 0,32 |
| vacuolar protein sorting 54 homolog (S. cerevisiae)                                    | VPS54    | 0,32 |
| cell death-inducing DFFA-like effector b                                               | CIDEB    | 0,32 |
| ethanolaminephosphotransferase 1                                                       | EPT1     | 0,32 |
| ectonucleotide pyrophosphatase/phosphodiesterase 1                                     | ENPP1    | 0,32 |
| acyl-CoA oxidase 2, branched chain                                                     | ACOX2    | 0,32 |
| von Hippel-Lindau tumor suppressor, E3 ubiquitin protein ligase                        | VHL      | 0,31 |
| Memczak2013 ANTISENSE, CDS, coding, INTERNAL best transcript NM_033133                 | CNP      | 0,31 |
| pyruvate dehydrogenase phosphatase catalytic subunit 2                                 | PDP2     | 0,31 |
| histone cluster 1, H4c                                                                 | HIST1H4C | 0,31 |
| sorbin and SH3 domain containing 3                                                     | SORBS3   | 0,31 |
| C1q and tumor necrosis factor related protein 6                                        | C1QTNF6  | 0,31 |
| Memczak2013 ANTISENSE, CDS, coding, INTERNAL best transcript NM_003105                 | SORL1    | 0,31 |
| endoplasmic reticulum aminopeptidase 1                                                 | ERAP1    | 0,31 |
| agmatinase                                                                             | AGMAT    | 0,31 |
| SLC2A4 regulator                                                                       | SLC2A4RG | 0,31 |
| BTB (POZ) domain containing 2                                                          | BTBD2    | 0,31 |
| lectin, mannose-binding 2-like                                                         | LMAN2L   | 0,31 |
| carboxypeptidase N, polypeptide 2                                                      | CPN2     | 0,31 |
| transmembrane protein 120A                                                             | TMEM120A | 0,31 |
| biotinidase                                                                            | BTD      | 0,31 |
| 1-acylglycerol-3-phosphate O-acyltransferase 3                                         | AGPAT3   | 0,31 |
| chromosome 1 open reading frame 131                                                    | C1orf131 | 0,31 |

|                                                                    |           |      |
|--------------------------------------------------------------------|-----------|------|
| calmodulin-like 4                                                  | CALML4    | 0,31 |
| ornithine aminotransferase                                         | OAT       | 0,31 |
| SPARC related modular calcium binding 1                            | SMOC1     | 0,31 |
| lipin 2                                                            | LPIN2     | 0,31 |
| LDL receptor related protein 6                                     | LRP6      | 0,31 |
| sex determining region Y                                           | SRY       | 0,31 |
| polycomb group ring finger 5                                       | PCGF5     | 0,31 |
| protein tyrosine phosphatase, receptor type, F                     | PTPRF     | 0,31 |
| histone cluster 1, H2bo                                            | HIST1H2BO | 0,31 |
| phosphoribosyl pyrophosphate synthetase-associated protein 1       | PRPSAP1   | 0,31 |
| solute carrier family 44, member 3                                 | SLC44A3   | 0,31 |
| farnesyl-diphosphate farnesyltransferase 1                         | FDFT1     | 0,30 |
| family with sequence similarity 83, member D                       | FAM83D    | 0,30 |
| sperm associated antigen 5                                         | SPAG5     | 0,30 |
| progesterone and adiponectin receptor family member VII            | PAQR7     | 0,30 |
| COX20 cytochrome c oxidase assembly factor                         | COX20     | 0,30 |
| filamin A interacting protein 1-like                               | FILIP1L   | 0,30 |
| leucine-rich repeats and immunoglobulin-like domains 1             | LRIG1     | 0,30 |
| retinol dehydrogenase 11 (all-trans/9-cis/11-cis)                  | RDH11     | 0,30 |
| ilvB (bacterial acetolactate synthase)-like                        | ILVBL     | 0,30 |
| interleukin 17 receptor B                                          | IL17RB    | 0,30 |
| regulatory factor X, 7                                             | RFX7      | 0,30 |
| solute carrier family 47 (multidrug and toxin extrusion), member 1 | SLC47A1   | 0,30 |
| aldehyde dehydrogenase 1 family, member B1                         | ALDH1B1   | 0,30 |
| multiple inositol-polyphosphate phosphatase 1                      | MINPP1    | 0,30 |
| macrophage stimulating 1-like                                      | MST1L     | 0,30 |
| thioredoxin domain containing 15                                   | TXNDC15   | 0,30 |
| histone cluster 1, H4b                                             | HIST1H4B  | 0,30 |
| Rh family, B glycoprotein (gene/pseudogene)                        | RHBG      | 0,30 |
| calmin (calponin-like, transmembrane)                              | CLMN      | 0,30 |
| collagen, type IV, alpha 5                                         | COL4A5    | 0,30 |
| LDL receptor related protein 6                                     | LRP6      | 0,30 |
| protein tyrosine phosphatase, receptor type, K                     | PTPRK     | 0,30 |
| DNA damage inducible transcript 4                                  | DDIT4     | 0,30 |
| glycosylphosphatidylinositol specific phospholipase D1             | GPLD1     | 0,30 |
| activin A receptor type IIB                                        | ACVR2B    | 0,30 |
| glutaredoxin 5                                                     | GLRX5     | 0,30 |
| cleavage and polyadenylation specific factor 4-like                | CPSF4L    | 0,30 |
| chromosome 10 open reading frame 82                                | C10orf82  | 0,30 |
| cyclin-dependent kinase 2 associated protein 1                     | CDK2AP1   | 0,30 |
| zinc finger protein 124                                            | ZNF124    | 0,30 |

|                                                                                                           |               |      |
|-----------------------------------------------------------------------------------------------------------|---------------|------|
| glucosamine (UDP-N-acetyl)-2-epimerase/N-acetylmannosamine kinase                                         | GNE           | 0,30 |
| Rho GTPase activating protein 18                                                                          | ARHGAP18      | 0,29 |
| ATP binding cassette subfamily B member 4                                                                 | ABCB4         | 0,29 |
| thioesterase superfamily member 6                                                                         | THEM6         | 0,29 |
| syntrophin, beta 1 (dystrophin-associated protein A1, 59kDa, basic component 1)                           | SNTB1         | 0,29 |
| SEC13 homolog, nuclear pore and COPII coat complex component                                              | SEC13         | 0,29 |
| heparan sulfate (glucosamine) 3-O-sulfotransferase 3A1                                                    | HS3ST3A1      | 0,29 |
| cingulin-like 1                                                                                           | CGNL1         | 0,29 |
| solute carrier family 39 (zinc transporter), member 7                                                     | SLC39A7       | 0,29 |
| tripartite motif containing 47                                                                            | TRIM47        | 0,29 |
| hepatocyte nuclear factor 4, gamma                                                                        | HNF4G         | 0,29 |
| angiotensinogen (serpin peptidase inhibitor, clade A, member 8)                                           | AGT           | 0,29 |
| transducin (beta)-like 1X-linked                                                                          | TBL1X         | 0,29 |
| alpha-2-HS-glycoprotein                                                                                   | AHSG          | 0,29 |
| sorbin and SH3 domain containing 1                                                                        | SORBS1        | 0,29 |
| acyl-CoA synthetase long-chain family member 4                                                            | ACSL4         | 0,29 |
| biphenyl hydrolase-like (serine hydrolase)                                                                | BPHL          | 0,29 |
| solute carrier family 22 (organic cation transporter), member 3                                           | SLC22A3       | 0,29 |
| tripartite motif containing 15                                                                            | TRIM15        | 0,29 |
| ATP binding cassette subfamily B member 10                                                                | ABCB10        | 0,29 |
| leukemia inhibitory factor receptor alpha                                                                 | LIFR          | 0,29 |
| butyrophilin, subfamily 3, member A3                                                                      | BTN3A3        | 0,29 |
| acyl-CoA synthetase short-chain family member 1                                                           | ACSS1         | 0,29 |
| isochorismatase domain containing 2                                                                       | ISOC2         | 0,29 |
| NSL1, MIS12 kinetochore complex component                                                                 | NSL1          | 0,29 |
| solute carrier family 5 (sodium/myo-inositol cotransporter), member 3; mitochondrial ribosomal protein S6 | SLC5A3; MRPS6 | 0,29 |
| fucosyltransferase 11 (alpha (1,3) fucosyltransferase)                                                    | FUT11         | 0,29 |
| family with sequence similarity 117, member A                                                             | FAM117A       | 0,29 |
| Kazal-type serine peptidase inhibitor domain 1                                                            | KAZALD1       | 0,29 |
| histone cluster 1, H2bl                                                                                   | HIST1H2BL     | 0,29 |
| metastasis suppressor 1-like                                                                              | MTSS1L        | 0,29 |
| M-phase phosphoprotein 10 (U3 small nucleolar ribonucleoprotein)                                          | MPHOSPH10     | 0,29 |
| chromosome 14 open reading frame 28                                                                       | C14orf28      | 0,28 |
| transmembrane p24 trafficking protein 1                                                                   | TMED1         | 0,28 |
| patatin-like phospholipase domain containing 6                                                            | PNPLA6        | 0,28 |
| placental growth factor                                                                                   | PGF           | 0,28 |

|                                                                                 |                        |      |
|---------------------------------------------------------------------------------|------------------------|------|
| Cdk5 and Abl enzyme substrate 2                                                 | CABLES2                | 0,28 |
| DEAQ box RNA-dependent ATPase 1                                                 | DQX1                   | 0,28 |
| complement component 4 binding protein, beta                                    | C4BPB                  | 0,28 |
| solute carrier family 25 (mitochondrial carrier; citrate transporter), member 1 | SLC25A1                | 0,28 |
| creatine kinase, brain                                                          | CKB                    | 0,28 |
| pyruvate dehydrogenase (lipoamide) beta                                         | PDHB                   | 0,28 |
| N-acylsphingosine amidohydrolase (non-lysosomal ceramidase) 2B                  | ASAH2B                 | 0,28 |
| transmembrane and tetratricopeptide repeat containing 4                         | TMTC4                  | 0,28 |
| zinc fingers and homeoboxes 1                                                   | ZHX1                   | 0,28 |
| PH domain and leucine rich repeat protein phosphatase 1                         | PHLPP1                 | 0,28 |
| PR domain containing 11                                                         | PRDM11                 | 0,28 |
| growth differentiation factor 7                                                 | GDF7                   | 0,28 |
| Ral GTPase activating protein, alpha subunit 1 (catalytic)                      | RALGAPA1               | 0,28 |
| microRNA 4728; erb-b2 receptor tyrosine kinase 2                                | MIR4728; ERBB2         | 0,28 |
| leucine-rich repeats and immunoglobulin-like domains 3                          | LRIG3                  | 0,28 |
| ketohexokinase                                                                  | KHK                    | 0,28 |
| inter-alpha-trypsin inhibitor heavy chain 1                                     | ITIH1                  | 0,28 |
| histone cluster 1, H3d; histone cluster 1, H2ad                                 | HIST1H3D;<br>HIST1H2AD | 0,28 |
| ras homolog family member U                                                     | RHOU                   | 0,28 |
| solute carrier family 7 (cationic amino acid transporter, y+ system), member 2  | SLC7A2                 | 0,28 |
| tensin 3                                                                        | TNS3                   | 0,28 |
| pyrroline-5-carboxylate reductase 1                                             | PYCR1                  | 0,28 |
| ATP synthase, H+ transporting, mitochondrial F1 complex, delta subunit          | ATP5D                  | 0,28 |
| procollagen C-endopeptidase enhancer                                            | PCOLCE                 | 0,28 |
| phosphoinositide-3-kinase adaptor protein 1                                     | PIK3AP1                | 0,28 |
| apolipoprotein L1                                                               | APOL1                  | 0,28 |
| ZFP14 zinc finger protein                                                       | ZFP14                  | 0,28 |
| choline phosphotransferase 1                                                    | CHPT1                  | 0,28 |
| ras homolog family member U                                                     | RHOU                   | 0,28 |
| LDL receptor related protein 6                                                  | LRP6                   | 0,28 |
| 24-dehydrocholesterol reductase                                                 | DHCR24                 | 0,28 |
| proline dehydrogenase (oxidase) 2                                               | PRODH2                 | 0,27 |
| phospholipase A2, group IIA (platelets, synovial fluid)                         | PLA2G2A                | 0,27 |
| family with sequence similarity 162, member A                                   | FAM162A                | 0,27 |
| high mobility group box 2                                                       | HMGB2                  | 0,27 |
| espin                                                                           | ESPN                   | 0,27 |

|                                                                                                                                                                                                                                                                                                                                                                                                                                                                                                                                                                                                                                                                                                                                                                |                                                                     |      |
|----------------------------------------------------------------------------------------------------------------------------------------------------------------------------------------------------------------------------------------------------------------------------------------------------------------------------------------------------------------------------------------------------------------------------------------------------------------------------------------------------------------------------------------------------------------------------------------------------------------------------------------------------------------------------------------------------------------------------------------------------------------|---------------------------------------------------------------------|------|
| prune exopolyphosphatase                                                                                                                                                                                                                                                                                                                                                                                                                                                                                                                                                                                                                                                                                                                                       | PRUNE                                                               | 0,27 |
| RAB33B, member RAS oncogene family                                                                                                                                                                                                                                                                                                                                                                                                                                                                                                                                                                                                                                                                                                                             | RAB33B                                                              | 0,27 |
| mannan-binding lectin serine peptidase 2                                                                                                                                                                                                                                                                                                                                                                                                                                                                                                                                                                                                                                                                                                                       | MASP2                                                               | 0,27 |
| cyclin F                                                                                                                                                                                                                                                                                                                                                                                                                                                                                                                                                                                                                                                                                                                                                       | CCNF                                                                | 0,27 |
| E2F transcription factor 8                                                                                                                                                                                                                                                                                                                                                                                                                                                                                                                                                                                                                                                                                                                                     | E2F8                                                                | 0,27 |
| IQ motif containing GTPase activating protein 2                                                                                                                                                                                                                                                                                                                                                                                                                                                                                                                                                                                                                                                                                                                | IQGAP2                                                              | 0,27 |
| protein disulfide isomerase family A, member 5;<br>microRNA 7110                                                                                                                                                                                                                                                                                                                                                                                                                                                                                                                                                                                                                                                                                               | PDIA5; MIR7110                                                      | 0,27 |
| ribonucleoprotein, PTB-binding 2                                                                                                                                                                                                                                                                                                                                                                                                                                                                                                                                                                                                                                                                                                                               | RAVER2                                                              | 0,27 |
| Sp5 transcription factor                                                                                                                                                                                                                                                                                                                                                                                                                                                                                                                                                                                                                                                                                                                                       | SP5                                                                 | 0,27 |
| sulfotransferase family 1E member 1                                                                                                                                                                                                                                                                                                                                                                                                                                                                                                                                                                                                                                                                                                                            | SULT1E1                                                             | 0,27 |
| ATPase, H <sup>+</sup> transporting V0 subunit e2                                                                                                                                                                                                                                                                                                                                                                                                                                                                                                                                                                                                                                                                                                              | ATP6V0E2                                                            | 0,27 |
| X-box binding protein 1                                                                                                                                                                                                                                                                                                                                                                                                                                                                                                                                                                                                                                                                                                                                        | XBP1                                                                | 0,27 |
| tubulin tyrosine ligase-like family member 11                                                                                                                                                                                                                                                                                                                                                                                                                                                                                                                                                                                                                                                                                                                  | TTLL11                                                              | 0,27 |
| fatty acid synthase                                                                                                                                                                                                                                                                                                                                                                                                                                                                                                                                                                                                                                                                                                                                            | FASN                                                                | 0,27 |
| Transcript Identified by AceView, Entrez Gene ID(s) 6660                                                                                                                                                                                                                                                                                                                                                                                                                                                                                                                                                                                                                                                                                                       | SOX5                                                                | 0,27 |
| protein disulfide isomerase family A, member 4                                                                                                                                                                                                                                                                                                                                                                                                                                                                                                                                                                                                                                                                                                                 | PDIA4                                                               | 0,27 |
| secretion regulating guanine nucleotide exchange factor                                                                                                                                                                                                                                                                                                                                                                                                                                                                                                                                                                                                                                                                                                        | SERGEF                                                              | 0,27 |
| selenium binding protein 1                                                                                                                                                                                                                                                                                                                                                                                                                                                                                                                                                                                                                                                                                                                                     | SELENBP1                                                            | 0,27 |
| cell adhesion molecule 1                                                                                                                                                                                                                                                                                                                                                                                                                                                                                                                                                                                                                                                                                                                                       | CADM1                                                               | 0,27 |
| methylmalonic aciduria (cobalamin deficiency) cblC type,<br>with homocystinuria                                                                                                                                                                                                                                                                                                                                                                                                                                                                                                                                                                                                                                                                                | MMACHC                                                              | 0,27 |
| serine hydroxymethyltransferase 1 (soluble); microRNA<br>6778                                                                                                                                                                                                                                                                                                                                                                                                                                                                                                                                                                                                                                                                                                  | SHMT1; MIR6778                                                      | 0,27 |
| emopamil binding protein (sterol isomerase)                                                                                                                                                                                                                                                                                                                                                                                                                                                                                                                                                                                                                                                                                                                    | EBP                                                                 | 0,27 |
| Fc fragment of IgG binding protein                                                                                                                                                                                                                                                                                                                                                                                                                                                                                                                                                                                                                                                                                                                             | FCGBP                                                               | 0,27 |
| uncharacterized LOC389831; Salzman2013 ANNOTATED,<br>CDS, coding, OVCODE, OVEXON, UTR3 best transcript<br>NM_001242480; Salzman2013 ANNOTATED, CDS, coding,<br>OVCODE, OVEXON, UTR3, UTR5 best transcript<br>NM_001242480; Salzman2013 ANNOTATED, ncRNA,<br>OVEXON best transcript TCONS_00030034; Salzman2013<br>ANNOTATED, ncRNA, OVCODE, OVEXON best transcript<br>TCONS_00030034; Salzman2013 ALT_ACCEPTOR, ncRNA,<br>OVCODE, OVEXON, upstream_start best transcript<br>TCONS_00030034; Salzman2013 ALT_DONOR,<br>downstream_end, ncRNA, OVEXON best transcript<br>TCONS_00030035; Salzman2013 ALT_DONOR, coding,<br>intronic, OVEXON, UTR5 best transcript NM_001242480;<br>uncharacterized protein LOC389831 [Source:RefSeq<br>peptide;Acc:NP_001229409] | LOC389831;<br>TCONS_00030034<br>;<br>TCONS_00030035<br>; AC011043.1 | 0,26 |
| tetratricopeptide repeat domain 38                                                                                                                                                                                                                                                                                                                                                                                                                                                                                                                                                                                                                                                                                                                             | TTC38                                                               | 0,26 |
| histone cluster 1, H2bb                                                                                                                                                                                                                                                                                                                                                                                                                                                                                                                                                                                                                                                                                                                                        | HIST1H2BB                                                           | 0,26 |

|                                                                                |              |      |
|--------------------------------------------------------------------------------|--------------|------|
| eukaryotic elongation factor, selenocysteine-tRNA-specific                     | EEFSEC       | 0,26 |
| spire-type actin nucleation factor 2                                           | SPIRE2       | 0,26 |
| insulin-like growth factor 2                                                   | IGF2         | 0,26 |
| diazepam binding inhibitor (GABA receptor modulator, acyl-CoA binding protein) | DBI          | 0,26 |
| par-6 family cell polarity regulator gamma                                     | PARD6G       | 0,26 |
| interferon regulatory factor 2 binding protein-like                            | IRF2BPL      | 0,26 |
| transcription elongation factor A (SII), 3                                     | TCEA3        | 0,26 |
| topoisomerase (DNA) II alpha                                                   | TOP2A        | 0,26 |
| sarcoglycan epsilon                                                            | SGCE         | 0,26 |
| E2F transcription factor 1                                                     | E2F1         | 0,26 |
| placenta specific 8                                                            | PLAC8        | 0,26 |
| nephronectin                                                                   | NPNT         | 0,26 |
| transmembrane protein 97                                                       | TMEM97       | 0,26 |
| cytochrome P450, family 8, subfamily B, polypeptide 1                          | CYP8B1       | 0,26 |
| phospholipid scramblase 4                                                      | PLSCR4       | 0,26 |
| transmembrane protein 64                                                       | TMEM64       | 0,26 |
| Fraser extracellular matrix complex subunit 1                                  | FRAS1        | 0,26 |
| FK506 binding protein 11; ADP-ribosylation factor 3                            | FKBP11; ARF3 | 0,26 |
| amine oxidase, copper containing 3                                             | AOC3         | 0,26 |
| aldehyde dehydrogenase 6 family, member A1                                     | ALDH6A1      | 0,26 |
| carbohydrate (chondroitin 4) sulfotransferase 12                               | CHST12       | 0,26 |
| oligosaccharyltransferase complex subunit (non-catalytic)                      | OSTC         | 0,26 |
| regulator of microtubule dynamics 2                                            | RMDN2        | 0,26 |
| MER proto-oncogene, tyrosine kinase                                            | MERTK        | 0,26 |
| H2A histone family, member Y2                                                  | H2AFY2       | 0,26 |
| chromosome 5 open reading frame 15                                             | C5orf15      | 0,26 |
| collagen, type IX, alpha 3                                                     | COL9A3       | 0,25 |
| connective tissue growth factor                                                | CTGF         | 0,25 |
| lanosterol synthase (2,3-oxidosqualene-lanosterol cyclase)                     | LSS          | 0,25 |
| protein tyrosine kinase 7 (inactive)                                           | PTK7         | 0,25 |
| lamin B1                                                                       | LMNB1        | 0,25 |
| adenylate kinase 4                                                             | AK4          | 0,25 |
| butyrophilin, subfamily 3, member A1                                           | BTN3A1       | 0,25 |
| zinc finger, DHHC-type containing 3                                            | ZDHHC3       | 0,25 |
| KIAA1161                                                                       | KIAA1161     | 0,25 |
| interferon-induced protein with tetratricopeptide repeats 1                    | IFIT1        | 0,25 |
| KDEL (Lys-Asp-Glu-Leu) containing 1                                            | KDEL1        | 0,25 |
| glycolipid transfer protein domain containing 2                                | GLTPD2       | 0,25 |
| interferon induced, with helicase C domain 1                                   | IFIH1        | 0,25 |
| isochorismatase domain containing 1                                            | ISOC1        | 0,25 |

|                                                                  |                       |      |
|------------------------------------------------------------------|-----------------------|------|
| dual specificity phosphatase 16                                  | DUSP16                | 0,25 |
| family with sequence similarity 114, member A1                   | FAM114A1              | 0,25 |
| alpha-1-microglobulin/bikunin precursor                          | AMBP                  | 0,25 |
| procollagen-lysine, 2-oxoglutarate 5-dioxygenase 2               | PLOD2                 | 0,25 |
| Rho guanine nucleotide exchange factor 39                        | ARHGEF39              | 0,25 |
| family with sequence similarity 101, member B                    | FAM101B               | 0,25 |
| SMAD family member 9                                             | SMAD9                 | 0,25 |
| cadherin 16, KSP-cadherin                                        | CDH16                 | 0,24 |
| complement component 2                                           | C2                    | 0,24 |
| zinc finger protein 704                                          | ZNF704                | 0,24 |
| kelch repeat and BTB (POZ) domain containing 7                   | KBTBD7                | 0,24 |
| phosphatidylinositol glycan anchor biosynthesis class Z          | PIGZ                  | 0,24 |
| orthodenticle homeobox 1                                         | OTX1                  | 0,24 |
| phosphoenolpyruvate carboxykinase 1 (soluble)                    | PCK1                  | 0,24 |
| coagulation factor II (thrombin)                                 | F2                    | 0,24 |
| zinc finger, MYM-type 3                                          | ZMYM3                 | 0,24 |
| MAX dimerization protein 4; microRNA 4800                        | MXD4; MIR4800         | 0,24 |
| transthyretin                                                    | TTR                   | 0,24 |
| mal, T-cell differentiation protein 2 (gene/pseudogene)          | MAL2                  | 0,24 |
| pseudouridylate synthase 10                                      | PUS10                 | 0,24 |
| macrophage stimulating 1                                         | MST1                  | 0,24 |
| kininogen 1                                                      | KNG1                  | 0,24 |
| UDP glucuronosyltransferase 2 family, polypeptide A3             | UGT2A3                | 0,24 |
| thiosulfate sulfurtransferase (rhodanese)                        | TST                   | 0,24 |
| DAZ interacting zinc finger protein 1                            | DZIP1                 | 0,24 |
| glycerate kinase                                                 | GLYCK                 | 0,24 |
| inhibin beta C                                                   | INHBC                 | 0,24 |
| prolyl 3-hydroxylase family member 4 (non-enzymatic)             | P3H4                  | 0,24 |
| alveolar soft part sarcoma chromosome region, candidate 1        | ASPSCR1               | 0,24 |
| MLX interacting protein-like                                     | MLXIPL                | 0,24 |
| complement component 4B (Chido blood group)                      | C4B                   | 0,24 |
| complement component 4A (Rodgers blood group)                    | C4A                   | 0,24 |
| tumor necrosis factor receptor superfamily, member 19            | TNFRSF19              | 0,24 |
| histone cluster 2, H3a; histone cluster 2, H3c                   | HIST2H3A;<br>HIST2H3C | 0,24 |
| apolipoprotein F                                                 | APOF                  | 0,24 |
| DNA (cytosine-5-)-methyltransferase 3 alpha                      | DNMT3A                | 0,24 |
| family with sequence similarity 169, member A                    | FAM169A               | 0,24 |
| StAR-related lipid transfer domain containing 4                  | STARD4                | 0,24 |
| cyclin and CBS domain divalent metal cation transport mediator 3 | CNNM3                 | 0,24 |
| sine oculis binding protein homolog                              | SOBP                  | 0,24 |
| isopentenyl-diphosphate delta isomerase 1                        | IDI1                  | 0,23 |
| isocitrate dehydrogenase 1 (NADP+)                               | IDH1                  | 0,23 |



|                                                                                           |           |      |
|-------------------------------------------------------------------------------------------|-----------|------|
| complement component 3                                                                    | C3        | 0,23 |
| serpin peptidase inhibitor, clade A (alpha-1 antiproteinase, antitrypsin), member 10      | SERPINA10 | 0,23 |
| proprotein convertase subtilisin/kexin type 6                                             | PCSK6     | 0,23 |
| alanyl (membrane) aminopeptidase                                                          | ANPEP     | 0,23 |
| coiled-coil domain containing 92                                                          | CCDC92    | 0,23 |
| regulatory factor X-associated protein                                                    | RFXAP     | 0,23 |
| ubiquitin specific peptidase 41                                                           | USP41     | 0,23 |
| stearoyl-CoA desaturase (delta-9-desaturase)                                              | SCD       | 0,23 |
| solute carrier family 2 (facilitated glucose transporter), member 2                       | SLC2A2    | 0,23 |
| zinc finger, CCHC domain containing 2                                                     | ZCCHC2    | 0,23 |
| coagulation factor X                                                                      | F10       | 0,23 |
| tripartite motif containing 74                                                            | TRIM74    | 0,23 |
| transmembrane 7 superfamily member 2                                                      | TM7SF2    | 0,23 |
| procollagen C-endopeptidase enhancer 2                                                    | PCOLCE2   | 0,23 |
| paternally expressed 10                                                                   | PEG10     | 0,23 |
| Rab9 effector protein with kelch motifs                                                   | RABEPK    | 0,23 |
| SEC11 homolog C, signal peptidase complex subunit                                         | SEC11C    | 0,23 |
| solute carrier family 39, member 11                                                       | SLC39A11  | 0,23 |
| inositol 1,4,5-trisphosphate receptor, type 2                                             | ITPR2     | 0,23 |
| sperm associated antigen 4                                                                | SPAG4     | 0,23 |
| BPI fold containing family B, member 1                                                    | BPIFB1    | 0,23 |
| ADP-ribosylation factor like GTPase 15                                                    | ARL15     | 0,23 |
| pipecolic acid oxidase                                                                    | PIPOX     | 0,23 |
| leucine rich repeat containing 3                                                          | LRRC3     | 0,23 |
| prolactin receptor                                                                        | PRLR      | 0,23 |
| pyridoxal-dependent decarboxylase domain containing 2, pseudogene                         | PDXDC2P   | 0,23 |
| von Willebrand factor A domain containing 1                                               | VWA1      | 0,23 |
| crystallin lambda 1                                                                       | CRYL1     | 0,23 |
| pyridoxal-dependent decarboxylase domain containing 1                                     | PDXDC1    | 0,22 |
| potassium channel, inwardly rectifying subfamily J, member 10                             | KCNJ10    | 0,22 |
| ethanolamine-phosphate phospho-lyase                                                      | ETNPPL    | 0,22 |
| transmembrane protein 141                                                                 | TMEM141   | 0,22 |
| Jeck2013 ANTISENSE, CDS, coding, INTERNAL, OVCODE, OVEXON, UTR3 best transcript NM_003542 | HIST1H4C  | 0,22 |
| histone cluster 2, H3a                                                                    | HIST2H3A  | 0,22 |
| glutathione peroxidase 7                                                                  | GPX7      | 0,22 |
| DEP domain containing 1B                                                                  | DEPDC1B   | 0,22 |
| annexin A13                                                                               | ANXA13    | 0,22 |
| poliovirus receptor-related 3                                                             | PVRL3     | 0,22 |
| histone cluster 1, H2ab                                                                   | HIST1H2AB | 0,22 |
| enoyl-CoA, hydratase/3-hydroxyacyl CoA dehydrogenase                                      | EHHADH    | 0,22 |

|                                                                                              |          |      |
|----------------------------------------------------------------------------------------------|----------|------|
| insulin induced gene 2                                                                       | INSIG2   | 0,22 |
| glycosyltransferase 8 domain containing 1                                                    | GLT8D1   | 0,22 |
| LDL receptor related protein 6                                                               | LRP6     | 0,22 |
| fucosyltransferase 6 (alpha (1,3) fucosyltransferase)                                        | FUT6     | 0,22 |
| lipase A, lysosomal acid, cholesterol esterase                                               | LIPA     | 0,22 |
| transmembrane p24 trafficking protein 3                                                      | TMED3    | 0,22 |
| Fc fragment of IgG, receptor, transporter, alpha                                             | FCGRT    | 0,22 |
| TOX high mobility group box family member 3                                                  | TOX3     | 0,22 |
| KN motif and ankyrin repeat domains 1                                                        | KANK1    | 0,22 |
| potassium channel tetramerization domain containing 3                                        | KCTD3    | 0,22 |
| solute carrier family 46 (folate transporter), member 1                                      | SLC46A1  | 0,22 |
| interleukin 1 receptor antagonist                                                            | IL1RN    | 0,22 |
| catenin, beta interacting protein 1                                                          | CTNNBIP1 | 0,22 |
| farnesyl diphosphate synthase                                                                | FDPS     | 0,22 |
| glycogenin 2                                                                                 | GYG2     | 0,22 |
| UDP glucuronosyltransferase 2 family, polypeptide B7                                         | UGT2B7   | 0,22 |
| cell adhesion associated, oncogene regulated                                                 | CDON     | 0,22 |
| Memczak2013 ALT_ACCEPTOR, ALT_DONOR, coding, INTERNAL, intronic best transcript NM_001098207 | HNRNPF   | 0,21 |
| APC membrane recruitment protein 1                                                           | AMER1    | 0,21 |
| feline leukemia virus subgroup C cellular receptor 1                                         | FLVCR1   | 0,21 |
| CTD small phosphatase 1                                                                      | CTDSP1   | 0,21 |
| glycosyltransferase-like 1B                                                                  | GYLTL1B  | 0,21 |
| solute carrier family 19 (thiamine transporter), member 2                                    | SLC19A2  | 0,21 |
| transmembrane protein 170B                                                                   | TMEM170B | 0,21 |
| yippee like 2                                                                                | YPEL2    | 0,21 |
| non-SMC condensin I complex subunit D2                                                       | NCAPD2   | 0,21 |
| sterol-C5-desaturase                                                                         | SC5D     | 0,21 |
| KIAA2013                                                                                     | KIAA2013 | 0,21 |
| histone cluster 1, H4d                                                                       | HIST1H4D | 0,21 |
| phospholipase A2, group IB (pancreas)                                                        | PLA2G1B  | 0,21 |
| lipase maturation factor 1                                                                   | LMF1     | 0,21 |
| S-phase kinase-associated protein 2, E3 ubiquitin protein ligase                             | SKP2     | 0,21 |
| phosphatidylinositol-specific phospholipase C, X domain containing 1                         | PLCXD1   | 0,21 |
| cordon-bleu WH2 repeat protein like 1                                                        | COBLL1   | 0,21 |
| LDL receptor related protein 3                                                               | LRP3     | 0,21 |
| NEDD4 binding protein 2                                                                      | N4BP2    | 0,21 |
| microsomal glutathione S-transferase 2                                                       | MGST2    | 0,21 |
| aarF domain containing kinase 3                                                              | ADCK3    | 0,21 |
| phosphate cytidylyltransferase 2, ethanolamine                                               | PCYT2    | 0,21 |
| Memczak2013 ANTISENSE, CDS, coding, INTERNAL best transcript NM_005319                       | HIST1H1C | 0,21 |

|                                                                                                                                 |                                              |      |
|---------------------------------------------------------------------------------------------------------------------------------|----------------------------------------------|------|
| DNA-damage regulated autophagy modulator 1                                                                                      | DRAM1                                        | 0,21 |
| glycerophosphodiester phosphodiesterase domain containing 5                                                                     | GDPD5                                        | 0,21 |
| GDP-mannose 4,6-dehydratase                                                                                                     | GMDS                                         | 0,21 |
| cytochrome b5 type A (microsomal)                                                                                               | CYB5A                                        | 0,21 |
| retinoic acid receptor responder (tazarotene induced) 2                                                                         | RARRES2                                      | 0,21 |
| carboxylesterase 3; carboxylesterase 2                                                                                          | CES3; CES2                                   | 0,21 |
| N-acetylneuraminic acid synthase                                                                                                | NANS                                         | 0,21 |
| von Willebrand factor C and EGF domains                                                                                         | VWCE                                         | 0,21 |
| interleukin 1 receptor, type I                                                                                                  | IL1R1                                        | 0,21 |
| ArfGAP with FG repeats 2                                                                                                        | AGFG2                                        | 0,21 |
| melanoma antigen family D4B; melanoma antigen family D4; small nucleolar RNA, H/ACA box 11D                                     | MAGED4B;<br>MAGED4;<br>SNORA11D              | 0,20 |
| TIMP metalloproteinase inhibitor 3                                                                                              | TIMP3                                        | 0,20 |
| phosphoinositide-3-kinase, regulatory subunit 2 (beta); interferon, gamma-inducible protein 30                                  | PIK3R2; IFI30                                | 0,20 |
| zinc finger, SWIM-type containing 5                                                                                             | ZSWIM5                                       | 0,20 |
| Wolfram syndrome 1 (wolframin)                                                                                                  | WFS1                                         | 0,20 |
| plasminogen-like B2                                                                                                             | PLGLB2                                       | 0,20 |
| mannosyl (alpha-1,3-)-glycoprotein beta-1,4-N-acetylglucosaminyltransferase, isozyme A                                          | MGAT4A                                       | 0,20 |
| nuclear factor, erythroid 2                                                                                                     | NFE2                                         | 0,20 |
| hepatocellular carcinoma, down-regulated 1                                                                                      | HEPN1                                        | 0,20 |
| solute carrier family 38, member 4                                                                                              | SLC38A4                                      | 0,20 |
| guanine nucleotide binding protein (G protein), gamma 7                                                                         | GNG7                                         | 0,20 |
| receptor tyrosine kinase-like orphan receptor 1                                                                                 | ROR1                                         | 0,20 |
| hepatocyte nuclear factor 4, alpha                                                                                              | HNF4A                                        | 0,20 |
| APOBEC1 complementation factor                                                                                                  | A1CF                                         | 0,20 |
| ATPase, Cu <sup>++</sup> transporting, beta polypeptide                                                                         | ATP7B                                        | 0,20 |
| melanoma antigen family D4; melanoma antigen family D4B; small nucleolar RNA, H/ACA box 11D; small nucleolar RNA, H/ACA box 11E | MAGED4;<br>MAGED4B;<br>SNORA11D;<br>SNORA11E | 0,20 |
| unc-93 homolog A (C. elegans)                                                                                                   | UNC93A                                       | 0,20 |
| multivesicular body subunit 12B                                                                                                 | MVB12B                                       | 0,20 |
| butyrophilin, subfamily 3, member A2                                                                                            | BTN3A2                                       | 0,20 |
| ADAM metalloproteinase domain 22                                                                                                | ADAM22                                       | 0,20 |
| coiled-coil domain containing 92                                                                                                | CCDC92                                       | 0,20 |
| tumor necrosis factor, alpha-induced protein 8-like 1                                                                           | TNFAIP8L1                                    | 0,20 |
| chemokine (C-C motif) ligand 20                                                                                                 | CCL20                                        | 0,20 |
| oxysterol binding protein 2                                                                                                     | OSBP2                                        | 0,19 |
| crystallin alpha A                                                                                                              | CRYAA                                        | 0,19 |
| acyl-CoA thioesterase 2                                                                                                         | ACOT2                                        | 0,19 |

|                                                                      |              |      |
|----------------------------------------------------------------------|--------------|------|
| 7-dehydrocholesterol reductase                                       | DHCR7        | 0,19 |
| RAB4A, member RAS oncogene family; S-phase response (cyclin related) | RAB4A; SPHAR | 0,19 |
| apolipoprotein B mRNA editing enzyme, catalytic polypeptide-like 3F  | APOBEC3F     | 0,19 |
| acyl-CoA thioesterase 1                                              | ACOT1        | 0,19 |
| peroxisome proliferator-activated receptor alpha                     | PPARA        | 0,19 |
| forkhead box A3                                                      | FOXA3        | 0,19 |
| ATP binding cassette subfamily G member 8                            | ABCG8        | 0,19 |
| nucleoporin 210kDa                                                   | NUP210       | 0,19 |
| tetratricopeptide repeat domain 21B                                  | TTC21B       | 0,19 |
| glycerol-3-phosphate acyltransferase, mitochondrial                  | GPAM         | 0,19 |
| G protein-coupled receptor 160                                       | GPR160       | 0,19 |
| dopa decarboxylase                                                   | DDC          | 0,19 |
| tocopherol (alpha) transfer protein                                  | TTPA         | 0,19 |
| sialidase 4                                                          | NEU4         | 0,19 |
| glypican 6                                                           | GPC6         | 0,19 |
| ADP-ribosyltransferase 4 (Dombrock blood group)                      | ART4         | 0,19 |
| hepatic leukemia factor                                              | HLF          | 0,19 |
| interleukin 1 receptor accessory protein                             | IL1RAP       | 0,19 |
| neuronal regeneration related protein                                | NREP         | 0,19 |
| serpin peptidase inhibitor, clade D (heparin cofactor), member 1     | SERPIND1     | 0,19 |
| G protein-coupled receptor 119                                       | GPR119       | 0,19 |
| triokinase/FMN cyclase                                               | TKFC         | 0,19 |
| monocyte to macrophage differentiation-associated                    | MMD          | 0,19 |
| ubiquitin specific peptidase 18                                      | USP18        | 0,19 |
| FXD domain containing ion transport regulator 1                      | FXD1         | 0,19 |
| serpin peptidase inhibitor, clade C (antithrombin), member 1         | SERPINC1     | 0,19 |
| RAB11 family interacting protein 3 (class II)                        | RAB11FIP3    | 0,19 |
| asparaginase like 1                                                  | ASRGL1       | 0,19 |
| fatty acid hydroxylase domain containing 2                           | FAXDC2       | 0,19 |
| fatty acid desaturase 2                                              | FADS2        | 0,18 |
| pyruvate kinase, liver and RBC                                       | PKLR         | 0,18 |
| ubiquitin D                                                          | UBD          | 0,18 |
| matrilin 3                                                           | MATN3        | 0,18 |
| KN motif and ankyrin repeat domains 4                                | KANK4        | 0,18 |
| galactokinase 1                                                      | GALK1        | 0,18 |
| phosphatidylethanolamine binding protein 1                           | PEBP1        | 0,18 |
| regucalcin                                                           | RGN          | 0,18 |
| scavenger receptor cysteine rich family, 4 domains                   | SSC4D        | 0,18 |
| methylmalonyl CoA epimerase                                          | MCEE         | 0,18 |
| collagen, type XXVII, alpha 1                                        | COL27A1      | 0,18 |
| serum/glucocorticoid regulated kinase 1                              | SGK1         | 0,18 |

|                                                                                 |                       |      |
|---------------------------------------------------------------------------------|-----------------------|------|
| fibroblast growth factor receptor 4                                             | FGFR4                 | 0,18 |
| LDL receptor related protein 6                                                  | LRP6                  | 0,18 |
| transmembrane protein 135                                                       | TMEM135               | 0,18 |
| UDP glucuronosyltransferase 2 family, polypeptide B28                           | UGT2B28               | 0,18 |
| myosin X                                                                        | MYO10                 | 0,18 |
| coagulation factor V (proaccelerin, labile factor)                              | F5                    | 0,18 |
| carboxypeptidase N, polypeptide 1                                               | CPN1                  | 0,18 |
| transmembrane protein 37                                                        | TMEM37                | 0,18 |
| growth hormone regulated TBC protein 1                                          | GRTP1                 | 0,18 |
| phenylalanine hydroxylase                                                       | PAH                   | 0,18 |
| sema domain, transmembrane domain (TM), and cytoplasmic domain, (semaphorin) 6B | SEMA6B                | 0,18 |
| GATA binding protein 4                                                          | GATA4                 | 0,18 |
| electron-transferring-flavoprotein dehydrogenase                                | ETFDH                 | 0,18 |
| delta-like 1 homolog (Drosophila)                                               | DLK1                  | 0,18 |
| cytochrome P450, family 51, subfamily A, polypeptide 1                          | CYP51A1               | 0,17 |
| phosphatidylinositol-specific phospholipase C, X domain containing 1            | PLCXD1                | 0,17 |
| RAB11 family interacting protein 4 (class II); microRNA 4724                    | RAB11FIP4;<br>MIR4724 | 0,17 |
| protein phosphatase, Mg <sup>2+</sup> /Mn <sup>2+</sup> dependent, 1H           | PPM1H                 | 0,17 |
| melanocortin 2 receptor accessory protein 2                                     | MRAP2                 | 0,17 |
| coagulation factor X                                                            | F10                   | 0,17 |
| histone cluster 2, H4a; histone cluster 2, H4b                                  | HIST2H4A;<br>HIST2H4B | 0,17 |
| glutamate dehydrogenase 2                                                       | GLUD2                 | 0,17 |
| complement component 6                                                          | C6                    | 0,17 |
| peroxisome proliferator-activated receptor gamma, coactivator 1 alpha           | PPARGC1A              | 0,17 |
| solute carrier family 6 (neurotransmitter transporter), member 12               | SLC6A12               | 0,17 |
| kinesin family member 20A                                                       | KIF20A                | 0,17 |
| angiopoietin like 8                                                             | ANGPTL8               | 0,17 |
| SRY box 9                                                                       | SOX9                  | 0,17 |
| smoothened, frizzled class receptor                                             | SMO                   | 0,17 |
| ankyrin repeat domain 54; microRNA 658                                          | ANKRD54;<br>MIR658    | 0,17 |
| histone cluster 2, H4b; histone cluster 2, H4a                                  | HIST2H4B;<br>HIST2H4A | 0,17 |
| cAMP responsive element binding protein 3-like 3                                | CREB3L3               | 0,17 |
| aminoadipate-semialdehyde synthase                                              | AASS                  | 0,17 |
| lysophosphatidic acid receptor 6                                                | LPAR6                 | 0,17 |
| glutamate dehydrogenase 1                                                       | GLUD1                 | 0,17 |
| glycoprotein hormone alpha 2                                                    | GPHA2                 | 0,16 |
| vasorin                                                                         | VASN                  | 0,16 |

|                                                                                                                        |                |      |
|------------------------------------------------------------------------------------------------------------------------|----------------|------|
| NDRG family member 2; microRNA 6717                                                                                    | NDRG2; MIR6717 | 0,16 |
| coenzyme Q10A                                                                                                          | COQ10A         | 0,16 |
| heparan sulfate (glucosamine) 3-O-sulfotransferase 3B1                                                                 | HS3ST3B1       | 0,16 |
| heparan sulfate 6-O-sulfotransferase 1                                                                                 | HS6ST1         | 0,16 |
| complement factor B                                                                                                    | CFB            | 0,16 |
| chromosome 2 open reading frame 72                                                                                     | C2orf72        | 0,16 |
| 5-hydroxytryptamine (serotonin) receptor 3B, ionotropic                                                                | HTR3B          | 0,16 |
| complement component 7                                                                                                 | C7             | 0,16 |
| MAGE family member D1                                                                                                  | MAGED1         | 0,16 |
| 3-hydroxy-3-methylglutaryl-CoA reductase                                                                               | HMGCR          | 0,16 |
| solute carrier family 17, member 2                                                                                     | SLC17A2        | 0,16 |
| complement component 4 binding protein, alpha                                                                          | C4BPA          | 0,16 |
| pleckstrin homology domain containing, family B<br>(evectins) member 1                                                 | PLEKHB1        | 0,16 |
| solute carrier family 16 (aromatic amino acid<br>transporter), member 10                                               | SLC16A10       | 0,16 |
| glutathione S-transferase alpha 1                                                                                      | GSTA1          | 0,16 |
| inhibitor of kappa light polypeptide gene enhancer in B-<br>cells, kinase complex-associated protein                   | IKBKAP         | 0,16 |
| coagulation factor X                                                                                                   | F10            | 0,16 |
| tet methylcytosine dioxygenase 1                                                                                       | TET1           | 0,15 |
| transforming, acidic coiled-coil containing protein 1                                                                  | TACC1          | 0,15 |
| neuroligin 4, Y-linked                                                                                                 | NLGN4Y         | 0,15 |
| sema domain, immunoglobulin domain (Ig),<br>transmembrane domain (TM) and short cytoplasmic<br>domain, (semaphorin) 4G | SEMA4G         | 0,15 |
| gap junction protein beta 1                                                                                            | GJB1           | 0,15 |
| sodium channel, voltage gated, type IX alpha subunit                                                                   | SCN9A          | 0,15 |
| solute carrier family 39 (zinc transporter), member 5                                                                  | SLC39A5        | 0,15 |
| CDC42 effector protein (Rho GTPase binding) 4                                                                          | CDC42EP4       | 0,15 |
| mevalonate kinase                                                                                                      | MVK            | 0,15 |
| solute carrier family 39 (zinc transporter), member 14                                                                 | SLC39A14       | 0,15 |
| SRY box 5                                                                                                              | SOX5           | 0,15 |
| carbohydrate (chondroitin 4) sulfotransferase 13                                                                       | CHST13         | 0,15 |
| colorectal cancer associated 2                                                                                         | COLCA2         | 0,15 |
| 2,3-cyclic nucleotide 3 phosphodiesterase                                                                              | CNP            | 0,15 |
| angiotensin II receptor, type 1                                                                                        | AGTR1          | 0,15 |
| angiopoietin like 1                                                                                                    | ANGPTL1        | 0,15 |
| mitochondrial amidoxime reducing component 1                                                                           | MARC1          | 0,15 |
| tumor necrosis factor (ligand) superfamily, member 10                                                                  | TNFSF10        | 0,15 |
| syndecan 2                                                                                                             | SDC2           | 0,15 |
| GIPC PDZ domain containing family, member 2                                                                            | GIPC2          | 0,14 |
| Ca++-dependent secretion activator 2                                                                                   | CADPS2         | 0,14 |
| choline phosphotransferase 1                                                                                           | CHPT1          | 0,14 |

|                                                                         |          |      |
|-------------------------------------------------------------------------|----------|------|
| ephrin-A1                                                               | EFNA1    | 0,14 |
| dual specificity phosphatase 9                                          | DUSP9    | 0,14 |
| chromosome 11 open reading frame 54                                     | C11orf54 | 0,14 |
| phosphoglucomutase 1                                                    | PGM1     | 0,14 |
| fibrinogen alpha chain                                                  | FGA      | 0,14 |
| apolipoprotein M                                                        | APOM     | 0,14 |
| ribosomal protein S6 kinase, 90kDa, polypeptide 3                       | RPS6KA3  | 0,14 |
| Memczak2013 ANTISENSE, coding, INTERNAL, UTR3 best transcript NM_002567 | PEBP1    | 0,14 |
| 3-hydroxy-3-methylglutaryl-CoA synthase 1 (soluble)                     | HMGCS1   | 0,14 |
| hydroxyacyl-CoA dehydrogenase                                           | HADH     | 0,14 |
| guanidinoacetate N-methyltransferase                                    | GAMT     | 0,14 |
| sarcosine dehydrogenase                                                 | SARDH    | 0,14 |
| DAB2 interacting protein                                                | DAB2IP   | 0,14 |
| reelin                                                                  | RELN     | 0,14 |
| acyl-CoA dehydrogenase, short/branched chain                            | ACADSB   | 0,14 |
| sorbin and SH3 domain containing 2                                      | SORBS2   | 0,14 |
| scavenger receptor class A, member 3                                    | SCARA3   | 0,14 |
| solute carrier family 19 (thiamine transporter), member 3               | SLC19A3  | 0,14 |
| aldolase C, fructose-bisphosphate                                       | ALDOC    | 0,13 |
| amidohydrolase domain containing 1                                      | AMDHD1   | 0,13 |
| methylmalonic aciduria (cobalamin deficiency) cblB type                 | MMAB     | 0,13 |
| FK506 binding protein 14                                                | FKBP14   | 0,13 |
| membrane protein, palmitoylated 7                                       | MPP7     | 0,13 |
| apolipoprotein A-I                                                      | APOA1    | 0,13 |
| vav 3 guanine nucleotide exchange factor                                | VAV3     | 0,13 |
| marker of proliferation Ki-67                                           | MKI67    | 0,13 |
| vitronectin                                                             | VTN      | 0,13 |
| obscurin-like 1                                                         | OBSL1    | 0,13 |
| solute carrier family 25, member 42                                     | SLC25A42 | 0,13 |
| mitogen-activated protein kinase kinase 6                               | MAP2K6   | 0,13 |
| frizzled class receptor 4                                               | FZD4     | 0,13 |
| ectonucleoside triphosphate diphosphohydrolase 7                        | ENTPD7   | 0,13 |
| mevalonate (diphospho) decarboxylase                                    | MVD      | 0,13 |
| tripartite motif containing 73                                          | TRIM73   | 0,13 |
| prolyl 3-hydroxylase 1                                                  | P3H1     | 0,13 |
| hepcidin antimicrobial peptide                                          | HAMP     | 0,13 |
| transmembrane protein 45A                                               | TMEM45A  | 0,13 |
| tubulin, beta 1 class VI                                                | TUBB1    | 0,13 |
| villin 1                                                                | VIL1     | 0,12 |
| aldehyde dehydrogenase 18 family, member A1                             | ALDH18A1 | 0,12 |
| family with sequence similarity 20, member C                            | FAM20C   | 0,12 |
| sterol O-acyltransferase 2                                              | SOAT2    | 0,12 |

|                                                                                 |                            |      |
|---------------------------------------------------------------------------------|----------------------------|------|
| heparan sulfate (glucosamine) 3-O-sulfotransferase 5                            | HS3ST5                     | 0,12 |
| erythropoietin                                                                  | EPO                        | 0,12 |
| anthrax toxin receptor 1                                                        | ANTXR1                     | 0,12 |
| angiogenin, ribonuclease, RNase A family, 5;<br>ribonuclease, RNase A family, 4 | ANG; RNASE4                | 0,12 |
| phosphatidylinositol-4-phosphate 5-kinase, type I, beta                         | PIP5K1B                    | 0,12 |
| membrane bound O-acyltransferase domain containing 4                            | MBOAT4                     | 0,12 |
| ELOVL fatty acid elongase 2                                                     | ELOVL2                     | 0,12 |
| alpha-fetoprotein                                                               | AFP                        | 0,12 |
| solute carrier family 2 (facilitated glucose transporter),<br>member 10         | SLC2A10                    | 0,12 |
| methyltransferase like 7A                                                       | METTL7A                    | 0,12 |
| argininosuccinate synthase 1                                                    | ASS1                       | 0,12 |
| phospholipid phosphatase related 1                                              | PLPPR1                     | 0,12 |
| sortilin-related receptor, L(DLR class) A repeats<br>containing                 | SORL1                      | 0,11 |
| pantothenate kinase 1                                                           | PANK1                      | 0,11 |
| carboxypeptidase B2 (plasma)                                                    | CPB2                       | 0,11 |
| erb-b2 receptor tyrosine kinase 3                                               | ERBB3                      | 0,11 |
| immunoglobulin superfamily, DCC subclass, member 3                              | IGDCC3                     | 0,11 |
| lecithin-cholesterol acyltransferase                                            | LCAT                       | 0,11 |
| hydroxysteroid (11-beta) dehydrogenase 2                                        | HSD11B2                    | 0,11 |
| LY75-CD302 readthrough; CD302 molecule; lymphocyte<br>antigen 75                | LY75-CD302;<br>CD302; LY75 | 0,11 |
| family with sequence similarity 20, member A                                    | FAM20A                     | 0,11 |
| N-acetylated alpha-linked acidic dipeptidase 2                                  | NAALAD2                    | 0,11 |
| carbonic anhydrase VA, mitochondrial                                            | CA5A                       | 0,11 |
| cyclin and CBS domain divalent metal cation transport<br>mediator 1             | CNNM1                      | 0,11 |
| NAD kinase 2, mitochondrial                                                     | NADK2                      | 0,11 |
| solute carrier family 6 (neurotransmitter transporter,<br>glycine), member 9    | SLC6A9                     | 0,11 |
| squalene epoxidase                                                              | SQLE                       | 0,11 |
| glutamic pyruvate transaminase (alanine<br>aminotransferase) 2                  | GPT2                       | 0,11 |
| complement component 5                                                          | C5                         | 0,11 |
| solute carrier family 10, member 5                                              | SLC10A5                    | 0,11 |
| coagulation factor VII (serum prothrombin conversion<br>accelerator)            | F7                         | 0,11 |
| tetratricopeptide repeat domain 39B                                             | TTC39B                     | 0,11 |
| docking protein 6                                                               | DOK6                       | 0,10 |
| alpha-2-macroglobulin                                                           | A2M                        | 0,10 |
| 3-hydroxybutyrate dehydrogenase, type 1                                         | BDH1                       | 0,10 |
| DIX domain containing 1                                                         | DIXDC1                     | 0,10 |



|                                                                                             |                 |      |
|---------------------------------------------------------------------------------------------|-----------------|------|
| hepatic and glial cell adhesion molecule                                                    | HEPACAM         | 0,10 |
| testis-specific kinase 2                                                                    | TESK2           | 0,10 |
| deiodinase, iodothyronine, type I                                                           | DIO1            | 0,10 |
| small leucine-rich protein 1                                                                | SMLR1           | 0,10 |
| hydroxysteroid (17-beta) dehydrogenase 7                                                    | HSD17B7         | 0,10 |
| hemopexin                                                                                   | HPX             | 0,10 |
| complement factor I                                                                         | CFI             | 0,10 |
| acetyl-CoA acetyltransferase 2                                                              | ACAT2           | 0,10 |
| UDP glucuronosyltransferase 2 family, polypeptide B11                                       | UGT2B11         | 0,10 |
| sodium channel, voltage gated, type I alpha subunit                                         | SCN1A           | 0,10 |
| asialoglycoprotein receptor 1                                                               | ASGR1           | 0,10 |
| G protein-coupled estrogen receptor 1                                                       | GPER1           | 0,10 |
| solute carrier family 25 (pyrimidine nucleotide carrier), member 33                         | SLC25A33        | 0,10 |
| protein Z, vitamin K-dependent plasma glycoprotein                                          | PROZ            | 0,10 |
| 6-phosphofructo-2-kinase/fructose-2,6-biphosphatase 4; microRNA 6823                        | PFKFB4; MIR6823 | 0,10 |
| beta-1,4-glucuronyltransferase 1                                                            | B4GAT1          | 0,10 |
| lipase, hepatic                                                                             | LIPC            | 0,09 |
| fibroblast growth factor receptor 3                                                         | FGFR3           | 0,09 |
| nidogen 1                                                                                   | NID1            | 0,09 |
| glycoprotein 2 (zymogen granule membrane)                                                   | GP2             | 0,09 |
| family with sequence similarity 3, member B                                                 | FAM3B           | 0,09 |
| albumin                                                                                     | ALB             | 0,09 |
| phospholipase A2, group XIIB                                                                | PLA2G12B        | 0,09 |
| liver expressed antimicrobial peptide 2                                                     | LEAP2           | 0,09 |
| transforming growth factor beta receptor III                                                | TGFB3           | 0,09 |
| SRY box 6; microRNA 6073                                                                    | SOX6; MIR6073   | 0,08 |
| iroquois homeobox 3                                                                         | IRX3            | 0,08 |
| UDP glucuronosyltransferase 2 family, polypeptide B4                                        | UGT2B4          | 0,08 |
| acyl-CoA synthetase medium-chain family member 2B                                           | ACSM2B          | 0,08 |
| RAB17, member RAS oncogene family                                                           | RAB17           | 0,08 |
| hematopoietically expressed homeobox                                                        | HHEX            | 0,08 |
| N-acylsphingosine amidohydrolase (non-lysosomal ceramidase) 2                               | ASAH2           | 0,08 |
| fibrinogen gamma chain                                                                      | FGG             | 0,08 |
| MPV17 mitochondrial membrane protein-like                                                   | MPV17L          | 0,08 |
| mannan-binding lectin serine peptidase 1 (C4/C2 activating component of Ra-reactive factor) | MASP1           | 0,08 |
| transferrin                                                                                 | TF              | 0,08 |
| alcohol dehydrogenase 6 (class V)                                                           | ADH6            | 0,08 |
| mitochondrial pyruvate carrier 1                                                            | MPC1            | 0,08 |
| ectonucleotide pyrophosphatase/phosphodiesterase 2                                          | ENPP2           | 0,08 |
| chromosome 10 open reading frame 10                                                         | C10orf10        | 0,08 |
| paternally expressed 3; zinc finger, imprinted 2                                            | PEG3; ZIM2      | 0,07 |

|                                                                                      |                |      |
|--------------------------------------------------------------------------------------|----------------|------|
| UDP glucuronosyltransferase 2 family, polypeptide B10                                | UGT2B10        | 0,07 |
| tescalcin                                                                            | TESC           | 0,07 |
| crystallin alpha A                                                                   | CRYAA          | 0,07 |
| inter-alpha-trypsin inhibitor heavy chain 3                                          | ITIH3          | 0,07 |
| growth arrest-specific 2                                                             | GAS2           | 0,07 |
| plasminogen-like B1; plasminogen-like B2                                             | PLGLB1; PLGLB2 | 0,07 |
| progesterin and adipoQ receptor family member VIII                                   | PAQR8          | 0,07 |
| serpin peptidase inhibitor, clade A (alpha-1 antiproteinase, antitrypsin), member 3  | SERPINA3       | 0,06 |
| flavin containing monooxygenase 5                                                    | FMO5           | 0,06 |
| basal cell adhesion molecule (Lutheran blood group)                                  | BCAM           | 0,06 |
| hepsin                                                                               | HPN            | 0,06 |
| aldo-keto reductase family 1, member D1                                              | AKR1D1         | 0,06 |
| solute carrier family 5 (sodium/sugar cotransporter), member 9                       | SLC5A9         | 0,06 |
| complement component 8, alpha polypeptide                                            | C8A            | 0,06 |
| solute carrier family 13 (sodium-dependent citrate transporter), member 5            | SLC13A5        | 0,05 |
| kelch-like family member 14                                                          | KLHL14         | 0,05 |
| ectonucleotide pyrophosphatase/phosphodiesterase 3                                   | ENPP3          | 0,05 |
| glucagon-like peptide 2 receptor                                                     | GLP2R          | 0,05 |
| growth regulation by estrogen in breast cancer 1                                     | GREB1          | 0,05 |
| fibrinogen beta chain                                                                | FGB            | 0,05 |
| proprotein convertase subtilisin/kexin type 9                                        | PCSK9          | 0,05 |
| long intergenic non-protein coding RNA 668                                           | LINC00668      | 0,05 |
| fibrinogen like 1                                                                    | FGL1           | 0,05 |
| endoplasmic reticulum protein 27                                                     | ERP27          | 0,05 |
| progesterin and adipoQ receptor family member IX                                     | PAQR9          | 0,05 |
| serpin peptidase inhibitor, clade A (alpha-1 antiproteinase, antitrypsin), member 11 | SERPINA11      | 0,05 |
| patatin-like phospholipase domain containing 3                                       | PNPLA3         | 0,05 |
| FRAS1 related extracellular matrix 1                                                 | FREM1          | 0,04 |
| one cut homeobox 1                                                                   | ONECUT1        | 0,04 |
| solute carrier family 22 (organic anion transporter), member 9                       | SLC22A9        | 0,04 |
| selenoprotein P, plasma, 1                                                           | SEPP1          | 0,04 |
| serpin peptidase inhibitor, clade A (alpha-1 antiproteinase, antitrypsin), member 6  | SERPINA6       | 0,04 |
| alanine-glyoxylate aminotransferase                                                  | AGXT           | 0,04 |
| mannose-binding lectin (protein C) 2, soluble                                        | MBL2           | 0,04 |
| serpin peptidase inhibitor, clade A (alpha-1 antiproteinase, antitrypsin), member 4  | SERPINA4       | 0,04 |
| Mix paired-like homeobox                                                             | MIXL1          | 0,04 |
| diacylglycerol kinase, kappa                                                         | DGKK           | 0,04 |

|                                                                                                        |                |      |
|--------------------------------------------------------------------------------------------------------|----------------|------|
| solute carrier organic anion transporter family, member 4C1                                            | SLCO4C1        | 0,04 |
| chemokine (C-X3-C motif) ligand 1                                                                      | CX3CL1         | 0,04 |
| haptoglobin                                                                                            | HP             | 0,04 |
| solute carrier family 38, member 11                                                                    | SLC38A11       | 0,04 |
| haptoglobin-related protein                                                                            | HPR            | 0,03 |
| plasminogen                                                                                            | PLG            | 0,03 |
| solute carrier family 30, member 10                                                                    | SLC30A10       | 0,03 |
| acyl-CoA synthetase medium-chain family member 3                                                       | ACSM3          | 0,03 |
| apolipoprotein C-III                                                                                   | APOC3          | 0,03 |
| BPI fold containing family B, member 2                                                                 | BPIFB2         | 0,03 |
| serpin peptidase inhibitor, clade F (alpha-2 antiplasmin, pigment epithelium derived factor), member 2 | SERPINF2       | 0,03 |
| immunoglobulin superfamily, member 1                                                                   | IGSF1          | 0,02 |
| solute carrier family 29 (equilibrative nucleoside transporter), member 4                              | SLC29A4        | 0,02 |
| coagulation factor XI                                                                                  | F11            | 0,02 |
| microsomal triglyceride transfer protein                                                               | MTTP           | 0,02 |
| glucose-6-phosphatase, catalytic subunit                                                               | G6PC           | 0,02 |
| nuclear receptor subfamily 1, group H, member 4                                                        | NR1H4          | 0,02 |
| ceruloplasmin (ferroxidase)                                                                            | CP             | 0,02 |
| lysyl oxidase                                                                                          | LOX            | 0,02 |
| serpin peptidase inhibitor, clade A (alpha-1 antiproteinase, antitrypsin), member 5                    | SERPINA5       | 0,02 |
| progastricsin (pepsinogen C)                                                                           | PGC            | 0,02 |
| fatty acid binding protein 1, liver                                                                    | FABP1          | 0,02 |
| serpin peptidase inhibitor, clade A (alpha-1 antiproteinase, antitrypsin), member 7                    | SERPINA7       | 0,01 |
| sulfotransferase family 2A member 1                                                                    | SULT2A1        | 0,01 |
| odontogenic, ameloblast associated                                                                     | ODAM           | 0,01 |
| homeobox D1; microRNA 7704                                                                             | HOXD1; MIR7704 | 0,01 |
| klotho beta                                                                                            | KLB            | 0,01 |
| solute carrier family 6 (amino acid transporter), member 14                                            | SLC6A14        | 0,00 |
