# Supplementary material for: A Multi-Omics Approach to Evaluate the Toxicity Mechanisms Associated with Silver Nanoparticles Exposure
Source: Nanomaterials (Basel). 2022 May 22;12(10):1762. doi: 10.3390/nano12101762 (PMC9146515; doi:10.3390/nano12101762)
Supplement: Supplementary file 1 [file nanomaterials-12-01762-s001.zip]

Archive with 4 entries (4 files):
- Figure S1.pdf
- Figure S2.pdf
- Supplemental Tables S1 and S2.pdf
- Table S3.pdf
