# Supplementary figures and images for: A Multi-Omics Approach to Evaluate the Toxicity Mechanisms Associated with Silver Nanoparticles Exposure
Source: MDPI journal article supplement (doi:10.3390/nano12101762), 2022-05-22

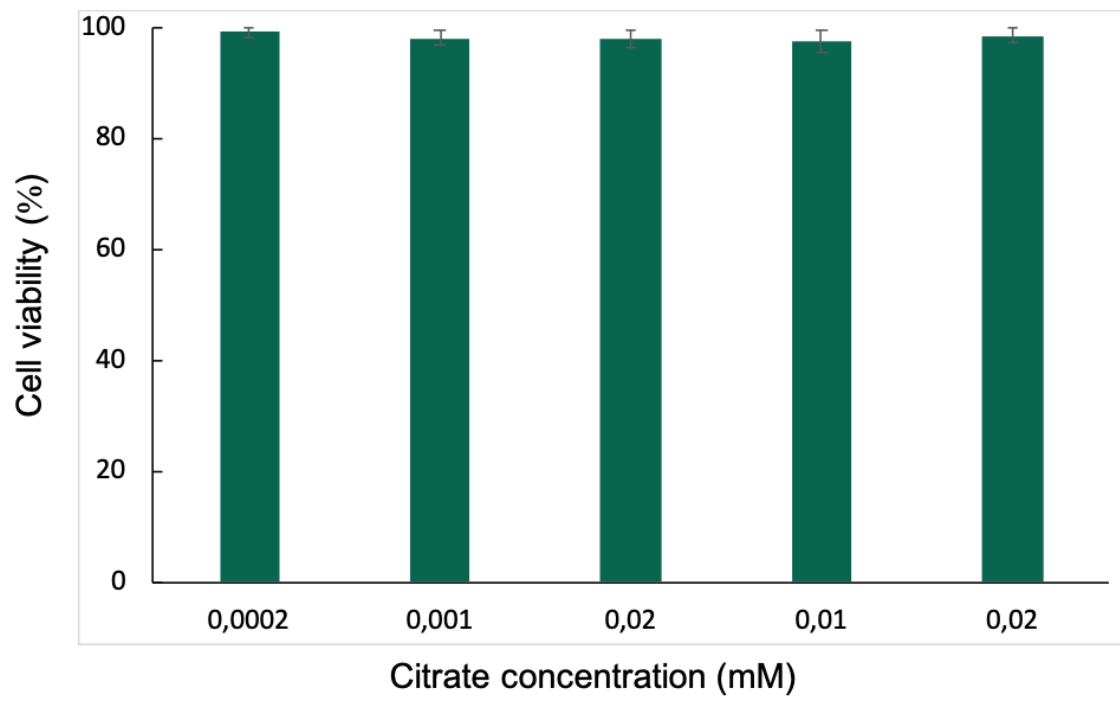

Figure S2. MTT-based cell viability assay of HepG2 cells exposed to citrate

Supplement: s1 [file s1]

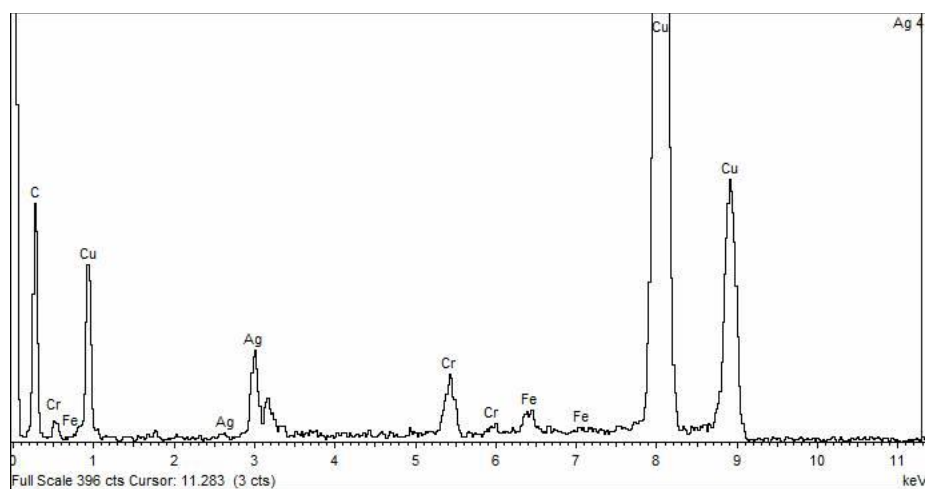

Figure S1. EDX spectra obtained for the 10 nm AgNPs.

Supplement: s1 [file s1]
